# Supplementary material for: Diorganotin(iv) 2-pyridyl and 2-pyrimidyl thiolates: synthesis, structures and their utility as molecular precursors for the preparation of tin sulfide nanosheets
Source: Royal Society of Chemistry journal article supplement (doi:10.1039/c5ra09267a), 2015-01-01
Supplement: c5ra09267a1.pdf [file c5ra09267a1.pdf]

## Supporting information

### Diorganotin(IV) 2-pyridyl and 2-pyrimidyl thiolates: Synthesis, structures and their utility as molecular precursors for the preparation of tin sulfide nanosheets

Adish Tyagi, G. Kedarnath, Amey Wadawale, Vimal K. Jain, Mukesh Kumar and B. Vishwanadh

#### Figure Captions

**Fig. S1** Thermo gravimetric curve of  $[\text{Me}_2\text{Sn}(2\text{-SC}_5\text{H}_4\text{N})_2]$  (**1**) with a scan rate of a) 10 °Cmin<sup>-1</sup> and b) 3 °Cmin<sup>-1</sup>, respectively.

**Fig. S2** Thermo gravimetric and its differential curve of  $[\text{Et}_2\text{Sn}(2\text{-SC}_5\text{H}_4\text{N})_2]$  (**2**).

**Fig. S3** Thermo gravimetric curve of  $[\text{Me}_2\text{SnCl}\{\text{SC}_4\text{H}(\text{Me-4,6})_2\text{N}_2\}]$  (**4**).

**Fig. S4** Thermo gravimetric and its differential curve of  $[\text{Et}_2\text{SnCl}\{\text{SC}_4\text{H}(\text{Me-4,6})_2\text{N}_2\}]$  (**5**).

**Fig. S5** <sup>119</sup>Sn{<sup>1</sup>H} NMR spectra (CDCl<sub>3</sub>) of (a) Freshly prepared  $[\text{Et}_2\text{SnCl}\{\text{SC}_4\text{H}(\text{Me-4,6})_2\text{N}_2\}]$  (**5**) (b) sublimed product from **5** at 200 °C under vacuum. The formation of  $[\text{Et}_2\text{Sn}\{\text{SC}_4\text{H}(\text{Me-4,6})_2\text{N}_2\}_2]$  indicates disproportionation of **5** into  $[\text{Et}_2\text{Sn}\{\text{SC}_4\text{H}(\text{Me-4,6})_2\text{N}_2\}_2]$  and Et<sub>2</sub>SnCl<sub>2</sub>.

**Fig. S6** <sup>1</sup>H NMR spectrum of  $[\text{Me}_2\text{Sn}(2\text{-SC}_5\text{H}_4\text{N})_2]$  (**1**) acquired in CDCl<sub>3</sub>.

**Fig. S7** <sup>13</sup>C{<sup>1</sup>H} NMR spectrum of  $[\text{Me}_2\text{Sn}(2\text{-SC}_5\text{H}_4\text{N})_2]$  (**1**) acquired in CDCl<sub>3</sub>.

**Fig. S8** <sup>119</sup>Sn{<sup>1</sup>H} NMR spectrum of  $[\text{Me}_2\text{Sn}(2\text{-SC}_5\text{H}_4\text{N})_2]$  (**1**) acquired in CDCl<sub>3</sub>.

**Fig. S9** <sup>13</sup>C{<sup>1</sup>H} NMR spectrum of  $[\text{Et}_2\text{Sn}(2\text{-SC}_5\text{H}_4\text{N})_2]$  (**2**) acquired in CDCl<sub>3</sub>.

**Fig. S10** <sup>119</sup>Sn{<sup>1</sup>H} NMR spectrum of  $[\text{Et}_2\text{Sn}(2\text{-SC}_5\text{H}_4\text{N})_2]$  (**2**) acquired in CDCl<sub>3</sub>.

**Fig. S11** <sup>13</sup>C{<sup>1</sup>H} NMR spectrum of  $[\text{Me}_2\text{SnCl}\{\text{SC}_4\text{H}(\text{Me-4,6})_2\text{N}_2\}]$  (**4**) acquired in CDCl<sub>3</sub>.

**Fig. S12** <sup>119</sup>Sn{<sup>1</sup>H} NMR spectrum of  $[\text{Me}_2\text{SnCl}\{\text{SC}_4\text{H}(\text{Me-4,6})_2\text{N}_2\}]$  (**4**) acquired in CDCl<sub>3</sub>.

**Fig. S13** <sup>13</sup>C{<sup>1</sup>H} NMR spectrum of  $[\text{Et}_2\text{SnCl}\{\text{SC}_4\text{H}(\text{Me-4,6})_2\text{N}_2\}]$  (**5**) acquired in CDCl<sub>3</sub>.

**Fig. S14** <sup>119</sup>Sn{<sup>1</sup>H} NMR spectrum of  $[\text{Et}_2\text{SnCl}\{\text{SC}_4\text{H}(\text{Me-4,6})_2\text{N}_2\}]$  (**5**) acquired in CDCl<sub>3</sub>.

**Fig. S15** XRD profile of SnS nanosheets obtained by thermolysis of  $[\text{Et}_2\text{SnCl}\{\text{SC}_4\text{H}(\text{Me-4,6})_2\text{N}_2\}]$  (**5**) in TOPO-OLA at 300 °C overlaid on simulated XRD pattern of orthorhombic SnS (JCPDS-39-0354) and the peaks denoted with '\*' corresponds to hexagonal SnS<sub>2</sub> (JCPDS-83-1705).

**Fig. S16** FT-IR spectra of a) oleylamine (OLA), b) SnS nanosheets obtained by thermolysis of  $[\text{Et}_2\text{Sn}(2\text{-SC}_5\text{H}_4\text{N})_2]$  (**2**) in OLA at 300 °C for 10 minutes and by thermolysis of  $[\text{Et}_2\text{SnCl}\{\text{SC}_4\text{H}(\text{Me-4,6})_2\text{N}_2\}]$  (**5**) in OLA at 300 °C for c) 5 and d) 10 minutes, respectively.

**Fig. S17** A representative thermo gravimetric curve of SnS nanosheets obtained by thermolysis of  $[\text{Et}_2\text{SnCl}\{\text{SC}_4\text{H}(\text{Me-4,6})_2\text{N}_2\}]$  (**5**) in OLA at 300 °C.

**Fig. 18** XRD pattern of SnS nanosheets obtained by thermolysis of  $[\text{Et}_2\text{Sn}(2\text{-SC}_5\text{H}_4\text{N})_2]$  (**2**) in OLA at 300 °C for 10 minutes with a scan rate of a)  $4^\circ\text{min}^{-1}$  and b)  $2^\circ\text{min}^{-1}$ , respectively.

**Fig. 19** XRD pattern of SnS nanosheets obtained by thermolysis of  $[\text{Et}_2\text{SnCl}\{\text{SC}_4\text{H}(\text{Me-4,6})_2\text{N}_2\}]$  (**5**) in OLA at 300 °C for 10 minutes with a scan rate of a)  $4^\circ\text{min}^{-1}$  and b)  $2^\circ\text{min}^{-1}$ , respectively.

CIF of  $[\text{Et}_2\text{Sn}(2\text{-SC}_5\text{H}_4\text{N})_2]$  (**2**)

CIF of  $[\text{Me}_2\text{SnCl}\{\text{SC}_4\text{H}(\text{Me-4,6})_2\text{N}_2\}]$  (**4**)

CIF of  $[\text{Et}_2\text{SnCl}\{\text{SC}_4\text{H}(\text{Me-4,6})_2\text{N}_2\}]$  (**5**)

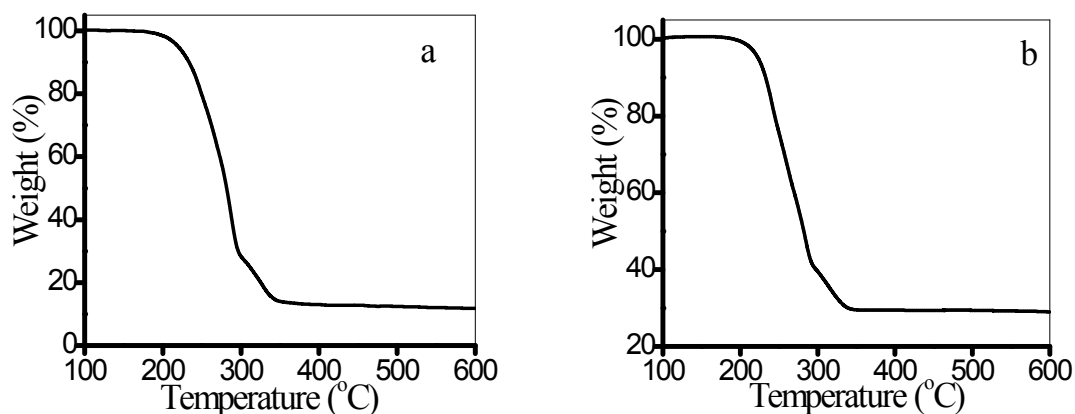

**Fig. S1** Thermo gravimetric curve of  $[\text{Me}_2\text{Sn}(2\text{-SC}_5\text{H}_4\text{N})_2]$  (**1**) with a scan rate of a)  $10^\circ\text{Cmin}^{-1}$  and b)  $3^\circ\text{Cmin}^{-1}$ , respectively.

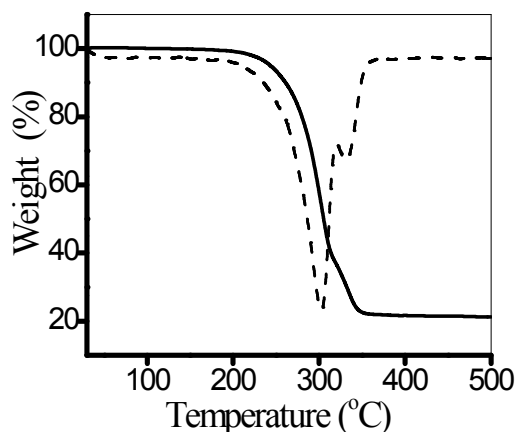

**Fig. S2** Thermo gravimetric and its differential curve of  $[\text{Et}_2\text{Sn}(2\text{-SC}_5\text{H}_4\text{N})_2]$  (**2**).

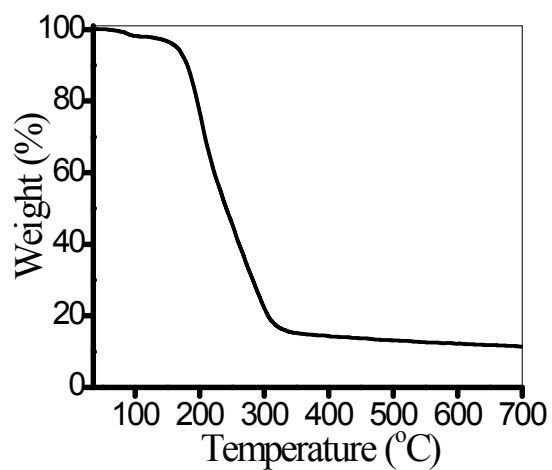

**Fig. S3** Thermo gravimetric curve of  $[\text{Me}_2\text{SnCl}\{\text{SC}_4\text{H}(\text{Me-4,6})_2\text{N}_2\}]$  (**4**).

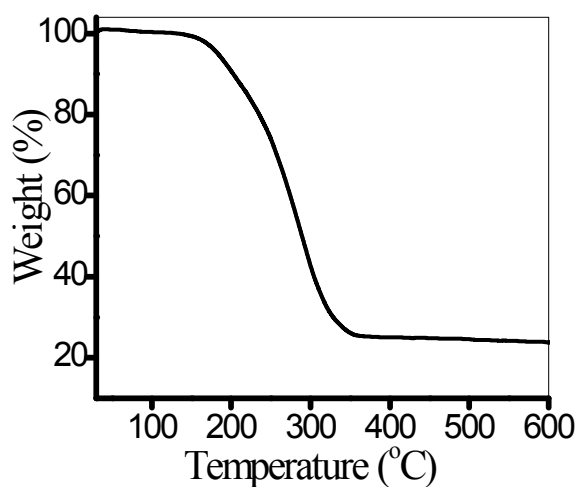

**Fig. S4** Thermo gravimetric and its differential curve of  $[\text{Et}_2\text{SnCl}\{\text{SC}_4\text{H}(\text{Me-4,6})_2\text{N}_2\}]$  (**5**).

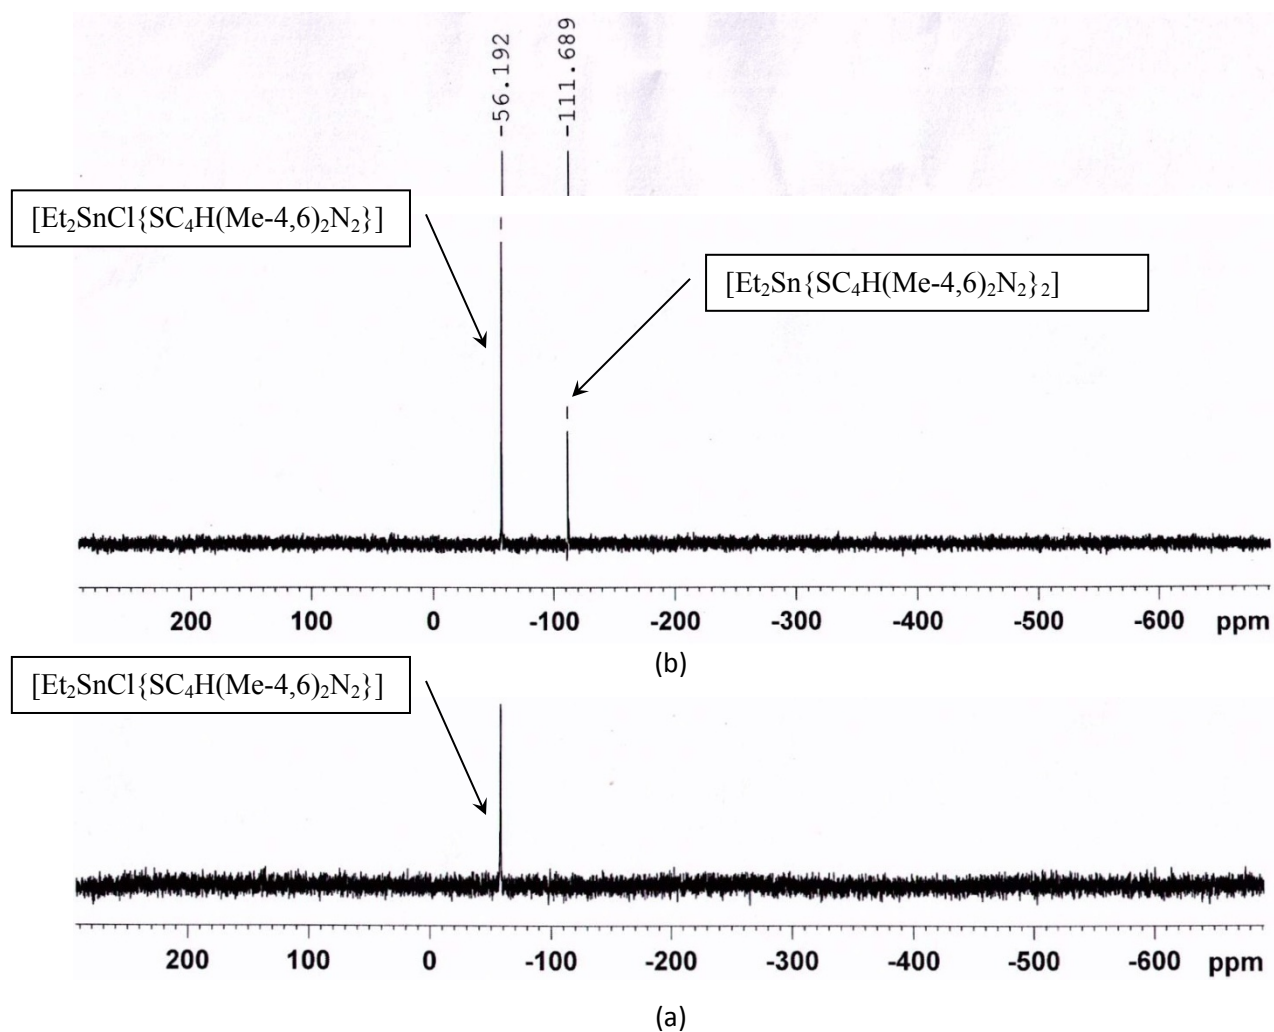

**Fig. S5**  $^{119}\text{Sn}\{^1\text{H}\}$  NMR spectra ( $\text{CDCl}_3$ ) of (a) Freshly prepared  $[\text{Et}_2\text{SnCl}\{\text{SC}_4\text{H}(\text{Me-4,6})_2\text{N}_2\}]$  (5) (b) sublimed product from 5 at  $200^\circ\text{C}$  under vacuum. The formation of  $[\text{Et}_2\text{Sn}\{\text{SC}_4\text{H}(\text{Me-4,6})_2\text{N}_2\}_2]$  indicates disproportionation of 5 into  $[\text{Et}_2\text{Sn}\{\text{SC}_4\text{H}(\text{Me-4,6})_2\text{N}_2\}_2]$  and  $\text{Et}_2\text{SnCl}_2$ .

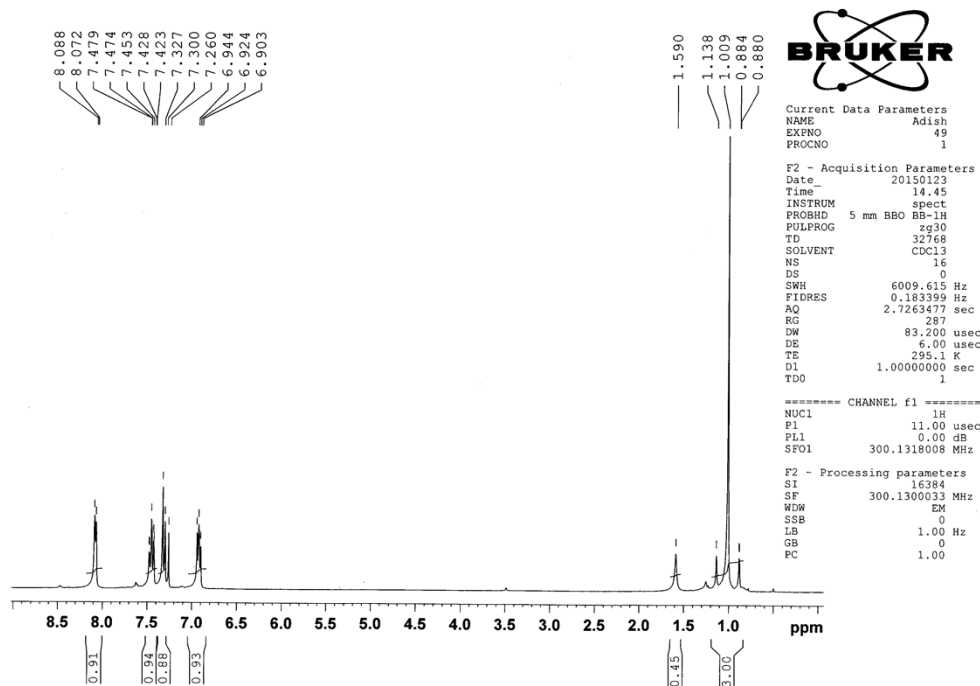

Fig. S6  $^1\text{H}$  NMR spectrum of  $[\text{Me}_2\text{Sn}(2\text{-SC}_5\text{H}_4\text{N})_2]$  (**1**) acquired in  $\text{CDCl}_3$ .

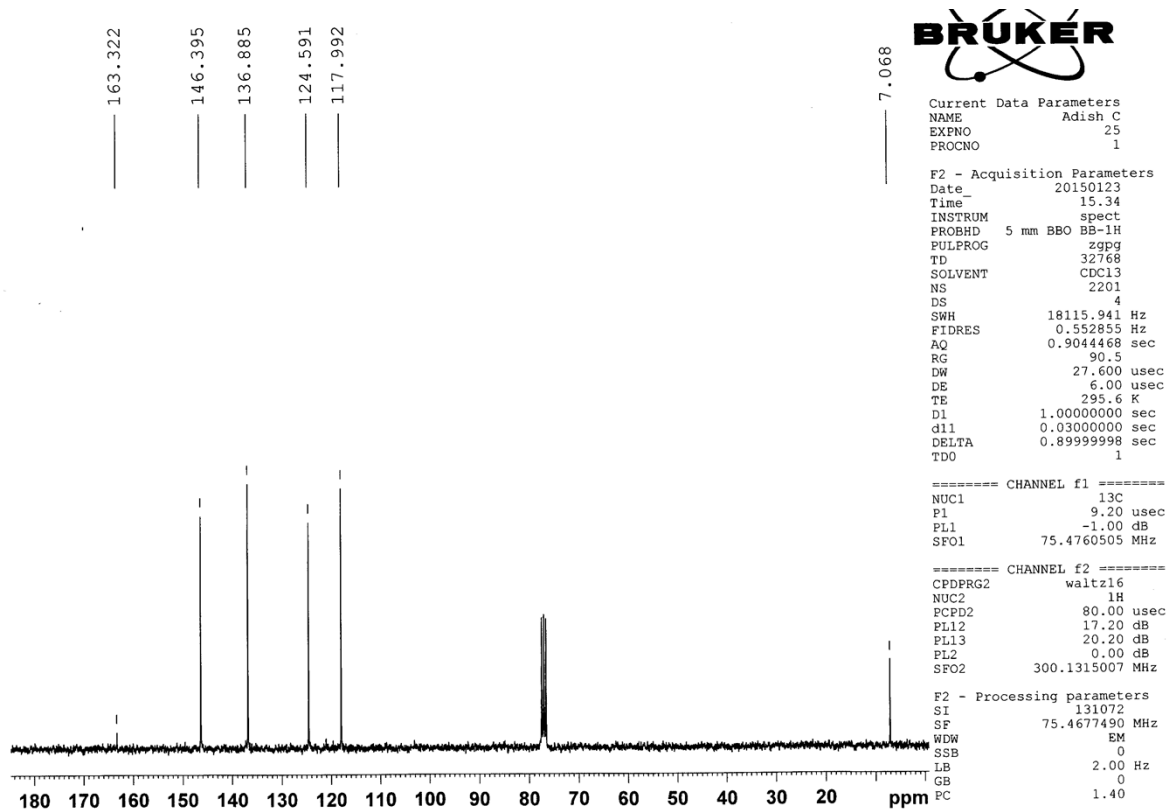

Fig. S7  $^{13}\text{C}\{^1\text{H}\}$  NMR spectrum of  $[\text{Me}_2\text{Sn}(2\text{-SC}_5\text{H}_4\text{N})_2]$  (**1**) acquired in  $\text{CDCl}_3$ .

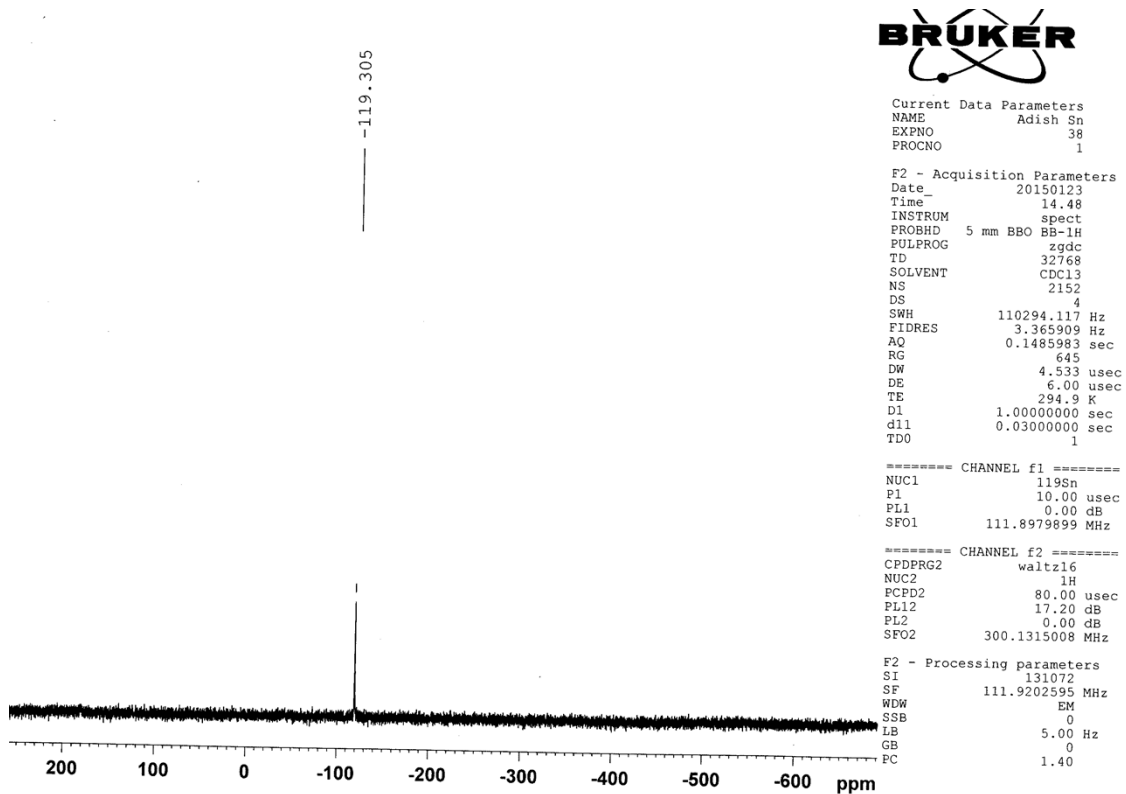

Fig. S8  $^{119}\text{Sn}\{^1\text{H}\}$  NMR spectrum of  $[\text{Me}_2\text{Sn}(2\text{-SC}_5\text{H}_4\text{N})_2]$  (1) acquired in  $\text{CDCl}_3$ .

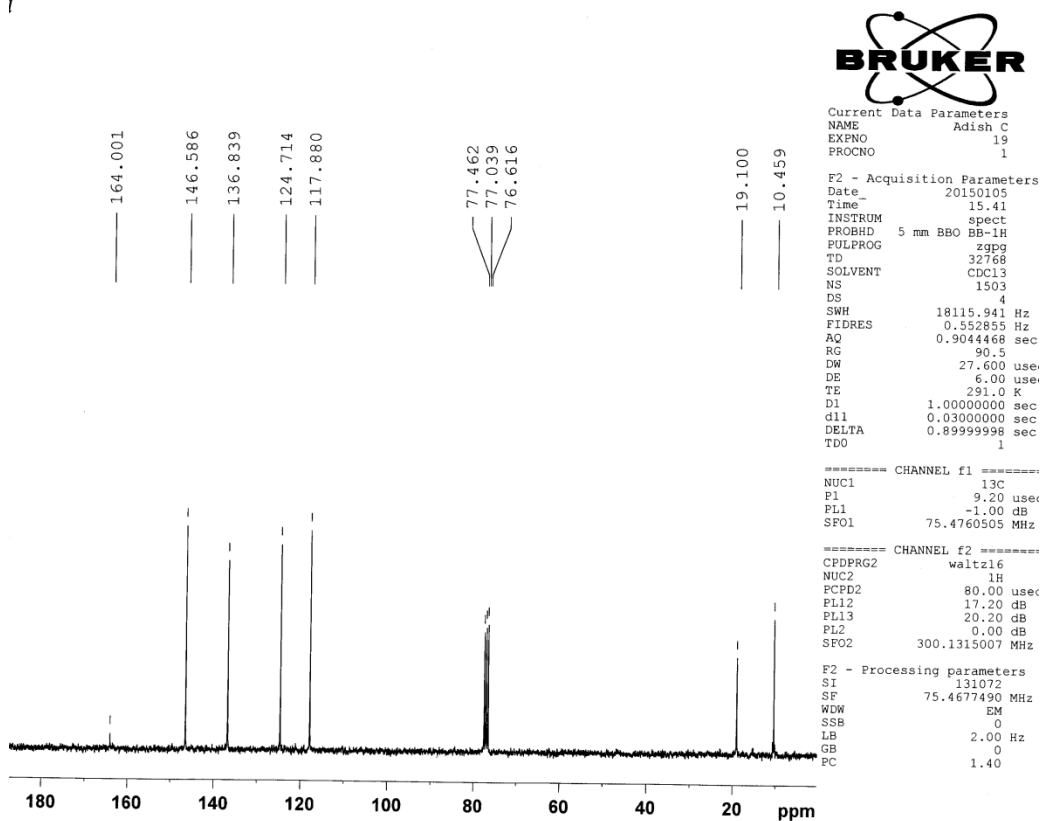

Fig. S9  $^{13}\text{C}\{^1\text{H}\}$  NMR spectrum of  $[\text{Et}_2\text{Sn}(2\text{-SC}_5\text{H}_4\text{N})_2]$  (2) acquired in  $\text{CDCl}_3$ .

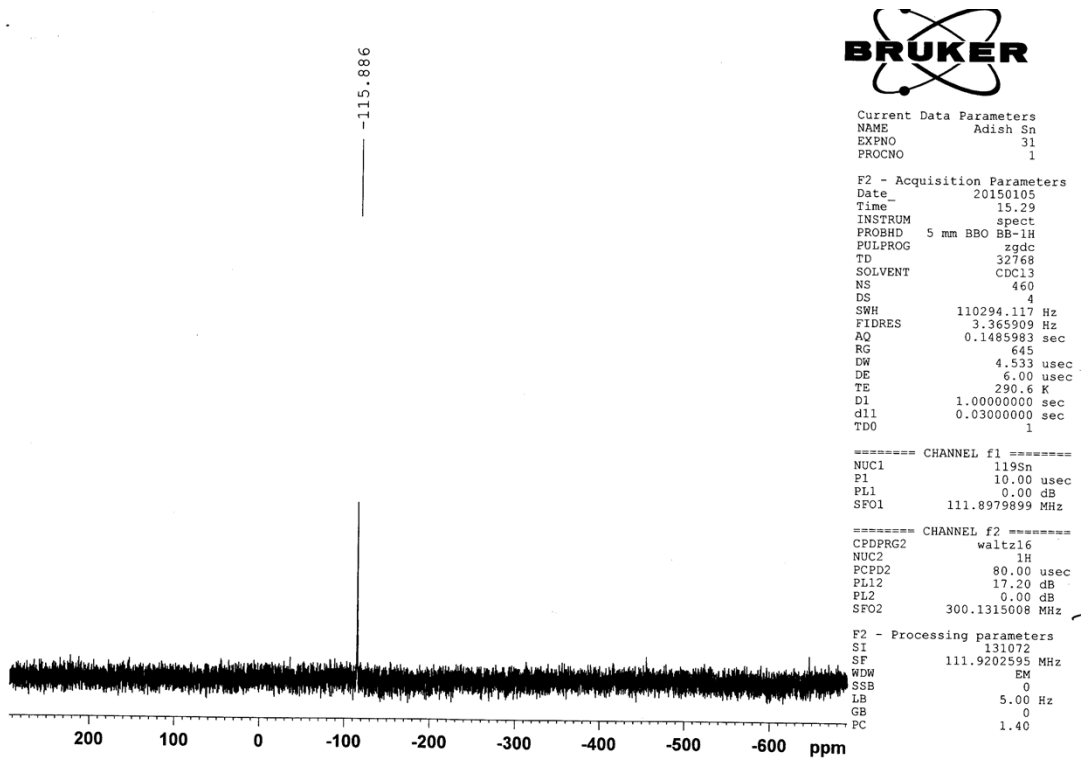

Fig. S10  $^{119}\text{Sn}\{^1\text{H}\}$  NMR spectrum of  $[\text{Et}_2\text{Sn}(2\text{-SC}_5\text{H}_4\text{N})_2]$  (**2**) acquired in  $\text{CDCl}_3$ .

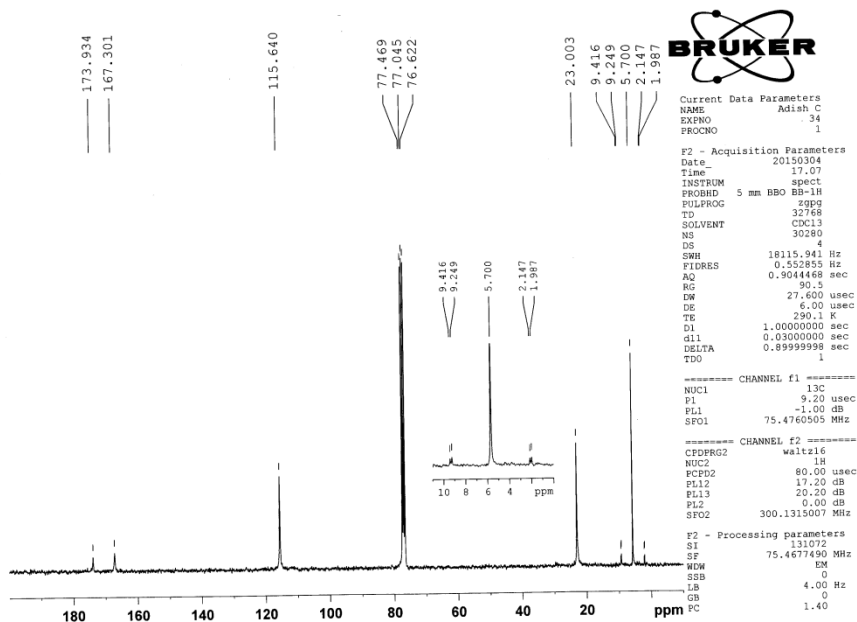

Fig. S11  $^{13}\text{C}\{^1\text{H}\}$  NMR spectrum of  $[\text{Me}_2\text{SnCl}\{\text{SC}_4\text{H}(\text{Me-4,6})_2\text{N}_2\}]$  (**4**) acquired in  $\text{CDCl}_3$ .

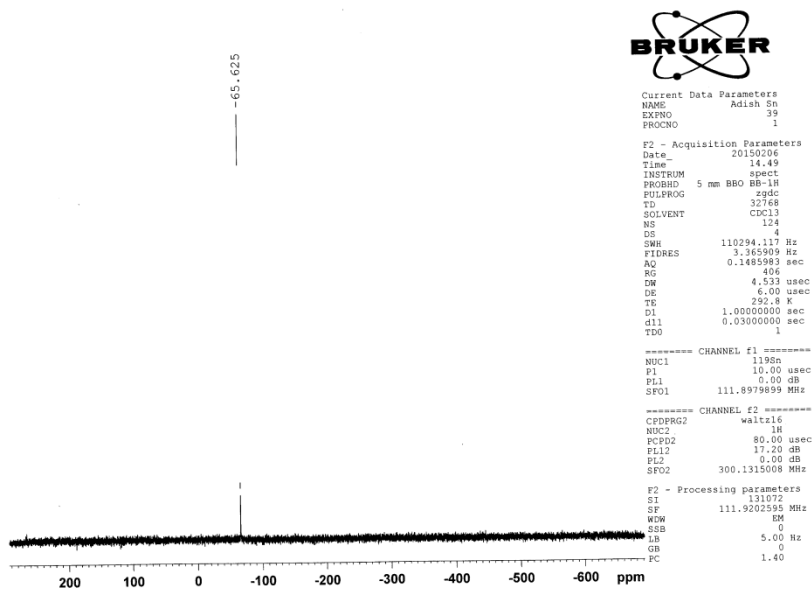

**Fig. S12**  $^{119}\text{Sn}\{^1\text{H}\}$  NMR spectrum of  $[\text{Me}_2\text{SnCl}\{\text{SC}_4\text{H}(\text{Me-4,6})_2\text{N}_2\}]$  (**4**) acquired in  $\text{CDCl}_3$ .

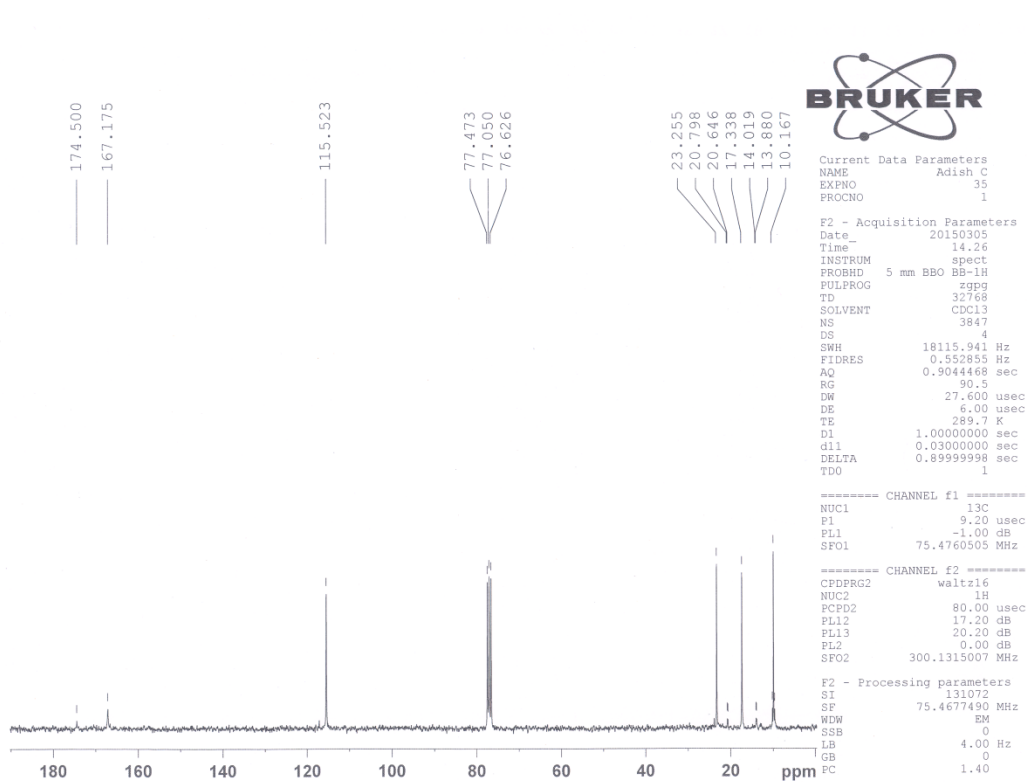

**Fig. S13**  $^{13}\text{C}\{^1\text{H}\}$  NMR spectrum of  $[\text{Et}_2\text{SnCl}\{\text{SC}_4\text{H}(\text{Me-4,6})_2\text{N}_2\}]$  (**5**) acquired in  $\text{CDCl}_3$ .



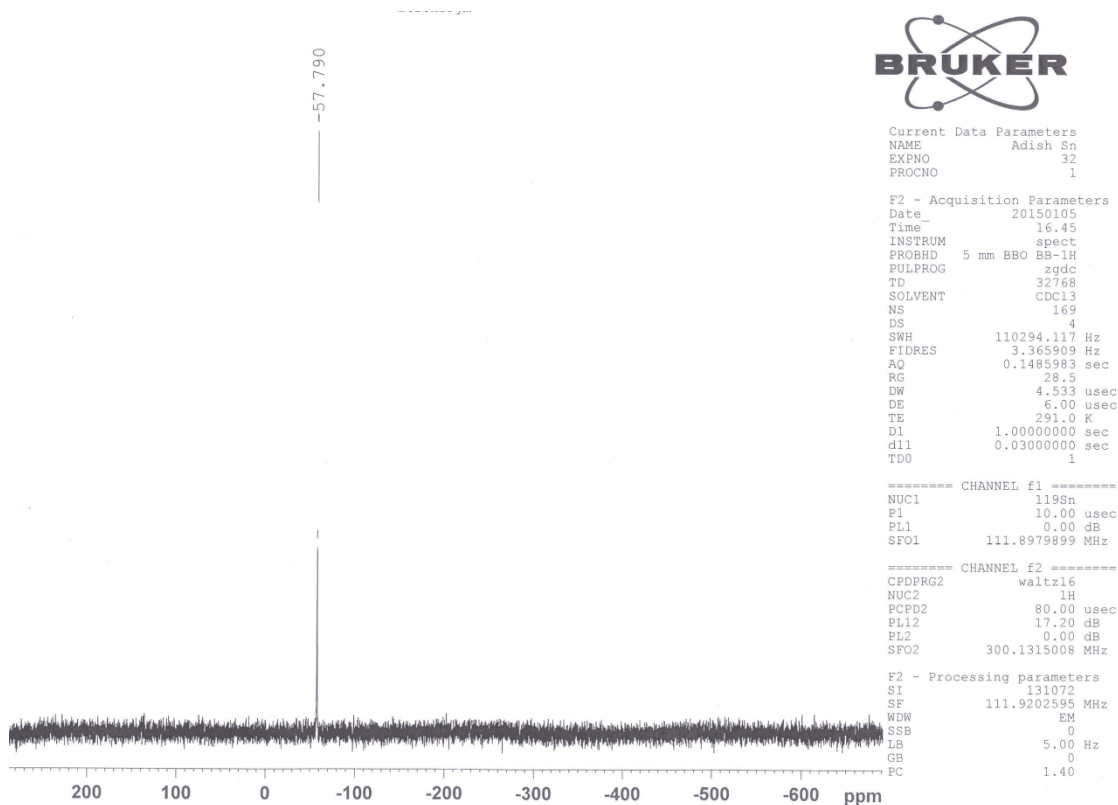

**Fig. S14**  $^{119}\text{Sn}\{^1\text{H}\}$  NMR spectrum of  $[\text{Et}_2\text{SnCl}\{\text{SC}_4\text{H}(\text{Me-4,6})_2\text{N}_2\}]$  (**5**) acquired in  $\text{CDCl}_3$ .

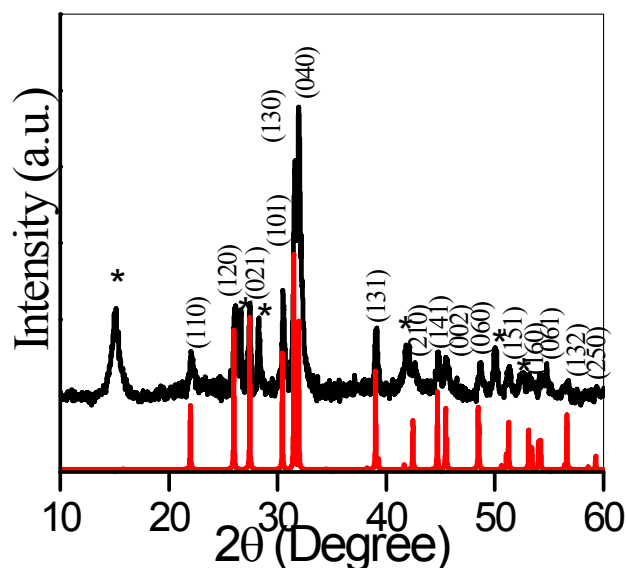

**Fig. S15** XRD profile of SnS nanosheets obtained by thermolysis of  $[\text{Et}_2\text{SnCl}\{\text{SC}_4\text{H}(\text{Me-4,6})_2\text{N}_2\}]$  (**5**) in TOPO-OLA at 300 °C overlaid on simulated XRD pattern of orthorhombic SnS (JCPDS-39-0354) and the peaks denoted with '\*' corresponds to hexagonal  $\text{SnS}_2$  (JCPDS-83-1705).

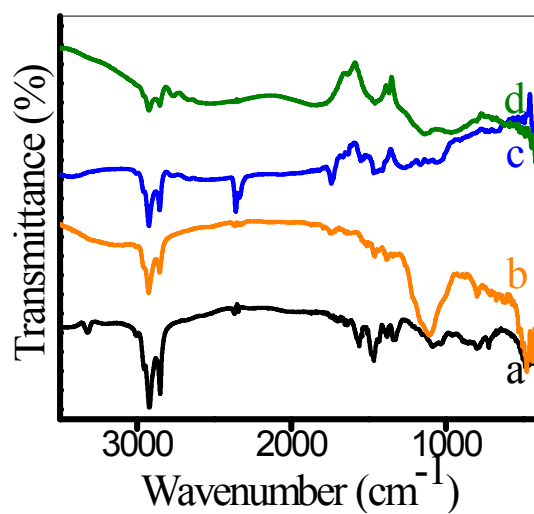

**Fig. S16** FT-IR spectra of a) oleylamine (OLA), b) SnS nanosheets obtained by thermolysis of [Et<sub>2</sub>Sn(2-SC<sub>5</sub>H<sub>4</sub>N)<sub>2</sub>] (**2**) in OLA at 300 °C for 10 minutes and by thermolysis of [Et<sub>2</sub>SnCl{SC<sub>4</sub>H(Me-4,6)<sub>2</sub>N<sub>2</sub>}] (**5**) in OLA at 300 °C for c) 5 and d) 10 minutes, respectively.

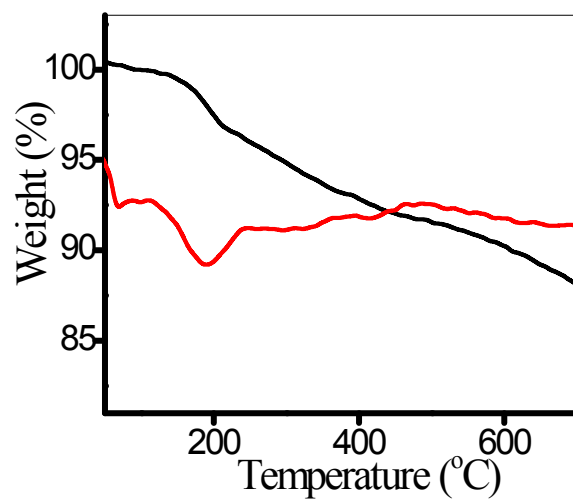

**Fig. S17** A representative thermogravimetric curve of SnS nanosheets obtained by thermolysis of  $[\text{Et}_2\text{SnCl}\{\text{SC}_4\text{H}(\text{Me-4,6})_2\text{N}_2\}]$  (**5**) in OLA at 300 °C.

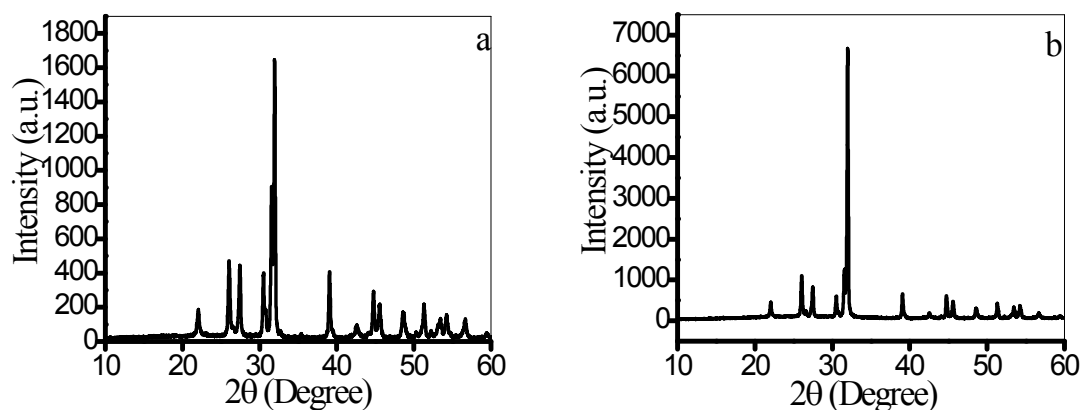

**Fig. 18** XRD pattern of SnS nanosheets obtained by thermolysis of  $[\text{Et}_2\text{Sn}(2\text{-SC}_5\text{H}_4\text{N})_2]$  (**2**) in OLA at 300 °C for 10 minutes with a scan rate of a)  $4^\circ\text{min}^{-1}$  and b)  $2^\circ\text{min}^{-1}$ , respectively.

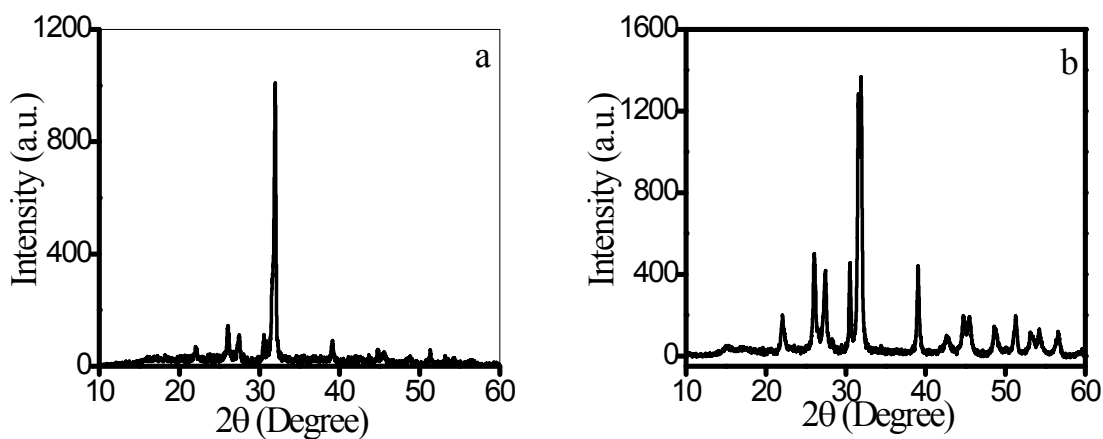

**Fig. 19** XRD pattern of SnS nanosheets obtained by thermolysis of  $[\text{Et}_2\text{SnCl}\{\text{SC}_4\text{H}(\text{Me-4,6})_2\text{N}_2\}]$  (**5**) in OLA at 300 °C for 10 minutes with a scan rate of a)  $4^\circ\text{min}^{-1}$  and b)  $2^\circ\text{min}^{-1}$ , respectively.

CIF of [Et<sub>2</sub>Sn(2-SC<sub>5</sub>H<sub>4</sub>N)<sub>2</sub>] (2)

data\_shelx

```
_audit_creation_method      SHELXL-2014/6
_chemical_name_systematic   ?
_chemical_name_common       ?
_chemical_melting_point     ?
_chemical_formula_moiety    ?
_chemical_formula_sum       'C14 H18 N2 S2 Sn'
_chemical_formula_weight    397.11
```

loop\_

```
_atom_type_symbol
_atom_type_description
_atom_type_scatter_dispersion_real
_atom_type_scatter_dispersion_imag
_atom_type_scatter_source
'C' 'C' 0.0181 0.0091
'International Tables Vol C Tables 4.2.6.8 and 6.1.1.4'
'H' 'H' 0.0000 0.0000
'International Tables Vol C Tables 4.2.6.8 and 6.1.1.4'
'N' 'N' 0.0311 0.0180
'International Tables Vol C Tables 4.2.6.8 and 6.1.1.4'
'S' 'S' 0.3331 0.5567
'International Tables Vol C Tables 4.2.6.8 and 6.1.1.4'
'Sn' 'Sn' 0.0259 5.4591
'International Tables Vol C Tables 4.2.6.8 and 6.1.1.4'
```

```
_space_group_crystal_system orthorhombic
_space_group_IT_number      62
_space_group_name_H-M_alt   'P n m a'
_space_group_name_Hall      '-P 2ac 2n'
```

\_shelx\_space\_group\_comment

;

The symmetry employed for this shelxl refinement is uniquely defined by the following loop, which should always be used as a source of symmetry information in preference to the above space-group names. They are only intended as comments.

;

loop\_

```
_space_group_symop_operation_xyz
'x, y, z'
'-x+1/2, -y, z+1/2'
'x+1/2, -y+1/2, -z+1/2'
'-x, y+1/2, -z'
'-x, -y, -z'
'x-1/2, y, -z-1/2'
'-x-1/2, y-1/2, z-1/2'
'x, -y-1/2, z'
```

```
_cell_length_a      9.9262(13)
_cell_length_b      17.2292(9)
_cell_length_c      9.7256(8)
_cell_angle_alpha   90
_cell_angle_beta    90
```

```

_cell_angle_gamma          90
_cell_volume                1663.3(3)
_cell_formula_units_Z      4
_cell_measurement_temperature 298(2)
_cell_measurement_reflns_used 1013
_cell_measurement_theta_min 6.3530
_cell_measurement_theta_max 69.2060

_exptl_crystal_description 'block'
_exptl_crystal_colour      'colorless'
_exptl_crystal_density_meas ?
_exptl_crystal_density_method ?
_exptl_crystal_density_diffrn 1.586
_exptl_crystal_F_000       792
_exptl_transmission_factor_min ?
_exptl_transmission_factor_max ?
_exptl_crystal_size_max    0.100
_exptl_crystal_size_mid    0.100
_exptl_crystal_size_min    0.050
_exptl_absorpt_coefficient_mu 14.467
_shelx_estimated_absorpt_T_min 0.326
_shelx_estimated_absorpt_T_max 0.532
_exptl_absorpt_correction_T_min 0.24450
_exptl_absorpt_correction_T_max 1.00000
_exptl_absorpt_correction_type 'multi-scan'
_exptl_absorpt_process_details
;
CrysAlisPro, Agilent Technologies,
Version 1.171.36.32 (release 02-08-2013 CrysAlis171 .NET)
(compiled Aug  2 2013,16:46:58)
Analytical numeric absorption correction using a multifaceted crystal
model based on expressions derived by R.C. Clark &
J.S. Reid.
(Clark, R. C. & Reid, J. S. (1995). Acta Cryst. A51, 887-897)
;
_exptl_absorpt_special_details ?
_diffn_ambient_temperature 298(2)
_diffn_radiation_wavelength 1.54184
_diffn_radiation_type      CuK\alpha
_diffn_radiation_source    'fine-focus sealed tube'
_diffn_radiation_monochromator graphite
_diffn_measurement_device_type 'SuperNova, Single source at offset,
Titan'
_diffn_measurement_method  '\w scans'
_diffn_detector_area_resol_mean ?
_diffn_reflns_number       3169
_diffn_reflns_av_unetI/netI 0.0411
_diffn_reflns_av_R_equivalents 0.0349
_diffn_reflns_limit_h_min  -6
_diffn_reflns_limit_h_max  11
_diffn_reflns_limit_k_min  -19
_diffn_reflns_limit_k_max  20
_diffn_reflns_limit_l_min  -11
_diffn_reflns_limit_l_max  11
_diffn_reflns_theta_min    5.134
_diffn_reflns_theta_max    70.256
_diffn_reflns_theta_full   67.684
_diffn_measured_fraction_theta_max 0.975

```

```

_diffrn_measured_fraction_theta_full  0.993
_diffrn_reflns_Laue_measured_fraction_max  0.975
_diffrn_reflns_Laue_measured_fraction_full  0.993
_diffrn_reflns_point_group_measured_fraction_max  0.975
_diffrn_reflns_point_group_measured_fraction_full  0.993
_reflns_number_total  1587
_reflns_number_gt  920
_reflns_threshold_expression  'I > 2\s(I) '
_reflns_Friedel_coverage  0.000
_reflns_Friedel_fraction_max  .
_reflns_Friedel_fraction_full  .

_reflns_special_details
;
Reflections were merged by SHELXL according to the crystal
class for the calculation of statistics and refinement.

_reflns_Friedel_fraction is defined as the number of unique
Friedel pairs measured divided by the number that would be
possible theoretically, ignoring centric projections and
systematic absences.
;

_computing_cell_refinement
;
CrysAlisPro, Agilent Technologies,
Version 1.171.36.32 (release 02-08-2013 CrysAlis171 .NET)
(compiled Aug  2 2013,16:46:58)
;
_computing_data_collection
;
CrysAlisPro, Agilent Technologies,
Version 1.171.36.32 (release 02-08-2013 CrysAlis171 .NET)
(compiled Aug  2 2013,16:46:58)
;
_computing_data_reduction
;
CrysAlisPro, Agilent Technologies,
Version 1.171.36.32 (release 02-08-2013 CrysAlis171 .NET)
(compiled Aug  2 2013,16:46:58)
;
_computing_structure_solution  'SIR92'
_computing_structure_refinement 'SHELXL-2014/6 (Sheldrick, 2014) '
_computing_molecular_graphics  'Ortep-3 for windows'
_computing_publication_material 'WinGX 1.70.01'
_refine_special_details  ?
_refine_ls_structure_factor_coef  Fsqd
_refine_ls_matrix_type  full
_refine_ls_weighting_scheme  calc
_refine_ls_weighting_details
'w=1/[\s^2^(Fo^2^)+(0.1351P)^2^+0.8267P] where P=(Fo^2^+2Fc^2^)/3'
_atom_sites_solution_primary  ?
_atom_sites_solution_secondary  ?
_atom_sites_solution_hydrogens  geom
_refine_ls_hydrogen_treatment  constr
_refine_ls_extinction_method  SHELXL
_refine_ls_extinction_coef  0.0032(6)
_refine_ls_extinction_expression

```

```
'Fc**^=kFc[1+0.001xFc^2^\l^3^\sin(2\q)]^-1/4^'
```

|                                |        |
|--------------------------------|--------|
| _refine_ls_number_reflns       | 1587   |
| _refine_ls_number_parameters   | 95     |
| _refine_ls_number_restraints   | 9      |
| _refine_ls_R_factor_all        | 0.1017 |
| _refine_ls_R_factor_gt         | 0.0706 |
| _refine_ls_wR_factor_ref       | 0.2518 |
| _refine_ls_wR_factor_gt        | 0.2017 |
| _refine_ls_goodness_of_fit_ref | 1.091  |
| _refine_ls_restrained_S_all    | 1.091  |
| _refine_ls_shift/su_max        | 0.000  |
| _refine_ls_shift/su_mean       | 0.000  |

```
loop_
  _atom_site_label
  _atom_site_type_symbol
  _atom_site_fract_x
  _atom_site_fract_y
  _atom_site_fract_z
  _atom_site_U_iso_or_equiv
  _atom_site_adp_type
  _atom_site_occupancy
  _atom_site_site_symmetry_order
  _atom_site_calc_flag
  _atom_site_refinement_flags_posn
  _atom_site_refinement_flags_adp
  _atom_site_refinement_flags_occupancy
  _atom_site_disorder_assembly
  _atom_site_disorder_group
C1 C 0.7384(15) 0.9232(8) 0.0598(12) 0.106(4) Uani 1 1 d . . . . .
C2 C 0.7103(18) 1.0041(8) 0.0527(16) 0.140(6) Uani 1 1 d . . . . .
H1 H 0.6331 1.0225 0.0094 0.168 Uiso 1 1 calc R U . . .
C3 C 0.801(2) 1.0538(8) 0.112(2) 0.155(7) Uani 1 1 d . . . . .
H2 H 0.7838 1.1069 0.1125 0.186 Uiso 1 1 calc R U . . .
C4 C 0.916(3) 1.0256(9) 0.1700(18) 0.164(7) Uani 1 1 d . . . . .
H3 H 0.9779 1.0591 0.2104 0.196 Uiso 1 1 calc R U . . .
C5 C 0.939(2) 0.9484(8) 0.1679(16) 0.160(7) Uani 1 1 d . . . . .
H4 H 1.0185 0.9294 0.2048 0.192 Uiso 1 1 calc R U . . .
C6 C 0.733(5) 0.7500 0.293(3) 0.37(4) Uani 1 2 d DS TU P . .
H6A H 0.6785 0.7954 0.3136 0.440 Uiso 0.5 1 calc R U P . .
H6B H 0.6785 0.7046 0.3136 0.440 Uiso 0.5 1 calc R U P . .
C7 C 0.848(5) 0.7500 0.383(2) 0.44(4) Uani 1 2 d DS TU P . .
H7A H 0.8187 0.7500 0.4772 0.665 Uiso 1 2 calc R U P . .
H7B H 0.9016 0.7045 0.3661 0.665 Uiso 0.5 1 calc R U P . .
H7C H 0.9016 0.7955 0.3661 0.665 Uiso 0.5 1 calc R U P . .
C8 C 0.936(2) 0.7500 -0.074(2) 0.131(7) Uani 1 2 d S T P . .
H8A H 0.9920 0.7953 -0.0586 0.157 Uiso 0.5 1 calc R U P . .
H8B H 0.9920 0.7047 -0.0586 0.157 Uiso 0.5 1 calc R U P . .
C9 C 0.896(4) 0.7500 -0.216(2) 0.195(13) Uani 1 2 d S T P . .
H9A H 0.9743 0.7500 -0.2736 0.293 Uiso 1 2 calc R U P . .
H9B H 0.8429 0.7045 -0.2346 0.293 Uiso 0.5 1 calc R U P . .
H9C H 0.8429 0.7955 -0.2346 0.293 Uiso 0.5 1 calc R U P . .
N1 N 0.8489(16) 0.8976(6) 0.1139(11) 0.126(4) Uani 1 1 d . . . . .
S1 S 0.6252(4) 0.85421(16) -0.0052(4) 0.1259(13) Uani 1 1 d . . . . .
Sn1 Sn 0.78084(15) 0.7500 0.07372(10) 0.1078(7) Uani 1 2 d DS T P . .
```

```
loop_
  _atom_site_aniso_label
```



```

_atom_site_aniso_U_11
_atom_site_aniso_U_22
_atom_site_aniso_U_33
_atom_site_aniso_U_23
_atom_site_aniso_U_13
_atom_site_aniso_U_12
C1 0.150(11) 0.067(6) 0.101(8) 0.000(5) 0.020(7) -0.014(6)
C2 0.206(16) 0.058(6) 0.156(13) 0.000(7) 0.026(11) 0.014(8)
C3 0.23(2) 0.064(7) 0.168(15) -0.011(9) 0.060(14) -0.007(10)
C4 0.25(2) 0.093(9) 0.148(14) -0.027(9) -0.026(15) -0.013(12)
C5 0.25(2) 0.088(8) 0.141(11) -0.020(8) -0.048(13) -0.015(11)
C6 0.85(13) 0.15(3) 0.096(18) 0.000 -0.08(3) 0.000
C7 0.83(13) 0.28(6) 0.22(4) 0.000 -0.11(5) 0.000
C8 0.156(17) 0.075(9) 0.162(18) 0.000 -0.016(14) 0.000
C9 0.25(3) 0.23(3) 0.111(16) 0.000 0.06(2) 0.000
N1 0.190(11) 0.078(6) 0.109(7) 0.003(5) -0.023(8) 0.002(7)
S1 0.149(3) 0.0675(15) 0.162(3) 0.0009(17) 0.005(2) 0.0020(15)
Sn1 0.1816(15) 0.0640(7) 0.0778(7) 0.000 -0.0017(6) 0.000

```

\_geom\_special\_details

```

;
All esds (except the esd in the dihedral angle between two l.s.
planes)
are estimated using the full covariance matrix. The cell esds are
taken
into account individually in the estimation of esds in distances,
angles
and torsion angles; correlations between esds in cell parameters are
only
used when they are defined by crystal symmetry. An approximate
(isotropic)
treatment of cell esds is used for estimating esds involving l.s.
planes.
;

```

```

loop_
_geom_bond_atom_site_label_1
_geom_bond_atom_site_label_2
_geom_bond_distance
_geom_bond_site_symmetry_2
_geom_bond_publ_flag
C1 N1 1.295(19) . ?
C1 C2 1.424(19) . ?
C1 S1 1.753(14) . ?
C2 C3 1.37(3) . ?
C2 H1 0.9300 . ?
C3 C4 1.37(2) . ?
C3 H2 0.9300 . ?
C4 C5 1.35(2) . ?
C4 H3 0.9300 . ?
C5 N1 1.354(19) . ?
C5 H4 0.9300 . ?
C6 C7 1.44(2) . ?
C6 Sn1 2.19(3) . ?
C6 H6A 0.9700 . ?
C6 H6B 0.9700 . ?
C7 H7A 0.9600 . ?
C7 H7B 0.9600 . ?

```

C7 H7C 0.9600 . ?  
C8 C9 1.44(3) . ?  
C8 Sn1 2.11(2) . ?  
C8 H8A 0.9700 . ?  
C8 H8B 0.9700 . ?  
C9 H9A 0.9600 . ?  
C9 H9B 0.9600 . ?  
C9 H9C 0.9600 . ?  
N1 Sn1 2.661(10) . ?  
S1 Sn1 2.490(3) . ?  
Sn1 S1 2.490(4) 8\_575 ?

loop\_

\_geom\_angle\_atom\_site\_label\_1  
\_geom\_angle\_atom\_site\_label\_2  
\_geom\_angle\_atom\_site\_label\_3  
\_geom\_angle  
\_geom\_angle\_site\_symmetry\_1  
\_geom\_angle\_site\_symmetry\_3  
\_geom\_angle\_publ\_flag  
N1 C1 C2 121.2(14) . . ?  
N1 C1 S1 117.4(10) . . ?  
C2 C1 S1 121.4(13) . . ?  
C3 C2 C1 117.7(17) . . ?  
C3 C2 H1 121.1 . . ?  
C1 C2 H1 121.1 . . ?  
C4 C3 C2 120.1(14) . . ?  
C4 C3 H2 120.0 . . ?  
C2 C3 H2 120.0 . . ?  
C5 C4 C3 119.0(18) . . ?  
C5 C4 H3 120.5 . . ?  
C3 C4 H3 120.5 . . ?  
C4 C5 N1 122(2) . . ?  
C4 C5 H4 118.9 . . ?  
N1 C5 H4 118.9 . . ?  
C7 C6 Sn1 115(2) . . ?  
C7 C6 H6A 108.6 . . ?  
Sn1 C6 H6A 108.6 . . ?  
C7 C6 H6B 108.6 . . ?  
Sn1 C6 H6B 108.6 . . ?  
H6A C6 H6B 107.6 . . ?  
C6 C7 H7A 109.5 . . ?  
C6 C7 H7B 109.5 . . ?  
H7A C7 H7B 109.5 . . ?  
C6 C7 H7C 109.5 . . ?  
H7A C7 H7C 109.5 . . ?  
H7B C7 H7C 109.5 . . ?  
C9 C8 Sn1 117(2) . . ?  
C9 C8 H8A 108.1 . . ?  
Sn1 C8 H8A 108.1 . . ?  
C9 C8 H8B 108.1 . . ?  
Sn1 C8 H8B 108.1 . . ?  
H8A C8 H8B 107.3 . . ?  
C8 C9 H9A 109.5 . . ?  
C8 C9 H9B 109.5 . . ?  
H9A C9 H9B 109.5 . . ?  
C8 C9 H9C 109.5 . . ?  
H9A C9 H9C 109.5 . . ?

H9B C9 H9C 109.5 . . ?  
 C1 N1 C5 119.7(12) . . ?  
 C1 N1 Sn1 92.8(8) . . ?  
 C5 N1 Sn1 147.3(11) . . ?  
 C1 S1 Sn1 88.8(5) . . ?  
 C8 Sn1 C6 145.6(13) . . ?  
 C8 Sn1 S1 104.1(4) . 8\_575 ?  
 C6 Sn1 S1 99.5(8) . 8\_575 ?  
 C8 Sn1 S1 104.1(4) . . ?  
 C6 Sn1 S1 99.5(8) . . ?  
 S1 Sn1 S1 92.28(17) 8\_575 . ?  
 C8 Sn1 N1 85.1(4) . . ?  
 C6 Sn1 N1 84.9(4) . . ?  
 S1 Sn1 N1 153.2(3) 8\_575 . ?  
 S1 Sn1 N1 60.9(3) . . ?

loop\_

\_geom\_torsion\_atom\_site\_label\_1  
 \_geom\_torsion\_atom\_site\_label\_2  
 \_geom\_torsion\_atom\_site\_label\_3  
 \_geom\_torsion\_atom\_site\_label\_4  
 \_geom\_torsion  
 \_geom\_torsion\_site\_symmetry\_1  
 \_geom\_torsion\_site\_symmetry\_2  
 \_geom\_torsion\_site\_symmetry\_3  
 \_geom\_torsion\_site\_symmetry\_4  
 \_geom\_torsion\_publ\_flag  
 N1 C1 C2 C3 -4(2) . . . . ?  
 S1 C1 C2 C3 176.9(11) . . . . ?  
 C1 C2 C3 C4 3(3) . . . . ?  
 C2 C3 C4 C5 0(3) . . . . ?  
 C3 C4 C5 N1 -2(3) . . . . ?  
 C2 C1 N1 C5 2(2) . . . . ?  
 S1 C1 N1 C5 -178.8(11) . . . . ?  
 C2 C1 N1 Sn1 178.6(12) . . . . ?  
 S1 C1 N1 Sn1 -1.8(10) . . . . ?  
 C4 C5 N1 C1 1(3) . . . . ?  
 C4 C5 N1 Sn1 -173.1(14) . . . . ?  
 N1 C1 S1 Sn1 1.9(11) . . . . ?  
 C2 C1 S1 Sn1 -178.4(11) . . . . ?

\_refine\_diff\_density\_max 0.655  
 \_refine\_diff\_density\_min -1.412  
 \_refine\_diff\_density\_rms 0.138

\_shelxl\_version\_number 2014/6

\_shelx\_res\_file

;

TITL

CELL 1.54184 9.9262 17.2292 9.7256 90.000 90.000 90.000

ZERR 4.00 0.0013 0.0009 0.0008 0.000 0.000 0.000

LATT 1

SYMM 1/2 - X, - Y, 1/2 + Z

SYMM 1/2 + X, 1/2 - Y, 1/2 - Z

SYMM - X, 1/2 + Y, - Z

SFAC C H N S SN

UNIT 56 72 8 8 4

```

MERG      2
DFIX      1.480    0.020 C6 C7
DFIX      3.100    0.020 C7 SN1
DELU      C6 C7
SIMU      C6 C7
BOND N1 SN1
BIND N1 SN1
FMAP      2
PLAN      20
SIZE      0.050    0.100    0.100
ACTA
BOND      $H
CONF
LIST      4
WPDB     -2
L.S.     10
TEMP      25.00
WGHT      0.135100    0.826700
EXTI      0.003162
FVAR      4.74517
C1      1      0.738350    0.923163    0.059805    11.00000    0.14962
0.06674 =
          0.10053    0.00014    0.01988    -0.01396
C2      1      0.710305    1.004106    0.052735    11.00000    0.20631
0.05768 =
          0.15616    -0.00027    0.02629    0.01372
AFIX     43
H1      2      0.633144    1.022532    0.009416    11.00000    -1.20000
AFIX     0
C3      1      0.800781    1.053842    0.111866    11.00000    0.23295
0.06363 =
          0.16811    -0.01093    0.06026    -0.00711
AFIX     43
H2      2      0.783789    1.106923    0.112472    11.00000    -1.20000
AFIX     0
C4      1      0.915999    1.025616    0.169990    11.00000    0.25032
0.09263 =
          0.14801    -0.02687    -0.02591    -0.01295
AFIX     43
H3      2      0.977924    1.059091    0.210395    11.00000    -1.20000
AFIX     0
C5      1      0.938632    0.948406    0.167904    11.00000    0.25084
0.08843 =
          0.14089    -0.01995    -0.04829    -0.01493
AFIX     43
H4      2      1.018544    0.929417    0.204785    11.00000    -1.20000
AFIX     0
C6      1      0.732764    0.750000    0.293428    10.50000    0.85331
0.15067 =
          0.09616    0.00000    -0.07810    0.00000
AFIX     23
H6A     2      0.678528    0.795420    0.313650    10.50000    -1.20000
H6B     2      0.678528    0.704580    0.313650    10.50000    -1.20000
AFIX     0
C7      1      0.848319    0.750000    0.383197    10.50000    0.83337
0.27909 =
          0.21678    0.00000    -0.11068    0.00000
AFIX     33

```

|           |    |          |          |           |          |          |
|-----------|----|----------|----------|-----------|----------|----------|
| H7A       | 2  | 0.818745 | 0.750000 | 0.477178  | 10.50000 | -1.50000 |
| H7B       | 2  | 0.901584 | 0.704505 | 0.366099  | 10.50000 | -1.50000 |
| H7C       | 2  | 0.901584 | 0.795495 | 0.366099  | 10.50000 | -1.50000 |
| AFIX      | 0  |          |          |           |          |          |
| C8        | 1  | 0.936188 | 0.750000 | -0.074308 | 10.50000 | 0.15565  |
| 0.07549 = |    | 0.16236  | 0.00000  | -0.01621  | 0.00000  |          |
| AFIX      | 23 |          |          |           |          |          |
| H8A       | 2  | 0.992042 | 0.795344 | -0.058648 | 10.50000 | -1.20000 |
| H8B       | 2  | 0.992042 | 0.704656 | -0.058648 | 10.50000 | -1.20000 |
| AFIX      | 0  |          |          |           |          |          |
| C9        | 1  | 0.895734 | 0.750000 | -0.216010 | 10.50000 | 0.24612  |
| 0.22896 = |    | 0.11136  | 0.00000  | 0.05541   | 0.00000  |          |
| AFIX      | 33 |          |          |           |          |          |
| H9A       | 2  | 0.974258 | 0.750000 | -0.273633 | 10.50000 | -1.50000 |
| H9B       | 2  | 0.842945 | 0.704505 | -0.234582 | 10.50000 | -1.50000 |
| H9C       | 2  | 0.842945 | 0.795495 | -0.234582 | 10.50000 | -1.50000 |
| AFIX      | 0  |          |          |           |          |          |
| N1        | 3  | 0.848947 | 0.897639 | 0.113937  | 11.00000 | 0.19025  |
| 0.07761 = |    | 0.10889  | 0.00274  | -0.02287  | 0.00206  |          |
| S1        | 4  | 0.625181 | 0.854212 | -0.005242 | 11.00000 | 0.14867  |
| 0.06747 = |    | 0.16153  | 0.00093  | 0.00497   | 0.00196  |          |
| SN1       | 5  | 0.780835 | 0.750000 | 0.073716  | 10.50000 | 0.18164  |
| 0.06401 = |    | 0.07776  | 0.00000  | -0.00170  | 0.00000  |          |
| HKLF      | 4  |          |          |           |          |          |

REM  
 REM R1 = 0.0706 for 920 Fo > 4sig(Fo) and 0.1017 for all 1587 data  
 REM 95 parameters refined using 9 restraints

END

WGHT 0.1354 0.8259

REM Highest difference peak 0.655, deepest hole -1.412, 1-sigma level 0.138

|     |   |        |        |         |          |      |      |
|-----|---|--------|--------|---------|----------|------|------|
| Q1  | 1 | 0.6605 | 0.8009 | 0.0625  | 11.00000 | 0.05 | 0.65 |
| Q2  | 1 | 0.6915 | 0.8118 | 0.0681  | 11.00000 | 0.05 | 0.63 |
| Q3  | 1 | 0.7751 | 0.6936 | 0.0347  | 11.00000 | 0.05 | 0.61 |
| Q4  | 1 | 0.7752 | 0.7130 | -0.0468 | 11.00000 | 0.05 | 0.54 |
| Q5  | 1 | 0.8257 | 0.8258 | 0.0735  | 11.00000 | 0.05 | 0.54 |
| Q6  | 1 | 0.7351 | 0.7049 | 0.3805  | 11.00000 | 0.05 | 0.53 |
| Q7  | 1 | 0.6448 | 0.8999 | 0.0297  | 11.00000 | 0.05 | 0.49 |
| Q8  | 1 | 0.7855 | 0.7183 | 0.1980  | 11.00000 | 0.05 | 0.48 |
| Q9  | 1 | 0.8106 | 0.7500 | 0.2880  | 10.50000 | 0.05 | 0.48 |
| Q10 | 1 | 0.6828 | 0.7500 | -0.0207 | 10.50000 | 0.05 | 0.44 |
| Q11 | 1 | 0.8469 | 0.8563 | -0.0162 | 11.00000 | 0.05 | 0.42 |
| Q12 | 1 | 0.6407 | 0.8801 | 0.1221  | 11.00000 | 0.05 | 0.41 |
| Q13 | 1 | 0.7198 | 0.9502 | 0.0364  | 11.00000 | 0.05 | 0.40 |
| Q14 | 1 | 0.9257 | 0.7053 | 0.0222  | 11.00000 | 0.05 | 0.31 |
| Q15 | 1 | 0.6951 | 0.7500 | 0.1524  | 10.50000 | 0.05 | 0.31 |
| Q16 | 1 | 0.7834 | 0.8970 | -0.0209 | 11.00000 | 0.05 | 0.30 |
| Q17 | 1 | 0.8725 | 0.7059 | -0.0854 | 11.00000 | 0.05 | 0.27 |

|     |   |        |        |         |          |      |      |
|-----|---|--------|--------|---------|----------|------|------|
| Q18 | 1 | 0.7807 | 0.6660 | -0.1116 | 11.00000 | 0.05 | 0.26 |
| Q19 | 1 | 0.5250 | 0.7997 | -0.0497 | 11.00000 | 0.05 | 0.25 |
| Q20 | 1 | 0.7018 | 0.6978 | -0.2060 | 11.00000 | 0.05 | 0.25 |

;

\_shelx\_res\_checksum 68526

\_shelx\_hkl\_file

;

|    |     |   |          |         |   |
|----|-----|---|----------|---------|---|
| 0  | 2   | 0 | 225202.  | 1936.36 | 2 |
| 0  | 3   | 0 | -23.6433 | 79.4733 | 2 |
| 0  | 4   | 0 | 455303.  | 3723.84 | 2 |
| 0  | 5   | 0 | 17.5649  | 123.034 | 2 |
| 0  | 6   | 0 | 360848.  | 3420.97 | 4 |
| 0  | 6   | 0 | 378465.  | 3881.09 | 2 |
| 0  | 7   | 0 | -21.8037 | 151.788 | 4 |
| 0  | 8   | 0 | 368373.  | 3883.89 | 4 |
| 0  | 9   | 0 | 284.323  | 211.731 | 4 |
| 0  | -10 | 0 | 341266.  | 7779.07 | 5 |
| 0  | -11 | 0 | -491.132 | 487.024 | 5 |
| 0  | -12 | 0 | 126258.  | 5388.40 | 5 |
| 0  | -13 | 0 | -44.2985 | 669.482 | 5 |
| 0  | -14 | 0 | 15514.7  | 2057.25 | 5 |
| 0  | 15  | 0 | 256.871  | 293.264 | 8 |
| 0  | -15 | 0 | -37.9587 | 620.794 | 5 |
| 0  | 16  | 0 | 24654.4  | 1498.99 | 8 |
| 0  | 17  | 0 | 35.3423  | 267.284 | 8 |
| 0  | 18  | 0 | 24703.5  | 1469.89 | 8 |
| 0  | 19  | 0 | -131.735 | 259.166 | 8 |
| 0  | 20  | 0 | 29322.3  | 1333.23 | 8 |
| 1  | 0   | 0 | -4.15010 | 68.9305 | 1 |
| -1 | 0   | 0 | 67.8067  | 59.1461 | 1 |
| 1  | 1   | 0 | 47.1271  | 64.2942 | 1 |
| 1  | -1  | 0 | 29.5471  | 71.6367 | 1 |
| -1 | 1   | 0 | 23.0024  | 87.9735 | 1 |
| -1 | -1  | 0 | 92.5155  | 69.3383 | 1 |
| 1  | 2   | 0 | 179.671  | 97.1481 | 1 |
| 1  | -2  | 0 | 44.9507  | 71.5555 | 1 |
| -1 | -3  | 0 | 15.5072  | 101.601 | 2 |
| 1  | -3  | 0 | 112.375  | 84.1466 | 1 |
| -1 | -4  | 0 | 203.749  | 141.794 | 2 |
| 1  | -5  | 0 | -31.1980 | 221.501 | 5 |
| -1 | -5  | 0 | 29.1871  | 139.701 | 2 |
| 1  | -6  | 0 | 47.1958  | 310.305 | 5 |
| 1  | 6   | 0 | 326.888  | 117.921 | 4 |
| 1  | -7  | 0 | 15.8564  | 325.193 | 5 |
| 1  | 7   | 0 | 141.698  | 139.452 | 4 |
| 1  | 8   | 0 | 378.823  | 166.149 | 4 |
| 1  | -8  | 0 | -152.923 | 451.332 | 5 |
| 1  | -9  | 0 | -151.011 | 426.985 | 5 |
| 1  | -10 | 0 | 184.729  | 438.186 | 5 |
| -1 | 10  | 0 | -8.73041 | 201.951 | 4 |
| 1  | -11 | 0 | -282.020 | 506.248 | 5 |
| -1 | -12 | 0 | -551.151 | 546.660 | 5 |
| 1  | -12 | 0 | 300.426  | 570.908 | 5 |
| -1 | -13 | 0 | 601.755  | 515.034 | 5 |
| 1  | -13 | 0 | -115.445 | 693.830 | 5 |
| -1 | -14 | 0 | -436.147 | 567.516 | 5 |
| 1  | -14 | 0 | -6.40097 | 570.839 | 5 |

|    |     |   |          |         |   |
|----|-----|---|----------|---------|---|
| -1 | 15  | 0 | 279.522  | 380.176 | 8 |
| -1 | -15 | 0 | 173.218  | 873.970 | 5 |
| 1  | -15 | 0 | 646.755  | 1082.70 | 5 |
| 1  | 15  | 0 | -235.328 | 333.436 | 8 |
| 1  | 16  | 0 | 519.233  | 331.707 | 8 |
| -1 | 16  | 0 | -2.12952 | 302.047 | 8 |
| 1  | 17  | 0 | 184.804  | 285.135 | 8 |
| -1 | 17  | 0 | 441.566  | 332.792 | 8 |
| -1 | 18  | 0 | 127.971  | 256.085 | 8 |
| 1  | 18  | 0 | -174.191 | 256.044 | 8 |
| -1 | 19  | 0 | -57.6833 | 313.996 | 8 |
| 1  | 19  | 0 | 107.739  | 279.483 | 8 |
| 1  | 20  | 0 | 216.352  | 229.072 | 8 |
| 2  | 0   | 0 | 999999.  | 6443.00 | 1 |
| 2  | 1   | 0 | 30739.4  | 1151.01 | 1 |
| 2  | -1  | 0 | 30390.1  | 1129.80 | 1 |
| 2  | 2   | 0 | 291272.  | 3589.58 | 1 |
| 2  | -2  | 0 | 284278.  | 3494.90 | 1 |
| 2  | -3  | 0 | 228274.  | 3037.57 | 1 |
| 2  | 3   | 0 | 236978.  | 3146.48 | 1 |
| -2 | -4  | 0 | 320917.  | 4134.90 | 2 |
| 2  | -4  | 0 | 300629.  | 4663.38 | 5 |
| -2 | -5  | 0 | 320916.  | 4131.48 | 2 |
| 2  | -5  | 0 | 319743.  | 5337.64 | 5 |
| 2  | -6  | 0 | 301145.  | 5698.97 | 5 |
| -2 | -6  | 0 | 300591.  | 4303.53 | 2 |
| 2  | -7  | 0 | 160021.  | 4535.62 | 5 |
| 2  | -8  | 0 | 170582.  | 5137.52 | 5 |
| 2  | -9  | 0 | 4345.72  | 981.183 | 5 |
| 2  | -10 | 0 | 74609.9  | 3924.70 | 5 |
| 2  | -11 | 0 | 727.668  | 621.702 | 5 |
| 2  | -12 | 0 | 98796.5  | 5013.98 | 5 |
| 2  | -13 | 0 | 41678.8  | 3457.97 | 5 |
| 2  | 14  | 0 | 22525.2  | 1318.13 | 8 |
| -2 | -14 | 0 | 21398.5  | 2273.58 | 5 |
| 2  | -14 | 0 | 25651.4  | 2817.89 | 5 |
| 2  | 15  | 0 | 24044.5  | 1406.12 | 8 |
| 2  | 16  | 0 | 24980.3  | 1454.44 | 8 |
| 2  | 17  | 0 | 512.876  | 308.583 | 8 |
| 2  | 18  | 0 | 7023.54  | 763.346 | 8 |
| 2  | 19  | 0 | 90.7122  | 228.421 | 8 |
| 2  | 20  | 0 | 6337.51  | 602.820 | 8 |
| 3  | 0   | 0 | 40.3120  | 187.259 | 1 |
| 3  | 0   | 0 | 18.2886  | 190.299 | 5 |
| 3  | -1  | 0 | 139.615  | 207.335 | 1 |
| 3  | 1   | 0 | 62.0117  | 180.422 | 1 |
| 3  | 1   | 0 | 131.591  | 193.390 | 5 |
| 3  | -1  | 0 | 46.6202  | 160.133 | 5 |
| 3  | -2  | 0 | 286.737  | 248.252 | 5 |
| 3  | 2   | 0 | 42.2431  | 179.719 | 5 |
| 3  | -2  | 0 | -58.7256 | 159.027 | 1 |
| 3  | 2   | 0 | -11.8577 | 189.709 | 1 |
| 3  | -3  | 0 | -11.6347 | 221.837 | 5 |
| 3  | -4  | 0 | -122.327 | 256.076 | 5 |
| 3  | -5  | 0 | 205.031  | 303.688 | 5 |
| 3  | -6  | 0 | 2122.97  | 584.632 | 5 |
| 3  | -7  | 0 | -122.433 | 386.972 | 5 |
| 3  | -8  | 0 | 315.180  | 396.358 | 5 |

|   |     |   |          |         |    |
|---|-----|---|----------|---------|----|
| 3 | -9  | 0 | 301.616  | 411.198 | 5  |
| 3 | -10 | 0 | -673.120 | 531.106 | 5  |
| 3 | -11 | 0 | -102.599 | 598.771 | 5  |
| 3 | -12 | 0 | -313.564 | 601.789 | 5  |
| 3 | -13 | 0 | -1671.81 | 935.997 | 5  |
| 3 | 14  | 0 | 130.303  | 219.641 | 8  |
| 3 | -14 | 0 | -466.309 | 735.647 | 5  |
| 3 | 15  | 0 | -113.828 | 267.590 | 8  |
| 3 | 16  | 0 | -1.73285 | 248.822 | 8  |
| 3 | 17  | 0 | 45.9310  | 215.307 | 8  |
| 3 | 18  | 0 | -132.263 | 231.175 | 8  |
| 3 | 19  | 0 | -65.5531 | 171.250 | 8  |
| 3 | 20  | 0 | 128.099  | 175.314 | 8  |
| 4 | 0   | 0 | 6937.15  | 690.065 | 5  |
| 4 | -1  | 0 | 60690.0  | 2068.57 | 5  |
| 4 | 1   | 0 | 59664.2  | 1987.79 | 5  |
| 4 | 2   | 0 | 34403.8  | 1550.67 | 5  |
| 4 | -2  | 0 | 33279.0  | 1615.31 | 5  |
| 4 | -3  | 0 | 88144.8  | 2833.21 | 5  |
| 4 | 3   | 0 | 88214.2  | 2609.01 | 5  |
| 4 | -4  | 0 | 239497.  | 4990.05 | 5  |
| 4 | -5  | 0 | 21075.9  | 1588.38 | 5  |
| 4 | -6  | 0 | 142998.  | 4418.88 | 5  |
| 4 | -7  | 0 | 58988.3  | 3051.06 | 5  |
| 4 | -8  | 0 | 5317.44  | 1030.86 | 5  |
| 4 | -9  | 0 | 32570.9  | 2611.54 | 5  |
| 4 | -10 | 0 | 2977.47  | 942.377 | 5  |
| 4 | -11 | 0 | 6873.98  | 1409.90 | 5  |
| 4 | -12 | 0 | 25147.8  | 2676.26 | 5  |
| 4 | 13  | 0 | 23882.2  | 1383.58 | 12 |
| 4 | -13 | 0 | 27444.1  | 2784.05 | 5  |
| 4 | 14  | 0 | 16867.0  | 1097.13 | 8  |
| 4 | 14  | 0 | 16270.7  | 1181.02 | 12 |
| 4 | 15  | 0 | 2009.47  | 399.933 | 8  |
| 4 | 16  | 0 | 13668.2  | 979.075 | 8  |
| 4 | 17  | 0 | 2506.77  | 437.320 | 8  |
| 4 | 18  | 0 | 482.128  | 228.518 | 8  |
| 4 | -19 | 0 | 523.672  | 236.872 | 11 |
| 4 | 19  | 0 | 1303.95  | 281.604 | 8  |
| 5 | 0   | 0 | 194.528  | 279.148 | 5  |
| 5 | 1   | 0 | -35.8041 | 268.632 | 5  |
| 5 | -1  | 0 | 116.542  | 235.766 | 5  |
| 5 | -2  | 0 | -37.6211 | 274.777 | 5  |
| 5 | 2   | 0 | -67.1556 | 217.048 | 5  |
| 5 | 3   | 0 | 955.480  | 391.867 | 5  |
| 5 | -3  | 0 | 99.7533  | 210.585 | 5  |
| 5 | -4  | 0 | -568.826 | 366.981 | 5  |
| 5 | -5  | 0 | -40.7831 | 348.335 | 5  |
| 5 | -6  | 0 | 126.791  | 369.010 | 5  |
| 5 | -7  | 0 | 111.143  | 420.070 | 5  |
| 5 | -8  | 0 | -594.887 | 481.540 | 5  |
| 5 | -9  | 0 | 362.212  | 432.106 | 5  |
| 5 | -10 | 0 | 170.271  | 619.677 | 5  |
| 5 | -11 | 0 | 728.290  | 669.806 | 5  |
| 5 | 12  | 0 | 89.9546  | 212.720 | 12 |
| 5 | -12 | 0 | 746.023  | 567.451 | 5  |
| 5 | 13  | 0 | 359.427  | 303.588 | 12 |
| 5 | 13  | 0 | 66.0757  | 218.681 | 8  |



|   |     |           |         |         |    |
|---|-----|-----------|---------|---------|----|
| 5 | 14  | 0         | 272.773 | 236.575 | 12 |
| 5 | 14  | 0-49.4333 | 179.683 |         | 8  |
| 5 | 15  | 0-192.916 | 208.106 |         | 8  |
| 5 | 16  | 0-102.426 | 165.608 |         | 8  |
| 5 | -17 | 0         | 250.106 | 266.932 | 11 |
| 5 | 17  | 0         | 93.7071 | 167.202 | 8  |
| 5 | 18  | 0-10.2077 | 170.906 |         | 8  |
| 5 | -18 | 0-198.033 | 196.624 |         | 11 |
| 5 | -19 | 0-71.9157 | 144.763 |         | 11 |
| 6 | 0   | 0         | 9306.50 | 1018.15 | 5  |
| 6 | 1   | 0         | 68853.6 | 2734.28 | 5  |
| 6 | -1  | 0         | 67871.4 | 2761.97 | 5  |
| 6 | -2  | 0         | 1872.75 | 493.516 | 5  |
| 6 | 2   | 0         | 2923.67 | 618.182 | 5  |
| 6 | -3  | 0         | 28984.5 | 1946.73 | 5  |
| 6 | -4  | 0         | 9237.79 | 1178.20 | 5  |
| 6 | -5  | 0         | 1014.16 | 496.385 | 5  |
| 6 | -6  | 0         | 4218.73 | 930.124 | 5  |
| 6 | -7  | 0         | 12867.1 | 1585.92 | 5  |
| 6 | -8  | 0         | 1278.31 | 665.951 | 5  |
| 6 | -9  | 0         | 43051.1 | 3155.63 | 5  |
| 6 | -10 | 0         | 4274.03 | 1178.29 | 5  |
| 6 | -11 | 0         | 19370.5 | 2318.59 | 5  |
| 6 | 12  | 0         | 1944.21 | 398.243 | 12 |
| 6 | 13  | 0         | 1604.65 | 356.571 | 12 |
| 6 | -13 | 0-311.308 | 346.589 |         | 11 |
| 6 | -14 | 0-453.034 | 340.000 |         | 11 |
| 6 | -15 | 0-495.499 | 315.306 |         | 11 |
| 6 | -16 | 0-121.376 | 218.709 |         | 11 |
| 6 | -17 | 0         | 33.4737 | 165.830 | 11 |
| 7 | 0   | 0         | 68.7204 | 343.619 | 5  |
| 7 | 1   | 0         | 160.153 | 295.261 | 5  |
| 7 | -1  | 0         | 556.590 | 455.162 | 5  |
| 7 | 2   | 0         | 616.291 | 445.206 | 5  |
| 7 | -2  | 0         | 39.7053 | 796.562 | 5  |
| 7 | -3  | 0         | 328.676 | 423.044 | 5  |
| 7 | -4  | 0-83.9982 | 363.890 |         | 5  |
| 7 | -5  | 0-967.147 | 521.671 |         | 5  |
| 7 | -6  | 0         | 244.793 | 458.012 | 5  |
| 7 | -7  | 0-108.512 | 445.595 |         | 5  |
| 7 | -8  | 0         | 76.1504 | 229.618 | 11 |
| 7 | -8  | 0         | 256.457 | 627.288 | 5  |
| 7 | -9  | 0-39.7592 | 266.128 |         | 11 |
| 7 | -9  | 0         | 1101.61 | 838.194 | 5  |
| 7 | -10 | 0-2.13906 | 265.408 |         | 11 |
| 7 | -11 | 0         | 250.979 | 299.586 | 11 |
| 7 | -12 | 0         | 69.4948 | 272.866 | 11 |
| 7 | -13 | 0-190.522 | 266.981 |         | 11 |
| 7 | -14 | 0-446.938 | 276.569 |         | 11 |
| 7 | -15 | 0-171.976 | 216.704 |         | 11 |
| 7 | -16 | 0         | 24.9585 | 144.676 | 11 |
| 7 | -17 | 0         | 62.7877 | 123.058 | 11 |
| 8 | -1  | 0         | 3089.10 | 800.166 | 5  |
| 8 | -2  | 0         | 698.031 | 639.088 | 5  |
| 8 | -3  | 0         | 5653.14 | 1051.59 | 5  |
| 8 | -4  | 0         | 7241.88 | 594.503 | 6  |
| 8 | 4   | 0         | 7129.35 | 610.462 | 6  |
| 8 | -4  | 0         | 6239.33 | 1117.20 | 5  |

|    |     |   |          |         |    |
|----|-----|---|----------|---------|----|
| 8  | -5  | 0 | 3390.20  | 443.589 | 6  |
| 8  | -5  | 0 | 2726.91  | 950.348 | 5  |
| 8  | -6  | 0 | 1574.85  | 967.394 | 5  |
| 8  | -6  | 0 | -219.585 | 287.241 | 11 |
| 8  | -7  | 0 | 457.744  | 294.661 | 11 |
| 8  | -8  | 0 | -106.541 | 220.311 | 11 |
| 8  | -9  | 0 | 444.029  | 277.771 | 11 |
| 8  | -10 | 0 | 256.672  | 273.563 | 11 |
| 8  | -11 | 0 | -29.6019 | 239.391 | 11 |
| 8  | -12 | 0 | -381.361 | 252.426 | 11 |
| 8  | -13 | 0 | 285.957  | 215.605 | 11 |
| 8  | -14 | 0 | 389.865  | 208.154 | 11 |
| 8  | -15 | 0 | 302.356  | 167.430 | 11 |
| 9  | 0   | 0 | -61.8350 | 185.722 | 6  |
| 9  | 0   | 0 | -89.6686 | 214.970 | 11 |
| 9  | 1   | 0 | -44.7162 | 182.913 | 6  |
| 9  | -1  | 0 | 20.7954  | 193.378 | 6  |
| 9  | -1  | 0 | 522.946  | 271.840 | 11 |
| 9  | -2  | 0 | 1.20290  | 177.027 | 6  |
| 9  | 2   | 0 | 159.671  | 195.020 | 6  |
| 9  | -2  | 0 | -185.218 | 216.981 | 11 |
| 9  | -3  | 0 | 262.273  | 224.863 | 11 |
| 9  | 3   | 0 | -20.7815 | 229.759 | 6  |
| 9  | -3  | 0 | -47.0786 | 180.109 | 6  |
| 9  | -4  | 0 | -30.9306 | 193.064 | 11 |
| 9  | 4   | 0 | 19.1063  | 194.448 | 6  |
| 9  | -4  | 0 | -76.7448 | 212.525 | 6  |
| 9  | -5  | 0 | -320.274 | 232.430 | 6  |
| 9  | 5   | 0 | 72.5449  | 165.452 | 6  |
| 9  | -5  | 0 | 135.355  | 224.268 | 11 |
| 9  | -6  | 0 | -186.032 | 219.759 | 11 |
| 9  | -7  | 0 | 173.421  | 234.223 | 11 |
| 9  | -8  | 0 | -72.6896 | 202.059 | 11 |
| 9  | -9  | 0 | -44.8360 | 203.760 | 11 |
| 9  | -10 | 0 | -165.648 | 201.483 | 11 |
| 9  | -11 | 0 | 63.6232  | 177.607 | 11 |
| 9  | -12 | 0 | 32.5909  | 144.817 | 11 |
| 9  | -13 | 0 | 183.619  | 157.508 | 11 |
| 10 | 0   | 0 | 131.515  | 169.694 | 6  |
| 10 | -1  | 0 | -69.0866 | 192.929 | 11 |
| 10 | -1  | 0 | 103.085  | 176.838 | 6  |
| 10 | 1   | 0 | 145.322  | 178.373 | 6  |
| 10 | -2  | 0 | 176.409  | 181.321 | 6  |
| 10 | 2   | 0 | 169.373  | 184.432 | 6  |
| 10 | -2  | 0 | -262.631 | 230.006 | 11 |
| 10 | -3  | 0 | 471.187  | 235.009 | 6  |
| 10 | 3   | 0 | 362.451  | 225.970 | 6  |
| 10 | -3  | 0 | -238.408 | 227.093 | 11 |
| 10 | 4   | 0 | 383.074  | 227.047 | 6  |
| 10 | -4  | 0 | 157.509  | 202.025 | 11 |
| 10 | -4  | 0 | 591.151  | 248.244 | 6  |
| 10 | 5   | 0 | 704.665  | 238.414 | 6  |
| 10 | -5  | 0 | 1002.93  | 273.346 | 6  |
| 10 | -6  | 0 | -22.0829 | 175.830 | 11 |
| 10 | -7  | 0 | 107.987  | 187.242 | 11 |
| 10 | -8  | 0 | 164.733  | 187.571 | 11 |
| 10 | -9  | 0 | -73.6779 | 163.135 | 11 |
| 10 | -10 | 0 | 32.2795  | 146.077 | 11 |

|    |     |            |         |    |
|----|-----|------------|---------|----|
| 10 | -11 | 0-20.3996  | 136.999 | 11 |
| 11 | 0   | 0-247.844  | 192.925 | 6  |
| 11 | 1   | 0-1.06289  | 179.378 | 6  |
| 11 | -1  | 0 86.8458  | 164.641 | 6  |
| 11 | -2  | 0 202.448  | 173.578 | 6  |
| 11 | 2   | 0-280.415  | 198.765 | 6  |
| 11 | -5  | 0 239.330  | 192.470 | 11 |
| 11 | -6  | 0 144.165  | 179.965 | 11 |
| 11 | -7  | 0 63.6410  | 210.303 | 11 |
| 0  | 0   | 1 49.0888  | 82.4298 | 2  |
| 0  | 1   | 1 189156.  | 2495.19 | 2  |
| 0  | -1  | 1 207111.  | 1724.96 | 2  |
| 0  | 2   | 1 162.297  | 136.763 | 2  |
| 0  | 3   | 1 42104.1  | 1470.84 | 2  |
| 0  | 4   | 1-31.9024  | 164.129 | 2  |
| 0  | 5   | -1 65637.5 | 1435.72 | 4  |
| 0  | 5   | 1 56247.8  | 1942.75 | 2  |
| 0  | 6   | -1 76.5735 | 128.165 | 4  |
| 0  | 6   | 1-27.6279  | 210.327 | 2  |
| 0  | 7   | -1 137531. | 2387.70 | 4  |
| 0  | -7  | -1 148984. | 3747.88 | 5  |
| 0  | 8   | -1-75.7476 | 141.721 | 4  |
| 0  | -8  | -1 279.383 | 296.909 | 5  |
| 0  | -9  | -1 6616.02 | 983.875 | 5  |
| 0  | 9   | -1 8535.44 | 704.868 | 4  |
| 0  | 10  | -1 66.7898 | 172.784 | 4  |
| 0  | -10 | -1 160.744 | 349.496 | 5  |
| 0  | 11  | -1 35075.5 | 1532.90 | 4  |
| 0  | -11 | -1 33533.1 | 2452.36 | 5  |
| 0  | -11 | 1 29442.4  | 2540.90 | 5  |
| 0  | -12 | -1 190.282 | 508.673 | 5  |
| 0  | -12 | 1 5.60627  | 706.057 | 5  |
| 0  | -13 | -1 16253.1 | 1914.04 | 5  |
| 0  | -13 | 1 14460.4  | 2013.16 | 5  |
| 0  | -14 | 1-70.5251  | 629.432 | 5  |
| 0  | -14 | -1-358.292 | 635.242 | 5  |
| 0  | -15 | -1 8638.65 | 1557.68 | 5  |
| 0  | -15 | 1 9745.65  | 1926.27 | 5  |
| 0  | 15  | -1 10136.2 | 973.827 | 8  |
| 0  | 15  | 1 10666.6  | 992.887 | 8  |
| 0  | 16  | -1-71.2430 | 278.157 | 8  |
| 0  | 16  | 1-158.683  | 343.714 | 8  |
| 0  | 17  | 1 2743.16  | 555.101 | 8  |
| 0  | 17  | -1 3995.12 | 632.098 | 8  |
| 0  | 18  | 1-153.878  | 300.992 | 8  |
| 0  | 18  | -1-118.127 | 259.032 | 8  |
| 0  | 19  | -1 3197.01 | 541.312 | 8  |
| 0  | 19  | 1 2426.72  | 489.661 | 8  |
| 0  | 20  | -1-188.054 | 255.084 | 8  |
| 0  | 20  | 1 531.398  | 269.797 | 8  |
| -1 | 0   | -1 14924.1 | 680.318 | 2  |
| -1 | -1  | -1 862202. | 5481.42 | 2  |
| 1  | 2   | 1 386.265  | 196.689 | 2  |
| -1 | -2  | -1 383.873 | 189.724 | 2  |
| -1 | -3  | -1 131476. | 2552.23 | 2  |
| 1  | 3   | 1 118550.  | 2549.93 | 2  |
| -1 | -4  | 1 155793.  | 1765.66 | 2  |
| -1 | -4  | -1 158736. | 3085.89 | 2  |

|    |     |    |         |         |   |
|----|-----|----|---------|---------|---|
| -1 | -5  | 1  | 66326.2 | 1187.09 | 2 |
| -1 | 5   | -1 | 71004.7 | 1470.98 | 1 |
| 1  | -5  | -1 | 65691.1 | 2064.37 | 5 |
| 1  | 5   | -1 | 59241.1 | 1320.67 | 4 |
| 1  | 5   | 1  | 62129.2 | 2071.83 | 2 |
| -1 | -5  | -1 | 69008.7 | 1439.30 | 1 |
| 1  | 6   | -1 | 140602. | 2212.24 | 4 |
| 1  | 6   | 1  | 138089. | 3260.45 | 2 |
| 1  | -7  | -1 | 336782. | 5755.84 | 5 |
| 1  | 7   | -1 | 320823. | 3617.29 | 4 |
| 1  | -8  | -1 | 674.815 | 382.964 | 5 |
| 1  | -8  | 1  | 453.095 | 464.214 | 5 |
| 1  | 8   | -1 | 742.496 | 230.292 | 4 |
| 1  | -9  | 1  | 169217. | 5582.20 | 5 |
| 1  | 9   | -1 | 179893. | 3028.92 | 4 |
| 1  | -9  | -1 | 175202. | 4993.32 | 5 |
| -1 | 9   | -1 | 183834. | 3362.28 | 4 |
| 1  | -10 | -1 | 904.043 | 517.515 | 5 |
| 1  | 10  | -1 | 1045.48 | 272.071 | 4 |
| -1 | 10  | -1 | 939.211 | 280.904 | 4 |
| 1  | -10 | 1  | 571.978 | 516.608 | 5 |
| -1 | -11 | -1 | 152475. | 5127.14 | 5 |
| 1  | -11 | 1  | 159476. | 6181.10 | 5 |
| -1 | 11  | -1 | 171916. | 3471.81 | 4 |
| 1  | -11 | -1 | 163701. | 5567.14 | 5 |
| 1  | 11  | -1 | 161804. | 3052.79 | 4 |
| 1  | -12 | 1  | 1065.03 | 693.796 | 5 |
| 1  | -12 | -1 | 922.117 | 571.402 | 5 |
| -1 | -12 | -1 | 681.463 | 592.368 | 5 |
| -1 | 12  | -1 | 965.502 | 364.195 | 4 |
| -1 | -13 | 1  | 34701.6 | 2974.11 | 5 |
| 1  | -13 | 1  | 37315.3 | 3290.53 | 5 |
| 1  | -13 | -1 | 36198.8 | 2904.34 | 5 |
| -1 | -13 | -1 | 36572.4 | 2759.94 | 5 |
| -1 | -14 | -1 | 19712.5 | 2061.11 | 5 |
| 1  | 14  | 1  | 22960.9 | 1368.30 | 8 |
| 1  | -14 | -1 | 23225.4 | 2450.32 | 5 |
| -1 | -14 | 1  | 20579.7 | 2425.30 | 5 |
| 1  | -14 | 1  | 20862.9 | 2540.96 | 5 |
| -1 | 15  | 1  | 9367.29 | 952.207 | 8 |
| 1  | 15  | 1  | 8561.53 | 878.376 | 8 |
| 1  | 15  | -1 | 8075.31 | 861.496 | 8 |
| -1 | 15  | -1 | 8247.40 | 891.476 | 8 |
| -1 | 16  | 1  | 2302.59 | 557.160 | 8 |
| 1  | 16  | 1  | 2230.96 | 515.225 | 8 |
| -1 | 16  | -1 | 2834.64 | 556.348 | 8 |
| 1  | 16  | -1 | 2157.42 | 500.207 | 8 |
| 1  | 17  | 1  | 17934.1 | 1276.05 | 8 |
| -1 | 17  | 1  | 20041.6 | 1404.87 | 8 |
| 1  | 17  | -1 | 17441.7 | 1227.04 | 8 |
| 1  | 18  | 1  | 174.299 | 285.526 | 8 |
| 1  | 18  | -1 | 209.139 | 247.070 | 8 |
| -1 | 18  | 1  | 227.712 | 336.886 | 8 |
| 1  | 19  | 1  | 17575.2 | 1160.40 | 8 |
| -1 | 19  | 1  | 21423.3 | 1301.12 | 8 |
| 1  | 19  | -1 | 18246.9 | 1133.65 | 8 |
| -1 | 20  | 1  | 192.468 | 278.598 | 8 |
| 1  | 20  | -1 | 265.205 | 227.097 | 8 |

|    |     |    |          |         |    |
|----|-----|----|----------|---------|----|
| 1  | 20  | 1  | 295.641  | 259.555 | 8  |
| -2 | 0   | -1 | 131188.  | 2539.24 | 1  |
| -2 | 1   | -1 | 172386.  | 2933.44 | 1  |
| -2 | -1  | -1 | 177738.  | 2951.46 | 1  |
| -2 | 2   | -1 | 28454.4  | 1221.93 | 1  |
| -2 | -2  | -1 | 28859.3  | 1224.88 | 1  |
| 2  | -3  | -1 | 182437.  | 3123.80 | 5  |
| -2 | -3  | -1 | 166587.  | 2974.96 | 1  |
| -2 | 3   | -1 | 170755.  | 3020.75 | 1  |
| -2 | -3  | -1 | 179147.  | 3295.03 | 2  |
| -2 | -4  | -1 | 2037.90  | 350.002 | 1  |
| 2  | -4  | 1  | 1563.72  | 406.562 | 5  |
| -2 | 4   | -1 | 1820.08  | 352.769 | 1  |
| 2  | 4   | -1 | 2048.92  | 341.779 | 1  |
| -2 | -4  | -1 | 1863.84  | 391.871 | 2  |
| 2  | -4  | -1 | 2060.30  | 411.837 | 5  |
| 2  | -4  | -1 | 1965.36  | 332.589 | 1  |
| -2 | -5  | -1 | 65797.6  | 2182.13 | 2  |
| -2 | -5  | -1 | 65992.5  | 1820.40 | 1  |
| 2  | -5  | -1 | 70936.7  | 1813.88 | 1  |
| -2 | -5  | 1  | 69157.9  | 1774.59 | 2  |
| 2  | -5  | -1 | 66453.6  | 2272.76 | 5  |
| -2 | 5   | -1 | 69566.8  | 1918.04 | 1  |
| 2  | -5  | 1  | 61308.6  | 2524.97 | 5  |
| 2  | 5   | -1 | 68303.1  | 1789.82 | 1  |
| 2  | -6  | -1 | 12729.3  | 1117.57 | 5  |
| 2  | -6  | 1  | 12657.9  | 1296.24 | 5  |
| 2  | -7  | 1  | 84606.8  | 3559.67 | 5  |
| 2  | -7  | -1 | 82774.7  | 3044.46 | 5  |
| 2  | -8  | 1  | 1680.14  | 683.883 | 5  |
| 2  | -8  | -1 | 1462.52  | 515.312 | 5  |
| 2  | -9  | 1  | 30782.7  | 2509.66 | 5  |
| 2  | -9  | -1 | 28018.3  | 2090.88 | 5  |
| 2  | -10 | -1 | 5442.30  | 1037.74 | 5  |
| 2  | -10 | 1  | 4308.25  | 1089.79 | 5  |
| -2 | 11  | -1 | 16757.7  | 1196.60 | 4  |
| 2  | -11 | -1 | 14742.3  | 1795.59 | 5  |
| 2  | -11 | 1  | 14813.0  | 2058.78 | 5  |
| -2 | 12  | -1 | 27.8477  | 232.286 | 4  |
| 2  | -12 | -1 | 302.963  | 506.460 | 5  |
| -2 | -12 | -1 | 294.715  | 446.518 | 5  |
| 2  | -12 | 1  | -509.184 | 750.570 | 5  |
| 2  | -13 | 1  | 19167.0  | 2394.10 | 5  |
| 2  | -13 | -1 | 20718.4  | 2303.03 | 5  |
| -2 | 13  | -1 | 22993.5  | 1443.83 | 4  |
| 2  | -14 | -1 | 3967.35  | 1256.09 | 5  |
| 2  | 14  | -1 | 3298.14  | 566.397 | 12 |
| 2  | -14 | 1  | 4903.80  | 1437.30 | 5  |
| 2  | 14  | 1  | 3173.31  | 516.296 | 8  |
| 2  | 15  | 1  | 3702.84  | 590.175 | 8  |
| 2  | 16  | 1  | 251.053  | 266.867 | 8  |
| 2  | 16  | -1 | 427.809  | 316.548 | 8  |
| 2  | 17  | -1 | 3331.65  | 555.444 | 8  |
| 2  | 17  | 1  | 3809.47  | 596.882 | 8  |
| 2  | 18  | -1 | 83.8676  | 213.645 | 8  |
| 2  | 18  | 1  | 122.915  | 208.690 | 8  |
| 2  | 19  | 1  | 1486.87  | 364.432 | 8  |
| 2  | 19  | -1 | 1628.76  | 380.461 | 8  |

|    |     |    |         |         |    |
|----|-----|----|---------|---------|----|
| 2  | 20  | -1 | 546.901 | 256.609 | 8  |
| 2  | 20  | 1  | 294.290 | 237.873 | 8  |
| 3  | 0   | -1 | 653.734 | 230.119 | 5  |
| 3  | 0   | -1 | 718.334 | 252.540 | 1  |
| -3 | 0   | -1 | 812.538 | 349.644 | 1  |
| 3  | -1  | -1 | 19165.2 | 1050.45 | 5  |
| 3  | 1   | -1 | 19129.2 | 1053.60 | 5  |
| 3  | 1   | -1 | 20374.4 | 1190.10 | 1  |
| 3  | -1  | -1 | 20075.3 | 1177.51 | 1  |
| -3 | -1  | -1 | 17324.6 | 1136.82 | 1  |
| -3 | 1   | -1 | 18953.6 | 1199.76 | 1  |
| 3  | -2  | -1 | 48863.9 | 1832.24 | 1  |
| -3 | -2  | -1 | 43131.6 | 1791.95 | 1  |
| 3  | 2   | -1 | 49247.6 | 1856.27 | 1  |
| 3  | 2   | -1 | 44553.5 | 1675.26 | 5  |
| -3 | 2   | -1 | 44679.8 | 1846.02 | 1  |
| 3  | -2  | 1  | 48512.3 | 1682.92 | 5  |
| 3  | -2  | -1 | 47494.2 | 1735.51 | 5  |
| 3  | -3  | -1 | 169639. | 3444.47 | 1  |
| 3  | 3   | -1 | 159433. | 3404.41 | 5  |
| 3  | 3   | -1 | 174063. | 3511.39 | 1  |
| -3 | 3   | -1 | 155901. | 3483.68 | 1  |
| 3  | -3  | -1 | 158882. | 3339.88 | 5  |
| 3  | -3  | 1  | 158902. | 3442.54 | 5  |
| -3 | -3  | -1 | 153630. | 3419.40 | 1  |
| 3  | -4  | 1  | 71164.7 | 2630.11 | 5  |
| -3 | 4   | -1 | 72822.3 | 2382.19 | 1  |
| -3 | -4  | -1 | 71574.4 | 2327.46 | 1  |
| 3  | -4  | -1 | 78466.0 | 2326.79 | 1  |
| 3  | 4   | -1 | 78022.2 | 2363.96 | 1  |
| 3  | -4  | -1 | 70763.9 | 2356.60 | 5  |
| 3  | -5  | 1  | 244113. | 5393.46 | 5  |
| 3  | -5  | -1 | 245488. | 4740.14 | 5  |
| 3  | -6  | -1 | 159010. | 4100.82 | 5  |
| 3  | -6  | 1  | 165531. | 4899.95 | 5  |
| 3  | -7  | -1 | 85709.4 | 3285.47 | 5  |
| 3  | -7  | 1  | 87120.1 | 3857.41 | 5  |
| 3  | -8  | -1 | 5302.04 | 926.474 | 5  |
| 3  | -8  | 1  | 4979.10 | 1081.31 | 5  |
| 3  | -9  | -1 | 8329.42 | 1205.35 | 5  |
| 3  | -9  | 1  | 8191.34 | 1413.96 | 5  |
| 3  | -10 | -1 | 1397.87 | 590.690 | 5  |
| 3  | -10 | 1  | 1073.63 | 670.928 | 5  |
| 3  | -11 | -1 | 21320.5 | 2160.62 | 5  |
| 3  | -11 | 1  | 20993.2 | 2501.59 | 5  |
| 3  | -12 | 1  | 5294.85 | 1404.45 | 5  |
| -3 | 12  | -1 | 6208.30 | 848.382 | 4  |
| 3  | -12 | -1 | 5706.78 | 1291.60 | 5  |
| 3  | -13 | 1  | 42367.0 | 3716.74 | 5  |
| -3 | 13  | -1 | 48502.8 | 2177.43 | 4  |
| 3  | -13 | -1 | 43382.1 | 3309.18 | 5  |
| 3  | -14 | -1 | 29592.9 | 2859.99 | 5  |
| 3  | -14 | 1  | 31703.8 | 3197.25 | 5  |
| 3  | 14  | 1  | 29874.8 | 1490.29 | 8  |
| 3  | 14  | -1 | 30342.7 | 1678.05 | 12 |
| 3  | 15  | 1  | 18384.1 | 1209.54 | 8  |
| 3  | 15  | -1 | 18950.7 | 1342.11 | 12 |
| 3  | 16  | -1 | 3455.88 | 560.540 | 8  |

|    |     |    |          |         |    |
|----|-----|----|----------|---------|----|
| 3  | 16  | 1  | 4020.63  | 588.544 | 8  |
| 3  | 17  | -1 | 6250.31  | 697.324 | 8  |
| 3  | 17  | 1  | 7368.48  | 766.998 | 8  |
| 3  | 18  | 1  | 186.848  | 227.840 | 8  |
| 3  | 18  | -1 | 277.613  | 223.330 | 8  |
| 3  | 19  | -1 | 1019.67  | 288.728 | 8  |
| 3  | 19  | 1  | 939.113  | 286.815 | 8  |
| 3  | 20  | -1 | 329.333  | 203.740 | 8  |
| 3  | 20  | 1  | 201.523  | 173.226 | 8  |
| 4  | 0   | 1  | 18139.5  | 1015.06 | 5  |
| 4  | 0   | -1 | 19196.3  | 1218.15 | 5  |
| 4  | -1  | -1 | 25738.4  | 1413.98 | 5  |
| 4  | 1   | -1 | 26024.3  | 1415.41 | 5  |
| 4  | -1  | 1  | 25178.9  | 1240.28 | 5  |
| 4  | 1   | 1  | 25623.9  | 1185.66 | 5  |
| 4  | 2   | -1 | 52887.9  | 2072.51 | 5  |
| 4  | 2   | 1  | 53280.8  | 1747.89 | 5  |
| 4  | -2  | -1 | 52876.5  | 2081.55 | 5  |
| 4  | -2  | 1  | 54340.9  | 1989.96 | 5  |
| 4  | -3  | 1  | 28325.5  | 1572.57 | 5  |
| 4  | 3   | -1 | 28840.1  | 1614.44 | 5  |
| 4  | -3  | -1 | 27692.4  | 1593.93 | 5  |
| 4  | -4  | -1 | 5160.17  | 739.107 | 5  |
| 4  | -4  | 1  | 4436.00  | 731.533 | 5  |
| 4  | -5  | -1 | 20965.5  | 1536.49 | 5  |
| 4  | -5  | 1  | 19134.7  | 1559.23 | 5  |
| 4  | -6  | -1 | 28583.5  | 1899.36 | 5  |
| 4  | -6  | 1  | 28262.8  | 2079.55 | 5  |
| 4  | -7  | 1  | 4827.57  | 1024.67 | 5  |
| 4  | -7  | -1 | 4864.06  | 860.337 | 5  |
| 4  | -8  | -1 | 10101.1  | 1303.97 | 5  |
| 4  | -8  | 1  | 9427.40  | 1459.29 | 5  |
| 4  | -9  | 1  | 8176.15  | 1436.10 | 5  |
| 4  | -9  | -1 | 8877.64  | 1311.85 | 5  |
| 4  | -10 | 1  | 5570.03  | 1199.29 | 5  |
| 4  | -10 | -1 | 5555.15  | 1124.37 | 5  |
| 4  | -11 | -1 | 6570.18  | 1315.48 | 5  |
| 4  | -11 | 1  | 8280.38  | 1646.36 | 5  |
| 4  | -12 | 1  | 3738.04  | 1111.06 | 5  |
| 4  | -12 | -1 | 3644.58  | 1033.23 | 5  |
| 4  | -13 | -1 | 2001.58  | 809.039 | 5  |
| 4  | -13 | 1  | 1419.12  | 778.009 | 5  |
| -4 | 13  | -1 | 3076.00  | 659.836 | 4  |
| 4  | 13  | -1 | 1550.08  | 417.208 | 12 |
| 4  | 13  | 1  | 2328.71  | 455.496 | 8  |
| 4  | 14  | -1 | 2954.34  | 560.807 | 12 |
| 4  | 14  | 1  | 2753.91  | 481.285 | 8  |
| 4  | 15  | -1 | 642.834  | 304.914 | 12 |
| 4  | 15  | -1 | 623.114  | 281.261 | 8  |
| 4  | 15  | 1  | 635.920  | 301.553 | 8  |
| 4  | 16  | -1 | 425.763  | 261.408 | 8  |
| 4  | 16  | 1  | 498.648  | 262.604 | 8  |
| 4  | 17  | -1 | 1118.70  | 342.489 | 8  |
| 4  | 17  | 1  | 1110.82  | 326.783 | 8  |
| 4  | 18  | -1 | 186.155  | 215.437 | 8  |
| 4  | 18  | 1  | 259.883  | 197.035 | 8  |
| 4  | -19 | -1 | -68.7386 | 159.137 | 11 |
| 4  | 19  | -1 | 458.535  | 182.350 | 8  |

|   |     |    |          |         |    |
|---|-----|----|----------|---------|----|
| 4 | 19  | 1  | 528.170  | 217.905 | 8  |
| 5 | 0   | -1 | 77714.6  | 2752.95 | 5  |
| 5 | 0   | 1  | 80813.5  | 2416.63 | 5  |
| 5 | -1  | 1  | 3384.15  | 553.171 | 5  |
| 5 | 1   | -1 | 3277.23  | 603.682 | 5  |
| 5 | 1   | 1  | 3302.80  | 521.282 | 5  |
| 5 | -1  | -1 | 3182.87  | 587.951 | 5  |
| 5 | 2   | -1 | 74999.9  | 2769.82 | 5  |
| 5 | -2  | -1 | 74794.0  | 2795.34 | 5  |
| 5 | -2  | 1  | 74559.4  | 2558.93 | 5  |
| 5 | 2   | 1  | 72397.8  | 2335.99 | 5  |
| 5 | 3   | -1 | 36700.3  | 2012.84 | 5  |
| 5 | -3  | -1 | 35996.8  | 2009.89 | 5  |
| 5 | -3  | 1  | 36234.7  | 1910.21 | 5  |
| 5 | -4  | 1  | 2929.35  | 651.869 | 5  |
| 5 | -4  | -1 | 2440.29  | 586.345 | 5  |
| 5 | -5  | 1  | 78990.4  | 3327.26 | 5  |
| 5 | -5  | -1 | 78426.2  | 3244.01 | 5  |
| 5 | -6  | -1 | 15056.4  | 1507.02 | 5  |
| 5 | -6  | 1  | 15571.4  | 1611.77 | 5  |
| 5 | -7  | -1 | 12416.8  | 1434.05 | 5  |
| 5 | -7  | 1  | 12187.0  | 1547.66 | 5  |
| 5 | -8  | -1 | 25142.1  | 2157.01 | 5  |
| 5 | -8  | 1  | 22561.7  | 2188.28 | 5  |
| 5 | -9  | 1  | 538.327  | 648.696 | 5  |
| 5 | -9  | -1 | -98.0580 | 512.070 | 5  |
| 5 | -10 | -1 | 44700.2  | 3120.59 | 5  |
| 5 | -10 | 1  | 45669.4  | 3445.11 | 5  |
| 5 | -11 | 1  | 7061.76  | 1529.81 | 5  |
| 5 | -11 | -1 | 8639.68  | 1517.30 | 5  |
| 5 | -12 | -1 | 5470.32  | 1246.17 | 5  |
| 5 | -12 | 1  | 5351.73  | 1299.90 | 5  |
| 5 | 12  | -1 | 4357.75  | 629.745 | 12 |
| 5 | 13  | -1 | 5258.09  | 679.257 | 12 |
| 5 | 14  | 1  | 1918.86  | 394.850 | 8  |
| 5 | 14  | -1 | 1555.50  | 403.890 | 12 |
| 5 | 15  | 1  | 6610.02  | 665.880 | 8  |
| 5 | 15  | -1 | 5765.64  | 695.110 | 12 |
| 5 | 15  | -1 | 5252.53  | 599.068 | 8  |
| 5 | 16  | 1  | 918.850  | 286.686 | 8  |
| 5 | -16 | -1 | 533.153  | 311.574 | 11 |
| 5 | 16  | -1 | 967.050  | 305.140 | 8  |
| 5 | 17  | 1  | 1888.95  | 345.487 | 8  |
| 5 | 17  | -1 | 1319.51  | 313.620 | 8  |
| 5 | -18 | 1  | 95.7171  | 191.834 | 11 |
| 5 | 18  | 1  | 1946.81  | 331.143 | 8  |
| 5 | -18 | -1 | 198.205  | 194.112 | 11 |
| 5 | 18  | -1 | 2190.10  | 340.014 | 8  |
| 5 | -19 | 1  | -26.8073 | 177.351 | 11 |
| 6 | 0   | -1 | 5019.28  | 818.726 | 5  |
| 6 | -1  | -1 | 142.475  | 267.253 | 5  |
| 6 | 1   | -1 | 545.618  | 362.742 | 5  |
| 6 | -1  | 1  | 249.665  | 330.294 | 5  |
| 6 | 2   | -1 | 4969.84  | 829.730 | 5  |
| 6 | -2  | 1  | 4024.91  | 677.983 | 5  |
| 6 | -2  | -1 | 4810.04  | 842.431 | 5  |
| 6 | -3  | 1  | 386.327  | 413.558 | 5  |
| 6 | -3  | -1 | -21.5155 | 364.451 | 5  |



|   |     |    |          |         |    |
|---|-----|----|----------|---------|----|
| 6 | -4  | -1 | 7155.11  | 1055.87 | 5  |
| 6 | -4  | 1  | 6517.75  | 967.517 | 5  |
| 6 | -5  | 1  | 428.618  | 375.646 | 5  |
| 6 | -5  | -1 | 581.303  | 300.026 | 5  |
| 6 | -6  | 1  | 3644.77  | 871.474 | 5  |
| 6 | -6  | -1 | 4782.32  | 946.377 | 5  |
| 6 | -7  | 1  | 44.7784  | 458.922 | 5  |
| 6 | -7  | -1 | 340.012  | 508.088 | 5  |
| 6 | -8  | -1 | 1078.63  | 571.565 | 5  |
| 6 | -8  | 1  | 1678.58  | 756.023 | 5  |
| 6 | -9  | 1  | -259.809 | 543.739 | 5  |
| 6 | -9  | -1 | 225.168  | 435.314 | 5  |
| 6 | -10 | -1 | 4080.98  | 1009.46 | 5  |
| 6 | -10 | 1  | 3592.32  | 1132.69 | 5  |
| 6 | 10  | -1 | 3054.11  | 535.072 | 12 |
| 6 | -11 | 1  | 1034.34  | 1085.40 | 5  |
| 6 | -11 | -1 | 534.259  | 345.191 | 11 |
| 6 | 11  | -1 | 735.300  | 325.964 | 12 |
| 6 | 12  | -1 | 494.207  | 257.334 | 12 |
| 6 | -12 | -1 | -170.579 | 310.489 | 11 |
| 6 | 13  | -1 | 169.714  | 227.252 | 12 |
| 6 | -13 | -1 | -289.568 | 310.876 | 11 |
| 6 | -14 | 1  | -170.412 | 315.529 | 11 |
| 6 | -14 | -1 | -103.534 | 258.183 | 11 |
| 6 | 14  | -1 | 630.728  | 288.690 | 12 |
| 6 | -15 | 1  | -1.90240 | 222.709 | 11 |
| 6 | 15  | -1 | 248.699  | 175.128 | 8  |
| 6 | -15 | -1 | -198.788 | 253.752 | 11 |
| 6 | 16  | -1 | 381.640  | 230.435 | 8  |
| 6 | -16 | -1 | -38.2197 | 201.913 | 11 |
| 6 | -16 | 1  | -296.164 | 249.865 | 11 |
| 6 | 17  | -1 | -87.6521 | 170.977 | 8  |
| 6 | -17 | -1 | -41.3177 | 158.811 | 11 |
| 6 | -17 | 1  | 14.0143  | 164.327 | 11 |
| 6 | -18 | 1  | 34.5390  | 123.483 | 11 |
| 6 | -18 | -1 | -355.876 | 182.164 | 11 |
| 7 | 0   | -1 | 20569.4  | 1795.93 | 5  |
| 7 | 1   | -1 | 2658.81  | 666.240 | 5  |
| 7 | -1  | -1 | 3353.47  | 752.486 | 5  |
| 7 | -2  | -1 | 17142.9  | 1682.76 | 5  |
| 7 | 2   | -1 | 15835.1  | 1614.47 | 5  |
| 7 | -3  | -1 | 357.026  | 450.949 | 5  |
| 7 | -4  | -1 | 2412.29  | 704.307 | 5  |
| 7 | -5  | 1  | -363.440 | 435.532 | 5  |
| 7 | -5  | -1 | 579.795  | 498.790 | 5  |
| 7 | -6  | -1 | 2885.75  | 814.454 | 5  |
| 7 | -6  | 1  | 2735.11  | 797.244 | 5  |
| 7 | -7  | 1  | 4.63225  | 546.894 | 5  |
| 7 | -7  | -1 | -1167.31 | 589.060 | 5  |
| 7 | -8  | -1 | 9155.66  | 1513.77 | 5  |
| 7 | -8  | 1  | 8805.98  | 1520.36 | 5  |
| 7 | -9  | -1 | 1165.88  | 1093.18 | 5  |
| 7 | -9  | -1 | 342.819  | 304.075 | 11 |
| 7 | -9  | 1  | 1036.03  | 395.690 | 11 |
| 7 | -10 | -1 | 1295.36  | 409.212 | 11 |
| 7 | -10 | 1  | 1948.32  | 498.443 | 11 |
| 7 | 11  | -1 | 1275.05  | 347.539 | 12 |
| 7 | -11 | 1  | 562.045  | 335.861 | 11 |

|   |     |    |          |         |    |
|---|-----|----|----------|---------|----|
| 7 | -12 | 1  | 615.452  | 348.892 | 11 |
| 7 | -12 | -1 | 606.927  | 306.016 | 11 |
| 7 | 12  | -1 | 1221.81  | 347.284 | 12 |
| 7 | -13 | -1 | -251.385 | 256.959 | 11 |
| 7 | 13  | -1 | 91.1583  | 180.904 | 12 |
| 7 | -13 | 1  | -280.756 | 271.936 | 11 |
| 7 | 14  | -1 | 190.747  | 176.716 | 12 |
| 7 | -14 | 1  | -162.640 | 229.467 | 11 |
| 7 | -14 | -1 | 26.2631  | 189.908 | 11 |
| 7 | -15 | -1 | -199.527 | 198.427 | 11 |
| 7 | -15 | 1  | 207.237  | 208.003 | 11 |
| 7 | -16 | -1 | -138.234 | 175.875 | 11 |
| 7 | -16 | 1  | 474.714  | 204.515 | 11 |
| 8 | 0   | -1 | -180.480 | 480.611 | 5  |
| 8 | 1   | -1 | 416.642  | 503.130 | 5  |
| 8 | -1  | -1 | -261.407 | 546.342 | 5  |
| 8 | -2  | -1 | 836.155  | 578.581 | 5  |
| 8 | -3  | -1 | 250.574  | 576.621 | 5  |
| 8 | -3  | -1 | 588.233  | 307.608 | 11 |
| 8 | -3  | 1  | 194.548  | 235.787 | 6  |
| 8 | 3   | 1  | 226.240  | 267.906 | 6  |
| 8 | 3   | -1 | -125.918 | 279.269 | 6  |
| 8 | -3  | -1 | -74.3228 | 220.317 | 6  |
| 8 | -4  | -1 | 170.722  | 202.799 | 11 |
| 8 | 4   | 1  | 666.681  | 282.631 | 6  |
| 8 | -4  | -1 | 632.209  | 245.205 | 6  |
| 8 | -4  | 1  | 659.411  | 240.808 | 6  |
| 8 | 4   | -1 | 422.297  | 200.096 | 6  |
| 8 | -4  | -1 | 1097.18  | 709.296 | 5  |
| 8 | 4   | -1 | 626.918  | 289.308 | 11 |
| 8 | -5  | -1 | 157.124  | 240.296 | 11 |
| 8 | -5  | -1 | 271.895  | 479.608 | 5  |
| 8 | -5  | 1  | -63.2801 | 229.459 | 6  |
| 8 | -5  | -1 | -71.7587 | 235.693 | 6  |
| 8 | -6  | -1 | 662.473  | 986.933 | 5  |
| 8 | -6  | -1 | -147.600 | 222.214 | 11 |
| 8 | -6  | 1  | -127.456 | 283.147 | 11 |
| 8 | -7  | 1  | 492.451  | 294.405 | 11 |
| 8 | -7  | -1 | 138.441  | 232.960 | 11 |
| 8 | -8  | 1  | 150.853  | 260.930 | 11 |
| 8 | -8  | -1 | 193.930  | 242.016 | 11 |
| 8 | -9  | 1  | -231.729 | 268.895 | 11 |
| 8 | -9  | -1 | 8.94371  | 201.048 | 11 |
| 8 | -10 | 1  | -1.78173 | 214.674 | 11 |
| 8 | -10 | -1 | 8.72307  | 232.442 | 11 |
| 8 | -11 | -1 | -97.7113 | 220.627 | 11 |
| 8 | -11 | 1  | 349.959  | 252.124 | 11 |
| 8 | -12 | -1 | -287.393 | 222.436 | 11 |
| 8 | -12 | 1  | -232.192 | 223.850 | 11 |
| 8 | -13 | -1 | 40.2318  | 181.462 | 11 |
| 8 | -13 | 1  | 149.726  | 193.946 | 11 |
| 8 | -14 | 1  | 204.584  | 166.115 | 11 |
| 8 | -14 | -1 | 287.059  | 192.569 | 11 |
| 8 | -15 | 1  | 384.911  | 180.783 | 11 |
| 8 | -15 | -1 | -71.6945 | 139.973 | 11 |
| 9 | 0   | -1 | 92.1938  | 182.901 | 6  |
| 9 | 0   | 1  | 305.602  | 203.988 | 6  |
| 9 | 0   | -1 | 84.9775  | 214.495 | 11 |

|    |     |    |          |         |    |
|----|-----|----|----------|---------|----|
| 9  | -1  | -1 | 104.711  | 179.088 | 6  |
| 9  | 1   | -1 | 11.2539  | 190.256 | 6  |
| 9  | -1  | 1  | 8.66938  | 186.869 | 6  |
| 9  | 1   | -1 | -17.9464 | 198.778 | 11 |
| 9  | -1  | -1 | -404.967 | 254.353 | 11 |
| 9  | 1   | 1  | 125.887  | 174.234 | 6  |
| 9  | -2  | 1  | 615.257  | 266.995 | 6  |
| 9  | 2   | -1 | 658.136  | 277.441 | 6  |
| 9  | -2  | -1 | 1031.95  | 297.061 | 6  |
| 9  | 2   | 1  | 810.121  | 270.292 | 6  |
| 9  | 2   | -1 | 278.662  | 230.614 | 11 |
| 9  | -3  | -1 | 251.987  | 237.502 | 11 |
| 9  | -3  | 1  | 1424.23  | 322.451 | 6  |
| 9  | 3   | -1 | 212.891  | 236.926 | 11 |
| 9  | 3   | -1 | 1595.42  | 343.162 | 6  |
| 9  | -3  | -1 | 1437.80  | 334.754 | 6  |
| 9  | 3   | 1  | 966.167  | 275.162 | 6  |
| 9  | -4  | -1 | 2160.34  | 372.779 | 6  |
| 9  | 4   | 1  | 1944.96  | 381.456 | 6  |
| 9  | -4  | 1  | 2521.65  | 412.232 | 6  |
| 9  | 4   | -1 | 1758.05  | 367.871 | 6  |
| 9  | -5  | -1 | 113.579  | 218.504 | 11 |
| 9  | -5  | -1 | 1147.97  | 282.641 | 6  |
| 9  | 5   | -1 | 945.429  | 273.672 | 6  |
| 9  | -5  | 1  | 998.745  | 296.110 | 6  |
| 9  | 5   | 1  | 862.202  | 283.210 | 6  |
| 9  | -6  | -1 | 168.000  | 225.136 | 11 |
| 9  | -6  | 1  | 127.512  | 222.057 | 11 |
| 9  | -7  | -1 | 388.664  | 269.237 | 11 |
| 9  | -7  | 1  | -56.7722 | 195.538 | 11 |
| 9  | -8  | -1 | 17.5327  | 210.965 | 11 |
| 9  | -8  | 1  | 632.804  | 276.057 | 11 |
| 9  | -9  | -1 | -6.07980 | 193.567 | 11 |
| 9  | -9  | 1  | -93.3561 | 202.625 | 11 |
| 9  | -10 | -1 | -33.9541 | 194.462 | 11 |
| 9  | -10 | 1  | 621.494  | 248.102 | 11 |
| 9  | -11 | 1  | 118.786  | 182.094 | 11 |
| 9  | -11 | -1 | -430.549 | 230.622 | 11 |
| 9  | -12 | 1  | 349.209  | 194.109 | 11 |
| 9  | -12 | -1 | -262.124 | 197.826 | 11 |
| 9  | -13 | 1  | 136.154  | 157.320 | 11 |
| 9  | -13 | -1 | 275.467  | 161.584 | 11 |
| 10 | 0   | -1 | 103.368  | 195.030 | 11 |
| 10 | 0   | -1 | -357.732 | 217.192 | 6  |
| 10 | 0   | 1  | -23.3884 | 177.481 | 6  |
| 10 | 1   | -1 | -38.1625 | 174.616 | 6  |
| 10 | -1  | 1  | -174.867 | 205.971 | 6  |
| 10 | 1   | -1 | -335.058 | 237.002 | 11 |
| 10 | -1  | -1 | 252.200  | 203.883 | 6  |
| 10 | 1   | 1  | 1.23388  | 186.517 | 6  |
| 10 | -1  | -1 | 301.636  | 240.326 | 11 |
| 10 | 2   | -1 | -83.9187 | 202.154 | 6  |
| 10 | 2   | 1  | -28.0920 | 208.072 | 6  |
| 10 | -2  | 1  | -64.0211 | 180.475 | 6  |
| 10 | -2  | -1 | -33.9372 | 193.770 | 11 |
| 10 | -2  | -1 | 21.2767  | 183.034 | 6  |
| 10 | 3   | -1 | 113.599  | 185.979 | 6  |
| 10 | -3  | 1  | 202.812  | 194.213 | 6  |

|    |     |    |          |         |    |
|----|-----|----|----------|---------|----|
| 10 | -3  | -1 | 64.2355  | 204.601 | 11 |
| 10 | -3  | -1 | 166.284  | 188.650 | 6  |
| 10 | 3   | 1  | -17.8787 | 170.565 | 6  |
| 10 | 4   | -1 | -380.206 | 211.611 | 6  |
| 10 | -4  | -1 | 320.702  | 221.067 | 11 |
| 10 | -4  | -1 | -214.647 | 193.166 | 6  |
| 10 | -5  | -1 | 76.2974  | 167.522 | 6  |
| 10 | 5   | -1 | -81.6259 | 179.316 | 6  |
| 10 | -5  | -1 | -30.8461 | 171.930 | 11 |
| 10 | -6  | -1 | -52.4006 | 179.786 | 11 |
| 10 | -7  | -1 | -112.981 | 182.313 | 11 |
| 10 | -8  | -1 | 169.153  | 178.585 | 11 |
| 10 | -9  | -1 | 314.346  | 198.585 | 11 |
| 10 | -10 | -1 | 254.677  | 164.842 | 11 |
| 10 | -11 | -1 | 45.6034  | 140.385 | 11 |
| 11 | 0   | -1 | -7.37583 | 180.529 | 6  |
| 11 | 1   | -1 | 62.0824  | 186.326 | 6  |
| 11 | -1  | -1 | 360.598  | 194.527 | 6  |
| 11 | -2  | -1 | 382.337  | 226.478 | 11 |
| 11 | 2   | -1 | -11.3334 | 191.479 | 6  |
| 11 | -2  | -1 | 48.0497  | 157.860 | 6  |
| 11 | -3  | -1 | 34.1896  | 153.129 | 6  |
| 11 | 3   | -1 | -195.430 | 173.533 | 6  |
| 11 | -4  | -1 | 17.1265  | 160.162 | 11 |
| 11 | 4   | -1 | -103.127 | 149.969 | 6  |
| 11 | -4  | -1 | 387.298  | 195.581 | 6  |
| 11 | -5  | -1 | -385.338 | 200.283 | 11 |
| 11 | -6  | -1 | 147.781  | 166.021 | 11 |
| 11 | -7  | -1 | 74.5911  | 146.431 | 11 |
| 11 | -8  | -1 | 43.6783  | 140.072 | 11 |
| 0  | 0   | 2  | 677572.  | 5638.76 | 2  |
| 0  | 1   | 2  | -93.6152 | 186.199 | 2  |
| 0  | -1  | 2  | 40.8375  | 123.698 | 2  |
| 0  | 2   | 2  | 111409.  | 2711.61 | 2  |
| 0  | -2  | 2  | 134600.  | 1891.27 | 2  |
| 0  | 3   | 2  | 70.1101  | 184.625 | 2  |
| 0  | 4   | -2 | 1318.44  | 223.374 | 4  |
| 0  | 4   | 2  | 1066.41  | 369.414 | 2  |
| 0  | 5   | -2 | 77.9854  | 144.440 | 4  |
| 0  | 5   | 2  | 169.291  | 207.983 | 2  |
| 0  | 5   | 2  | -43.6412 | 104.022 | 3  |
| 0  | 6   | 2  | 9476.25  | 514.074 | 3  |
| 0  | -6  | -2 | 11197.1  | 843.058 | 5  |
| 0  | 6   | -2 | 10491.4  | 662.250 | 4  |
| 0  | -7  | -2 | 108.997  | 231.965 | 5  |
| 0  | 7   | -2 | 115.148  | 139.378 | 4  |
| 0  | 8   | -2 | 179259.  | 3144.08 | 4  |
| 0  | -8  | -2 | 175288.  | 4075.78 | 5  |
| 0  | -9  | -2 | 47.8535  | 243.840 | 5  |
| 0  | 9   | -2 | 54.9957  | 163.568 | 4  |
| 0  | -10 | -2 | 107750.  | 3787.46 | 5  |
| 0  | 10  | -2 | 114495.  | 2739.23 | 4  |
| 0  | -11 | -2 | -998.307 | 511.286 | 5  |
| 0  | 11  | -2 | -87.4083 | 232.062 | 4  |
| 0  | -12 | 2  | 50472.0  | 3597.37 | 5  |
| 0  | 12  | -2 | 60283.3  | 2158.42 | 4  |
| 0  | -12 | -2 | 52922.6  | 3014.04 | 5  |
| 0  | 13  | -2 | -381.154 | 267.853 | 4  |

|    |     |    |          |         |   |
|----|-----|----|----------|---------|---|
| 0  | -13 | 2  | 633.847  | 568.787 | 5 |
| 0  | 14  | 2  | 733.007  | 291.288 | 8 |
| 0  | -14 | 2  | 514.566  | 766.323 | 5 |
| 0  | 15  | 2  | -10.7767 | 355.349 | 8 |
| 0  | 16  | -2 | 7126.62  | 821.054 | 8 |
| 0  | 16  | 2  | 6882.68  | 858.822 | 8 |
| 0  | 17  | -2 | 79.8918  | 259.347 | 8 |
| 0  | 17  | 2  | 58.9546  | 279.665 | 8 |
| 0  | 18  | 2  | 12318.9  | 1068.68 | 8 |
| 0  | 18  | -2 | 12852.1  | 992.311 | 8 |
| 0  | 19  | -2 | -336.713 | 296.763 | 8 |
| 0  | 19  | 2  | -31.5664 | 252.187 | 8 |
| 0  | 20  | 2  | 7630.98  | 712.511 | 8 |
| -1 | 0   | -2 | 859198.  | 6240.06 | 2 |
| 1  | 0   | 2  | 847865.  | 6854.31 | 2 |
| -1 | 1   | -2 | 4745.23  | 435.747 | 2 |
| -1 | -1  | -2 | 5790.28  | 577.230 | 2 |
| 1  | 1   | 2  | 5733.77  | 609.209 | 2 |
| -1 | -2  | -2 | 5748.21  | 627.166 | 2 |
| 1  | 2   | 2  | 4207.45  | 573.487 | 2 |
| -1 | 2   | -2 | 4625.71  | 393.378 | 2 |
| 1  | 3   | 2  | 5893.70  | 728.546 | 2 |
| -1 | 3   | -2 | 6549.47  | 414.074 | 2 |
| 1  | 3   | 2  | 5789.91  | 390.442 | 3 |
| -1 | -3  | -2 | 7439.54  | 743.796 | 2 |
| 1  | 3   | -2 | 6570.96  | 398.962 | 4 |
| -1 | 4   | 2  | 154296.  | 2576.75 | 3 |
| -1 | 4   | -2 | 159657.  | 1753.59 | 2 |
| 1  | 4   | -2 | 157907.  | 2126.48 | 4 |
| 1  | 4   | 2  | 154579.  | 2006.57 | 3 |
| 1  | 5   | 2  | -298.013 | 400.304 | 2 |
| 1  | -5  | -2 | 75.4031  | 177.657 | 5 |
| -1 | 5   | 2  | 34.4725  | 182.575 | 3 |
| 1  | 5   | -2 | 104.432  | 131.629 | 4 |
| 1  | 6   | -2 | 248329.  | 3172.75 | 4 |
| 1  | -6  | -2 | 256988.  | 4211.18 | 5 |
| -1 | 7   | -2 | 12982.3  | 823.084 | 4 |
| -1 | -7  | -2 | 15226.5  | 1088.54 | 5 |
| 1  | 7   | -2 | 13992.3  | 809.993 | 4 |
| 1  | -7  | -2 | 12868.4  | 1057.97 | 5 |
| -1 | -8  | -2 | 99000.7  | 3064.51 | 5 |
| 1  | -8  | -2 | 92363.8  | 3041.48 | 5 |
| -1 | 8   | -2 | 91401.3  | 2285.17 | 4 |
| 1  | 8   | -2 | 95474.3  | 2238.37 | 4 |
| 1  | 9   | -2 | 240.916  | 188.744 | 4 |
| 1  | -9  | 2  | -135.951 | 471.698 | 5 |
| 1  | -9  | -2 | 355.094  | 309.306 | 5 |
| -1 | -9  | -2 | -78.6388 | 332.507 | 5 |
| -1 | 9   | -2 | 50.9540  | 202.437 | 4 |
| 1  | -10 | 2  | 59051.1  | 3653.30 | 5 |
| 1  | 10  | -2 | 64372.4  | 2000.74 | 4 |
| -1 | 10  | -2 | 61570.0  | 2066.66 | 4 |
| 1  | -10 | -2 | 61405.3  | 2959.55 | 5 |
| 1  | 11  | -2 | 2002.84  | 402.798 | 4 |
| 1  | -11 | 2  | 1782.39  | 808.012 | 5 |
| 1  | -11 | -2 | 2638.11  | 778.232 | 5 |
| -1 | 11  | -2 | 1899.73  | 421.878 | 4 |
| 1  | -12 | 2  | 50703.7  | 3762.18 | 5 |

|    |     |    |          |         |    |
|----|-----|----|----------|---------|----|
| -1 | 12  | -2 | 59573.2  | 2251.17 | 4  |
| 1  | 12  | -2 | 53318.7  | 1943.28 | 4  |
| 1  | -12 | -2 | 48959.5  | 3020.03 | 5  |
| 1  | 13  | -2 | 40.3531  | 268.320 | 4  |
| 1  | -13 | -2 | 450.319  | 647.671 | 5  |
| 1  | -13 | 2  | -158.147 | 624.293 | 5  |
| -1 | 13  | -2 | 520.292  | 324.474 | 4  |
| -1 | 14  | -2 | 35432.1  | 1813.77 | 4  |
| 1  | -14 | 2  | 28321.7  | 2998.36 | 5  |
| 1  | 14  | -2 | 32584.0  | 1742.69 | 12 |
| 1  | -14 | -2 | 28624.6  | 2521.14 | 5  |
| -1 | -14 | 2  | 27025.3  | 2862.63 | 5  |
| -1 | 14  | 2  | 31931.6  | 1694.75 | 8  |
| 1  | 14  | 2  | 31895.3  | 1634.05 | 8  |
| -1 | 15  | 2  | 948.571  | 403.539 | 8  |
| 1  | 15  | 2  | 738.944  | 267.683 | 8  |
| 1  | 16  | 2  | 17457.0  | 1285.55 | 8  |
| -1 | 16  | 2  | 19101.0  | 1393.40 | 8  |
| 1  | 16  | -2 | 16407.8  | 1201.11 | 8  |
| 1  | 17  | -2 | -111.375 | 309.082 | 8  |
| -1 | 17  | 2  | -74.1919 | 304.882 | 8  |
| 1  | 17  | 2  | -280.536 | 373.030 | 8  |
| 1  | 18  | 2  | 4928.19  | 685.461 | 8  |
| 1  | 18  | -2 | 5190.88  | 650.780 | 8  |
| -1 | 18  | 2  | 4895.41  | 722.793 | 8  |
| 1  | 19  | -2 | 100.139  | 225.255 | 8  |
| -1 | 19  | 2  | 741.546  | 345.543 | 8  |
| 1  | 19  | 2  | 423.074  | 310.802 | 8  |
| 1  | 20  | 2  | 4725.82  | 542.345 | 8  |
| -1 | 20  | 2  | 5824.89  | 627.183 | 8  |
| -2 | 0   | -2 | 359118.  | 4566.12 | 2  |
| 2  | -1  | -2 | 41412.5  | 1348.96 | 5  |
| 2  | 1   | -2 | 40279.5  | 1399.43 | 5  |
| -2 | 1   | -2 | 41005.1  | 1527.85 | 2  |
| -2 | -1  | -2 | 39593.3  | 1568.36 | 2  |
| -2 | -2  | -2 | 7163.76  | 705.995 | 2  |
| 2  | 2   | -2 | 8022.79  | 678.255 | 5  |
| 2  | -2  | -2 | 8481.03  | 646.502 | 5  |
| -2 | 2   | -2 | 9126.21  | 694.933 | 2  |
| -2 | -3  | -2 | 57284.1  | 2087.68 | 2  |
| 2  | -3  | -2 | 57472.5  | 1733.46 | 5  |
| -2 | 4   | 2  | 107028.  | 2334.11 | 3  |
| 2  | -4  | 2  | 110435.  | 3197.33 | 5  |
| 2  | -4  | -2 | 116023.  | 2601.21 | 5  |
| -2 | 5   | 2  | 128789.  | 2561.77 | 3  |
| 2  | -5  | -2 | 133121.  | 2996.75 | 5  |
| 2  | -5  | 2  | 125774.  | 3777.10 | 5  |
| 2  | -6  | 2  | 69050.2  | 3117.37 | 5  |
| 2  | -6  | -2 | 73414.7  | 2440.00 | 5  |
| 2  | -7  | 2  | 13501.1  | 1548.94 | 5  |
| 2  | -7  | -2 | 14058.0  | 1182.43 | 5  |
| 2  | -8  | -2 | 33161.8  | 1943.84 | 5  |
| 2  | -8  | 2  | 34051.4  | 2572.53 | 5  |
| 2  | -9  | 2  | 2590.41  | 876.522 | 5  |
| 2  | -9  | -2 | 3809.78  | 749.713 | 5  |
| 2  | -10 | 2  | 24554.7  | 2504.22 | 5  |
| 2  | -10 | -2 | 25601.1  | 2007.25 | 5  |
| -2 | 10  | -2 | 25774.1  | 1441.44 | 4  |

|    |     |    |          |         |    |
|----|-----|----|----------|---------|----|
| 2  | -11 | -2 | 2879.35  | 739.675 | 5  |
| -2 | 11  | -2 | 2824.36  | 513.093 | 4  |
| 2  | -11 | 2  | 2880.34  | 998.233 | 5  |
| 2  | -12 | 2  | 30632.7  | 3031.96 | 5  |
| -2 | 12  | -2 | 29760.3  | 1621.71 | 4  |
| 2  | -12 | -2 | 28910.1  | 2386.13 | 5  |
| -2 | 13  | -2 | 25197.4  | 1562.23 | 4  |
| 2  | -13 | -2 | 20503.8  | 2110.02 | 5  |
| 2  | -13 | 2  | 20306.0  | 2538.98 | 5  |
| 2  | -14 | -2 | 5265.76  | 1199.45 | 5  |
| 2  | 14  | -2 | 4775.66  | 720.220 | 12 |
| 2  | -14 | 2  | 4614.76  | 1302.55 | 5  |
| -2 | 14  | -2 | 5882.88  | 774.594 | 4  |
| -2 | 14  | 2  | 4878.52  | 737.109 | 8  |
| 2  | 14  | 2  | 5476.03  | 702.036 | 8  |
| 2  | 15  | -2 | 11455.9  | 1086.74 | 12 |
| 2  | 15  | 2  | 10537.5  | 963.267 | 8  |
| -2 | 15  | 2  | 12106.6  | 1118.76 | 8  |
| 2  | 16  | 2  | 8355.76  | 870.242 | 8  |
| -2 | 16  | 2  | 9153.12  | 976.700 | 8  |
| 2  | 17  | 2  | -9.31496 | 302.683 | 8  |
| -2 | 17  | 2  | 722.781  | 452.837 | 8  |
| 2  | 17  | -2 | 365.064  | 297.231 | 8  |
| 2  | 18  | 2  | 2664.28  | 491.807 | 8  |
| -2 | 18  | 2  | 3216.45  | 592.853 | 8  |
| 2  | 18  | -2 | 2372.76  | 462.881 | 8  |
| 2  | 19  | -2 | 280.777  | 259.200 | 8  |
| 2  | 19  | 2  | 384.269  | 245.428 | 8  |
| 2  | 20  | -2 | 2190.16  | 351.379 | 8  |
| 2  | 20  | 2  | 1395.20  | 295.455 | 8  |
| 3  | 0   | -2 | 144036.  | 2994.54 | 5  |
| 3  | 1   | -2 | 66529.4  | 2106.28 | 5  |
| 3  | -1  | -2 | 67258.6  | 2054.90 | 5  |
| 3  | 2   | -2 | 133447.  | 3108.56 | 5  |
| 3  | -2  | -2 | 134575.  | 2945.07 | 5  |
| 3  | -3  | -2 | 44781.7  | 1779.90 | 5  |
| 3  | -3  | 2  | 46763.5  | 1868.47 | 5  |
| 3  | -4  | -2 | 89936.4  | 2639.63 | 5  |
| 3  | -4  | 2  | 99902.0  | 3150.73 | 5  |
| 3  | -5  | -2 | 8438.08  | 863.848 | 5  |
| 3  | -5  | 2  | 8762.22  | 1101.35 | 5  |
| 3  | -6  | -2 | 92836.4  | 2975.87 | 5  |
| 3  | -6  | 2  | 96734.8  | 3939.12 | 5  |
| 3  | -7  | -2 | 64818.5  | 2651.52 | 5  |
| 3  | -7  | 2  | 63078.1  | 3444.56 | 5  |
| 3  | -8  | -2 | 54541.3  | 2609.77 | 5  |
| 3  | -8  | 2  | 53098.2  | 3427.68 | 5  |
| 3  | -9  | -2 | 13809.1  | 1414.61 | 5  |
| 3  | -9  | 2  | 15534.3  | 2022.46 | 5  |
| 3  | -10 | -2 | 37193.6  | 2456.39 | 5  |
| 3  | -10 | 2  | 43870.4  | 3474.04 | 5  |
| 3  | -11 | -2 | 3374.67  | 856.036 | 5  |
| -3 | 11  | -2 | 4409.26  | 681.816 | 4  |
| 3  | -11 | 2  | 4336.11  | 1298.60 | 5  |
| -3 | 12  | -2 | 44005.2  | 2105.24 | 4  |
| 3  | -12 | -2 | 34925.8  | 2639.79 | 5  |
| 3  | -12 | 2  | 42980.8  | 3694.60 | 5  |
| -3 | 13  | -2 | 17231.0  | 1312.52 | 4  |

|    |     |    |         |         |    |
|----|-----|----|---------|---------|----|
| 3  | -13 | -2 | 14722.3 | 1815.78 | 5  |
| 3  | 13  | -2 | 15005.7 | 1179.91 | 12 |
| 3  | 13  | 2  | 16379.1 | 1084.67 | 8  |
| 3  | -13 | 2  | 18203.5 | 2506.91 | 5  |
| 3  | 14  | -2 | 6025.54 | 779.012 | 12 |
| 3  | 14  | 2  | 6422.49 | 715.840 | 8  |
| 3  | 15  | 2  | 2365.86 | 468.563 | 8  |
| 3  | 15  | -2 | 1656.49 | 445.340 | 12 |
| 3  | 16  | 2  | 11128.0 | 943.221 | 8  |
| 3  | 17  | -2 | 1373.83 | 376.576 | 8  |
| 3  | 17  | 2  | 1314.75 | 380.676 | 8  |
| 3  | 18  | 2  | 3034.48 | 478.918 | 8  |
| 3  | 18  | -2 | 3179.35 | 490.173 | 8  |
| 3  | 19  | -2 | 1144.69 | 305.958 | 8  |
| 3  | 19  | 2  | 1166.76 | 302.611 | 8  |
| 3  | 20  | -2 | 2305.37 | 339.887 | 8  |
| 3  | 20  | 2  | 1362.45 | 315.440 | 8  |
| 4  | 0   | -2 | 2740.75 | 505.721 | 5  |
| 4  | 1   | -2 | 21032.3 | 1363.44 | 5  |
| 4  | -1  | -2 | 22802.2 | 1391.29 | 5  |
| 4  | -2  | -2 | 6341.47 | 756.182 | 5  |
| 4  | 2   | -2 | 6997.43 | 819.299 | 5  |
| 4  | 3   | -2 | 26579.9 | 1665.39 | 5  |
| 4  | -3  | -2 | 25106.6 | 1504.37 | 5  |
| 4  | -3  | 2  | 27887.2 | 1484.75 | 5  |
| 4  | -4  | -2 | 130863. | 3554.49 | 5  |
| 4  | -4  | 2  | 141850. | 3736.76 | 5  |
| 4  | -5  | 2  | 17324.9 | 1494.26 | 5  |
| 4  | -5  | -2 | 17445.4 | 1367.67 | 5  |
| 4  | -6  | -2 | 72350.6 | 2936.15 | 5  |
| 4  | -6  | 2  | 71633.7 | 3335.14 | 5  |
| 4  | -7  | -2 | 12508.6 | 1302.47 | 5  |
| 4  | -7  | 2  | 12506.6 | 1580.00 | 5  |
| 4  | -8  | 2  | 1616.20 | 723.725 | 5  |
| 4  | -8  | -2 | 1919.53 | 625.816 | 5  |
| 4  | -9  | -2 | 10158.9 | 1321.35 | 5  |
| 4  | -9  | 2  | 7917.31 | 1450.44 | 5  |
| 4  | -10 | 2  | 408.719 | 624.572 | 5  |
| 4  | -10 | -2 | 1059.64 | 567.155 | 5  |
| 4  | -11 | -2 | 5802.82 | 1151.65 | 5  |
| 4  | -11 | 2  | 4755.36 | 1330.04 | 5  |
| 4  | -12 | -2 | 7773.51 | 1375.52 | 5  |
| -4 | 12  | -2 | 9111.50 | 1042.76 | 4  |
| 4  | 12  | -2 | 7224.20 | 815.021 | 12 |
| 4  | -12 | 2  | 7954.16 | 1575.76 | 5  |
| 4  | -13 | 2  | 3195.60 | 1402.20 | 5  |
| 4  | 13  | -2 | 3042.94 | 584.826 | 12 |
| 4  | -13 | -2 | 3652.04 | 1242.22 | 5  |
| 4  | 13  | 2  | 3338.56 | 517.850 | 8  |
| 4  | 14  | -2 | 11129.1 | 1031.43 | 12 |
| 4  | 14  | 2  | 11979.8 | 927.999 | 8  |
| 4  | 15  | 2  | 2258.86 | 424.398 | 8  |
| 4  | 15  | -2 | 1731.81 | 441.640 | 12 |
| 4  | 16  | 2  | 5694.55 | 654.084 | 8  |
| 4  | 17  | -2 | 610.395 | 240.353 | 8  |
| 4  | -17 | -2 | 610.728 | 269.428 | 11 |
| 4  | 17  | 2  | 805.791 | 278.995 | 8  |
| 4  | 18  | -2 | 268.748 | 214.027 | 8  |



|   |     |            |         |    |
|---|-----|------------|---------|----|
| 4 | -18 | -2-53.6803 | 166.484 | 11 |
| 4 | 18  | 2-21.8517  | 200.214 | 8  |
| 4 | 19  | -2 358.031 | 181.475 | 8  |
| 4 | 19  | 2 375.701  | 206.095 | 8  |
| 5 | 0   | -2 17663.6 | 1388.26 | 5  |
| 5 | 1   | -2 28262.5 | 1781.13 | 5  |
| 5 | -1  | -2 26615.0 | 1702.15 | 5  |
| 5 | -2  | -2 3469.16 | 670.137 | 5  |
| 5 | 2   | -2 3069.72 | 630.120 | 5  |
| 5 | 3   | -2 45183.4 | 2380.85 | 5  |
| 5 | -3  | -2 44583.4 | 2257.99 | 5  |
| 5 | -4  | -2 20085.2 | 1570.70 | 5  |
| 5 | -5  | 2 23580.3  | 1770.41 | 5  |
| 5 | -5  | -2 21986.9 | 1683.43 | 5  |
| 5 | -6  | -2 5657.96 | 920.169 | 5  |
| 5 | -6  | 2 7570.34  | 1122.64 | 5  |
| 5 | -7  | -2 21023.7 | 1815.10 | 5  |
| 5 | -7  | 2 21888.6  | 2004.15 | 5  |
| 5 | -8  | 2 3693.17  | 997.628 | 5  |
| 5 | -8  | -2 2993.09 | 770.215 | 5  |
| 5 | -9  | 2 15174.8  | 1947.71 | 5  |
| 5 | -9  | -2 13664.1 | 1604.17 | 5  |
| 5 | -10 | -2 10370.1 | 1473.86 | 5  |
| 5 | -10 | 2 9996.43  | 1606.78 | 5  |
| 5 | 11  | -2 4687.14 | 639.338 | 12 |
| 5 | -11 | -2 5264.43 | 1175.49 | 5  |
| 5 | -11 | 2 3658.68  | 1161.98 | 5  |
| 5 | -12 | 2 5411.17  | 1854.98 | 5  |
| 5 | 12  | -2 3978.37 | 610.489 | 12 |
| 5 | 13  | -2 7700.42 | 839.966 | 12 |
| 5 | -14 | -2 226.723 | 263.498 | 11 |
| 5 | 14  | -2 390.245 | 307.299 | 12 |
| 5 | 15  | -2 1897.88 | 445.060 | 12 |
| 5 | -15 | -2-43.7921 | 214.424 | 11 |
| 5 | -16 | -2-215.723 | 237.940 | 11 |
| 5 | 16  | -2 981.107 | 277.761 | 8  |
| 5 | 17  | -2 1302.35 | 275.973 | 8  |
| 5 | -17 | -2-23.4623 | 174.689 | 11 |
| 5 | -18 | -2-154.903 | 161.132 | 11 |
| 5 | -18 | 2 137.094  | 172.365 | 11 |
| 6 | 0   | -2 1645.66 | 551.893 | 5  |
| 6 | -1  | -2 35579.2 | 2197.93 | 5  |
| 6 | 1   | -2 35906.6 | 2239.30 | 5  |
| 6 | 2   | -2 1841.40 | 572.334 | 5  |
| 6 | -2  | -2 2486.96 | 658.479 | 5  |
| 6 | -3  | -2 8100.25 | 1119.01 | 5  |
| 6 | -4  | -2 683.807 | 415.357 | 5  |
| 6 | -5  | -2 62.3456 | 330.202 | 5  |
| 6 | -6  | -2 3593.44 | 822.080 | 5  |
| 6 | -7  | -2 5426.23 | 1029.33 | 5  |
| 6 | -8  | -2 598.407 | 480.700 | 5  |
| 6 | -9  | -2 1903.69 | 498.078 | 11 |
| 6 | -9  | -2 22893.3 | 2144.37 | 5  |
| 6 | 10  | -2 1129.78 | 352.316 | 12 |
| 6 | -10 | -2-163.513 | 264.368 | 11 |
| 6 | -10 | -2 364.766 | 510.087 | 5  |
| 6 | -11 | -2 15.0578 | 249.786 | 11 |
| 6 | 11  | -2 7215.02 | 769.084 | 12 |

|   |     |    |          |         |    |
|---|-----|----|----------|---------|----|
| 6 | 12  | -2 | 759.435  | 312.083 | 12 |
| 6 | -12 | -2 | 320.663  | 267.931 | 11 |
| 6 | -13 | -2 | -659.404 | 319.209 | 11 |
| 6 | 13  | -2 | 522.086  | 276.148 | 12 |
| 6 | 14  | -2 | -69.3229 | 222.823 | 12 |
| 6 | -14 | 2  | -239.000 | 291.812 | 11 |
| 6 | -14 | -2 | -24.8278 | 207.942 | 11 |
| 6 | 15  | -2 | -391.642 | 241.310 | 12 |
| 6 | -15 | -2 | 161.441  | 217.518 | 11 |
| 6 | -15 | 2  | -64.7437 | 228.852 | 11 |
| 6 | 15  | -2 | 48.0626  | 167.951 | 8  |
| 6 | 16  | -2 | 320.599  | 202.505 | 8  |
| 6 | -16 | 2  | 24.2814  | 174.800 | 11 |
| 6 | -17 | -2 | 24.7438  | 137.561 | 11 |
| 6 | -17 | 2  | -298.189 | 184.807 | 11 |
| 7 | 0   | -2 | -33.2679 | 392.146 | 5  |
| 7 | 1   | -2 | 3566.85  | 838.734 | 5  |
| 7 | -1  | -2 | 4492.44  | 928.632 | 5  |
| 7 | -2  | -2 | 479.298  | 400.907 | 5  |
| 7 | 2   | -2 | 776.316  | 608.656 | 5  |
| 7 | -3  | -2 | 8774.76  | 1252.60 | 5  |
| 7 | -4  | -2 | 168.569  | 460.489 | 5  |
| 7 | -5  | -2 | 4096.71  | 920.024 | 5  |
| 7 | -6  | -2 | 620.207  | 557.418 | 5  |
| 7 | -7  | -2 | 2429.61  | 775.064 | 5  |
| 7 | -7  | -2 | 643.466  | 284.015 | 11 |
| 7 | -8  | -2 | -180.176 | 401.674 | 5  |
| 7 | -8  | -2 | -382.972 | 265.138 | 11 |
| 7 | 8   | -2 | 75.4639  | 312.799 | 12 |
| 7 | -9  | -2 | 118.057  | 218.400 | 11 |
| 7 | 9   | -2 | 2173.72  | 443.863 | 12 |
| 7 | 10  | -2 | 30.9163  | 242.524 | 12 |
| 7 | -10 | -2 | 201.255  | 258.433 | 11 |
| 7 | -10 | 2  | 300.122  | 306.245 | 11 |
| 7 | -11 | -2 | 208.597  | 248.698 | 11 |
| 7 | -11 | 2  | 563.959  | 342.993 | 11 |
| 7 | 12  | -2 | 440.029  | 259.850 | 12 |
| 7 | -12 | -2 | -47.7847 | 211.120 | 11 |
| 7 | -12 | 2  | 98.1429  | 250.243 | 11 |
| 7 | -13 | -2 | -78.8676 | 204.837 | 11 |
| 7 | -13 | 2  | 19.9157  | 192.827 | 11 |
| 7 | -14 | -2 | -301.363 | 216.589 | 11 |
| 7 | 14  | -2 | -9.37091 | 166.881 | 12 |
| 7 | -14 | 2  | -115.766 | 201.900 | 11 |
| 7 | -15 | -2 | 489.730  | 213.751 | 11 |
| 7 | -15 | 2  | -283.712 | 209.632 | 11 |
| 7 | -16 | 2  | 20.8975  | 151.948 | 11 |
| 7 | -16 | -2 | 329.433  | 163.505 | 11 |
| 8 | 0   | -2 | 3237.11  | 890.000 | 5  |
| 8 | 0   | 2  | 3369.94  | 476.145 | 6  |
| 8 | 1   | 2  | 1365.11  | 336.858 | 6  |
| 8 | 1   | -2 | -184.102 | 255.265 | 11 |
| 8 | -1  | 2  | 1758.11  | 369.444 | 6  |
| 8 | 1   | -2 | 901.731  | 641.401 | 5  |
| 8 | -1  | -2 | -282.097 | 250.524 | 11 |
| 8 | -1  | -2 | 754.763  | 632.795 | 5  |
| 8 | -2  | -2 | 307.536  | 495.662 | 5  |
| 8 | -2  | 2  | -95.9626 | 199.218 | 6  |

|   |     |            |         |    |
|---|-----|------------|---------|----|
| 8 | 2   | 2-1.22885  | 193.554 | 6  |
| 8 | -2  | -2 415.222 | 235.434 | 11 |
| 8 | 2   | -2 29.3851 | 184.697 | 11 |
| 8 | -3  | -2 2144.92 | 755.449 | 5  |
| 8 | -3  | -2 510.797 | 253.685 | 11 |
| 8 | -3  | 2 2274.40  | 372.596 | 6  |
| 8 | 3   | 2 2413.28  | 406.737 | 6  |
| 8 | 3   | -2 365.785 | 230.947 | 11 |
| 8 | -4  | -2 1963.75 | 720.990 | 5  |
| 8 | 4   | 2 2726.30  | 424.308 | 6  |
| 8 | 4   | -2 500.797 | 281.956 | 11 |
| 8 | -4  | -2 226.332 | 244.860 | 11 |
| 8 | -4  | 2 2965.78  | 426.728 | 6  |
| 8 | -5  | 2 1308.09  | 333.518 | 6  |
| 8 | -5  | -2 1543.72 | 867.197 | 5  |
| 8 | -5  | -2 109.848 | 206.052 | 11 |
| 8 | -5  | -2 1042.96 | 304.804 | 6  |
| 8 | 5   | -2 650.255 | 253.585 | 6  |
| 8 | 5   | 2 471.624  | 283.886 | 6  |
| 8 | -6  | -2 68.7222 | 197.304 | 11 |
| 8 | -7  | -2 292.064 | 236.232 | 11 |
| 8 | -8  | -2-115.457 | 211.245 | 11 |
| 8 | -9  | -2-237.388 | 220.168 | 11 |
| 8 | -10 | -2-28.2941 | 210.886 | 11 |
| 8 | 11  | -2-156.247 | 217.957 | 12 |
| 8 | -11 | 2 124.874  | 213.428 | 11 |
| 8 | -11 | -2-379.211 | 246.849 | 11 |
| 8 | -12 | 2-285.080  | 214.100 | 11 |
| 8 | 12  | -2 82.0308 | 179.555 | 12 |
| 8 | -12 | -2 333.850 | 215.511 | 11 |
| 8 | 13  | -2 270.792 | 202.003 | 12 |
| 8 | -13 | 2 162.494  | 180.369 | 11 |
| 8 | -13 | -2 124.388 | 176.904 | 11 |
| 8 | -14 | 2 679.511  | 212.519 | 11 |
| 8 | -14 | -2 114.354 | 155.988 | 11 |
| 8 | -15 | -2 111.907 | 131.909 | 11 |
| 9 | 0   | 2-51.5618  | 186.347 | 6  |
| 9 | 0   | -2-271.411 | 226.438 | 11 |
| 9 | 0   | -2 263.862 | 175.725 | 6  |
| 9 | 1   | 2 859.543  | 275.691 | 6  |
| 9 | 1   | -2 31.9178 | 205.243 | 11 |
| 9 | -1  | -2 148.612 | 228.515 | 11 |
| 9 | -1  | -2 749.302 | 279.413 | 6  |
| 9 | 1   | -2 853.982 | 267.540 | 6  |
| 9 | -1  | 2 738.559  | 266.815 | 6  |
| 9 | -2  | 2 71.3104  | 177.798 | 6  |
| 9 | -2  | -2-127.841 | 221.217 | 11 |
| 9 | 2   | 2-340.225  | 222.704 | 6  |
| 9 | -2  | -2 172.705 | 204.232 | 6  |
| 9 | 2   | -2 58.3738 | 203.954 | 6  |
| 9 | 2   | -2 403.037 | 255.536 | 11 |
| 9 | -3  | -2 1115.74 | 296.478 | 6  |
| 9 | 3   | -2 550.259 | 232.444 | 6  |
| 9 | 3   | 2 790.109  | 282.200 | 6  |
| 9 | -3  | 2 1017.72  | 300.793 | 6  |
| 9 | -3  | -2-11.3930 | 192.340 | 11 |
| 9 | -4  | -2 305.222 | 241.178 | 11 |
| 9 | -4  | -2 252.768 | 222.483 | 6  |

|    |     |    |          |         |    |
|----|-----|----|----------|---------|----|
| 9  | 4   | -2 | 20.4824  | 205.427 | 6  |
| 9  | -5  | -2 | 300.399  | 245.510 | 11 |
| 9  | -5  | -2 | 640.513  | 252.963 | 6  |
| 9  | 5   | -2 | 321.319  | 225.930 | 6  |
| 9  | -6  | -2 | -78.6097 | 208.706 | 11 |
| 9  | -7  | -2 | 49.0604  | 185.098 | 11 |
| 9  | -8  | -2 | 67.8876  | 174.428 | 11 |
| 9  | -9  | -2 | -19.5434 | 178.761 | 11 |
| 9  | -10 | -2 | 100.668  | 194.869 | 11 |
| 9  | -11 | -2 | -47.5082 | 179.490 | 11 |
| 9  | -12 | -2 | -156.181 | 178.553 | 11 |
| 9  | -13 | -2 | 399.921  | 174.655 | 11 |
| 10 | 0   | -2 | -301.568 | 231.838 | 11 |
| 10 | 0   | -2 | 19.6063  | 195.299 | 6  |
| 10 | 1   | -2 | -188.398 | 217.491 | 11 |
| 10 | -1  | -2 | 38.5577  | 205.854 | 11 |
| 10 | -1  | -2 | 117.146  | 203.911 | 6  |
| 10 | 1   | -2 | 346.981  | 225.829 | 6  |
| 10 | -2  | -2 | 132.379  | 207.569 | 11 |
| 10 | -2  | -2 | -52.8503 | 195.449 | 6  |
| 10 | 2   | -2 | 1.20834  | 181.373 | 6  |
| 10 | 3   | -2 | 331.344  | 196.590 | 6  |
| 10 | -3  | -2 | 132.822  | 194.235 | 11 |
| 10 | -3  | -2 | 291.822  | 217.300 | 6  |
| 10 | -4  | -2 | -321.297 | 231.356 | 11 |
| 10 | 4   | -2 | 50.0829  | 181.350 | 6  |
| 10 | -4  | -2 | 13.8519  | 172.283 | 6  |
| 10 | -5  | -2 | 365.130  | 228.903 | 11 |
| 10 | 5   | -2 | 567.714  | 235.398 | 6  |
| 10 | -5  | -2 | 520.157  | 219.502 | 6  |
| 10 | -6  | -2 | 53.6770  | 175.975 | 11 |
| 10 | -7  | -2 | -441.303 | 214.229 | 11 |
| 10 | -9  | -2 | 149.132  | 157.706 | 11 |
| 10 | -10 | -2 | -189.841 | 159.380 | 11 |
| 10 | -11 | -2 | -317.344 | 146.634 | 11 |
| 11 | 0   | -2 | 176.212  | 185.758 | 6  |
| 11 | 1   | -2 | -140.187 | 190.866 | 6  |
| 11 | -1  | -2 | -11.0122 | 163.347 | 6  |
| 11 | -2  | -2 | 116.727  | 159.942 | 6  |
| 11 | 2   | -2 | 165.576  | 203.551 | 6  |
| 11 | -2  | -2 | 286.594  | 203.841 | 11 |
| 11 | -3  | -2 | 237.448  | 182.634 | 11 |
| 11 | 3   | -2 | -54.7904 | 176.911 | 6  |
| 11 | -3  | -2 | 44.6269  | 152.559 | 6  |
| 11 | -4  | -2 | 7.75544  | 149.242 | 11 |
| 11 | 4   | -2 | 263.004  | 160.958 | 6  |
| 11 | -4  | -2 | 258.475  | 185.934 | 6  |
| 11 | -5  | -2 | 149.140  | 169.059 | 11 |
| 11 | 5   | -2 | 61.2969  | 170.718 | 6  |
| 11 | -5  | -2 | 68.0697  | 157.884 | 6  |
| 11 | -6  | -2 | 84.7315  | 155.235 | 11 |
| 11 | -7  | -2 | 214.959  | 157.574 | 11 |
| 0  | 0   | 3  | -133.779 | 225.429 | 3  |
| 0  | 0   | 3  | 154.060  | 225.305 | 2  |
| 0  | -1  | 3  | 428474.  | 4911.61 | 3  |
| 0  | 1   | 3  | 424323.  | 4796.42 | 3  |
| 0  | -2  | 3  | 103.068  | 212.985 | 3  |
| 0  | 2   | 3  | -21.1501 | 183.129 | 3  |

|    |     |    |          |         |   |
|----|-----|----|----------|---------|---|
| 0  | -2  | 3  | 62.4929  | 131.234 | 2 |
| 0  | 2   | -3 | 69.8600  | 110.245 | 4 |
| 0  | 2   | 3  | 108.342  | 250.509 | 2 |
| 0  | -3  | 3  | 236734.  | 2993.67 | 2 |
| 0  | -3  | 3  | 231154.  | 3522.77 | 3 |
| 0  | 3   | -3 | 228209.  | 2592.25 | 4 |
| 0  | 3   | 3  | 232346.  | 3427.43 | 3 |
| 0  | 4   | 3  | 17.5713  | 154.227 | 3 |
| 0  | 4   | -3 | -29.5384 | 123.451 | 4 |
| 0  | 5   | 3  | 239640.  | 3283.97 | 3 |
| 0  | 5   | -3 | 256646.  | 3229.38 | 4 |
| 0  | 6   | -3 | 18.9273  | 145.057 | 4 |
| 0  | 6   | 3  | 37.3160  | 142.299 | 3 |
| 0  | 7   | 3  | 271773.  | 3421.21 | 3 |
| 0  | 7   | -3 | 302162.  | 3913.01 | 4 |
| 0  | 8   | -3 | 42.4034  | 172.686 | 4 |
| 0  | 9   | -3 | 73525.6  | 2169.44 | 4 |
| 0  | 10  | -3 | -8.07775 | 203.592 | 4 |
| 0  | 11  | -3 | 71479.7  | 2334.33 | 4 |
| 0  | 12  | -3 | 101.593  | 220.154 | 4 |
| 0  | -12 | 3  | 355.581  | 521.213 | 5 |
| 0  | -13 | 3  | 69828.4  | 4410.98 | 5 |
| 0  | 13  | -3 | 75436.8  | 2479.95 | 4 |
| 0  | 14  | -3 | -656.598 | 361.602 | 4 |
| 0  | -14 | 3  | 521.980  | 579.798 | 5 |
| 0  | 14  | 3  | -292.766 | 317.300 | 8 |
| 0  | 15  | 3  | 23690.5  | 1546.41 | 8 |
| 0  | 16  | -3 | 22.6590  | 242.669 | 8 |
| 0  | 16  | 3  | -251.094 | 350.313 | 8 |
| 0  | 17  | 3  | 15588.1  | 1234.86 | 8 |
| 0  | 17  | -3 | 17613.2  | 1149.16 | 8 |
| 0  | 18  | 3  | 60.2450  | 300.066 | 8 |
| 0  | 19  | 3  | 7617.98  | 780.002 | 8 |
| 0  | 20  | 3  | 74.1711  | 212.997 | 8 |
| 1  | 0   | 3  | 256584.  | 4582.19 | 2 |
| 1  | 0   | 3  | 250359.  | 3163.36 | 3 |
| 1  | 1   | 3  | 116478.  | 3165.41 | 2 |
| -1 | 1   | 3  | 122760.  | 2732.18 | 3 |
| 1  | -1  | 3  | 116974.  | 2119.24 | 3 |
| 1  | 1   | 3  | 115573.  | 2155.21 | 3 |
| 1  | 2   | 3  | 33084.5  | 1813.66 | 2 |
| -1 | 2   | -3 | 31534.2  | 923.110 | 4 |
| 1  | -2  | 3  | 34232.7  | 1119.87 | 3 |
| -1 | 2   | 3  | 35626.8  | 1509.71 | 3 |
| 1  | 2   | 3  | 34111.2  | 1189.52 | 3 |
| -1 | 3   | -3 | 2365.17  | 288.174 | 4 |
| 1  | 3   | -3 | 2489.82  | 281.457 | 4 |
| -1 | 3   | 3  | 2752.34  | 447.051 | 3 |
| 1  | 3   | 3  | 2408.52  | 331.965 | 3 |
| 1  | 4   | 3  | 12496.8  | 714.837 | 3 |
| -1 | 4   | 3  | 14326.0  | 915.368 | 3 |
| -1 | 4   | -3 | 12890.1  | 697.850 | 4 |
| 1  | 4   | -3 | 14070.5  | 700.893 | 4 |
| 1  | 5   | -3 | -58.9079 | 153.006 | 4 |
| 1  | -5  | -3 | 535.667  | 237.232 | 5 |
| -1 | 5   | 3  | 183.937  | 210.608 | 3 |
| 1  | 5   | 3  | 21.0485  | 124.578 | 3 |
| -1 | 5   | -3 | -60.7059 | 132.552 | 4 |

|    |     |    |         |         |    |
|----|-----|----|---------|---------|----|
| -1 | 6   | 3  | 13732.3 | 834.381 | 3  |
| -1 | 6   | -3 | 13374.6 | 798.416 | 4  |
| 1  | 6   | -3 | 15507.3 | 842.464 | 4  |
| 1  | -6  | -3 | 14495.4 | 940.610 | 5  |
| 1  | -7  | -3 | 1704.71 | 353.444 | 5  |
| 1  | 7   | -3 | 3112.71 | 418.000 | 4  |
| 1  | 8   | -3 | 462.126 | 202.460 | 4  |
| 1  | -8  | -3 | 642.017 | 342.310 | 5  |
| -1 | 8   | -3 | 517.967 | 216.434 | 4  |
| 1  | -9  | 3  | 30158.0 | 2456.65 | 5  |
| -1 | 9   | -3 | 31309.6 | 1455.48 | 4  |
| 1  | 9   | -3 | 34338.1 | 1459.10 | 4  |
| 1  | -10 | 3  | 9179.37 | 1449.50 | 5  |
| 1  | 10  | -3 | 10797.9 | 877.079 | 4  |
| -1 | 10  | -3 | 11994.2 | 961.799 | 4  |
| 1  | -11 | 3  | 16138.3 | 2074.66 | 5  |
| 1  | 11  | -3 | 19015.6 | 1186.69 | 4  |
| -1 | 11  | -3 | 17941.2 | 1198.21 | 4  |
| 1  | 12  | -3 | 862.599 | 328.958 | 4  |
| 1  | -12 | 3  | 800.690 | 656.518 | 5  |
| -1 | 12  | -3 | 961.869 | 361.704 | 4  |
| 1  | -13 | 3  | 187.774 | 741.712 | 5  |
| -1 | 13  | -3 | 613.031 | 350.562 | 4  |
| 1  | 14  | 3  | 2824.72 | 558.153 | 8  |
| 1  | -14 | 3  | 1974.02 | 787.204 | 5  |
| -1 | -14 | 3  | 3548.16 | 1308.88 | 5  |
| -1 | 14  | 3  | 3648.11 | 649.396 | 8  |
| 1  | 14  | -3 | 3488.20 | 638.033 | 12 |
| -1 | 14  | -3 | 3277.29 | 620.195 | 4  |
| -1 | 15  | 3  | 475.666 | 380.635 | 8  |
| 1  | 15  | 3  | 641.957 | 311.603 | 8  |
| -1 | 16  | 3  | 1094.64 | 413.793 | 8  |
| 1  | 16  | 3  | 1032.45 | 398.834 | 8  |
| 1  | 17  | -3 | 1318.95 | 365.486 | 8  |
| -1 | 17  | 3  | 1476.76 | 465.795 | 8  |
| 1  | 17  | 3  | 879.079 | 373.280 | 8  |
| 1  | 18  | -3 | 141.503 | 212.997 | 8  |
| -1 | 18  | 3  | 31.3951 | 287.310 | 8  |
| 1  | 18  | 3  | 249.429 | 251.688 | 8  |
| 1  | 19  | 3  | 2020.03 | 417.235 | 8  |
| 1  | 19  | -3 | 2142.26 | 379.522 | 8  |
| -1 | 19  | 3  | 1710.42 | 395.491 | 8  |
| 1  | 20  | 3  | 607.240 | 267.912 | 8  |
| -2 | 0   | -3 | 106374. | 2784.24 | 2  |
| 2  | 0   | 3  | 109140. | 1897.37 | 3  |
| 2  | 0   | -3 | 112049. | 2380.64 | 5  |
| 2  | 1   | 3  | 323935. | 3390.36 | 3  |
| 2  | 1   | -3 | 330302. | 4241.31 | 5  |
| 2  | -1  | -3 | 324737. | 4006.17 | 5  |
| -2 | 1   | -3 | 329550. | 4635.33 | 2  |
| 2  | -1  | 3  | 331611. | 3167.76 | 3  |
| -2 | 2   | -3 | 48817.1 | 1707.19 | 2  |
| 2  | -2  | -3 | 49814.4 | 1557.62 | 5  |
| 2  | -2  | 3  | 48811.1 | 1154.98 | 3  |
| -2 | 3   | 3  | 209290. | 3683.07 | 3  |
| 2  | -3  | -3 | 216712. | 3344.40 | 5  |
| -2 | 3   | -3 | 209651. | 3324.97 | 2  |
| -2 | 4   | 3  | 4209.56 | 567.291 | 3  |

|    |     |    |         |         |    |
|----|-----|----|---------|---------|----|
| 2  | -4  | -3 | 5277.54 | 574.836 | 5  |
| -2 | 5   | 3  | 179352. | 3459.22 | 3  |
| 2  | -5  | -3 | 181286. | 3425.10 | 5  |
| 2  | -5  | 3  | 187411. | 4747.06 | 5  |
| 2  | -6  | 3  | 49130.7 | 2662.59 | 5  |
| -2 | 6   | 3  | 48370.2 | 1706.43 | 3  |
| 2  | -6  | -3 | 46478.2 | 1849.84 | 5  |
| 2  | -7  | 3  | 183974. | 5567.80 | 5  |
| 2  | -7  | -3 | 174244. | 3839.06 | 5  |
| -2 | 8   | -3 | 15761.9 | 1026.94 | 4  |
| 2  | -8  | -3 | 15627.0 | 1247.43 | 5  |
| 2  | -8  | 3  | 13974.9 | 1714.66 | 5  |
| -2 | 9   | -3 | 64410.7 | 2163.02 | 4  |
| 2  | -9  | -3 | 60216.3 | 2600.21 | 5  |
| 2  | -9  | 3  | 62556.8 | 3709.04 | 5  |
| 2  | -10 | -3 | 12591.4 | 1291.60 | 5  |
| -2 | 10  | -3 | 12360.5 | 971.469 | 4  |
| 2  | -10 | 3  | 12861.3 | 1854.87 | 5  |
| -2 | 11  | -3 | 69139.4 | 2383.23 | 4  |
| 2  | -11 | -3 | 67118.3 | 3116.55 | 5  |
| 2  | -11 | 3  | 69518.1 | 4342.43 | 5  |
| 2  | -12 | 3  | 3990.29 | 1152.59 | 5  |
| -2 | 12  | -3 | 4163.59 | 659.034 | 4  |
| 2  | 13  | -3 | 45452.8 | 2043.82 | 12 |
| -2 | 13  | -3 | 44830.7 | 2026.89 | 4  |
| -2 | 13  | 3  | 44909.8 | 2018.64 | 8  |
| 2  | 13  | 3  | 44878.3 | 1885.04 | 8  |
| 2  | -13 | 3  | 39757.2 | 3470.61 | 5  |
| 2  | 14  | -3 | 6662.74 | 822.708 | 12 |
| -2 | 14  | 3  | 6320.24 | 815.927 | 8  |
| 2  | 14  | 3  | 6717.06 | 775.220 | 8  |
| 2  | 15  | -3 | 17525.9 | 1299.70 | 12 |
| -2 | 15  | 3  | 16329.7 | 1313.04 | 8  |
| 2  | 15  | 3  | 15594.9 | 1191.72 | 8  |
| -2 | 16  | 3  | 1079.33 | 476.805 | 8  |
| 2  | 16  | 3  | 903.603 | 352.412 | 8  |
| -2 | 17  | 3  | 14633.0 | 1208.41 | 8  |
| 2  | 17  | 3  | 12506.0 | 1033.40 | 8  |
| 2  | 17  | -3 | 13031.8 | 1009.19 | 8  |
| 2  | 18  | -3 | 1067.19 | 323.214 | 8  |
| -2 | 18  | 3  | 520.731 | 317.846 | 8  |
| 2  | 18  | 3  | 1015.50 | 353.689 | 8  |
| 2  | 19  | 3  | 6187.21 | 623.973 | 8  |
| -2 | 19  | 3  | 7285.33 | 717.866 | 8  |
| 2  | 19  | -3 | 7291.30 | 637.943 | 8  |
| 2  | 20  | 3  | 919.539 | 278.962 | 8  |
| 3  | 0   | -3 | 48204.0 | 1837.38 | 5  |
| 3  | 1   | -3 | 1112.04 | 333.024 | 5  |
| 3  | -1  | -3 | 141.143 | 232.552 | 5  |
| 3  | -2  | -3 | 2851.84 | 463.388 | 5  |
| 3  | 2   | -3 | 2745.48 | 500.607 | 5  |
| 3  | -3  | -3 | 6993.89 | 717.832 | 5  |
| 3  | -4  | -3 | 30335.2 | 1512.28 | 5  |
| -3 | 5   | 3  | 58712.1 | 2121.69 | 3  |
| 3  | -5  | -3 | 53969.2 | 2117.24 | 5  |
| 3  | -6  | -3 | 12704.3 | 1103.76 | 5  |
| 3  | -7  | -3 | 5816.28 | 794.146 | 5  |
| 3  | -7  | 3  | 5815.13 | 1123.15 | 5  |

|    |     |    |          |         |    |
|----|-----|----|----------|---------|----|
| 3  | -8  | 3  | 554.223  | 543.138 | 5  |
| 3  | -8  | -3 | 1373.48  | 486.198 | 5  |
| 3  | -9  | -3 | 5806.47  | 916.287 | 5  |
| 3  | -9  | 3  | 5759.63  | 1277.86 | 5  |
| 3  | -10 | 3  | 1427.56  | 940.423 | 5  |
| 3  | -10 | -3 | 1136.69  | 455.190 | 5  |
| -3 | 10  | -3 | 669.926  | 337.004 | 4  |
| 3  | -11 | -3 | 1180.76  | 579.147 | 5  |
| 3  | -11 | 3  | -6.69172 | 639.895 | 5  |
| -3 | 11  | -3 | 411.770  | 294.295 | 4  |
| 3  | -12 | -3 | 510.882  | 564.182 | 5  |
| 3  | -12 | 3  | -497.901 | 758.855 | 5  |
| -3 | 12  | -3 | 137.444  | 243.053 | 4  |
| 3  | 13  | 3  | 1207.67  | 371.701 | 8  |
| 3  | -13 | 3  | 2440.03  | 998.009 | 5  |
| 3  | 13  | -3 | 1267.30  | 454.414 | 12 |
| -3 | 13  | -3 | 1234.37  | 455.737 | 4  |
| 3  | 14  | -3 | 3337.36  | 618.349 | 12 |
| 3  | 14  | 3  | 3500.65  | 573.727 | 8  |
| 3  | 15  | -3 | 5219.23  | 739.783 | 12 |
| 3  | 15  | 3  | 5317.59  | 669.242 | 8  |
| 3  | 16  | -3 | 592.468  | 319.011 | 12 |
| 3  | 16  | 3  | 535.660  | 294.389 | 8  |
| 3  | 17  | -3 | 129.534  | 219.481 | 8  |
| 3  | 17  | 3  | 28.8392  | 217.052 | 8  |
| 3  | 18  | -3 | -23.5601 | 196.609 | 8  |
| 3  | 18  | 3  | -60.2278 | 195.152 | 8  |
| 3  | 19  | -3 | 138.567  | 184.835 | 8  |
| 3  | 19  | 3  | -36.6343 | 168.259 | 8  |
| 4  | 0   | -3 | 76972.2  | 2658.65 | 5  |
| 4  | 1   | -3 | 55989.8  | 2298.70 | 5  |
| 4  | -1  | -3 | 52798.3  | 2152.65 | 5  |
| 4  | 2   | -3 | 72412.9  | 2731.27 | 5  |
| 4  | -2  | -3 | 70637.2  | 2527.04 | 5  |
| 4  | -3  | -3 | 47218.6  | 2088.35 | 5  |
| 4  | -4  | -3 | 37631.8  | 1896.56 | 5  |
| 4  | -5  | -3 | 41815.5  | 2080.15 | 5  |
| 4  | -6  | -3 | 61280.2  | 2605.98 | 5  |
| 4  | -7  | -3 | 23576.1  | 1714.58 | 5  |
| 4  | -8  | -3 | 23578.6  | 1786.68 | 5  |
| 4  | -9  | -3 | 19497.6  | 1720.93 | 5  |
| 4  | -10 | -3 | 24084.8  | 2002.13 | 5  |
| -4 | 11  | -3 | 28656.0  | 1719.46 | 4  |
| 4  | -11 | -3 | 25120.1  | 2114.43 | 5  |
| 4  | 12  | -3 | 8716.91  | 918.086 | 12 |
| -4 | 12  | -3 | 10634.4  | 1048.18 | 4  |
| 4  | -12 | -3 | 9486.83  | 1432.22 | 5  |
| 4  | 13  | -3 | 5898.38  | 768.734 | 12 |
| 4  | 14  | -3 | 9910.74  | 984.540 | 12 |
| 4  | 14  | 3  | 10321.9  | 889.101 | 8  |
| 4  | 15  | -3 | 4231.60  | 639.847 | 12 |
| 4  | 15  | 3  | 4470.69  | 599.133 | 8  |
| 4  | 16  | -3 | 3518.70  | 571.266 | 12 |
| 4  | 16  | 3  | 3740.06  | 514.552 | 8  |
| 4  | 17  | 3  | 4032.89  | 514.160 | 8  |
| 4  | 17  | -3 | 3896.14  | 511.031 | 8  |
| 4  | 18  | -3 | 1563.29  | 309.197 | 8  |
| 4  | 18  | 3  | 1744.27  | 333.065 | 8  |



|    |     |    |         |         |    |
|----|-----|----|---------|---------|----|
| 4  | 19  | -3 | 1964.69 | 298.183 | 8  |
| 5  | 0   | -3 | 14833.9 | 1326.64 | 5  |
| 5  | 1   | -3 | 1283.69 | 471.925 | 5  |
| 5  | -1  | -3 | 1518.59 | 479.348 | 5  |
| 5  | 2   | -3 | 6074.46 | 911.631 | 5  |
| 5  | -2  | -3 | 6294.01 | 873.580 | 5  |
| 5  | -3  | -3 | 1976.70 | 529.629 | 5  |
| 5  | -4  | -3 | 778.326 | 398.258 | 5  |
| 5  | -5  | -3 | 8159.51 | 1044.96 | 5  |
| 5  | -6  | -3 | 745.251 | 445.742 | 5  |
| 5  | -7  | -3 | 2128.24 | 583.366 | 5  |
| 5  | -8  | -3 | 3406.65 | 764.498 | 5  |
| 5  | -9  | -3 | 2144.80 | 662.740 | 5  |
| 5  | 10  | -3 | 5121.95 | 704.781 | 12 |
| 5  | -10 | -3 | 6313.52 | 1115.26 | 5  |
| 5  | -11 | -3 | 415.164 | 304.421 | 11 |
| 5  | -11 | -3 | 481.085 | 517.731 | 5  |
| 5  | 11  | -3 | 950.209 | 332.162 | 12 |
| -5 | 11  | -3 | 1028.69 | 427.371 | 4  |
| 5  | -12 | -3 | 269.526 | 246.576 | 11 |
| 5  | 12  | -3 | 635.503 | 317.250 | 12 |
| 5  | -13 | -3 | 89.0190 | 208.333 | 11 |
| 5  | 13  | -3 | 1814.29 | 455.384 | 12 |
| 5  | 14  | -3 | 170.032 | 242.754 | 12 |
| 5  | -14 | -3 | 77.0338 | 194.531 | 11 |
| 5  | -15 | -3 | 189.108 | 206.581 | 11 |
| 5  | 15  | -3 | 488.858 | 271.875 | 12 |
| 5  | -16 | -3 | 192.693 | 193.047 | 11 |
| 5  | 16  | -3 | 281.087 | 241.969 | 12 |
| 5  | 17  | -3 | 86.9395 | 162.955 | 8  |
| 5  | -17 | 3  | 81.8721 | 184.444 | 11 |
| 5  | 18  | -3 | 563.640 | 202.470 | 8  |
| 5  | -18 | 3  | 125.260 | 193.544 | 11 |
| 6  | 0   | -3 | 12691.0 | 1389.55 | 5  |
| 6  | -1  | -3 | 3066.90 | 737.117 | 5  |
| 6  | 1   | -3 | 3016.96 | 721.999 | 5  |
| 6  | 2   | -3 | 21356.9 | 1860.88 | 5  |
| 6  | -2  | -3 | 20825.0 | 1730.94 | 5  |
| 6  | -3  | -3 | 3229.28 | 720.147 | 5  |
| 6  | -4  | -3 | 18287.4 | 1673.33 | 5  |
| 6  | -5  | -3 | 3880.80 | 857.801 | 5  |
| 6  | -6  | -3 | 14983.8 | 1561.27 | 5  |
| 6  | -7  | -3 | 1573.79 | 641.761 | 5  |
| 6  | -8  | -3 | 5587.65 | 1053.63 | 5  |
| 6  | -9  | -3 | 1044.18 | 598.235 | 5  |
| 6  | 9   | -3 | 554.103 | 287.069 | 12 |
| 6  | -9  | -3 | 10.7837 | 212.391 | 11 |
| 6  | -10 | -3 | 532.391 | 250.305 | 11 |
| 6  | 10  | -3 | 9639.06 | 915.582 | 12 |
| 6  | -11 | -3 | 250.726 | 229.783 | 11 |
| 6  | 11  | -3 | 1576.19 | 396.527 | 12 |
| 6  | -12 | -3 | 112.628 | 208.368 | 11 |
| 6  | 12  | -3 | 2619.32 | 519.059 | 12 |
| 6  | -13 | -3 | 152.030 | 201.045 | 11 |
| 6  | -13 | 3  | 67.4108 | 267.856 | 11 |
| 6  | 13  | -3 | 530.953 | 294.207 | 12 |
| 6  | -14 | -3 | 10.6316 | 187.364 | 11 |
| 6  | -14 | 3  | 379.288 | 261.869 | 11 |

|   |     |    |          |         |    |
|---|-----|----|----------|---------|----|
| 6 | 15  | -3 | 1.46043  | 186.429 | 12 |
| 6 | -15 | -3 | -156.887 | 176.830 | 11 |
| 6 | -15 | 3  | 250.092  | 220.427 | 11 |
| 6 | -16 | -3 | 213.041  | 167.158 | 11 |
| 6 | -16 | 3  | 433.777  | 204.761 | 11 |
| 6 | 17  | -3 | 927.738  | 222.497 | 8  |
| 7 | 0   | -3 | 2282.75  | 723.856 | 5  |
| 7 | 1   | -3 | 1079.77  | 582.116 | 5  |
| 7 | -1  | -3 | 1083.88  | 502.129 | 5  |
| 7 | -2  | -3 | 2615.11  | 734.523 | 5  |
| 7 | -3  | -3 | 669.181  | 474.735 | 5  |
| 7 | -4  | -3 | 1626.27  | 687.347 | 5  |
| 7 | -5  | -3 | 1755.17  | 705.998 | 5  |
| 7 | -6  | -3 | 300.441  | 547.832 | 5  |
| 7 | -6  | -3 | 222.791  | 191.478 | 11 |
| 7 | 6   | -3 | -57.9154 | 277.884 | 12 |
| 7 | -7  | -3 | 118.658  | 524.499 | 5  |
| 7 | -7  | -3 | -43.1962 | 202.964 | 11 |
| 7 | 7   | -3 | -79.2497 | 302.175 | 12 |
| 7 | -8  | -3 | 316.980  | 227.676 | 11 |
| 7 | 8   | -3 | 995.327  | 343.984 | 12 |
| 7 | 9   | -3 | 566.867  | 274.944 | 12 |
| 7 | -9  | -3 | 6.11550  | 169.960 | 11 |
| 7 | 10  | -3 | 972.904  | 324.732 | 12 |
| 7 | -10 | -3 | -89.4683 | 199.465 | 11 |
| 7 | 11  | -3 | 66.8240  | 209.073 | 12 |
| 7 | -11 | -3 | -105.819 | 193.428 | 11 |
| 7 | 12  | -3 | 90.6754  | 217.952 | 12 |
| 7 | -12 | -3 | 53.8789  | 180.777 | 11 |
| 7 | -13 | -3 | -248.528 | 201.617 | 11 |
| 7 | 13  | -3 | 64.6683  | 199.327 | 12 |
| 7 | -14 | -3 | 197.670  | 184.534 | 11 |
| 7 | 14  | -3 | -14.5516 | 185.985 | 12 |
| 7 | 15  | -3 | 93.8554  | 163.621 | 12 |
| 7 | -15 | -3 | 190.151  | 157.224 | 11 |
| 8 | 0   | -3 | 2357.09  | 816.154 | 5  |
| 8 | 0   | -3 | 291.912  | 241.166 | 11 |
| 8 | -1  | -3 | -44.1784 | 411.704 | 5  |
| 8 | 1   | -3 | 118.787  | 207.011 | 11 |
| 8 | -1  | -3 | -40.0896 | 228.783 | 11 |
| 8 | 2   | -3 | 509.078  | 264.494 | 11 |
| 8 | -2  | -3 | 394.488  | 250.298 | 11 |
| 8 | -3  | -3 | 233.006  | 729.950 | 5  |
| 8 | -3  | -3 | -288.838 | 220.966 | 11 |
| 8 | 3   | -3 | -77.8710 | 234.069 | 11 |
| 8 | -4  | -3 | 299.956  | 235.868 | 11 |
| 8 | -5  | -3 | -204.716 | 211.726 | 11 |
| 8 | -6  | -3 | 259.822  | 216.958 | 11 |
| 8 | 6   | -3 | 1211.87  | 351.442 | 12 |
| 8 | -7  | -3 | -35.8026 | 193.740 | 11 |
| 8 | 7   | -3 | -117.992 | 265.566 | 12 |
| 8 | -8  | -3 | -126.319 | 198.032 | 11 |
| 8 | 8   | -3 | 1236.55  | 371.255 | 12 |
| 8 | 9   | -3 | -8.30415 | 192.337 | 12 |
| 8 | -9  | -3 | 38.5149  | 191.614 | 11 |
| 8 | -10 | -3 | 168.486  | 190.493 | 11 |
| 8 | 10  | -3 | 1404.38  | 357.022 | 12 |
| 8 | 11  | -3 | -11.5832 | 203.442 | 12 |

|    |     |            |         |    |
|----|-----|------------|---------|----|
| 8  | -11 | -3-150.093 | 197.808 | 11 |
| 8  | 12  | -3 687.632 | 281.870 | 12 |
| 8  | -12 | -3-144.920 | 172.391 | 11 |
| 8  | 13  | -3-156.307 | 193.441 | 12 |
| 8  | -13 | -3-6.80614 | 144.297 | 11 |
| 8  | -14 | -3 40.7568 | 138.310 | 11 |
| 8  | 14  | -3 261.825 | 172.061 | 12 |
| 9  | 0   | -3-204.551 | 237.218 | 11 |
| 9  | 1   | -3 62.2177 | 195.176 | 11 |
| 9  | -1  | -3-156.701 | 213.149 | 11 |
| 9  | -2  | -3-191.257 | 222.191 | 11 |
| 9  | 2   | -3-99.6266 | 197.987 | 11 |
| 9  | -3  | -3 180.147 | 224.437 | 11 |
| 9  | -4  | -3-35.9183 | 180.212 | 11 |
| 9  | -4  | -3 438.853 | 242.391 | 6  |
| 9  | 4   | -3 473.327 | 225.144 | 6  |
| 9  | -5  | -3 111.133 | 186.982 | 11 |
| 9  | -5  | -3 802.007 | 263.684 | 6  |
| 9  | 5   | -3 578.861 | 226.093 | 6  |
| 9  | -6  | -3 345.177 | 230.623 | 11 |
| 9  | -7  | -3-162.737 | 189.758 | 11 |
| 9  | -8  | -3 135.170 | 188.025 | 11 |
| 9  | -9  | -3-55.8309 | 182.119 | 11 |
| 9  | -10 | -3-44.2844 | 170.864 | 11 |
| 9  | -11 | -3 169.282 | 165.863 | 11 |
| 9  | -12 | -3 358.937 | 172.659 | 11 |
| 10 | 0   | -3-53.9346 | 177.113 | 11 |
| 10 | 0   | -3 139.225 | 193.615 | 6  |
| 10 | -1  | -3-20.0891 | 167.582 | 11 |
| 10 | -1  | -3 139.463 | 181.280 | 6  |
| 10 | 1   | -3 76.7508 | 184.210 | 6  |
| 10 | -2  | -3 234.375 | 213.488 | 11 |
| 10 | -2  | -3 210.806 | 210.681 | 6  |
| 10 | 2   | -3 78.9001 | 200.253 | 6  |
| 10 | -3  | -3 181.381 | 182.073 | 11 |
| 10 | -3  | -3 400.013 | 215.246 | 6  |
| 10 | 3   | -3 290.405 | 191.135 | 6  |
| 10 | -4  | -3-27.6286 | 171.105 | 11 |
| 10 | -4  | -3 16.3920 | 166.065 | 6  |
| 10 | 4   | -3-20.3108 | 158.372 | 6  |
| 10 | 5   | -3-5.88445 | 178.096 | 6  |
| 10 | -5  | -3 35.2285 | 158.733 | 11 |
| 10 | -5  | -3-31.0253 | 199.165 | 6  |
| 10 | -6  | -3-20.2291 | 177.515 | 11 |
| 10 | -7  | -3-458.187 | 219.386 | 11 |
| 10 | -8  | -3 85.2548 | 156.477 | 11 |
| 10 | -9  | -3 397.222 | 181.812 | 11 |
| 10 | -10 | -3 149.161 | 142.450 | 11 |
| 11 | 0   | -3 145.726 | 200.033 | 6  |
| 11 | -1  | -3 152.440 | 157.612 | 6  |
| 11 | 1   | -3-11.2973 | 165.605 | 6  |
| 11 | -2  | -3-60.6828 | 175.936 | 6  |
| 11 | 2   | -3 78.5885 | 186.409 | 6  |
| 11 | -3  | -3 101.075 | 150.268 | 11 |
| 11 | -3  | -3-23.3984 | 138.854 | 6  |
| 11 | 3   | -3-47.4146 | 153.965 | 6  |
| 11 | -4  | -3 190.703 | 165.414 | 11 |
| 11 | 4   | -3 220.499 | 191.277 | 6  |

|    |     |    |          |         |    |
|----|-----|----|----------|---------|----|
| 11 | -4  | -3 | 121.464  | 155.210 | 6  |
| 11 | -5  | -3 | 250.706  | 163.252 | 11 |
| 11 | -6  | -3 | -32.4395 | 131.364 | 11 |
| 0  | 0   | 4  | 15709.7  | 1056.09 | 3  |
| 0  | 1   | -4 | 2.79170  | 95.7875 | 4  |
| 0  | 1   | 4  | -67.2336 | 258.252 | 3  |
| 0  | -1  | 4  | -26.1048 | 222.894 | 3  |
| 0  | -1  | 4  | -81.4794 | 283.331 | 2  |
| 0  | 2   | -4 | 1002.26  | 184.873 | 4  |
| 0  | -2  | 4  | 890.965  | 307.913 | 3  |
| 0  | 2   | 4  | 979.589  | 322.778 | 3  |
| 0  | 3   | -4 | -28.3313 | 117.984 | 4  |
| 0  | -3  | 4  | 246.999  | 226.455 | 3  |
| 0  | 3   | 4  | -84.1054 | 195.140 | 3  |
| 0  | -4  | 4  | 61843.3  | 1995.12 | 3  |
| 0  | 4   | 4  | 59264.8  | 1934.83 | 3  |
| 0  | 4   | -4 | 60344.7  | 1567.43 | 4  |
| 0  | 5   | -4 | 381.323  | 179.033 | 4  |
| 0  | 5   | 4  | -39.2157 | 195.554 | 3  |
| 0  | 6   | -4 | 96641.6  | 2249.70 | 4  |
| 0  | 6   | 4  | 92366.2  | 2340.64 | 3  |
| 0  | 7   | 4  | 70.8936  | 158.928 | 3  |
| 0  | 7   | -4 | 903.137  | 275.370 | 4  |
| 0  | 8   | 4  | 310.654  | 201.876 | 3  |
| 0  | 8   | -4 | 299.138  | 177.123 | 4  |
| 0  | 9   | -4 | -28.6878 | 185.467 | 4  |
| 0  | 10  | -4 | 767.796  | 289.904 | 4  |
| 0  | 11  | -4 | -107.651 | 205.365 | 4  |
| 0  | 12  | -4 | 430.672  | 218.363 | 4  |
| 0  | -12 | 4  | 1382.48  | 832.840 | 5  |
| 0  | 13  | -4 | 142.333  | 215.115 | 4  |
| 0  | 13  | 4  | -15.1916 | 337.158 | 8  |
| 0  | 14  | 4  | 25423.7  | 1595.03 | 8  |
| 0  | 15  | 4  | 27.6192  | 320.597 | 8  |
| 0  | 16  | 4  | 2250.97  | 541.935 | 8  |
| 0  | 17  | 4  | 121.055  | 297.537 | 8  |
| 0  | 18  | 4  | -137.826 | 253.007 | 8  |
| 0  | 19  | 4  | 31.1689  | 214.825 | 8  |
| -1 | 0   | 4  | 427546.  | 5787.77 | 3  |
| 1  | 0   | 4  | 442386.  | 4987.91 | 3  |
| -1 | -1  | 4  | 9555.35  | 873.890 | 3  |
| 1  | -1  | 4  | 10358.3  | 767.187 | 3  |
| 1  | 1   | 4  | 10178.4  | 774.998 | 3  |
| -1 | 1   | 4  | 10057.3  | 911.996 | 3  |
| -1 | -2  | 4  | 192096.  | 3790.45 | 3  |
| -1 | 2   | 4  | 190471.  | 3875.77 | 3  |
| 1  | -2  | 4  | 199813.  | 3186.84 | 3  |
| 1  | 2   | 4  | 192801.  | 3336.43 | 3  |
| -1 | -3  | 4  | 7802.54  | 775.249 | 3  |
| -1 | 3   | 4  | 7527.99  | 777.977 | 3  |
| 1  | -3  | 4  | 8324.32  | 638.185 | 3  |
| 1  | 3   | 4  | 7575.79  | 671.179 | 3  |
| -1 | 3   | -4 | 7503.39  | 530.575 | 4  |
| -1 | 4   | 4  | 222909.  | 4010.92 | 3  |
| -1 | 4   | -4 | 215898.  | 2979.73 | 4  |
| 1  | 4   | 4  | 223057.  | 3561.57 | 3  |
| 1  | 4   | -4 | 223306.  | 2969.62 | 4  |
| 1  | 5   | -4 | 1318.05  | 266.606 | 4  |

|    |     |    |          |         |   |
|----|-----|----|----------|---------|---|
| -1 | 5   | 4  | 1219.56  | 350.731 | 3 |
| 1  | 5   | 4  | 1121.52  | 290.117 | 3 |
| -1 | 5   | -4 | 1093.73  | 259.060 | 4 |
| -1 | 6   | 4  | 216330.  | 3740.20 | 3 |
| -1 | 6   | -4 | 207623.  | 3289.49 | 4 |
| 1  | 6   | -4 | 216013.  | 3268.34 | 4 |
| 1  | 6   | 4  | 216171.  | 3541.96 | 3 |
| -1 | 7   | -4 | 4243.51  | 521.705 | 4 |
| -1 | 7   | 4  | 4223.07  | 540.806 | 3 |
| 1  | 7   | -4 | 4214.11  | 499.883 | 4 |
| -1 | 8   | -4 | 106263.  | 2605.46 | 4 |
| 1  | 8   | -4 | 113349.  | 2616.66 | 4 |
| 1  | -9  | 4  | 7408.69  | 1280.79 | 5 |
| -1 | 9   | -4 | 6676.65  | 699.549 | 4 |
| 1  | 9   | -4 | 7534.62  | 729.164 | 4 |
| 1  | -10 | 4  | 55653.4  | 3526.45 | 5 |
| -1 | 10  | -4 | 52473.6  | 1989.95 | 4 |
| 1  | 10  | -4 | 53421.7  | 1962.56 | 4 |
| 1  | 11  | -4 | -10.4551 | 215.640 | 4 |
| 1  | -11 | 4  | 633.418  | 555.288 | 5 |
| -1 | 11  | -4 | 302.970  | 234.742 | 4 |
| 1  | -12 | 4  | 71445.1  | 4210.36 | 5 |
| -1 | 12  | -4 | 75369.8  | 2573.86 | 4 |
| -1 | 13  | -4 | 2773.08  | 519.889 | 4 |
| 1  | -13 | 4  | 1733.23  | 878.943 | 5 |
| 1  | 13  | 4  | 2718.92  | 554.626 | 8 |
| -1 | 13  | 4  | 2760.79  | 599.082 | 8 |
| -1 | 14  | 4  | 19992.3  | 1446.61 | 8 |
| 1  | 14  | 4  | 19166.1  | 1363.53 | 8 |
| -1 | 15  | 4  | 2.33918  | 318.566 | 8 |
| 1  | 15  | 4  | -76.6796 | 299.449 | 8 |
| -1 | 16  | 4  | 21166.9  | 1475.17 | 8 |
| 1  | 16  | 4  | 18984.5  | 1358.89 | 8 |
| 1  | 17  | -4 | 455.117  | 269.370 | 8 |
| -1 | 17  | 4  | 121.995  | 303.233 | 8 |
| 1  | 17  | 4  | 529.458  | 308.036 | 8 |
| -1 | 18  | 4  | 6084.67  | 733.684 | 8 |
| 1  | 18  | 4  | 5770.01  | 684.414 | 8 |
| 1  | 18  | -4 | 7211.33  | 655.239 | 8 |
| 1  | 19  | 4  | 199.811  | 198.227 | 8 |
| 2  | 0   | -4 | 24058.9  | 1161.68 | 5 |
| 2  | 0   | 4  | 26000.4  | 1111.32 | 3 |
| -2 | 1   | 4  | 54838.8  | 2118.13 | 3 |
| 2  | -1  | -4 | 51360.4  | 1670.05 | 5 |
| 2  | -1  | 4  | 57316.7  | 1599.19 | 3 |
| 2  | 1   | 4  | 56928.4  | 1687.97 | 3 |
| -2 | 2   | 4  | 17741.0  | 1230.96 | 3 |
| -2 | 2   | -4 | 14993.0  | 717.451 | 4 |
| 2  | -2  | -4 | 16983.8  | 948.004 | 5 |
| 2  | -2  | 4  | 18317.1  | 876.785 | 3 |
| 2  | 2   | 4  | 17383.2  | 968.762 | 3 |
| 2  | 3   | 4  | 7215.08  | 647.995 | 3 |
| -2 | 3   | -4 | 6355.49  | 504.738 | 4 |
| -2 | 3   | 4  | 6633.46  | 767.844 | 3 |
| -2 | 4   | -4 | 3453.75  | 407.280 | 4 |
| -2 | 4   | 4  | 4295.46  | 633.853 | 3 |
| -2 | 5   | 4  | 27996.1  | 1473.40 | 3 |
| -2 | 5   | -4 | 26699.8  | 1149.77 | 4 |

|    |    |    |          |         |    |
|----|----|----|----------|---------|----|
| -2 | 6  | 4  | 16647.9  | 1126.49 | 3  |
| -2 | 6  | -4 | 14321.5  | 884.132 | 4  |
| -2 | 7  | -4 | 6916.73  | 643.846 | 4  |
| -2 | 8  | -4 | 3549.98  | 508.691 | 4  |
| -2 | 9  | -4 | 10115.5  | 869.976 | 4  |
| -2 | 10 | -4 | 3493.52  | 566.861 | 4  |
| -2 | 11 | -4 | 3892.36  | 604.172 | 4  |
| 2  | 12 | -4 | 1903.21  | 599.791 | 12 |
| -2 | 12 | -4 | 2104.98  | 485.600 | 4  |
| -2 | 12 | 4  | 2206.94  | 569.017 | 8  |
| 2  | 12 | 4  | 1947.60  | 503.570 | 8  |
| 2  | 13 | -4 | 350.798  | 389.533 | 12 |
| -2 | 13 | 4  | 187.000  | 358.989 | 8  |
| 2  | 13 | 4  | 200.447  | 272.844 | 8  |
| 2  | 14 | -4 | 2557.94  | 558.472 | 12 |
| -2 | 14 | 4  | 2099.93  | 559.675 | 8  |
| 2  | 14 | 4  | 1697.23  | 429.400 | 8  |
| 2  | 15 | -4 | 1767.80  | 446.447 | 12 |
| -2 | 15 | 4  | 1279.50  | 467.175 | 8  |
| 2  | 15 | 4  | 1503.63  | 418.852 | 8  |
| -2 | 16 | 4  | 805.237  | 405.571 | 8  |
| 2  | 16 | 4  | 521.447  | 272.276 | 8  |
| -2 | 17 | 4  | -67.4991 | 268.239 | 8  |
| 2  | 17 | 4  | 244.606  | 262.254 | 8  |
| 2  | 18 | -4 | 179.002  | 222.329 | 8  |
| 2  | 18 | 4  | 151.865  | 197.677 | 8  |
| 2  | 19 | -4 | 1502.48  | 291.713 | 8  |
| 2  | 19 | 4  | 1475.03  | 303.669 | 8  |
| 3  | 0  | -4 | 237588.  | 4210.41 | 5  |
| 3  | 1  | -4 | 56550.8  | 2137.05 | 5  |
| 3  | -1 | -4 | 55708.2  | 2018.73 | 5  |
| 3  | -2 | -4 | 33071.5  | 1552.67 | 5  |
| -3 | 3  | 4  | 43392.7  | 1995.69 | 3  |
| 3  | -3 | -4 | 38730.0  | 1696.99 | 5  |
| -3 | 4  | 4  | 118133.  | 3294.70 | 3  |
| 3  | -4 | -4 | 111703.  | 2920.97 | 5  |
| -3 | 5  | 4  | 30783.6  | 1671.81 | 3  |
| 3  | -5 | -4 | 29726.6  | 1561.89 | 5  |
| -3 | 6  | 4  | 67285.1  | 2360.19 | 3  |
| 3  | -6 | -4 | 65132.3  | 2392.50 | 5  |
| -3 | 7  | -4 | 25515.3  | 1313.28 | 4  |
| 3  | -7 | -4 | 25070.9  | 1563.60 | 5  |
| -3 | 8  | -4 | 39824.2  | 1710.98 | 4  |
| -3 | 9  | -4 | 19051.5  | 1224.81 | 4  |
| -3 | 10 | -4 | 41391.6  | 1829.54 | 4  |
| -3 | 11 | -4 | 10273.0  | 957.678 | 4  |
| 3  | 12 | -4 | 28407.7  | 1650.10 | 12 |
| -3 | 12 | -4 | 29921.7  | 1672.24 | 4  |
| -3 | 12 | 4  | 29524.5  | 1707.06 | 8  |
| 3  | 12 | 4  | 29475.4  | 1501.66 | 8  |
| 3  | 13 | -4 | 7709.98  | 872.211 | 12 |
| -3 | 13 | 4  | 8234.46  | 938.309 | 8  |
| 3  | 13 | 4  | 7809.93  | 821.724 | 8  |
| 3  | 14 | -4 | 8294.94  | 913.976 | 12 |
| -3 | 14 | 4  | 7766.39  | 908.290 | 8  |
| 3  | 14 | 4  | 8031.18  | 825.621 | 8  |
| 3  | 15 | -4 | 3158.10  | 570.375 | 12 |
| -3 | 15 | 4  | 3206.89  | 612.386 | 8  |

|    |    |    |          |         |    |
|----|----|----|----------|---------|----|
| 3  | 15 | 4  | 3133.93  | 547.646 | 8  |
| 3  | 16 | -4 | 10533.0  | 919.573 | 12 |
| 3  | 16 | 4  | 8757.18  | 822.847 | 8  |
| 3  | 17 | 4  | 1681.00  | 377.325 | 8  |
| 3  | 18 | 4  | 3696.96  | 469.117 | 8  |
| 3  | 18 | -4 | 5146.75  | 539.690 | 8  |
| -3 | 19 | 4  | 86.8556  | 313.207 | 7  |
| 4  | 0  | -4 | 33129.2  | 1818.52 | 5  |
| 4  | 1  | -4 | 3656.49  | 652.699 | 5  |
| 4  | -1 | -4 | 3325.21  | 584.913 | 5  |
| 4  | -2 | -4 | 9344.85  | 947.878 | 5  |
| 4  | -3 | -4 | 2676.62  | 533.520 | 5  |
| -4 | 4  | 4  | 9.80254  | 295.397 | 3  |
| 4  | -4 | -4 | 29.1356  | 249.687 | 5  |
| -4 | 5  | 4  | 51.7755  | 278.130 | 3  |
| 4  | -5 | -4 | -79.5026 | 240.711 | 5  |
| 4  | -6 | -4 | 1730.72  | 477.735 | 5  |
| 4  | -7 | -4 | 6843.90  | 928.370 | 5  |
| 4  | -8 | -4 | 4994.76  | 825.816 | 5  |
| 4  | -9 | -4 | 507.388  | 462.431 | 5  |
| -4 | 9  | -4 | 594.851  | 316.534 | 4  |
| -4 | 10 | -4 | 16348.9  | 1209.83 | 4  |
| 4  | 11 | -4 | 147.146  | 297.687 | 12 |
| -4 | 11 | -4 | -100.752 | 258.360 | 4  |
| 4  | 12 | -4 | 496.655  | 344.152 | 12 |
| 4  | 13 | -4 | 1478.68  | 445.808 | 12 |
| 4  | 14 | -4 | 1501.25  | 413.361 | 12 |
| 4  | 15 | -4 | -119.015 | 208.169 | 12 |
| 4  | 16 | -4 | 61.7624  | 247.705 | 12 |
| 4  | 16 | 4  | 188.118  | 227.689 | 8  |
| 4  | 17 | -4 | -49.5483 | 194.563 | 8  |
| 4  | 17 | 4  | 103.043  | 196.164 | 8  |
| 4  | 18 | -4 | 871.980  | 245.714 | 8  |
| -4 | 18 | 4  | 309.522  | 388.373 | 7  |
| 5  | 0  | -4 | 12709.5  | 1274.85 | 5  |
| 5  | 1  | -4 | 22563.1  | 1726.36 | 5  |
| 5  | -1 | -4 | 20146.7  | 1566.54 | 5  |
| 5  | -2 | -4 | 6355.81  | 907.455 | 5  |
| 5  | -3 | -4 | 32771.5  | 1966.35 | 5  |
| 5  | -4 | -4 | 8966.34  | 1071.17 | 5  |
| 5  | -5 | -4 | 20636.4  | 1614.27 | 5  |
| 5  | -6 | -4 | 8525.13  | 1065.40 | 5  |
| 5  | -7 | -4 | 17014.0  | 1544.52 | 5  |
| 5  | -8 | -4 | 3799.41  | 772.713 | 5  |
| -5 | 9  | -4 | 11949.1  | 1062.15 | 4  |
| 5  | -9 | -4 | 10627.4  | 1302.90 | 5  |
| 5  | 9  | -4 | 10566.6  | 1010.57 | 12 |
| -5 | 10 | -4 | 4455.70  | 711.433 | 4  |
| 5  | 10 | -4 | 4374.40  | 685.285 | 12 |
| 5  | 11 | -4 | 6698.72  | 839.671 | 12 |
| 5  | 12 | -4 | 3470.81  | 600.994 | 12 |
| 5  | 13 | -4 | 4294.78  | 663.191 | 12 |
| 5  | 14 | -4 | 755.534  | 337.224 | 12 |
| 5  | 15 | -4 | 3639.58  | 540.032 | 12 |
| 5  | 16 | -4 | 1120.58  | 316.280 | 12 |
| 5  | 17 | -4 | 1551.90  | 302.028 | 8  |
| 6  | 0  | -4 | 271.201  | 402.614 | 5  |
| 6  | 1  | -4 | 359.212  | 416.355 | 5  |

|   |     |    |          |         |    |
|---|-----|----|----------|---------|----|
| 6 | -1  | -4 | 513.692  | 353.437 | 5  |
| 6 | -2  | -4 | -6.52951 | 343.883 | 5  |
| 6 | -3  | -4 | 4839.16  | 876.762 | 5  |
| 6 | -4  | -4 | 1390.29  | 548.648 | 5  |
| 6 | -5  | -4 | 9636.76  | 1245.88 | 5  |
| 6 | -6  | -4 | -10.5248 | 324.458 | 5  |
| 6 | -7  | -4 | 582.397  | 411.065 | 5  |
| 6 | 7   | -4 | 973.586  | 374.350 | 12 |
| 6 | -7  | -4 | 133.749  | 266.884 | 11 |
| 6 | -8  | -4 | 618.433  | 446.647 | 5  |
| 6 | -8  | -4 | -137.370 | 234.587 | 11 |
| 6 | 8   | -4 | -18.7640 | 253.212 | 12 |
| 6 | -9  | -4 | -34.9932 | 191.922 | 11 |
| 6 | 9   | -4 | 93.9030  | 245.452 | 12 |
| 6 | -10 | -4 | -5.40510 | 174.484 | 11 |
| 6 | 10  | -4 | -26.7892 | 220.981 | 12 |
| 6 | 11  | -4 | 89.8348  | 221.422 | 12 |
| 6 | -11 | -4 | -197.626 | 203.078 | 11 |
| 6 | 12  | -4 | 34.2294  | 208.790 | 12 |
| 6 | -12 | -4 | 23.9695  | 167.463 | 11 |
| 6 | -13 | -4 | -185.296 | 183.860 | 11 |
| 6 | 13  | -4 | 1030.31  | 332.717 | 12 |
| 6 | 14  | -4 | 12.5533  | 221.449 | 12 |
| 6 | 15  | -4 | 1018.27  | 294.436 | 12 |
| 6 | 16  | -4 | 6.38383  | 156.429 | 8  |
| 7 | 0   | -4 | 143.208  | 462.458 | 5  |
| 7 | -1  | -4 | 5614.07  | 1087.23 | 5  |
| 7 | -2  | -4 | 237.217  | 355.759 | 5  |
| 7 | -3  | -4 | 6508.49  | 733.884 | 10 |
| 7 | 3   | -4 | 1527.97  | 376.130 | 11 |
| 7 | -3  | -4 | 850.339  | 302.141 | 11 |
| 7 | 3   | -4 | 4725.11  | 692.625 | 10 |
| 7 | -3  | -4 | 8982.04  | 1258.83 | 5  |
| 7 | -4  | -4 | -227.788 | 479.920 | 5  |
| 7 | 4   | -4 | -469.196 | 283.958 | 12 |
| 7 | -4  | -4 | -84.8820 | 184.440 | 11 |
| 7 | -4  | -4 | -60.0505 | 222.653 | 10 |
| 7 | 4   | -4 | 79.0709  | 244.484 | 10 |
| 7 | -5  | -4 | 3239.81  | 819.965 | 5  |
| 7 | 5   | -4 | 3866.23  | 630.724 | 12 |
| 7 | 6   | -4 | 1278.06  | 426.136 | 12 |
| 7 | -6  | -4 | -377.246 | 215.943 | 11 |
| 7 | 7   | -4 | 2339.56  | 513.718 | 12 |
| 7 | -7  | -4 | 296.794  | 214.626 | 11 |
| 7 | 8   | -4 | -111.042 | 243.159 | 12 |
| 7 | -8  | -4 | 128.636  | 180.226 | 11 |
| 7 | -9  | -4 | 409.675  | 220.027 | 11 |
| 7 | 9   | -4 | 3245.76  | 568.180 | 12 |
| 7 | 10  | -4 | 5.61329  | 235.218 | 12 |
| 7 | -10 | -4 | -72.9666 | 173.958 | 11 |
| 7 | 11  | -4 | 1114.17  | 373.280 | 12 |
| 7 | -11 | -4 | 224.869  | 186.849 | 11 |
| 7 | 12  | -4 | 140.485  | 204.642 | 12 |
| 7 | -12 | -4 | -160.010 | 181.832 | 11 |
| 7 | 13  | -4 | 1291.05  | 338.155 | 12 |
| 7 | -13 | -4 | -207.839 | 169.939 | 11 |
| 7 | -14 | -4 | 68.3777  | 150.401 | 11 |
| 7 | 14  | -4 | 116.454  | 177.274 | 12 |



|    |     |    |          |         |    |
|----|-----|----|----------|---------|----|
| 7  | 15  | -4 | 539.242  | 209.817 | 12 |
| 8  | 0   | -4 | 21.0749  | 195.843 | 11 |
| 8  | 1   | -4 | 54.0979  | 188.719 | 11 |
| 8  | -1  | -4 | -102.875 | 188.789 | 11 |
| 8  | 2   | -4 | 395.875  | 295.667 | 12 |
| 8  | 2   | -4 | -144.552 | 206.704 | 11 |
| 8  | -2  | -4 | 122.339  | 202.379 | 11 |
| 8  | 3   | -4 | 434.354  | 275.002 | 12 |
| 8  | -3  | -4 | -159.755 | 194.396 | 11 |
| 8  | 4   | -4 | 640.180  | 314.310 | 12 |
| 8  | -4  | -4 | 354.828  | 224.476 | 11 |
| 8  | -5  | -4 | 147.939  | 189.762 | 11 |
| 8  | 5   | -4 | 343.259  | 309.342 | 12 |
| 8  | 6   | -4 | 136.050  | 224.894 | 12 |
| 8  | -6  | -4 | 322.834  | 218.026 | 11 |
| 8  | 7   | -4 | 203.092  | 229.937 | 12 |
| 8  | -7  | -4 | -329.590 | 204.372 | 11 |
| 8  | -8  | -4 | -111.657 | 170.257 | 11 |
| 8  | 8   | -4 | 193.637  | 266.989 | 12 |
| 8  | 9   | -4 | 243.945  | 208.072 | 12 |
| 8  | -9  | -4 | -230.615 | 190.786 | 11 |
| 8  | -10 | -4 | 159.684  | 176.432 | 11 |
| 8  | 10  | -4 | 478.135  | 256.961 | 12 |
| 8  | 11  | -4 | 298.426  | 233.480 | 12 |
| 8  | -11 | -4 | 123.064  | 163.906 | 11 |
| 8  | 12  | -4 | 192.234  | 190.805 | 12 |
| 8  | -12 | -4 | 151.889  | 154.837 | 11 |
| 8  | 13  | -4 | -12.4181 | 143.226 | 12 |
| 8  | -13 | -4 | 66.3167  | 145.991 | 11 |
| 9  | 0   | -4 | -249.645 | 225.564 | 11 |
| 9  | 1   | -4 | -45.1916 | 188.533 | 11 |
| 9  | -1  | -4 | 17.3300  | 190.412 | 11 |
| 9  | -2  | -4 | 195.795  | 211.714 | 11 |
| 9  | -3  | -4 | 76.7536  | 166.206 | 11 |
| 9  | -4  | -4 | 50.5136  | 173.352 | 11 |
| 9  | -5  | -4 | -92.3757 | 172.964 | 11 |
| 9  | -5  | -4 | 387.509  | 234.098 | 6  |
| 9  | 5   | -4 | 313.132  | 228.425 | 6  |
| 9  | -6  | -4 | -162.272 | 183.190 | 11 |
| 9  | 6   | -4 | -36.8991 | 243.394 | 12 |
| 9  | 7   | -4 | 407.456  | 267.464 | 12 |
| 9  | -7  | -4 | -163.186 | 179.595 | 11 |
| 9  | 8   | -4 | 97.1991  | 198.707 | 12 |
| 9  | -8  | -4 | -39.2057 | 161.182 | 11 |
| 9  | 9   | -4 | 69.3182  | 204.890 | 12 |
| 9  | -9  | -4 | 42.8712  | 149.863 | 11 |
| 9  | -10 | -4 | -170.311 | 158.822 | 11 |
| 9  | 10  | -4 | 148.557  | 185.984 | 12 |
| 9  | 11  | -4 | -2.80853 | 190.057 | 12 |
| 9  | -11 | -4 | 161.856  | 145.397 | 11 |
| 10 | 0   | -4 | -72.3124 | 195.857 | 6  |
| 10 | -1  | -4 | 349.125  | 210.170 | 11 |
| 10 | -1  | -4 | 385.880  | 224.203 | 6  |
| 10 | 1   | -4 | 324.367  | 225.927 | 6  |
| 10 | -2  | -4 | -265.538 | 213.979 | 11 |
| 10 | -2  | -4 | 32.2226  | 190.025 | 6  |
| 10 | 2   | -4 | 62.7068  | 188.065 | 6  |
| 10 | -3  | -4 | -40.9368 | 163.404 | 11 |

|    |    |    |          |         |    |
|----|----|----|----------|---------|----|
| 10 | -3 | -4 | 184.120  | 176.756 | 6  |
| 10 | 3  | -4 | -60.9389 | 163.851 | 6  |
| 10 | -4 | -4 | -39.1416 | 166.351 | 11 |
| 10 | -4 | -4 | 179.977  | 176.412 | 6  |
| 10 | 4  | -4 | -159.332 | 175.435 | 6  |
| 10 | -5 | -4 | -159.776 | 177.730 | 11 |
| 10 | -5 | -4 | 56.8728  | 177.540 | 6  |
| 10 | 5  | -4 | 26.3975  | 158.594 | 6  |
| 10 | -6 | -4 | 130.415  | 165.639 | 11 |
| 10 | -7 | -4 | -193.086 | 157.676 | 11 |
| 10 | -8 | -4 | 37.3368  | 135.372 | 11 |
| 10 | -9 | -4 | -163.872 | 137.901 | 11 |
| 11 | 0  | -4 | 12.3382  | 169.936 | 6  |
| 11 | -1 | -4 | 76.7169  | 153.108 | 6  |
| 11 | 1  | -4 | 52.1388  | 163.131 | 6  |
| 11 | -2 | -4 | 186.435  | 161.615 | 6  |
| 11 | 2  | -4 | 126.030  | 152.250 | 6  |
| 11 | -3 | -4 | 18.4994  | 163.799 | 6  |
| 11 | 3  | -4 | -47.1436 | 153.072 | 6  |
| 0  | 0  | 5  | -43.9882 | 243.666 | 3  |
| 0  | -1 | 5  | 66992.7  | 2320.61 | 3  |
| 0  | 1  | 5  | 68678.2  | 2359.63 | 3  |
| 0  | -2 | 5  | 146.700  | 209.110 | 3  |
| 0  | 2  | 5  | 62.0348  | 222.184 | 3  |
| 0  | -3 | 5  | 71256.3  | 2302.82 | 3  |
| 0  | 3  | 5  | 68282.1  | 2304.23 | 3  |
| 0  | 3  | -5 | 64415.9  | 1549.80 | 4  |
| 0  | 4  | -5 | 22.7810  | 135.504 | 4  |
| 0  | 4  | 5  | 18.8089  | 191.891 | 3  |
| 0  | 5  | 5  | 109357.  | 2894.65 | 3  |
| 0  | 5  | -5 | 100788.  | 2200.37 | 4  |
| 0  | 6  | -5 | 61.0028  | 144.975 | 4  |
| 0  | 6  | 5  | -25.0483 | 204.757 | 3  |
| 0  | 7  | -5 | 45106.0  | 1617.25 | 4  |
| 0  | 7  | 5  | 46936.7  | 1851.11 | 3  |
| 0  | 8  | -5 | 66.5614  | 171.160 | 4  |
| 0  | 8  | 5  | -112.481 | 173.326 | 3  |
| 0  | 9  | -5 | 27631.0  | 1377.19 | 4  |
| 0  | 10 | -5 | 102.099  | 225.429 | 4  |
| 0  | 11 | -5 | 28333.3  | 1472.90 | 4  |
| 0  | 12 | -5 | -552.476 | 278.281 | 4  |
| 0  | 12 | 5  | 88.9118  | 309.524 | 8  |
| 0  | 13 | 5  | 17600.3  | 1326.74 | 8  |
| 0  | 14 | 5  | -98.9613 | 260.904 | 8  |
| 0  | 15 | 5  | 7266.94  | 879.885 | 8  |
| 0  | 16 | 5  | -115.343 | 236.742 | 8  |
| 0  | 17 | 5  | 6247.23  | 725.335 | 8  |
| -1 | 0  | 5  | 28327.6  | 1636.78 | 3  |
| 1  | 0  | 5  | 28301.1  | 1406.63 | 3  |
| -1 | 1  | 5  | 51150.6  | 2160.74 | 3  |
| -1 | -1 | 5  | 52058.5  | 2191.05 | 3  |
| 1  | -1 | 5  | 57306.3  | 1965.82 | 3  |
| 1  | 1  | 5  | 54325.6  | 1983.40 | 3  |
| -1 | -2 | 5  | 9992.67  | 973.557 | 3  |
| -1 | 2  | 5  | 9181.39  | 916.653 | 3  |
| 1  | -2 | 5  | 10890.6  | 852.497 | 3  |
| 1  | 2  | 5  | 10298.9  | 885.351 | 3  |
| -1 | 3  | 5  | 85439.1  | 2744.12 | 3  |

|    |    |    |          |         |   |
|----|----|----|----------|---------|---|
| -1 | -3 | 5  | 91635.5  | 2866.16 | 3 |
| 1  | 3  | 5  | 92250.1  | 2587.24 | 3 |
| -1 | 3  | -5 | 89461.8  | 1890.18 | 4 |
| -1 | -4 | 5  | 5956.99  | 759.268 | 3 |
| -1 | 4  | 5  | 6038.14  | 738.699 | 3 |
| -1 | 4  | -5 | 6497.32  | 558.431 | 4 |
| 1  | 4  | 5  | 6280.04  | 693.118 | 3 |
| -1 | 5  | 5  | 99084.2  | 2814.36 | 3 |
| -1 | 5  | -5 | 99710.7  | 2245.05 | 4 |
| 1  | 5  | 5  | 103653.  | 2745.93 | 3 |
| -1 | 6  | 5  | 229.657  | 226.388 | 3 |
| 1  | 6  | 5  | -53.5934 | 184.885 | 3 |
| -1 | 6  | -5 | 225.308  | 175.978 | 4 |
| -1 | 7  | 5  | 81429.1  | 2475.85 | 3 |
| -1 | 7  | -5 | 79757.2  | 2211.94 | 4 |
| -1 | 8  | -5 | 7218.33  | 717.928 | 4 |
| -1 | 8  | 5  | 7446.38  | 761.006 | 3 |
| -1 | 9  | -5 | 12850.4  | 979.338 | 4 |
| -1 | 10 | -5 | 4931.60  | 634.570 | 4 |
| -1 | 11 | -5 | 10143.1  | 905.878 | 4 |
| -1 | 11 | 5  | 9187.21  | 1003.20 | 8 |
| -1 | 12 | -5 | 692.500  | 354.734 | 4 |
| -1 | 12 | 5  | 429.581  | 362.292 | 8 |
| 1  | 12 | 5  | 704.741  | 323.488 | 8 |
| -1 | 13 | 5  | 32282.2  | 1814.54 | 8 |
| 1  | 13 | 5  | 33027.6  | 1775.51 | 8 |
| -1 | 14 | 5  | -367.530 | 311.108 | 8 |
| 1  | 14 | 5  | 103.897  | 275.618 | 8 |
| -1 | 15 | 5  | 10502.9  | 1063.92 | 8 |
| 1  | 15 | 5  | 10196.5  | 994.627 | 8 |
| -1 | 16 | 5  | 52.1129  | 261.286 | 8 |
| 1  | 16 | 5  | -341.557 | 274.691 | 8 |
| -1 | 17 | 5  | 3495.86  | 586.017 | 8 |
| 1  | 17 | 5  | 3638.86  | 543.185 | 8 |
| 1  | 17 | -5 | 3985.38  | 510.338 | 8 |
| 1  | 18 | 5  | 203.712  | 277.121 | 7 |
| 1  | 18 | 5  | 276.536  | 220.315 | 8 |
| -1 | 19 | 5  | -199.928 | 316.942 | 7 |
| -2 | 0  | 5  | 545.581  | 368.660 | 3 |
| 2  | 0  | 5  | 318.922  | 197.918 | 3 |
| -2 | -1 | 5  | 88620.9  | 2994.84 | 3 |
| 2  | -1 | 5  | 95756.5  | 2373.03 | 3 |
| 2  | 1  | 5  | 94258.3  | 2495.50 | 3 |
| -2 | -2 | 5  | 30430.8  | 1759.70 | 3 |
| -2 | 2  | 5  | 28334.2  | 1697.01 | 3 |
| 2  | -2 | 5  | 32015.3  | 1326.08 | 3 |
| 2  | 2  | 5  | 33308.8  | 1522.44 | 3 |
| -2 | -3 | 5  | 44208.1  | 2084.54 | 3 |
| -2 | 3  | 5  | 43641.6  | 2085.13 | 3 |
| 2  | 3  | 5  | 48263.4  | 1866.42 | 3 |
| -2 | -4 | 5  | 1807.01  | 487.620 | 3 |
| -2 | 4  | 5  | 1588.88  | 431.380 | 3 |
| -2 | 4  | -5 | 1586.47  | 302.192 | 4 |
| -2 | -5 | 5  | 81154.0  | 2764.79 | 3 |
| -2 | 5  | 5  | 79009.6  | 2659.73 | 3 |
| -2 | 5  | -5 | 80130.6  | 2058.99 | 4 |
| -2 | 6  | 5  | 3038.59  | 528.801 | 3 |
| -2 | 6  | -5 | 3017.40  | 446.027 | 4 |

|    |    |    |          |         |    |
|----|----|----|----------|---------|----|
| -2 | 7  | 5  | 40274.0  | 1798.24 | 3  |
| -2 | 7  | -5 | 38099.8  | 1551.27 | 4  |
| -2 | 8  | -5 | 5133.49  | 613.202 | 4  |
| -2 | 9  | -5 | 21016.9  | 1236.62 | 4  |
| -2 | 10 | -5 | 5166.08  | 652.083 | 4  |
| -2 | 11 | -5 | 32377.7  | 1638.44 | 4  |
| -2 | 11 | 5  | 32705.9  | 1758.31 | 8  |
| 2  | 11 | 5  | 31111.5  | 1573.24 | 8  |
| -2 | 12 | 5  | 2513.97  | 561.333 | 8  |
| 2  | 12 | 5  | 1875.58  | 470.738 | 8  |
| -2 | 13 | 5  | 7740.41  | 939.150 | 8  |
| 2  | 13 | 5  | 7513.46  | 842.578 | 8  |
| -2 | 14 | 5  | -11.1293 | 327.192 | 8  |
| 2  | 14 | 5  | 764.419  | 388.791 | 8  |
| -2 | 15 | 5  | 7413.83  | 887.990 | 8  |
| 2  | 15 | 5  | 6479.90  | 787.687 | 8  |
| 2  | 16 | 5  | 252.664  | 271.775 | 8  |
| 2  | 17 | 5  | 4180.27  | 544.370 | 8  |
| 2  | 18 | -5 | 511.777  | 236.515 | 8  |
| 2  | 18 | 5  | 564.138  | 217.074 | 8  |
| -3 | 1  | 5  | 60029.5  | 2624.67 | 3  |
| -3 | 2  | 5  | 8922.46  | 1014.82 | 3  |
| -3 | 3  | 5  | 25893.3  | 1709.54 | 3  |
| -3 | 4  | 5  | 280.817  | 336.804 | 3  |
| -3 | 5  | 5  | 8312.02  | 934.909 | 3  |
| -3 | 5  | -5 | 7432.60  | 640.414 | 4  |
| -3 | 6  | 5  | 6394.31  | 805.100 | 3  |
| -3 | 6  | -5 | 5425.07  | 584.497 | 4  |
| -3 | 7  | -5 | 17166.8  | 1065.38 | 4  |
| -3 | 8  | -5 | 10170.6  | 864.564 | 4  |
| -3 | 9  | -5 | 24499.6  | 1393.48 | 4  |
| 3  | 10 | -5 | 9440.84  | 1014.55 | 12 |
| -3 | 10 | -5 | 9036.00  | 879.502 | 4  |
| 3  | 11 | -5 | 22129.9  | 1442.58 | 12 |
| -3 | 11 | -5 | 19324.0  | 1276.29 | 4  |
| 3  | 12 | -5 | 2925.77  | 559.602 | 12 |
| 3  | 13 | -5 | 2033.39  | 474.946 | 12 |
| 3  | 13 | 5  | 2253.87  | 493.385 | 8  |
| 3  | 14 | -5 | 636.203  | 328.280 | 12 |
| 3  | 14 | 5  | 242.725  | 272.146 | 8  |
| 3  | 15 | -5 | 1433.58  | 398.487 | 12 |
| 3  | 15 | 5  | 1013.06  | 325.684 | 8  |
| 3  | 16 | 5  | 360.078  | 232.757 | 8  |
| -3 | 17 | 5  | 484.481  | 394.125 | 7  |
| 3  | 17 | 5  | 2279.99  | 377.876 | 8  |
| 3  | 18 | -5 | 688.060  | 228.390 | 8  |
| -3 | 18 | 5  | 480.797  | 366.240 | 7  |
| 4  | 0  | -5 | 11996.7  | 1149.99 | 5  |
| 4  | -1 | -5 | 22424.2  | 1494.65 | 5  |
| -4 | 2  | 5  | 21425.7  | 1699.02 | 3  |
| 4  | -2 | -5 | 18480.6  | 1357.27 | 5  |
| -4 | 3  | 5  | 10134.7  | 1181.48 | 3  |
| -4 | 4  | 5  | 21103.9  | 1646.30 | 3  |
| -4 | 5  | 5  | 12646.6  | 1236.91 | 3  |
| -4 | 6  | -5 | 11495.2  | 887.461 | 4  |
| -4 | 7  | -5 | 14753.5  | 1027.69 | 4  |
| -4 | 8  | -5 | 6734.29  | 728.306 | 4  |
| -4 | 9  | -5 | 5956.38  | 723.577 | 4  |

|    |    |    |          |         |    |
|----|----|----|----------|---------|----|
| 4  | 9  | -5 | 5182.10  | 728.238 | 12 |
| 4  | 10 | -5 | 9376.61  | 982.556 | 12 |
| -4 | 10 | -5 | 8759.00  | 890.898 | 4  |
| 4  | 11 | -5 | 8269.51  | 914.942 | 12 |
| 4  | 12 | -5 | 1819.65  | 464.532 | 12 |
| 4  | 13 | -5 | 2572.85  | 540.595 | 12 |
| 4  | 14 | -5 | 3709.06  | 578.766 | 12 |
| 4  | 15 | -5 | 836.595  | 297.233 | 12 |
| -4 | 15 | 5  | 728.388  | 450.647 | 7  |
| -4 | 16 | 5  | 74.6080  | 346.480 | 7  |
| 4  | 16 | -5 | 818.471  | 268.614 | 12 |
| -4 | 17 | 5  | -114.357 | 302.562 | 7  |
| 4  | 17 | -5 | 1532.91  | 314.467 | 8  |
| 5  | 0  | -5 | 6754.58  | 980.810 | 5  |
| 5  | -1 | -5 | 9645.60  | 1126.86 | 5  |
| 5  | -2 | -5 | 5050.31  | 834.612 | 5  |
| -5 | 3  | 5  | 5161.23  | 941.822 | 3  |
| 5  | -3 | -5 | 4345.26  | 770.135 | 5  |
| -5 | 4  | 5  | 25742.0  | 1957.89 | 3  |
| 5  | -4 | -5 | 18368.0  | 1520.45 | 5  |
| -5 | 5  | 5  | 151.317  | 422.587 | 3  |
| 5  | -5 | -5 | 749.722  | 447.045 | 5  |
| 5  | 7  | -5 | 1976.05  | 560.970 | 12 |
| -5 | 7  | -5 | 1359.22  | 367.235 | 4  |
| 5  | 8  | -5 | 1862.92  | 506.063 | 12 |
| -5 | 8  | -5 | 1605.21  | 422.860 | 4  |
| 5  | 9  | -5 | 6590.48  | 822.769 | 12 |
| 5  | 10 | -5 | 1600.35  | 456.443 | 12 |
| 5  | 11 | -5 | 4555.27  | 690.225 | 12 |
| 5  | 12 | -5 | 1530.29  | 463.499 | 12 |
| 5  | 13 | -5 | 202.929  | 271.866 | 12 |
| 5  | 14 | -5 | 2741.79  | 482.227 | 12 |
| 5  | 15 | -5 | 26.3813  | 200.456 | 12 |
| 5  | 16 | -5 | 1538.26  | 325.094 | 12 |
| 6  | 0  | -5 | 2704.62  | 765.089 | 5  |
| 6  | -1 | -5 | 995.311  | 490.576 | 5  |
| 6  | -2 | -5 | 11966.5  | 1342.75 | 5  |
| -6 | 3  | 5  | 1516.41  | 797.996 | 3  |
| 6  | -3 | -5 | 142.048  | 403.213 | 5  |
| -6 | 4  | 5  | 8552.29  | 1325.50 | 3  |
| 6  | -4 | -5 | 4814.45  | 878.019 | 5  |
| 6  | -5 | -5 | 786.973  | 460.713 | 5  |
| 6  | 5  | -5 | 546.610  | 298.468 | 12 |
| 6  | 6  | -5 | 4260.23  | 676.928 | 12 |
| 6  | 7  | -5 | 964.971  | 374.470 | 12 |
| 6  | 8  | -5 | 3103.63  | 586.352 | 12 |
| 6  | 9  | -5 | 95.9659  | 248.790 | 12 |
| 6  | 10 | -5 | 2106.84  | 495.927 | 12 |
| 6  | 11 | -5 | 86.8376  | 237.011 | 12 |
| 6  | 12 | -5 | 1039.48  | 363.409 | 12 |
| 6  | 13 | -5 | 504.485  | 282.764 | 12 |
| 6  | 14 | -5 | 1479.60  | 344.788 | 12 |
| 6  | 15 | -5 | 119.841  | 196.323 | 12 |
| 7  | 0  | -5 | 358.304  | 237.967 | 11 |
| 7  | 0  | -5 | 109.156  | 253.015 | 10 |
| 7  | 1  | -5 | -134.849 | 221.115 | 11 |
| 7  | -1 | -5 | -41.9239 | 207.113 | 11 |
| 7  | -1 | -5 | 159.322  | 243.428 | 10 |

|   |     |    |          |         |    |
|---|-----|----|----------|---------|----|
| 7 | 1   | -5 | 156.114  | 213.949 | 10 |
| 7 | -2  | -5 | 2064.36  | 915.265 | 5  |
| 7 | 2   | -5 | 234.378  | 232.586 | 11 |
| 7 | -2  | -5 | 263.708  | 218.997 | 11 |
| 7 | -2  | -5 | 1680.43  | 413.345 | 10 |
| 7 | 2   | -5 | 1239.56  | 409.993 | 10 |
| 7 | -3  | -5 | 257.602  | 199.936 | 11 |
| 7 | -3  | -5 | -16.9400 | 224.228 | 10 |
| 7 | 3   | -5 | 14.0525  | 249.484 | 10 |
| 7 | -4  | -5 | 5265.02  | 639.404 | 10 |
| 7 | 4   | -5 | 3299.48  | 541.781 | 10 |
| 7 | 4   | -5 | 3640.81  | 628.628 | 12 |
| 7 | 5   | -5 | 471.498  | 284.402 | 12 |
| 7 | -5  | -5 | 141.751  | 187.583 | 11 |
| 7 | -5  | -5 | 654.405  | 271.666 | 10 |
| 7 | 5   | -5 | 183.271  | 280.453 | 10 |
| 7 | 6   | -5 | 2744.45  | 569.866 | 12 |
| 7 | -6  | -5 | 412.110  | 219.796 | 11 |
| 7 | 7   | -5 | -159.758 | 269.424 | 12 |
| 7 | -7  | -5 | -156.105 | 178.220 | 11 |
| 7 | -8  | -5 | -451.791 | 211.485 | 11 |
| 7 | 8   | -5 | 359.613  | 290.786 | 12 |
| 7 | 9   | -5 | 38.6337  | 307.640 | 12 |
| 7 | 10  | -5 | 321.165  | 249.953 | 12 |
| 7 | 11  | -5 | -78.7537 | 223.815 | 12 |
| 7 | 12  | -5 | 593.729  | 238.888 | 12 |
| 7 | 13  | -5 | 311.706  | 219.376 | 12 |
| 7 | 14  | -5 | 735.941  | 229.910 | 12 |
| 8 | 0   | -5 | 140.758  | 189.188 | 11 |
| 8 | 1   | -5 | 223.641  | 209.145 | 11 |
| 8 | -1  | -5 | 30.9190  | 174.701 | 11 |
| 8 | 2   | -5 | 1871.16  | 476.830 | 12 |
| 8 | -2  | -5 | 208.198  | 197.809 | 11 |
| 8 | 3   | -5 | 88.5544  | 226.690 | 12 |
| 8 | -3  | -5 | -141.547 | 171.880 | 11 |
| 8 | 4   | -5 | 718.636  | 351.717 | 12 |
| 8 | -4  | -5 | 91.7963  | 168.230 | 11 |
| 8 | 5   | -5 | -75.9514 | 236.044 | 12 |
| 8 | -5  | -5 | 46.9267  | 159.612 | 11 |
| 8 | 6   | -5 | 247.354  | 266.542 | 12 |
| 8 | -6  | -5 | -380.693 | 199.080 | 11 |
| 8 | 7   | -5 | 340.348  | 262.778 | 12 |
| 8 | -7  | -5 | -68.7770 | 152.050 | 11 |
| 8 | 8   | -5 | 796.399  | 345.934 | 12 |
| 8 | -8  | -5 | 2.09107  | 143.723 | 11 |
| 8 | 9   | -5 | -33.1635 | 211.707 | 12 |
| 8 | -9  | -5 | -188.292 | 160.871 | 11 |
| 8 | -10 | -5 | -65.8086 | 145.577 | 11 |
| 8 | 10  | -5 | 486.050  | 243.823 | 12 |
| 8 | 11  | -5 | 175.116  | 198.788 | 12 |
| 8 | 12  | -5 | 135.095  | 175.260 | 12 |
| 9 | 0   | -5 | 115.953  | 235.739 | 12 |
| 9 | 0   | -5 | -220.242 | 193.151 | 11 |
| 9 | 1   | -5 | 184.265  | 274.345 | 12 |
| 9 | -1  | -5 | -299.537 | 199.415 | 11 |
| 9 | 2   | -5 | 316.666  | 271.930 | 12 |
| 9 | -2  | -5 | 271.602  | 191.841 | 11 |
| 9 | 3   | -5 | 514.642  | 320.913 | 12 |

|    |    |    |          |         |    |
|----|----|----|----------|---------|----|
| 9  | -3 | -5 | 8.16317  | 155.405 | 11 |
| 9  | 4  | -5 | 251.808  | 253.543 | 12 |
| 9  | -4 | -5 | 118.680  | 168.082 | 11 |
| 9  | -5 | -5 | 49.0543  | 152.406 | 11 |
| 9  | 5  | -5 | 64.5468  | 200.639 | 12 |
| 9  | 6  | -5 | -219.504 | 225.266 | 12 |
| 9  | -6 | -5 | 17.0819  | 136.033 | 11 |
| 9  | -7 | -5 | 18.6556  | 138.853 | 11 |
| 9  | 7  | -5 | 164.347  | 198.842 | 12 |
| 9  | 8  | -5 | 288.439  | 238.597 | 12 |
| 9  | -8 | -5 | 300.945  | 161.269 | 11 |
| 9  | 9  | -5 | 249.477  | 208.155 | 12 |
| 9  | -9 | -5 | 338.861  | 163.745 | 11 |
| 9  | 10 | -5 | 245.057  | 208.115 | 12 |
| 10 | 0  | -5 | 89.3016  | 192.698 | 6  |
| 10 | -1 | -5 | 98.6427  | 167.931 | 6  |
| 10 | 1  | -5 | -20.6871 | 170.215 | 6  |
| 10 | -2 | -5 | 213.224  | 187.815 | 6  |
| 10 | 2  | -5 | 174.665  | 192.041 | 6  |
| 10 | -3 | -5 | -7.42958 | 136.351 | 11 |
| 10 | -3 | -5 | 148.895  | 174.737 | 6  |
| 10 | 3  | -5 | 142.156  | 178.680 | 6  |
| 10 | -4 | -5 | -33.3758 | 141.515 | 11 |
| 10 | -4 | -5 | 133.133  | 149.919 | 6  |
| 10 | 4  | -5 | 0.82027  | 142.373 | 6  |
| 10 | -5 | -5 | 373.756  | 171.530 | 11 |
| 10 | -5 | -5 | -13.3093 | 147.005 | 6  |
| 10 | 5  | -5 | 68.5578  | 155.959 | 6  |
| 10 | -6 | -5 | -41.0254 | 138.575 | 11 |
| 10 | -7 | -5 | -156.379 | 163.298 | 11 |
| 0  | 0  | 6  | 63743.5  | 2388.73 | 3  |
| 0  | -1 | 6  | 314.499  | 309.485 | 3  |
| 0  | 1  | 6  | 25.8352  | 251.858 | 3  |
| 0  | -2 | 6  | 113231.  | 3124.87 | 3  |
| 0  | 2  | 6  | 115567.  | 3216.76 | 3  |
| 0  | -3 | 6  | 332.150  | 238.380 | 3  |
| 0  | 3  | 6  | -81.1725 | 295.049 | 3  |
| 0  | 4  | 6  | 129340.  | 3442.16 | 3  |
| 0  | 5  | 6  | 296.721  | 294.511 | 3  |
| 0  | 6  | 6  | 140510.  | 3454.65 | 3  |
| 0  | 6  | -6 | 137451.  | 2786.31 | 4  |
| 0  | 7  | -6 | 271.166  | 222.059 | 4  |
| 0  | 7  | 6  | 102.690  | 226.221 | 3  |
| 0  | 8  | -6 | 40875.4  | 1641.81 | 4  |
| 0  | 9  | -6 | -84.6539 | 197.226 | 4  |
| 0  | 10 | 6  | 12344.9  | 1096.95 | 8  |
| 0  | 11 | 6  | 372.798  | 359.696 | 8  |
| 0  | 12 | 6  | 32407.4  | 1787.50 | 8  |
| 0  | 13 | 6  | 338.829  | 300.948 | 8  |
| 0  | 14 | 6  | 17063.5  | 1286.98 | 8  |
| 0  | 15 | 6  | -77.1345 | 378.692 | 7  |
| 0  | 16 | 6  | 8872.82  | 870.537 | 7  |
| 0  | 17 | 6  | -56.4840 | 291.533 | 7  |
| -1 | 0  | 6  | 7656.57  | 898.153 | 3  |
| 1  | 0  | 6  | 8372.77  | 854.317 | 3  |
| -1 | -1 | 6  | -53.5778 | 242.681 | 3  |
| 1  | -1 | 6  | 218.860  | 213.620 | 3  |
| 1  | 1  | 6  | 88.0583  | 205.033 | 3  |

|    |    |            |         |   |
|----|----|------------|---------|---|
| -1 | 1  | 6-42.5256  | 300.780 | 3 |
| -1 | -2 | 6 4991.24  | 735.935 | 3 |
| -1 | 2  | 6 5516.09  | 775.914 | 3 |
| 1  | -2 | 6 4666.32  | 603.112 | 3 |
| 1  | 2  | 6 5861.79  | 724.483 | 3 |
| -1 | -3 | 6 356.698  | 319.884 | 3 |
| -1 | 3  | 6 193.469  | 267.649 | 3 |
| 1  | 3  | 6 129.893  | 211.884 | 3 |
| -1 | -4 | 6 18729.3  | 1339.93 | 3 |
| -1 | 4  | 6 19232.1  | 1343.91 | 3 |
| 1  | 4  | 6 21116.4  | 1357.93 | 3 |
| -1 | 5  | -6 33.3867 | 148.104 | 4 |
| -1 | 5  | 6-75.3899  | 240.701 | 3 |
| 1  | 5  | 6 235.740  | 267.311 | 3 |
| 1  | 6  | 6 4783.37  | 665.386 | 3 |
| -1 | 6  | 6 4709.11  | 665.875 | 3 |
| -1 | 6  | -6 3788.84 | 482.476 | 4 |
| -1 | 7  | -6 36.3010 | 191.901 | 4 |
| -1 | 7  | 6 200.568  | 268.675 | 3 |
| -1 | 8  | -6 3201.17 | 481.172 | 4 |
| -1 | 8  | 6 4094.02  | 603.265 | 3 |
| -1 | 9  | -6 775.677 | 294.681 | 4 |
| -1 | 10 | -6 1722.34 | 383.649 | 4 |
| -1 | 10 | 6 1693.61  | 512.887 | 8 |
| 1  | 10 | 6 1742.53  | 446.139 | 8 |
| -1 | 11 | 6 571.635  | 348.169 | 8 |
| 1  | 11 | 6 1026.58  | 381.891 | 8 |
| -1 | 12 | 6 4677.96  | 716.336 | 8 |
| 1  | 12 | 6 5088.93  | 734.366 | 8 |
| 1  | 13 | 6 365.796  | 281.941 | 8 |
| 1  | 14 | 6 300.372  | 308.861 | 8 |
| -1 | 15 | 6-561.846  | 487.035 | 7 |
| 1  | 15 | 6-131.183  | 362.077 | 7 |
| 1  | 15 | 6-103.244  | 234.642 | 8 |
| -1 | 16 | 6 599.025  | 336.427 | 7 |
| 1  | 16 | 6 519.870  | 298.443 | 7 |
| -1 | 17 | 6-10.9552  | 281.181 | 7 |
| 1  | 17 | 6-50.1094  | 259.963 | 7 |
| -1 | 18 | 6 106.467  | 254.558 | 7 |
| -2 | 0  | 6 117042.  | 3712.76 | 3 |
| 2  | 0  | 6 133277.  | 3183.44 | 3 |
| -2 | 1  | 6 39366.8  | 2141.44 | 3 |
| -2 | -1 | 6 40990.2  | 2194.06 | 3 |
| 2  | -1 | 6 46362.8  | 1831.00 | 3 |
| 2  | 1  | 6 47102.4  | 1946.41 | 3 |
| -2 | 2  | 6 39110.8  | 2057.86 | 3 |
| -2 | -2 | 6 40021.7  | 2161.77 | 3 |
| -2 | -3 | 6 4821.51  | 791.230 | 3 |
| -2 | 3  | 6 5145.89  | 768.392 | 3 |
| -2 | -4 | 6 69256.4  | 2787.62 | 3 |
| -2 | 4  | 6 65042.0  | 2595.71 | 3 |
| -2 | 5  | 6 578.095  | 329.102 | 3 |
| -2 | 6  | 6 52173.6  | 2225.84 | 3 |
| -2 | 6  | -6 53086.4 | 1794.65 | 4 |
| -2 | 7  | 6 7651.13  | 847.407 | 3 |
| -2 | 7  | -6 8237.41 | 745.638 | 4 |
| -2 | 8  | -6 27296.9 | 1393.84 | 4 |
| -2 | 9  | -6 16478.8 | 1092.88 | 4 |



|    |    |    |          |         |    |
|----|----|----|----------|---------|----|
| -2 | 10 | -6 | 23420.5  | 1308.52 | 4  |
| 2  | 10 | 6  | 24742.3  | 1411.51 | 8  |
| 2  | 11 | 6  | 4717.17  | 645.204 | 8  |
| 2  | 12 | 6  | 15215.8  | 1167.03 | 8  |
| 2  | 13 | 6  | 1640.07  | 433.410 | 8  |
| -2 | 14 | 6  | 5557.11  | 825.536 | 7  |
| 2  | 14 | 6  | 6444.10  | 755.760 | 8  |
| -2 | 15 | 6  | 39.4582  | 356.194 | 7  |
| 2  | 15 | 6  | -180.801 | 258.229 | 8  |
| -2 | 16 | 6  | 3335.79  | 594.903 | 7  |
| 2  | 17 | -6 | 340.378  | 218.382 | 8  |
| -2 | 17 | 6  | 299.183  | 298.544 | 7  |
| -3 | 0  | 6  | 19421.9  | 1636.24 | 3  |
| -3 | -1 | 6  | 1682.23  | 550.947 | 3  |
| -3 | 1  | 6  | 1454.72  | 517.701 | 3  |
| -3 | -2 | 6  | 5237.65  | 895.680 | 3  |
| -3 | 2  | 6  | 5066.77  | 865.269 | 3  |
| -3 | -3 | 6  | 3999.78  | 796.838 | 3  |
| -3 | 3  | 6  | 3796.22  | 744.293 | 3  |
| -3 | -4 | 6  | 4573.95  | 843.291 | 3  |
| -3 | 4  | 6  | 3692.75  | 705.023 | 3  |
| -3 | -5 | 6  | 2792.30  | 661.614 | 3  |
| -3 | 5  | 6  | 2186.03  | 541.586 | 3  |
| -3 | 6  | 6  | 5050.35  | 752.100 | 3  |
| -3 | 7  | 6  | 283.081  | 307.150 | 3  |
| -3 | 7  | -6 | 184.465  | 226.796 | 4  |
| -3 | 8  | 6  | 4227.98  | 895.930 | 7  |
| -3 | 8  | -6 | 3362.11  | 534.721 | 4  |
| 3  | 9  | -6 | 3335.49  | 636.199 | 12 |
| -3 | 9  | -6 | 3400.79  | 547.192 | 4  |
| -3 | 9  | 6  | 3083.84  | 698.652 | 7  |
| 3  | 10 | -6 | 1706.24  | 450.770 | 12 |
| -3 | 10 | 6  | 1161.01  | 487.831 | 7  |
| 3  | 11 | -6 | 2097.24  | 494.744 | 12 |
| -3 | 11 | 6  | 1128.97  | 563.599 | 7  |
| -3 | 12 | 6  | 1551.76  | 529.306 | 7  |
| 3  | 12 | -6 | 1869.93  | 426.042 | 12 |
| 3  | 13 | -6 | 131.358  | 250.257 | 12 |
| -3 | 13 | 6  | -397.880 | 471.528 | 7  |
| -3 | 14 | 6  | 446.450  | 426.585 | 7  |
| -3 | 15 | 6  | 291.329  | 366.587 | 7  |
| -3 | 16 | 6  | 118.740  | 302.408 | 7  |
| 3  | 17 | -6 | -45.3089 | 152.777 | 8  |
| -3 | 17 | 6  | 280.730  | 288.876 | 7  |
| -4 | 0  | 6  | 53985.4  | 2893.72 | 3  |
| -4 | -1 | 6  | 21496.9  | 1859.47 | 3  |
| -4 | 1  | 6  | 20854.4  | 1793.88 | 3  |
| -4 | -2 | 6  | 18130.4  | 1694.97 | 3  |
| -4 | 2  | 6  | 19557.2  | 1711.11 | 3  |
| -4 | -3 | 6  | 16144.2  | 1597.76 | 3  |
| -4 | 3  | 6  | 15123.4  | 1491.69 | 3  |
| -4 | -4 | 6  | 8688.46  | 1163.30 | 3  |
| -4 | 4  | 6  | 8607.29  | 1128.47 | 3  |
| -4 | -5 | 6  | 12872.6  | 1381.90 | 3  |
| -4 | 5  | 6  | 13365.5  | 1290.19 | 3  |
| -4 | -6 | 6  | 5629.71  | 935.218 | 3  |
| -4 | 6  | 6  | 5755.79  | 861.508 | 3  |
| -4 | 7  | 6  | 11144.3  | 1228.49 | 7  |

|    |    |    |          |         |    |
|----|----|----|----------|---------|----|
| 4  | 7  | -6 | 9465.69  | 952.834 | 12 |
| -4 | 8  | 6  | 14038.6  | 1341.50 | 7  |
| 4  | 8  | -6 | 12698.3  | 1125.42 | 12 |
| -4 | 9  | 6  | 5710.67  | 879.093 | 7  |
| 4  | 9  | -6 | 6556.83  | 830.890 | 12 |
| -4 | 10 | 6  | 14626.1  | 1313.96 | 7  |
| 4  | 10 | -6 | 14393.9  | 1179.93 | 12 |
| -4 | 11 | 6  | 4259.97  | 757.537 | 7  |
| 4  | 11 | -6 | 5279.07  | 712.759 | 12 |
| 4  | 12 | -6 | 4317.39  | 636.944 | 12 |
| -4 | 12 | 6  | 3275.47  | 673.387 | 7  |
| 4  | 13 | -6 | 2300.05  | 447.346 | 12 |
| -4 | 13 | 6  | 1222.44  | 491.302 | 7  |
| -4 | 14 | 6  | -36.9424 | 399.023 | 7  |
| 4  | 14 | -6 | 607.383  | 292.544 | 12 |
| 4  | 15 | -6 | 2097.47  | 373.596 | 12 |
| -4 | 15 | 6  | 1198.77  | 437.726 | 7  |
| -4 | 16 | 6  | 458.339  | 320.945 | 7  |
| -5 | 0  | 6  | 5183.43  | 1041.43 | 3  |
| -5 | 1  | 6  | 1849.74  | 650.733 | 3  |
| -5 | -1 | 6  | 1671.02  | 655.963 | 3  |
| -5 | 2  | 6  | 1381.94  | 610.507 | 3  |
| -5 | 3  | 6  | 3595.52  | 881.181 | 3  |
| -5 | 4  | 6  | 132.166  | 436.728 | 3  |
| -5 | 5  | 6  | 2954.42  | 839.054 | 3  |
| 5  | 5  | -6 | 2522.17  | 528.354 | 12 |
| 5  | 6  | -6 | 773.161  | 382.932 | 12 |
| 5  | 7  | -6 | 864.020  | 374.781 | 12 |
| 5  | 8  | -6 | 220.980  | 319.855 | 12 |
| 5  | 9  | -6 | 1075.02  | 400.072 | 12 |
| -5 | 10 | 6  | 231.636  | 431.772 | 7  |
| 5  | 10 | -6 | -140.875 | 252.145 | 12 |
| -5 | 11 | 6  | 268.257  | 394.340 | 7  |
| 5  | 11 | -6 | 618.699  | 286.980 | 12 |
| 5  | 12 | -6 | -206.745 | 313.422 | 12 |
| -5 | 12 | 6  | 491.783  | 435.452 | 7  |
| -5 | 13 | 6  | 781.600  | 404.757 | 7  |
| 5  | 13 | -6 | 273.135  | 220.480 | 12 |
| -5 | 14 | 6  | -104.985 | 342.955 | 7  |
| 5  | 14 | -6 | 6.40951  | 178.782 | 12 |
| 5  | 15 | -6 | 108.490  | 146.765 | 12 |
| -6 | 0  | 6  | 2029.69  | 759.636 | 3  |
| 6  | 0  | -6 | 904.117  | 366.781 | 10 |
| -6 | 1  | 6  | 3296.17  | 888.095 | 3  |
| -6 | -1 | 6  | 2681.33  | 754.549 | 3  |
| 6  | -1 | -6 | 1782.75  | 412.307 | 10 |
| 6  | 1  | -6 | 1851.33  | 444.607 | 10 |
| 6  | -2 | -6 | 889.826  | 348.907 | 10 |
| 6  | 2  | -6 | 1066.69  | 375.251 | 10 |
| 6  | -3 | -6 | 9102.14  | 831.574 | 10 |
| 6  | 3  | -6 | 7516.76  | 780.659 | 10 |
| 6  | -4 | -6 | 1078.60  | 360.998 | 10 |
| 6  | 4  | -6 | 760.907  | 325.145 | 10 |
| 6  | -5 | -6 | 8520.97  | 766.638 | 10 |
| 6  | 5  | -6 | 6702.39  | 722.141 | 10 |
| 6  | 5  | -6 | 8136.31  | 911.692 | 12 |
| 6  | 6  | -6 | 860.102  | 394.091 | 12 |
| 6  | 7  | -6 | 4363.33  | 692.947 | 12 |

|    |    |    |          |         |    |
|----|----|----|----------|---------|----|
| 6  | 8  | -6 | 484.247  | 279.598 | 12 |
| 6  | 9  | -6 | 1093.68  | 373.221 | 12 |
| 6  | 10 | -6 | 523.257  | 259.366 | 12 |
| 6  | 11 | -6 | 764.852  | 314.800 | 12 |
| 6  | 12 | -6 | 529.586  | 291.174 | 12 |
| 6  | 13 | -6 | 2374.06  | 423.597 | 12 |
| 6  | 14 | -6 | 100.583  | 181.241 | 12 |
| 7  | 0  | -6 | -35.7525 | 180.186 | 11 |
| 7  | 0  | -6 | 85.9113  | 262.734 | 10 |
| 7  | -1 | -6 | 285.912  | 225.461 | 10 |
| 7  | 1  | -6 | 21.9220  | 285.213 | 10 |
| 7  | -2 | -6 | -35.4845 | 263.892 | 10 |
| 7  | 2  | -6 | -290.634 | 327.415 | 10 |
| 7  | -3 | -6 | 583.974  | 252.057 | 10 |
| 7  | 3  | -6 | 222.139  | 268.540 | 10 |
| 7  | 4  | -6 | -168.877 | 252.856 | 12 |
| 7  | -4 | -6 | -420.424 | 293.091 | 10 |
| 7  | 4  | -6 | -135.669 | 246.360 | 10 |
| 7  | 5  | -6 | 226.295  | 298.063 | 12 |
| 7  | -5 | -6 | 166.894  | 219.444 | 10 |
| 7  | 5  | -6 | 38.4450  | 248.259 | 10 |
| 7  | 6  | -6 | 557.221  | 301.379 | 12 |
| 7  | 7  | -6 | 74.9247  | 209.981 | 12 |
| 7  | 8  | -6 | 126.596  | 295.613 | 12 |
| 7  | 9  | -6 | 158.242  | 207.418 | 12 |
| 7  | 10 | -6 | 100.905  | 212.450 | 12 |
| 7  | 11 | -6 | -28.8156 | 202.354 | 12 |
| 7  | 12 | -6 | 48.9672  | 163.195 | 12 |
| 7  | 13 | -6 | 23.5244  | 147.144 | 12 |
| 8  | -1 | -6 | 31.0904  | 146.922 | 11 |
| 8  | 2  | -6 | 63.9509  | 268.426 | 12 |
| 8  | -2 | -6 | -6.70584 | 143.919 | 11 |
| 8  | 3  | -6 | 1215.41  | 399.940 | 12 |
| 8  | -3 | -6 | 174.899  | 173.446 | 11 |
| 8  | 4  | -6 | -88.7732 | 248.331 | 12 |
| 8  | 5  | -6 | 635.737  | 341.169 | 12 |
| 8  | 6  | -6 | 67.7657  | 216.251 | 12 |
| 8  | 7  | -6 | 384.422  | 261.405 | 12 |
| 8  | 8  | -6 | -170.748 | 201.967 | 12 |
| 8  | 9  | -6 | 499.892  | 253.300 | 12 |
| 8  | 10 | -6 | 165.663  | 175.173 | 12 |
| 8  | 11 | -6 | 543.694  | 214.900 | 12 |
| 9  | 0  | -6 | 29.8336  | 217.204 | 12 |
| 9  | 1  | -6 | 127.532  | 236.245 | 12 |
| 9  | -1 | -6 | 58.8025  | 239.868 | 12 |
| 9  | 2  | -6 | 3.11680  | 254.971 | 12 |
| 9  | 3  | -6 | -69.8853 | 210.363 | 12 |
| 9  | 4  | -6 | -84.4668 | 215.875 | 12 |
| 9  | -4 | -6 | 166.360  | 161.311 | 11 |
| 9  | -5 | -6 | 232.190  | 156.706 | 11 |
| 9  | 5  | -6 | 112.339  | 201.578 | 12 |
| 9  | 6  | -6 | -40.4531 | 190.613 | 12 |
| 9  | 7  | -6 | 76.2619  | 179.314 | 12 |
| 9  | 8  | -6 | 5.99266  | 150.051 | 12 |
| 10 | 0  | -6 | 111.666  | 145.921 | 6  |
| 10 | -1 | -6 | 148.371  | 172.164 | 6  |
| 10 | 1  | -6 | 4.62000  | 146.196 | 6  |
| 10 | -2 | -6 | 124.037  | 147.129 | 6  |

|    |    |    |          |         |   |
|----|----|----|----------|---------|---|
| 10 | 2  | -6 | 45.6093  | 137.647 | 6 |
| 10 | -3 | -6 | 194.065  | 161.844 | 6 |
| 10 | 3  | -6 | -75.8165 | 142.352 | 6 |
| 0  | 0  | 7  | -97.7119 | 249.617 | 3 |
| 0  | -1 | 7  | 1380.69  | 410.891 | 3 |
| 0  | 1  | 7  | 2128.67  | 531.480 | 3 |
| 0  | -2 | 7  | -18.7825 | 291.802 | 3 |
| 0  | 2  | 7  | 19.9444  | 334.843 | 3 |
| 0  | 3  | 7  | 533.300  | 315.066 | 3 |
| 0  | 4  | 7  | -39.1034 | 291.206 | 3 |
| 0  | 5  | 7  | 394.030  | 294.995 | 3 |
| 0  | 6  | 7  | -34.3181 | 242.480 | 3 |
| 0  | 7  | 7  | 1925.28  | 483.023 | 3 |
| 0  | 8  | 7  | -87.9237 | 357.811 | 7 |
| 0  | 9  | 7  | 1195.37  | 406.509 | 7 |
| 0  | 10 | 7  | -263.954 | 415.974 | 7 |
| 0  | 11 | 7  | -16.2823 | 381.362 | 7 |
| 0  | 12 | 7  | -169.563 | 413.339 | 7 |
| 0  | 13 | 7  | 680.743  | 378.881 | 7 |
| 0  | 14 | 7  | 396.804  | 364.772 | 7 |
| 0  | 15 | 7  | -32.8035 | 286.578 | 7 |
| 0  | 16 | 7  | -27.4817 | 276.353 | 7 |
| -1 | 0  | 7  | 7006.17  | 894.176 | 3 |
| 1  | 0  | 7  | 7818.71  | 860.335 | 3 |
| -1 | -1 | 7  | 54544.8  | 2407.42 | 3 |
| -1 | 1  | 7  | 55331.6  | 2431.79 | 3 |
| 1  | -1 | 7  | 58432.4  | 2207.06 | 3 |
| 1  | 1  | 7  | 56314.0  | 2259.28 | 3 |
| -1 | -2 | 7  | 8130.74  | 939.353 | 3 |
| -1 | 2  | 7  | 7929.12  | 937.152 | 3 |
| 1  | -2 | 7  | 8354.34  | 835.613 | 3 |
| 1  | 2  | 7  | 7429.56  | 865.120 | 3 |
| -1 | -3 | 7  | 60289.6  | 2442.97 | 3 |
| -1 | 3  | 7  | 62718.1  | 2545.36 | 3 |
| 1  | 3  | 7  | 62748.4  | 2435.42 | 3 |
| -1 | 4  | 7  | -97.6057 | 295.232 | 3 |
| 1  | 4  | 7  | 422.537  | 329.441 | 3 |
| -1 | 5  | 7  | 76912.0  | 2776.20 | 3 |
| 1  | 5  | 7  | 82101.2  | 2837.51 | 3 |
| -1 | 6  | 7  | 1142.80  | 392.117 | 3 |
| -1 | 7  | 7  | 33774.5  | 1848.47 | 7 |
| -1 | 7  | 7  | 35119.5  | 1792.26 | 3 |
| 1  | 8  | 7  | 4336.69  | 742.224 | 7 |
| -1 | 8  | 7  | 3408.76  | 676.095 | 7 |
| -1 | 8  | 7  | 3643.45  | 629.728 | 3 |
| 1  | 9  | 7  | 15148.1  | 1201.07 | 7 |
| -1 | 9  | 7  | 15198.7  | 1307.21 | 7 |
| 1  | 10 | 7  | 2517.65  | 598.608 | 7 |
| -1 | 10 | 7  | 2023.68  | 552.343 | 7 |
| 1  | 11 | 7  | 16920.2  | 1283.96 | 7 |
| -1 | 11 | 7  | 16383.3  | 1343.76 | 7 |
| 1  | 12 | 7  | 568.023  | 365.610 | 7 |
| -1 | 12 | 7  | 831.878  | 407.590 | 7 |
| 1  | 13 | 7  | 8790.33  | 910.573 | 7 |
| -1 | 13 | 7  | 9458.68  | 1019.23 | 7 |
| 1  | 14 | 7  | -107.287 | 326.015 | 7 |
| -1 | 14 | 7  | -36.3370 | 313.712 | 7 |
| 1  | 15 | 7  | 4245.45  | 585.082 | 7 |

|    |    |   |          |         |   |
|----|----|---|----------|---------|---|
| -1 | 15 | 7 | 5601.41  | 710.678 | 7 |
| -1 | 16 | 7 | 489.507  | 318.815 | 7 |
| -2 | 0  | 7 | 255.704  | 332.814 | 3 |
| 2  | 0  | 7 | 108.331  | 236.327 | 3 |
| -2 | 1  | 7 | 392.093  | 289.008 | 3 |
| -2 | -1 | 7 | 283.200  | 363.375 | 3 |
| 2  | -1 | 7 | 332.996  | 201.828 | 3 |
| -2 | -2 | 7 | 72.3791  | 317.251 | 3 |
| -2 | 2  | 7 | -34.1412 | 281.247 | 3 |
| -2 | -3 | 7 | 977.412  | 397.827 | 3 |
| -2 | 3  | 7 | 1282.00  | 459.153 | 3 |
| -2 | -4 | 7 | 398.913  | 284.324 | 3 |
| -2 | 4  | 7 | 60.4051  | 314.283 | 3 |
| -2 | 5  | 7 | 523.978  | 294.036 | 3 |
| -2 | 6  | 7 | 1172.28  | 430.107 | 3 |
| -2 | 7  | 7 | 978.158  | 477.529 | 7 |
| -2 | 7  | 7 | 760.854  | 367.165 | 3 |
| -2 | 8  | 7 | 42.1805  | 450.114 | 7 |
| -2 | 9  | 7 | 597.080  | 467.183 | 7 |
| -2 | 10 | 7 | 47.1131  | 369.432 | 7 |
| -2 | 11 | 7 | -112.490 | 407.663 | 7 |
| -2 | 12 | 7 | 106.188  | 378.312 | 7 |
| -2 | 13 | 7 | -50.8606 | 350.636 | 7 |
| -2 | 14 | 7 | -224.471 | 366.858 | 7 |
| -2 | 15 | 7 | 589.021  | 373.646 | 7 |
| -2 | 16 | 7 | 237.275  | 302.579 | 7 |
| -3 | 0  | 7 | 18379.8  | 1620.71 | 3 |
| -3 | -1 | 7 | 37005.4  | 2305.53 | 3 |
| -3 | 1  | 7 | 34309.5  | 2178.89 | 3 |
| -3 | -2 | 7 | 14937.2  | 1498.90 | 3 |
| -3 | 2  | 7 | 14510.4  | 1398.62 | 3 |
| -3 | -3 | 7 | 17359.6  | 1591.70 | 3 |
| -3 | 3  | 7 | 15174.2  | 1400.29 | 3 |
| -3 | -4 | 7 | 7539.86  | 1077.13 | 3 |
| -3 | 4  | 7 | 6484.19  | 922.434 | 3 |
| -3 | 5  | 7 | 14888.4  | 1391.10 | 7 |
| -3 | 5  | 7 | 12148.1  | 1167.25 | 3 |
| -3 | 6  | 7 | 4860.58  | 843.241 | 7 |
| -3 | 6  | 7 | 4299.45  | 748.448 | 3 |
| -3 | 7  | 7 | 14663.0  | 1333.61 | 7 |
| -3 | 8  | 7 | 7653.74  | 1006.66 | 7 |
| -3 | 9  | 7 | 12464.6  | 1216.13 | 7 |
| -3 | 10 | 7 | 7537.00  | 947.239 | 7 |
| -3 | 11 | 7 | 9353.17  | 1045.44 | 7 |
| -3 | 12 | 7 | 1851.09  | 540.543 | 7 |
| -3 | 13 | 7 | 2576.79  | 558.354 | 7 |
| -3 | 14 | 7 | 560.952  | 388.372 | 7 |
| -3 | 15 | 7 | 1428.11  | 431.422 | 7 |
| -3 | 16 | 7 | 328.146  | 281.942 | 7 |
| -4 | 0  | 7 | 3291.06  | 810.518 | 3 |
| -4 | -1 | 7 | -153.865 | 399.562 | 3 |
| -4 | 1  | 7 | 103.509  | 361.000 | 3 |
| -4 | -2 | 7 | 811.181  | 575.315 | 3 |
| -4 | 2  | 7 | 1073.08  | 611.471 | 3 |
| -4 | 2  | 7 | 265.547  | 919.048 | 7 |
| -4 | -3 | 7 | 2854.79  | 807.810 | 3 |
| -4 | 3  | 7 | 2478.13  | 807.728 | 7 |
| -4 | 3  | 7 | 1729.62  | 579.350 | 3 |

|    |    |    |          |         |    |
|----|----|----|----------|---------|----|
| -4 | -4 | 7  | 423.714  | 440.845 | 3  |
| -4 | 4  | 7  | -208.747 | 559.960 | 7  |
| -4 | 4  | 7  | -228.347 | 447.740 | 3  |
| -4 | 5  | 7  | -178.607 | 607.622 | 7  |
| -4 | 5  | 7  | 267.982  | 457.756 | 3  |
| 4  | 5  | -7 | 451.000  | 281.090 | 12 |
| 4  | -5 | -7 | 68.8123  | 287.205 | 10 |
| -4 | 6  | 7  | -49.9843 | 413.785 | 7  |
| 4  | 6  | -7 | 126.053  | 277.809 | 12 |
| -4 | 7  | 7  | 101.002  | 439.918 | 7  |
| 4  | 7  | -7 | 85.3716  | 253.376 | 12 |
| -4 | 8  | 7  | 147.900  | 414.542 | 7  |
| 4  | 8  | -7 | -129.424 | 262.639 | 12 |
| -4 | 9  | 7  | -120.088 | 355.802 | 7  |
| 4  | 9  | -7 | 135.424  | 221.193 | 12 |
| -4 | 10 | 7  | 28.0572  | 348.694 | 7  |
| 4  | 10 | -7 | 181.552  | 237.673 | 12 |
| 4  | 11 | -7 | 29.1864  | 202.563 | 12 |
| -4 | 11 | 7  | -119.077 | 367.588 | 7  |
| -4 | 12 | 7  | 312.450  | 400.431 | 7  |
| 4  | 12 | -7 | 105.796  | 201.390 | 12 |
| 4  | 13 | -7 | 255.623  | 207.211 | 12 |
| -4 | 13 | 7  | 79.2166  | 307.136 | 7  |
| -4 | 14 | 7  | 76.6829  | 272.758 | 7  |
| -4 | 15 | 7  | -96.6511 | 270.393 | 7  |
| 5  | 0  | -7 | 1467.67  | 368.320 | 10 |
| 5  | -1 | -7 | 3590.52  | 579.069 | 10 |
| 5  | 1  | -7 | 3696.30  | 550.245 | 10 |
| 5  | -2 | -7 | 4516.27  | 594.250 | 10 |
| 5  | 2  | -7 | 4387.80  | 587.966 | 10 |
| 5  | -3 | -7 | 868.414  | 358.205 | 10 |
| 5  | 3  | -7 | 1400.62  | 382.043 | 10 |
| 5  | -4 | -7 | 5425.01  | 639.445 | 10 |
| 5  | 4  | -7 | 4343.35  | 602.901 | 10 |
| 5  | 5  | -7 | 1407.58  | 416.867 | 12 |
| 5  | -5 | -7 | 895.303  | 341.659 | 10 |
| 5  | 5  | -7 | 791.068  | 301.752 | 10 |
| -5 | 6  | 7  | 10886.0  | 1209.80 | 7  |
| 5  | 6  | -7 | 6770.34  | 827.381 | 12 |
| -5 | 7  | 7  | 4340.51  | 828.161 | 7  |
| 5  | 7  | -7 | 2536.93  | 531.676 | 12 |
| -5 | 8  | 7  | 4351.67  | 769.522 | 7  |
| 5  | 8  | -7 | 3141.49  | 565.626 | 12 |
| 5  | 9  | -7 | 2786.03  | 532.342 | 12 |
| -5 | 9  | 7  | 2606.76  | 589.380 | 7  |
| 5  | 10 | -7 | 2515.51  | 485.088 | 12 |
| -5 | 10 | 7  | 2856.84  | 582.928 | 7  |
| 5  | 11 | -7 | 2332.17  | 435.169 | 12 |
| -5 | 11 | 7  | 1469.04  | 449.952 | 7  |
| 5  | 12 | -7 | 1933.55  | 372.041 | 12 |
| -5 | 12 | 7  | 1744.27  | 452.833 | 7  |
| -5 | 13 | 7  | 355.498  | 332.617 | 7  |
| 5  | 13 | -7 | 792.688  | 258.407 | 12 |
| 6  | 0  | -7 | -231.449 | 246.104 | 10 |
| 6  | -1 | -7 | 117.592  | 252.333 | 10 |
| 6  | 1  | -7 | 105.670  | 209.647 | 10 |
| 6  | -2 | -7 | 94.9063  | 199.330 | 10 |
| 6  | 2  | -7 | -79.9381 | 238.499 | 10 |

|   |    |            |         |    |
|---|----|------------|---------|----|
| 6 | -3 | -7-585.224 | 291.297 | 10 |
| 6 | 3  | -7 201.745 | 311.814 | 10 |
| 6 | 4  | -7 372.336 | 300.101 | 12 |
| 6 | -4 | -7 117.521 | 228.094 | 10 |
| 6 | 4  | -7 220.199 | 283.057 | 10 |
| 6 | 5  | -7-94.5636 | 285.768 | 12 |
| 6 | -5 | -7 198.531 | 227.209 | 10 |
| 6 | 5  | -7-54.0838 | 233.412 | 10 |
| 6 | 6  | -7 25.6557 | 252.230 | 12 |
| 6 | 7  | -7 62.6345 | 232.054 | 12 |
| 6 | 8  | -7-243.110 | 295.271 | 12 |
| 6 | 9  | -7 225.492 | 265.022 | 12 |
| 6 | 10 | -7-108.820 | 226.443 | 12 |
| 6 | 11 | -7 6.41929 | 189.955 | 12 |
| 6 | 12 | -7 85.6697 | 164.853 | 12 |
| 6 | 13 | -7 5.86719 | 158.113 | 12 |
| 7 | 0  | -7 707.105 | 331.511 | 10 |
| 7 | -1 | -7-187.519 | 258.524 | 10 |
| 7 | 1  | -7 69.4799 | 210.545 | 10 |
| 7 | -2 | -7 2016.29 | 447.843 | 10 |
| 7 | 2  | -7 1904.17 | 437.832 | 10 |
| 7 | 3  | -7-79.3641 | 245.643 | 12 |
| 7 | -3 | -7-443.438 | 265.255 | 10 |
| 7 | 3  | -7-8.02152 | 233.843 | 10 |
| 7 | 4  | -7 2413.42 | 510.629 | 12 |
| 7 | -4 | -7 2437.07 | 442.739 | 10 |
| 7 | 4  | -7 1461.09 | 387.511 | 10 |
| 7 | 5  | -7 389.334 | 263.150 | 12 |
| 7 | -5 | -7 184.380 | 206.453 | 10 |
| 7 | 5  | -7 399.908 | 211.434 | 10 |
| 7 | 6  | -7 2537.24 | 493.481 | 12 |
| 7 | 7  | -7-50.6964 | 251.078 | 12 |
| 7 | 8  | -7 1157.55 | 340.093 | 12 |
| 7 | 9  | -7 32.1172 | 195.000 | 12 |
| 7 | 10 | -7 915.693 | 299.592 | 12 |
| 7 | 11 | -7 55.4725 | 166.029 | 12 |
| 8 | 1  | -7-88.2486 | 222.504 | 12 |
| 8 | 2  | -7 16.2603 | 197.588 | 12 |
| 8 | 3  | -7-75.2275 | 221.900 | 12 |
| 8 | 4  | -7 123.869 | 226.785 | 12 |
| 8 | 5  | -7-67.7062 | 197.424 | 12 |
| 8 | 6  | -7-167.191 | 231.260 | 12 |
| 8 | 7  | -7 268.379 | 213.904 | 12 |
| 8 | 8  | -7-6.61879 | 158.506 | 12 |
| 8 | 9  | -7 34.1749 | 140.140 | 12 |
| 9 | 0  | -7 576.706 | 252.595 | 12 |
| 9 | 1  | -7 49.9392 | 155.182 | 12 |
| 9 | -1 | -7 190.991 | 208.350 | 12 |
| 9 | 2  | -7 229.517 | 179.880 | 12 |
| 9 | -2 | -7 264.588 | 229.180 | 12 |
| 9 | 3  | -7 214.018 | 184.390 | 12 |
| 9 | -3 | -7-98.9725 | 209.171 | 12 |
| 9 | 4  | -7 7.58638 | 155.879 | 12 |
| 9 | 5  | -7 79.8098 | 159.203 | 12 |
| 9 | 6  | -7 82.0021 | 158.405 | 12 |
| 0 | 0  | 8 24506.6  | 1564.73 | 3  |
| 0 | -1 | 8 518.153  | 368.725 | 3  |
| 0 | 1  | 8 574.745  | 331.543 | 3  |

|    |    |   |          |         |   |
|----|----|---|----------|---------|---|
| 0  | 2  | 8 | 18840.9  | 1417.98 | 7 |
| 0  | -2 | 8 | 20014.8  | 1523.60 | 9 |
| 0  | 2  | 8 | 19854.3  | 1419.36 | 3 |
| 0  | 3  | 8 | -313.159 | 487.430 | 7 |
| 0  | 3  | 8 | 75.5606  | 300.957 | 3 |
| 0  | -3 | 8 | 589.545  | 447.227 | 9 |
| 0  | 4  | 8 | 41570.4  | 1993.26 | 7 |
| 0  | -4 | 8 | 46421.2  | 2328.55 | 9 |
| 0  | 4  | 8 | 45448.8  | 2110.90 | 3 |
| 0  | 5  | 8 | 532.419  | 464.301 | 7 |
| 0  | -5 | 8 | -267.098 | 473.008 | 9 |
| 0  | 5  | 8 | 165.593  | 300.891 | 3 |
| 0  | 6  | 8 | 24313.4  | 1526.39 | 7 |
| 0  | 7  | 8 | 114.318  | 378.133 | 7 |
| 0  | 8  | 8 | 9773.58  | 1037.20 | 7 |
| 0  | 9  | 8 | 336.534  | 317.137 | 7 |
| 0  | 10 | 8 | 7585.26  | 891.999 | 7 |
| 0  | 11 | 8 | -490.625 | 355.007 | 7 |
| 0  | 12 | 8 | 7974.28  | 835.533 | 7 |
| 0  | 13 | 8 | -39.5393 | 272.316 | 7 |
| 0  | 14 | 8 | 2217.92  | 460.372 | 7 |
| 0  | 15 | 8 | -71.7916 | 234.878 | 7 |
| -1 | 0  | 8 | 7581.34  | 1022.27 | 7 |
| -1 | 0  | 8 | 8763.54  | 990.405 | 3 |
| 1  | 0  | 8 | 8781.60  | 917.965 | 3 |
| -1 | -1 | 8 | -26.4040 | 485.521 | 7 |
| -1 | 1  | 8 | -65.0327 | 440.134 | 7 |
| -1 | -1 | 8 | 150.599  | 282.726 | 3 |
| -1 | 1  | 8 | 172.039  | 247.898 | 3 |
| 1  | -1 | 8 | -39.2763 | 272.356 | 3 |
| 1  | 1  | 8 | 94.9833  | 253.815 | 3 |
| 1  | -1 | 8 | 133.309  | 410.442 | 9 |
| -1 | -1 | 8 | 146.389  | 479.154 | 9 |
| -1 | -2 | 8 | 7996.80  | 1038.93 | 7 |
| -1 | 2  | 8 | 8557.24  | 1022.17 | 7 |
| -1 | -2 | 8 | 8437.71  | 966.427 | 3 |
| -1 | 2  | 8 | 8011.24  | 963.280 | 3 |
| 1  | -2 | 8 | 7108.23  | 923.684 | 9 |
| -1 | -2 | 8 | 9397.83  | 1109.83 | 9 |
| 1  | 2  | 8 | 8235.70  | 920.898 | 3 |
| -1 | 3  | 8 | 57.8170  | 327.475 | 7 |
| -1 | 3  | 8 | 429.750  | 354.992 | 3 |
| 1  | -3 | 8 | -139.034 | 340.675 | 9 |
| -1 | -3 | 8 | -727.074 | 488.004 | 9 |
| 1  | 3  | 8 | 274.678  | 276.846 | 3 |
| -1 | 4  | 8 | 4518.62  | 785.126 | 7 |
| 1  | 4  | 8 | 3899.17  | 684.398 | 7 |
| 1  | -4 | 8 | 4991.78  | 816.869 | 9 |
| -1 | -4 | 8 | 5862.82  | 985.028 | 9 |
| -1 | 4  | 8 | 4759.38  | 726.380 | 3 |
| 1  | 5  | 8 | 403.442  | 484.812 | 7 |
| -1 | 5  | 8 | 378.371  | 394.883 | 7 |
| -1 | 5  | 8 | -84.6142 | 436.176 | 3 |
| -1 | -5 | 8 | 443.536  | 405.323 | 9 |
| 1  | 6  | 8 | 4897.00  | 734.082 | 7 |
| -1 | 6  | 8 | 6134.21  | 849.511 | 7 |
| 1  | 7  | 8 | 283.251  | 399.312 | 7 |
| -1 | 7  | 8 | -134.728 | 407.293 | 7 |



|    |    |   |          |         |   |
|----|----|---|----------|---------|---|
| 1  | 8  | 8 | 4144.19  | 678.753 | 7 |
| -1 | 8  | 8 | 4436.94  | 728.711 | 7 |
| 1  | 9  | 8 | 185.878  | 348.266 | 7 |
| -1 | 9  | 8 | -538.592 | 402.562 | 7 |
| 1  | 10 | 8 | 2829.97  | 553.968 | 7 |
| -1 | 10 | 8 | 2653.55  | 614.919 | 7 |
| 1  | 11 | 8 | 103.691  | 297.512 | 7 |
| -1 | 11 | 8 | -358.124 | 369.266 | 7 |
| 1  | 12 | 8 | 2007.86  | 497.766 | 7 |
| -1 | 12 | 8 | 1446.34  | 443.549 | 7 |
| 1  | 13 | 8 | 154.784  | 299.849 | 7 |
| -1 | 13 | 8 | 428.977  | 307.630 | 7 |
| -1 | 14 | 8 | 1092.61  | 377.894 | 7 |
| -1 | 15 | 8 | -56.6383 | 239.184 | 7 |
| -2 | 0  | 8 | 21305.6  | 1682.42 | 7 |
| -2 | 0  | 8 | 19196.1  | 1519.56 | 3 |
| 2  | 0  | 8 | 17999.3  | 1306.70 | 9 |
| -2 | -1 | 8 | 7813.77  | 1118.75 | 7 |
| -2 | 1  | 8 | 5531.43  | 902.180 | 7 |
| -2 | -1 | 8 | 6491.82  | 901.882 | 3 |
| -2 | 1  | 8 | 5562.08  | 843.431 | 3 |
| 2  | -1 | 8 | 4805.74  | 742.667 | 9 |
| 2  | 1  | 8 | 4569.50  | 712.184 | 9 |
| -2 | -1 | 8 | 6495.91  | 967.402 | 9 |
| -2 | -2 | 8 | 18379.3  | 1659.63 | 7 |
| -2 | 2  | 8 | 16835.5  | 1473.50 | 7 |
| -2 | -2 | 8 | 14619.4  | 1311.21 | 3 |
| -2 | 2  | 8 | 14524.5  | 1299.18 | 3 |
| 2  | -2 | 8 | 12206.3  | 1109.32 | 9 |
| -2 | -2 | 8 | 18721.9  | 1633.49 | 9 |
| 2  | 2  | 8 | 13287.2  | 1181.45 | 9 |
| -2 | 3  | 8 | 2197.83  | 655.146 | 7 |
| -2 | 3  | 8 | 2389.81  | 585.971 | 3 |
| 2  | -3 | 8 | 2908.01  | 672.549 | 9 |
| -2 | -3 | 8 | 3488.63  | 831.589 | 9 |
| -2 | 4  | 8 | 16855.3  | 1417.40 | 7 |
| 2  | -4 | 8 | 14231.5  | 1230.36 | 9 |
| -2 | 5  | 8 | 974.531  | 515.216 | 7 |
| -2 | -5 | 8 | 505.925  | 637.335 | 9 |
| -2 | 6  | 8 | 13372.4  | 1243.54 | 7 |
| -2 | 7  | 8 | 969.848  | 506.806 | 7 |
| -2 | 8  | 8 | 8813.02  | 1010.10 | 7 |
| -2 | 9  | 8 | 3500.91  | 664.981 | 7 |
| -2 | 10 | 8 | 5015.52  | 767.441 | 7 |
| -2 | 11 | 8 | 1549.90  | 513.991 | 7 |
| -2 | 12 | 8 | 5142.33  | 730.887 | 7 |
| -2 | 13 | 8 | 227.063  | 301.610 | 7 |
| -2 | 14 | 8 | 1046.32  | 374.468 | 7 |
| -2 | 15 | 8 | 87.4074  | 221.288 | 7 |
| -3 | 0  | 8 | 5774.81  | 1040.45 | 7 |
| -3 | 0  | 8 | 4697.50  | 901.224 | 3 |
| -3 | 0  | 8 | 6062.80  | 1149.81 | 9 |
| -3 | -1 | 8 | 2289.97  | 839.306 | 7 |
| -3 | 1  | 8 | 2395.37  | 761.112 | 7 |
| -3 | -1 | 8 | 2036.62  | 810.599 | 9 |
| -3 | 2  | 8 | 3453.92  | 762.257 | 7 |
| 3  | -2 | 8 | 2520.17  | 648.365 | 9 |
| -3 | 3  | 8 | 869.420  | 472.303 | 7 |

|    |    |    |         |         |    |
|----|----|----|---------|---------|----|
| -3 | -3 | 8  | 538.615 | 731.293 | 9  |
| -3 | 4  | 8  | 7771.94 | 1038.05 | 7  |
| -3 | -4 | 8  | 10382.5 | 1418.00 | 9  |
| -3 | 5  | 8  | 1431.61 | 525.153 | 7  |
| -3 | 6  | 8  | 3828.85 | 760.401 | 7  |
| -3 | 7  | 8  | 1182.03 | 492.035 | 7  |
| -3 | 8  | 8  | 1880.35 | 535.506 | 7  |
| -3 | 9  | 8  | 493.524 | 406.323 | 7  |
| -3 | 10 | 8  | 1512.68 | 470.373 | 7  |
| -3 | 11 | 8  | 544.115 | 344.452 | 7  |
| -3 | 12 | 8  | 352.687 | 347.079 | 7  |
| -3 | 13 | 8  | 302.214 | 318.001 | 7  |
| -3 | 14 | 8  | 750.565 | 337.694 | 7  |
| -4 | 0  | 8  | 17799.5 | 1756.79 | 7  |
| -4 | 1  | 8  | 5296.43 | 1022.26 | 7  |
| -4 | 2  | 8  | 6657.03 | 1061.36 | 7  |
| -4 | 3  | 8  | 6897.77 | 1019.64 | 7  |
| -4 | 4  | 8  | 1201.39 | 583.890 | 7  |
| 4  | 4  | -8 | 1393.18 | 398.148 | 12 |
| 4  | -4 | -8 | 926.166 | 331.725 | 10 |
| -4 | 5  | 8  | 3582.46 | 788.772 | 7  |
| 4  | 5  | -8 | 2625.34 | 486.945 | 12 |
| 4  | 5  | -8 | 1995.34 | 391.841 | 10 |
| 4  | -5 | -8 | 2036.88 | 411.134 | 10 |
| -4 | 6  | 8  | 3856.18 | 761.016 | 7  |
| 4  | 6  | -8 | 3555.04 | 558.499 | 12 |
| -4 | 7  | 8  | 1518.31 | 505.496 | 7  |
| 4  | 7  | -8 | 2033.10 | 428.558 | 12 |
| -4 | 8  | 8  | 3536.48 | 679.438 | 7  |
| -4 | 9  | 8  | 2735.16 | 574.175 | 7  |
| -4 | 10 | 8  | 2777.09 | 594.128 | 7  |
| -4 | 11 | 8  | 1705.20 | 463.076 | 7  |
| -4 | 12 | 8  | 1791.11 | 468.553 | 7  |
| -4 | 13 | 8  | 822.073 | 342.563 | 7  |
| 5  | 0  | -8 | 215.250 | 274.626 | 10 |
| 5  | -1 | -8 | 1001.22 | 333.133 | 10 |
| 5  | 1  | -8 | 871.026 | 309.748 | 10 |
| -5 | 2  | 8  | 858.035 | 566.533 | 7  |
| 5  | -2 | -8 | 485.617 | 282.799 | 10 |
| 5  | 2  | -8 | 617.180 | 313.427 | 10 |
| 5  | -3 | -8 | 576.810 | 306.656 | 10 |
| 5  | 3  | -8 | 1031.46 | 330.342 | 10 |
| -5 | 4  | 8  | 636.950 | 492.011 | 7  |
| 5  | 4  | -8 | 489.974 | 258.168 | 12 |
| 5  | -4 | -8 | 445.536 | 263.884 | 10 |
| 5  | 4  | -8 | 278.438 | 228.519 | 10 |
| -5 | 5  | 8  | 1131.10 | 481.920 | 7  |
| 5  | 5  | -8 | 762.656 | 318.395 | 12 |
| 5  | -5 | -8 | 158.769 | 236.242 | 10 |
| 5  | 5  | -8 | 263.928 | 216.189 | 10 |
| -5 | 6  | 8  | 461.790 | 425.983 | 7  |
| 5  | 6  | -8 | 174.554 | 218.236 | 12 |
| -5 | 7  | 8  | 592.279 | 405.916 | 7  |
| 5  | 7  | -8 | 759.701 | 300.962 | 12 |
| -5 | 8  | 8  | 362.867 | 380.807 | 7  |
| 5  | 8  | -8 | 667.067 | 260.763 | 12 |
| -5 | 9  | 8  | 373.129 | 322.201 | 7  |
| 5  | 9  | -8 | 919.919 | 292.695 | 12 |

|    |    |            |         |    |
|----|----|------------|---------|----|
| -5 | 10 | 8-237.358  | 336.816 | 7  |
| 5  | 10 | -8 331.631 | 202.998 | 12 |
| -5 | 11 | 8 129.922  | 312.241 | 7  |
| 5  | 11 | -8 511.447 | 205.644 | 12 |
| -5 | 12 | 8 292.835  | 327.571 | 7  |
| 6  | 0  | -8 991.124 | 350.007 | 10 |
| 6  | -1 | -8 937.788 | 309.223 | 10 |
| 6  | 1  | -8 1143.56 | 352.542 | 10 |
| 6  | -2 | -8 53.9234 | 229.383 | 10 |
| 6  | 2  | -8-177.391 | 247.588 | 10 |
| 6  | 3  | -8 2529.45 | 503.193 | 12 |
| 6  | -3 | -8 1947.81 | 404.965 | 10 |
| 6  | 3  | -8 1651.93 | 398.765 | 10 |
| 6  | 4  | -8 161.320 | 242.221 | 12 |
| 6  | -4 | -8 109.824 | 208.168 | 10 |
| 6  | 4  | -8 72.5425 | 233.688 | 10 |
| 6  | 5  | -8 3101.87 | 532.892 | 12 |
| 6  | -5 | -8 2110.82 | 424.715 | 10 |
| 6  | 5  | -8 1936.73 | 370.799 | 10 |
| 6  | 6  | -8 314.532 | 260.872 | 12 |
| 6  | 7  | -8 1564.32 | 370.642 | 12 |
| 6  | 8  | -8 528.797 | 262.073 | 12 |
| 6  | 9  | -8 945.493 | 286.729 | 12 |
| 6  | 10 | -8 280.950 | 177.300 | 12 |
| 7  | 0  | -8-12.6352 | 253.990 | 10 |
| 7  | -1 | -8 26.4939 | 184.703 | 10 |
| 7  | 1  | -8 205.385 | 210.158 | 10 |
| 7  | 2  | -8-77.1826 | 212.508 | 12 |
| 7  | -2 | -8-103.350 | 199.452 | 10 |
| 7  | 2  | -8-48.4641 | 218.105 | 10 |
| 7  | 3  | -8 46.1448 | 201.551 | 12 |
| 7  | -3 | -8 403.036 | 229.143 | 10 |
| 7  | 3  | -8 98.6041 | 193.659 | 10 |
| 7  | 4  | -8 105.290 | 200.720 | 12 |
| 7  | -4 | -8-144.534 | 199.988 | 10 |
| 7  | 4  | -8 1.18895 | 209.478 | 10 |
| 7  | 5  | -8 383.626 | 239.566 | 12 |
| 7  | 6  | -8-243.387 | 237.455 | 12 |
| 7  | 7  | -8 263.857 | 205.576 | 12 |
| 7  | 8  | -8 103.207 | 160.858 | 12 |
| 7  | 9  | -8 156.765 | 166.595 | 12 |
| 8  | 0  | -8 168.424 | 209.538 | 12 |
| 8  | 1  | -8 375.311 | 220.553 | 12 |
| 8  | -1 | -8 450.019 | 236.244 | 12 |
| 8  | 2  | -8-75.0631 | 194.541 | 12 |
| 8  | 3  | -8 521.651 | 237.523 | 12 |
| 8  | 4  | -8 19.6202 | 147.763 | 12 |
| 8  | 5  | -8 378.617 | 200.988 | 12 |
| 8  | 6  | -8 105.003 | 173.828 | 12 |
| 0  | 0  | 9-371.457  | 436.396 | 7  |
| 0  | 0  | 9 236.505  | 420.218 | 9  |
| 0  | 1  | 9 15473.4  | 1249.55 | 7  |
| 0  | -1 | 9 16344.4  | 1356.71 | 9  |
| 0  | 1  | 9 14959.2  | 1289.44 | 9  |
| 0  | 2  | 9-376.282  | 423.502 | 7  |
| 0  | -2 | 9-445.135  | 408.192 | 9  |
| 0  | 2  | 9 148.183  | 315.987 | 9  |
| 0  | 3  | 9 11638.6  | 1079.19 | 7  |

|    |    |   |          |         |   |
|----|----|---|----------|---------|---|
| 0  | -3 | 9 | 12472.4  | 1252.65 | 9 |
| 0  | 4  | 9 | 58.2419  | 348.118 | 7 |
| 0  | -4 | 9 | -472.460 | 527.605 | 9 |
| 0  | 5  | 9 | 11182.1  | 1060.78 | 7 |
| 0  | 6  | 9 | 203.619  | 293.483 | 7 |
| 0  | 7  | 9 | 9129.17  | 907.862 | 7 |
| 0  | 8  | 9 | 253.784  | 309.011 | 7 |
| 0  | 9  | 9 | 6498.73  | 762.472 | 7 |
| 0  | 10 | 9 | -33.6435 | 279.796 | 7 |
| 0  | 11 | 9 | 4986.47  | 625.210 | 7 |
| 0  | 12 | 9 | -32.5340 | 249.157 | 7 |
| 0  | 13 | 9 | 1072.05  | 330.868 | 7 |
| -1 | 0  | 9 | 399.362  | 367.811 | 7 |
| 1  | 0  | 9 | 542.955  | 306.634 | 9 |
| -1 | 0  | 9 | 650.123  | 479.426 | 9 |
| -1 | 1  | 9 | 4947.25  | 770.508 | 7 |
| 1  | 1  | 9 | 2869.55  | 584.027 | 7 |
| 1  | -1 | 9 | 4500.78  | 734.595 | 9 |
| -1 | -1 | 9 | 4998.51  | 880.773 | 9 |
| 1  | 1  | 9 | 4527.90  | 739.871 | 9 |
| -1 | 1  | 9 | 4742.70  | 847.271 | 9 |
| 1  | 2  | 9 | 27.2505  | 313.268 | 7 |
| -1 | 2  | 9 | -99.7534 | 358.761 | 7 |
| 1  | -2 | 9 | 271.268  | 347.586 | 9 |
| -1 | -2 | 9 | 18.4571  | 435.720 | 9 |
| 1  | 2  | 9 | -359.213 | 332.663 | 9 |
| 1  | 3  | 9 | 4979.44  | 703.007 | 7 |
| -1 | 3  | 9 | 5471.01  | 820.592 | 7 |
| 1  | -3 | 9 | 5329.92  | 802.542 | 9 |
| -1 | -3 | 9 | 5494.43  | 920.706 | 9 |
| 1  | 3  | 9 | 4996.39  | 767.477 | 9 |
| 1  | 4  | 9 | -406.942 | 361.832 | 7 |
| -1 | 4  | 9 | 66.8191  | 358.822 | 7 |
| -1 | -4 | 9 | 59.8933  | 383.430 | 9 |
| 1  | 5  | 9 | 7638.52  | 832.306 | 7 |
| -1 | 5  | 9 | 7720.65  | 921.863 | 7 |
| 1  | 6  | 9 | 342.474  | 396.524 | 7 |
| -1 | 6  | 9 | -42.7756 | 346.443 | 7 |
| 1  | 7  | 9 | 2041.58  | 517.496 | 7 |
| -1 | 7  | 9 | 2841.53  | 590.129 | 7 |
| 1  | 8  | 9 | 30.9695  | 325.692 | 7 |
| -1 | 8  | 9 | 148.227  | 324.472 | 7 |
| 1  | 9  | 9 | 1719.04  | 484.744 | 7 |
| -1 | 9  | 9 | 1408.94  | 452.320 | 7 |
| -1 | 10 | 9 | 242.025  | 313.239 | 7 |
| -1 | 11 | 9 | 2019.60  | 443.401 | 7 |
| -1 | 12 | 9 | 107.799  | 238.196 | 7 |
| -1 | 13 | 9 | 650.844  | 286.147 | 7 |
| -2 | 0  | 9 | 342.445  | 442.243 | 7 |
| 2  | 0  | 9 | 1377.85  | 415.623 | 9 |
| -2 | 0  | 9 | 1986.45  | 600.975 | 9 |
| -2 | 1  | 9 | 11798.0  | 1232.76 | 7 |
| 2  | -1 | 9 | 9444.74  | 963.184 | 9 |
| 2  | 1  | 9 | 8421.23  | 927.084 | 9 |
| -2 | -1 | 9 | 11598.6  | 1253.05 | 9 |
| -2 | 1  | 9 | 11453.2  | 1236.97 | 9 |
| -2 | 2  | 9 | 820.780  | 425.647 | 7 |
| 2  | -2 | 9 | 917.259  | 417.533 | 9 |

|    |    |    |         |         |    |
|----|----|----|---------|---------|----|
| -2 | -2 | 9  | 1580.98 | 558.719 | 9  |
| 2  | 2  | 9  | 898.385 | 424.280 | 9  |
| -2 | 3  | 9  | 10675.2 | 1128.64 | 7  |
| 2  | -3 | 9  | 9594.74 | 1013.77 | 9  |
| -2 | -3 | 9  | 11853.3 | 1300.97 | 9  |
| 2  | 3  | 9  | 8797.30 | 922.525 | 9  |
| -2 | 4  | 9  | 1767.75 | 528.099 | 7  |
| -2 | -4 | 9  | 1847.70 | 652.687 | 9  |
| 2  | 4  | 9  | 1615.17 | 493.841 | 9  |
| -2 | 5  | 9  | 9586.26 | 1052.24 | 7  |
| 2  | 5  | 9  | 7915.48 | 863.711 | 9  |
| -2 | 6  | 9  | 1277.81 | 509.711 | 7  |
| -2 | 7  | 9  | 5912.78 | 804.699 | 7  |
| -2 | 8  | 9  | 183.082 | 343.406 | 7  |
| -2 | 9  | 9  | 5278.24 | 719.692 | 7  |
| -2 | 10 | 9  | 398.152 | 319.938 | 7  |
| -2 | 11 | 9  | 2636.13 | 505.152 | 7  |
| -2 | 12 | 9  | 783.409 | 337.815 | 7  |
| -2 | 13 | 9  | 1094.73 | 330.905 | 7  |
| -3 | 0  | 9  | 579.890 | 449.290 | 7  |
| -3 | 0  | 9  | 527.412 | 454.785 | 9  |
| -3 | 1  | 9  | 4560.93 | 819.052 | 7  |
| -3 | -1 | 9  | 5897.31 | 968.784 | 9  |
| -3 | 1  | 9  | 4918.91 | 859.603 | 9  |
| -3 | 2  | 9  | 1860.63 | 560.903 | 7  |
| -3 | -2 | 9  | 1771.69 | 631.493 | 9  |
| -3 | 3  | 9  | 1379.08 | 505.968 | 7  |
| -3 | -3 | 9  | 2446.99 | 696.078 | 9  |
| -3 | 4  | 9  | 318.642 | 368.132 | 7  |
| -3 | -4 | 9  | 1260.83 | 606.674 | 9  |
| -3 | 5  | 9  | 2028.04 | 579.659 | 7  |
| -3 | 6  | 9  | 257.226 | 330.220 | 7  |
| -3 | 7  | 9  | 1424.75 | 472.861 | 7  |
| -3 | 8  | 9  | 386.044 | 313.165 | 7  |
| -3 | 9  | 9  | 522.675 | 397.666 | 7  |
| -3 | 10 | 9  | 465.686 | 323.730 | 7  |
| -3 | 11 | 9  | 162.301 | 288.929 | 7  |
| -3 | 12 | 9  | 216.342 | 254.816 | 7  |
| -4 | 1  | 9  | 2827.12 | 694.475 | 7  |
| 4  | -1 | -9 | 932.700 | 316.313 | 10 |
| -4 | 1  | 9  | 3221.85 | 732.749 | 9  |
| -4 | 2  | 9  | 3580.97 | 725.761 | 7  |
| 4  | -2 | -9 | 1299.43 | 327.763 | 10 |
| 4  | 2  | -9 | 1564.74 | 361.814 | 10 |
| -4 | 2  | 9  | 4192.40 | 808.535 | 9  |
| -4 | 3  | 9  | 3128.24 | 699.073 | 7  |
| 4  | -3 | -9 | 599.277 | 304.109 | 10 |
| 4  | 3  | -9 | 1415.96 | 338.161 | 10 |
| -4 | 3  | 9  | 4265.58 | 761.241 | 9  |
| 4  | -4 | -9 | 937.940 | 315.745 | 10 |
| 4  | 4  | -9 | 733.196 | 291.694 | 10 |
| 4  | -5 | -9 | 563.277 | 262.320 | 10 |
| 4  | 5  | -9 | 1112.16 | 293.646 | 10 |
| -4 | 6  | 9  | 2125.48 | 541.272 | 7  |
| -4 | 7  | 9  | 1780.24 | 448.546 | 7  |
| -4 | 8  | 9  | 1304.67 | 417.137 | 7  |
| -4 | 9  | 9  | 1570.24 | 444.636 | 7  |
| -4 | 10 | 9  | 649.513 | 343.865 | 7  |

|    |    |    |          |         |    |
|----|----|----|----------|---------|----|
| -4 | 11 | 9  | 418.940  | 307.529 | 7  |
| 5  | 0  | -9 | 293.326  | 233.769 | 10 |
| 5  | -1 | -9 | 331.386  | 259.431 | 10 |
| 5  | 1  | -9 | 497.370  | 258.025 | 10 |
| 5  | 2  | -9 | 906.067  | 282.380 | 12 |
| 5  | -2 | -9 | 462.007  | 264.151 | 10 |
| 5  | 2  | -9 | 273.543  | 191.229 | 10 |
| -5 | 3  | 9  | 8.77797  | 389.635 | 7  |
| 5  | 3  | -9 | 73.7148  | 187.717 | 12 |
| 5  | -3 | -9 | 1.30255  | 229.205 | 10 |
| 5  | 3  | -9 | 45.5426  | 176.950 | 10 |
| -5 | 4  | 9  | 1153.19  | 462.836 | 7  |
| 5  | 4  | -9 | 1034.69  | 306.967 | 12 |
| 5  | -4 | -9 | 437.889  | 246.085 | 10 |
| 5  | 4  | -9 | 616.686  | 255.519 | 10 |
| -5 | 5  | 9  | 540.611  | 364.619 | 7  |
| 5  | 5  | -9 | 530.147  | 233.987 | 12 |
| 5  | -5 | -9 | 24.6245  | 207.926 | 10 |
| 5  | 5  | -9 | 26.1179  | 174.829 | 10 |
| -5 | 6  | 9  | 524.228  | 372.462 | 7  |
| 5  | 6  | -9 | 784.046  | 258.474 | 12 |
| -5 | 7  | 9  | 152.409  | 283.128 | 7  |
| 5  | 7  | -9 | 363.404  | 213.098 | 12 |
| -5 | 8  | 9  | 178.222  | 280.638 | 7  |
| -5 | 9  | 9  | -185.475 | 291.583 | 7  |
| 6  | 0  | -9 | 699.276  | 273.419 | 10 |
| 6  | 1  | -9 | 142.681  | 180.843 | 12 |
| 6  | -1 | -9 | 146.423  | 205.867 | 10 |
| 6  | 1  | -9 | 252.033  | 183.668 | 10 |
| 6  | 2  | -9 | 1484.96  | 347.206 | 12 |
| 6  | -2 | -9 | 916.210  | 275.651 | 10 |
| 6  | 2  | -9 | 1004.49  | 291.259 | 10 |
| 6  | 3  | -9 | 211.518  | 188.319 | 12 |
| 6  | -3 | -9 | -231.586 | 210.264 | 10 |
| 6  | 3  | -9 | -52.8938 | 175.221 | 10 |
| 6  | 4  | -9 | 946.977  | 266.589 | 12 |
| 6  | -4 | -9 | 646.611  | 235.948 | 10 |
| 6  | 4  | -9 | 636.826  | 207.269 | 10 |
| 6  | 5  | -9 | 169.761  | 187.334 | 12 |
| 6  | -5 | -9 | 50.4404  | 170.812 | 10 |
| 6  | 5  | -9 | 106.970  | 172.186 | 10 |
| 6  | 6  | -9 | 1031.69  | 262.829 | 12 |
| 6  | 7  | -9 | 184.409  | 220.494 | 12 |
| 7  | 0  | -9 | -85.7857 | 176.619 | 12 |
| 7  | 0  | -9 | 25.7112  | 167.817 | 10 |
| 7  | 1  | -9 | 130.543  | 140.506 | 12 |
| 7  | -1 | -9 | 9.45578  | 142.787 | 12 |
| 7  | -1 | -9 | -77.6185 | 160.185 | 10 |
| 7  | 1  | -9 | 96.9915  | 165.383 | 10 |
| 7  | 2  | -9 | 285.161  | 189.903 | 12 |
| 7  | -2 | -9 | 293.337  | 182.308 | 10 |
| 7  | 2  | -9 | 176.930  | 191.501 | 10 |
| 7  | 3  | -9 | -0.98583 | 142.758 | 12 |
| 7  | 4  | -9 | 284.282  | 160.349 | 12 |
| 7  | 5  | -9 | 31.8834  | 157.678 | 12 |
| 0  | 0  | 10 | 119.412  | 326.212 | 9  |
| 0  | -1 | 10 | -162.517 | 362.040 | 9  |
| 0  | 1  | 10 | 50.0856  | 327.141 | 9  |

|    |    |    |          |         |   |
|----|----|----|----------|---------|---|
| 0  | -2 | 10 | 176.075  | 316.449 | 9 |
| 0  | 2  | 10 | 509.979  | 356.143 | 9 |
| 0  | 3  | 10 | 19.4175  | 295.901 | 7 |
| 0  | -3 | 10 | -149.483 | 387.453 | 9 |
| 0  | 3  | 10 | -335.488 | 352.442 | 9 |
| 0  | 4  | 10 | 39.4264  | 306.686 | 7 |
| 0  | 4  | 10 | -56.8635 | 362.907 | 9 |
| 0  | 5  | 10 | 124.192  | 270.116 | 7 |
| 0  | 5  | 10 | 125.394  | 301.605 | 9 |
| 0  | 6  | 10 | -45.9341 | 239.570 | 7 |
| 0  | 6  | 10 | 108.024  | 307.841 | 9 |
| 0  | 7  | 10 | -247.949 | 261.039 | 7 |
| 0  | 8  | 10 | 73.2154  | 275.586 | 7 |
| 0  | 9  | 10 | -89.4650 | 274.518 | 7 |
| 0  | 10 | 10 | -68.5967 | 238.791 | 7 |
| 1  | 0  | 10 | 10194.8  | 977.678 | 9 |
| -1 | 0  | 10 | 12169.8  | 1132.32 | 9 |
| 1  | -1 | 10 | 39.8100  | 300.017 | 9 |
| -1 | -1 | 10 | 145.451  | 378.579 | 9 |
| 1  | 1  | 10 | 264.349  | 319.249 | 9 |
| -1 | 1  | 10 | 440.494  | 373.607 | 9 |
| -1 | 2  | 10 | 8534.61  | 913.354 | 7 |
| 1  | -2 | 10 | 9635.91  | 947.592 | 9 |
| -1 | -2 | 10 | 10670.7  | 1054.01 | 9 |
| 1  | 2  | 10 | 9798.29  | 926.157 | 9 |
| -1 | 2  | 10 | 10983.4  | 1067.64 | 9 |
| -1 | 3  | 10 | 208.847  | 292.750 | 7 |
| -1 | -3 | 10 | 441.171  | 395.920 | 9 |
| 1  | 3  | 10 | 376.961  | 323.847 | 9 |
| -1 | 3  | 10 | 118.077  | 313.479 | 9 |
| -1 | 4  | 10 | 8358.32  | 862.567 | 7 |
| 1  | 4  | 10 | 9195.35  | 909.032 | 9 |
| -1 | 4  | 10 | 9164.89  | 955.184 | 9 |
| -1 | 5  | 10 | 374.930  | 302.407 | 7 |
| 1  | 5  | 10 | 51.3507  | 280.050 | 9 |
| -1 | 6  | 10 | 6244.18  | 734.369 | 7 |
| 1  | 6  | 10 | 6567.33  | 724.613 | 9 |
| -1 | 7  | 10 | 164.372  | 257.028 | 7 |
| 1  | 7  | 10 | 44.3586  | 283.166 | 9 |
| -1 | 8  | 10 | 4288.98  | 585.731 | 7 |
| 1  | 8  | 10 | 4360.46  | 543.506 | 9 |
| -1 | 9  | 10 | 528.006  | 307.554 | 7 |
| 1  | 9  | 10 | -208.946 | 259.161 | 9 |
| -1 | 10 | 10 | 3026.51  | 447.132 | 7 |
| 2  | 0  | 10 | -15.4875 | 265.982 | 9 |
| -2 | 0  | 10 | -74.8901 | 392.818 | 9 |
| 2  | -1 | 10 | -116.061 | 261.072 | 9 |
| 2  | 1  | 10 | 71.2231  | 273.011 | 9 |
| -2 | -1 | 10 | 112.682  | 324.207 | 9 |
| -2 | 1  | 10 | -66.9534 | 375.255 | 9 |
| -2 | 2  | 10 | -77.7714 | 331.374 | 7 |
| -2 | -2 | 10 | 52.5956  | 390.509 | 9 |
| 2  | 2  | 10 | -150.780 | 292.556 | 9 |
| -2 | 2  | 10 | 197.905  | 349.854 | 9 |
| -2 | 3  | 10 | 104.076  | 329.974 | 7 |
| -2 | -3 | 10 | -33.1491 | 409.762 | 9 |
| 2  | 3  | 10 | -197.818 | 301.757 | 9 |
| -2 | 3  | 10 | 264.720  | 307.474 | 9 |

|    |    |             |         |    |
|----|----|-------------|---------|----|
| -2 | 4  | 10-7.39544  | 271.211 | 7  |
| 2  | 4  | 10-237.287  | 324.376 | 9  |
| -2 | 4  | 10 200.554  | 291.953 | 9  |
| -2 | 5  | 10-47.6978  | 283.294 | 7  |
| -2 | 6  | 10 221.081  | 269.681 | 7  |
| -2 | 7  | 10 29.8305  | 274.908 | 7  |
| -2 | 8  | 10-55.1462  | 263.435 | 7  |
| -2 | 9  | 10 319.842  | 249.577 | 7  |
| -2 | 10 | 10 137.531  | 223.079 | 7  |
| -3 | 0  | 10 4976.04  | 760.149 | 9  |
| -3 | -1 | 10 1995.61  | 554.886 | 9  |
| -3 | 1  | 10 1902.36  | 560.796 | 9  |
| -3 | -2 | 10 5441.74  | 829.492 | 9  |
| -3 | 2  | 10 5473.24  | 749.186 | 9  |
| -3 | 3  | 10 2308.53  | 543.145 | 7  |
| -3 | 3  | 10 2645.70  | 572.796 | 9  |
| -3 | 4  | 10 3774.10  | 616.888 | 7  |
| 3  | -4 | -10 662.853 | 251.735 | 10 |
| 3  | 4  | -10 524.343 | 234.890 | 10 |
| -3 | 4  | 10 4474.35  | 658.469 | 9  |
| -3 | 5  | 10 2030.43  | 468.148 | 7  |
| 3  | -5 | -10 400.415 | 195.180 | 10 |
| 3  | 5  | -10 186.332 | 177.870 | 10 |
| -3 | 5  | 10 2006.74  | 522.171 | 9  |
| -3 | 6  | 10 3270.31  | 552.590 | 7  |
| -3 | 7  | 10 561.756  | 310.957 | 7  |
| -3 | 8  | 10 1552.14  | 388.618 | 7  |
| -3 | 9  | 10 459.185  | 269.806 | 7  |
| -3 | 10 | 10 834.400  | 310.328 | 7  |
| 4  | 0  | -10 169.389 | 172.827 | 10 |
| 4  | -1 | -10 114.020 | 195.487 | 10 |
| 4  | 1  | -10-15.2239 | 172.451 | 10 |
| -4 | 1  | 10 283.985  | 337.120 | 9  |
| 4  | -2 | -10 122.775 | 168.555 | 10 |
| 4  | 2  | -10 80.9156 | 163.538 | 10 |
| -4 | 2  | 10 120.889  | 365.474 | 9  |
| 4  | -3 | -10 43.6749 | 169.918 | 10 |
| 4  | 3  | -10 20.8863 | 151.271 | 10 |
| -4 | 3  | 10 16.2848  | 308.637 | 9  |
| -4 | 4  | 10-80.3654  | 305.511 | 7  |
| 4  | -4 | -10 83.9675 | 167.718 | 10 |
| 4  | 4  | -10-148.072 | 158.647 | 10 |
| -4 | 4  | 10 252.087  | 291.000 | 9  |
| -4 | 5  | 10-7.48451  | 272.666 | 7  |
| 4  | -5 | -10-24.8852 | 147.202 | 10 |
| 4  | 5  | -10 26.3490 | 152.173 | 10 |
| -4 | 5  | 10-81.8300  | 283.055 | 9  |
| -4 | 6  | 10-108.993  | 260.091 | 7  |
| -4 | 6  | 10 319.626  | 312.500 | 9  |
| -4 | 7  | 10 65.1228  | 231.287 | 7  |
| -4 | 7  | 10 69.8417  | 275.444 | 9  |
| -4 | 8  | 10 433.031  | 250.551 | 7  |
| -4 | 8  | 10-261.261  | 236.153 | 9  |
| 5  | 0  | -10 752.034 | 223.525 | 12 |
| 5  | 0  | -10 347.838 | 198.466 | 10 |
| 5  | -1 | -10 1257.01 | 262.385 | 12 |
| 5  | -1 | -10 791.597 | 253.125 | 10 |
| 5  | 1  | -10 430.054 | 227.016 | 10 |



|    |    |     |          |         |    |
|----|----|-----|----------|---------|----|
| 5  | -2 | -10 | 56.9416  | 157.235 | 10 |
| 5  | 2  | -10 | 188.246  | 180.732 | 10 |
| 5  | -3 | -10 | 497.907  | 217.419 | 10 |
| 5  | 3  | -10 | 323.473  | 178.426 | 10 |
| 5  | -4 | -10 | -56.3504 | 153.728 | 10 |
| 5  | 4  | -10 | 58.4316  | 131.691 | 10 |
| 6  | 0  | -10 | -48.6839 | 125.686 | 12 |
| 6  | 0  | -10 | -137.779 | 160.084 | 10 |
| 6  | 1  | -10 | 131.030  | 148.893 | 12 |
| 6  | -1 | -10 | -42.4557 | 117.968 | 12 |
| 6  | -1 | -10 | 143.971  | 135.418 | 10 |
| 6  | 1  | -10 | 120.674  | 128.436 | 10 |
| 6  | -2 | -10 | 92.8210  | 135.982 | 12 |
| 6  | -2 | -10 | 60.9774  | 139.785 | 10 |
| 6  | 2  | -10 | 184.211  | 157.462 | 10 |
| 6  | -3 | -10 | -29.8449 | 176.264 | 12 |
| 6  | -3 | -10 | -43.7471 | 139.947 | 10 |
| 6  | 3  | -10 | -59.7136 | 152.132 | 10 |
| 0  | 0  | 11  | 36.2943  | 256.037 | 9  |
| 0  | 1  | 11  | 3404.40  | 531.473 | 9  |
| 0  | 2  | 11  | 106.653  | 238.888 | 9  |
| 0  | 3  | 11  | 2729.60  | 486.766 | 9  |
| 0  | 5  | 11  | 1946.69  | 389.986 | 9  |
| 0  | 6  | 11  | -36.8373 | 204.250 | 9  |
| 0  | 7  | 11  | 908.376  | 273.250 | 9  |
| -1 | 0  | 11  | 146.362  | 271.197 | 9  |
| -1 | -1 | 11  | 553.252  | 332.947 | 9  |
| 1  | 1  | 11  | 631.778  | 298.937 | 9  |
| -1 | 1  | 11  | 744.566  | 326.903 | 9  |
| 1  | 2  | 11  | 215.732  | 242.642 | 9  |
| -1 | 2  | 11  | 241.437  | 285.356 | 9  |
| 1  | 3  | 11  | 908.266  | 308.613 | 9  |
| -1 | 3  | 11  | 565.677  | 275.983 | 9  |
| 1  | 4  | 11  | -46.6641 | 233.836 | 9  |
| -1 | 4  | 11  | -217.484 | 271.878 | 9  |
| 1  | 5  | 11  | -212.944 | 228.353 | 9  |
| -1 | 5  | 11  | 238.219  | 236.859 | 9  |
| 1  | 6  | 11  | -98.4724 | 266.232 | 9  |
| -1 | 6  | 11  | 158.398  | 243.182 | 9  |
| -1 | 7  | 11  | 234.524  | 235.913 | 9  |
| -2 | 0  | 11  | 463.608  | 317.433 | 9  |
| -2 | 1  | 11  | 2442.22  | 458.633 | 9  |
| -2 | 2  | 11  | 504.416  | 285.734 | 9  |
| 2  | -3 | -11 | 182.276  | 155.986 | 10 |
| 2  | 3  | 11  | 1914.35  | 395.137 | 9  |
| -2 | 3  | 11  | 2418.93  | 449.253 | 9  |
| 2  | -4 | -11 | -172.896 | 138.406 | 10 |
| 2  | 4  | -11 | 76.6939  | 127.715 | 10 |
| -2 | 5  | 11  | 1444.32  | 369.084 | 9  |
| -2 | 6  | 11  | -98.1307 | 236.676 | 9  |
| -2 | 7  | 11  | 927.188  | 317.482 | 9  |
| 3  | 0  | -11 | 96.8186  | 126.370 | 10 |
| 3  | -1 | -11 | -40.0264 | 125.630 | 10 |
| 3  | 1  | -11 | 80.7868  | 140.287 | 10 |
| -3 | 1  | 11  | 123.480  | 261.319 | 9  |
| 3  | -2 | -11 | 56.3360  | 130.693 | 10 |
| 3  | 2  | -11 | 8.80935  | 126.577 | 10 |
| -3 | 2  | 11  | 236.828  | 272.003 | 9  |

```

3 -3 -11 209.801 156.746 10
3 3 -11 61.8035 135.912 10
3 -4 -11-40.9963 142.333 10
3 4 -11-90.6181 121.424 10
-3 4 11 107.073 248.735 9
-3 5 11 281.169 231.300 9
4 0 -11 233.493 147.512 10
4 -1 -11 50.8944 117.308 10
4 1 -11 249.542 133.753 10
4 -2 -11-40.3392 115.313 10
4 2 -11 138.769 128.553 10
0 0 0 0.00 0.00 0
TITL adish1 in Pnma
REM Pnma (#62, found as Pbnm in bca setting)
CELL 1.54184 9.926225 17.229234 9.725554 90.0000 90.0000
90.0000
ZERR 5.00 0.001259 0.000907 0.000843 0.0000 0.0000
0.0000
LATT 1
SYMM -x+1/2,-y, z+1/2
SYMM -x, y+1/2,-z
SYMM x+1/2,-y+1/2,-z+1/2
SFAC C H N S Sn
UNIT 70.00 90.00 10.00 10.00 5.00
TREF
HKLF 4
END
;
_shelx_hkl_checksum 57209

```

CIF of [Me<sub>2</sub>SnCl{SC<sub>4</sub>H(Me-4,6)<sub>2</sub>N<sub>2</sub>}] (4)

data\_shelx

```

_audit_creation_method SHELXL-2014/6
_chemical_name_systematic ?
_chemical_name_common ?
_chemical_melting_point ?
_chemical_formula_moiety ?
_chemical_formula_sum
'C8 H13 Cl1 N2 S1 Sn1'
_chemical_formula_weight 323.42

```

loop\_

```

_atom_type_symbol
_atom_type_description
_atom_type_scatter_dispersion_real
_atom_type_scatter_dispersion_imag
_atom_type_scatter_source
'C' 'C' 0.0033 0.0016
'International Tables Vol C Tables 4.2.6.8 and 6.1.1.4'
'H' 'H' 0.0000 0.0000
'International Tables Vol C Tables 4.2.6.8 and 6.1.1.4'
'N' 'N' 0.0061 0.0033
'International Tables Vol C Tables 4.2.6.8 and 6.1.1.4'
'S' 'S' 0.1246 0.1234
'International Tables Vol C Tables 4.2.6.8 and 6.1.1.4'

```

```
'Cl' 'Cl' 0.1484 0.1585
'International Tables Vol C Tables 4.2.6.8 and 6.1.1.4'
'Sn' 'Sn' -0.6537 1.4246
'International Tables Vol C Tables 4.2.6.8 and 6.1.1.4'
```

```
_space_group_crystal_system orthorhombic
_space_group_IT_number 64
_space_group_name_H-M_alt 'C m c a'
_space_group_name_Hall '-C 2bc 2'
```

```
_shelx_space_group_comment
```

```
;
```

The symmetry employed for this shelxl refinement is uniquely defined by the following loop, which should always be used as a source of symmetry information in preference to the above space-group names. They are only intended as comments.

```
;
```

```
loop_
```

```
_space_group_symop_operation_xyz
```

```
'x, y, z'
'-x, -y+1/2, z+1/2'
'x, -y, -z'
'-x+1/2, y, -z+1/2'
'x+1/2, y+1/2, z'
'-x+1/2, -y+1, z+1/2'
'x+1/2, -y+1/2, -z'
'-x+1, y+1/2, -z+1/2'
'-x, -y, -z'
'x, y-1/2, -z-1/2'
'-x, y, z'
'x-1/2, -y, z-1/2'
'-x+1/2, -y+1/2, -z'
'x+1/2, y, -z-1/2'
'-x+1/2, y+1/2, z'
'x, -y+1/2, z-1/2'
```

```
_cell_length_a 8.0000(10)
_cell_length_b 20.119(4)
_cell_length_c 16.731(2)
_cell_angle_alpha 90
_cell_angle_beta 90
_cell_angle_gamma 90
_cell_volume 2692.9(7)
_cell_formula_units_Z 8
_cell_measurement_temperature 298(2)
_cell_measurement_reflns_used 25
_cell_measurement_theta_min 10.0
_cell_measurement_theta_max 13.5
```

```
_exptl_crystal_description 'Strip'
_exptl_crystal_colour 'Colourless'
_exptl_crystal_density_meas ?
_exptl_crystal_density_method ?
_exptl_crystal_density_diffrn 1.595
_exptl_crystal_F_000 1264
_exptl_transmission_factor_min ?
_exptl_transmission_factor_max ?
```

```

_exptl_crystal_size_max          0.200
_exptl_crystal_size_mid          0.100
_exptl_crystal_size_min          0.010
_exptl_absorpt_coefficient_mu    2.216
_shelx_estimated_absorpt_T_min   0.666
_shelx_estimated_absorpt_T_max   0.978
_exptl_absorpt_correction_type    psi-scan
_exptl_absorpt_correction_T_min  0.555
_exptl_absorpt_correction_T_max  0.756
_exptl_absorpt_process_details    '(North, Phillips & Mathews, 1968)'
_exptl_absorpt_special_details    ?
_diffrn_ambient_temperature       298(2)
_diffrn_radiation_wavelength      0.71069
_diffrn_radiation_type            MoK\alpha
_diffrn_source                     ?
_diffrn_measurement_device_type    'Rigaku AFC7S'
_diffrn_measurement_method         \w-2\lambda
_diffrn_detector_area_resol_mean   ?
_diffrn_reflns_number             2259
_diffrn_reflns_av_unetI/netI      0.1056
_diffrn_reflns_av_R_equivalents    0.0382
_diffrn_reflns_limit_h_min        -9
_diffrn_reflns_limit_h_max        5
_diffrn_reflns_limit_k_min        -26
_diffrn_reflns_limit_k_max        0
_diffrn_reflns_limit_l_min        -12
_diffrn_reflns_limit_l_max        21
_diffrn_reflns_theta_min          2.998
_diffrn_reflns_theta_max          27.462
_diffrn_reflns_theta_full         25.240
_diffrn_measured_fraction_theta_max 0.950
_diffrn_measured_fraction_theta_full 0.998
_diffrn_reflns_Laue_measured_fraction_max 0.950
_diffrn_reflns_Laue_measured_fraction_full 0.998
_diffrn_reflns_point_group_measured_fraction_max 0.950
_diffrn_reflns_point_group_measured_fraction_full 0.998
_reflns_number_total              1571
_reflns_number_gt                 814
_reflns_threshold_expression       'I > 2\sigma(I)'
_reflns_Friedel_coverage           0.000
_reflns_Friedel_fraction_max      .
_reflns_Friedel_fraction_full     .

_reflns_special_details
;
Reflections were merged by SHELXL according to the crystal
class for the calculation of statistics and refinement.

_reflns_Friedel_fraction is defined as the number of unique
Friedel pairs measured divided by the number that would be
possible theoretically, ignoring centric projections and
systematic absences.
;

_computing_data_collection         'WinAFC'
_computing_cell_refinement         'WinAFC'
_computing_data_reduction          'CrystalStructure'
_computing_structure_solution      'SIR-2011'

```

```

_computing_structure_refinement 'SHELXL-2014/6 (Sheldrick, 2014)'
_computing_molecular_graphics 'Ortep-3 for windows'
_computing_publication_material 'WinGX 1.70.01'
_refine_special_details ?
_refine_ls_structure_factor_coef Fsqd
_refine_ls_matrix_type full
_refine_ls_weighting_scheme calc
_refine_ls_weighting_details
'w=1/[\s^2^(Fo^2^)+(0.0451P)^2^] where P=(Fo^2^+2Fc^2^)/3'
_atom_sites_solution_primary ?
_atom_sites_solution_secondary ?
_atom_sites_solution_hydrogens geom
_refine_ls_hydrogen_treatment constr
_refine_ls_extinction_method none
_refine_ls_extinction_coef .
_refine_ls_number_reflns 1571
_refine_ls_number_parameters 79
_refine_ls_number_restraints 0
_refine_ls_R_factor_all 0.1411
_refine_ls_R_factor_gt 0.0546
_refine_ls_wR_factor_ref 0.1280
_refine_ls_wR_factor_gt 0.1033
_refine_ls_goodness_of_fit_ref 0.976
_refine_ls_restrained_S_all 0.976
_refine_ls_shift/su_max 0.000
_refine_ls_shift/su_mean 0.000

```

loop\_

```

_atom_site_label
_atom_site_type_symbol
_atom_site_fract_x
_atom_site_fract_y
_atom_site_fract_z
_atom_site_U_iso_or_equiv
_atom_site_adp_type
_atom_site_occupancy
_atom_site_site_symmetry_order
_atom_site_calc_flag
_atom_site_refinement_flags_posn
_atom_site_refinement_flags_adp
_atom_site_refinement_flags_occupancy
_atom_site_disorder_assembly
_atom_site_disorder_group
Sn1 Sn 0.0000 0.37888(4) 0.02745(4) 0.0517(3) Uani 1 2 d S T P . . .
S1 S 0.0000 0.26845(15) -0.03325(15) 0.0634(9) Uani 1 2 d S T P . . .
C11 C1 0.0000 0.43278(16) -0.10293(17) 0.0771(10) Uani 1 2 d S T P . . .
N1 N 0.0000 0.2820(4) 0.1214(5) 0.053(2) Uani 1 2 d S T P . . .
N2 N 0.0000 0.1702(5) 0.0755(6) 0.061(3) Uani 1 2 d S T P . . .
C1 C 0.0000 0.2356(6) 0.0640(6) 0.056(3) Uani 1 2 d S T P . . .
C7 C 0.2454(10) 0.4105(4) 0.0728(5) 0.069(2) Uani 1 1 d . . . . .
H7A H 0.2475 0.4061 0.1299 0.104 Uiso 1 1 calc R U . . .
H7B H 0.2647 0.4560 0.0584 0.104 Uiso 1 1 calc R U . . .
H7C H 0.3311 0.3831 0.0498 0.104 Uiso 1 1 calc R U . . .
C2 C 0.0000 0.1480(6) 0.1513(8) 0.066(3) Uani 1 2 d S T P . . .
C4 C 0.0000 0.2617(6) 0.1980(7) 0.059(3) Uani 1 2 d S T P . . .
C3 C 0.0000 0.1945(7) 0.2128(7) 0.072(4) Uani 1 2 d S T P . . .
H3 H 0.0000 0.1797 0.2655 0.086 Uiso 1 2 calc R U P . . .
C5 C 0.0000 0.0749(5) 0.1631(7) 0.094(5) Uani 1 2 d S T P . . .

```

H5A H -0.0716 0.0545 0.1242 0.141 Uiso 0.5 1 calc R U P . .  
H5B H -0.0401 0.0647 0.2158 0.141 Uiso 0.5 1 calc R U P . .  
H5C H 0.1117 0.0581 0.1571 0.141 Uiso 0.5 1 calc R U P . .  
C6 C 0.0000 0.3139(6) 0.2614(6) 0.095(5) Uani 1 2 d S T P . .  
H6A H 0.1126 0.3219 0.2788 0.143 Uiso 0.5 1 calc R U P . .  
H6B H -0.0661 0.2991 0.3059 0.143 Uiso 0.5 1 calc R U P . .  
H6C H -0.0464 0.3542 0.2403 0.143 Uiso 0.5 1 calc R U P . .

loop\_

\_atom\_site\_aniso\_label  
\_atom\_site\_aniso\_U\_11  
\_atom\_site\_aniso\_U\_22  
\_atom\_site\_aniso\_U\_33  
\_atom\_site\_aniso\_U\_23  
\_atom\_site\_aniso\_U\_13  
\_atom\_site\_aniso\_U\_12  
Sn1 0.0601(6) 0.0486(5) 0.0465(5) -0.0022(4) 0.000 0.000  
S1 0.098(3) 0.0546(18) 0.0375(15) -0.0046(15) 0.000 0.000  
Cl1 0.101(3) 0.077(2) 0.0533(18) 0.0134(17) 0.000 0.000  
N1 0.070(7) 0.042(5) 0.045(5) -0.004(4) 0.000 0.000  
N2 0.076(7) 0.049(6) 0.057(6) -0.001(5) 0.000 0.000  
C1 0.072(8) 0.050(8) 0.044(6) -0.002(6) 0.000 0.000  
C7 0.065(6) 0.066(5) 0.077(6) -0.004(5) -0.006(5) -0.005(5)  
C2 0.069(9) 0.060(8) 0.068(9) 0.006(7) 0.000 0.000  
C4 0.067(8) 0.066(9) 0.044(7) -0.005(6) 0.000 0.000  
C3 0.099(11) 0.069(9) 0.047(7) 0.013(7) 0.000 0.000  
C5 0.147(15) 0.039(7) 0.096(10) 0.017(7) 0.000 0.000  
C6 0.151(14) 0.092(10) 0.043(7) -0.023(8) 0.000 0.000

\_geom\_special\_details

;

All esds (except the esd in the dihedral angle between two l.s. planes) are estimated using the full covariance matrix. The cell esds are taken into account individually in the estimation of esds in distances, angles and torsion angles; correlations between esds in cell parameters are only used when they are defined by crystal symmetry. An approximate (isotropic) treatment of cell esds is used for estimating esds involving l.s. planes.

;

loop\_

\_geom\_bond\_atom\_site\_label\_1  
\_geom\_bond\_atom\_site\_label\_2  
\_geom\_bond\_distance  
\_geom\_bond\_site\_symmetry\_2  
\_geom\_bond\_publ\_flag  
Sn1 C7 2.199(8) . ?  
Sn1 C7 2.199(8) 11 ?  
Sn1 Cl1 2.436(3) . ?  
Sn1 S1 2.443(3) . ?  
Sn1 N1 2.505(8) . ?  
S1 C1 1.756(11) . ?  
N1 C1 1.340(12) . ?

N1 C4 1.344(12) . ?  
N2 C1 1.329(13) . ?  
N2 C2 1.344(13) . ?  
C7 H7A 0.9600 . ?  
C7 H7B 0.9600 . ?  
C7 H7C 0.9600 . ?  
C2 C3 1.391(15) . ?  
C2 C5 1.484(15) . ?  
C4 C3 1.375(15) . ?  
C4 C6 1.493(13) . ?  
C3 H3 0.9300 . ?  
C5 H5A 0.9600 . ?  
C5 H5B 0.9600 . ?  
C5 H5C 0.9600 . ?  
C6 H6A 0.9600 . ?  
C6 H6B 0.9600 . ?  
C6 H6C 0.9600 . ?

loop\_

\_geom\_angle\_atom\_site\_label\_1  
\_geom\_angle\_atom\_site\_label\_2  
\_geom\_angle\_atom\_site\_label\_3  
\_geom\_angle  
\_geom\_angle\_site\_symmetry\_1  
\_geom\_angle\_site\_symmetry\_3  
\_geom\_angle\_publ\_flag  
C7 Sn1 C7 126.5(4) . 11 ?  
C7 Sn1 C11 100.4(2) . . ?  
C7 Sn1 C11 100.4(2) 11 . ?  
C7 Sn1 S1 114.0(2) . . ?  
C7 Sn1 S1 114.0(2) 11 . ?  
C11 Sn1 S1 91.87(10) . . ?  
C7 Sn1 N1 90.5(2) . . ?  
C7 Sn1 N1 90.5(2) 11 . ?  
C11 Sn1 N1 155.3(2) . . ?  
S1 Sn1 N1 63.4(2) . . ?  
C1 S1 Sn1 87.6(4) . . ?  
C1 N1 C4 118.2(9) . . ?  
C1 N1 Sn1 95.3(6) . . ?  
C4 N1 Sn1 146.6(8) . . ?  
C1 N2 C2 117.8(10) . . ?  
N2 C1 N1 125.8(10) . . ?  
N2 C1 S1 120.5(9) . . ?  
N1 C1 S1 113.7(8) . . ?  
Sn1 C7 H7A 109.5 . . ?  
Sn1 C7 H7B 109.5 . . ?  
H7A C7 H7B 109.5 . . ?  
Sn1 C7 H7C 109.5 . . ?  
H7A C7 H7C 109.5 . . ?  
H7B C7 H7C 109.5 . . ?  
N2 C2 C3 118.3(11) . . ?  
N2 C2 C5 117.1(11) . . ?  
C3 C2 C5 124.6(12) . . ?  
N1 C4 C3 118.1(10) . . ?  
N1 C4 C6 117.6(11) . . ?  
C3 C4 C6 124.3(11) . . ?  
C4 C3 C2 121.8(11) . . ?  
C4 C3 H3 119.1 . . ?

C2 C3 H3 119.1 . . ?  
C2 C5 H5A 109.5 . . ?  
C2 C5 H5B 109.5 . . ?  
H5A C5 H5B 109.5 . . ?  
C2 C5 H5C 109.5 . . ?  
H5A C5 H5C 109.5 . . ?  
H5B C5 H5C 109.5 . . ?  
C4 C6 H6A 109.5 . . ?  
C4 C6 H6B 109.5 . . ?  
H6A C6 H6B 109.5 . . ?  
C4 C6 H6C 109.5 . . ?  
H6A C6 H6C 109.5 . . ?  
H6B C6 H6C 109.5 . . ?

loop\_

\_geom\_torsion\_atom\_site\_label\_1  
\_geom\_torsion\_atom\_site\_label\_2  
\_geom\_torsion\_atom\_site\_label\_3  
\_geom\_torsion\_atom\_site\_label\_4  
\_geom\_torsion  
\_geom\_torsion\_site\_symmetry\_1  
\_geom\_torsion\_site\_symmetry\_2  
\_geom\_torsion\_site\_symmetry\_3  
\_geom\_torsion\_site\_symmetry\_4  
\_geom\_torsion\_publ\_flag  
C2 N2 C1 N1 0.000(1) . . . . ?  
C2 N2 C1 S1 180.000(1) . . . . ?  
C4 N1 C1 N2 0.000(1) . . . . ?  
Sn1 N1 C1 N2 180.000(1) . . . . ?  
C4 N1 C1 S1 180.000(1) . . . . ?  
Sn1 N1 C1 S1 0.000(1) . . . . ?  
Sn1 S1 C1 N2 180.000(1) . . . . ?  
Sn1 S1 C1 N1 0.000(1) . . . . ?  
C1 N2 C2 C3 0.000(1) . . . . ?  
C1 N2 C2 C5 180.000(1) . . . . ?  
C1 N1 C4 C3 0.000(2) . . . . ?  
Sn1 N1 C4 C3 180.000(2) . . . . ?  
C1 N1 C4 C6 180.000(1) . . . . ?  
Sn1 N1 C4 C6 0.000(2) . . . . ?  
N1 C4 C3 C2 0.000(2) . . . . ?  
C6 C4 C3 C2 180.000(2) . . . . ?  
N2 C2 C3 C4 0.000(2) . . . . ?  
C5 C2 C3 C4 180.000(1) . . . . ?

\_refine\_diff\_density\_max 0.663  
\_refine\_diff\_density\_min -0.804  
\_refine\_diff\_density\_rms 0.152

\_shelxl\_version\_number 2014/6

\_shelx\_res\_file

;

TITL SIR2011 run in space group  
CELL 0.71069 8.0000 20.1194 16.7306 90.000 90.000 90.000  
ZERR 16.00 0.0010 0.0036 0.0021 0.000 0.000 0.000  
LATT 7  
SYMM - X, 1/2 - Y, 1/2 + Z  
SYMM X, - Y, - Z



```

SYMM 1/2 - X,   Y, 1/2 - Z
SFAC C   H   N   S   CL   SN
UNIT 64 104 16 8 8 8
MERG  2
FMAP  2
PLAN  25
TEMP 25
SIZE 0.01 0.1 0.2
ACTA
HTAB  2.00000
BOND  $H
CONF
LIST  4
WPDB -2
L.S.  10
TEMP  25.00
WGHT  0.045100
FVAR  0.03027
SN1   6   0.000000   0.378880   0.027447   10.50000   0.06007
0.04864 =
      0.04649  -0.00221   0.00000   0.00000
S1    4   0.000000   0.268445  -0.033248   10.50000   0.09821
0.05458 =
      0.03753  -0.00463   0.00000   0.00000
CL1   5   0.000000   0.432777  -0.102929   10.50000   0.10085
0.07703 =
      0.05331   0.01340   0.00000   0.00000
N1    3   0.000000   0.281973   0.121420   10.50000   0.07049
0.04186 =
      0.04546  -0.00422   0.00000   0.00000
N2    3   0.000000   0.170212   0.075533   10.50000   0.07570
0.04942 =
      0.05745  -0.00147   0.00000   0.00000
C1    1   0.000000   0.235550   0.063952   10.50000   0.07234
0.04998 =
      0.04432  -0.00193   0.00000   0.00000
C7    1   0.245376   0.410493   0.072807   11.00000   0.06536
0.06610 =
      0.07698  -0.00430  -0.00584  -0.00479
AFIX 137
H7A   2   0.247526   0.406148   0.129939   11.00000  -1.50000
H7B   2   0.264671   0.456047   0.058441   11.00000  -1.50000
H7C   2   0.331072   0.383087   0.049846   11.00000  -1.50000
AFIX  0
C2    1   0.000000   0.147990   0.151294   10.50000   0.06940
0.06019 =
      0.06789   0.00582   0.00000   0.00000
C4    1   0.000000   0.261689   0.197975   10.50000   0.06668
0.06649 =
      0.04410  -0.00528   0.00000   0.00000
C3    1   0.000000   0.194473   0.212819   10.50000   0.09925
0.06880 =
      0.04651   0.01275   0.00000   0.00000
AFIX  43
H3    2   0.000000   0.179677   0.265481   10.50000  -1.20000
AFIX  0
C5    1   0.000000   0.074867   0.163130   10.50000   0.14684
0.03934 =

```

```

0.09614    0.01661    0.00000    0.00000
AFIX 137
H5A  2   -0.071600    0.054457    0.124169    10.50000   -1.50000
H5B  2   -0.040062    0.064716    0.215822    10.50000   -1.50000
H5C  2    0.111662    0.058138    0.157052    10.50000   -1.50000
AFIX  0
C6   1    0.000000    0.313899    0.261415    10.50000    0.15109
0.09196 =
0.04311   -0.02290    0.00000    0.00000
AFIX 137
H6A  2    0.112563    0.321869    0.278840    10.50000   -1.50000
H6B  2   -0.066142    0.299145    0.305884    10.50000   -1.50000
H6C  2   -0.046421    0.354246    0.240307    10.50000   -1.50000
AFIX  0
HKLF  4

```

```

REM SIR2011 run in space group
REM R1 = 0.0546 for 814 Fo > 4sig(Fo) and 0.1411 for all 1571
data
REM 79 parameters refined using 0 restraints

```

END

```

WGHT 0.0451 0.0000

```

```

REM No hydrogen bonds found for HTAB generation

```

```

REM Highest difference peak 0.663, deepest hole -0.804, 1-sigma
level 0.152

```

```

Q1  1  0.1532  0.3802  0.0340  11.00000  0.05  0.66
Q2  1  0.2500  0.2495  0.2500  10.50000  0.05  0.48
Q3  1  0.3458  0.3817  0.0994  11.00000  0.05  0.48
Q4  1  0.3091  0.4209 -0.0130  11.00000  0.05  0.45
Q5  1  0.1629  0.3328 -0.0015  11.00000  0.05  0.44
Q6  1  0.2875  0.0280  0.1153  11.00000  0.05  0.43
Q7  1  0.2856  0.4621  0.1843  11.00000  0.05  0.43
Q8  1  0.1488  0.4607  0.1020  11.00000  0.05  0.42
Q9  1  0.2071  0.2153  0.1636  11.00000  0.05  0.42
Q10 1  0.2197  0.4395  0.0154  11.00000  0.05  0.42
Q11 1  0.1816  0.3774 -0.0863  11.00000  0.05  0.41
Q12 1 -0.1441  0.3782  0.2393  11.00000  0.05  0.41
Q13 1  0.2121  0.2592  0.0128  11.00000  0.05  0.40
Q14 1  0.2157  0.1648  0.2205  11.00000  0.05  0.39
Q15 1  0.2705  0.1579  0.1544  11.00000  0.05  0.38
Q16 1  0.1192  0.2188 -0.0781  11.00000  0.05  0.38
Q17 1  0.1035  0.3891 -0.0033  11.00000  0.05  0.38
Q18 1  0.3839  0.3138  0.0258  11.00000  0.05  0.37
Q19 1  0.2785  0.2923  0.3225  11.00000  0.05  0.37
Q20 1  0.2748  0.3627 -0.0265  11.00000  0.05  0.37
Q21 1  0.2684  0.3364  0.2834  11.00000  0.05  0.36
Q22 1 -0.1370  0.3020  0.3302  11.00000  0.05  0.36
Q23 1  0.1964  0.4188  0.2099  11.00000  0.05  0.36
Q24 1  0.3114  0.4223  0.0596  11.00000  0.05  0.36
Q25 1  0.0000  0.4207 -0.0253  10.50000  0.05  0.35

```

```

;
_shelx_res_checksum 56105

```

```

_shelx_hkl_file

```

;

|    |    |    |        |      |
|----|----|----|--------|------|
| -1 | 0  | 0  | 0.08   | 0.07 |
| 0  | -1 | 2  | 0.03   | 0.09 |
| -1 | -1 | 0  | 0.08   | 0.12 |
| -1 | 0  | 1  | -0.06  | 0.11 |
| -1 | -1 | 1  | 78.70  | 1.13 |
| 0  | -3 | 0  | 0.15   | 0.15 |
| 0  | -2 | 2  | 0.25   | 0.09 |
| -1 | -2 | 0  | -0.30  | 0.16 |
| 0  | -3 | 1  | 0.18   | 0.12 |
| -1 | -2 | 1  | -0.03  | 0.12 |
| -1 | 0  | 2  | -0.09  | 0.13 |
| 0  | 0  | 3  | -0.10  | 0.12 |
| -1 | -1 | 2  | 31.49  | 0.68 |
| 0  | -1 | 3  | 0.08   | 0.13 |
| 0  | -3 | 2  | 0.16   | 0.12 |
| -1 | -3 | 0  | 0.15   | 0.15 |
| 0  | -4 | 0  | 76.36  | 1.24 |
| -1 | -2 | 2  | 0.12   | 0.12 |
| -1 | -3 | 1  | 27.57  | 0.71 |
| 0  | -2 | 3  | 9.94   | 0.42 |
| 0  | -4 | 1  | 3.95   | 0.29 |
| -1 | 0  | 3  | 0.08   | 0.13 |
| -1 | -1 | 3  | 55.80  | 1.00 |
| -1 | -3 | 2  | 0.10   | 0.13 |
| 0  | -4 | 2  | 68.05  | 1.13 |
| 0  | -3 | 3  | 0.11   | 0.14 |
| -1 | -4 | 0  | 0.11   | 0.20 |
| 0  | 0  | 4  | 31.39  | 0.76 |
| -1 | -2 | 3  | 0.11   | 0.15 |
| 1  | -4 | -1 | 0.07   | 0.15 |
| 1  | -4 | 1  | 0.04   | 0.15 |
| -1 | -4 | -1 | 0.00   | 0.19 |
| -1 | -4 | 1  | 0.16   | 0.14 |
| 0  | -1 | 4  | -0.06  | 0.15 |
| 0  | -5 | 0  | 0.23   | 0.19 |
| 2  | 0  | 0  | 299.43 | 3.10 |
| -2 | 0  | 0  | 299.77 | 3.09 |
| 2  | -1 | 0  | -0.17  | 0.19 |
| -2 | -1 | 0  | -0.23  | 0.21 |
| 0  | -5 | 1  | 0.19   | 0.16 |
| 0  | -5 | -1 | 0.17   | 0.16 |
| -2 | 0  | -1 | 0.07   | 0.19 |
| 2  | 0  | -1 | -0.08  | 0.17 |
| 2  | 0  | 1  | -0.19  | 0.19 |
| -2 | 0  | 1  | -0.28  | 0.17 |
| 0  | -2 | -4 | 20.11  | 0.66 |
| 0  | -2 | 4  | 18.90  | 0.64 |
| 2  | -1 | -1 | -0.49  | 0.22 |
| 2  | -1 | 1  | 0.17   | 0.15 |
| -2 | -1 | -1 | 0.19   | 0.16 |
| -2 | -1 | 1  | -0.08  | 0.17 |
| -1 | -4 | -2 | 0.14   | 0.10 |
| -1 | -4 | 2  | -0.25  | 0.17 |
| 1  | -4 | 2  | -0.08  | 0.18 |
| 1  | -4 | -2 | 0.00   | 0.15 |
| -1 | -3 | -3 | 52.93  | 1.07 |
| 1  | -3 | 3  | 57.76  | 1.12 |

|    |    |    |       |      |
|----|----|----|-------|------|
| -1 | -3 | 3  | 52.88 | 1.07 |
| 1  | -3 | -3 | 56.82 | 1.10 |
| 0  | -4 | 3  | 3.24  | 0.30 |
| 0  | -4 | -3 | 3.26  | 0.28 |
| -2 | -2 | 0  | 39.64 | 1.03 |
| 2  | -2 | 0  | 42.35 | 0.99 |
| 1  | 0  | 4  | 0.00  | 0.15 |
| -1 | 0  | 4  | 0.18  | 0.14 |
| -1 | 0  | -4 | 0.32  | 0.15 |
| 1  | 0  | -4 | 0.00  | 0.18 |
| -1 | -1 | -4 | 1.62  | 0.19 |
| 1  | -1 | 4  | 1.78  | 0.17 |
| 1  | -1 | -4 | 2.21  | 0.18 |
| -1 | -1 | 4  | 2.04  | 0.19 |
| -2 | -2 | -1 | 6.00  | 0.42 |
| 2  | -2 | -1 | 6.31  | 0.41 |
| -2 | -2 | 1  | 6.25  | 0.40 |
| 2  | -2 | 1  | 6.46  | 0.40 |
| 0  | -5 | 2  | -0.30 | 0.19 |
| 0  | -5 | -2 | -0.21 | 0.19 |
| -2 | 0  | -2 | 70.71 | 1.27 |
| 2  | 0  | 2  | 72.76 | 1.29 |
| -2 | 0  | 2  | 72.21 | 1.29 |
| 2  | 0  | -2 | 78.29 | 1.33 |
| -1 | -5 | 0  | 0.21  | 0.18 |
| 1  | -5 | 0  | -0.11 | 0.21 |
| 2  | -1 | 2  | -0.39 | 0.18 |
| -2 | -1 | -2 | -0.09 | 0.17 |
| 2  | -1 | -2 | -0.11 | 0.15 |
| -2 | -1 | 2  | -0.04 | 0.16 |
| 0  | -3 | -4 | -0.13 | 0.18 |
| 0  | -3 | 4  | -0.38 | 0.19 |
| -1 | -5 | -1 | 51.83 | 1.19 |
| -1 | -5 | 1  | 49.99 | 1.14 |
| 1  | -5 | -1 | 53.78 | 1.15 |
| 1  | -5 | 1  | 56.74 | 1.20 |
| 1  | -2 | -4 | 0.03  | 0.10 |
| -1 | -2 | -4 | 0.09  | 0.16 |
| -1 | -2 | 4  | 0.09  | 0.15 |
| 1  | -2 | 4  | 0.05  | 0.17 |
| 2  | -3 | 0  | 0.07  | 0.17 |
| -2 | -3 | 0  | 0.03  | 0.21 |
| -2 | -2 | 2  | 1.25  | 0.19 |
| 2  | -2 | 2  | 1.63  | 0.17 |
| -2 | -2 | -2 | 1.67  | 0.20 |
| 2  | -2 | -2 | 1.57  | 0.17 |
| 1  | -4 | 3  | 0.09  | 0.16 |
| -1 | -4 | 3  | -0.23 | 0.21 |
| -1 | -4 | -3 | 0.05  | 0.18 |
| 1  | -4 | -3 | -0.45 | 0.20 |
| 2  | -3 | 1  | -0.18 | 0.18 |
| -2 | -3 | 1  | 0.01  | 0.12 |
| 2  | -3 | -1 | -0.15 | 0.17 |
| -2 | -3 | -1 | -0.03 | 0.18 |
| 0  | -6 | 0  | 70.99 | 1.46 |
| 0  | 0  | 5  | -0.09 | 0.16 |
| 0  | 0  | -5 | 0.14  | 0.16 |
| 1  | -5 | -2 | 19.85 | 0.74 |

|    |    |    |       |      |
|----|----|----|-------|------|
| 1  | -5 | 2  | 20.31 | 0.73 |
| -1 | -5 | 2  | 18.48 | 0.72 |
| -1 | -5 | -2 | 19.52 | 0.74 |
| 0  | -1 | -5 | -0.04 | 0.16 |
| 0  | -1 | 5  | 0.11  | 0.16 |
| 0  | -6 | -1 | 6.27  | 0.47 |
| 0  | -6 | 1  | 6.29  | 0.46 |
| 0  | -5 | -3 | -0.02 | 0.18 |
| 0  | -5 | 3  | 0.10  | 0.19 |
| 2  | 0  | -3 | 0.02  | 0.16 |
| -2 | 0  | -3 | -0.19 | 0.19 |
| -2 | 0  | 3  | 0.19  | 0.13 |
| 2  | 0  | 3  | 0.17  | 0.11 |
| 1  | -3 | -4 | 15.53 | 0.63 |
| -1 | -3 | -4 | 13.90 | 0.61 |
| 1  | -3 | 4  | 14.55 | 0.63 |
| -1 | -3 | 4  | 15.68 | 0.64 |
| 0  | -4 | -4 | 21.86 | 0.77 |
| 0  | -4 | 4  | 22.47 | 0.77 |
| 2  | -1 | -3 | -0.10 | 0.21 |
| -2 | -1 | -3 | -0.07 | 0.17 |
| 2  | -1 | 3  | 0.07  | 0.16 |
| -2 | -1 | 3  | -0.27 | 0.19 |
| 2  | -3 | -2 | -0.09 | 0.17 |
| -2 | -3 | -2 | 0.13  | 0.18 |
| -2 | -3 | 2  | -0.30 | 0.22 |
| 2  | -3 | 2  | -0.10 | 0.17 |
| 0  | -2 | 5  | 86.11 | 1.48 |
| 0  | -2 | -5 | 86.00 | 1.46 |
| -2 | -4 | 0  | 21.31 | 0.84 |
| 2  | -4 | 0  | 22.83 | 0.81 |
| 0  | -6 | -2 | 32.04 | 0.94 |
| 0  | -6 | 2  | 29.70 | 0.91 |
| 2  | -2 | 3  | 0.70  | 0.16 |
| -2 | -2 | -3 | 0.93  | 0.16 |
| 2  | -2 | -3 | 1.09  | 0.18 |
| -2 | -2 | 3  | 0.91  | 0.15 |
| -1 | -6 | 0  | 0.15  | 0.18 |
| 1  | -6 | 0  | -0.16 | 0.22 |
| 1  | 0  | -5 | -0.07 | 0.14 |
| -1 | 0  | 5  | 0.22  | 0.15 |
| -1 | 0  | -5 | -0.24 | 0.16 |
| 1  | 0  | 5  | 0.07  | 0.14 |
| 2  | -4 | -1 | 7.35  | 0.47 |
| -2 | -4 | -1 | 8.02  | 0.54 |
| -2 | -4 | 1  | 6.96  | 0.50 |
| 2  | -4 | 1  | 6.88  | 0.47 |
| -1 | -1 | -5 | 2.06  | 0.19 |
| -1 | -1 | 5  | 1.74  | 0.18 |
| 1  | -1 | 5  | 1.92  | 0.18 |
| 1  | -1 | -5 | 2.37  | 0.20 |
| 1  | -6 | 1  | -0.14 | 0.18 |
| -1 | -6 | 1  | -0.09 | 0.19 |
| 1  | -6 | -1 | -0.11 | 0.18 |
| -1 | -6 | -1 | 0.06  | 0.23 |
| -1 | -5 | -3 | 29.50 | 0.93 |
| 1  | -5 | -3 | 30.93 | 0.95 |
| 1  | -5 | 3  | 30.83 | 0.93 |

|    |    |    |       |      |
|----|----|----|-------|------|
| -1 | -5 | 3  | 31.02 | 0.93 |
| 0  | -3 | 5  | 0.13  | 0.11 |
| 0  | -3 | -5 | 0.18  | 0.15 |
| 1  | -4 | -4 | -0.54 | 0.19 |
| 1  | -4 | 4  | -0.29 | 0.21 |
| -1 | -4 | 4  | 0.03  | 0.17 |
| -1 | -4 | -4 | 0.13  | 0.14 |
| -1 | -2 | -5 | -0.18 | 0.20 |
| 1  | -2 | 5  | -0.05 | 0.20 |
| 1  | -2 | -5 | 0.15  | 0.16 |
| -1 | -2 | 5  | -0.34 | 0.20 |
| 2  | -4 | 2  | 32.21 | 0.97 |
| -2 | -4 | -2 | 30.97 | 0.99 |
| 2  | -4 | -2 | 33.65 | 0.97 |
| -2 | -4 | 2  | 32.24 | 1.00 |
| -2 | -3 | 3  | -0.24 | 0.19 |
| 2  | -3 | 3  | 0.00  | 0.17 |
| 2  | -3 | -3 | 0.08  | 0.15 |
| -2 | -3 | -3 | 0.16  | 0.16 |
| -1 | -6 | -2 | 0.15  | 0.16 |
| 1  | -6 | 2  | -0.17 | 0.18 |
| 1  | -6 | -2 | -0.03 | 0.21 |
| -1 | -6 | 2  | -0.09 | 0.19 |
| 0  | -5 | -4 | -0.21 | 0.19 |
| 0  | -5 | 4  | -0.21 | 0.18 |
| -2 | 0  | 4  | 37.73 | 1.04 |
| 2  | 0  | 4  | 35.57 | 1.02 |
| 2  | 0  | -4 | 39.55 | 1.07 |
| -2 | 0  | -4 | 34.13 | 1.00 |
| 0  | -7 | 0  | -0.03 | 0.22 |
| 0  | -6 | 3  | 50.83 | 1.23 |
| 0  | -6 | -3 | 51.02 | 1.23 |
| -2 | -1 | -4 | 0.08  | 0.16 |
| 2  | -1 | -4 | 0.05  | 0.17 |
| -2 | -1 | 4  | -0.16 | 0.18 |
| 2  | -1 | 4  | 0.05  | 0.20 |
| -2 | -5 | 0  | -0.63 | 0.24 |
| 2  | -5 | 0  | 0.32  | 0.15 |
| 0  | -7 | 1  | 0.00  | 0.19 |
| 0  | -7 | -1 | -0.16 | 0.20 |
| -1 | -3 | 5  | 20.63 | 0.78 |
| -1 | -3 | -5 | 19.51 | 0.78 |
| 1  | -3 | 5  | 21.18 | 0.80 |
| 1  | -3 | -5 | 21.20 | 0.80 |
| 2  | -5 | 1  | -0.09 | 0.19 |
| -2 | -5 | -1 | -0.10 | 0.23 |
| 2  | -5 | -1 | -0.09 | 0.18 |
| -2 | -5 | 1  | 0.03  | 0.21 |
| 0  | 0  | 6  | 0.35  | 0.15 |
| 0  | 0  | -6 | 0.53  | 0.13 |
| 0  | -4 | -5 | 20.04 | 0.79 |
| 0  | -4 | 5  | 19.24 | 0.78 |
| 2  | -2 | 4  | 6.39  | 0.47 |
| -2 | -2 | 4  | 6.14  | 0.49 |
| -2 | -2 | -4 | 6.13  | 0.46 |
| 2  | -2 | -4 | 7.63  | 0.50 |
| 0  | -1 | -6 | 0.11  | 0.13 |
| 0  | -1 | 6  | 0.03  | 0.15 |

|    |    |    |       |      |
|----|----|----|-------|------|
| -2 | -4 | -3 | 3.50  | 0.26 |
| -2 | -4 | 3  | 3.02  | 0.25 |
| 2  | -4 | 3  | 3.52  | 0.25 |
| 2  | -4 | -3 | 3.47  | 0.25 |
| 1  | -5 | -4 | 47.76 | 1.21 |
| 1  | -5 | 4  | 50.68 | 1.27 |
| -1 | -5 | -4 | 47.40 | 1.23 |
| -1 | -5 | 4  | 47.18 | 1.19 |
| 0  | -7 | -2 | -0.06 | 0.21 |
| 0  | -7 | 2  | -0.09 | 0.19 |
| -1 | -6 | -3 | 0.00  | 0.21 |
| 1  | -7 | 0  | -0.18 | 0.24 |
| -1 | -6 | 3  | 0.15  | 0.18 |
| 1  | -6 | 3  | -0.03 | 0.20 |
| 1  | -6 | -3 | 0.45  | 0.11 |
| -1 | -7 | 0  | 0.07  | 0.20 |
| -2 | -5 | 2  | 0.09  | 0.14 |
| -2 | -5 | -2 | 0.10  | 0.23 |
| 0  | -2 | 6  | 0.37  | 0.15 |
| 0  | -2 | -6 | 0.42  | 0.14 |
| 2  | -5 | 2  | 0.21  | 0.19 |
| 2  | -5 | -2 | 0.09  | 0.15 |
| 1  | -7 | 1  | 0.49  | 0.18 |
| 1  | -7 | -1 | 0.32  | 0.17 |
| -1 | -7 | -1 | 0.14  | 0.27 |
| -1 | -7 | 1  | 0.20  | 0.18 |
| -3 | 0  | 0  | 0.24  | 0.17 |
| 3  | 0  | 0  | -0.14 | 0.23 |
| -2 | -3 | 4  | -0.24 | 0.20 |
| -2 | -3 | -4 | 0.18  | 0.18 |
| 2  | -3 | 4  | -0.06 | 0.18 |
| 2  | -3 | -4 | -0.23 | 0.18 |
| -3 | -1 | 0  | -0.50 | 0.28 |
| 3  | -1 | 0  | -0.07 | 0.20 |
| 3  | 0  | -1 | -0.07 | 0.20 |
| 1  | 0  | 6  | 0.00  | 0.20 |
| -3 | 0  | 1  | -0.03 | 0.24 |
| -1 | 0  | 6  | 0.10  | 0.13 |
| -1 | 0  | -6 | 0.08  | 0.16 |
| -3 | 0  | -1 | 0.18  | 0.17 |
| 3  | 0  | 1  | 0.10  | 0.22 |
| 1  | 0  | -6 | 0.12  | 0.20 |
| -1 | -4 | 5  | -0.15 | 0.19 |
| 1  | -4 | -5 | -0.09 | 0.18 |
| 1  | -4 | 5  | 0.03  | 0.13 |
| -1 | -4 | -5 | -0.06 | 0.14 |
| 0  | -6 | -4 | 0.75  | 0.16 |
| 0  | -6 | 4  | 0.99  | 0.14 |
| -3 | -1 | 1  | 46.21 | 1.26 |
| -3 | -1 | -1 | 42.71 | 1.30 |
| 3  | -1 | 1  | 44.95 | 1.29 |
| 3  | -1 | -1 | 46.69 | 1.27 |
| -1 | -1 | -6 | 14.85 | 0.70 |
| 1  | -1 | -6 | 16.42 | 0.74 |
| -1 | -1 | 6  | 13.81 | 0.69 |
| 1  | -1 | 6  | 15.20 | 0.70 |
| 3  | -2 | 0  | 0.03  | 0.17 |
| -3 | -2 | 0  | 0.29  | 0.23 |

|    |    |    |       |      |
|----|----|----|-------|------|
| 1  | -7 | -2 | 4.35  | 0.42 |
| -1 | -7 | 2  | 3.85  | 0.29 |
| 0  | -3 | -6 | -0.15 | 0.18 |
| -1 | -7 | -2 | 3.82  | 0.31 |
| 1  | -7 | 2  | 3.61  | 0.30 |
| 0  | -3 | 6  | 0.15  | 0.16 |
| 0  | -5 | 5  | 0.16  | 0.13 |
| 0  | -5 | -5 | 0.06  | 0.17 |
| -2 | -6 | 0  | 9.92  | 0.66 |
| 2  | -6 | 0  | 10.35 | 0.67 |
| -2 | 0  | 5  | -0.12 | 0.20 |
| -2 | 0  | -5 | -0.09 | 0.16 |
| 2  | 0  | 5  | -0.12 | 0.15 |
| 2  | 0  | -5 | 0.03  | 0.17 |
| 0  | -7 | 3  | -0.13 | 0.24 |
| 0  | -7 | -3 | -0.47 | 0.21 |
| -1 | -2 | -6 | -0.03 | 0.14 |
| -1 | -2 | 6  | -0.06 | 0.19 |
| 3  | -2 | 1  | -0.13 | 0.21 |
| 3  | -2 | -1 | -0.09 | 0.20 |
| 1  | -2 | -6 | -0.27 | 0.24 |
| -3 | -2 | -1 | 0.15  | 0.18 |
| -3 | -2 | 1  | 0.04  | 0.22 |
| 1  | -2 | 6  | 0.03  | 0.17 |
| -2 | -1 | 5  | 0.06  | 0.16 |
| 2  | -1 | -5 | -0.19 | 0.18 |
| 2  | -1 | 5  | 0.00  | 0.17 |
| -2 | -1 | -5 | -0.09 | 0.19 |
| 2  | -6 | -1 | 2.89  | 0.24 |
| 3  | 0  | -2 | -0.25 | 0.20 |
| -2 | -6 | 1  | 2.94  | 0.27 |
| -2 | -6 | -1 | 2.86  | 0.29 |
| 2  | -6 | 1  | 3.23  | 0.28 |
| -3 | 0  | -2 | 0.00  | 0.19 |
| -3 | 0  | 2  | 0.20  | 0.12 |
| 3  | 0  | 2  | 0.19  | 0.16 |
| -2 | -5 | -3 | -0.10 | 0.19 |
| 2  | -5 | 3  | -0.03 | 0.17 |
| 2  | -5 | -3 | 0.03  | 0.17 |
| -2 | -5 | 3  | 0.21  | 0.11 |
| 3  | -1 | -2 | 15.16 | 0.76 |
| 3  | -1 | 2  | 13.85 | 0.70 |
| -3 | -1 | -2 | 12.94 | 0.70 |
| -3 | -1 | 2  | 12.53 | 0.73 |
| 0  | -8 | 0  | 28.75 | 1.09 |
| 2  | -4 | 4  | 23.81 | 0.90 |
| -2 | -4 | 4  | 22.56 | 0.90 |
| -2 | -4 | -4 | 24.04 | 0.89 |
| 2  | -4 | -4 | 23.84 | 0.88 |
| 2  | -2 | -5 | 33.10 | 1.06 |
| 1  | -6 | -4 | 0.16  | 0.15 |
| -1 | -6 | 4  | 0.03  | 0.18 |
| -2 | -2 | 5  | 30.71 | 1.02 |
| -1 | -6 | -4 | -0.07 | 0.19 |
| 2  | -2 | 5  | 28.74 | 0.98 |
| 0  | -8 | 1  | 1.66  | 0.26 |
| 0  | -8 | -1 | 1.77  | 0.24 |
| 1  | -6 | 4  | -0.19 | 0.19 |



|    |    |    |       |      |
|----|----|----|-------|------|
| -2 | -2 | -5 | 27.61 | 0.97 |
| 3  | -3 | 0  | -0.16 | 0.20 |
| -3 | -3 | 0  | -0.38 | 0.25 |
| -3 | -2 | 2  | -0.33 | 0.23 |
| -3 | -2 | -2 | -0.10 | 0.20 |
| 3  | -2 | -2 | 0.10  | 0.15 |
| 3  | -2 | 2  | 0.16  | 0.13 |
| 2  | -6 | -2 | 6.47  | 0.50 |
| -2 | -6 | -2 | 5.07  | 0.50 |
| -2 | -6 | 2  | 5.00  | 0.47 |
| 2  | -6 | 2  | 5.77  | 0.49 |
| -1 | -3 | -6 | 66.43 | 1.48 |
| 1  | -3 | 6  | 70.10 | 1.54 |
| 1  | -3 | -6 | 68.68 | 1.53 |
| -1 | -3 | 6  | 70.13 | 1.55 |
| -3 | -3 | -1 | 18.21 | 0.90 |
| 3  | -3 | -1 | 17.08 | 0.88 |
| 3  | -3 | 1  | 15.88 | 0.76 |
| -3 | -3 | 1  | 16.61 | 0.87 |
| -1 | -5 | -5 | 8.93  | 0.58 |
| 1  | -5 | 5  | 8.53  | 0.57 |
| 1  | -5 | -5 | 9.62  | 0.59 |
| -1 | -5 | 5  | 7.85  | 0.58 |
| 0  | -4 | 6  | 9.46  | 0.55 |
| 0  | -4 | -6 | 8.77  | 0.57 |
| 1  | -7 | -3 | 14.98 | 0.75 |
| -1 | -7 | -3 | 14.97 | 0.77 |
| 1  | -7 | 3  | 15.41 | 0.77 |
| -1 | -7 | 3  | 14.55 | 0.75 |
| 0  | -8 | -2 | 83.40 | 1.80 |
| 0  | -8 | 2  | 85.57 | 1.80 |
| -3 | 0  | 3  | -0.23 | 0.24 |
| 3  | 0  | 3  | -0.03 | 0.16 |
| 3  | 0  | -3 | 0.20  | 0.14 |
| -3 | 0  | -3 | 0.23  | 0.20 |
| 1  | -8 | 0  | 0.12  | 0.23 |
| -1 | -8 | 0  | 0.02  | 0.15 |
| -2 | -3 | 5  | -0.19 | 0.18 |
| 2  | -3 | -5 | -0.12 | 0.23 |
| 2  | -3 | 5  | -0.19 | 0.17 |
| -2 | -3 | -5 | 0.00  | 0.14 |
| 0  | 0  | -7 | -0.51 | 0.24 |
| 0  | 0  | 7  | 0.07  | 0.11 |
| 3  | -1 | -3 | 28.15 | 1.10 |
| -3 | -1 | -3 | 26.54 | 1.00 |
| 3  | -1 | 3  | 26.91 | 1.00 |
| -3 | -1 | 3  | 28.04 | 1.01 |
| -3 | -3 | 2  | -0.03 | 0.25 |
| 3  | -3 | 2  | -0.06 | 0.19 |
| -3 | -3 | -2 | 0.00  | 0.20 |
| 3  | -3 | -2 | -0.29 | 0.23 |
| 1  | -8 | -1 | 0.08  | 0.19 |
| -1 | -8 | 1  | 0.23  | 0.21 |
| 1  | -8 | 1  | 0.08  | 0.20 |
| -1 | -8 | -1 | -0.27 | 0.21 |
| 0  | -1 | 7  | 0.26  | 0.21 |
| 0  | -1 | -7 | -0.38 | 0.26 |
| 0  | -7 | -4 | -0.13 | 0.19 |

|    |    |    |       |      |
|----|----|----|-------|------|
| 0  | -7 | 4  | 0.05  | 0.15 |
| 0  | -6 | 5  | 77.25 | 1.66 |
| 0  | -6 | -5 | 76.88 | 1.65 |
| 3  | -4 | 0  | 0.22  | 0.12 |
| -3 | -4 | 0  | 0.00  | 0.17 |
| 2  | -5 | 4  | 0.07  | 0.17 |
| -2 | -5 | -4 | 0.24  | 0.10 |
| -2 | -5 | 4  | 0.14  | 0.16 |
| 2  | -5 | -4 | 0.07  | 0.17 |
| 3  | -2 | -3 | 0.27  | 0.19 |
| -3 | -2 | -3 | 0.16  | 0.13 |
| 3  | -2 | 3  | -0.03 | 0.18 |
| -3 | -2 | 3  | 0.17  | 0.16 |
| -2 | -7 | 0  | -0.16 | 0.18 |
| 2  | -7 | 0  | -0.21 | 0.25 |
| 3  | -4 | 1  | 0.13  | 0.17 |
| -1 | -4 | 6  | 0.20  | 0.16 |
| 1  | -4 | -6 | 0.08  | 0.13 |
| -2 | -6 | 3  | 28.62 | 1.04 |
| 2  | -6 | 3  | 28.52 | 1.05 |
| -2 | -6 | -3 | 25.33 | 1.02 |
| 2  | -6 | -3 | 28.96 | 1.04 |
| -3 | -4 | -1 | 0.12  | 0.21 |
| 3  | -4 | -1 | -0.17 | 0.15 |
| -1 | -4 | -6 | -0.47 | 0.23 |
| -3 | -4 | 1  | -0.04 | 0.24 |
| 1  | -4 | 6  | 0.27  | 0.21 |
| 0  | -2 | 7  | 55.59 | 1.40 |
| 0  | -2 | -7 | 54.47 | 1.38 |
| -2 | -7 | 1  | -0.27 | 0.21 |
| 2  | -7 | -1 | -0.32 | 0.22 |
| 2  | -7 | 1  | -0.27 | 0.25 |
| -2 | -7 | -1 | -0.20 | 0.20 |
| -1 | -8 | -2 | -0.19 | 0.21 |
| 1  | -8 | 2  | -0.26 | 0.22 |
| 1  | -8 | -2 | 0.25  | 0.10 |
| -1 | -8 | 2  | 0.04  | 0.21 |
| 0  | -8 | -3 | 2.71  | 0.29 |
| 0  | -8 | 3  | 2.70  | 0.28 |
| 0  | -5 | -6 | 0.12  | 0.11 |
| 0  | -5 | 6  | -0.07 | 0.21 |
| 1  | 0  | 7  | 0.23  | 0.16 |
| -1 | 0  | -7 | -0.23 | 0.19 |
| 1  | 0  | -7 | -0.10 | 0.24 |
| -1 | 0  | 7  | 0.13  | 0.15 |
| 2  | 0  | 6  | 10.51 | 0.65 |
| -2 | 0  | 6  | 11.40 | 0.67 |
| -2 | 0  | -6 | 10.46 | 0.64 |
| 2  | 0  | -6 | 13.05 | 0.70 |
| -2 | -4 | 5  | 3.06  | 0.26 |
| 2  | -4 | 5  | 3.23  | 0.27 |
| -2 | -4 | -5 | 3.08  | 0.26 |
| 2  | -4 | -5 | 3.95  | 0.30 |
| 1  | -1 | 7  | 3.15  | 0.27 |
| -1 | -1 | 7  | 3.31  | 0.30 |
| 1  | -1 | -7 | 3.39  | 0.28 |
| -1 | -1 | -7 | 2.81  | 0.28 |
| 2  | -1 | -6 | 0.17  | 0.14 |

|    |    |    |       |      |
|----|----|----|-------|------|
| 2  | -1 | 6  | -0.07 | 0.13 |
| -2 | -1 | 6  | 0.21  | 0.17 |
| -2 | -1 | -6 | -0.07 | 0.18 |
| 1  | -6 | 5  | -0.14 | 0.20 |
| -1 | -7 | 4  | 7.06  | 0.57 |
| 1  | -7 | 4  | 6.53  | 0.55 |
| 1  | -7 | -4 | 6.26  | 0.51 |
| -1 | -6 | 5  | 0.14  | 0.16 |
| 1  | -6 | -5 | -0.14 | 0.21 |
| -1 | -7 | -4 | 6.68  | 0.52 |
| -1 | -6 | -5 | 0.11  | 0.18 |
| 3  | -4 | -2 | 0.20  | 0.17 |
| -3 | -4 | 2  | -0.11 | 0.21 |
| -3 | -4 | -2 | -0.16 | 0.22 |
| 3  | -4 | 2  | -0.07 | 0.21 |
| 3  | -3 | 3  | 25.86 | 0.99 |
| -3 | -3 | 3  | 28.46 | 1.06 |
| -3 | -3 | -3 | 27.77 | 1.03 |
| 3  | -3 | -3 | 23.88 | 1.13 |
| 0  | -3 | -7 | 0.17  | 0.20 |
| 0  | -3 | 7  | -0.07 | 0.20 |
| -2 | -7 | -2 | 0.04  | 0.14 |
| 2  | -7 | -2 | 0.07  | 0.23 |
| -3 | 0  | -4 | -0.21 | 0.21 |
| -2 | -7 | 2  | -0.08 | 0.21 |
| 3  | 0  | -4 | -0.18 | 0.21 |
| -3 | 0  | 4  | -0.03 | 0.14 |
| 2  | -7 | 2  | 0.19  | 0.13 |
| 3  | 0  | 4  | 0.07  | 0.16 |
| 0  | -9 | 0  | -0.12 | 0.22 |
| -3 | -1 | 4  | 2.02  | 0.25 |
| 3  | -1 | 4  | 2.43  | 0.25 |
| 3  | -1 | -4 | 2.02  | 0.26 |
| -3 | -1 | -4 | 2.07  | 0.28 |
| 1  | -2 | 7  | -0.07 | 0.18 |
| -1 | -2 | -7 | -0.07 | 0.20 |
| -1 | -2 | 7  | -0.31 | 0.20 |
| 1  | -2 | -7 | 0.07  | 0.18 |
| 2  | -2 | 6  | 0.24  | 0.15 |
| -2 | -2 | -6 | 0.24  | 0.23 |
| -2 | -2 | 6  | 0.18  | 0.13 |
| 2  | -2 | -6 | 0.33  | 0.14 |
| 3  | -5 | 0  | 0.04  | 0.22 |
| -3 | -5 | 0  | -0.55 | 0.29 |
| 0  | -9 | -1 | 0.09  | 0.22 |
| 0  | -9 | 1  | -0.08 | 0.24 |
| 3  | -5 | 1  | 30.38 | 1.13 |
| 3  | -5 | -1 | 31.73 | 1.13 |
| -3 | -5 | -1 | 30.29 | 1.20 |
| 1  | -8 | 3  | 0.23  | 0.21 |
| 1  | -8 | -3 | -0.11 | 0.21 |
| -1 | -5 | 6  | 16.26 | 0.79 |
| -3 | -5 | 1  | 30.16 | 1.19 |
| 1  | -5 | 6  | 15.88 | 0.80 |
| -1 | -8 | -3 | 0.08  | 0.14 |
| -1 | -5 | -6 | 16.31 | 0.84 |
| 1  | -5 | -6 | 16.40 | 0.83 |
| -1 | -8 | 3  | 0.15  | 0.13 |

|    |    |    |       |      |
|----|----|----|-------|------|
| -3 | -2 | 4  | -0.07 | 0.17 |
| -3 | -2 | -4 | 0.11  | 0.19 |
| 3  | -2 | -4 | -0.40 | 0.27 |
| 3  | -2 | 4  | -0.11 | 0.18 |
| -2 | -6 | -4 | -0.07 | 0.20 |
| 2  | -6 | -4 | 0.27  | 0.13 |
| -2 | -6 | 4  | 0.15  | 0.22 |
| 2  | -6 | 4  | 0.07  | 0.24 |
| 0  | -7 | 5  | -0.22 | 0.22 |
| 0  | -7 | -5 | 0.04  | 0.20 |
| 3  | -4 | -3 | 0.14  | 0.17 |
| -3 | -4 | -3 | -0.23 | 0.19 |
| 3  | -4 | 3  | 0.00  | 0.17 |
| -3 | -4 | 3  | 0.00  | 0.19 |
| -1 | -3 | 7  | 13.09 | 0.72 |
| 1  | -3 | 7  | 12.58 | 0.73 |
| -1 | -3 | -7 | 13.68 | 0.72 |
| 1  | -3 | -7 | 14.36 | 0.73 |
| -2 | -3 | 6  | 0.11  | 0.12 |
| -2 | -3 | -6 | -0.11 | 0.21 |
| 2  | -3 | 6  | 0.13  | 0.12 |
| 2  | -3 | -6 | -0.11 | 0.21 |
| 2  | -5 | -5 | -0.07 | 0.24 |
| 2  | -5 | 5  | 0.11  | 0.11 |
| -2 | -5 | 5  | 0.04  | 0.19 |
| -2 | -5 | -5 | -0.29 | 0.25 |
| 0  | -9 | -2 | 0.16  | 0.19 |
| 0  | -9 | 2  | 0.20  | 0.22 |
| 0  | -4 | -7 | 19.99 | 0.89 |
| 0  | -4 | 7  | 20.89 | 0.95 |
| 0  | -8 | 4  | 62.25 | 1.58 |
| 0  | -8 | -4 | 57.47 | 1.56 |
| 2  | -7 | 3  | 0.23  | 0.21 |
| -1 | -9 | 0  | -0.13 | 0.25 |
| -2 | -7 | -3 | 0.28  | 0.20 |
| 2  | -7 | -3 | 0.04  | 0.22 |
| 1  | -9 | 0  | 0.29  | 0.15 |
| -2 | -7 | 3  | 0.12  | 0.18 |
| 3  | -5 | 2  | 10.57 | 0.68 |
| -3 | -5 | 2  | 11.31 | 0.72 |
| -3 | -5 | -2 | 11.42 | 0.74 |
| 3  | -5 | -2 | 11.69 | 0.73 |
| 0  | -6 | -6 | 0.04  | 0.22 |
| 0  | -6 | 6  | -0.04 | 0.22 |
| -1 | -9 | 1  | 57.50 | 1.68 |
| 1  | -9 | 1  | 62.16 | 1.73 |
| 1  | -9 | -1 | 65.20 | 1.77 |
| -1 | -9 | -1 | 64.16 | 1.77 |
| 3  | -3 | 4  | 10.11 | 0.64 |
| 3  | -3 | -4 | 11.70 | 0.77 |
| -3 | -3 | -4 | 9.86  | 0.67 |
| -3 | -3 | 4  | 9.84  | 0.67 |
| 2  | -8 | 0  | 32.35 | 1.31 |
| -2 | -8 | 0  | 30.32 | 1.23 |
| -2 | -8 | 1  | 0.13  | 0.27 |
| 2  | -8 | -1 | -0.12 | 0.23 |
| -2 | -8 | -1 | 0.13  | 0.23 |
| 2  | -8 | 1  | -0.13 | 0.25 |

|    |    |    |       |      |
|----|----|----|-------|------|
| 1  | -7 | 5  | 27.88 | 1.07 |
| -1 | -7 | 5  | 25.12 | 1.04 |
| 1  | -7 | -5 | 28.29 | 1.10 |
| -1 | -7 | -5 | 24.99 | 1.01 |
| 0  | 0  | -8 | 0.26  | 0.16 |
| 0  | 0  | 8  | 0.29  | 0.14 |
| -3 | -6 | 0  | 0.18  | 0.14 |
| 3  | -6 | 0  | 0.30  | 0.10 |
| 3  | 0  | 5  | -0.27 | 0.22 |
| -1 | -9 | 2  | 4.71  | 0.35 |
| -1 | -9 | -2 | 4.60  | 0.38 |
| 1  | -9 | 2  | 4.65  | 0.35 |
| 1  | -9 | -2 | 4.96  | 0.36 |
| 3  | 0  | -5 | -0.19 | 0.21 |
| -3 | 0  | -5 | 0.04  | 0.14 |
| -3 | 0  | 5  | -0.30 | 0.24 |
| -1 | -4 | 7  | -0.11 | 0.20 |
| -1 | -4 | -7 | -0.07 | 0.20 |
| 1  | -4 | 7  | -0.08 | 0.20 |
| 1  | -4 | -7 | 0.00  | 0.16 |
| 2  | -4 | -6 | 18.84 | 0.85 |
| 2  | -4 | 6  | 19.12 | 0.90 |
| -2 | -4 | -6 | 16.62 | 0.83 |
| -2 | -4 | 6  | 16.98 | 0.89 |
| -1 | -8 | 4  | -0.39 | 0.26 |
| 1  | -8 | -4 | -0.12 | 0.20 |
| -1 | -8 | -4 | -0.48 | 0.26 |
| 1  | -8 | 4  | -0.04 | 0.23 |
| 0  | -1 | -8 | -0.11 | 0.14 |
| 0  | -1 | 8  | -0.04 | 0.18 |
| 0  | -9 | -3 | 0.24  | 0.22 |
| 0  | -9 | 3  | -0.16 | 0.25 |
| 3  | -1 | -5 | 2.98  | 0.31 |
| -3 | -1 | 5  | 3.25  | 0.28 |
| 3  | -1 | 5  | 2.99  | 0.27 |
| -3 | -1 | -5 | 2.52  | 0.25 |
| 1  | -6 | -6 | 0.11  | 0.15 |
| 1  | -6 | 6  | -0.04 | 0.21 |
| -3 | -6 | -1 | 0.27  | 0.19 |
| -3 | -6 | 1  | -0.14 | 0.26 |
| 3  | -6 | -1 | 0.19  | 0.18 |
| 3  | -6 | 1  | -0.08 | 0.17 |
| -1 | -6 | -6 | 0.00  | 0.19 |
| -1 | -6 | 6  | -0.23 | 0.19 |
| 3  | -5 | 3  | 21.15 | 1.00 |
| -3 | -5 | 3  | 19.11 | 0.94 |
| -3 | -5 | -3 | 18.14 | 0.93 |
| 3  | -5 | -3 | 20.16 | 0.96 |
| 2  | -8 | 2  | 64.44 | 1.70 |
| -2 | -8 | -2 | 58.19 | 1.70 |
| -2 | -8 | 2  | 66.44 | 1.79 |
| 2  | -8 | -2 | 66.74 | 1.70 |
| 0  | -5 | -7 | -0.30 | 0.24 |
| 0  | -5 | 7  | 0.04  | 0.23 |
| -3 | -4 | 4  | -0.24 | 0.17 |
| 3  | -4 | -4 | 0.11  | 0.20 |
| 3  | -4 | 4  | 0.26  | 0.19 |
| -3 | -4 | -4 | 0.00  | 0.20 |

|    |     |    |        |      |
|----|-----|----|--------|------|
| 2  | 0   | -7 | 0.00   | 0.11 |
| -2 | 0   | 7  | 0.19   | 0.20 |
| 2  | 0   | 7  | 0.04   | 0.19 |
| -2 | 0   | -7 | 0.15   | 0.18 |
| 0  | -2  | 8  | 0.65   | 0.16 |
| 0  | -2  | -8 | 0.69   | 0.17 |
| 3  | -2  | -5 | 0.12   | 0.20 |
| -3 | -2  | -5 | 0.08   | 0.11 |
| 3  | -2  | 5  | -0.27  | 0.18 |
| -3 | -2  | 5  | -0.16  | 0.20 |
| -2 | -1  | 7  | -0.31  | 0.23 |
| 2  | -1  | -7 | 0.11   | 0.20 |
| 2  | -1  | 7  | 0.19   | 0.15 |
| -2 | -1  | -7 | 0.11   | 0.20 |
| 2  | -6  | 5  | 54.35  | 1.55 |
| -2 | -7  | 4  | 0.08   | 0.21 |
| -2 | -6  | -5 | 47.53  | 1.46 |
| -2 | -7  | -4 | 0.08   | 0.21 |
| 2  | -7  | 4  | -0.08  | 0.16 |
| 2  | -6  | -5 | 54.46  | 1.50 |
| -2 | -6  | 5  | 52.99  | 1.50 |
| 2  | -7  | -4 | 0.16   | 0.18 |
| -3 | -6  | -2 | 0.18   | 0.13 |
| -3 | -6  | 2  | -0.04  | 0.21 |
| 3  | -6  | -2 | 0.08   | 0.11 |
| 3  | -6  | 2  | 0.08   | 0.20 |
| -1 | 0   | 8  | -0.30  | 0.30 |
| 1  | 0   | -8 | 0.15   | 0.20 |
| -1 | 0   | -8 | -0.38  | 0.21 |
| 1  | 0   | 8  | -0.11  | 0.17 |
| 1  | -1  | -8 | 11.57  | 0.71 |
| -1 | -1  | -8 | 10.08  | 0.67 |
| -1 | -1  | 8  | 11.19  | 0.68 |
| 1  | -1  | 8  | 10.22  | 0.71 |
| 0  | -10 | 0  | 0.19   | 0.19 |
| -2 | -2  | 7  | 43.01  | 1.37 |
| 2  | -2  | -7 | 41.74  | 1.48 |
| -2 | -2  | -7 | 38.84  | 1.30 |
| 0  | -8  | -5 | 0.20   | 0.19 |
| 2  | -2  | 7  | 44.68  | 1.37 |
| 0  | -8  | 5  | -0.24  | 0.24 |
| 1  | -9  | 3  | 30.68  | 1.19 |
| 1  | -9  | -3 | 29.18  | 1.14 |
| -1 | -9  | 3  | 32.26  | 1.22 |
| -1 | -9  | -3 | 32.15  | 1.22 |
| 0  | -7  | 6  | 0.08   | 0.18 |
| 0  | -7  | -6 | 0.16   | 0.19 |
| 4  | 0   | 0  | 179.06 | 3.10 |
| -4 | 0   | 0  | 179.01 | 3.04 |
| 0  | -10 | 1  | 9.75   | 0.76 |
| 0  | -10 | -1 | 8.56   | 0.71 |
| 0  | -3  | -8 | 0.00   | 0.16 |
| 0  | -3  | 8  | 0.00   | 0.19 |
| -3 | -3  | -5 | 11.89  | 0.73 |
| 3  | -3  | 5  | 11.91  | 0.75 |
| 3  | -3  | -5 | 12.27  | 0.80 |
| -3 | -3  | 5  | 12.67  | 0.76 |
| 4  | -1  | 0  | 0.05   | 0.23 |

|    |     |    |       |      |
|----|-----|----|-------|------|
| -1 | -5  | 7  | -0.08 | 0.19 |
| 1  | -5  | 7  | -0.04 | 0.19 |
| 1  | -5  | -7 | -0.24 | 0.24 |
| -4 | -1  | 0  | 0.00  | 0.26 |
| -1 | -5  | -7 | 0.04  | 0.20 |
| 2  | -8  | 3  | 0.16  | 0.26 |
| -2 | -8  | 3  | 0.49  | 0.18 |
| -2 | -8  | -3 | -0.09 | 0.34 |
| 2  | -8  | -3 | 0.52  | 0.22 |
| -2 | -5  | -6 | -0.20 | 0.24 |
| 2  | -5  | -6 | -0.20 | 0.24 |
| -2 | -5  | 6  | 0.08  | 0.11 |
| 2  | -5  | 6  | 0.12  | 0.15 |
| 4  | 0   | -1 | 0.22  | 0.32 |
| -4 | 0   | 1  | 0.04  | 0.30 |
| -4 | 0   | -1 | -0.25 | 0.33 |
| 4  | 0   | 1  | -0.30 | 0.39 |
| 1  | -2  | 8  | -0.20 | 0.20 |
| 1  | -2  | -8 | 0.08  | 0.22 |
| -1 | -2  | -8 | -0.04 | 0.21 |
| -1 | -2  | 8  | -0.04 | 0.21 |
| 4  | -1  | 1  | -0.15 | 0.23 |
| -4 | -1  | 1  | 0.13  | 0.20 |
| 4  | -1  | -1 | 0.26  | 0.13 |
| -4 | -1  | -1 | -0.15 | 0.29 |
| 0  | -9  | 4  | 0.08  | 0.16 |
| 0  | -9  | -4 | -0.42 | 0.24 |
| -3 | -5  | 4  | 22.68 | 1.04 |
| -3 | -5  | -4 | 23.39 | 1.03 |
| 3  | -5  | -4 | 23.79 | 1.10 |
| 3  | -5  | 4  | 22.83 | 1.04 |
| 2  | -3  | 7  | 0.08  | 0.20 |
| -2 | -3  | 7  | -0.36 | 0.21 |
| -4 | -2  | 0  | 4.09  | 0.38 |
| -2 | -3  | -7 | 0.00  | 0.14 |
| 4  | -2  | 0  | 3.90  | 0.35 |
| 2  | -3  | -7 | 0.08  | 0.23 |
| 0  | -10 | 2  | 0.55  | 0.20 |
| 0  | -10 | -2 | 0.37  | 0.17 |
| -3 | -7  | 0  | 0.28  | 0.23 |
| 3  | -6  | -3 | 0.02  | 0.12 |
| -3 | -6  | -3 | 0.09  | 0.20 |
| 3  | -7  | 0  | 0.14  | 0.18 |
| 3  | -6  | 3  | -0.04 | 0.17 |
| -3 | -6  | 3  | -0.30 | 0.26 |
| 2  | -9  | 0  | -0.10 | 0.24 |
| -2 | -9  | 0  | 0.23  | 0.25 |
| -1 | -10 | 0  | -0.33 | 0.25 |
| 1  | -10 | 0  | -0.25 | 0.28 |
| 1  | -8  | -5 | 0.08  | 0.12 |
| -1 | -8  | -5 | -0.21 | 0.23 |
| 1  | -8  | 5  | 0.08  | 0.21 |
| -1 | -8  | 5  | 0.12  | 0.16 |
| 4  | -2  | 1  | -0.15 | 0.19 |
| 4  | -2  | -1 | -0.48 | 0.24 |
| -4 | -2  | 1  | -0.19 | 0.24 |
| -4 | -2  | -1 | 0.05  | 0.25 |
| 0  | -6  | 7  | 53.40 | 1.53 |

|    |     |    |       |      |
|----|-----|----|-------|------|
| 0  | -6  | -7 | 51.89 | 1.55 |
| -4 | 0   | 2  | 59.77 | 1.69 |
| -4 | 0   | -2 | 57.19 | 1.72 |
| 4  | 0   | -2 | 62.75 | 1.73 |
| 4  | 0   | 2  | 56.83 | 1.66 |
| -3 | -7  | -1 | 0.73  | 0.22 |
| 1  | -7  | -6 | 14.66 | 0.87 |
| 3  | -7  | -1 | 1.23  | 0.20 |
| 3  | -7  | 1  | 0.60  | 0.23 |
| -1 | -7  | 6  | 16.93 | 0.90 |
| 1  | -7  | 6  | 14.90 | 0.87 |
| -3 | -7  | 1  | 0.67  | 0.22 |
| -1 | -7  | -6 | 15.65 | 0.86 |
| -1 | -10 | -1 | 0.10  | 0.15 |
| 2  | -9  | -1 | -0.14 | 0.26 |
| 1  | -10 | 1  | -0.45 | 0.26 |
| -2 | -9  | 1  | 0.14  | 0.22 |
| -2 | -9  | -1 | 0.22  | 0.17 |
| 1  | -10 | -1 | -0.15 | 0.19 |
| -1 | -10 | 1  | 0.19  | 0.15 |
| 2  | -9  | 1  | 0.05  | 0.22 |
| -1 | -3  | 8  | 94.77 | 2.08 |
| 1  | -3  | -8 | 93.75 | 2.05 |
| -1 | -3  | -8 | 91.79 | 2.00 |
| 1  | -3  | 8  | 90.85 | 2.03 |
| 4  | -1  | -2 | 0.34  | 0.13 |
| -4 | -1  | 2  | 0.13  | 0.27 |
| 4  | -1  | 2  | 0.26  | 0.19 |
| -4 | -1  | -2 | -0.14 | 0.21 |
| 0  | -4  | -8 | 2.62  | 0.28 |
| 0  | -4  | 8  | 2.67  | 0.26 |
| -3 | 0   | 6  | 0.04  | 0.18 |
| 3  | 0   | 6  | -0.08 | 0.26 |
| 3  | 0   | -6 | 0.17  | 0.20 |
| -3 | 0   | -6 | 0.28  | 0.13 |
| -3 | -4  | -5 | -0.04 | 0.17 |
| 3  | -4  | -5 | 0.04  | 0.18 |
| 3  | -4  | 5  | 0.06  | 0.13 |
| -3 | -4  | 5  | -0.04 | 0.17 |
| -3 | -1  | 6  | 9.36  | 0.70 |
| -3 | -1  | -6 | 10.23 | 0.68 |
| 3  | -1  | 6  | 10.94 | 0.73 |
| 3  | -1  | -6 | 10.22 | 0.75 |
| -4 | -3  | 0  | 0.10  | 0.22 |
| 4  | -3  | 0  | -0.36 | 0.24 |
| 2  | -7  | -5 | 0.08  | 0.25 |
| -2 | -7  | 5  | 0.13  | 0.20 |
| 2  | -7  | 5  | -0.59 | 0.27 |
| -2 | -7  | -5 | -0.26 | 0.24 |
| -1 | -9  | -4 | 5.04  | 0.38 |
| 1  | -9  | 4  | 5.53  | 0.40 |
| -1 | -9  | 4  | 5.74  | 0.55 |
| 1  | -9  | -4 | 4.86  | 0.37 |
| -4 | -2  | 2  | -0.44 | 0.25 |
| 4  | -2  | 2  | 0.00  | 0.24 |
| 4  | -2  | -2 | 0.04  | 0.19 |
| -4 | -2  | -2 | -0.10 | 0.25 |
| 4  | -3  | -1 | 0.13  | 0.23 |



|    |     |    |       |      |
|----|-----|----|-------|------|
| -4 | -3  | 1  | -0.05 | 0.23 |
| -4 | -3  | -1 | 0.20  | 0.20 |
| 4  | -3  | 1  | -0.05 | 0.24 |
| -3 | -7  | -2 | 2.41  | 0.29 |
| 3  | -7  | 2  | 2.54  | 0.29 |
| 3  | -7  | -2 | 3.06  | 0.28 |
| -3 | -7  | 2  | 2.69  | 0.30 |
| -2 | -9  | -2 | -0.15 | 0.23 |
| -2 | -9  | 2  | 0.05  | 0.24 |
| 2  | -9  | -2 | -0.13 | 0.25 |
| 2  | -9  | 2  | -0.23 | 0.26 |
| -1 | -10 | 2  | 0.00  | 0.24 |
| 1  | -10 | -2 | -0.23 | 0.23 |
| -1 | -10 | -2 | 0.00  | 0.21 |
| -2 | -4  | 7  | 13.83 | 0.82 |
| 2  | -4  | 7  | 13.33 | 0.81 |
| 2  | -4  | -7 | 12.42 | 0.84 |
| 1  | -10 | 2  | -0.19 | 0.27 |
| -2 | -4  | -7 | 12.67 | 0.79 |
| -2 | -8  | 4  | 44.80 | 1.46 |
| -2 | -8  | -4 | 44.08 | 1.51 |
| 2  | -8  | -4 | 46.65 | 1.47 |
| 2  | -8  | 4  | 45.17 | 1.47 |
| -3 | -2  | 6  | 0.21  | 0.23 |
| 3  | -2  | -6 | 0.12  | 0.22 |
| 0  | -10 | -3 | 14.70 | 0.88 |
| 3  | -2  | 6  | -0.13 | 0.22 |
| -3 | -2  | -6 | -0.30 | 0.25 |
| 0  | -10 | 3  | 14.45 | 0.87 |
| -1 | -6  | 7  | 0.13  | 0.16 |
| 1  | -6  | 7  | 0.17  | 0.13 |
| 1  | -6  | -7 | 0.17  | 0.17 |
| -1 | -6  | -7 | -0.09 | 0.17 |
| -2 | -6  | 6  | 2.89  | 0.29 |
| -2 | -6  | -6 | 2.99  | 0.28 |
| 2  | -6  | 6  | 2.70  | 0.31 |
| 2  | -6  | -6 | 3.29  | 0.30 |
| 4  | 0   | 3  | 0.09  | 0.22 |
| -4 | 0   | 3  | 0.00  | 0.21 |
| 4  | 0   | -3 | 0.13  | 0.23 |
| -4 | 0   | -3 | -0.11 | 0.15 |
| 1  | -4  | -8 | 0.21  | 0.22 |
| 1  | -4  | 8  | 0.21  | 0.23 |
| -1 | -4  | 8  | -0.05 | 0.27 |
| -1 | -4  | -8 | 0.17  | 0.22 |
| -4 | -1  | 3  | 0.00  | 0.19 |
| 4  | -1  | -3 | -0.21 | 0.29 |
| -4 | -1  | -3 | 0.18  | 0.21 |
| 4  | -1  | 3  | -0.26 | 0.26 |
| -4 | -3  | 2  | 0.19  | 0.27 |
| -4 | -3  | -2 | -0.05 | 0.21 |
| 4  | -3  | -2 | -0.13 | 0.22 |
| 4  | -3  | 2  | -0.09 | 0.17 |
| 0  | -8  | 6  | 30.75 | 1.21 |
| -3 | -6  | 4  | 0.20  | 0.13 |
| 3  | -6  | -4 | -0.42 | 0.24 |
| -3 | -6  | -4 | -0.14 | 0.18 |
| 3  | -6  | 4  | 0.04  | 0.22 |

|    |     |    |       |      |
|----|-----|----|-------|------|
| 0  | -8  | -6 | 32.09 | 1.26 |
| 0  | -9  | -5 | -0.22 | 0.19 |
| 0  | -9  | 5  | -0.18 | 0.20 |
| 0  | 0   | -9 | 0.04  | 0.19 |
| 0  | 0   | 9  | 0.17  | 0.20 |
| -4 | -4  | 0  | 22.20 | 1.16 |
| 4  | -4  | 0  | 24.08 | 1.15 |
| 0  | -5  | -8 | 0.04  | 0.19 |
| 0  | -5  | 8  | 0.13  | 0.22 |
| 2  | 0   | -8 | 4.71  | 0.39 |
| -2 | 0   | -8 | 5.09  | 0.51 |
| -2 | 0   | 8  | 4.15  | 0.34 |
| 2  | 0   | 8  | 5.40  | 0.52 |
| -3 | -3  | 6  | 39.98 | 1.42 |
| 3  | -3  | 6  | 35.78 | 1.29 |
| -3 | -3  | -6 | 34.02 | 1.30 |
| 3  | -3  | -6 | 39.57 | 1.42 |
| -3 | -5  | -5 | 5.58  | 0.40 |
| 3  | -5  | -5 | 6.13  | 0.60 |
| -3 | -5  | 5  | 5.87  | 0.42 |
| 3  | -5  | 5  | 5.95  | 0.58 |
| 4  | -2  | -3 | 4.36  | 0.38 |
| -4 | -2  | 3  | 5.02  | 0.36 |
| 4  | -2  | 3  | 5.76  | 0.53 |
| 0  | -1  | 9  | 0.00  | 0.25 |
| -4 | -2  | -3 | 4.45  | 0.37 |
| 0  | -1  | -9 | -0.13 | 0.27 |
| 4  | -4  | 1  | 0.20  | 0.23 |
| -4 | -4  | -1 | 0.21  | 0.24 |
| 4  | -4  | -1 | -0.26 | 0.22 |
| -4 | -4  | 1  | -0.05 | 0.27 |
| -2 | -1  | -8 | -0.05 | 0.23 |
| 2  | -1  | -8 | -0.04 | 0.23 |
| 2  | -1  | 8  | 0.17  | 0.13 |
| -2 | -1  | 8  | -0.35 | 0.23 |
| 3  | -7  | -3 | 11.56 | 0.74 |
| 3  | -7  | 3  | 10.27 | 0.75 |
| -3 | -7  | 3  | 11.55 | 0.76 |
| -3 | -7  | -3 | 11.45 | 0.79 |
| 1  | -10 | 3  | -0.09 | 0.22 |
| 2  | -9  | -3 | -0.13 | 0.23 |
| -1 | -10 | -3 | 0.31  | 0.15 |
| 2  | -9  | 3  | -0.09 | 0.27 |
| 1  | -10 | -3 | 0.00  | 0.19 |
| -1 | -10 | 3  | -0.10 | 0.25 |
| -2 | -9  | 3  | -0.14 | 0.25 |
| -2 | -9  | -3 | 0.00  | 0.27 |
| 0  | -7  | -7 | 0.13  | 0.17 |
| 0  | -7  | 7  | -0.13 | 0.17 |
| -3 | -8  | 0  | 0.45  | 0.15 |
| 3  | -8  | 0  | -0.57 | 0.34 |
| 0  | -11 | 0  | 0.10  | 0.23 |
| 0  | -2  | 9  | 47.08 | 1.48 |
| 2  | -5  | 7  | -0.04 | 0.26 |
| 2  | -5  | -7 | -0.38 | 0.28 |
| -2 | -5  | -7 | -0.04 | 0.26 |
| -2 | -5  | 7  | -0.09 | 0.18 |
| 0  | -2  | -9 | 46.50 | 1.50 |

|    |     |    |       |      |
|----|-----|----|-------|------|
| 2  | -2  | 8  | 1.67  | 0.27 |
| -2 | -2  | 8  | 2.12  | 0.27 |
| -2 | -2  | -8 | 1.79  | 0.26 |
| 2  | -2  | -8 | 1.81  | 0.25 |
| 3  | -8  | 1  | -0.05 | 0.25 |
| 1  | -8  | -6 | -0.09 | 0.23 |
| 1  | -8  | 6  | -0.50 | 0.25 |
| -1 | -8  | -6 | -0.13 | 0.20 |
| -3 | -8  | -1 | -0.05 | 0.25 |
| -1 | -8  | 6  | -0.09 | 0.21 |
| 3  | -8  | -1 | 0.18  | 0.14 |
| -3 | -8  | 1  | 0.26  | 0.24 |
| 0  | -11 | -1 | -0.32 | 0.22 |
| 0  | -11 | 1  | 0.15  | 0.15 |
| 4  | -4  | 2  | 21.59 | 1.03 |
| -4 | -4  | -2 | 21.02 | 1.13 |
| 4  | -4  | -2 | 25.65 | 1.16 |
| -4 | -4  | 2  | 23.49 | 1.15 |
| 0  | -10 | -4 | 2.62  | 0.30 |
| 0  | -10 | 4  | 3.52  | 0.31 |
| 4  | -3  | 3  | -0.04 | 0.15 |
| -4 | -3  | 3  | 0.14  | 0.18 |
| 4  | -3  | -3 | 0.22  | 0.18 |
| -4 | -3  | -3 | -0.14 | 0.22 |
| -1 | -9  | -5 | 26.26 | 1.17 |
| 1  | 0   | -9 | -0.39 | 0.25 |
| -1 | 0   | -9 | -0.13 | 0.22 |
| -1 | 0   | 9  | 0.09  | 0.19 |
| 1  | -9  | -5 | 27.19 | 1.16 |
| -1 | -9  | 5  | 26.95 | 1.20 |
| 1  | 0   | 9  | -0.34 | 0.25 |
| 1  | -9  | 5  | 27.57 | 1.20 |
| 1  | -5  | 8  | 20.01 | 1.01 |
| 1  | -5  | -8 | 19.79 | 0.96 |
| -1 | -5  | 8  | 17.59 | 0.95 |
| -1 | -5  | -8 | 18.40 | 0.95 |
| 4  | 0   | 4  | 12.15 | 0.82 |
| 4  | 0   | -4 | 13.39 | 0.86 |
| -4 | 0   | -4 | 12.01 | 0.80 |
| -4 | 0   | 4  | 13.24 | 0.82 |
| 1  | -1  | -9 | 3.81  | 0.35 |
| -1 | -1  | -9 | 3.78  | 0.34 |
| -1 | -1  | 9  | 4.06  | 0.32 |
| 1  | -1  | 9  | 3.63  | 0.32 |
| 3  | -4  | -6 | -0.39 | 0.25 |
| -3 | -4  | -6 | 0.13  | 0.17 |
| 3  | -4  | 6  | -0.52 | 0.28 |
| -3 | -4  | 6  | 0.05  | 0.23 |
| -4 | -1  | -4 | -0.04 | 0.19 |
| -4 | -1  | 4  | 0.05  | 0.12 |
| 4  | -1  | 4  | 0.05  | 0.22 |
| -2 | -10 | 0  | 0.71  | 0.19 |
| 2  | -10 | 0  | 0.80  | 0.26 |
| 4  | -1  | -4 | 0.32  | 0.12 |
| -2 | -8  | -5 | 2.12  | 0.26 |
| 2  | -8  | -5 | 1.97  | 0.26 |
| 2  | -8  | 5  | 2.21  | 0.29 |
| -2 | -8  | 5  | 2.33  | 0.27 |

|    |     |    |       |      |
|----|-----|----|-------|------|
| 0  | -3  | 9  | 0.20  | 0.15 |
| 0  | -3  | -9 | -0.22 | 0.19 |
| -1 | -7  | 7  | 0.52  | 0.15 |
| 1  | -7  | 7  | 0.00  | 0.17 |
| 1  | -7  | -7 | 0.33  | 0.17 |
| 4  | -5  | 0  | 0.05  | 0.23 |
| -4 | -5  | 0  | -0.21 | 0.27 |
| -1 | -7  | -7 | -0.27 | 0.27 |
| -2 | -7  | 6  | 0.09  | 0.20 |
| 2  | -7  | -6 | 0.18  | 0.18 |
| 2  | -7  | 6  | -0.27 | 0.22 |
| -2 | -7  | -6 | 0.27  | 0.19 |
| 3  | -8  | -2 | 0.00  | 0.19 |
| 3  | -8  | 2  | 0.33  | 0.24 |
| -3 | -8  | 2  | 0.00  | 0.18 |
| -3 | -8  | -2 | -0.42 | 0.28 |
| 2  | -10 | 1  | 8.62  | 0.80 |
| 0  | -11 | 2  | 0.16  | 0.15 |
| 0  | -11 | -2 | -0.15 | 0.27 |
| -2 | -10 | 1  | 10.06 | 0.81 |
| -2 | -10 | -1 | 8.51  | 0.72 |
| 2  | -10 | -1 | 8.70  | 0.73 |
| 2  | -3  | 8  | 0.27  | 0.19 |
| 2  | -3  | -8 | -0.13 | 0.20 |
| -2 | -3  | 8  | -0.13 | 0.26 |
| -2 | -3  | -8 | 0.27  | 0.19 |
| 1  | -11 | 0  | -0.11 | 0.29 |
| -1 | -11 | 0  | 0.05  | 0.22 |
| -1 | -2  | -9 | -0.22 | 0.22 |
| 1  | -2  | 9  | -0.09 | 0.21 |
| -1 | -2  | 9  | 0.18  | 0.20 |
| 1  | -2  | -9 | 0.00  | 0.19 |
| 4  | -5  | -1 | -0.04 | 0.29 |
| -4 | -5  | 1  | 0.11  | 0.15 |
| -4 | -5  | -1 | 0.00  | 0.23 |
| 4  | -5  | 1  | 0.14  | 0.21 |
| 3  | 0   | 7  | -0.35 | 0.28 |
| -3 | 0   | -7 | 0.22  | 0.14 |
| -3 | 0   | 7  | -0.22 | 0.30 |
| 3  | 0   | -7 | -0.14 | 0.21 |
| -4 | -2  | -4 | 2.05  | 0.27 |
| -4 | -2  | 4  | 2.20  | 0.26 |
| 4  | -2  | -4 | 1.87  | 0.28 |
| 4  | -2  | 4  | 2.33  | 0.28 |
| 0  | -6  | 8  | 0.27  | 0.25 |
| 0  | -6  | -8 | 0.38  | 0.15 |
| 3  | -1  | -7 | 2.14  | 0.28 |
| -1 | -11 | -1 | 24.46 | 1.23 |
| 1  | -11 | -1 | 27.39 | 1.32 |
| 3  | -1  | 7  | 2.35  | 0.28 |
| -3 | -1  | 7  | 2.47  | 0.27 |
| -3 | -1  | -7 | 1.87  | 0.26 |
| 1  | -11 | 1  | 26.35 | 1.26 |
| -1 | -11 | 1  | 25.54 | 1.26 |
| -3 | -6  | -5 | -0.28 | 0.20 |
| 3  | -6  | 5  | -0.50 | 0.23 |
| -3 | -7  | 4  | 4.58  | 0.39 |
| 3  | -7  | 4  | 4.98  | 0.36 |

|    |     |    |       |      |
|----|-----|----|-------|------|
| -3 | -7  | -4 | 5.02  | 0.41 |
| 3  | -6  | -5 | -0.04 | 0.24 |
| 3  | -7  | -4 | 5.47  | 0.40 |
| -3 | -6  | 5  | -0.09 | 0.22 |
| 2  | -9  | -4 | 0.14  | 0.21 |
| 2  | -9  | 4  | 0.19  | 0.27 |
| -2 | -9  | -4 | -0.20 | 0.22 |
| -2 | -9  | 4  | 0.10  | 0.21 |
| -1 | -10 | -4 | 0.10  | 0.22 |
| -1 | -10 | 4  | 0.05  | 0.21 |
| 1  | -10 | -4 | 0.19  | 0.15 |
| 1  | -10 | 4  | -0.19 | 0.24 |
| -4 | -4  | 3  | 0.45  | 0.19 |
| 4  | -4  | 3  | -0.22 | 0.25 |
| -4 | -4  | -3 | 0.00  | 0.27 |
| 4  | -4  | -3 | 0.14  | 0.26 |
| 2  | -10 | -2 | 0.10  | 0.14 |
| -2 | -10 | 2  | -0.05 | 0.18 |
| -2 | -10 | -2 | 0.05  | 0.16 |
| 2  | -10 | 2  | 0.05  | 0.26 |
| 3  | -2  | 7  | 0.09  | 0.20 |
| -3 | -2  | -7 | 0.23  | 0.11 |
| 3  | -2  | -7 | -0.45 | 0.28 |
| -3 | -2  | 7  | 0.05  | 0.20 |
| -4 | -5  | 2  | 0.05  | 0.22 |
| 4  | -5  | -2 | 0.05  | 0.23 |
| 4  | -5  | 2  | 0.09  | 0.10 |
| -4 | -5  | -2 | 0.00  | 0.23 |
| -2 | -6  | 7  | 43.42 | 1.51 |
| -2 | -6  | -7 | 38.34 | 1.42 |
| 2  | -6  | -7 | 40.12 | 1.55 |
| 2  | -6  | 7  | 40.90 | 1.47 |
| -1 | -3  | -9 | 0.23  | 0.19 |
| 1  | -3  | -9 | 0.09  | 0.23 |
| -1 | -3  | 9  | -0.45 | 0.23 |
| 1  | -3  | 9  | -0.27 | 0.25 |
| -1 | -11 | -2 | 5.40  | 0.42 |
| 0  | -9  | 6  | 0.09  | 0.24 |
| 1  | -11 | -2 | 5.67  | 0.43 |
| 0  | -9  | -6 | 0.09  | 0.21 |
| -1 | -11 | 2  | 4.82  | 0.44 |
| 1  | -11 | 2  | 6.01  | 0.44 |
| 0  | -4  | 9  | 0.16  | 0.17 |
| 0  | -4  | -9 | 0.14  | 0.28 |
| 4  | -3  | 4  | 0.14  | 0.21 |
| -4 | -3  | 4  | 0.10  | 0.21 |
| -4 | -3  | -4 | 0.00  | 0.17 |
| 4  | -3  | -4 | -0.28 | 0.28 |
| -2 | -4  | -8 | 5.06  | 0.38 |
| -2 | -4  | 8  | 4.12  | 0.37 |
| 2  | -4  | 8  | 4.36  | 0.39 |
| 2  | -4  | -8 | 4.94  | 0.38 |
| 3  | -5  | -6 | 9.00  | 0.74 |
| 3  | -5  | 6  | 10.52 | 0.75 |
| 3  | -8  | -3 | -0.18 | 0.21 |
| -3 | -8  | 3  | -0.31 | 0.25 |
| -3 | -8  | -3 | 0.05  | 0.19 |
| 3  | -8  | 3  | 0.19  | 0.19 |

|    |     |    |       |      |
|----|-----|----|-------|------|
| -3 | -5  | 6  | 9.78  | 0.75 |
| -3 | -5  | -6 | 9.94  | 0.71 |
| 0  | -11 | -3 | -0.10 | 0.20 |
| 0  | -11 | 3  | 0.00  | 0.30 |
| -1 | -6  | 8  | -0.37 | 0.24 |
| -1 | -6  | -8 | -0.09 | 0.18 |
| 1  | -6  | -8 | 0.00  | 0.16 |
| 1  | -6  | 8  | -0.19 | 0.21 |
| 0  | -8  | 7  | 0.23  | 0.22 |
| 0  | -8  | -7 | 0.23  | 0.14 |
| 0  | -10 | 5  | 3.12  | 0.36 |
| 0  | -10 | -5 | 3.31  | 0.34 |
| 3  | -3  | -7 | 5.38  | 0.43 |
| 3  | -3  | 7  | 4.16  | 0.39 |
| -3 | -3  | -7 | 4.97  | 0.39 |
| -3 | -3  | 7  | 5.89  | 0.57 |
| -4 | -6  | 0  | 12.60 | 0.93 |
| 4  | -6  | 0  | 14.52 | 0.84 |
| -4 | 0   | 5  | 0.00  | 0.20 |
| -4 | 0   | -5 | -0.33 | 0.22 |
| 4  | 0   | -5 | -0.29 | 0.29 |
| 4  | 0   | 5  | 0.09  | 0.18 |
| 3  | -9  | 0  | 0.00  | 0.20 |
| -3 | -9  | 0  | -0.27 | 0.23 |
| -4 | -1  | -5 | -0.05 | 0.26 |
| 4  | -1  | 5  | -0.52 | 0.29 |
| -4 | -1  | 5  | 0.09  | 0.21 |
| 2  | -10 | 3  | 19.43 | 1.06 |
| -2 | -10 | 3  | 18.97 | 1.06 |
| 2  | -10 | -3 | 16.71 | 1.05 |
| 4  | -1  | -5 | -0.19 | 0.27 |
| -2 | -10 | -3 | 16.48 | 1.01 |
| -4 | -6  | 1  | 1.27  | 0.29 |
| 4  | -6  | 1  | 1.20  | 0.27 |
| 4  | -6  | -1 | 1.66  | 0.26 |
| -4 | -6  | -1 | 1.53  | 0.23 |
| -4 | -5  | 3  | -0.25 | 0.25 |
| 4  | -5  | -3 | 0.05  | 0.21 |
| -4 | -5  | -3 | 0.26  | 0.22 |
| 4  | -5  | 3  | 0.09  | 0.17 |
| -3 | -9  | -1 | 34.46 | 1.54 |
| -1 | -9  | 6  | 2.99  | 0.33 |
| 3  | -9  | 1  | 36.75 | 1.54 |
| -3 | -9  | 1  | 33.08 | 1.46 |
| 1  | -9  | 6  | 3.31  | 0.33 |
| -1 | -9  | -6 | 2.65  | 0.34 |
| 1  | -9  | -6 | 3.11  | 0.32 |
| 3  | -9  | -1 | 34.26 | 1.45 |
| 1  | -4  | 9  | 0.07  | 0.11 |
| -1 | -4  | 9  | -0.09 | 0.19 |
| -1 | -4  | -9 | 0.05  | 0.26 |
| 1  | -4  | -9 | 0.14  | 0.14 |
| 1  | -11 | -3 | 9.79  | 0.73 |
| 4  | -4  | -4 | 10.34 | 0.76 |
| -4 | -4  | -4 | 8.59  | 0.79 |
| -1 | -11 | 3  | 8.66  | 0.74 |
| -4 | -4  | 4  | 10.22 | 0.73 |
| 1  | -11 | 3  | 8.34  | 0.81 |

|    |     |    |       |      |
|----|-----|----|-------|------|
| 4  | -4  | 4  | 8.89  | 0.70 |
| -1 | -11 | -3 | 8.59  | 0.75 |
| -1 | -8  | 7  | -0.05 | 0.20 |
| -1 | -8  | -7 | 0.10  | 0.21 |
| 1  | -8  | -7 | 0.14  | 0.13 |
| 1  | -8  | 7  | 0.12  | 0.11 |
| 2  | -8  | 6  | 23.88 | 1.17 |
| -2 | -8  | -6 | 18.68 | 1.05 |
| -2 | -8  | 6  | 24.27 | 1.14 |
| 4  | -2  | 5  | 20.83 | 1.08 |
| -4 | -2  | 5  | 20.73 | 1.10 |
| 4  | -2  | -5 | 22.74 | 1.08 |
| 2  | -8  | -6 | 22.90 | 1.17 |
| -4 | -2  | -5 | 21.24 | 1.08 |
| 0  | -7  | -8 | 0.09  | 0.18 |
| 0  | -7  | 8  | -0.19 | 0.18 |
| 3  | -7  | -5 | 13.12 | 0.91 |
| 0  | -5  | -9 | 0.24  | 0.19 |
| 3  | -7  | 5  | 14.11 | 0.90 |
| -3 | -7  | -5 | 12.00 | 0.86 |
| -3 | -7  | 5  | 11.84 | 0.87 |
| 0  | -5  | 9  | 0.05  | 0.21 |
| -2 | -9  | -5 | 0.36  | 0.25 |
| -2 | 0   | -9 | 0.26  | 0.15 |
| 1  | -10 | 5  | -0.10 | 0.23 |
| -2 | -9  | 5  | 0.15  | 0.14 |
| 1  | -10 | -5 | 0.15  | 0.19 |
| 2  | -9  | -5 | -0.10 | 0.19 |
| -1 | -10 | 5  | 0.10  | 0.18 |
| 2  | 0   | 9  | 0.00  | 0.16 |
| -2 | 0   | 9  | -0.18 | 0.21 |
| 2  | -9  | 5  | -0.10 | 0.23 |
| -1 | -10 | -5 | 0.10  | 0.19 |
| 2  | 0   | -9 | -0.23 | 0.23 |
| -2 | -5  | 8  | -0.38 | 0.22 |
| -2 | -5  | -8 | -0.14 | 0.25 |
| 2  | -5  | 8  | -0.28 | 0.26 |
| 2  | -5  | -8 | 0.00  | 0.20 |
| -4 | -6  | -2 | 5.82  | 0.46 |
| 4  | -6  | -2 | 6.00  | 0.55 |
| -4 | -6  | 2  | 6.03  | 0.47 |
| 4  | -6  | 2  | 5.58  | 0.45 |
| -2 | -1  | -9 | 0.33  | 0.24 |
| -2 | -1  | 9  | -0.23 | 0.26 |
| 2  | -1  | 9  | -0.28 | 0.25 |
| 2  | -1  | -9 | -0.05 | 0.23 |
| -3 | -4  | -7 | 0.10  | 0.18 |
| 3  | -4  | 7  | -0.09 | 0.19 |
| 3  | -4  | -7 | -0.14 | 0.25 |
| 3  | -9  | 2  | 3.60  | 0.34 |
| 3  | -9  | -2 | 3.21  | 0.34 |
| -3 | -9  | -2 | 3.23  | 0.34 |
| -3 | -9  | 2  | 3.50  | 0.37 |
| -3 | -4  | 7  | 0.41  | 0.13 |
| 0  | -12 | 0  | 13.29 | 0.89 |
| 0  | -11 | -4 | 0.05  | 0.26 |
| 3  | -8  | 4  | 0.05  | 0.27 |
| -3 | -8  | 4  | -0.15 | 0.23 |

|    |     |     |       |      |
|----|-----|-----|-------|------|
| 0  | -11 | 4   | -0.40 | 0.29 |
| -3 | -8  | -4  | -0.21 | 0.30 |
| 3  | -8  | -4  | -0.24 | 0.27 |
| 0  | 0   | -10 | 0.34  | 0.19 |
| 0  | 0   | 10  | 0.10  | 0.24 |
| 3  | -6  | -6  | -0.23 | 0.26 |
| -3 | -6  | 6   | 0.00  | 0.21 |
| 3  | -6  | 6   | 0.14  | 0.19 |
| -3 | -6  | -6  | -0.05 | 0.24 |
| -2 | -7  | -7  | -0.14 | 0.22 |
| 2  | -7  | 7   | 0.15  | 0.22 |
| -2 | -7  | 7   | 0.05  | 0.21 |
| 2  | -7  | -7  | 0.05  | 0.21 |
| 0  | -12 | -1  | 2.86  | 0.37 |
| 0  | -12 | 1   | 3.19  | 0.36 |
| 0  | -1  | 10  | -0.09 | 0.27 |
| 0  | -1  | -10 | 0.10  | 0.21 |
| -4 | -3  | -5  | -0.25 | 0.25 |
| 4  | -3  | 5   | -0.29 | 0.29 |
| -2 | -11 | 0   | -0.06 | 0.16 |
| 4  | -3  | -5  | 0.00  | 0.29 |
| -4 | -3  | 5   | -0.25 | 0.25 |
| 2  | -11 | 0   | 0.21  | 0.15 |
| 2  | -2  | -9  | 51.78 | 1.79 |
| -2 | -2  | -9  | 48.35 | 1.62 |
| 2  | -2  | 9   | 49.16 | 1.66 |
| -2 | -2  | 9   | 49.25 | 1.65 |
| -2 | -11 | -1  | -0.17 | 0.22 |
| -2 | -11 | 1   | -0.06 | 0.23 |
| 2  | -11 | 1   | 0.18  | 0.23 |
| 2  | -11 | -1  | 0.06  | 0.20 |
| 1  | -7  | 8   | 10.94 | 0.78 |
| 1  | -7  | -8  | 12.20 | 0.83 |
| -1 | -7  | 8   | 11.81 | 0.78 |
| -1 | -7  | -8  | 11.73 | 0.82 |
| -1 | -5  | -9  | 1.72  | 0.26 |
| -1 | -5  | 9   | 1.35  | 0.26 |
| 2  | -10 | -4  | 3.32  | 0.37 |
| -2 | -10 | 4   | 3.50  | 0.35 |
| 1  | -5  | -9  | 1.23  | 0.26 |
| -2 | -10 | -4  | 3.50  | 0.36 |
| 2  | -10 | 4   | 3.03  | 0.36 |
| 1  | -5  | 9   | 1.56  | 0.23 |
| 0  | -2  | 10  | 2.13  | 0.26 |
| 0  | -2  | -10 | 1.53  | 0.25 |
| -4 | -5  | -4  | -0.74 | 0.31 |
| 4  | -5  | -4  | 0.19  | 0.19 |
| 4  | -5  | 4   | -0.05 | 0.20 |
| -4 | -5  | 4   | 0.15  | 0.15 |
| -3 | 0   | 8   | 0.10  | 0.25 |
| -3 | 0   | -8  | -0.10 | 0.23 |
| 3  | 0   | 8   | 0.10  | 0.25 |
| 3  | 0   | -8  | -0.40 | 0.32 |
| 0  | -12 | 2   | 18.90 | 1.18 |
| 0  | -12 | -2  | 19.38 | 1.18 |
| 4  | -7  | 0   | 0.05  | 0.18 |
| -4 | -7  | 0   | 0.25  | 0.15 |
| 4  | -6  | 3   | 13.85 | 0.90 |



|    |     |     |       |      |
|----|-----|-----|-------|------|
| 4  | -6  | -3  | 13.54 | 0.85 |
| -4 | -6  | -3  | 13.04 | 0.96 |
| -4 | -6  | 3   | 12.92 | 0.93 |
| 1  | -12 | 0   | 0.12  | 0.14 |
| -1 | -12 | 0   | -0.11 | 0.22 |
| 1  | -11 | -4  | 18.14 | 1.07 |
| -1 | -11 | -4  | 17.90 | 1.05 |
| -1 | -11 | 4   | 15.39 | 0.97 |
| 1  | -11 | 4   | 19.63 | 1.04 |
| 3  | -1  | -8  | 7.17  | 0.68 |
| -3 | -1  | -8  | 6.65  | 0.44 |
| -3 | -1  | 8   | 5.96  | 0.48 |
| 3  | -1  | 8   | 7.00  | 0.65 |
| -1 | 0   | 10  | 0.05  | 0.13 |
| 1  | 0   | 10  | 0.05  | 0.21 |
| 3  | -9  | -3  | 20.06 | 1.12 |
| -3 | -9  | 3   | 19.38 | 1.14 |
| -1 | 0   | -10 | 0.10  | 0.18 |
| 1  | 0   | -10 | -0.24 | 0.21 |
| -3 | -9  | -3  | 21.07 | 1.15 |
| 3  | -9  | 3   | 20.65 | 1.14 |
| -2 | -3  | 9   | 0.20  | 0.16 |
| -2 | -3  | -9  | -0.10 | 0.26 |
| 2  | -3  | 9   | 0.10  | 0.22 |
| 2  | -3  | -9  | -0.07 | 0.14 |
| -4 | -7  | -1  | 0.00  | 0.28 |
| -4 | -7  | 1   | -0.46 | 0.34 |
| 4  | -7  | -1  | 0.00  | 0.21 |
| 4  | -7  | 1   | 0.00  | 0.23 |
| 1  | -12 | 1   | 0.29  | 0.24 |
| -1 | -12 | 1   | 0.17  | 0.17 |
| 1  | -12 | -1  | -0.06 | 0.19 |
| -1 | -12 | -1  | 0.06  | 0.15 |
| 0  | -9  | -7  | -0.25 | 0.25 |
| 0  | -9  | 7   | -0.20 | 0.22 |
| 1  | -1  | 10  | 4.06  | 0.37 |
| -1 | -1  | 10  | 4.04  | 0.34 |
| -1 | -1  | -10 | 4.02  | 0.34 |
| 1  | -1  | -10 | 3.91  | 0.37 |
| 2  | -11 | -2  | -0.16 | 0.21 |
| -2 | -11 | -2  | 0.17  | 0.22 |
| 0  | -10 | -6  | 0.15  | 0.19 |
| 0  | -10 | 6   | 0.10  | 0.26 |
| -2 | -11 | 2   | 0.23  | 0.18 |
| 2  | -11 | 2   | 0.06  | 0.25 |
| 3  | -5  | 7   | 0.15  | 0.26 |
| -3 | -5  | -7  | 0.05  | 0.18 |
| -3 | -5  | 7   | 0.08  | 0.16 |
| 3  | -5  | -7  | 0.20  | 0.12 |
| 0  | -6  | 9   | 28.85 | 1.26 |
| 0  | -6  | -9  | 27.47 | 1.28 |
| -4 | 0   | -6  | 1.17  | 0.24 |
| -4 | 0   | 6   | 1.12  | 0.24 |
| 4  | 0   | -6  | 1.13  | 0.23 |
| 4  | 0   | 6   | 1.20  | 0.22 |
| 4  | -4  | 5   | 2.96  | 0.33 |
| -4 | -4  | 5   | 3.64  | 0.38 |
| 4  | -4  | -5  | 3.28  | 0.37 |

|    |     |     |       |      |
|----|-----|-----|-------|------|
| -4 | -4  | -5  | 3.57  | 0.36 |
| -3 | -2  | -8  | -0.34 | 0.36 |
| 3  | -2  | 8   | 0.19  | 0.19 |
| -3 | -2  | 8   | 0.05  | 0.22 |
| 3  | -2  | -8  | -0.29 | 0.27 |
| 0  | -3  | 10  | -0.26 | 0.15 |
| 0  | -3  | -10 | -0.05 | 0.23 |
| -2 | -6  | -8  | 0.63  | 0.20 |
| -2 | -6  | 8   | 0.15  | 0.29 |
| 2  | -6  | 8   | 0.40  | 0.31 |
| 2  | -6  | -8  | 0.86  | 0.22 |
| -4 | -1  | 6   | -0.05 | 0.17 |
| 4  | -1  | -6  | -0.05 | 0.21 |
| -4 | -1  | -6  | 0.15  | 0.19 |
| 4  | -1  | 6   | -0.20 | 0.26 |
| 1  | -2  | 10  | 0.22  | 0.11 |
| -1 | -2  | -10 | -0.25 | 0.21 |
| -1 | -2  | 10  | -0.29 | 0.27 |
| 1  | -2  | -10 | -0.25 | 0.25 |
| 4  | -7  | 2   | 0.15  | 0.15 |
| -4 | -7  | 2   | 0.44  | 0.15 |
| 4  | -7  | -2  | -0.15 | 0.31 |
| -4 | -7  | -2  | -0.18 | 0.27 |
| 1  | -12 | -2  | 0.11  | 0.16 |
| -1 | -12 | -2  | -0.06 | 0.19 |
| 1  | -12 | 2   | -0.41 | 0.28 |
| -1 | -12 | 2   | -0.29 | 0.26 |
| 0  | -8  | 8   | 0.05  | 0.25 |
| 0  | -8  | -8  | 0.20  | 0.24 |
| 3  | -10 | 0   | 0.00  | 0.26 |
| -3 | -10 | 0   | 0.17  | 0.17 |
| 0  | -12 | -3  | 10.43 | 0.87 |
| 0  | -12 | 3   | 10.29 | 0.93 |
| 3  | -8  | 5   | -0.25 | 0.31 |
| -3 | -8  | 5   | -0.31 | 0.26 |
| 3  | -8  | -5  | 0.15  | 0.15 |
| 0  | -11 | 5   | -0.05 | 0.25 |
| 0  | -11 | -5  | 0.26  | 0.25 |
| -3 | -8  | -5  | -0.08 | 0.15 |
| -4 | -2  | 6   | -0.16 | 0.23 |
| 4  | -2  | 6   | 0.40  | 0.19 |
| -4 | -2  | -6  | 0.20  | 0.27 |
| 4  | -2  | -6  | 0.00  | 0.25 |
| 3  | -7  | 6   | 9.90  | 0.79 |
| -3 | -7  | -6  | 10.14 | 0.82 |
| 3  | -7  | -6  | 9.80  | 0.79 |
| -3 | -7  | 6   | 9.18  | 0.76 |
| 5  | 0   | 0   | 0.18  | 0.28 |
| -5 | 0   | 0   | 0.00  | 0.21 |
| -1 | -9  | 7   | 5.67  | 0.42 |
| 1  | -9  | -7  | 6.16  | 0.41 |
| 1  | -9  | 7   | 5.76  | 0.42 |
| -1 | -9  | -7  | 4.85  | 0.41 |
| 3  | -10 | -1  | 0.25  | 0.19 |
| 2  | -9  | 6   | 0.21  | 0.15 |
| -3 | -10 | 1   | 0.00  | 0.25 |
| -3 | -10 | -1  | -0.06 | 0.19 |
| 3  | -10 | 1   | 0.31  | 0.30 |

|    |     |     |       |      |
|----|-----|-----|-------|------|
| -2 | -9  | 6   | 0.10  | 0.20 |
| 2  | -9  | -6  | -0.05 | 0.24 |
| -2 | -9  | -6  | 0.29  | 0.14 |
| 1  | -10 | 6   | -0.10 | 0.21 |
| -2 | -4  | 9   | 2.09  | 0.28 |
| -3 | -3  | 8   | 53.91 | 1.74 |
| -1 | -10 | 6   | 0.16  | 0.20 |
| -3 | -3  | -8  | 48.62 | 1.70 |
| 2  | -4  | -9  | 1.30  | 0.28 |
| 3  | -3  | 8   | 51.92 | 1.72 |
| -1 | -10 | -6  | -0.37 | 0.25 |
| 2  | -4  | 9   | 1.66  | 0.25 |
| -2 | -4  | -9  | 1.56  | 0.26 |
| 1  | -10 | -6  | 0.00  | 0.18 |
| 3  | -3  | -8  | 54.44 | 1.84 |
| 5  | -1  | 0   | -0.12 | 0.35 |
| -5 | -1  | 0   | 0.18  | 0.24 |
| -2 | -11 | 3   | -0.12 | 0.27 |
| 2  | -11 | -3  | 0.16  | 0.21 |
| -2 | -11 | -3  | 0.18  | 0.18 |
| 2  | -11 | 3   | 0.05  | 0.15 |
| 1  | -6  | -9  | 0.20  | 0.24 |
| -1 | -6  | 9   | 0.20  | 0.13 |
| -1 | -6  | -9  | -0.30 | 0.28 |
| 1  | -6  | 9   | 0.05  | 0.14 |
| -5 | 0   | 1   | 0.25  | 0.16 |
| -5 | 0   | -1  | -0.13 | 0.30 |
| 5  | 0   | 1   | -0.64 | 0.36 |
| 5  | 0   | -1  | 0.06  | 0.31 |
| -1 | -3  | -10 | 24.70 | 1.18 |
| -1 | -3  | 10  | 24.23 | 1.19 |
| 1  | -3  | -10 | 22.83 | 1.16 |
| 1  | -3  | 10  | 25.00 | 1.20 |
| 2  | -8  | -7  | 0.20  | 0.20 |
| 2  | -8  | 7   | -0.15 | 0.24 |
| -2 | -8  | -7  | -0.05 | 0.17 |
| -2 | -8  | 7   | 0.05  | 0.23 |
| 4  | -6  | 4   | 0.15  | 0.15 |
| 4  | -6  | -4  | -0.20 | 0.28 |
| -4 | -6  | -4  | -0.34 | 0.24 |
| -4 | -6  | 4   | -0.05 | 0.26 |
| 5  | -1  | -1  | 14.54 | 0.98 |
| -5 | -1  | -1  | 14.75 | 1.02 |
| -5 | -1  | 1   | 15.95 | 1.06 |
| 5  | -1  | 1   | 15.09 | 1.07 |
| 0  | -4  | -10 | 0.40  | 0.35 |
| 0  | -4  | 10  | 0.92  | 0.19 |
| -3 | -9  | -4  | 3.34  | 0.39 |
| -3 | -9  | 4   | 3.75  | 0.40 |
| 3  | -9  | -4  | 4.12  | 0.36 |
| 3  | -9  | 4   | 3.80  | 0.38 |
| -2 | -10 | -5  | 5.60  | 0.43 |
| 2  | -10 | 5   | 5.65  | 0.45 |
| -2 | -10 | 5   | 6.34  | 0.63 |
| 2  | -10 | -5  | 5.99  | 0.44 |
| -5 | -2  | 0   | 0.25  | 0.25 |
| 5  | -2  | 0   | -0.24 | 0.22 |
| 4  | -3  | -6  | -0.05 | 0.21 |

|    |     |     |       |      |
|----|-----|-----|-------|------|
| -4 | -3  | 6   | -0.11 | 0.21 |
| 4  | -3  | 6   | -0.20 | 0.26 |
| -4 | -3  | -6  | 0.15  | 0.24 |
| -4 | -5  | -5  | 0.16  | 0.21 |
| 4  | -5  | -5  | 0.00  | 0.17 |
| 4  | -5  | 5   | -0.05 | 0.27 |
| -4 | -5  | 5   | -0.05 | 0.12 |
| -3 | -10 | -2  | 0.09  | 0.15 |
| 3  | -10 | -2  | -0.21 | 0.20 |
| 3  | -10 | 2   | 0.00  | 0.28 |
| -3 | -10 | 2   | -0.24 | 0.27 |
| 1  | -8  | -8  | -0.05 | 0.17 |
| -1 | -8  | -8  | -0.31 | 0.28 |
| -1 | -8  | 8   | 0.00  | 0.22 |
| 1  | -8  | 8   | 0.05  | 0.19 |
| 4  | -7  | 3   | -0.05 | 0.25 |
| -4 | -7  | -3  | -0.66 | 0.33 |
| -4 | -7  | 3   | -0.40 | 0.28 |
| 4  | -7  | -3  | -0.36 | 0.24 |
| -1 | -12 | -3  | 0.00  | 0.25 |
| 1  | -12 | 3   | -0.12 | 0.23 |
| 1  | -12 | -3  | 0.36  | 0.14 |
| -1 | -12 | 3   | 0.38  | 0.18 |
| 1  | -11 | 5   | 7.43  | 0.69 |
| -1 | -11 | -5  | 6.26  | 0.50 |
| -1 | -11 | 5   | 6.83  | 0.67 |
| 1  | -11 | -5  | 6.72  | 0.62 |
| 5  | -2  | -1  | 0.16  | 0.29 |
| -5 | -2  | 1   | -0.36 | 0.32 |
| 5  | -2  | 1   | 0.07  | 0.33 |
| -5 | -2  | -1  | -0.13 | 0.33 |
| 3  | -6  | -7  | -0.20 | 0.26 |
| -3 | -6  | -7  | -0.05 | 0.31 |
| 3  | -6  | 7   | 0.05  | 0.19 |
| -3 | -6  | 7   | -0.05 | 0.25 |
| 5  | 0   | -2  | -0.17 | 0.25 |
| -5 | 0   | 2   | -0.11 | 0.22 |
| 5  | 0   | 2   | -0.42 | 0.29 |
| -5 | 0   | -2  | -0.78 | 0.36 |
| -5 | -1  | 2   | 3.59  | 0.38 |
| 5  | -1  | -2  | 3.55  | 0.38 |
| -5 | -1  | -2  | 3.23  | 0.38 |
| 5  | -1  | 2   | 4.52  | 0.39 |
| -4 | -8  | 0   | 15.93 | 1.07 |
| 4  | -8  | 0   | 18.28 | 1.13 |
| -3 | -4  | -8  | 0.05  | 0.29 |
| 3  | -4  | -8  | 0.16  | 0.16 |
| -3 | -4  | 8   | -0.21 | 0.29 |
| 3  | -4  | 8   | 0.10  | 0.29 |
| 0  | -7  | -9  | 0.21  | 0.16 |
| 0  | -7  | 9   | 0.05  | 0.19 |
| -4 | -8  | 1   | 0.46  | 0.24 |
| 4  | -8  | 1   | 0.53  | 0.25 |
| -4 | -8  | -1  | 0.78  | 0.23 |
| 4  | -8  | -1  | 0.37  | 0.23 |
| 2  | -7  | -8  | 0.00  | 0.28 |
| 1  | -4  | -10 | -0.16 | 0.29 |
| -2 | -7  | -8  | -0.26 | 0.23 |

|    |     |     |       |      |
|----|-----|-----|-------|------|
| -1 | -4  | 10  | 0.16  | 0.24 |
| -1 | -4  | -10 | 0.05  | 0.26 |
| -2 | -7  | 8   | 0.11  | 0.15 |
| 1  | -4  | 10  | 0.10  | 0.26 |
| 2  | -7  | 8   | -0.48 | 0.28 |
| 0  | -12 | 4   | 16.33 | 1.07 |
| 0  | -12 | -4  | 17.70 | 1.15 |
| 5  | -3  | 0   | 0.06  | 0.15 |
| -5 | -3  | 0   | 0.37  | 0.15 |
| 2  | -5  | -9  | -0.41 | 0.35 |
| -2 | -5  | 9   | 0.00  | 0.22 |
| 2  | -5  | 9   | 0.21  | 0.15 |
| -2 | -5  | -9  | 0.15  | 0.27 |
| 5  | -2  | -2  | -0.22 | 0.31 |
| -5 | -2  | 2   | 0.06  | 0.15 |
| 5  | -2  | 2   | -0.64 | 0.36 |
| -5 | -2  | -2  | -0.06 | 0.21 |
| 5  | -3  | -1  | 6.97  | 0.54 |
| 5  | -3  | 1   | 6.85  | 0.54 |
| -5 | -3  | -1  | 6.89  | 0.52 |
| -5 | -3  | 1   | 8.80  | 0.85 |
| 0  | -13 | 0   | -0.12 | 0.24 |
| 4  | -4  | -6  | 4.99  | 0.41 |
| -4 | -4  | 6   | 3.71  | 0.39 |
| 2  | -12 | 0   | 17.33 | 1.17 |
| 4  | -4  | 6   | 4.29  | 0.37 |
| -4 | -4  | -6  | 3.71  | 0.40 |
| -2 | -12 | 0   | 16.93 | 1.09 |
| -2 | -11 | -4  | -0.24 | 0.26 |
| 2  | -11 | -4  | 0.22  | 0.22 |
| 2  | -11 | 4   | -0.06 | 0.19 |
| -2 | -11 | 4   | 0.00  | 0.20 |
| 0  | -5  | 10  | -0.47 | 0.24 |
| 0  | -5  | -10 | -0.21 | 0.29 |
| 2  | 0   | 10  | -0.26 | 0.29 |
| -2 | 0   | -10 | 0.26  | 0.25 |
| 2  | 0   | -10 | 0.10  | 0.19 |
| -3 | -10 | -3  | -0.18 | 0.32 |
| -2 | 0   | 10  | 0.31  | 0.22 |
| 3  | -10 | -3  | -0.54 | 0.30 |
| 3  | -10 | 3   | 0.17  | 0.22 |
| -3 | -10 | 3   | 0.24  | 0.17 |
| 0  | -13 | -1  | 0.19  | 0.24 |
| 0  | -13 | 1   | -0.12 | 0.28 |
| -2 | -12 | 1   | 1.14  | 0.26 |
| -2 | -12 | -1  | 0.55  | 0.44 |
| 2  | -12 | -1  | 0.87  | 0.34 |
| 2  | -12 | 1   | 0.99  | 0.26 |
| 0  | -10 | 7   | 7.21  | 0.66 |
| 2  | -1  | -10 | -0.21 | 0.27 |
| 2  | -1  | 10  | 0.00  | 0.22 |
| -2 | -1  | 10  | 0.00  | 0.13 |
| -2 | -1  | -10 | 0.21  | 0.16 |
| 0  | -10 | -7  | 7.11  | 0.66 |
| -4 | -8  | 2   | 24.60 | 1.40 |
| 4  | -8  | 2   | 25.10 | 1.34 |
| 4  | -8  | -2  | 27.48 | 1.33 |
| -4 | -8  | -2  | 23.30 | 1.38 |

|    |     |     |       |      |
|----|-----|-----|-------|------|
| -5 | 0   | 3   | -0.17 | 0.25 |
| 5  | 0   | 3   | -0.23 | 0.29 |
| -5 | 0   | -3  | 0.00  | 0.31 |
| 5  | 0   | -3  | -0.22 | 0.25 |
| -4 | 0   | -7  | 0.21  | 0.17 |
| -4 | 0   | 7   | 0.05  | 0.23 |
| 4  | 0   | -7  | 0.24  | 0.16 |
| 4  | 0   | 7   | -0.11 | 0.25 |
| 5  | -1  | 3   | 8.45  | 0.75 |
| -5 | -1  | -3  | 7.90  | 0.79 |
| -5 | -1  | 3   | 9.40  | 0.80 |
| 5  | -1  | -3  | 8.80  | 0.84 |
| 1  | -7  | 9   | 1.25  | 0.25 |
| 1  | -7  | -9  | 1.16  | 0.24 |
| -1 | -7  | -9  | 1.91  | 0.25 |
| -1 | -7  | 9   | 1.22  | 0.25 |
| 3  | -8  | -6  | 0.05  | 0.19 |
| 5  | -3  | -2  | -0.22 | 0.28 |
| -3 | -8  | 6   | 0.17  | 0.14 |
| -5 | -3  | -2  | 0.16  | 0.15 |
| 3  | -8  | 6   | -0.49 | 0.28 |
| -5 | -3  | 2   | -0.06 | 0.24 |
| -3 | -8  | -6  | 0.11  | 0.25 |
| 5  | -3  | 2   | 0.23  | 0.23 |
| 0  | -11 | 6   | 0.11  | 0.15 |
| -4 | -1  | 7   | -0.11 | 0.25 |
| -4 | -1  | -7  | -0.59 | 0.30 |
| 4  | -1  | 7   | -0.22 | 0.33 |
| 0  | -11 | -6  | 0.00  | 0.19 |
| 4  | -1  | -7  | 0.16  | 0.25 |
| -4 | -6  | -5  | 22.99 | 1.22 |
| 4  | -7  | -4  | 0.00  | 0.18 |
| 4  | -6  | 5   | 25.31 | 1.21 |
| 4  | -6  | -5  | 23.31 | 1.29 |
| -4 | -6  | 5   | 24.16 | 1.24 |
| 4  | -7  | 4   | 0.16  | 0.25 |
| -4 | -7  | -4  | 0.21  | 0.15 |
| -4 | -7  | 4   | -0.12 | 0.30 |
| -1 | -12 | -4  | 0.18  | 0.23 |
| 1  | -12 | 4   | 0.00  | 0.14 |
| 1  | -12 | -4  | 0.23  | 0.27 |
| -1 | -12 | 4   | -0.23 | 0.26 |
| 0  | -9  | -8  | 0.16  | 0.21 |
| 0  | -9  | 8   | 0.00  | 0.13 |
| 2  | -2  | 10  | 1.77  | 0.31 |
| 2  | -2  | -10 | 1.89  | 0.31 |
| -2 | -2  | -10 | 1.81  | 0.33 |
| -2 | -2  | 10  | 1.77  | 0.28 |
| -3 | 0   | 9   | -0.16 | 0.21 |
| 5  | -4  | 0   | 0.00  | 0.25 |
| -3 | 0   | -9  | 0.16  | 0.20 |
| 3  | -9  | 5   | 16.48 | 1.00 |
| -3 | -9  | -5  | 15.89 | 1.05 |
| -3 | -9  | 5   | 15.65 | 1.03 |
| 3  | 0   | 9   | -0.21 | 0.24 |
| -5 | -4  | 0   | 0.00  | 0.22 |
| 3  | 0   | -9  | 0.05  | 0.19 |
| 3  | -9  | -5  | 15.82 | 1.06 |

|    |     |     |       |      |
|----|-----|-----|-------|------|
| -3 | -5  | 8   | 12.71 | 0.90 |
| -3 | -5  | -8  | 12.56 | 0.85 |
| 3  | -5  | 8   | 11.42 | 0.85 |
| 3  | -5  | -8  | 10.94 | 0.92 |
| 0  | -13 | -2  | -0.13 | 0.33 |
| 0  | -13 | 2   | 0.06  | 0.17 |
| 0  | 0   | 11  | -0.21 | 0.24 |
| 0  | 0   | -11 | -0.38 | 0.32 |
| 3  | -1  | -9  | 1.75  | 0.28 |
| -5 | -2  | 3   | -0.28 | 0.25 |
| -5 | -2  | -3  | -0.06 | 0.29 |
| 5  | -2  | 3   | -0.06 | 0.30 |
| -3 | -1  | -9  | 1.77  | 0.24 |
| -3 | -1  | 9   | 2.30  | 0.33 |
| 2  | -12 | -2  | 18.57 | 1.24 |
| 5  | -2  | -3  | -0.06 | 0.27 |
| 3  | -1  | 9   | 2.09  | 0.33 |
| 2  | -12 | 2   | 19.69 | 1.20 |
| -2 | -12 | 2   | 17.11 | 1.18 |
| -2 | -12 | -2  | 19.67 | 1.18 |
| 1  | -13 | 0   | -0.13 | 0.26 |
| -1 | -13 | 0   | -0.24 | 0.27 |
| -5 | -4  | 1   | 0.57  | 0.17 |
| 5  | -4  | 1   | -0.07 | 0.29 |
| -5 | -4  | -1  | -0.26 | 0.24 |
| 5  | -4  | -1  | -0.34 | 0.31 |
| 0  | -1  | -11 | 0.05  | 0.23 |
| -1 | -5  | -10 | 17.58 | 1.08 |
| 1  | -5  | 10  | 15.59 | 1.03 |
| 1  | -5  | -10 | 16.53 | 1.05 |
| 0  | -1  | 11  | -0.05 | 0.25 |
| -1 | -5  | 10  | 18.75 | 1.11 |
| -4 | -2  | 7   | 23.94 | 1.21 |
| 4  | -2  | -7  | 21.87 | 1.25 |
| -4 | -2  | -7  | 19.84 | 1.14 |
| 4  | -2  | 7   | 21.82 | 1.21 |
| 1  | -13 | -1  | 8.99  | 0.84 |
| -1 | -13 | 1   | 8.58  | 0.58 |
| 1  | -13 | 1   | 10.56 | 0.91 |
| 3  | -7  | 7   | 0.16  | 0.23 |
| -3 | -7  | -7  | 0.05  | 0.28 |
| 3  | -7  | -7  | 0.18  | 0.13 |
| -1 | -13 | -1  | 9.44  | 0.61 |
| -3 | -7  | 7   | 0.05  | 0.20 |
| -1 | -10 | 7   | 0.14  | 0.15 |
| 1  | -10 | -7  | 0.27  | 0.29 |
| -2 | -9  | 7   | -0.39 | 0.33 |
| 2  | -9  | 7   | -0.11 | 0.26 |
| 2  | -9  | -7  | -0.16 | 0.21 |
| 1  | -10 | 7   | -0.28 | 0.24 |
| -2 | -9  | -7  | 0.05  | 0.24 |
| -1 | -10 | -7  | 0.00  | 0.23 |
| 2  | -10 | 6   | 1.31  | 0.22 |
| -2 | -10 | -6  | 0.51  | 0.41 |
| -2 | -10 | 6   | 0.95  | 0.24 |
| 2  | -10 | -6  | 1.25  | 0.21 |
| -3 | -11 | 0   | 0.06  | 0.16 |
| 3  | -11 | 0   | 0.37  | 0.16 |

|    |     |     |       |      |
|----|-----|-----|-------|------|
| -3 | -2  | -9  | 0.27  | 0.26 |
| 3  | -2  | -9  | 0.32  | 0.26 |
| -3 | -2  | 9   | -0.55 | 0.34 |
| 3  | -2  | 9   | -0.16 | 0.27 |
| -4 | -8  | -3  | 0.56  | 0.29 |
| -4 | -5  | 6   | 0.17  | 0.22 |
| 4  | -5  | -6  | -0.17 | 0.28 |
| 4  | -8  | 3   | 0.64  | 0.24 |
| 4  | -5  | 6   | -0.16 | 0.21 |
| -4 | -8  | 3   | 0.64  | 0.24 |
| -4 | -5  | -6  | 0.00  | 0.24 |
| 4  | -8  | -3  | 0.80  | 0.22 |
| -2 | -6  | -9  | 22.81 | 1.22 |
| -2 | -6  | 9   | 25.18 | 1.29 |
| 2  | -6  | 9   | 26.34 | 1.32 |
| 2  | -6  | -9  | 24.28 | 1.31 |
| 0  | -2  | -11 | 15.88 | 1.02 |
| -2 | -3  | -10 | 0.00  | 0.23 |
| 0  | -2  | 11  | 16.79 | 1.02 |
| 2  | -3  | 10  | -0.06 | 0.18 |
| 2  | -3  | -10 | 0.11  | 0.15 |
| -2 | -3  | 10  | -0.11 | 0.22 |
| 1  | -11 | -6  | 8.97  | 0.80 |
| 3  | -11 | -1  | 14.91 | 1.03 |
| 3  | -11 | 1   | 16.68 | 1.20 |
| 1  | -11 | 6   | 8.62  | 0.74 |
| -1 | -11 | -6  | 9.12  | 0.76 |
| -1 | -11 | 6   | 8.02  | 0.57 |
| -3 | -11 | 1   | 14.52 | 1.07 |
| -3 | -11 | -1  | 16.25 | 1.06 |
| -1 | -9  | -8  | 2.20  | 0.30 |
| -1 | -9  | 8   | 2.29  | 0.31 |
| 1  | -9  | -8  | 2.85  | 0.30 |
| 1  | -9  | 8   | 2.92  | 0.32 |
| -5 | -4  | 2   | -0.18 | 0.28 |
| 5  | -4  | -2  | -0.66 | 0.33 |
| 5  | -4  | 2   | 0.34  | 0.12 |
| -5 | -4  | -2  | -0.19 | 0.34 |
| 3  | -10 | -4  | 0.11  | 0.16 |
| -3 | -10 | 4   | -0.06 | 0.33 |
| -5 | -3  | -3  | 9.09  | 0.83 |
| 3  | -10 | 4   | 0.28  | 0.23 |
| -3 | -10 | -4  | -0.19 | 0.24 |
| -5 | -3  | 3   | 10.17 | 0.83 |
| 5  | -3  | 3   | 9.29  | 0.79 |
| 5  | -3  | -3  | 10.93 | 0.88 |
| 0  | -12 | -5  | 5.23  | 0.43 |
| 0  | -12 | 5   | 5.76  | 0.44 |
| 0  | -6  | 10  | 0.49  | 0.20 |
| 0  | -6  | -10 | 0.27  | 0.29 |
| -4 | -3  | 7   | 0.05  | 0.28 |
| -1 | -13 | 2   | 0.32  | 0.26 |
| 4  | -3  | -7  | -0.17 | 0.31 |
| -1 | -13 | -2  | 0.25  | 0.16 |
| 1  | -13 | -2  | -0.25 | 0.32 |
| 0  | -8  | -9  | 0.16  | 0.16 |
| -4 | -3  | -7  | 0.22  | 0.14 |
| 0  | -8  | 9   | 0.38  | 0.12 |



|    |     |     |       |      |
|----|-----|-----|-------|------|
| 1  | -13 | 2   | 0.26  | 0.26 |
| 4  | -3  | 7   | -0.38 | 0.26 |
| -5 | 0   | -4  | 0.09  | 0.13 |
| 5  | 0   | 4   | 0.06  | 0.25 |
| 5  | 0   | -4  | 0.06  | 0.25 |
| -5 | 0   | 4   | 0.17  | 0.22 |
| -1 | 0   | -11 | -0.16 | 0.25 |
| 1  | 0   | 11  | -0.22 | 0.28 |
| -1 | 0   | 11  | 0.00  | 0.23 |
| 1  | 0   | -11 | 0.22  | 0.12 |
| -2 | -8  | 8   | -0.03 | 0.18 |
| -2 | -8  | -8  | -0.06 | 0.18 |
| 2  | -8  | -8  | 0.11  | 0.15 |
| 2  | -8  | 8   | 0.06  | 0.20 |
| 0  | -13 | -3  | 0.31  | 0.34 |
| 0  | -13 | 3   | -0.19 | 0.24 |
| -4 | -9  | 0   | -0.18 | 0.28 |
| 4  | -9  | 0   | 0.06  | 0.19 |
| 5  | -1  | -4  | 1.33  | 0.28 |
| 5  | -1  | 4   | 1.43  | 0.25 |
| -1 | -1  | -11 | -0.06 | 0.26 |
| 2  | -12 | -3  | 5.95  | 0.45 |
| -2 | -12 | 3   | 4.92  | 0.47 |
| -1 | -1  | 11  | 0.21  | 0.18 |
| 2  | -12 | 3   | 5.70  | 0.46 |
| -5 | -1  | 4   | 1.17  | 0.30 |
| -2 | -12 | -3  | 4.54  | 0.46 |
| 1  | -1  | 11  | 0.27  | 0.23 |
| 1  | -1  | -11 | -0.44 | 0.32 |
| -5 | -1  | -4  | 1.61  | 0.26 |
| 2  | -11 | 5   | -0.29 | 0.29 |
| 2  | -11 | -5  | 0.25  | 0.14 |
| -2 | -11 | 5   | 0.26  | 0.15 |
| -2 | -11 | -5  | -0.18 | 0.27 |
| -3 | -3  | 9   | 0.16  | 0.25 |
| 3  | -3  | 9   | -0.27 | 0.27 |
| -3 | -3  | -9  | -0.55 | 0.36 |
| 3  | -3  | -9  | -0.17 | 0.29 |
| -5 | -5  | 0   | -0.57 | 0.33 |
| 5  | -5  | 0   | 0.18  | 0.18 |
| 3  | -11 | -2  | 4.29  | 0.45 |
| -4 | -9  | -1  | 0.22  | 0.21 |
| -3 | -11 | 2   | 3.87  | 0.43 |
| 4  | -9  | -1  | 0.11  | 0.21 |
| 3  | -11 | 2   | 4.44  | 0.42 |
| -4 | -9  | 1   | 0.26  | 0.25 |
| -3 | -11 | -2  | 3.99  | 0.45 |
| 4  | -9  | 1   | 0.27  | 0.27 |
| 0  | -3  | 11  | 0.10  | 0.33 |
| 0  | -3  | -11 | 0.05  | 0.27 |
| 5  | -5  | 1   | 11.47 | 1.01 |
| -5 | -5  | 1   | 11.94 | 0.94 |
| -5 | -5  | -1  | 10.08 | 0.94 |
| 5  | -5  | -1  | 12.90 | 0.94 |
| -5 | -2  | 4   | 0.00  | 0.14 |
| 5  | -2  | -4  | 0.06  | 0.28 |
| 1  | -2  | 11  | 0.00  | 0.23 |
| -1 | -2  | 11  | 0.38  | 0.12 |

|    |     |     |       |      |
|----|-----|-----|-------|------|
| 5  | -2  | 4   | -0.05 | 0.27 |
| -1 | -2  | -11 | -0.11 | 0.26 |
| -5 | -2  | -4  | 0.29  | 0.12 |
| 1  | -2  | -11 | 0.16  | 0.21 |
| -3 | -6  | 8   | 0.31  | 0.14 |
| -3 | -6  | -8  | -0.06 | 0.27 |
| 3  | -6  | -8  | -0.11 | 0.29 |
| 3  | -6  | 8   | 0.27  | 0.16 |
| 2  | -4  | 10  | 0.19  | 0.19 |
| 2  | -4  | -10 | 0.00  | 0.27 |
| -2 | -4  | -10 | 0.66  | 0.17 |
| -2 | -4  | 10  | 0.33  | 0.31 |
| -4 | -7  | -5  | -0.48 | 0.32 |
| 4  | -7  | -5  | 0.11  | 0.27 |
| -4 | -7  | 5   | -0.29 | 0.25 |
| 4  | -7  | 5   | -0.22 | 0.25 |
| 1  | -12 | 5   | 0.00  | 0.25 |
| 1  | -12 | -5  | -0.17 | 0.22 |
| -1 | -12 | -5  | -0.18 | 0.28 |
| -1 | -12 | 5   | -0.12 | 0.24 |
| 1  | -6  | -10 | 0.00  | 0.23 |
| -1 | -6  | -10 | 0.22  | 0.22 |
| 1  | -6  | 10  | 0.11  | 0.21 |
| -1 | -6  | 10  | 0.05  | 0.24 |
| -5 | -4  | 3   | 0.39  | 0.18 |
| -5 | -4  | -3  | 0.00  | 0.17 |
| 5  | -4  | -3  | 0.00  | 0.28 |
| 5  | -4  | 3   | 0.00  | 0.24 |
| -1 | -8  | -9  | -0.28 | 0.31 |
| 1  | -8  | 9   | 0.05  | 0.25 |
| -1 | -8  | 9   | -0.23 | 0.29 |
| 1  | -8  | -9  | -0.39 | 0.30 |
| -4 | -9  | 2   | -0.06 | 0.31 |
| -4 | -9  | -2  | -0.13 | 0.34 |
| 4  | -4  | -7  | 4.64  | 0.44 |
| 4  | -9  | -2  | 0.11  | 0.21 |
| -4 | -4  | -7  | 4.63  | 0.38 |
| 4  | -4  | 7   | 4.06  | 0.39 |
| 4  | -9  | 2   | 0.36  | 0.25 |
| -4 | -4  | 7   | 4.66  | 0.42 |
| 4  | -8  | 4   | 21.20 | 1.21 |
| -1 | -13 | 3   | 12.09 | 0.95 |
| -1 | -13 | -3  | 10.17 | 0.95 |
| 1  | -13 | 3   | 10.20 | 0.91 |
| 1  | -13 | -3  | 11.33 | 0.88 |
| 4  | -8  | -4  | 21.95 | 1.20 |
| -4 | -8  | 4   | 22.17 | 1.29 |
| -4 | -8  | -4  | 21.17 | 1.22 |
| 5  | -5  | -2  | 3.23  | 0.42 |
| 5  | -5  | 2   | 3.63  | 0.35 |
| -5 | -5  | -2  | 3.08  | 0.36 |
| -5 | -5  | 2   | 4.27  | 0.42 |
| -4 | -6  | 6   | -0.46 | 0.37 |
| 4  | -6  | -6  | -0.27 | 0.31 |
| -4 | -6  | -6  | 0.06  | 0.21 |
| 4  | -6  | 6   | 0.00  | 0.30 |
| -3 | -9  | 6   | 1.72  | 0.30 |
| -3 | -9  | -6  | 1.65  | 0.35 |

|    |     |     |       |      |
|----|-----|-----|-------|------|
| 3  | -9  | -6  | 1.78  | 0.30 |
| 3  | -9  | 6   | 2.08  | 0.29 |
| -3 | -4  | 9   | 0.12  | 0.25 |
| 3  | -4  | -9  | 0.34  | 0.15 |
| 3  | -4  | 9   | 0.00  | 0.27 |
| -3 | -4  | -9  | 0.28  | 0.27 |
| 5  | -3  | -4  | 5.20  | 0.47 |
| -5 | -3  | -4  | 4.38  | 0.41 |
| 1  | -3  | -11 | 2.84  | 0.32 |
| 1  | -3  | 11  | 2.56  | 0.33 |
| -1 | -3  | 11  | 2.61  | 0.31 |
| -1 | -3  | -11 | 2.29  | 0.31 |
| -5 | -3  | 4   | 4.45  | 0.45 |
| 5  | -3  | 4   | 4.60  | 0.45 |
| -3 | -11 | -3  | 4.85  | 0.48 |
| 3  | -11 | 3   | 5.90  | 0.49 |
| 0  | -4  | 11  | 0.11  | 0.28 |
| 0  | -4  | -11 | -0.06 | 0.38 |
| -3 | -11 | 3   | 5.01  | 0.49 |
| 3  | -11 | -3  | 6.70  | 0.48 |
| -2 | -7  | 9   | 0.29  | 0.18 |
| -2 | -7  | -9  | 0.23  | 0.18 |
| 2  | -7  | 9   | 0.26  | 0.13 |
| 2  | -7  | -9  | -0.22 | 0.21 |
| 0  | -11 | -7  | -0.29 | 0.25 |
| -3 | -8  | 7   | -0.12 | 0.23 |
| -3 | -8  | -7  | 0.29  | 0.24 |
| 3  | -8  | -7  | -0.11 | 0.26 |
| 0  | -11 | 7   | 0.00  | 0.20 |
| 3  | -8  | 7   | -0.20 | 0.18 |
| 0  | -13 | -4  | 0.00  | 0.30 |
| 0  | -13 | 4   | 0.18  | 0.24 |
| 2  | -12 | 4   | 13.64 | 1.04 |
| -2 | -12 | -4  | 12.99 | 0.96 |
| -2 | -12 | 4   | 13.71 | 1.07 |
| 2  | -12 | -4  | 14.54 | 0.97 |
| 0  | -10 | 8   | 0.40  | 0.13 |
| 0  | -10 | -8  | -0.06 | 0.37 |
| -3 | -10 | -5  | 0.19  | 0.19 |
| -3 | -10 | 5   | 0.18  | 0.23 |
| 3  | -10 | 5   | 0.24  | 0.27 |
| 3  | -10 | -5  | 0.26  | 0.18 |
| 0  | -7  | 10  | 0.00  | 0.24 |
| 0  | -7  | -10 | -0.17 | 0.22 |
| -4 | 0   | -8  | 0.51  | 0.19 |
| 4  | 0   | -8  | 0.18  | 0.27 |
| -4 | 0   | 8   | 0.06  | 0.25 |
| 4  | 0   | 8   | 0.34  | 0.24 |
| 5  | -6  | 0   | -0.06 | 0.19 |
| -5 | -6  | 0   | -0.26 | 0.29 |
| -5 | 0   | -5  | 0.17  | 0.17 |
| 2  | -13 | 0   | -0.69 | 0.35 |
| -5 | 0   | 5   | 0.23  | 0.18 |
| 5  | 0   | -5  | -0.23 | 0.26 |
| 5  | 0   | 5   | 0.06  | 0.21 |
| -2 | -13 | 0   | -0.25 | 0.32 |
| 4  | -1  | -8  | -0.52 | 0.30 |
| -4 | -1  | -8  | -0.11 | 0.33 |

|    |     |     |       |      |
|----|-----|-----|-------|------|
| 4  | -1  | 8   | 0.11  | 0.25 |
| -4 | -1  | 8   | -0.06 | 0.27 |
| 2  | -5  | -10 | 0.23  | 0.22 |
| 2  | -5  | 10  | 0.11  | 0.25 |
| -2 | -5  | 10  | 0.23  | 0.23 |
| -2 | -5  | -10 | 0.00  | 0.28 |
| -4 | -9  | 3   | 0.26  | 0.26 |
| -4 | -9  | -3  | -0.26 | 0.29 |
| 4  | -9  | 3   | -0.12 | 0.19 |
| 4  | -9  | -3  | 0.11  | 0.16 |
| -5 | -1  | -5  | 1.31  | 0.24 |
| -5 | -1  | 5   | 1.03  | 0.29 |
| 5  | -1  | 5   | 1.48  | 0.24 |
| 5  | -1  | -5  | 1.57  | 0.30 |
| 5  | -6  | 1   | -0.20 | 0.31 |
| -5 | -6  | -1  | -0.27 | 0.25 |
| -5 | -6  | 1   | -0.20 | 0.26 |
| 5  | -6  | -1  | -0.06 | 0.28 |
| -2 | -13 | 1   | 0.07  | 0.17 |
| 2  | -13 | -1  | -0.07 | 0.33 |
| 2  | -13 | 1   | 0.00  | 0.17 |
| -2 | -13 | -1  | 0.07  | 0.28 |
| 0  | -14 | 0   | 0.13  | 0.18 |
| -5 | -5  | 3   | 8.91  | 0.79 |
| 5  | -5  | 3   | 6.04  | 0.49 |
| 2  | -10 | 7   | 5.76  | 0.50 |
| -2 | -10 | -7  | 5.32  | 0.46 |
| -2 | -10 | 7   | 5.59  | 0.47 |
| -5 | -5  | -3  | 7.57  | 0.57 |
| 0  | -12 | 6   | 8.15  | 0.56 |
| 0  | -12 | -6  | 9.18  | 0.85 |
| 2  | -10 | -7  | 5.75  | 0.48 |
| 5  | -5  | -3  | 7.18  | 0.61 |
| -4 | -5  | 7   | -0.06 | 0.28 |
| 4  | -5  | -7  | -0.06 | 0.27 |
| -4 | -5  | -7  | 0.32  | 0.16 |
| 4  | -5  | 7   | -0.34 | 0.28 |
| -1 | -4  | -11 | -0.17 | 0.32 |
| 5  | -4  | -4  | 0.23  | 0.27 |
| -5 | -4  | -4  | -0.31 | 0.27 |
| -5 | -4  | 4   | -0.54 | 0.35 |
| 1  | -4  | -11 | 0.11  | 0.16 |
| 1  | -4  | 11  | 0.06  | 0.24 |
| 5  | -4  | 4   | -0.11 | 0.27 |
| -1 | -4  | 11  | 0.31  | 0.14 |
| 0  | -14 | 1   | 0.65  | 0.20 |
| 0  | -14 | -1  | 0.14  | 0.34 |
| 4  | -2  | -8  | 0.18  | 0.39 |
| -4 | -2  | -8  | 0.49  | 0.23 |
| -4 | -2  | 8   | 0.00  | 0.25 |
| 4  | -2  | 8   | 0.46  | 0.32 |
| 0  | -9  | 9   | 0.17  | 0.17 |
| -1 | -11 | -7  | -0.06 | 0.28 |
| 1  | -11 | -7  | 0.06  | 0.21 |
| 1  | -11 | 7   | 0.00  | 0.29 |
| -1 | -11 | 7   | 0.18  | 0.23 |
| 0  | -9  | -9  | -0.06 | 0.19 |
| -5 | -2  | 5   | -0.36 | 0.29 |

|    |     |     |       |      |
|----|-----|-----|-------|------|
| 1  | -13 | 4   | 0.38  | 0.31 |
| -2 | -11 | 6   | 0.18  | 0.23 |
| 2  | -11 | -6  | -0.29 | 0.29 |
| -2 | -11 | -6  | -0.12 | 0.25 |
| 2  | -11 | 6   | -0.18 | 0.31 |
| -1 | -13 | -4  | 0.07  | 0.32 |
| -1 | -13 | 4   | 0.20  | 0.33 |
| 1  | -13 | -4  | 0.25  | 0.29 |
| -3 | -7  | -8  | 7.57  | 0.71 |
| -3 | -7  | 8   | 8.11  | 0.55 |
| 3  | -7  | 8   | 8.91  | 0.76 |
| 3  | -7  | -8  | 8.15  | 0.57 |
| -2 | -9  | 8   | 0.39  | 0.13 |
| 2  | -9  | 8   | -0.06 | 0.24 |
| 2  | -9  | -8  | -0.17 | 0.22 |
| -2 | -9  | -8  | -0.35 | 0.25 |
| -1 | -10 | -8  | 0.20  | 0.15 |
| -1 | -10 | 8   | -0.12 | 0.19 |
| 1  | -10 | -8  | 0.12  | 0.22 |
| 1  | -10 | 8   | -0.18 | 0.23 |
| 3  | -5  | -9  | -0.06 | 0.34 |
| -3 | -5  | -9  | 0.90  | 0.21 |
| -3 | -5  | 9   | 1.19  | 0.23 |
| 3  | -5  | 9   | 0.58  | 0.25 |
| 1  | -7  | -10 | 10.25 | 0.86 |
| -5 | -6  | 2   | -0.20 | 0.35 |
| 1  | -7  | 10  | 9.68  | 0.92 |
| -1 | -7  | 10  | 10.69 | 0.87 |
| -1 | -7  | -10 | 10.47 | 0.82 |
| -2 | -13 | -2  | -0.26 | 0.25 |
| 0  | -5  | -11 | -0.28 | 0.28 |
| 2  | -13 | 2   | -0.07 | 0.23 |
| 2  | -13 | -2  | -0.19 | 0.34 |
| -2 | -13 | 2   | 0.00  | 0.28 |
| 0  | -5  | 11  | -0.40 | 0.31 |
| 2  | 0   | -11 | 0.29  | 0.19 |
| 2  | 0   | 11  | 0.06  | 0.15 |
| -2 | 0   | 11  | -0.28 | 0.28 |
| -2 | 0   | -11 | 0.00  | 0.20 |
| 3  | -12 | 0   | -0.14 | 0.23 |
| -3 | -12 | 0   | -0.32 | 0.28 |
| 3  | -11 | -4  | 9.72  | 0.86 |
| 3  | -11 | 4   | 10.17 | 0.88 |
| -3 | -11 | 4   | 9.24  | 0.67 |
| -3 | -11 | -4  | 9.49  | 0.89 |
| 4  | -10 | 0   | 0.41  | 0.29 |
| 2  | -1  | 11  | 0.23  | 0.18 |
| -4 | -10 | 0   | 0.33  | 0.27 |
| -2 | -1  | 11  | -0.28 | 0.28 |
| -2 | -1  | -11 | 0.06  | 0.35 |
| 2  | -1  | -11 | 0.00  | 0.28 |
| -4 | -8  | 5   | -0.24 | 0.35 |
| 4  | -8  | 5   | -0.41 | 0.35 |
| -4 | -8  | -5  | -0.06 | 0.26 |
| 4  | -8  | -5  | 0.17  | 0.22 |
| -3 | 0   | 10  | -0.06 | 0.24 |
| -3 | 0   | -10 | 0.17  | 0.30 |
| 3  | 0   | 10  | 0.06  | 0.29 |

|    |     |     |       |      |
|----|-----|-----|-------|------|
| 3  | 0   | -10 | -0.17 | 0.27 |
| 0  | -14 | 2   | 2.11  | 0.39 |
| 0  | -14 | -2  | 2.07  | 0.34 |
| 4  | -7  | -6  | -0.22 | 0.32 |
| -4 | -7  | -6  | -0.12 | 0.25 |
| 4  | -7  | 6   | -0.11 | 0.31 |
| -4 | -7  | 6   | -0.06 | 0.29 |
| 3  | -12 | -1  | 0.17  | 0.20 |
| -1 | -12 | 6   | 0.06  | 0.16 |
| 1  | -12 | -6  | 0.12  | 0.27 |
| 3  | -12 | 1   | -0.14 | 0.33 |
| -1 | -14 | 0   | -0.06 | 0.31 |
| -3 | -12 | 1   | -0.20 | 0.30 |
| -3 | -12 | -1  | 0.26  | 0.20 |
| 1  | -14 | 0   | 0.21  | 0.26 |
| -1 | -12 | -6  | -0.25 | 0.28 |
| 1  | -12 | 6   | -0.24 | 0.27 |
| -4 | -10 | -1  | 2.65  | 0.37 |
| 3  | -1  | 10  | 2.44  | 0.36 |
| 4  | -10 | -1  | 2.07  | 0.34 |
| 3  | -1  | -10 | 2.84  | 0.37 |
| -3 | -1  | -10 | 3.29  | 0.39 |
| -4 | -10 | 1   | 0.81  | 0.36 |
| -3 | -1  | 10  | 3.09  | 0.38 |
| 4  | -10 | 1   | 2.88  | 0.40 |
| 4  | -3  | -8  | -0.17 | 0.26 |
| -4 | -3  | -8  | -0.18 | 0.27 |
| 4  | -3  | 8   | -0.40 | 0.31 |
| -4 | -3  | 8   | -0.17 | 0.34 |
| -5 | -3  | 5   | 5.15  | 0.45 |
| -1 | -14 | -1  | 0.34  | 0.28 |
| 1  | -14 | -1  | -0.34 | 0.25 |
| -1 | -14 | 1   | -0.92 | 0.38 |
| 1  | -14 | 1   | 0.07  | 0.25 |
| 2  | -2  | 11  | 22.63 | 1.31 |
| -2 | -2  | -11 | 17.89 | 1.14 |
| 2  | -2  | -11 | 18.59 | 1.25 |
| -2 | -2  | 11  | 20.28 | 1.20 |
| 1  | -9  | 9   | 0.89  | 0.24 |
| -1 | -9  | 9   | 0.65  | 0.24 |
| -1 | -9  | -9  | 0.41  | 0.33 |
| 1  | -9  | -9  | 0.61  | 0.22 |
| 0  | -13 | -5  | -0.06 | 0.26 |
| 0  | -13 | 5   | 0.12  | 0.23 |
| -4 | -9  | 4   | -0.06 | 0.31 |
| -2 | -12 | 5   | 3.35  | 0.37 |
| -2 | -12 | -5  | 2.95  | 0.36 |
| 2  | -12 | -5  | 3.96  | 0.41 |
| 2  | -12 | 5   | 2.98  | 0.37 |
| 3  | -2  | -10 | -0.35 | 0.25 |
| 3  | -2  | 10  | 0.37  | 0.14 |
| -3 | -2  | 10  | 0.18  | 0.27 |
| -3 | -2  | -10 | 0.32  | 0.12 |
| 2  | -6  | -10 | 0.29  | 0.31 |
| -2 | -6  | -10 | 0.88  | 0.23 |
| 2  | -6  | 10  | 0.47  | 0.41 |
| -2 | -6  | 10  | 0.42  | 0.36 |
| 1  | -5  | 11  | 0.46  | 0.17 |

|    |     |     |       |      |
|----|-----|-----|-------|------|
| -1 | -5  | 11  | 0.41  | 0.33 |
| -5 | -5  | 4   | 7.38  | 0.54 |
| 1  | -5  | -11 | 0.35  | 0.28 |
| -1 | -5  | -11 | 0.18  | 0.27 |
| -2 | -8  | 9   | 0.24  | 0.28 |
| -2 | -8  | -9  | -0.12 | 0.28 |
| 2  | -8  | -9  | 0.35  | 0.32 |
| 2  | -8  | 9   | 0.06  | 0.16 |
| 3  | -12 | -2  | -0.06 | 0.26 |
| -3 | -12 | -2  | 0.44  | 0.15 |
| -3 | -12 | 2   | 0.34  | 0.33 |
| 3  | -12 | 2   | -0.82 | 0.47 |
| -4 | -10 | 2   | -0.21 | 0.36 |
| -5 | -6  | 3   | -0.13 | 0.31 |
| -5 | -7  | 0   | 0.00  | 0.18 |
| 2  | -13 | 3   | 0.07  | 0.24 |
| -2 | -13 | 3   | -0.07 | 0.18 |
| -2 | -13 | -3  | -0.14 | 0.27 |
| 2  | -13 | -3  | 0.06  | 0.16 |
| 1  | -14 | -2  | -0.21 | 0.32 |
| -1 | -14 | -2  | -0.14 | 0.21 |
| -4 | -6  | 7   | 19.92 | 1.30 |
| -1 | -14 | 2   | 0.07  | 0.18 |
| 1  | -14 | 2   | 0.21  | 0.27 |
| 0  | 0   | 12  | 7.72  | 0.77 |
| 0  | 0   | -12 | 10.11 | 0.87 |
| -5 | -7  | 1   | 0.77  | 0.26 |
| 0  | -8  | -10 | 4.30  | 0.40 |
| 0  | -8  | 10  | 4.24  | 0.42 |
| -3 | -9  | 7   | 2.78  | 0.35 |
| 0  | -14 | -3  | 7.18  | 0.55 |
| 0  | -14 | 3   | 6.73  | 0.55 |
| -3 | -10 | 6   | -0.25 | 0.32 |
| 0  | -1  | -12 | -0.06 | 0.24 |
| 0  | -1  | 12  | -0.29 | 0.29 |
| -2 | -3  | 11  | -0.41 | 0.32 |
| -2 | -3  | -11 | -0.06 | 0.24 |
| 2  | -3  | -11 | 0.12  | 0.22 |
| 2  | -3  | 11  | -0.18 | 0.34 |
| -4 | -4  | 8   | 0.12  | 0.40 |
| -3 | -6  | 9   | -0.54 | 0.28 |
| -5 | 0   | 6   | 0.00  | 0.26 |
| -5 | -4  | 5   | 0.06  | 0.22 |
| -3 | -3  | 10  | 14.60 | 1.06 |
| 0  | -6  | 11  | 25.09 | 1.30 |
| 0  | -6  | -11 | 25.64 | 1.33 |
| -5 | -1  | 6   | 4.42  | 0.46 |
| -1 | -13 | -5  | 5.51  | 0.51 |
| 1  | -13 | -5  | 5.95  | 0.49 |
| -1 | -13 | 5   | 4.34  | 0.47 |
| 1  | -13 | 5   | 4.88  | 0.47 |
| 0  | -2  | -12 | 2.62  | 0.31 |
| 0  | -2  | 12  | 3.00  | 0.34 |
| -5 | -7  | 2   | 1.09  | 0.26 |
| -3 | -8  | 8   | 0.06  | 0.22 |
| 0  | -11 | 8   | 0.31  | 0.29 |
| 0  | -11 | -8  | 0.18  | 0.18 |
| -3 | -12 | 3   | -0.14 | 0.33 |

|    |     |    |       |      |
|----|-----|----|-------|------|
| -3 | -11 | 5  | 3.05  | 0.39 |
| -5 | -2  | 6  | -0.19 | 0.32 |
| -4 | -10 | 3  | 4.35  | 0.51 |
| -1 | 0   | 12 | -0.23 | 0.30 |
| 0  | -12 | 7  | 2.43  | 0.32 |
| -1 | -8  | 10 | -0.24 | 0.31 |
| -1 | -14 | 3  | -0.49 | 0.38 |
| -1 | -1  | 12 | 1.50  | 0.31 |
| -2 | -4  | 11 | -0.06 | 0.20 |
| -2 | -11 | 7  | 0.13  | 0.28 |
| 0  | -10 | 9  | 7.38  | 0.73 |
| -1 | -6  | 11 | 0.00  | 0.37 |
| -5 | -6  | 4  | -0.52 | 0.38 |
| -4 | -8  | 6  | 10.23 | 0.93 |
| 0  | -3  | 12 | 0.00  | 0.14 |
| -2 | -13 | 4  | -0.21 | 0.27 |
| -3 | -4  | 10 | -0.18 | 0.24 |
| -2 | -10 | 8  | 1.36  | 0.25 |
| -4 | 0   | 9  | 0.40  | 0.15 |
| -4 | -9  | 5  | 0.00  | 0.28 |
| -1 | -2  | 12 | 0.09  | 0.17 |
| -4 | -5  | 8  | -0.50 | 0.25 |
| -2 | -7  | 10 | -0.18 | 0.18 |
| 0  | -14 | 4  | 7.87  | 0.59 |
| -5 | -5  | 5  | 2.68  | 0.38 |
| -5 | -3  | 6  | 14.22 | 1.03 |
| -4 | -1  | 9  | 0.25  | 0.29 |
| -1 | -11 | 8  | 9.62  | 0.89 |
| -5 | -7  | 3  | 5.06  | 0.51 |
| 0  | -13 | 6  | -0.13 | 0.25 |
| -4 | -7  | 7  | 0.35  | 0.13 |
| -1 | -12 | 7  | 0.32  | 0.26 |
| -2 | -14 | 0  | 0.34  | 0.16 |
| -2 | -12 | 6  | 3.31  | 0.38 |
| -5 | -8  | 0  | -0.07 | 0.29 |
| -4 | -11 | 0  | -0.21 | 0.31 |
| -4 | -2  | 9  | 15.97 | 1.20 |
| -2 | -14 | 1  | 0.55  | 0.43 |
| -3 | -7  | 9  | 0.38  | 0.38 |
| -2 | -9  | 9  | -0.06 | 0.21 |
| -1 | -3  | 12 | 5.44  | 0.49 |
| -1 | -10 | 9  | 0.06  | 0.17 |
| -5 | -8  | 1  | -0.14 | 0.38 |
| -4 | -11 | 1  | 0.35  | 0.34 |
| 0  | -7  | 11 | 0.06  | 0.27 |
| -3 | -12 | 4  | -0.14 | 0.33 |
| 0  | -4  | 12 | 0.06  | 0.26 |
| -4 | -10 | 4  | 0.80  | 0.28 |
| 0  | -15 | 0  | 0.00  | 0.24 |
| -2 | -5  | 11 | 0.19  | 0.29 |
| -1 | -14 | 4  | -0.14 | 0.28 |
| 0  | -9  | 10 | -0.12 | 0.25 |
| -3 | -13 | 0  | -0.48 | 0.33 |
| -5 | -4  | 6  | 0.00  | 0.28 |
| 0  | -15 | 1  | 0.21  | 0.21 |
| -3 | -5  | 10 | 11.13 | 0.93 |
| -2 | -14 | 2  | 1.36  | 0.30 |
| -3 | -13 | 1  | 6.95  | 0.54 |



|    |     |    |       |      |
|----|-----|----|-------|------|
| -4 | -3  | 9  | 0.00  | 0.22 |
| -1 | -13 | 6  | 2.27  | 0.33 |
| -6 | 0   | 0  | 41.46 | 1.91 |
| -3 | -10 | 7  | 0.06  | 0.23 |
| -4 | -11 | 2  | -0.44 | 0.36 |
| -5 | -8  | 2  | 0.22  | 0.16 |
| -6 | -1  | 0  | 0.07  | 0.27 |
| -5 | 0   | 7  | 0.00  | 0.22 |
| -6 | 0   | 1  | 0.28  | 0.33 |
| -4 | -6  | 8  | -0.13 | 0.30 |
| -5 | -1  | 7  | 1.08  | 0.23 |
| -3 | -11 | 6  | 6.74  | 0.55 |
| -6 | -1  | 1  | -0.36 | 0.32 |
| -1 | -7  | 11 | 0.86  | 0.28 |
| -5 | -6  | 5  | 0.33  | 0.19 |
| -5 | -7  | 4  | 2.51  | 0.39 |
| -2 | -13 | 5  | 0.07  | 0.39 |
| -1 | -4  | 12 | -0.31 | 0.38 |
| -3 | -9  | 8  | 1.87  | 0.33 |
| 0  | -15 | 2  | 0.22  | 0.28 |
| -1 | -15 | 0  | 0.07  | 0.19 |
| -3 | -13 | 2  | 0.07  | 0.26 |
| -6 | -2  | 0  | 0.93  | 0.39 |
| -3 | 0   | 11 | -0.19 | 0.24 |
| -1 | -9  | 10 | 3.78  | 0.41 |
| 0  | -14 | 5  | 16.45 | 1.18 |
| -1 | -15 | 1  | 2.26  | 0.35 |
| -3 | -1  | 11 | 0.00  | 0.38 |
| -5 | -2  | 7  | 0.13  | 0.24 |
| -6 | -2  | 1  | 0.07  | 0.32 |
| 0  | -5  | 12 | -0.12 | 0.29 |
| -6 | 0   | 2  | 13.38 | 1.06 |
| -2 | 0   | 12 | 10.46 | 0.85 |
| -2 | -8  | 10 | 2.92  | 0.39 |
| -4 | -4  | 9  | 0.35  | 0.17 |
| -2 | -14 | 3  | 9.76  | 0.70 |
| -4 | -9  | 6  | 0.33  | 0.28 |
| -6 | -1  | 2  | 0.21  | 0.36 |
| -2 | -1  | 12 | -0.43 | 0.33 |
| -4 | -11 | 3  | -0.15 | 0.23 |
| -5 | -5  | 6  | 4.19  | 0.44 |
| -5 | -8  | 3  | 0.00  | 0.18 |
| -3 | -2  | 11 | 0.19  | 0.19 |
| -4 | -8  | 7  | 0.27  | 0.35 |
| -2 | -6  | 11 | 21.95 | 1.32 |
| 0  | -12 | 8  | 1.81  | 0.35 |
| -6 | -3  | 0  | -0.60 | 0.40 |
| -3 | -12 | 5  | -0.21 | 0.32 |
| -1 | -15 | 2  | 0.55  | 0.25 |
| -4 | -10 | 5  | 2.82  | 0.39 |
| -3 | -6  | 10 | -0.07 | 0.22 |
| -6 | -2  | 2  | 0.00  | 0.35 |
| -2 | -2  | 12 | 2.19  | 0.31 |
| 0  | -15 | 3  | 0.07  | 0.27 |
| -5 | -3  | 7  | 2.11  | 0.33 |
| -3 | -8  | 9  | 0.20  | 0.25 |
| 0  | -11 | 9  | 0.00  | 0.28 |
| -6 | -3  | 1  | -0.99 | 0.52 |

|    |     |    |       |      |
|----|-----|----|-------|------|
| -1 | -14 | 5  | 0.03  | 0.20 |
| -2 | -11 | 8  | 0.07  | 0.18 |
| -3 | -13 | 3  | 6.92  | 0.56 |
| 0  | -8  | 11 | 0.13  | 0.18 |
| -5 | -9  | 0  | -0.29 | 0.32 |
| -1 | -5  | 12 | 12.79 | 0.99 |
| 0  | -13 | 7  | 0.07  | 0.18 |
| -2 | -12 | 7  | 2.04  | 0.35 |
| -5 | -9  | 1  | 14.77 | 1.13 |
| -6 | 0   | 3  | 0.13  | 0.35 |
| -3 | -3  | 11 | 1.24  | 0.27 |
| -6 | -1  | 3  | 0.41  | 0.19 |
| -2 | -10 | 9  | 5.47  | 0.46 |
| -2 | -3  | 12 | 0.00  | 0.22 |
| -6 | -3  | 2  | -0.22 | 0.29 |
| -1 | -12 | 8  | -0.34 | 0.29 |
| -4 | -7  | 8  | 0.27  | 0.27 |
| -5 | -7  | 5  | 4.25  | 0.49 |
| -4 | -5  | 9  | -0.79 | 0.36 |
| -6 | -4  | 0  | 5.18  | 0.56 |
| -1 | -15 | 3  | 0.57  | 0.31 |
| 0  | -6  | 12 | 1.22  | 0.29 |
| 0  | 0   | 13 | -0.64 | 0.33 |
| -2 | -14 | 4  | 5.94  | 0.58 |
| -1 | -11 | 9  | 0.23  | 0.17 |
| 0  | -10 | 10 | 0.13  | 0.25 |
| -6 | -2  | 3  | 0.27  | 0.33 |
| -5 | -9  | 2  | 0.38  | 0.53 |
| -5 | -4  | 7  | 0.07  | 0.29 |
| -4 | -12 | 0  | 4.58  | 0.49 |
| -5 | -8  | 4  | 0.22  | 0.22 |
| -6 | -4  | 1  | -0.16 | 0.36 |
| -4 | -11 | 4  | 0.07  | 0.20 |
| -1 | -8  | 11 | -0.13 | 0.21 |
| 0  | -1  | 13 | -0.13 | 0.34 |
| -4 | 0   | 10 | 0.26  | 0.31 |
| -1 | -13 | 7  | 1.96  | 0.38 |
| -5 | -6  | 6  | -0.07 | 0.23 |
| -2 | -13 | 6  | -0.70 | 0.43 |
| -4 | -12 | 1  | 0.30  | 0.39 |
| -4 | -1  | 10 | -0.13 | 0.21 |
| -3 | -4  | 11 | -0.13 | 0.35 |
| 0  | -14 | 6  | 0.48  | 0.38 |
| 0  | -15 | 4  | -0.15 | 0.24 |
| 0  | -2  | 13 | 6.22  | 0.54 |
| -3 | -11 | 7  | 0.38  | 0.16 |
| -3 | -13 | 4  | -0.08 | 0.31 |
| -2 | -7  | 11 | -0.40 | 0.37 |
| -6 | -4  | 2  | 7.56  | 0.60 |
| -3 | -10 | 8  | 0.21  | 0.21 |
| -2 | -4  | 12 | -0.46 | 0.36 |
| -6 | -3  | 3  | -0.57 | 0.42 |
| -4 | -2  | 10 | 0.77  | 0.23 |
| -2 | -15 | 0  | 0.22  | 0.18 |
| -3 | -7  | 10 | 6.74  | 0.49 |
| -1 | -6  | 12 | 0.06  | 0.33 |
| -1 | 0   | 13 | -0.26 | 0.33 |
| -5 | 0   | 8  | -0.07 | 0.32 |

|    |     |    |       |      |
|----|-----|----|-------|------|
| -1 | -10 | 10 | -0.13 | 0.21 |
| -6 | 0   | 4  | 6.26  | 0.51 |
| -2 | -9  | 10 | -0.14 | 0.21 |
| -4 | -12 | 2  | 8.89  | 0.63 |
| -5 | -1  | 8  | 3.55  | 0.42 |
| -2 | -15 | 1  | -0.15 | 0.23 |
| -6 | -1  | 4  | -0.27 | 0.35 |
| -1 | -1  | 13 | 7.01  | 0.59 |
| -5 | -9  | 3  | 8.79  | 0.66 |
| -6 | -5  | 0  | 0.15  | 0.29 |
| -3 | -12 | 6  | -0.57 | 0.38 |
| -3 | -14 | 0  | 0.07  | 0.26 |
| -4 | -9  | 7  | -0.21 | 0.27 |
| -4 | -10 | 6  | -0.36 | 0.35 |
| 0  | -3  | 13 | -0.39 | 0.36 |
| -5 | -5  | 7  | 0.28  | 0.37 |
| -6 | -5  | 1  | 0.24  | 0.24 |
| -4 | -6  | 9  | 13.83 | 1.07 |
| -3 | -14 | 1  | 0.07  | 0.33 |
| -1 | -14 | 6  | -0.22 | 0.33 |
| -1 | -15 | 4  | 6.65  | 0.59 |
| -5 | -2  | 8  | -0.41 | 0.33 |
| -4 | -3  | 10 | 0.40  | 0.29 |
| -6 | -2  | 4  | 0.28  | 0.37 |
| -1 | -2  | 13 | -0.33 | 0.33 |
| -3 | -9  | 9  | -0.14 | 0.40 |
| 0  | -16 | 0  | 13.29 | 1.18 |
| 0  | -9  | 11 | -0.07 | 0.32 |
| -2 | -15 | 2  | 0.00  | 0.38 |
| -6 | -4  | 3  | -0.14 | 0.34 |
| -3 | -5  | 11 | 0.31  | 0.18 |
| 0  | -7  | 12 | -0.27 | 0.30 |
| 0  | -16 | 1  | 0.52  | 0.37 |
| -2 | -14 | 5  | 17.58 | 1.26 |
| -4 | -8  | 8  | 0.07  | 0.19 |
| -5 | -10 | 0  | 0.26  | 0.19 |
| -4 | -11 | 5  | -0.08 | 0.31 |
| -5 | -8  | 5  | -0.14 | 0.23 |
| -4 | -12 | 3  | 4.27  | 0.47 |
| -6 | -5  | 2  | -0.31 | 0.40 |
| -2 | -5  | 12 | -0.61 | 0.31 |
| -3 | -14 | 2  | 0.15  | 0.22 |
| -5 | -7  | 6  | 3.59  | 0.46 |
| -5 | -10 | 1  | 0.16  | 0.34 |
| -5 | -3  | 8  | 16.82 | 1.22 |
| -1 | -3  | 13 | 8.19  | 0.80 |
| -6 | -3  | 4  | -0.07 | 0.23 |
| 0  | -4  | 13 | 1.09  | 0.29 |
| 0  | -15 | 5  | 0.15  | 0.28 |
| 0  | -12 | 9  | 3.83  | 0.41 |
| 0  | -13 | 8  | -0.14 | 0.22 |
| 0  | -16 | 2  | 7.91  | 0.63 |
| -2 | -12 | 8  | 1.20  | 0.22 |
| -4 | -4  | 10 | -0.14 | 0.40 |
| -3 | -13 | 5  | 3.84  | 0.46 |
| -1 | -9  | 11 | 4.60  | 0.49 |
| -1 | -16 | 0  | 0.15  | 0.28 |
| -5 | -9  | 4  | 1.31  | 0.33 |

|    |     |    |       |      |
|----|-----|----|-------|------|
| -2 | -15 | 3  | -0.08 | 0.33 |
| -2 | -11 | 9  | -0.36 | 0.35 |
| -1 | -7  | 12 | 5.93  | 0.50 |
| -6 | -6  | 0  | 1.33  | 0.33 |
| -6 | 0   | 5  | 0.00  | 0.30 |
| -1 | -16 | 1  | -0.15 | 0.24 |
| -5 | -10 | 2  | 0.32  | 0.42 |
| -2 | -8  | 11 | -0.14 | 0.33 |
| -6 | -1  | 5  | 0.14  | 0.32 |
| -5 | -6  | 7  | 0.14  | 0.27 |
| -2 | -13 | 7  | 0.00  | 0.23 |
| -6 | -6  | 1  | -0.24 | 0.37 |
| -3 | 0   | 12 | -0.74 | 0.41 |
| -3 | -8  | 10 | 0.35  | 0.33 |
| 0  | -11 | 10 | -0.83 | 0.42 |
| -6 | -5  | 3  | 0.15  | 0.22 |
| -3 | -14 | 3  | -0.16 | 0.25 |
| -3 | -1  | 12 | 1.05  | 0.32 |
| -1 | -4  | 13 | -0.21 | 0.35 |
| -5 | -4  | 8  | -0.07 | 0.34 |
| -6 | -4  | 4  | 5.26  | 0.50 |
| 0  | -14 | 7  | 22.93 | 1.38 |
| -4 | -7  | 9  | 0.00  | 0.35 |
| -1 | -15 | 5  | 0.77  | 0.24 |
| -1 | -12 | 9  | 0.14  | 0.32 |
| -1 | -13 | 8  | 6.86  | 0.60 |
| -6 | -2  | 5  | 5.72  | 0.52 |
| -3 | -6  | 11 | -0.14 | 0.22 |
| -1 | -16 | 2  | -0.32 | 0.35 |
| -4 | -12 | 4  | 7.71  | 0.66 |
| 0  | -16 | 3  | 0.00  | 0.39 |
| -3 | -2  | 12 | -0.28 | 0.39 |
| 0  | -5  | 13 | -0.48 | 0.32 |
| -2 | -6  | 12 | 2.20  | 0.35 |
| -6 | -6  | 2  | 0.16  | 0.41 |
| -2 | 0   | 13 | 0.00  | 0.24 |
| -2 | -10 | 10 | -0.85 | 0.39 |
| -4 | -13 | 0  | 0.08  | 0.33 |
| -3 | -11 | 8  | 5.20  | 0.52 |
| -2 | -1  | 13 | -0.14 | 0.32 |
| -4 | -5  | 10 | 0.07  | 0.25 |
| -5 | -10 | 3  | -0.08 | 0.33 |
| -4 | -13 | 1  | 0.47  | 0.33 |
| -3 | -12 | 7  | -0.07 | 0.16 |
| -4 | -10 | 7  | 3.80  | 0.41 |
| -1 | -11 | 10 | 18.41 | 1.25 |
| 0  | -8  | 12 | 7.04  | 0.53 |
| -6 | -3  | 5  | 0.22  | 0.28 |
| -1 | -14 | 7  | 0.07  | 0.19 |
| -2 | -15 | 4  | -0.24 | 0.37 |
| -2 | -14 | 6  | 0.46  | 0.42 |
| -2 | -2  | 13 | 6.50  | 0.59 |
| -3 | -10 | 9  | -0.21 | 0.33 |
| -4 | -11 | 6  | -0.22 | 0.39 |
| -3 | -3  | 12 | 4.38  | 0.45 |
| -5 | -8  | 6  | -0.44 | 0.36 |
| -4 | -9  | 8  | 0.15  | 0.21 |
| 0  | -10 | 11 | 14.70 | 1.10 |

|    |     |    |       |      |
|----|-----|----|-------|------|
| -1 | -16 | 3  | 0.24  | 0.24 |
| -5 | -9  | 5  | 6.09  | 0.60 |
| -5 | 0   | 9  | 0.00  | 0.30 |
| -5 | -5  | 8  | 5.65  | 0.55 |
| -6 | -5  | 4  | 0.23  | 0.29 |
| -1 | -5  | 13 | 0.14  | 0.35 |
| -4 | -13 | 2  | 0.08  | 0.21 |
| -3 | -14 | 4  | 0.08  | 0.21 |
| -4 | 0   | 11 | 0.07  | 0.18 |
| -5 | -1  | 9  | 0.85  | 0.29 |
| -6 | -6  | 3  | 3.31  | 0.47 |
| -6 | -7  | 0  | -0.08 | 0.33 |
| 0  | -15 | 6  | -0.15 | 0.30 |
| -4 | -1  | 11 | 0.21  | 0.27 |
| -3 | -13 | 6  | 1.50  | 0.33 |
| -5 | -7  | 7  | 0.30  | 0.39 |
| -6 | -7  | 1  | -0.57 | 0.34 |
| -1 | -8  | 12 | 0.14  | 0.20 |
| -2 | -3  | 13 | 0.07  | 0.25 |
| -5 | -11 | 0  | -0.31 | 0.35 |
| -5 | -2  | 9  | 0.22  | 0.33 |
| 0  | -16 | 4  | 5.97  | 0.61 |
| -6 | 0   | 6  | 2.76  | 0.33 |
| -6 | -4  | 5  | 0.37  | 0.35 |
| -4 | -2  | 11 | 8.25  | 0.60 |
| 0  | -6  | 13 | 10.66 | 0.99 |
| -5 | -11 | 1  | 5.64  | 0.53 |
| -6 | -1  | 6  | 0.29  | 0.23 |
| -3 | -7  | 11 | 0.51  | 0.36 |
| -3 | -4  | 12 | 0.07  | 0.40 |
| -2 | -16 | 0  | 14.07 | 1.20 |
| -1 | -10 | 11 | -0.14 | 0.29 |
| -5 | -10 | 4  | 0.08  | 0.21 |
| -2 | -9  | 11 | 0.29  | 0.23 |
| -4 | -12 | 5  | 2.68  | 0.36 |
| -4 | -6  | 10 | 0.29  | 0.22 |
| -3 | -15 | 0  | -0.23 | 0.30 |
| -4 | -8  | 9  | -0.29 | 0.33 |
| -3 | -9  | 10 | 1.86  | 0.32 |
| -2 | -7  | 12 | 0.00  | 0.25 |
| -6 | -7  | 2  | 0.00  | 0.20 |
| -2 | -16 | 1  | 0.32  | 0.28 |
| -4 | -13 | 3  | 0.17  | 0.23 |
| -3 | -15 | 1  | 1.11  | 0.33 |
| -1 | -15 | 6  | 11.05 | 0.75 |
| 0  | 0   | 14 | 14.92 | 1.18 |
| -6 | -2  | 6  | 0.15  | 0.28 |
| -5 | -3  | 9  | 0.07  | 0.26 |
| 0  | -1  | 14 | 0.24  | 0.17 |
| -5 | -11 | 2  | 1.37  | 0.34 |
| -4 | -3  | 11 | -0.15 | 0.23 |
| -1 | -16 | 4  | 0.12  | 0.19 |
| -2 | -4  | 13 | 0.57  | 0.40 |
| 0  | -13 | 9  | -0.22 | 0.28 |
| -2 | -12 | 9  | 4.29  | 0.49 |
| -2 | -15 | 5  | -0.16 | 0.38 |
| -1 | -6  | 13 | -0.14 | 0.28 |
| -5 | -6  | 8  | -0.07 | 0.31 |

|    |     |    |       |      |
|----|-----|----|-------|------|
| -2 | -13 | 8  | -0.45 | 0.41 |
| -6 | -6  | 4  | -0.71 | 0.41 |
| -2 | -16 | 2  | 8.16  | 0.72 |
| 0  | -2  | 14 | 0.42  | 0.15 |
| -3 | -15 | 2  | 0.66  | 0.46 |
| 0  | -14 | 8  | 0.15  | 0.42 |
| 0  | -12 | 10 | 0.55  | 0.23 |
| -6 | -3  | 6  | -0.04 | 0.18 |
| -6 | -5  | 5  | -0.30 | 0.34 |
| 0  | -17 | 0  | -0.39 | 0.40 |
| -3 | -14 | 5  | -0.16 | 0.43 |
| 0  | -9  | 12 | 0.15  | 0.32 |
| -6 | -7  | 3  | 0.25  | 0.29 |
| -1 | 0   | 14 | -0.28 | 0.26 |
| -3 | -5  | 12 | 7.67  | 0.63 |
| 0  | -17 | 1  | -0.16 | 0.37 |
| -1 | -1  | 14 | 0.82  | 0.24 |
| -2 | -11 | 10 | 0.08  | 0.20 |
| -5 | -9  | 6  | 0.66  | 0.25 |
| -5 | -4  | 9  | -0.29 | 0.33 |
| -6 | -8  | 0  | 7.69  | 0.60 |
| 0  | -16 | 5  | 0.32  | 0.32 |
| -4 | -4  | 11 | 0.07  | 0.27 |
| -2 | -14 | 7  | 16.76 | 1.33 |
| -5 | -11 | 3  | 2.37  | 0.39 |
| 0  | -3  | 14 | 0.14  | 0.27 |
| -1 | -13 | 9  | 0.83  | 0.33 |
| -5 | -8  | 7  | 0.15  | 0.22 |
| -4 | -11 | 7  | 0.15  | 0.22 |
| -6 | -8  | 1  | 0.25  | 0.33 |
| -4 | -13 | 4  | -0.34 | 0.31 |
| -3 | -12 | 8  | 0.15  | 0.34 |
| 0  | -7  | 13 | 0.36  | 0.30 |
| -4 | -10 | 8  | 0.34  | 0.22 |
| -1 | -2  | 14 | -0.28 | 0.47 |
| -5 | -10 | 5  | -0.16 | 0.16 |
| -2 | -16 | 3  | 0.25  | 0.25 |
| -2 | -5  | 13 | 0.00  | 0.31 |
| 0  | -17 | 2  | 0.17  | 0.31 |
| -3 | -15 | 3  | 0.59  | 0.28 |
| -1 | -12 | 10 | 0.00  | 0.41 |
| -4 | -7  | 10 | 0.15  | 0.28 |
| -1 | -14 | 8  | 0.15  | 0.28 |
| -3 | -11 | 9  | -0.07 | 0.25 |
| -1 | -17 | 0  | 0.00  | 0.48 |
| -1 | -9  | 12 | 2.63  | 0.43 |
| -6 | -4  | 6  | 2.49  | 0.36 |
| 0  | -15 | 7  | -0.45 | 0.37 |
| -3 | -8  | 11 | -0.30 | 0.33 |
| 0  | -11 | 11 | 0.22  | 0.29 |
| -1 | -17 | 1  | 17.52 | 1.33 |
| -3 | -13 | 7  | 1.76  | 0.35 |
| -4 | -14 | 0  | 0.00  | 0.28 |
| -4 | -12 | 6  | 4.38  | 0.48 |
| -2 | -8  | 12 | 5.27  | 0.51 |
| -6 | -8  | 2  | 8.93  | 0.75 |
| -1 | -16 | 5  | -0.16 | 0.33 |
| -4 | -14 | 1  | 0.00  | 0.28 |

|    |     |    |       |      |
|----|-----|----|-------|------|
| -6 | 0   | 7  | 0.00  | 0.26 |
| -1 | -3  | 14 | 6.46  | 0.58 |
| -4 | -9  | 9  | -0.61 | 0.41 |
| 0  | -4  | 14 | 2.13  | 0.41 |
| -6 | -1  | 7  | 0.08  | 0.27 |
| -1 | -7  | 13 | 0.26  | 0.20 |
| -5 | -7  | 8  | 3.82  | 0.49 |
| -6 | -6  | 5  | 10.39 | 0.96 |
| -6 | -7  | 4  | -0.25 | 0.38 |
| -5 | -5  | 9  | -0.30 | 0.43 |
| -2 | -10 | 11 | 10.24 | 0.69 |
| -1 | -17 | 2  | 0.08  | 0.22 |
| -4 | -5  | 11 | -0.60 | 0.48 |
| -3 | -6  | 12 | -0.15 | 0.25 |
| -3 | 0   | 13 | 0.15  | 0.21 |
| -3 | -10 | 10 | 0.00  | 0.26 |
| 0  | -17 | 3  | -0.25 | 0.33 |
| -5 | -12 | 0  | 0.16  | 0.23 |
| -1 | -15 | 7  | 0.00  | 0.27 |
| -5 | -11 | 4  | 4.11  | 0.55 |
| -3 | -1  | 13 | 5.01  | 0.51 |
| -2 | -15 | 6  | 0.25  | 0.25 |
| -1 | -11 | 11 | 1.39  | 0.29 |
| -6 | -2  | 7  | 8.95  | 0.87 |
| -5 | 0   | 10 | 0.08  | 0.27 |
| -4 | -14 | 2  | 0.38  | 0.28 |
| -5 | -12 | 1  | 0.34  | 0.16 |
| -5 | -1  | 10 | 2.57  | 0.36 |
| -2 | -16 | 4  | 3.58  | 0.56 |
| -6 | -8  | 3  | 0.17  | 0.49 |
| -6 | -5  | 6  | -0.31 | 0.35 |
| -3 | -14 | 6  | -0.17 | 0.44 |
| -3 | -15 | 4  | 4.37  | 0.55 |
| -3 | -2  | 13 | -0.07 | 0.24 |
| -2 | -6  | 13 | 9.47  | 0.66 |
| -1 | -4  | 14 | 0.22  | 0.28 |
| -4 | -13 | 5  | -0.17 | 0.27 |
| -5 | -2  | 10 | 0.15  | 0.34 |
| -6 | -3  | 7  | -0.24 | 0.30 |
| -5 | -12 | 2  | 0.26  | 0.26 |
| 0  | -16 | 6  | 1.46  | 0.31 |
| 0  | -10 | 12 | -0.45 | 0.45 |
| -1 | -17 | 3  | 7.28  | 0.69 |
| 0  | -5  | 14 | 0.22  | 0.22 |
| 0  | -8  | 13 | 0.23  | 0.29 |
| -2 | 0   | 14 | 13.53 | 1.21 |
| -6 | -9  | 0  | 0.08  | 0.22 |
| -4 | 0   | 12 | 4.47  | 0.49 |
| -2 | -1  | 14 | -0.44 | 0.36 |
| -4 | -8  | 10 | 1.39  | 0.31 |
| -5 | -9  | 7  | 0.88  | 0.25 |
| -7 | 0   | 0  | 0.54  | 0.38 |
| -6 | -9  | 1  | 0.00  | 0.30 |
| -5 | -10 | 6  | -0.25 | 0.38 |
| -4 | -14 | 3  | 2.60  | 0.48 |
| -3 | -3  | 13 | 5.15  | 0.51 |
| -4 | -1  | 12 | 0.00  | 0.32 |
| -7 | -1  | 0  | 0.00  | 0.31 |

|    |     |    |       |      |
|----|-----|----|-------|------|
| -5 | -6  | 9  | -0.23 | 0.36 |
| -2 | -13 | 9  | 0.16  | 0.29 |
| -7 | 0   | 1  | 0.09  | 0.38 |
| -5 | -3  | 10 | 7.01  | 0.61 |
| 0  | -17 | 4  | 0.09  | 0.23 |
| -4 | -6  | 11 | 11.11 | 0.98 |
| -7 | -1  | 1  | 4.89  | 0.58 |
| -2 | -2  | 14 | -0.45 | 0.37 |
| -3 | -9  | 11 | 2.97  | 0.43 |
| -3 | -16 | 0  | 0.04  | 0.25 |
| -6 | -7  | 5  | -0.33 | 0.42 |
| 0  | -14 | 9  | 20.00 | 1.42 |
| -4 | -2  | 12 | 0.65  | 0.32 |
| 0  | -13 | 10 | -0.70 | 0.40 |
| -7 | -2  | 0  | -0.09 | 0.37 |
| -2 | -12 | 10 | 0.51  | 0.26 |
| -2 | -14 | 8  | 0.24  | 0.37 |
| -3 | -7  | 12 | 4.38  | 0.50 |
| -2 | -17 | 0  | -0.99 | 0.49 |
| -3 | -16 | 1  | -0.21 | 0.23 |
| -1 | -16 | 6  | 0.17  | 0.38 |
| -6 | -9  | 2  | -0.45 | 0.39 |
| -1 | -10 | 12 | -0.46 | 0.38 |
| -2 | -9  | 12 | 0.08  | 0.28 |
| -6 | -4  | 7  | 1.31  | 0.35 |
| -5 | -8  | 8  | 0.00  | 0.34 |
| -1 | -8  | 13 | 0.00  | 0.33 |
| -4 | -11 | 8  | -0.24 | 0.42 |
| -1 | -5  | 14 | 5.23  | 0.46 |
| -6 | -8  | 4  | 6.57  | 0.61 |
| -5 | -12 | 3  | -0.35 | 0.33 |
| -5 | -11 | 5  | 1.16  | 0.42 |
| -7 | -2  | 1  | -0.99 | 0.50 |
| -2 | -17 | 1  | 0.25  | 0.33 |
| -7 | 0   | 2  | -0.08 | 0.34 |
| -6 | -6  | 6  | 0.52  | 0.22 |
| -4 | -12 | 7  | 0.49  | 0.40 |
| -7 | -1  | 2  | 0.51  | 0.46 |
| -3 | -4  | 13 | 0.00  | 0.27 |
| -2 | -16 | 5  | -0.79 | 0.50 |
| 0  | -15 | 8  | 0.00  | 0.19 |
| -2 | -3  | 14 | 0.00  | 0.26 |
| -3 | -15 | 5  | 0.00  | 0.43 |
| -3 | -12 | 9  | 0.00  | 0.20 |
| -3 | -13 | 8  | 4.71  | 0.48 |
| -4 | -10 | 9  | 4.56  | 0.50 |
| -4 | -3  | 12 | -0.23 | 0.23 |
| -1 | -17 | 4  | 0.09  | 0.32 |
| -5 | -4  | 10 | -0.16 | 0.41 |
| -2 | -7  | 13 | -0.47 | 0.33 |
| -3 | -16 | 2  | -0.26 | 0.34 |
| 0  | -12 | 11 | 1.08  | 0.31 |
| -7 | -3  | 0  | 0.18  | 0.34 |
| 0  | -6  | 14 | 2.89  | 0.38 |
| -1 | -14 | 9  | -0.64 | 0.37 |
| -7 | -2  | 2  | 0.09  | 0.31 |
| -1 | -13 | 10 | 5.11  | 0.52 |
| -2 | -17 | 2  | 0.35  | 0.35 |



|    |     |    |       |      |
|----|-----|----|-------|------|
| -6 | 0   | 8  | 0.23  | 0.30 |
| -4 | -14 | 4  | 2.37  | 0.48 |
| -7 | -3  | 1  | 2.50  | 0.48 |
| -2 | -15 | 7  | 0.33  | 0.21 |
| -2 | -11 | 11 | 0.00  | 0.19 |
| -6 | -1  | 8  | 0.00  | 0.27 |
| -6 | -9  | 3  | 0.00  | 0.38 |
| -4 | -13 | 6  | 0.00  | 0.30 |
| -3 | -11 | 10 | 11.86 | 1.12 |
| -7 | 0   | 3  | -0.49 | 0.45 |
| -6 | -5  | 7  | 0.16  | 0.23 |
| -3 | -14 | 7  | 0.00  | 0.29 |
| -7 | -1  | 3  | 2.94  | 0.43 |
| -1 | -15 | 8  | 5.42  | 0.58 |
| 0  | -18 | 0  | 2.45  | 0.43 |
| -6 | -2  | 8  | 0.24  | 0.36 |
| -5 | -7  | 9  | 0.16  | 0.23 |
| -7 | -3  | 2  | 0.17  | 0.40 |
| -2 | -4  | 14 | 3.78  | 0.45 |
| 0  | -17 | 5  | -0.18 | 0.28 |
| -4 | -7  | 11 | 0.08  | 0.29 |
| -5 | -12 | 4  | 0.00  | 0.31 |
| -1 | -12 | 11 | -0.24 | 0.36 |
| -4 | -4  | 12 | 0.00  | 0.39 |
| 0  | -9  | 13 | -0.55 | 0.50 |
| 0  | -18 | 1  | 0.43  | 0.35 |
| 0  | 0   | 15 | -0.30 | 0.28 |
| -1 | -6  | 14 | 0.15  | 0.39 |
| -7 | -4  | 0  | -0.18 | 0.42 |
| -3 | -16 | 3  | -0.09 | 0.29 |
| -4 | -15 | 0  | -0.09 | 0.35 |
| -3 | -5  | 13 | 0.75  | 0.26 |
| 0  | -1  | 15 | 0.15  | 0.34 |
| -4 | -9  | 10 | 0.16  | 0.23 |
| 0  | -16 | 7  | -0.25 | 0.38 |
| -7 | -2  | 3  | 0.46  | 0.17 |
| -5 | -13 | 0  | -0.52 | 0.37 |
| -7 | -4  | 1  | 0.09  | 0.21 |
| -2 | -17 | 3  | -0.09 | 0.29 |
| -6 | -10 | 0  | -0.26 | 0.45 |
| -5 | -5  | 10 | 5.37  | 0.52 |
| -4 | -15 | 1  | 0.17  | 0.44 |
| -6 | -8  | 5  | 0.26  | 0.26 |
| -5 | -13 | 1  | 3.27  | 0.51 |
| -6 | -7  | 6  | 0.08  | 0.28 |
| -5 | -10 | 7  | -0.17 | 0.26 |
| -6 | -3  | 8  | 0.40  | 0.33 |
| -3 | -8  | 12 | -0.24 | 0.31 |
| 0  | -11 | 12 | 0.08  | 0.20 |
| -6 | -10 | 1  | 1.29  | 0.34 |
| 0  | -2  | 15 | 2.10  | 0.40 |
| 0  | -18 | 2  | 4.12  | 0.49 |
| -1 | -18 | 0  | -0.34 | 0.43 |
| -5 | -11 | 6  | 3.17  | 0.42 |
| -1 | -17 | 5  | 6.10  | 0.58 |
| -5 | -9  | 8  | 1.23  | 0.30 |
| -7 | -4  | 2  | 0.09  | 0.33 |
| -1 | -9  | 13 | 4.78  | 0.49 |

|    |     |    |       |      |
|----|-----|----|-------|------|
| -1 | -18 | 1  | -0.09 | 0.36 |
| -1 | 0   | 15 | -0.31 | 0.39 |
| -3 | -10 | 11 | -0.08 | 0.27 |
| -6 | -9  | 4  | -0.28 | 0.52 |
| -7 | -3  | 3  | 2.99  | 0.42 |
| -4 | -15 | 2  | -0.18 | 0.28 |
| 0  | -7  | 14 | 0.23  | 0.30 |
| -1 | -1  | 15 | 7.25  | 0.58 |
| -5 | -13 | 2  | -0.45 | 0.32 |
| -1 | -16 | 7  | 0.08  | 0.47 |
| -7 | 0   | 4  | 0.25  | 0.25 |
| -5 | 0   | 11 | 0.40  | 0.33 |
| -2 | -16 | 6  | 0.57  | 0.25 |
| -4 | -14 | 5  | 6.04  | 0.63 |
| -6 | -10 | 2  | -0.55 | 0.45 |
| -2 | -8  | 13 | 0.08  | 0.29 |
| -2 | -10 | 12 | 0.40  | 0.33 |
| -2 | -5  | 14 | 0.00  | 0.27 |
| -3 | -15 | 6  | 7.62  | 0.68 |
| -7 | -1  | 4  | 0.58  | 0.46 |
| -5 | -1  | 11 | 0.00  | 0.20 |
| 0  | -3  | 15 | 0.00  | 0.27 |
| -6 | -6  | 7  | 7.17  | 0.66 |
| -4 | -5  | 12 | -0.16 | 0.26 |
| -7 | -5  | 0  | -0.45 | 0.39 |
| -1 | -11 | 12 | 12.45 | 1.18 |
| -1 | -2  | 15 | -0.24 | 0.36 |
| -3 | -16 | 4  | -0.18 | 0.23 |
| -6 | -4  | 8  | 0.41  | 0.30 |
| -1 | -18 | 2  | 0.26  | 0.34 |
| -7 | -5  | 1  | 4.25  | 0.49 |
| -5 | -2  | 11 | -0.24 | 0.24 |
| 0  | -18 | 3  | 0.09  | 0.40 |
| -7 | -2  | 4  | 0.25  | 0.23 |
| -2 | -17 | 4  | 0.32  | 0.17 |
| -3 | -6  | 13 | 0.40  | 0.19 |
| -4 | -12 | 8  | 0.84  | 0.30 |
| -5 | -12 | 5  | 0.18  | 0.34 |
| -2 | -14 | 9  | 12.15 | 0.79 |
| -1 | -7  | 14 | 1.85  | 0.39 |
| -5 | -6  | 10 | -0.25 | 0.43 |
| -2 | -13 | 10 | 0.00  | 0.35 |
| -7 | -4  | 3  | -0.18 | 0.36 |
| -4 | -11 | 9  | 0.25  | 0.25 |
| -5 | -8  | 9  | 0.25  | 0.25 |
| -4 | -15 | 3  | -0.27 | 0.42 |
| -5 | -13 | 3  | 3.40  | 0.51 |
| -4 | -8  | 11 | 0.00  | 0.28 |
| -3 | 0   | 14 | -0.32 | 0.35 |
| -6 | -10 | 3  | 2.75  | 0.52 |
| 0  | -14 | 10 | -0.08 | 0.40 |
| -7 | -5  | 2  | 0.66  | 0.47 |
| -1 | -3  | 15 | 2.40  | 0.46 |
| -4 | -13 | 7  | 0.09  | 0.32 |
| 0  | -17 | 6  | 0.17  | 0.25 |
| -3 | -1  | 14 | 0.55  | 0.22 |
| 0  | -4  | 15 | 0.70  | 0.49 |
| -7 | -3  | 4  | 1.81  | 0.35 |

|    |     |    |       |      |
|----|-----|----|-------|------|
| -5 | -3  | 11 | 0.08  | 0.50 |
| 0  | -15 | 9  | -0.08 | 0.28 |
| -2 | -15 | 8  | -0.43 | 0.37 |
| -3 | -13 | 9  | 0.25  | 0.39 |
| -1 | -18 | 3  | 0.00  | 0.32 |
| -6 | -8  | 6  | 1.90  | 0.41 |
| 0  | -13 | 11 | 0.16  | 0.36 |
| -3 | -2  | 14 | 0.08  | 0.35 |
| -2 | -12 | 11 | 1.49  | 0.32 |
| 0  | -10 | 13 | 5.53  | 0.59 |
| -6 | 0   | 9  | 0.00  | 0.20 |
| -6 | -9  | 5  | -0.72 | 0.42 |
| -2 | -6  | 14 | 3.37  | 0.47 |
| -6 | -5  | 8  | -0.25 | 0.38 |
| -4 | -6  | 12 | 0.33  | 0.26 |
| -3 | -12 | 10 | 0.08  | 0.30 |
| -3 | -14 | 8  | -0.09 | 0.29 |
| -4 | 0   | 13 | 0.08  | 0.35 |
| -4 | -10 | 10 | 0.25  | 0.33 |
| -3 | -17 | 0  | 0.00  | 0.37 |
| -7 | -6  | 0  | 0.28  | 0.36 |
| -6 | -1  | 9  | -0.41 | 0.36 |
| -7 | 0   | 5  | -0.08 | 0.19 |
| -3 | -9  | 12 | 2.14  | 0.36 |
| -4 | -1  | 13 | 0.16  | 0.23 |
| -1 | -14 | 10 | -0.25 | 0.38 |
| 0  | -18 | 4  | 0.65  | 0.24 |
| -7 | -1  | 5  | 1.40  | 0.30 |
| -7 | -6  | 1  | 0.10  | 0.34 |
| -1 | -17 | 6  | 3.57  | 0.51 |
| -3 | -17 | 1  | 9.42  | 0.80 |
| 0  | -8  | 14 | 3.84  | 0.50 |
| -6 | -7  | 7  | -0.42 | 0.42 |
| -1 | -4  | 15 | 0.32  | 0.25 |
| -7 | -5  | 3  | 2.83  | 0.47 |
| -1 | -15 | 9  | 0.34  | 0.45 |
| -6 | -11 | 0  | 0.09  | 0.24 |
| 0  | -16 | 8  | 0.67  | 0.29 |
| -6 | -2  | 9  | 9.10  | 0.71 |
| -7 | -4  | 4  | -0.09 | 0.42 |
| -5 | -4  | 11 | 0.00  | 0.35 |
| -3 | -16 | 5  | -0.38 | 0.27 |
| -4 | -14 | 6  | 0.37  | 0.29 |
| -2 | -18 | 0  | 3.07  | 0.51 |
| -4 | -15 | 4  | 0.00  | 0.33 |
| -3 | -3  | 14 | 3.14  | 0.42 |
| -4 | -2  | 13 | 2.27  | 0.47 |
| -5 | -11 | 7  | 0.17  | 0.25 |
| -7 | -2  | 5  | 0.34  | 0.34 |
| -5 | -13 | 4  | 0.19  | 0.35 |
| -6 | -11 | 1  | -0.64 | 0.38 |
| -2 | -17 | 5  | 0.19  | 0.25 |
| 0  | -5  | 15 | 0.24  | 0.31 |
| -1 | -13 | 11 | -0.50 | 0.36 |
| -3 | -7  | 13 | 0.33  | 0.39 |
| -5 | -10 | 8  | 0.26  | 0.39 |
| -2 | 0   | 15 | 0.00  | 0.28 |
| -1 | -10 | 13 | 0.08  | 0.36 |

|    |     |    |       |      |
|----|-----|----|-------|------|
| -2 | -18 | 1  | 0.13  | 0.23 |
| -2 | -9  | 13 | 0.29  | 0.25 |
| -6 | -10 | 4  | 0.19  | 0.42 |
| -2 | -1  | 15 | 0.16  | 0.23 |
| -5 | -7  | 10 | 3.16  | 0.43 |
| -7 | -6  | 2  | 0.10  | 0.21 |
| -3 | -17 | 2  | -0.09 | 0.30 |
| -2 | -16 | 7  | 0.18  | 0.25 |
| 0  | -12 | 12 | 2.89  | 0.45 |
| -3 | -15 | 7  | -0.18 | 0.36 |
| -3 | -11 | 11 | 0.97  | 0.29 |
| -1 | -18 | 4  | 0.00  | 0.33 |
| -1 | -8  | 14 | -0.08 | 0.34 |
| -6 | -3  | 9  | -0.67 | 0.44 |
| -5 | -14 | 0  | -0.18 | 0.36 |
| -5 | -12 | 6  | -0.18 | 0.37 |
| -6 | -11 | 2  | -0.09 | 0.39 |
| -4 | -3  | 13 | 0.33  | 0.26 |
| -2 | -11 | 12 | 0.25  | 0.33 |
| -2 | -2  | 15 | 1.54  | 0.27 |
| -1 | -16 | 8  | -0.18 | 0.35 |
| -2 | -18 | 2  | 3.88  | 0.57 |
| -7 | -3  | 5  | 1.38  | 0.37 |
| -5 | -14 | 1  | 0.27  | 0.27 |
| -6 | -6  | 8  | 0.17  | 0.39 |
| -3 | -4  | 14 | 0.49  | 0.17 |
| -5 | -9  | 9  | -0.09 | 0.19 |
| -1 | -5  | 15 | 2.91  | 0.48 |
| -4 | -9  | 11 | 0.34  | 0.27 |
| -4 | -16 | 0  | 5.73  | 0.59 |
| -2 | -7  | 14 | -1.00 | 0.54 |
| -7 | -5  | 4  | 2.52  | 0.44 |
| -5 | -5  | 11 | 0.34  | 0.19 |
| -4 | -7  | 12 | -0.34 | 0.38 |
| -4 | -16 | 1  | -0.36 | 0.41 |
| -1 | -12 | 12 | 0.08  | 0.30 |
| -7 | -6  | 3  | -0.09 | 0.39 |
| -7 | -7  | 0  | -0.19 | 0.30 |
| -3 | -17 | 3  | 4.58  | 0.63 |
| -2 | -3  | 15 | -0.41 | 0.36 |
| -5 | -14 | 2  | 0.19  | 0.35 |
| 0  | -17 | 7  | -0.18 | 0.42 |
| 0  | -18 | 5  | 1.03  | 0.43 |
| -7 | -7  | 1  | 1.21  | 0.32 |
| -6 | -9  | 6  | -0.09 | 0.37 |
| 0  | -19 | 0  | -0.09 | 0.30 |
| -6 | -4  | 9  | 0.17  | 0.24 |
| 0  | -6  | 15 | 2.40  | 0.43 |
| -4 | -4  | 13 | -0.33 | 0.43 |
| -6 | -11 | 3  | 0.29  | 0.29 |
| -7 | 0   | 6  | 0.00  | 0.37 |
| -7 | -4  | 5  | 0.00  | 0.21 |
| -4 | -15 | 5  | -0.19 | 0.30 |
| -2 | -18 | 3  | 0.00  | 0.23 |
| -4 | -12 | 9  | 1.88  | 0.40 |
| -6 | -8  | 7  | -0.71 | 0.47 |
| 0  | -19 | 1  | 0.00  | 0.39 |
| -4 | -13 | 8  | -0.09 | 0.29 |

|    |     |    |       |      |
|----|-----|----|-------|------|
| -7 | -1  | 6  | 1.83  | 0.34 |
| -4 | -16 | 2  | 4.41  | 0.60 |
| -5 | -13 | 5  | 2.03  | 0.43 |
| -6 | -10 | 5  | 2.23  | 0.41 |
| 0  | -9  | 14 | 0.16  | 0.37 |
| -7 | -7  | 2  | 0.30  | 0.38 |
| -3 | -16 | 6  | 0.29  | 0.37 |
| -3 | -10 | 12 | 0.00  | 0.28 |
| -3 | -8  | 13 | 0.09  | 0.37 |
| 0  | -11 | 13 | 0.00  | 0.36 |
| -3 | -5  | 14 | 3.81  | 0.46 |
| -2 | -14 | 10 | 0.39  | 0.20 |
| -7 | -2  | 6  | 0.00  | 0.22 |
| -1 | -17 | 7  | 1.28  | 0.38 |
| -5 | 0   | 12 | 0.09  | 0.30 |
| -2 | -17 | 6  | 0.05  | 0.21 |
| -1 | -18 | 5  | 0.19  | 0.27 |
| -2 | -4  | 15 | 0.17  | 0.37 |
| -4 | -11 | 10 | -0.35 | 0.39 |
| -5 | -8  | 10 | -0.44 | 0.44 |
| 0  | -19 | 2  | 0.09  | 0.27 |
| -5 | -14 | 3  | 0.39  | 0.30 |
| -5 | -1  | 12 | 0.98  | 0.27 |
| -1 | -19 | 0  | -0.27 | 0.47 |
| -2 | -15 | 9  | -0.53 | 0.37 |
| -1 | -6  | 15 | 0.25  | 0.32 |
| -4 | -14 | 7  | 9.14  | 0.79 |
| -1 | -19 | 1  | 1.57  | 0.38 |
| -3 | -17 | 4  | 0.20  | 0.27 |
| -5 | -6  | 11 | 0.26  | 0.45 |
| -7 | -6  | 4  | -0.85 | 0.55 |
| -6 | -7  | 8  | 0.09  | 0.23 |
| -2 | -13 | 11 | -0.43 | 0.53 |
| 0  | -15 | 10 | -0.60 | 0.41 |
| -2 | -10 | 13 | 3.80  | 0.56 |
| -6 | -5  | 9  | -0.04 | 0.24 |
| -3 | -14 | 9  | -0.09 | 0.37 |
| 0  | 0   | 16 | 11.96 | 1.13 |
| -4 | -16 | 3  | -0.10 | 0.40 |
| -5 | -2  | 12 | 0.17  | 0.24 |
| -3 | -13 | 10 | 2.52  | 0.44 |
| -4 | -5  | 13 | -0.08 | 0.42 |
| -1 | -9  | 14 | 0.98  | 0.31 |
| -7 | -3  | 6  | 3.12  | 0.50 |
| -7 | -5  | 5  | 1.27  | 0.36 |
| 0  | -14 | 11 | 6.76  | 0.61 |
| 0  | -1  | 16 | -0.41 | 0.50 |
| -5 | -11 | 8  | 2.63  | 0.48 |
| -6 | -11 | 4  | -0.69 | 0.53 |
| -6 | -12 | 0  | 3.85  | 0.52 |
| -1 | -11 | 13 | 3.15  | 0.45 |
| -7 | -7  | 3  | 1.73  | 0.40 |
| -6 | 0   | 10 | 0.35  | 0.27 |
| -2 | -18 | 4  | -0.10 | 0.40 |
| -2 | -8  | 14 | 3.34  | 0.44 |
| -1 | -19 | 2  | 0.38  | 0.29 |
| -5 | -12 | 7  | 0.09  | 0.34 |
| -6 | -12 | 1  | 0.29  | 0.37 |

|    |     |    |       |      |
|----|-----|----|-------|------|
| 0  | -16 | 9  | 0.53  | 0.24 |
| -6 | -1  | 10 | 0.18  | 0.39 |
| -4 | -8  | 12 | 3.36  | 0.50 |
| -2 | -16 | 8  | -0.28 | 0.36 |
| -7 | -8  | 0  | -0.19 | 0.30 |
| 0  | -19 | 3  | -0.57 | 0.47 |
| 0  | -2  | 16 | -0.08 | 0.34 |
| 0  | -7  | 15 | 0.08  | 0.30 |
| -3 | -15 | 8  | 5.15  | 0.63 |
| -5 | -10 | 9  | 0.00  | 0.22 |
| -7 | -8  | 1  | -0.78 | 0.46 |
| -5 | -3  | 12 | 2.10  | 0.41 |
| -2 | -5  | 15 | -0.25 | 0.48 |
| -3 | -12 | 11 | 0.00  | 0.31 |
| -1 | -15 | 10 | 5.71  | 0.57 |
| 0  | -18 | 6  | 0.00  | 0.33 |
| -6 | -2  | 10 | -0.09 | 0.47 |
| -4 | -10 | 11 | 6.34  | 0.67 |
| -3 | -6  | 14 | 0.09  | 0.23 |
| -1 | 0   | 16 | -0.17 | 0.34 |
| 0  | -13 | 12 | -0.35 | 0.39 |
| -5 | -14 | 4  | -0.79 | 0.46 |
| -1 | -14 | 11 | -0.35 | 0.33 |
| -6 | -12 | 2  | 3.46  | 0.59 |
| -1 | -1  | 16 | 3.01  | 0.37 |
| -2 | -12 | 12 | 2.16  | 0.39 |
| -7 | -4  | 6  | 0.00  | 0.22 |
| -4 | -15 | 6  | -0.29 | 0.38 |
| 0  | -3  | 16 | 0.34  | 0.27 |
| -5 | -13 | 6  | 0.97  | 0.32 |
| -6 | -9  | 7  | -0.46 | 0.40 |
| -1 | -16 | 9  | -0.09 | 0.30 |
| -7 | -8  | 2  | -0.40 | 0.38 |
| -6 | -10 | 6  | 0.48  | 0.39 |
| -4 | -16 | 4  | 4.07  | 0.51 |
| -1 | -19 | 3  | 0.89  | 0.34 |
| -1 | -2  | 16 | 0.00  | 0.36 |
| -1 | -7  | 15 | 0.26  | 0.26 |
| -7 | 0   | 7  | -0.35 | 0.25 |
| -6 | -6  | 9  | 6.20  | 0.58 |
| -3 | -18 | 0  | -0.37 | 0.35 |
| -6 | -3  | 10 | 0.26  | 0.19 |
| 0  | -17 | 8  | -0.37 | 0.34 |
| -4 | -6  | 13 | 5.28  | 0.50 |
| -7 | -1  | 7  | 0.00  | 0.38 |
| -7 | -7  | 4  | 0.59  | 0.64 |
| -7 | -6  | 5  | -0.37 | 0.35 |
| -5 | -7  | 11 | 0.18  | 0.45 |
| -3 | -17 | 5  | 3.41  | 0.53 |
| -3 | 0   | 15 | 0.17  | 0.24 |
| -3 | -9  | 13 | 2.71  | 0.45 |
| -5 | -4  | 12 | 0.09  | 0.32 |
| -1 | -18 | 6  | 0.10  | 0.26 |
| -3 | -18 | 1  | 0.19  | 0.27 |
| -5 | -15 | 0  | 0.33  | 0.17 |
| -3 | -1  | 15 | 4.40  | 0.54 |
| -1 | -13 | 12 | 0.85  | 0.25 |
| 0  | -10 | 14 | -0.26 | 0.34 |

|    |     |    |       |      |
|----|-----|----|-------|------|
| -5 | -9  | 10 | 1.58  | 0.29 |
| -3 | -16 | 7  | -0.10 | 0.32 |
| -6 | -8  | 8  | -0.18 | 0.29 |
| 0  | -19 | 4  | -0.20 | 0.32 |
| -5 | -15 | 1  | 0.77  | 0.33 |
| -4 | 0   | 14 | 4.91  | 0.62 |
| -6 | -12 | 3  | 0.40  | 0.40 |
| -6 | -11 | 5  | -0.20 | 0.40 |
| -7 | -2  | 7  | 0.50  | 0.27 |
| -2 | -17 | 7  | -0.48 | 0.42 |
| -1 | -3  | 16 | 0.61  | 0.43 |
| -2 | -18 | 5  | 1.41  | 0.40 |
| -4 | -1  | 14 | -0.51 | 0.42 |
| -3 | -2  | 15 | -0.34 | 0.44 |
| -3 | -11 | 12 | 8.55  | 0.74 |
| 0  | -4  | 16 | 4.67  | 0.54 |
| -2 | -19 | 0  | -0.19 | 0.38 |
| -2 | -6  | 15 | 2.29  | 0.39 |
| -3 | -18 | 2  | 0.29  | 0.29 |
| -7 | -5  | 6  | 1.15  | 0.34 |
| -7 | -8  | 3  | -0.20 | 0.20 |
| -4 | -13 | 9  | -0.18 | 0.43 |
| -2 | -19 | 1  | 0.10  | 0.34 |
| -1 | -17 | 8  | 2.63  | 0.40 |
| -6 | -4  | 10 | -0.09 | 0.37 |
| 0  | -12 | 13 | 3.04  | 0.41 |
| -4 | -2  | 14 | -0.09 | 0.36 |
| -5 | -15 | 2  | 0.10  | 0.43 |
| 0  | -8  | 15 | 0.17  | 0.32 |
| -3 | -7  | 14 | 1.30  | 0.33 |
| -2 | -9  | 14 | -0.36 | 0.40 |
| -1 | -10 | 14 | -0.27 | 0.35 |
| -4 | -14 | 8  | 0.48  | 0.40 |
| -7 | -3  | 7  | 0.46  | 0.54 |
| -4 | -12 | 10 | 0.00  | 0.22 |
| -4 | -17 | 0  | 0.10  | 0.34 |
| -5 | -14 | 5  | 0.00  | 0.25 |
| -1 | -19 | 4  | 2.07  | 0.39 |
| -4 | -9  | 12 | -0.45 | 0.32 |
| -2 | -11 | 13 | -0.27 | 0.41 |
| -7 | -9  | 0  | 0.39  | 0.31 |
| -5 | -5  | 12 | 3.97  | 0.50 |
| -3 | -3  | 15 | 3.00  | 0.47 |
| -4 | -17 | 1  | 0.00  | 0.24 |
| -2 | -19 | 2  | 0.10  | 0.26 |
| -7 | -9  | 1  | 3.56  | 0.57 |
| -1 | -4  | 16 | -0.17 | 0.28 |
| -4 | -16 | 5  | -0.51 | 0.45 |
| -4 | -3  | 14 | 0.35  | 0.28 |
| -3 | -18 | 3  | 0.30  | 0.38 |
| -6 | -7  | 9  | 0.18  | 0.26 |
| -4 | -7  | 13 | -0.27 | 0.42 |
| -5 | -12 | 8  | 0.43  | 0.25 |
| -1 | -12 | 13 | -0.18 | 0.36 |
| 0  | -18 | 7  | 3.97  | 0.58 |
| -6 | -12 | 4  | 2.01  | 0.46 |
| -2 | -15 | 10 | -0.09 | 0.31 |
| -7 | -7  | 5  | 0.98  | 0.30 |

|    |     |    |       |      |
|----|-----|----|-------|------|
| 0  | -5  | 16 | 0.18  | 0.25 |
| -2 | 0   | 16 | 11.37 | 0.81 |
| -1 | -8  | 15 | -0.35 | 0.33 |
| -4 | -17 | 2  | 0.69  | 0.22 |
| -5 | -15 | 3  | 0.50  | 0.41 |
| -5 | -11 | 9  | -0.84 | 0.48 |
| -2 | -14 | 11 | 3.92  | 0.51 |
| -2 | -1  | 16 | 0.00  | 0.43 |
| -7 | -9  | 2  | 0.61  | 0.44 |
| -6 | -13 | 0  | 0.19  | 0.23 |
| -7 | -4  | 7  | -0.37 | 0.42 |
| -5 | -8  | 11 | -0.28 | 0.36 |
| -7 | -8  | 4  | -0.21 | 0.41 |
| -4 | -15 | 7  | 0.30  | 0.39 |
| -6 | -5  | 10 | 0.18  | 0.26 |
| -4 | -11 | 11 | 0.28  | 0.42 |
| 0  | -19 | 5  | -0.10 | 0.42 |
| -3 | -14 | 10 | 0.09  | 0.33 |
| -7 | -6  | 6  | 0.00  | 0.33 |
| -5 | -13 | 7  | 0.50  | 0.59 |
| -3 | -17 | 6  | 2.04  | 0.48 |
| -6 | -13 | 1  | 0.00  | 0.24 |
| -3 | -4  | 15 | 0.09  | 0.38 |
| -6 | -10 | 7  | 1.50  | 0.40 |
| -2 | -16 | 9  | -0.28 | 0.37 |
| -3 | -15 | 9  | 0.10  | 0.25 |
| -2 | -19 | 3  | -0.10 | 0.33 |
| -2 | -2  | 16 | -0.35 | 0.45 |
| -2 | -7  | 15 | -0.35 | 0.40 |
| 0  | -20 | 0  | 8.97  | 0.77 |
| 0  | -15 | 11 | -0.18 | 0.29 |
| 0  | -16 | 10 | -0.18 | 0.37 |
| -4 | -4  | 14 | 0.85  | 0.33 |
| -6 | -11 | 6  | 0.00  | 0.35 |
| -3 | -13 | 11 | 0.33  | 0.28 |
| -1 | -18 | 7  | -0.30 | 0.38 |
| -3 | -10 | 13 | 0.37  | 0.37 |
| -6 | -9  | 8  | 0.28  | 0.23 |
| -2 | -18 | 6  | 0.10  | 0.45 |
| 0  | -20 | 1  | 0.30  | 0.38 |
| -1 | -5  | 16 | 0.27  | 0.19 |
| -5 | -6  | 12 | -0.83 | 0.48 |
| -7 | 0   | 8  | 0.00  | 0.32 |
| -6 | -13 | 2  | 0.20  | 0.24 |
| -5 | 0   | 13 | -0.09 | 0.37 |
| -2 | -13 | 12 | 0.37  | 0.29 |
| -5 | -10 | 10 | 0.09  | 0.34 |
| -6 | 0   | 11 | 0.37  | 0.37 |
| -4 | -17 | 3  | -0.30 | 0.30 |
| -1 | -19 | 5  | -0.42 | 0.47 |
| -7 | -1  | 8  | 0.55  | 0.60 |
| -5 | -1  | 13 | 2.56  | 0.43 |
| -6 | -1  | 11 | 0.37  | 0.17 |
| -7 | -9  | 3  | 2.41  | 0.47 |
| -3 | -18 | 4  | 0.36  | 0.18 |
| 0  | -14 | 12 | -0.46 | 0.33 |
| -3 | -8  | 14 | -0.09 | 0.31 |
| -2 | -3  | 16 | 0.27  | 0.35 |



|    |     |    |       |      |
|----|-----|----|-------|------|
| 0  | -11 | 14 | -0.28 | 0.42 |
| -8 | 0   | 0  | 11.53 | 0.91 |
| -3 | -16 | 8  | 0.10  | 0.43 |
| -8 | -1  | 0  | 0.00  | 0.45 |
| -7 | -5  | 7  | -0.19 | 0.50 |
| 0  | -20 | 2  | 6.05  | 0.71 |
| -5 | -14 | 6  | 0.10  | 0.27 |
| 0  | -17 | 9  | 0.09  | 0.24 |
| -1 | -20 | 0  | -0.10 | 0.40 |
| -8 | 0   | 1  | -0.74 | 0.57 |
| -1 | -15 | 11 | -0.37 | 0.48 |
| -5 | -15 | 4  | 2.16  | 0.44 |
| 0  | -9  | 15 | -0.18 | 0.36 |
| 0  | -6  | 16 | 0.54  | 0.44 |
| -7 | -2  | 8  | -0.37 | 0.35 |
| -5 | -2  | 13 | 0.36  | 0.29 |
| -6 | -2  | 11 | 4.61  | 0.59 |
| -1 | -16 | 10 | -0.28 | 0.43 |
| -2 | -17 | 8  | 0.25  | 0.16 |
| -8 | -1  | 1  | 0.21  | 0.30 |
| -3 | -5  | 15 | 1.93  | 0.38 |
| -6 | -12 | 5  | 0.62  | 0.44 |
| -1 | -20 | 1  | 0.40  | 0.40 |
| -6 | -6  | 10 | 0.00  | 0.40 |
| -8 | -2  | 0  | 0.53  | 0.44 |
| -2 | -10 | 14 | 0.00  | 0.39 |
| -6 | -8  | 9  | -0.10 | 0.31 |
| -3 | -12 | 12 | 0.09  | 0.34 |
| -4 | -16 | 6  | 0.57  | 0.25 |
| -4 | -10 | 12 | 0.37  | 0.37 |
| -2 | -19 | 4  | -0.10 | 0.42 |
| -4 | -8  | 13 | 0.00  | 0.39 |
| -6 | -13 | 3  | 0.00  | 0.25 |
| -4 | -5  | 14 | 0.18  | 0.26 |
| -7 | -10 | 0  | -0.10 | 0.42 |
| -7 | -8  | 5  | -0.82 | 0.54 |
| -8 | -2  | 1  | -0.43 | 0.61 |
| -8 | 0   | 2  | 3.71  | 0.59 |
| -1 | -14 | 12 | 0.28  | 0.23 |
| -1 | -11 | 14 | 2.19  | 0.38 |
| -7 | -7  | 6  | 1.86  | 0.37 |
| -7 | -10 | 1  | -0.10 | 0.42 |
| -7 | -3  | 8  | 6.29  | 0.67 |
| -2 | -4  | 16 | 3.56  | 0.55 |
| -8 | -1  | 2  | -0.21 | 0.41 |
| -5 | -3  | 13 | 1.94  | 0.49 |
| -6 | -3  | 11 | -0.28 | 0.43 |
| -1 | -20 | 2  | -0.20 | 0.32 |
| -1 | -17 | 9  | 0.24  | 0.23 |
| -1 | -6  | 16 | 0.00  | 0.22 |
| -1 | -9  | 15 | 3.39  | 0.45 |
| 0  | -20 | 3  | 0.52  | 0.21 |
| 0  | -19 | 6  | 0.67  | 0.23 |
| -4 | -17 | 4  | -0.10 | 0.23 |
| 0  | -13 | 13 | -0.09 | 0.38 |
| -8 | -3  | 0  | 0.00  | 0.37 |
| -2 | -12 | 13 | 1.69  | 0.38 |
| -7 | -9  | 4  | -0.11 | 0.57 |

|    |     |    |       |      |
|----|-----|----|-------|------|
| -5 | -9  | 11 | 1.23  | 0.31 |
| -5 | -16 | 0  | -0.20 | 0.46 |
| -4 | -14 | 9  | 7.63  | 0.77 |
| -8 | -2  | 2  | -0.53 | 0.53 |
| -2 | -8  | 15 | -0.09 | 0.21 |
| -4 | -13 | 10 | 0.10  | 0.35 |
| -5 | -7  | 12 | 2.20  | 0.47 |
| -8 | -3  | 1  | 0.11  | 0.39 |
| -5 | -16 | 1  | 0.10  | 0.36 |
| -7 | -10 | 2  | 0.42  | 0.33 |
| 0  | -18 | 8  | 0.54  | 0.24 |
| -7 | -6  | 7  | 0.00  | 0.24 |
| -3 | -17 | 7  | 0.78  | 0.37 |
| -3 | -18 | 5  | -0.63 | 0.52 |
| -8 | 0   | 3  | 0.29  | 0.29 |
| -3 | -19 | 0  | 0.10  | 0.50 |
| 0  | 0   | 17 | 0.00  | 0.22 |
| -3 | -6  | 15 | -0.09 | 0.31 |
| -7 | -4  | 8  | 0.29  | 0.44 |
| -5 | -4  | 13 | -0.38 | 0.42 |
| -4 | -15 | 8  | 0.20  | 0.38 |
| -6 | -4  | 11 | -0.47 | 0.41 |
| -8 | -1  | 3  | 0.20  | 0.37 |
| 0  | -1  | 17 | 0.00  | 0.31 |
| 0  | -7  | 16 | -0.27 | 0.42 |
| -5 | -15 | 5  | 0.11  | 0.27 |
| -5 | -12 | 9  | -0.49 | 0.43 |
| -1 | -20 | 3  | 0.00  | 0.25 |
| -1 | -19 | 6  | 2.64  | 0.45 |
| -3 | -19 | 1  | 0.60  | 0.37 |
| -6 | -11 | 7  | -0.41 | 0.38 |
| -5 | -13 | 8  | 2.72  | 0.48 |
| -8 | -3  | 2  | 0.00  | 0.45 |
| -6 | -13 | 4  | 0.53  | 0.21 |
| -1 | -13 | 13 | -0.09 | 0.31 |
| -5 | -16 | 2  | 0.31  | 0.22 |
| -2 | -18 | 7  | 2.39  | 0.54 |
| -6 | -10 | 8  | 0.20  | 0.44 |
| -4 | -12 | 11 | 0.57  | 0.52 |
| -4 | -6  | 14 | 1.04  | 0.30 |
| -2 | -5  | 16 | 0.09  | 0.40 |
| -8 | -4  | 0  | 2.74  | 0.51 |
| -6 | -7  | 10 | -0.29 | 0.37 |
| -3 | -9  | 14 | 0.00  | 0.52 |
| 0  | -2  | 17 | 1.27  | 0.33 |
| -8 | -2  | 3  | 0.51  | 0.32 |
| -8 | -4  | 1  | 0.27  | 0.22 |
| -3 | -11 | 13 | 0.67  | 0.58 |
| -2 | -19 | 5  | 0.21  | 0.40 |
| -1 | -18 | 8  | -0.61 | 0.50 |
| -7 | -10 | 3  | -0.43 | 0.40 |
| 0  | -20 | 4  | 1.49  | 0.43 |
| -5 | -11 | 10 | 4.48  | 0.61 |
| -3 | -19 | 2  | 0.72  | 0.23 |
| -6 | -12 | 6  | 0.16  | 0.33 |
| -6 | -14 | 0  | -0.81 | 0.47 |
| -1 | 0   | 17 | -0.09 | 0.30 |
| -5 | -14 | 7  | 0.10  | 0.38 |

|    |     |    |       |      |
|----|-----|----|-------|------|
| -6 | -14 | 1  | -0.31 | 0.40 |
| -1 | -1  | 17 | 2.38  | 0.47 |
| -2 | -15 | 11 | -0.48 | 0.42 |
| -4 | -18 | 0  | 0.65  | 0.28 |
| -2 | -20 | 0  | 7.21  | 0.78 |
| -1 | -7  | 16 | -0.09 | 0.38 |
| 0  | -10 | 15 | 0.74  | 0.57 |
| -6 | -9  | 9  | -0.20 | 0.31 |
| -2 | -16 | 10 | 0.05  | 0.25 |
| -7 | -8  | 6  | 0.20  | 0.38 |
| -4 | -17 | 5  | -0.43 | 0.40 |
| -4 | -18 | 1  | -0.31 | 0.39 |
| -4 | 0   | 15 | 0.18  | 0.26 |
| -3 | -15 | 10 | 4.10  | 0.50 |
| -8 | -4  | 2  | 2.57  | 0.53 |
| -4 | -9  | 13 | -0.29 | 0.44 |
| -2 | -20 | 1  | -0.71 | 0.55 |
| -8 | -3  | 3  | 0.42  | 0.33 |
| 0  | -3  | 17 | -0.46 | 0.46 |
| -7 | -9  | 5  | 1.85  | 0.43 |
| -7 | 0   | 9  | 0.09  | 0.34 |
| -3 | 0   | 16 | 0.37  | 0.17 |
| -5 | -16 | 3  | -1.57 | 0.60 |
| 0  | -12 | 14 | 2.39  | 0.47 |
| -4 | -1  | 15 | -0.74 | 0.43 |
| -7 | -5  | 8  | 2.05  | 0.42 |
| -5 | -5  | 13 | 0.38  | 0.24 |
| -6 | -5  | 11 | 0.29  | 0.20 |
| -8 | 0   | 4  | 0.84  | 0.36 |
| -3 | -14 | 11 | 0.00  | 0.34 |
| -7 | -1  | 9  | 0.38  | 0.30 |
| -4 | -16 | 7  | -0.21 | 0.21 |
| -3 | -1  | 16 | 1.76  | 0.37 |
| -1 | -2  | 17 | -1.11 | 0.55 |
| -8 | -1  | 4  | 0.30  | 0.29 |
| -6 | -14 | 2  | 0.31  | 0.40 |
| -1 | -20 | 4  | 0.11  | 0.28 |
| -2 | -14 | 12 | -0.39 | 0.43 |
| -2 | -11 | 14 | -0.48 | 0.42 |
| -7 | -7  | 7  | -0.20 | 0.32 |
| -8 | -5  | 0  | 0.00  | 0.37 |
| -3 | -16 | 9  | 0.30  | 0.31 |
| -4 | -11 | 12 | 0.09  | 0.48 |
| -5 | -8  | 12 | -0.10 | 0.32 |
| -4 | -2  | 15 | 0.64  | 0.56 |
| 0  | -16 | 11 | 0.29  | 0.34 |
| -7 | -2  | 9  | 0.29  | 0.37 |
| -7 | -11 | 0  | 0.41  | 0.33 |
| -4 | -18 | 2  | 1.65  | 0.43 |
| -3 | -19 | 3  | 1.41  | 0.33 |
| -2 | -20 | 2  | 5.40  | 0.63 |
| -8 | -5  | 1  | 0.22  | 0.31 |
| -3 | -2  | 16 | -0.37 | 0.26 |
| -3 | -7  | 15 | -0.10 | 0.39 |
| -2 | -17 | 9  | 0.00  | 0.35 |
| -2 | -6  | 16 | 0.97  | 0.24 |
| -1 | -10 | 15 | -0.29 | 0.37 |
| -2 | -9  | 15 | -0.10 | 0.39 |

|    |     |    |       |      |
|----|-----|----|-------|------|
| -8 | -2  | 4  | 0.10  | 0.27 |
| 0  | -19 | 7  | 0.00  | 0.36 |
| -7 | -11 | 1  | 1.73  | 0.37 |
| -3 | -18 | 6  | -0.11 | 0.24 |
| -6 | -13 | 5  | 0.11  | 0.39 |
| -5 | -10 | 11 | 0.00  | 0.24 |
| -7 | -10 | 4  | -0.33 | 0.57 |
| 0  | -15 | 12 | 0.29  | 0.29 |
| -1 | -3  | 17 | 2.53  | 0.45 |
| 0  | -17 | 10 | -0.49 | 0.49 |
| -4 | -7  | 14 | -0.10 | 0.32 |
| -1 | -12 | 14 | 0.00  | 0.34 |
| 0  | -4  | 17 | 0.19  | 0.35 |
| -8 | -4  | 3  | 0.22  | 0.21 |
| -3 | -13 | 12 | 0.19  | 0.44 |
| 0  | -8  | 16 | 3.90  | 0.53 |
| -5 | -15 | 6  | 3.15  | 0.54 |
| -4 | -3  | 15 | -0.75 | 0.50 |
| -8 | -5  | 2  | 0.17  | 0.21 |
| -6 | 0   | 12 | 2.58  | 0.45 |
| -7 | -3  | 9  | 0.39  | 0.22 |
| -3 | -3  | 16 | 0.51  | 0.30 |
| 0  | -20 | 5  | 1.26  | 0.32 |
| -6 | -8  | 10 | 0.64  | 0.25 |
| -6 | -14 | 3  | 1.81  | 0.47 |
| -7 | -11 | 2  | 0.91  | 0.26 |
| -6 | -1  | 12 | -0.39 | 0.49 |
| -8 | -3  | 4  | -0.93 | 0.47 |
| -1 | -16 | 11 | -0.30 | 0.38 |
| -5 | -16 | 4  | 0.11  | 0.29 |
| -2 | -19 | 6  | 0.33  | 0.42 |
| -4 | -18 | 3  | 0.00  | 0.26 |
| -1 | -19 | 7  | 0.32  | 0.32 |
| -2 | -20 | 3  | 0.84  | 0.31 |
| -5 | -6  | 13 | 0.19  | 0.28 |
| -3 | -17 | 8  | 1.74  | 0.42 |
| -7 | -6  | 8  | 0.10  | 0.43 |
| -2 | -13 | 13 | -0.10 | 0.40 |
| -6 | -6  | 11 | 3.41  | 0.56 |
| -1 | -15 | 12 | 2.99  | 0.51 |
| -6 | -2  | 12 | 0.92  | 0.30 |
| -1 | -17 | 10 | 0.40  | 0.40 |
| -1 | -4  | 17 | -0.10 | 0.21 |
| 0  | -14 | 13 | 3.46  | 0.49 |
| -3 | -10 | 14 | 0.10  | 0.26 |
| -1 | -8  | 16 | -0.47 | 0.41 |
| -8 | -6  | 0  | 0.33  | 0.56 |
| 0  | -21 | 0  | -0.10 | 0.34 |
| -8 | 0   | 5  | 0.20  | 0.20 |
| -3 | -19 | 4  | 1.45  | 0.34 |
| 0  | -18 | 9  | 4.04  | 0.50 |
| -6 | -11 | 8  | -0.42 | 0.53 |
| -5 | 0   | 14 | 0.19  | 0.22 |
| -4 | -14 | 10 | 0.20  | 0.38 |
| -8 | -1  | 5  | -0.20 | 0.53 |
| -2 | -18 | 8  | 0.11  | 0.28 |
| -4 | -17 | 6  | 0.11  | 0.40 |
| -8 | -6  | 1  | 0.00  | 0.66 |

|    |     |    |       |      |
|----|-----|----|-------|------|
| -6 | -12 | 7  | -0.22 | 0.62 |
| 0  | -21 | 1  | 0.10  | 0.46 |
| -5 | -1  | 14 | 0.28  | 0.23 |
| -1 | -20 | 5  | -0.44 | 0.41 |
| -4 | -4  | 15 | 0.57  | 0.52 |
| -8 | -5  | 3  | 0.00  | 0.38 |
| 0  | -5  | 17 | 0.00  | 0.33 |
| -7 | -9  | 6  | 1.23  | 0.34 |
| -3 | -4  | 16 | 0.28  | 0.28 |
| -7 | -4  | 9  | -0.20 | 0.31 |
| -2 | 0   | 17 | 0.09  | 0.25 |
| -4 | -15 | 9  | 0.21  | 0.29 |
| -8 | -4  | 4  | 1.43  | 0.42 |
| -7 | -11 | 3  | 0.55  | 0.45 |
| -5 | -13 | 9  | -0.31 | 0.40 |
| -2 | -1  | 17 | 0.09  | 0.41 |
| -2 | -7  | 16 | -0.67 | 0.46 |
| -7 | -8  | 7  | 0.16  | 0.20 |
| -6 | -10 | 9  | 2.08  | 0.35 |
| -6 | -3  | 12 | 0.44  | 0.23 |
| -8 | -2  | 5  | 2.41  | 0.48 |
| -4 | -13 | 11 | -0.40 | 0.37 |
| -3 | -12 | 13 | 0.10  | 0.43 |
| -5 | -2  | 14 | 0.29  | 0.29 |
| -4 | -10 | 13 | 2.57  | 0.46 |
| -7 | -10 | 5  | 0.33  | 0.43 |
| 0  | -11 | 15 | -0.10 | 0.32 |
| -3 | -8  | 15 | 0.39  | 0.18 |
| -8 | -6  | 2  | -0.34 | 0.52 |
| 0  | -21 | 2  | -1.07 | 0.61 |
| -5 | -14 | 8  | 0.11  | 0.39 |
| -6 | -14 | 4  | 0.56  | 0.65 |
| -5 | -12 | 10 | -0.10 | 0.42 |
| -1 | -14 | 13 | 0.20  | 0.37 |
| -2 | -2  | 17 | 0.67  | 0.32 |
| -5 | -17 | 0  | -0.84 | 0.55 |
| -1 | -21 | 0  | 0.00  | 0.44 |
| -5 | -9  | 12 | 0.54  | 0.32 |
| -1 | -18 | 9  | 0.00  | 0.36 |
| -4 | -18 | 4  | -0.22 | 0.51 |
| -2 | -20 | 4  | 1.85  | 0.41 |
| -5 | -17 | 1  | 5.04  | 0.55 |
| -4 | -8  | 14 | 2.23  | 0.48 |
| -1 | -21 | 1  | 3.31  | 0.61 |
| -6 | -13 | 6  | -0.44 | 0.41 |
| -1 | -5  | 17 | 1.24  | 0.45 |
| -4 | -16 | 8  | -0.44 | 0.49 |
| -8 | -3  | 5  | -0.10 | 0.34 |
| -5 | -16 | 5  | -0.22 | 0.44 |
| -5 | -3  | 14 | 1.37  | 0.35 |
| -2 | -10 | 15 | 0.99  | 0.33 |
| 0  | -9  | 16 | 0.00  | 0.33 |
| -7 | -7  | 8  | 1.33  | 0.45 |
| -6 | -7  | 11 | -0.90 | 0.57 |
| -4 | -5  | 15 | -0.30 | 0.45 |
| -5 | -7  | 13 | 0.50  | 0.41 |
| -3 | -18 | 7  | -0.56 | 0.48 |
| -7 | -5  | 9  | 0.30  | 0.30 |

|    |     |    |       |      |
|----|-----|----|-------|------|
| -6 | -4  | 12 | 0.10  | 0.43 |
| 0  | -20 | 6  | 0.33  | 0.51 |
| -2 | -3  | 17 | -0.49 | 0.42 |
| -3 | -5  | 16 | 0.00  | 0.24 |
| 0  | -13 | 14 | 0.00  | 0.42 |
| -6 | -15 | 0  | -0.10 | 0.35 |
| -2 | -12 | 14 | -0.11 | 0.59 |
| -1 | -11 | 15 | 3.82  | 0.48 |
| -5 | -17 | 2  | 0.11  | 0.46 |
| -8 | -5  | 4  | -0.22 | 0.44 |
| -1 | -21 | 2  | 0.00  | 0.26 |
| -6 | -9  | 10 | 0.31  | 0.39 |
| -4 | -12 | 12 | 2.21  | 0.40 |
| 0  | -19 | 8  | 0.10  | 0.46 |
| -8 | -6  | 3  | 0.96  | 0.46 |
| -8 | -7  | 0  | 0.11  | 0.39 |
| -5 | -15 | 7  | 0.17  | 0.21 |
| 0  | -21 | 3  | 0.22  | 0.31 |
| -7 | -12 | 0  | 0.32  | 0.26 |
| 0  | -6  | 17 | 0.19  | 0.27 |
| -7 | -11 | 4  | 1.64  | 0.45 |
| -5 | -11 | 11 | -0.10 | 0.48 |
| -6 | -15 | 1  | -0.64 | 0.45 |
| -3 | -19 | 5  | 0.66  | 0.47 |
| -7 | 0   | 10 | -0.39 | 0.56 |
| -8 | -7  | 1  | -0.33 | 0.43 |
| -7 | -12 | 1  | 0.00  | 0.27 |
| -7 | -1  | 10 | 0.60  | 0.27 |
| -2 | -16 | 11 | 0.56  | 0.27 |
| -8 | 0   | 6  | 0.51  | 0.42 |
| -3 | -20 | 0  | -0.42 | 0.39 |
| -8 | -4  | 5  | 0.42  | 0.42 |
| -3 | -15 | 11 | 0.10  | 0.37 |
| -2 | -19 | 7  | 0.11  | 0.40 |
| -5 | -4  | 14 | 0.10  | 0.36 |
| -1 | -9  | 16 | -0.20 | 0.20 |
| -3 | -16 | 10 | 0.00  | 0.51 |
| -8 | -1  | 6  | -0.31 | 0.53 |
| -3 | -20 | 1  | 0.10  | 0.38 |
| -6 | -15 | 2  | 0.22  | 0.31 |
| -7 | -2  | 10 | -0.10 | 0.41 |
| -2 | -15 | 12 | 0.10  | 0.27 |
| -1 | -20 | 6  | -0.34 | 0.52 |
| -1 | -13 | 14 | 0.20  | 0.29 |
| -2 | -17 | 10 | 0.52  | 0.21 |
| -2 | -4  | 17 | 0.10  | 0.26 |
| -2 | -8  | 16 | 2.93  | 0.41 |
| -8 | -7  | 2  | -0.23 | 0.45 |
| -7 | -12 | 2  | -0.44 | 0.56 |
| -1 | -19 | 8  | 4.40  | 0.54 |
| -6 | -14 | 5  | 3.46  | 0.61 |
| -1 | -6  | 17 | 0.39  | 0.31 |
| -5 | -17 | 3  | 2.83  | 0.45 |
| -1 | -21 | 3  | 1.75  | 0.39 |
| -8 | -2  | 6  | 0.31  | 0.31 |
| -6 | -5  | 12 | -0.71 | 0.48 |
| -4 | -17 | 7  | 0.34  | 0.19 |
| -3 | -14 | 12 | 0.26  | 0.24 |

|    |     |    |       |      |
|----|-----|----|-------|------|
| -2 | -20 | 5  | 0.67  | 0.36 |
| -4 | -18 | 5  | 1.07  | 0.31 |
| -3 | -11 | 14 | 1.72  | 0.34 |
| -7 | -9  | 7  | 0.64  | 0.45 |
| -7 | -10 | 6  | 0.11  | 0.40 |
| -4 | -19 | 0  | 0.32  | 0.41 |
| -4 | -6  | 15 | 1.05  | 0.36 |
| -3 | -20 | 2  | -0.21 | 0.43 |
| -7 | -6  | 9  | -0.31 | 0.40 |
| -3 | -17 | 9  | -0.22 | 0.43 |
| -3 | -6  | 16 | -0.10 | 0.32 |
| -3 | -9  | 15 | 2.59  | 0.38 |
| -7 | -3  | 10 | 2.27  | 0.38 |
| -4 | -19 | 1  | 0.32  | 0.19 |
| 0  | -17 | 11 | 0.31  | 0.31 |
| -8 | -6  | 4  | 0.00  | 0.39 |
| 0  | -21 | 4  | 0.00  | 0.28 |
| -6 | -12 | 8  | 0.44  | 0.44 |
| 0  | -16 | 12 | 0.61  | 0.50 |
| -6 | -15 | 3  | -0.33 | 0.33 |
| -4 | -9  | 14 | 0.10  | 0.37 |
| -2 | -14 | 13 | 1.89  | 0.42 |
| -8 | -5  | 5  | 0.00  | 0.23 |
| -8 | -3  | 6  | 0.41  | 0.41 |
| -6 | -11 | 9  | 0.26  | 0.22 |
| -5 | -16 | 6  | 0.46  | 0.46 |
| -2 | -21 | 0  | -0.42 | 0.40 |
| -5 | -10 | 12 | 0.31  | 0.18 |
| -5 | -5  | 14 | 0.21  | 0.67 |
| -5 | -8  | 13 | 0.51  | 0.42 |
| -7 | -8  | 8  | 0.42  | 0.33 |
| -2 | -18 | 9  | 1.97  | 0.44 |
| -4 | -11 | 13 | 0.00  | 0.25 |
| -6 | -8  | 11 | 0.52  | 0.30 |
| 0  | -7  | 17 | 0.19  | 0.28 |
| -7 | -12 | 3  | -0.56 | 0.63 |
| -8 | -7  | 3  | 0.35  | 0.35 |
| -7 | -11 | 5  | 0.23  | 0.58 |
| -6 | -13 | 7  | 0.00  | 0.39 |
| -2 | -21 | 1  | -1.29 | 0.59 |
| -4 | -19 | 2  | 0.11  | 0.28 |
| -2 | -5  | 17 | -0.39 | 0.44 |
| 0  | 0   | 18 | 4.80  | 0.61 |
| 0  | -18 | 10 | -0.10 | 0.23 |
| -8 | -8  | 0  | 2.55  | 0.46 |
| 0  | -1  | 18 | 0.44  | 0.25 |
| 0  | -12 | 15 | -0.30 | 0.58 |
| 0  | -15 | 13 | 0.10  | 0.14 |
| -3 | -20 | 3  | -0.33 | 0.33 |
| -3 | -19 | 6  | 1.27  | 0.48 |
| 0  | -10 | 16 | 0.40  | 0.40 |
| -1 | -17 | 11 | -0.10 | 0.50 |
| -3 | -13 | 13 | 0.00  | 0.25 |
| -8 | -8  | 1  | 0.28  | 0.23 |
| -5 | -17 | 4  | 0.00  | 0.39 |
| -1 | -21 | 4  | -0.56 | 0.68 |
| -7 | -4  | 10 | 0.21  | 0.29 |
| -1 | -16 | 12 | 0.21  | 0.29 |

|    |     |    |       |      |
|----|-----|----|-------|------|
| -4 | -15 | 10 | 0.32  | 0.41 |
| 0  | -20 | 7  | 1.24  | 0.47 |
| -5 | -14 | 9  | -1.31 | 0.71 |
| -4 | 0   | 16 | 4.73  | 0.66 |
| -2 | -11 | 15 | -0.31 | 0.31 |
| -5 | -13 | 10 | 0.11  | 0.59 |
| -6 | -6  | 12 | 0.41  | 0.41 |
| -6 | 0   | 13 | 0.20  | 0.20 |
| -2 | -21 | 2  | 0.49  | 0.21 |
| -6 | -10 | 10 | -0.10 | 0.50 |
| -4 | -14 | 11 | 1.79  | 0.51 |
| -4 | -1  | 16 | -0.49 | 0.50 |
| 0  | -2  | 18 | 0.79  | 0.29 |
| -8 | -4  | 6  | 0.32  | 0.32 |
| -6 | -1  | 13 | 0.20  | 0.32 |
| -1 | -7  | 17 | 0.00  | 0.42 |
| -3 | -18 | 8  | -0.11 | 0.37 |
| -4 | -16 | 9  | 0.73  | 0.28 |
| -8 | -8  | 2  | 2.14  | 0.51 |
| -1 | 0   | 18 | -0.88 | 0.45 |
| -3 | 0   | 17 | -0.20 | 0.40 |
| -1 | -18 | 10 | -0.10 | 0.44 |
| -4 | -19 | 3  | 0.11  | 0.29 |
| -4 | -2  | 16 | 0.00  | 0.42 |
| -4 | -7  | 15 | 0.51  | 0.42 |
| -8 | 0   | 7  | 0.42  | 0.20 |
| -1 | -12 | 15 | 0.05  | 0.22 |
| -5 | -15 | 8  | 2.71  | 0.55 |
| -6 | -14 | 6  | 0.00  | 0.40 |
| -3 | -1  | 17 | 1.56  | 0.33 |
| -1 | -15 | 13 | 0.00  | 0.51 |
| -1 | -1  | 18 | 0.10  | 0.50 |
| -6 | -15 | 4  | 0.12  | 0.50 |
| -7 | -7  | 9  | 0.42  | 0.23 |
| -6 | -2  | 13 | 0.82  | 0.63 |
| -3 | -7  | 16 | 0.20  | 0.45 |
| -2 | -9  | 16 | -0.10 | 0.23 |
| -8 | -1  | 7  | -0.11 | 0.43 |
| -1 | -10 | 16 | 0.00  | 0.43 |
| -8 | -6  | 5  | 3.02  | 0.53 |
| -8 | -7  | 4  | 0.46  | 0.46 |
| -7 | -12 | 4  | 0.29  | 0.19 |
| -5 | -12 | 11 | -0.21 | 0.49 |
| -1 | -20 | 7  | 0.12  | 0.30 |
| -4 | -18 | 6  | 0.12  | 0.42 |
| 0  | -21 | 5  | -0.12 | 0.26 |
| -2 | -20 | 6  | 0.29  | 0.31 |
| -5 | -6  | 14 | -0.93 | 0.47 |
| 0  | -3  | 18 | 0.10  | 0.43 |
| -2 | -13 | 14 | 0.10  | 0.28 |
| 0  | -19 | 9  | 0.00  | 0.37 |
| -4 | -13 | 12 | -0.83 | 0.49 |
| -3 | -2  | 17 | 0.10  | 0.56 |
| -2 | -19 | 8  | 0.00  | 0.28 |
| -1 | -2  | 18 | 0.30  | 0.30 |
| -7 | -13 | 0  | -0.11 | 0.37 |
| -2 | -6  | 17 | -0.20 | 0.31 |
| 0  | -14 | 14 | 0.52  | 0.43 |



|    |     |    |       |      |
|----|-----|----|-------|------|
| -2 | -21 | 3  | 0.17  | 0.29 |
| -8 | -2  | 7  | 2.70  | 0.48 |
| -7 | -5  | 10 | 0.63  | 0.57 |
| -3 | -20 | 4  | 0.00  | 0.28 |
| -7 | -13 | 1  | 1.18  | 0.44 |
| -4 | -3  | 16 | 0.00  | 0.35 |
| -7 | -10 | 7  | -0.11 | 0.37 |
| -6 | -3  | 13 | 0.42  | 0.33 |
| -8 | -8  | 3  | 0.35  | 0.29 |
| -8 | -5  | 6  | -0.11 | 0.24 |
| 0  | -8  | 17 | 0.55  | 0.32 |
| -5 | -18 | 0  | 0.22  | 0.41 |
| -3 | -10 | 15 | 0.16  | 0.16 |
| -4 | -17 | 8  | 0.00  | 0.28 |
| -7 | -11 | 6  | 1.39  | 0.35 |
| -5 | -17 | 5  | 1.16  | 0.41 |
| -1 | -21 | 5  | 0.70  | 0.32 |
| -5 | 0   | 15 | -1.00 | 0.51 |
| -7 | -9  | 8  | 0.22  | 0.41 |
| -5 | -18 | 1  | -0.55 | 0.40 |
| -5 | -9  | 13 | 1.80  | 0.38 |
| -6 | -16 | 0  | 3.40  | 0.51 |
| -6 | -9  | 11 | -0.74 | 0.44 |
| -3 | -3  | 17 | 0.96  | 0.39 |
| -1 | -3  | 18 | 0.00  | 0.25 |
| 0  | -22 | 0  | 0.76  | 0.24 |
| -3 | -12 | 14 | 0.42  | 0.33 |
| -5 | -1  | 15 | 2.47  | 0.48 |
| -1 | -19 | 9  | -0.33 | 0.33 |
| 0  | -4  | 18 | 2.37  | 0.39 |
| -4 | -10 | 14 | 0.00  | 0.26 |
| -8 | -3  | 7  | 0.16  | 0.21 |
| -7 | -13 | 2  | 0.56  | 0.23 |
| -7 | 0   | 11 | -0.21 | 0.42 |
| -6 | -7  | 12 | -0.21 | 0.33 |
| -5 | -16 | 7  | -0.12 | 0.39 |
| -6 | -16 | 1  | 0.00  | 0.47 |
| 0  | -22 | 1  | -0.22 | 0.44 |
| -4 | -19 | 4  | 0.00  | 0.28 |
| -7 | -1  | 11 | -0.21 | 0.42 |
| -1 | -14 | 14 | -0.31 | 0.41 |
| -8 | -9  | 0  | 0.45  | 0.36 |
| -8 | -9  | 1  | 0.23  | 0.33 |
| -4 | -4  | 16 | 2.23  | 0.45 |
| -5 | -11 | 12 | 3.55  | 0.54 |
| -5 | -2  | 15 | -0.40 | 0.38 |
| -5 | -18 | 2  | 0.11  | 0.48 |
| -3 | -16 | 11 | -0.32 | 0.32 |
| -6 | -4  | 13 | 0.00  | 0.45 |
| -1 | -8  | 17 | 0.10  | 0.36 |
| -7 | -2  | 11 | 0.52  | 0.21 |
| -6 | -12 | 9  | 0.99  | 0.30 |
| -6 | -15 | 5  | 0.00  | 0.40 |
| -3 | -19 | 7  | -0.12 | 0.39 |
| -2 | -17 | 11 | 0.00  | 0.37 |
| -6 | -13 | 8  | 0.57  | 0.27 |
| -6 | -16 | 2  | 2.07  | 0.48 |
| -2 | -21 | 4  | 0.34  | 0.34 |

|    |     |    |       |      |
|----|-----|----|-------|------|
| -4 | -12 | 13 | 0.75  | 0.35 |
| -2 | -16 | 12 | 0.90  | 0.25 |
| 0  | -22 | 2  | 0.62  | 0.27 |
| -8 | -7  | 5  | 0.57  | 0.48 |
| -7 | -12 | 5  | -0.59 | 0.43 |
| -1 | -22 | 0  | -0.77 | 0.53 |
| -3 | -15 | 12 | 2.39  | 0.50 |
| -7 | -6  | 10 | -0.53 | 0.39 |
| -5 | -7  | 14 | 0.21  | 0.70 |
| -3 | -17 | 10 | -0.33 | 0.43 |
| -4 | -8  | 15 | -0.42 | 0.39 |
| -3 | -4  | 17 | -0.30 | 0.39 |
| -1 | -4  | 18 | 0.41  | 0.32 |
| -3 | -8  | 16 | 0.21  | 0.29 |
| -7 | -8  | 9  | 0.32  | 0.32 |
| 0  | -11 | 16 | 0.21  | 0.29 |
| -8 | -9  | 2  | 0.23  | 0.19 |
| -8 | -4  | 7  | 0.65  | 0.26 |
| -7 | -13 | 3  | 0.93  | 0.77 |
| -1 | -22 | 1  | 0.22  | 0.42 |
| -8 | -8  | 4  | 1.55  | 0.53 |
| -2 | -7  | 17 | 0.00  | 0.25 |
| -5 | -3  | 15 | 1.34  | 0.42 |
| 0  | -20 | 8  | 0.40  | 0.25 |
| -8 | -6  | 6  | -0.33 | 0.33 |
| -3 | -20 | 5  | 0.12  | 0.42 |
| 0  | -21 | 6  | -0.24 | 0.37 |
| -6 | -11 | 10 | -0.11 | 0.36 |
| 0  | -5  | 18 | -0.41 | 0.38 |
| -7 | -3  | 11 | 0.26  | 0.28 |
| -2 | -18 | 10 | -0.11 | 0.37 |
| -2 | 0   | 18 | 4.89  | 0.54 |
| -6 | -14 | 7  | 3.00  | 0.53 |
| 0  | -13 | 15 | 0.32  | 0.18 |
| -2 | -15 | 13 | 0.21  | 0.28 |
| -2 | -12 | 15 | 0.00  | 0.37 |
| -2 | -1  | 18 | -0.41 | 0.58 |
| -5 | -18 | 3  | -0.11 | 0.25 |
| -2 | -10 | 16 | 0.11  | 0.38 |
| -4 | -18 | 7  | 1.84  | 0.51 |
| -1 | -22 | 2  | 0.34  | 0.24 |
| -2 | -20 | 7  | 1.72  | 0.43 |
| -4 | -5  | 16 | 0.21  | 0.29 |
| -6 | -16 | 3  | 0.00  | 0.40 |
| -6 | -5  | 13 | 0.05  | 0.23 |
| 0  | -22 | 3  | 0.58  | 0.62 |
| -3 | -14 | 13 | -0.75 | 0.44 |
| 0  | -17 | 12 | -0.21 | 0.34 |
| -8 | 0   | 8  | -1.07 | 0.48 |
| -1 | -11 | 16 | -0.32 | 0.41 |
| -3 | -21 | 0  | 0.11  | 0.40 |
| -2 | -2  | 18 | -0.20 | 0.41 |
| -3 | -18 | 9  | -0.23 | 0.37 |
| -8 | -1  | 8  | 0.11  | 0.47 |
| -4 | -19 | 5  | 0.35  | 0.25 |
| -5 | -14 | 10 | -0.11 | 0.46 |
| -8 | -9  | 3  | -0.12 | 0.27 |
| 0  | -18 | 11 | 0.98  | 0.77 |

|    |     |    |       |      |
|----|-----|----|-------|------|
| 0  | -9  | 17 | -0.10 | 0.34 |
| -1 | -20 | 8  | -0.11 | 0.48 |
| -5 | -17 | 6  | 1.13  | 0.36 |
| -3 | -21 | 1  | 2.47  | 0.50 |
| -1 | -21 | 6  | -0.48 | 0.45 |
| -5 | -4  | 15 | -0.11 | 0.28 |
| -6 | -8  | 12 | 0.43  | 0.50 |
| -1 | -5  | 18 | 0.73  | 0.52 |
| -3 | -5  | 17 | 1.34  | 0.40 |
| -5 | -15 | 9  | 0.06  | 0.25 |
| 0  | -16 | 13 | 0.11  | 0.39 |
| -8 | -5  | 7  | 0.00  | 0.27 |
| -1 | -13 | 15 | 0.75  | 0.27 |
| -7 | -4  | 11 | -0.54 | 0.47 |
| -4 | -15 | 11 | 0.11  | 0.29 |
| -4 | -20 | 0  | 3.28  | 0.58 |
| -8 | -2  | 8  | -0.33 | 0.33 |
| -4 | -16 | 10 | 0.23  | 0.43 |
| -7 | -11 | 7  | 0.00  | 0.29 |
| -7 | -13 | 4  | 0.00  | 0.41 |
| -5 | -13 | 11 | -0.22 | 0.44 |
| -7 | -10 | 8  | -0.68 | 0.48 |
| -2 | -21 | 5  | 0.06  | 0.26 |
| -5 | -10 | 13 | -0.11 | 0.36 |
| -4 | -20 | 1  | 0.45  | 0.45 |
| -6 | -10 | 11 | 3.15  | 0.54 |
| -2 | -3  | 18 | 0.21  | 0.39 |
| -1 | -22 | 3  | 0.46  | 0.46 |
| -2 | -19 | 9  | 0.47  | 0.47 |
| -3 | -11 | 15 | 0.65  | 0.70 |
| -1 | -17 | 12 | 0.11  | 0.39 |
| -7 | -7  | 10 | 0.76  | 0.66 |
| -3 | -21 | 2  | -0.34 | 0.44 |
| 0  | -6  | 18 | -0.10 | 0.35 |
| -6 | -15 | 6  | -0.36 | 0.55 |
| -2 | -14 | 14 | 0.33  | 0.23 |
| -8 | -10 | 0  | 0.35  | 0.45 |
| -8 | -8  | 5  | -0.24 | 0.56 |
| -5 | -18 | 4  | 0.00  | 0.50 |
| -1 | -9  | 17 | 3.49  | 0.50 |
| -1 | -18 | 11 | -1.10 | 0.49 |
| -4 | -14 | 12 | -0.44 | 0.49 |
| -5 | -8  | 14 | 0.27  | 0.26 |
| 0  | -19 | 10 | -0.55 | 0.40 |
| -4 | -11 | 14 | -0.22 | 0.44 |
| -7 | -14 | 0  | 0.28  | 0.23 |
| -8 | -7  | 6  | -0.69 | 0.63 |
| -7 | -12 | 6  | 0.24  | 0.45 |
| -8 | -10 | 1  | 0.00  | 0.25 |
| -8 | -3  | 8  | 0.11  | 0.40 |
| -5 | -16 | 8  | 0.48  | 0.48 |
| -1 | -16 | 13 | 0.22  | 0.31 |
| -6 | -16 | 4  | 0.35  | 0.68 |
| -4 | -20 | 2  | 2.45  | 0.60 |
| 0  | -22 | 4  | 0.24  | 0.44 |
| -4 | -17 | 9  | 0.47  | 0.22 |
| -7 | -14 | 1  | 0.00  | 0.28 |
| -2 | -8  | 17 | 0.10  | 0.38 |

|    |     |    |       |      |
|----|-----|----|-------|------|
| -4 | -6  | 16 | -0.11 | 0.35 |
| -4 | -9  | 15 | 0.11  | 0.29 |
| -6 | -6  | 13 | 2.38  | 0.43 |
| -3 | -9  | 16 | 0.11  | 0.47 |
| -7 | -9  | 9  | 0.45  | 0.35 |
| -5 | -5  | 15 | 1.07  | 0.36 |
| 0  | -15 | 14 | -0.43 | 0.48 |
| -3 | -20 | 6  | 0.00  | 0.29 |
| -8 | -9  | 4  | 0.49  | 0.39 |
| -2 | -22 | 0  | 0.68  | 0.48 |
| -3 | -13 | 14 | 0.00  | 0.27 |
| -2 | -4  | 18 | 1.68  | 0.41 |
| -7 | -5  | 11 | 0.32  | 0.42 |
| -5 | -12 | 12 | 0.00  | 0.38 |
| -8 | -10 | 2  | -0.24 | 0.38 |
| -3 | -19 | 8  | 1.50  | 0.47 |
| -2 | -22 | 1  | -0.68 | 0.48 |
| -3 | -21 | 3  | 0.69  | 0.47 |
| -3 | -6  | 17 | -0.84 | 0.42 |
| -1 | -6  | 18 | 0.21  | 0.39 |
| -6 | 0   | 14 | 2.88  | 0.58 |
| -8 | -6  | 7  | 1.86  | 0.42 |
| 0  | -21 | 7  | -0.48 | 0.45 |
| -7 | -14 | 2  | 0.35  | 0.35 |
| -1 | -19 | 10 | 1.88  | 0.43 |
| -6 | -1  | 14 | -0.21 | 0.34 |
| -9 | 0   | 0  | 0.81  | 0.27 |
| -8 | -4  | 8  | -0.22 | 0.45 |
| -1 | -22 | 4  | -0.47 | 0.44 |
| -9 | -1  | 0  | 0.37  | 0.37 |
| -6 | -13 | 9  | 0.70  | 0.25 |
| -9 | 0   | 1  | 0.37  | 0.48 |
| -4 | -20 | 3  | -0.12 | 0.38 |
| 0  | -12 | 16 | 2.25  | 0.47 |
| -4 | -19 | 6  | -0.12 | 0.40 |
| -4 | -13 | 13 | 0.27  | 0.23 |
| -9 | -1  | 1  | 1.50  | 0.49 |
| -1 | -15 | 14 | 0.77  | 0.55 |
| -6 | -2  | 14 | -0.43 | 0.40 |
| -2 | -22 | 2  | 0.87  | 0.30 |
| -7 | -13 | 5  | 0.12  | 0.53 |
| -6 | -14 | 8  | 0.36  | 0.21 |
| -6 | -12 | 10 | 0.34  | 0.34 |
| -9 | -2  | 0  | 0.49  | 0.28 |
| -2 | -11 | 16 | -0.22 | 0.44 |
| -6 | -17 | 0  | -0.23 | 0.46 |
| -6 | -9  | 12 | 0.33  | 0.43 |
| 0  | -20 | 9  | 2.10  | 0.49 |
| 0  | -7  | 18 | -0.74 | 0.57 |
| -9 | -2  | 1  | -0.75 | 0.62 |
| -4 | -18 | 8  | 0.49  | 0.39 |
| -8 | -10 | 3  | 1.04  | 0.29 |
| -5 | -17 | 7  | 0.55  | 0.32 |
| -2 | -20 | 8  | 0.18  | 0.24 |
| 0  | -10 | 17 | 0.32  | 0.32 |
| -6 | -17 | 1  | 0.00  | 0.28 |
| -9 | 0   | 2  | 0.00  | 0.29 |
| -1 | -21 | 7  | 0.24  | 0.55 |

|    |     |    |       |      |
|----|-----|----|-------|------|
| -7 | 0   | 12 | 0.11  | 0.29 |
| -2 | -21 | 6  | -0.24 | 0.57 |
| -5 | -18 | 5  | -0.12 | 0.27 |
| -7 | -8  | 10 | 0.00  | 0.27 |
| -2 | -5  | 18 | 0.00  | 0.37 |
| -7 | -14 | 3  | 0.00  | 0.42 |
| -5 | -19 | 0  | -1.26 | 0.64 |
| -9 | -1  | 2  | 0.67  | 0.33 |
| -4 | 0   | 17 | -0.32 | 0.49 |
| -7 | -1  | 12 | 0.00  | 0.47 |
| -5 | -6  | 15 | -0.11 | 0.45 |
| -2 | -13 | 15 | 0.00  | 0.23 |
| -6 | -16 | 5  | 0.36  | 0.36 |
| -4 | -1  | 17 | 0.00  | 0.52 |
| -6 | -3  | 14 | 0.33  | 0.42 |
| 0  | -22 | 5  | 1.78  | 0.49 |
| -4 | -7  | 16 | 0.22  | 0.31 |
| -1 | -12 | 16 | -0.22 | 0.22 |
| -5 | -19 | 1  | 0.00  | 0.57 |
| -3 | -17 | 11 | -0.34 | 0.52 |
| -8 | -8  | 6  | 0.83  | 0.60 |
| -7 | -6  | 11 | 0.00  | 0.38 |
| -6 | -7  | 13 | -0.45 | 0.50 |
| -3 | -21 | 4  | 0.42  | 0.21 |
| -3 | -16 | 12 | -0.89 | 0.45 |
| -9 | -3  | 0  | 0.49  | 0.27 |
| 0  | -14 | 15 | 0.72  | 0.31 |
| -8 | 0   | 9  | 0.11  | 0.29 |
| -8 | -9  | 5  | -0.13 | 0.41 |
| -9 | -2  | 2  | 0.37  | 0.21 |
| 0  | 0   | 19 | -0.11 | 0.24 |
| -7 | -2  | 12 | -0.06 | 0.26 |
| -2 | -22 | 3  | 0.59  | 0.48 |
| -8 | -5  | 8  | 0.11  | 0.30 |
| -6 | -17 | 2  | -0.47 | 0.44 |
| -5 | -9  | 14 | -0.23 | 0.52 |
| -2 | -17 | 12 | -0.78 | 0.54 |
| -9 | -3  | 1  | 0.51  | 0.59 |
| -8 | -1  | 9  | 0.22  | 0.31 |
| -4 | -2  | 17 | 0.69  | 0.23 |
| 0  | -1  | 19 | -0.11 | 0.35 |
| -1 | -20 | 9  | -0.48 | 0.45 |
| -5 | -11 | 13 | 0.22  | 0.42 |
| -7 | -11 | 8  | 0.83  | 0.59 |
| -6 | -15 | 7  | -0.62 | 0.45 |
| -6 | -11 | 11 | 0.17  | 0.26 |
| -1 | -7  | 18 | -0.11 | 0.35 |
| -3 | -7  | 17 | 0.64  | 0.52 |
| -1 | -10 | 17 | 0.43  | 0.34 |
| -2 | -18 | 11 | 0.80  | 0.57 |
| -2 | -9  | 17 | 0.00  | 0.26 |
| -4 | -20 | 4  | 0.71  | 0.65 |
| -8 | -7  | 7  | 0.00  | 0.40 |
| -7 | -12 | 7  | 0.00  | 0.52 |
| -5 | -19 | 2  | -0.24 | 0.47 |
| -9 | 0   | 3  | -0.35 | 0.45 |
| -3 | 0   | 18 | -0.11 | 0.35 |
| -3 | -18 | 10 | 0.00  | 0.29 |

|    |     |    |       |      |
|----|-----|----|-------|------|
| -8 | -11 | 0  | 0.12  | 0.31 |
| -2 | -16 | 13 | -0.22 | 0.45 |
| 0  | -2  | 19 | -0.32 | 0.41 |
| -8 | -2  | 9  | 2.44  | 0.48 |
| -3 | -1  | 18 | -0.11 | 0.52 |
| -3 | -15 | 13 | -0.11 | 0.46 |
| -9 | -1  | 3  | 0.48  | 0.38 |
| -1 | -22 | 5  | 0.24  | 0.46 |
| -3 | -12 | 15 | 0.22  | 0.32 |
| -4 | -10 | 15 | 0.11  | 0.56 |
| -9 | -3  | 2  | -0.37 | 0.49 |
| -7 | -10 | 9  | -0.24 | 0.47 |
| -3 | -10 | 16 | -0.11 | 0.37 |
| -8 | -11 | 1  | -0.60 | 0.53 |
| -7 | -3  | 12 | 0.44  | 0.59 |
| -6 | -4  | 14 | 0.94  | 0.38 |
| -5 | -15 | 10 | 2.25  | 0.53 |
| -1 | -14 | 15 | -0.56 | 0.49 |
| -8 | -10 | 4  | 0.25  | 0.47 |
| -3 | -20 | 7  | 0.25  | 0.46 |
| -4 | -3  | 17 | -0.11 | 0.51 |
| -5 | 0   | 16 | -0.54 | 0.54 |
| -9 | -4  | 0  | -0.61 | 0.44 |
| -1 | 0   | 19 | 0.11  | 0.28 |
| -4 | -12 | 14 | 0.90  | 0.51 |
| 0  | -23 | 0  | -0.23 | 0.36 |
| -7 | -14 | 4  | -0.49 | 0.55 |
| -5 | -14 | 11 | 0.46  | 0.36 |
| -9 | -2  | 3  | 0.00  | 0.30 |
| -1 | -1  | 19 | 0.96  | 0.37 |
| -5 | -1  | 16 | 0.48  | 0.34 |
| -3 | -2  | 18 | 0.22  | 0.17 |
| -9 | -4  | 1  | -0.12 | 0.42 |
| -6 | -17 | 3  | 0.00  | 0.51 |
| -2 | -6  | 18 | -0.21 | 0.43 |
| 0  | -23 | 1  | -0.12 | 0.39 |
| -7 | -13 | 6  | 0.00  | 0.31 |
| 0  | -3  | 19 | 0.32  | 0.32 |
| -8 | -3  | 9  | -0.22 | 0.36 |
| -2 | -19 | 10 | 0.36  | 0.46 |
| -5 | -16 | 9  | -0.37 | 0.64 |
| -8 | -11 | 2  | -0.60 | 0.44 |
| -4 | -16 | 11 | 1.28  | 0.31 |
| -5 | -19 | 3  | 0.00  | 0.41 |
| 0  | -18 | 12 | -0.45 | 0.50 |
| -5 | -2  | 16 | -0.11 | 0.36 |
| -5 | -7  | 15 | 0.45  | 0.45 |
| -1 | -2  | 19 | -1.08 | 0.55 |
| -2 | -22 | 4  | 0.12  | 0.32 |
| 0  | -8  | 18 | 4.91  | 0.66 |
| -4 | -19 | 7  | -0.75 | 0.43 |
| -8 | -6  | 8  | 0.40  | 0.25 |
| 0  | -21 | 8  | -1.10 | 0.56 |
| 0  | -17 | 13 | 0.34  | 0.44 |
| -2 | -15 | 14 | 0.34  | 0.34 |
| -7 | -7  | 11 | 0.11  | 0.30 |
| -3 | -21 | 5  | 0.12  | 0.44 |
| -9 | -4  | 2  | 0.51  | 0.40 |

|    |     |    |       |      |
|----|-----|----|-------|------|
| -5 | -18 | 6  | 0.50  | 0.39 |
| -7 | -4  | 12 | 0.22  | 0.32 |
| -9 | -3  | 3  | -0.62 | 0.62 |
| -3 | -3  | 18 | -0.11 | 0.24 |
| -4 | -15 | 12 | 0.34  | 0.34 |
| -4 | -17 | 10 | 0.00  | 0.30 |
| 0  | -23 | 2  | -0.48 | 0.61 |
| -7 | -15 | 0  | 0.29  | 0.20 |
| -4 | -4  | 17 | -0.33 | 0.42 |
| -3 | -19 | 9  | -0.37 | 0.37 |
| -1 | -23 | 0  | -0.23 | 0.47 |
| -5 | -13 | 12 | 0.23  | 0.51 |
| -4 | -8  | 16 | 1.73  | 0.46 |
| -7 | -9  | 10 | -0.69 | 0.63 |
| -9 | 0   | 4  | -0.11 | 0.26 |
| -6 | -16 | 6  | 0.25  | 0.35 |
| -6 | -10 | 12 | 0.34  | 0.44 |
| 0  | -22 | 6  | 0.38  | 0.49 |
| 0  | -19 | 11 | -0.46 | 0.43 |
| -6 | -8  | 13 | -0.69 | 0.48 |
| -6 | -5  | 14 | -0.57 | 0.63 |
| -7 | -15 | 1  | 0.35  | 0.46 |
| -3 | -14 | 14 | -0.11 | 0.38 |
| -9 | -1  | 4  | -0.58 | 0.51 |
| -1 | -23 | 1  | 0.12  | 0.31 |
| -9 | -5  | 0  | 0.00  | 0.43 |
| -2 | -21 | 7  | 0.12  | 0.45 |
| -5 | -3  | 16 | 0.22  | 0.41 |
| -1 | -3  | 19 | 1.41  | 0.36 |
| -4 | -20 | 5  | 0.67  | 0.29 |
| -8 | -9  | 6  | -0.12 | 0.41 |
| -8 | -4  | 9  | -0.91 | 0.53 |
| 0  | -4  | 19 | -0.65 | 0.46 |
| -1 | -18 | 12 | -0.11 | 0.26 |
| -9 | -5  | 1  | 1.02  | 0.37 |
| -3 | -8  | 17 | -0.33 | 0.43 |
| -8 | -11 | 3  | 0.00  | 0.30 |
| 0  | -11 | 17 | 0.22  | 0.31 |
| -1 | -8  | 18 | -0.33 | 0.33 |
| 0  | -13 | 16 | -0.34 | 0.44 |
| 0  | -16 | 14 | 0.79  | 0.63 |
| -9 | -2  | 4  | 0.54  | 0.23 |
| -2 | -12 | 16 | 1.58  | 0.45 |
| -8 | -8  | 7  | -0.84 | 0.57 |
| -1 | -17 | 13 | 1.59  | 0.51 |
| -5 | -17 | 8  | 1.25  | 0.39 |
| -6 | -17 | 4  | -0.12 | 0.27 |
| -1 | -21 | 8  | -0.25 | 0.39 |
| -7 | -15 | 2  | -0.36 | 0.46 |
| -6 | -14 | 9  | 2.27  | 0.53 |
| -8 | -10 | 5  | 0.26  | 0.47 |
| -3 | -22 | 0  | -0.12 | 0.39 |
| -1 | -23 | 2  | -0.60 | 0.67 |
| -6 | -13 | 10 | 0.12  | 0.43 |
| -3 | -4  | 18 | 0.33  | 0.23 |
| -9 | -4  | 3  | -0.38 | 0.58 |
| -4 | -14 | 13 | 1.42  | 0.42 |
| -5 | -10 | 14 | 0.11  | 0.21 |

|    |     |    |       |      |
|----|-----|----|-------|------|
| -7 | -14 | 5  | 0.44  | 0.35 |
| 0  | -23 | 3  | 0.24  | 0.34 |
| -5 | -19 | 4  | -0.25 | 0.71 |
| -1 | -19 | 11 | 0.35  | 0.35 |
| -4 | -21 | 0  | -0.12 | 0.48 |
| -4 | -18 | 9  | 1.74  | 0.47 |
| -3 | -22 | 1  | 0.00  | 0.41 |
| -1 | -22 | 6  | 0.50  | 0.40 |
| -2 | -20 | 9  | 0.74  | 0.61 |
| -2 | -7  | 18 | 0.38  | 0.24 |
| -9 | -5  | 2  | 0.77  | 0.55 |
| -7 | -5  | 12 | 0.85  | 0.35 |
| -2 | -10 | 17 | 0.22  | 0.31 |
| -4 | -21 | 1  | -0.12 | 0.39 |
| -4 | -5  | 17 | 0.00  | 0.27 |
| -5 | -4  | 16 | -0.33 | 0.43 |
| -1 | -4  | 19 | -0.44 | 0.41 |
| 0  | -20 | 10 | 0.12  | 0.43 |
| -9 | -3  | 4  | 0.68  | 0.39 |
| -1 | -11 | 17 | 1.72  | 0.46 |
| -6 | -15 | 8  | 0.50  | 0.40 |
| -2 | -22 | 5  | 0.99  | 0.39 |
| -1 | -13 | 16 | 0.23  | 0.43 |
| -1 | -16 | 14 | 0.00  | 0.40 |
| -7 | -12 | 8  | -0.99 | 0.49 |
| -5 | -12 | 13 | 0.11  | 0.30 |
| -8 | -7  | 8  | 0.00  | 0.41 |
| -2 | -14 | 15 | 0.34  | 0.32 |
| -3 | -22 | 2  | -0.24 | 0.56 |
| -6 | -12 | 11 | 0.23  | 0.52 |
| -8 | -5  | 9  | -0.11 | 0.38 |
| 0  | -5  | 19 | -0.11 | 0.37 |
| -6 | -6  | 14 | 0.45  | 0.61 |
| -2 | 0   | 19 | 0.27  | 0.18 |
| -5 | -8  | 15 | -0.35 | 0.45 |
| -4 | -11 | 15 | 0.06  | 0.15 |
| -4 | -21 | 2  | 0.24  | 0.45 |
| -7 | -15 | 3  | -0.24 | 0.39 |
| -7 | -11 | 9  | 0.12  | 0.43 |
| -3 | -11 | 16 | -0.12 | 0.26 |
| -1 | -23 | 3  | 0.00  | 0.30 |
| -2 | -1  | 19 | 0.44  | 0.21 |
| -9 | -6  | 0  | -0.25 | 0.50 |
| -9 | 0   | 5  | 0.23  | 0.33 |
| -8 | -12 | 0  | 1.46  | 0.36 |
| -7 | -8  | 11 | -0.23 | 0.46 |
| -8 | -11 | 4  | -0.38 | 0.49 |
| -3 | -20 | 8  | 0.00  | 0.31 |
| -9 | -1  | 5  | 0.35  | 0.45 |
| -8 | 0   | 10 | 0.11  | 0.41 |
| 0  | -9  | 18 | -0.22 | 0.22 |
| -7 | -13 | 7  | -0.75 | 0.62 |
| -9 | -6  | 1  | 0.51  | 0.24 |
| -3 | -21 | 6  | 0.38  | 0.38 |
| -9 | -5  | 3  | 0.52  | 0.43 |
| -8 | -12 | 1  | 0.25  | 0.35 |
| -3 | -5  | 18 | 0.66  | 0.23 |
| -8 | -1  | 10 | 0.00  | 0.39 |



|    |     |    |       |      |
|----|-----|----|-------|------|
| 0  | -15 | 15 | 0.11  | 0.30 |
| -1 | -20 | 10 | 0.12  | 0.44 |
| -3 | -13 | 15 | 0.00  | 0.40 |
| -2 | -2  | 19 | 0.11  | 0.29 |
| -9 | -4  | 4  | -0.12 | 0.52 |
| -6 | -18 | 0  | 0.89  | 0.34 |
| 0  | -23 | 4  | 0.00  | 0.31 |
| -4 | -9  | 16 | 0.00  | 0.28 |
| -9 | -2  | 5  | -0.47 | 0.53 |
| -6 | -17 | 5  | -0.37 | 0.38 |
| -5 | -18 | 7  | 0.25  | 0.36 |
| -6 | 0   | 15 | 0.11  | 0.29 |
| -6 | -9  | 13 | -0.11 | 0.48 |
| -4 | -20 | 6  | 0.38  | 0.31 |
| -6 | -18 | 1  | 0.00  | 0.51 |
| -8 | -2  | 10 | -0.80 | 0.55 |
| -5 | -5  | 16 | 0.22  | 0.42 |
| -1 | -5  | 19 | 1.00  | 0.41 |
| -4 | -13 | 14 | 0.23  | 0.23 |
| -6 | -1  | 15 | 0.00  | 0.27 |
| -9 | -6  | 2  | -0.26 | 0.41 |
| -3 | -22 | 3  | -0.37 | 0.47 |
| -2 | -23 | 0  | -0.24 | 0.38 |
| -7 | -6  | 12 | -0.11 | 0.38 |
| -3 | -17 | 12 | 0.35  | 0.46 |
| -7 | 0   | 13 | 0.45  | 0.45 |
| -6 | -16 | 7  | -0.38 | 0.50 |
| -7 | -10 | 10 | 0.71  | 0.25 |
| -8 | -12 | 2  | 1.18  | 0.38 |
| -4 | -19 | 8  | 0.00  | 0.31 |
| 0  | -22 | 7  | 1.99  | 0.50 |
| -4 | -6  | 17 | 0.22  | 0.32 |
| -7 | -1  | 13 | 0.80  | 0.40 |
| -5 | -19 | 5  | -0.13 | 0.42 |
| -4 | -21 | 3  | -0.37 | 0.47 |
| -2 | -23 | 1  | -0.24 | 0.38 |
| -3 | -18 | 11 | 0.12  | 0.32 |
| -1 | -9  | 18 | 0.33  | 0.33 |
| -3 | -9  | 17 | 2.37  | 0.48 |
| -2 | -3  | 19 | -0.34 | 0.34 |
| -8 | -9  | 7  | 0.63  | 0.51 |
| -8 | -10 | 6  | -0.13 | 0.42 |
| -1 | -15 | 15 | -0.23 | 0.37 |
| -6 | -11 | 12 | -0.23 | 0.46 |
| -6 | -2  | 15 | 0.23  | 0.30 |
| -3 | -16 | 13 | -0.47 | 0.44 |
| -9 | -3  | 5  | -0.06 | 0.44 |
| -6 | -18 | 2  | 0.86  | 0.61 |
| -2 | -18 | 12 | 0.35  | 0.36 |
| -2 | -8  | 18 | 3.34  | 0.60 |
| -8 | -6  | 9  | 1.47  | 0.41 |
| 0  | -21 | 9  | -0.25 | 0.35 |
| -5 | -15 | 11 | 0.24  | 0.34 |
| 0  | -6  | 19 | -0.34 | 0.58 |
| -7 | -15 | 4  | 0.51  | 0.42 |
| -7 | -14 | 6  | -0.39 | 0.50 |
| -5 | -20 | 0  | -0.24 | 0.48 |
| -7 | -2  | 13 | -0.58 | 0.42 |

|    |     |    |       |      |
|----|-----|----|-------|------|
| -8 | -3  | 10 | -0.11 | 0.38 |
| -1 | -23 | 4  | 1.49  | 0.40 |
| -5 | -16 | 10 | -0.37 | 0.65 |
| -2 | -17 | 13 | -0.12 | 0.26 |
| -2 | -21 | 8  | -0.13 | 0.29 |
| -5 | -20 | 1  | -0.36 | 0.47 |
| -6 | -7  | 14 | -0.93 | 0.62 |
| -2 | -23 | 2  | -0.25 | 0.49 |
| -9 | -5  | 4  | -0.51 | 0.73 |
| -9 | -7  | 0  | 0.44  | 0.23 |
| -9 | -6  | 3  | 0.26  | 0.37 |
| -2 | -19 | 11 | 0.24  | 0.35 |
| -8 | -8  | 8  | -0.12 | 0.50 |
| -1 | -22 | 7  | 0.13  | 0.34 |
| -3 | -6  | 18 | 0.34  | 0.19 |
| -2 | -22 | 6  | 0.25  | 0.36 |
| 0  | -12 | 17 | -0.69 | 0.56 |
| -8 | -12 | 3  | 0.26  | 0.43 |
| -8 | -11 | 5  | 0.00  | 0.45 |
| -6 | -3  | 15 | 0.00  | 0.40 |
| -5 | -14 | 12 | 0.00  | 0.29 |
| -5 | -11 | 14 | 0.77  | 0.33 |
| -3 | -19 | 10 | 0.63  | 0.52 |
| -9 | -7  | 1  | 0.00  | 0.45 |
| -7 | -3  | 13 | 0.35  | 0.45 |
| -2 | -4  | 19 | 0.11  | 0.30 |
| -5 | -20 | 2  | -0.24 | 0.24 |
| -3 | -22 | 4  | -0.38 | 0.48 |
| -2 | -11 | 17 | 0.23  | 0.43 |
| -5 | -6  | 16 | 0.29  | 0.28 |
| -5 | -17 | 9  | -0.51 | 0.48 |
| -5 | -9  | 15 | 0.48  | 0.55 |
| -9 | -4  | 5  | -0.99 | 0.58 |
| -2 | -13 | 16 | 0.12  | 0.22 |
| -9 | 0   | 6  | 0.59  | 0.24 |
| -1 | -6  | 19 | 0.00  | 0.48 |
| -1 | -21 | 9  | 0.38  | 0.38 |
| -2 | -16 | 14 | 0.47  | 0.55 |
| -6 | -18 | 3  | -0.25 | 0.39 |
| -4 | -17 | 11 | -0.12 | 0.28 |
| 0  | -23 | 5  | 0.26  | 0.36 |
| -9 | -1  | 6  | -0.59 | 0.66 |
| -4 | -21 | 4  | -0.12 | 0.51 |
| -8 | -4  | 10 | -0.59 | 0.51 |
| -3 | -15 | 14 | 0.59  | 0.49 |
| -4 | -16 | 12 | 0.60  | 0.49 |
| -7 | -16 | 0  | 0.12  | 0.44 |
| -7 | -9  | 11 | 0.59  | 0.56 |
| 0  | -14 | 16 | 0.35  | 0.35 |
| -9 | -7  | 2  | 0.13  | 0.35 |
| -7 | -7  | 12 | -0.12 | 0.49 |
| -2 | -23 | 3  | -0.13 | 0.28 |
| -7 | -16 | 1  | -0.12 | 0.51 |
| -4 | -7  | 17 | 0.23  | 0.32 |
| -1 | -12 | 17 | 0.00  | 0.28 |
| -6 | -14 | 10 | -0.12 | 0.42 |
| -9 | -2  | 6  | -0.60 | 0.52 |
| 0  | -18 | 13 | 0.23  | 0.44 |

|    |     |    |       |      |
|----|-----|----|-------|------|
| 0  | -10 | 18 | 0.34  | 0.34 |
| -6 | -17 | 6  | -0.26 | 0.41 |
| -3 | -21 | 7  | 0.13  | 0.47 |
| 0  | -19 | 12 | 0.12  | 0.31 |
| -6 | -4  | 15 | -0.12 | 0.38 |
| -4 | 0   | 18 | 2.74  | 0.46 |
| -6 | -15 | 9  | 0.52  | 0.41 |
| -4 | -18 | 10 | 0.45  | 0.32 |
| -2 | -20 | 10 | 0.07  | 0.28 |
| -7 | -4  | 13 | -0.12 | 0.49 |
| -4 | -1  | 18 | 0.34  | 0.34 |
| -4 | -12 | 15 | 0.00  | 0.50 |
| -4 | -15 | 13 | 0.36  | 0.36 |
| -8 | -7  | 9  | -1.56 | 0.65 |
| -7 | -15 | 5  | 0.26  | 0.36 |
| 0  | -7  | 19 | -0.35 | 0.44 |
| -3 | -12 | 16 | -0.23 | 0.47 |
| -5 | -20 | 3  | 0.12  | 0.45 |
| -7 | -12 | 9  | 0.00  | 0.31 |
| -5 | -19 | 6  | 0.52  | 0.51 |
| -9 | -6  | 4  | -0.40 | 0.60 |
| -7 | -13 | 8  | 0.26  | 0.73 |
| -4 | -10 | 16 | 0.00  | 0.29 |
| -1 | -23 | 5  | 0.13  | 0.34 |
| -5 | -13 | 13 | -0.12 | 0.26 |
| -6 | -13 | 11 | -0.12 | 0.40 |
| -7 | -16 | 2  | 0.50  | 0.39 |
| -8 | -12 | 4  | 0.65  | 0.77 |
| -4 | -20 | 7  | 0.39  | 0.50 |
| -6 | -10 | 13 | 1.55  | 0.34 |
| 0  | -17 | 14 | -0.48 | 0.45 |
| -2 | -5  | 19 | -0.11 | 0.38 |
| -1 | -14 | 16 | -0.23 | 0.37 |
| -9 | -5  | 5  | -0.13 | 0.61 |
| -9 | -3  | 6  | 1.03  | 0.39 |
| -4 | -2  | 18 | 0.51  | 0.26 |
| -8 | -13 | 0  | 0.00  | 0.30 |
| -3 | -20 | 9  | -0.26 | 0.26 |
| -9 | -7  | 3  | 0.00  | 0.65 |
| -3 | -7  | 18 | -0.06 | 0.27 |
| -8 | -5  | 10 | 0.12  | 0.52 |
| -5 | -18 | 8  | -0.26 | 0.42 |
| -1 | -18 | 13 | 0.12  | 0.31 |
| -1 | -10 | 18 | -0.79 | 0.55 |
| 0  | -20 | 11 | 0.13  | 0.61 |
| -2 | -9  | 18 | 0.00  | 0.48 |
| -3 | -10 | 17 | -0.11 | 0.48 |
| -6 | -18 | 4  | 0.32  | 0.21 |
| -6 | -8  | 14 | 1.50  | 0.33 |
| -8 | -13 | 1  | -0.50 | 0.47 |
| -8 | -10 | 7  | 0.00  | 0.63 |
| -1 | -19 | 12 | 0.85  | 0.37 |
| -7 | -11 | 10 | 2.52  | 0.49 |
| -2 | -15 | 15 | 0.00  | 0.41 |
| -5 | 0   | 17 | -0.34 | 0.34 |
| 0  | -24 | 0  | 0.68  | 0.42 |
| -9 | -8  | 0  | -0.51 | 0.57 |
| -6 | -16 | 8  | -0.13 | 0.29 |

|    |     |    |       |      |
|----|-----|----|-------|------|
| 0  | -22 | 8  | 0.39  | 0.23 |
| -7 | -14 | 7  | 0.00  | 0.46 |
| -3 | -22 | 5  | -0.51 | 0.57 |
| -5 | -1  | 17 | 0.46  | 0.72 |
| -5 | -7  | 16 | 0.47  | 0.22 |
| -1 | -7  | 19 | 0.23  | 0.51 |
| -2 | -23 | 4  | 0.00  | 0.44 |
| 0  | -24 | 1  | 0.38  | 0.26 |
| -9 | -8  | 1  | 0.26  | 0.37 |
| -8 | -11 | 6  | 0.26  | 0.49 |
| -6 | -5  | 15 | 0.24  | 0.33 |
| -4 | -21 | 5  | -0.13 | 0.28 |
| 0  | 0   | 20 | 0.93  | 0.90 |
| -3 | -14 | 15 | -0.24 | 0.38 |
| -8 | -9  | 8  | -0.13 | 0.28 |
| -4 | -3  | 18 | -0.11 | 0.38 |
| -1 | -17 | 14 | 0.12  | 0.43 |
| -7 | -16 | 3  | -0.13 | 0.28 |
| -3 | 0   | 19 | -0.23 | 0.46 |
| -7 | -5  | 13 | 0.36  | 0.55 |
| -4 | -19 | 9  | 0.26  | 0.37 |
| 0  | -1  | 20 | 0.23  | 0.23 |
| -8 | -13 | 2  | 0.32  | 0.21 |
| -8 | 0   | 11 | -0.47 | 0.53 |
| -6 | -12 | 12 | 0.48  | 0.38 |
| -3 | -1  | 19 | 0.46  | 0.46 |
| -5 | -2  | 17 | -0.11 | 0.47 |
| -2 | -22 | 7  | 1.26  | 0.43 |
| -9 | -4  | 6  | 0.19  | 0.24 |
| -4 | -14 | 14 | -0.24 | 0.48 |
| -8 | -1  | 11 | -0.47 | 0.60 |
| -5 | -20 | 4  | 0.00  | 0.31 |
| 0  | -23 | 6  | -0.26 | 0.42 |
| -1 | -20 | 11 | 0.50  | 0.39 |
| 0  | -16 | 15 | 0.48  | 0.38 |
| 0  | -24 | 2  | 0.76  | 0.54 |
| -9 | -8  | 2  | 0.40  | 0.51 |
| -1 | -24 | 0  | 0.13  | 0.54 |
| -7 | -8  | 12 | 0.30  | 0.20 |
| 0  | -2  | 20 | -0.46 | 0.43 |
| -1 | -22 | 8  | 0.40  | 0.40 |
| -3 | -2  | 19 | 0.23  | 0.33 |
| -9 | 0   | 7  | -0.12 | 0.50 |
| -4 | -8  | 17 | 0.12  | 0.59 |
| -2 | -6  | 19 | -0.23 | 0.46 |
| -2 | -21 | 9  | -0.26 | 0.62 |
| -5 | -10 | 15 | 0.00  | 0.51 |
| -1 | -24 | 1  | -0.25 | 0.39 |
| -8 | -2  | 11 | 0.77  | 0.46 |
| -9 | -1  | 7  | 0.37  | 0.37 |
| -9 | -6  | 5  | 0.26  | 0.37 |
| -9 | -7  | 4  | -0.13 | 0.55 |
| -7 | -10 | 11 | 0.24  | 0.54 |
| -1 | 0   | 20 | -0.23 | 0.36 |
| -5 | -3  | 17 | 0.81  | 0.36 |
| -8 | -12 | 5  | -0.93 | 0.72 |
| -4 | -22 | 0  | -0.12 | 0.51 |
| -8 | -6  | 10 | 0.48  | 0.48 |

|    |     |    |       |      |
|----|-----|----|-------|------|
| -5 | -12 | 14 | 0.36  | 0.36 |
| -1 | -1  | 20 | -0.34 | 0.34 |
| 0  | -21 | 10 | 0.13  | 0.34 |
| -4 | -4  | 18 | 1.16  | 0.33 |
| -3 | -23 | 0  | 0.25  | 0.55 |
| -8 | -8  | 9  | 0.31  | 0.21 |
| 0  | -8  | 19 | -0.23 | 0.54 |
| -4 | -22 | 1  | -0.12 | 0.41 |
| -8 | -13 | 3  | 0.26  | 0.26 |
| 0  | -13 | 17 | 0.59  | 0.24 |
| -7 | -15 | 6  | 0.80  | 0.40 |
| -2 | -12 | 17 | 0.48  | 0.38 |
| -9 | -2  | 7  | 0.00  | 0.30 |
| 0  | -3  | 20 | 0.35  | 0.45 |
| -1 | -23 | 6  | 2.58  | 0.55 |
| -3 | -23 | 1  | -0.62 | 0.62 |
| -6 | -17 | 7  | 0.00  | 0.33 |
| -1 | -16 | 15 | 0.18  | 0.18 |
| -6 | -18 | 5  | 0.52  | 0.41 |
| -3 | -3  | 19 | 1.17  | 0.46 |
| -1 | -24 | 2  | -0.12 | 0.42 |
| -8 | -3  | 11 | -1.20 | 0.61 |
| -6 | -19 | 0  | -0.87 | 0.67 |
| -1 | -2  | 20 | -0.81 | 0.48 |
| 0  | -24 | 3  | 0.13  | 0.56 |
| -3 | -18 | 12 | 0.13  | 0.28 |
| -6 | -6  | 15 | 0.72  | 0.25 |
| -5 | -16 | 11 | 0.19  | 0.19 |
| -7 | -16 | 4  | 0.26  | 0.26 |
| -9 | -8  | 3  | -1.21 | 0.70 |
| -9 | -5  | 6  | -0.13 | 0.42 |
| -3 | -8  | 18 | 0.00  | 0.28 |
| 0  | -11 | 18 | 0.46  | 0.37 |
| -5 | -19 | 7  | -0.13 | 0.30 |
| -6 | -19 | 1  | 0.00  | 0.43 |
| -7 | -6  | 13 | 0.24  | 0.54 |
| -3 | -17 | 13 | 1.23  | 0.43 |
| -3 | -21 | 8  | 0.00  | 0.33 |
| -2 | -23 | 5  | 0.26  | 0.38 |
| -4 | -22 | 2  | 0.38  | 0.48 |
| -5 | -15 | 12 | 1.37  | 0.47 |
| -2 | -14 | 16 | -0.12 | 0.41 |
| -3 | -23 | 2  | 0.25  | 0.29 |
| -5 | -17 | 10 | -0.13 | 0.29 |
| -1 | -21 | 10 | 0.26  | 0.49 |
| -5 | -4  | 17 | -0.12 | 0.26 |
| -6 | -9  | 14 | 0.12  | 0.32 |
| -9 | -3  | 7  | 0.31  | 0.33 |
| -4 | -11 | 16 | -0.61 | 0.53 |
| -5 | -8  | 16 | -0.24 | 0.38 |
| -1 | -8  | 19 | -0.11 | 0.48 |
| -3 | -19 | 11 | 0.13  | 0.34 |
| -6 | -11 | 13 | -0.24 | 0.38 |
| -3 | -22 | 6  | -0.39 | 0.51 |
| -9 | -9  | 0  | 0.00  | 0.32 |
| -7 | 0   | 14 | 0.35  | 0.35 |
| -1 | -13 | 17 | 0.48  | 0.48 |
| -1 | -3  | 20 | 1.29  | 0.34 |

|    |     |    |       |      |
|----|-----|----|-------|------|
| -2 | -18 | 13 | 0.37  | 0.56 |
| -4 | -20 | 8  | -0.13 | 0.56 |
| -2 | -10 | 18 | -0.23 | 0.37 |
| -4 | -21 | 6  | 0.00  | 0.28 |
| -7 | -1  | 14 | -0.24 | 0.38 |
| -6 | -19 | 2  | -0.38 | 0.38 |
| -5 | -20 | 5  | -0.26 | 0.41 |
| 0  | -4  | 20 | 1.05  | 0.32 |
| -2 | -19 | 12 | 0.00  | 0.34 |
| -9 | -9  | 1  | 0.65  | 0.38 |
| -4 | -5  | 18 | -0.35 | 0.35 |
| -3 | -4  | 19 | -0.35 | 0.35 |
| 0  | -15 | 16 | 0.00  | 0.30 |
| -1 | -24 | 3  | -0.26 | 0.26 |
| -8 | -4  | 11 | 0.00  | 0.42 |
| -4 | -13 | 15 | 0.43  | 0.27 |
| -1 | -11 | 18 | 0.24  | 0.44 |
| -3 | -11 | 17 | 1.27  | 0.40 |
| -7 | -13 | 9  | -0.13 | 0.29 |
| -3 | -13 | 16 | -0.37 | 0.48 |
| -3 | -16 | 14 | 0.49  | 0.49 |
| -2 | -7  | 19 | 0.24  | 0.33 |
| -8 | -11 | 7  | 0.40  | 0.40 |
| -8 | -13 | 4  | 0.13  | 0.35 |
| -6 | -15 | 10 | 0.13  | 0.35 |
| -7 | -2  | 14 | -0.36 | 0.47 |
| -8 | -10 | 8  | 0.00  | 0.32 |
| -9 | -7  | 5  | 0.00  | 0.47 |
| -2 | -17 | 14 | -1.22 | 0.62 |
| -6 | 0   | 16 | 1.99  | 0.49 |
| -4 | -22 | 3  | 0.13  | 0.64 |
| -7 | -14 | 8  | -0.27 | 0.27 |
| -4 | -17 | 12 | 0.32  | 0.21 |
| -7 | -12 | 10 | 0.00  | 0.44 |
| -5 | -14 | 13 | 0.25  | 0.35 |
| -8 | -7  | 10 | 0.00  | 0.43 |
| -6 | -14 | 11 | 0.90  | 0.33 |
| -3 | -23 | 3  | 0.51  | 0.24 |
| -7 | -17 | 0  | 0.13  | 0.33 |
| -6 | -1  | 16 | -0.12 | 0.48 |
| -5 | -18 | 9  | -0.14 | 0.45 |
| -9 | -4  | 7  | 0.12  | 0.45 |
| -9 | -9  | 2  | 0.33  | 0.32 |
| -7 | -9  | 12 | -0.61 | 0.53 |
| -5 | -21 | 0  | 0.00  | 0.31 |
| 0  | -24 | 4  | 1.05  | 0.35 |
| -9 | -8  | 4  | 0.00  | 0.34 |
| 0  | -23 | 7  | 0.00  | 0.58 |
| -4 | -9  | 17 | 0.24  | 0.34 |
| -4 | -18 | 11 | 0.66  | 0.54 |
| -2 | -20 | 11 | 0.26  | 0.37 |
| -9 | -6  | 6  | 0.26  | 0.37 |
| -7 | -17 | 1  | 0.13  | 0.77 |
| -5 | -21 | 1  | 1.57  | 0.41 |
| -1 | -4  | 20 | -0.35 | 0.46 |
| -8 | -14 | 0  | 0.13  | 0.34 |
| -8 | -12 | 6  | 0.13  | 0.68 |
| -6 | -16 | 9  | 0.00  | 0.47 |

|    |     |    |       |      |
|----|-----|----|-------|------|
| 0  | -22 | 9  | 0.14  | 0.87 |
| -5 | -5  | 17 | 0.83  | 0.30 |
| -2 | -24 | 0  | 0.69  | 0.26 |
| -1 | -15 | 16 | 0.68  | 0.25 |
| -4 | -16 | 13 | 0.25  | 0.47 |
| -3 | -20 | 10 | -0.40 | 0.40 |
| -2 | -22 | 8  | -0.54 | 0.51 |
| -6 | -19 | 3  | -0.51 | 0.58 |
| -6 | -2  | 16 | 0.18  | 0.23 |
| -6 | -7  | 15 | 0.49  | 0.39 |
| -7 | -16 | 5  | 0.40  | 0.40 |
| -8 | -14 | 1  | 0.13  | 0.36 |
| -7 | -3  | 14 | 0.00  | 0.67 |
| -2 | -24 | 1  | 0.00  | 0.54 |
| -8 | -9  | 9  | 0.51  | 0.24 |
| 0  | -9  | 19 | -0.12 | 0.26 |
| -7 | -7  | 13 | 0.12  | 0.45 |
| 0  | -5  | 20 | -0.12 | 0.49 |
| -2 | 0   | 20 | 1.36  | 0.45 |
| -6 | -18 | 6  | 0.00  | 0.46 |
| -3 | -5  | 19 | 0.00  | 0.50 |
| -5 | -11 | 15 | -0.12 | 0.51 |
| -7 | -17 | 2  | -0.39 | 0.39 |
| -9 | 0   | 8  | 0.24  | 0.46 |
| -5 | -21 | 2  | -0.51 | 0.48 |
| -2 | -1  | 20 | 0.36  | 0.36 |
| -8 | -5  | 11 | -0.12 | 0.41 |
| -6 | -13 | 12 | 0.00  | 0.31 |
| -1 | -24 | 4  | -0.13 | 0.43 |
| 0  | -19 | 13 | -0.74 | 0.52 |
| -7 | -15 | 7  | 0.27  | 0.39 |
| -4 | -6  | 18 | -0.71 | 0.50 |
| -9 | -1  | 8  | -0.38 | 0.65 |
| -7 | -11 | 11 | -0.38 | 0.49 |
| -1 | -23 | 7  | 0.14  | 0.36 |
| -2 | -23 | 6  | 0.13  | 0.35 |
| -9 | -9  | 3  | 0.55  | 0.30 |
| -3 | -9  | 18 | -0.12 | 0.40 |
| -2 | -16 | 15 | -0.25 | 0.39 |
| -8 | -14 | 2  | 0.00  | 0.32 |
| -4 | -19 | 10 | -0.14 | 0.45 |
| -6 | -3  | 16 | -1.20 | 0.54 |
| -2 | -24 | 2  | 1.02  | 0.30 |
| -3 | -15 | 15 | 0.25  | 0.35 |
| -1 | -22 | 9  | -0.40 | 0.62 |
| 0  | -18 | 14 | 0.50  | 0.23 |
| -2 | -2  | 20 | 0.60  | 0.28 |
| -9 | -5  | 7  | 0.26  | 0.36 |
| 0  | -20 | 12 | 0.38  | 0.49 |
| -4 | -22 | 4  | 0.52  | 0.41 |
| -9 | -2  | 8  | 0.31  | 0.26 |
| -3 | -23 | 4  | 1.18  | 0.45 |
| -5 | -9  | 16 | 0.25  | 0.35 |
| -6 | -17 | 8  | -0.82 | 0.58 |
| -1 | -9  | 19 | 2.68  | 0.57 |
| -7 | -4  | 14 | -0.12 | 0.28 |
| -4 | -15 | 14 | 0.37  | 0.37 |
| -8 | -13 | 5  | -0.14 | 0.56 |

|    |     |    |       |      |
|----|-----|----|-------|------|
| -1 | -5  | 20 | 0.60  | 0.35 |
| -5 | -20 | 6  | 0.40  | 0.23 |
| -5 | -13 | 14 | -0.12 | 0.28 |
| -2 | -21 | 10 | -0.13 | 0.65 |
| -6 | -10 | 14 | 0.25  | 0.20 |
| -2 | -8  | 19 | -0.48 | 0.53 |
| -5 | -19 | 8  | 1.86  | 0.43 |
| -1 | -19 | 13 | 0.63  | 0.29 |
| -7 | -17 | 3  | 0.39  | 0.32 |
| -3 | -22 | 7  | 0.14  | 0.59 |
| -6 | -19 | 4  | -0.26 | 0.26 |
| -5 | -21 | 3  | 0.26  | 0.48 |
| 0  | -24 | 5  | 0.41  | 0.23 |
| -5 | -6  | 17 | 0.12  | 0.32 |
| -2 | -13 | 17 | -0.12 | 0.41 |
| -9 | -10 | 0  | -0.13 | 0.29 |
| -9 | -8  | 5  | -0.55 | 0.62 |
| 0  | -12 | 18 | 0.66  | 0.48 |
| -2 | -3  | 20 | 0.60  | 0.49 |
| -4 | -21 | 7  | 0.27  | 0.38 |
| -8 | 0   | 12 | 0.49  | 0.39 |
| -9 | -7  | 6  | 0.40  | 0.52 |
| -8 | -8  | 10 | 0.51  | 0.40 |
| -8 | -14 | 3  | 0.46  | 0.29 |
| 0  | -14 | 17 | -0.37 | 0.48 |
| -9 | -10 | 1  | 0.33  | 0.27 |
| -9 | -3  | 8  | 0.82  | 0.38 |
| -6 | -4  | 16 | 0.97  | 0.38 |
| -1 | -18 | 14 | 0.12  | 0.33 |
| -8 | -1  | 12 | -0.12 | 0.28 |
| -2 | -24 | 3  | -0.78 | 0.55 |
| 0  | -17 | 15 | -0.63 | 0.45 |
| 0  | -6  | 20 | 0.00  | 0.29 |
| -1 | -20 | 12 | -0.38 | 0.38 |
| -3 | -6  | 19 | -0.24 | 0.24 |
| -2 | -11 | 18 | 0.12  | 0.32 |
| -3 | -21 | 9  | 0.28  | 0.39 |
| -4 | -12 | 16 | 0.00  | 0.76 |
| -8 | -6  | 11 | -0.13 | 0.67 |
| -6 | -12 | 13 | -0.50 | 0.56 |
| 0  | -21 | 11 | -1.04 | 0.61 |
| -9 | -9  | 4  | 0.28  | 0.40 |
| -8 | -2  | 12 | 0.25  | 0.35 |
| -6 | -8  | 15 | 0.38  | 0.38 |
| -7 | -16 | 6  | -0.82 | 0.47 |
| -9 | -10 | 2  | 0.27  | 0.38 |
| -8 | -11 | 8  | 0.41  | 0.24 |
| -7 | -10 | 12 | 0.00  | 0.44 |
| -4 | -20 | 9  | 0.97  | 0.43 |
| -7 | -8  | 13 | -0.13 | 0.25 |
| -7 | -5  | 14 | 0.75  | 0.27 |
| -1 | -24 | 5  | -0.13 | 0.30 |
| -4 | -7  | 18 | -0.12 | 0.50 |
| -1 | -12 | 18 | 0.00  | 0.60 |
| -3 | -12 | 17 | -0.12 | 0.52 |
| -9 | -6  | 7  | -0.39 | 0.39 |
| -4 | -10 | 17 | -0.37 | 0.37 |
| -8 | -12 | 7  | 0.28  | 0.52 |



|    |     |    |       |      |
|----|-----|----|-------|------|
| -2 | -4  | 20 | 0.36  | 0.47 |
| -1 | -14 | 17 | -0.12 | 0.28 |
| -2 | -15 | 16 | 0.63  | 0.52 |
| -1 | -17 | 15 | 2.34  | 0.47 |
| -1 | -6  | 20 | 0.24  | 0.34 |
| -9 | -4  | 8  | -0.13 | 0.28 |
| -4 | -22 | 5  | 0.00  | 0.46 |
| 0  | -23 | 8  | 0.00  | 0.34 |
| -8 | -10 | 9  | -0.14 | 0.64 |
| -7 | -17 | 4  | -0.67 | 0.58 |
| -8 | -3  | 12 | -0.13 | 0.42 |
| 0  | -10 | 19 | -0.24 | 0.38 |
| -3 | -23 | 5  | -0.27 | 0.53 |
| -5 | -17 | 11 | 0.00  | 0.33 |
| -5 | -21 | 4  | -0.79 | 0.46 |
| -1 | -21 | 11 | -0.13 | 0.55 |
| -6 | -18 | 7  | 0.89  | 0.34 |
| -5 | -16 | 12 | -0.26 | 0.41 |
| -4 | -14 | 15 | 0.82  | 0.28 |
| -6 | -5  | 16 | -0.37 | 0.48 |
| -7 | -14 | 9  | -0.41 | 0.53 |
| -3 | -14 | 16 | 0.00  | 0.31 |
| -4 | 0   | 19 | -0.12 | 0.40 |
| -7 | -13 | 10 | 0.27  | 0.60 |
| -8 | -14 | 4  | 0.54  | 0.43 |
| -4 | -1  | 19 | 0.24  | 0.45 |
| -2 | -24 | 4  | 0.13  | 0.48 |
| -6 | -19 | 5  | -1.08 | 0.63 |
| -2 | -23 | 7  | 0.00  | 0.48 |
| -5 | -7  | 17 | 0.37  | 0.21 |
| 0  | -25 | 0  | -0.26 | 0.41 |
| -3 | -18 | 13 | 0.19  | 0.19 |
| -9 | -10 | 3  | 0.00  | 0.34 |
| -3 | -10 | 18 | -0.12 | 0.41 |
| -8 | -13 | 6  | -0.28 | 0.28 |
| -3 | -19 | 12 | 0.13  | 0.66 |
| 0  | -16 | 16 | 1.84  | 0.41 |
| 0  | -25 | 1  | 0.39  | 0.39 |
| -2 | -22 | 9  | 1.26  | 0.57 |
| -5 | -18 | 10 | -0.56 | 0.62 |
| -5 | 0   | 18 | -0.12 | 0.50 |
| -4 | -2  | 19 | -0.12 | 0.40 |
| -5 | -12 | 15 | -0.13 | 0.42 |
| 0  | -7  | 20 | -0.12 | 0.59 |
| -7 | -15 | 8  | 1.54  | 0.44 |
| -5 | -15 | 13 | 0.26  | 0.37 |
| -6 | -15 | 11 | -0.27 | 0.43 |
| -5 | -1  | 18 | 0.12  | 0.32 |
| -6 | -20 | 0  | 2.58  | 0.47 |
| -1 | -23 | 8  | 2.17  | 0.60 |
| 0  | -24 | 6  | -0.28 | 0.56 |
| -3 | -7  | 19 | 0.00  | 0.52 |
| -6 | -16 | 10 | -0.14 | 0.31 |
| -1 | -10 | 19 | 0.49  | 0.39 |
| -5 | -10 | 16 | -0.13 | 0.53 |
| -2 | -9  | 19 | -0.37 | 0.47 |
| 0  | -22 | 10 | 0.14  | 0.36 |
| -2 | -5  | 20 | -0.12 | 0.27 |

|    |     |    |       |      |
|----|-----|----|-------|------|
| -5 | -20 | 7  | 0.00  | 0.34 |
| -7 | -12 | 11 | -0.66 | 0.47 |
| -8 | -7  | 11 | 0.13  | 0.34 |
| -8 | -4  | 12 | 0.13  | 0.34 |
| -6 | -20 | 1  | 0.78  | 0.28 |
| -3 | -17 | 14 | 0.13  | 0.46 |
| -7 | -6  | 14 | -0.64 | 0.56 |
| -8 | -15 | 0  | -0.40 | 0.40 |
| -4 | -23 | 0  | -0.26 | 0.41 |
| -8 | -9  | 10 | 0.26  | 0.49 |
| -2 | -19 | 13 | -0.13 | 0.43 |
| -5 | -2  | 18 | 0.12  | 0.32 |
| 0  | -25 | 2  | 0.27  | 0.27 |
| -8 | -15 | 1  | -0.27 | 0.27 |
| -1 | -25 | 0  | -0.26 | 0.26 |
| -4 | -23 | 1  | -0.26 | 0.61 |
| -3 | -20 | 11 | -0.14 | 0.31 |
| -6 | -14 | 12 | -0.13 | 0.44 |
| -4 | -3  | 19 | 0.00  | 0.30 |
| -6 | -11 | 14 | -0.38 | 0.50 |
| -1 | -16 | 16 | 0.26  | 0.36 |
| -2 | -18 | 14 | 0.51  | 0.40 |
| -1 | -25 | 1  | 1.71  | 0.41 |
| -3 | -24 | 0  | 0.52  | 0.41 |
| -4 | -18 | 12 | -0.14 | 0.55 |
| -2 | -20 | 12 | 0.27  | 0.50 |
| -6 | -20 | 2  | 0.39  | 0.76 |
| -3 | -22 | 8  | 0.00  | 0.34 |
| -4 | -8  | 18 | 2.04  | 0.60 |
| -1 | -7  | 20 | -0.25 | 0.25 |
| -6 | -17 | 9  | -0.57 | 0.53 |
| -7 | -18 | 0  | 0.00  | 0.32 |
| -6 | -6  | 16 | -1.01 | 0.59 |
| -6 | -9  | 15 | -0.13 | 0.29 |
| -3 | -24 | 1  | -0.52 | 0.59 |
| -1 | -24 | 6  | 0.00  | 0.34 |
| -4 | -21 | 8  | -0.14 | 0.67 |
| -4 | -17 | 13 | 0.39  | 0.39 |
| -1 | -22 | 10 | 0.00  | 0.34 |
| -7 | -17 | 5  | -0.14 | 0.66 |
| -7 | 0   | 15 | -0.99 | 0.49 |
| -7 | -9  | 13 | 0.13  | 0.34 |
| -7 | -18 | 1  | 0.13  | 0.35 |
| -5 | -21 | 5  | 0.41  | 0.23 |
| -3 | 0   | 20 | 0.55  | 0.28 |
| -5 | -3  | 18 | -0.61 | 0.44 |
| -8 | -15 | 2  | 0.00  | 0.33 |
| -4 | -23 | 2  | 0.39  | 0.39 |
| -7 | -1  | 15 | 1.18  | 0.41 |
| -5 | -19 | 9  | -0.43 | 0.55 |
| -3 | -1  | 20 | 0.24  | 0.46 |
| -7 | -16 | 7  | 0.00  | 0.35 |
| -8 | -14 | 5  | 0.62  | 0.40 |
| -1 | -25 | 2  | 0.13  | 0.48 |
| -4 | -19 | 11 | 0.00  | 0.34 |
| -2 | -24 | 5  | -0.14 | 0.56 |
| -4 | -22 | 6  | 0.55  | 0.26 |
| 0  | -13 | 18 | -0.12 | 0.41 |

|    |     |    |       |      |
|----|-----|----|-------|------|
| -5 | -14 | 14 | -0.13 | 0.43 |
| 0  | 0   | 21 | -0.12 | 0.41 |
| -2 | -12 | 18 | 0.63  | 0.68 |
| -3 | -23 | 6  | 1.09  | 0.47 |
| 0  | -25 | 3  | 0.54  | 0.30 |
| -8 | -5  | 12 | -0.90 | 0.53 |
| -3 | -16 | 15 | -0.13 | 0.43 |
| 0  | -1  | 21 | -0.25 | 0.25 |
| -3 | -24 | 2  | -0.53 | 0.49 |
| -2 | -14 | 17 | 0.26  | 0.36 |
| -7 | -11 | 12 | 1.75  | 0.49 |
| -3 | -2  | 20 | 0.18  | 0.28 |
| -4 | -4  | 19 | 0.12  | 0.33 |
| -7 | -2  | 15 | 0.37  | 0.31 |
| -2 | -17 | 15 | -0.07 | 0.35 |
| -7 | -18 | 2  | 0.40  | 0.40 |
| -2 | -6  | 20 | 0.00  | 0.43 |
| -5 | -8  | 17 | 0.57  | 0.24 |
| -4 | -11 | 17 | 0.00  | 0.31 |
| -4 | -13 | 16 | -1.43 | 0.72 |
| -6 | -19 | 6  | -0.83 | 0.48 |
| -6 | -20 | 3  | -0.14 | 0.55 |
| -4 | -16 | 14 | 0.78  | 0.55 |
| -6 | -13 | 13 | -0.52 | 0.58 |
| -2 | -21 | 11 | 0.28  | 0.52 |
| 0  | -2  | 21 | -0.25 | 0.58 |
| -5 | -22 | 0  | -1.05 | 0.61 |
| -7 | -7  | 14 | 0.71  | 0.27 |
| -3 | -21 | 10 | 0.35  | 0.29 |
| 0  | -8  | 20 | 2.29  | 0.48 |
| -5 | -4  | 18 | 0.00  | 0.30 |
| -3 | -8  | 19 | 0.25  | 0.46 |
| 0  | -15 | 17 | 0.38  | 0.38 |
| 0  | -11 | 19 | -0.12 | 0.28 |
| -4 | -23 | 3  | 0.13  | 0.35 |
| -5 | -22 | 1  | -0.13 | 0.44 |
| -1 | -13 | 18 | -1.39 | 0.63 |
| -3 | -13 | 17 | 0.78  | 0.36 |
| -1 | 0   | 21 | -0.50 | 0.56 |
| -1 | -25 | 3  | 1.68  | 0.44 |
| -3 | -3  | 20 | 0.62  | 0.29 |
| -6 | -18 | 8  | 0.57  | 0.27 |
| 0  | -20 | 13 | -0.39 | 0.50 |
| -7 | -3  | 15 | 0.50  | 0.60 |
| 0  | -19 | 14 | 0.26  | 0.48 |
| -1 | -1  | 21 | 0.62  | 0.51 |
| -6 | 0   | 17 | -0.13 | 0.51 |
| -4 | -20 | 10 | 0.57  | 0.36 |
| -3 | -24 | 3  | 0.27  | 0.50 |
| 0  | -23 | 9  | 0.28  | 0.40 |
| -6 | -1  | 17 | 0.25  | 0.35 |
| -3 | -11 | 18 | -0.63 | 0.46 |
| -2 | -23 | 8  | 0.00  | 0.50 |
| 0  | -24 | 7  | -1.15 | 0.76 |
| 0  | -3  | 21 | 0.00  | 0.30 |
| -6 | -7  | 16 | -0.13 | 0.43 |
| -7 | -18 | 3  | -0.55 | 0.51 |
| -2 | -10 | 19 | -0.50 | 0.56 |

|    |     |    |       |      |
|----|-----|----|-------|------|
| -5 | -22 | 2  | 0.00  | 0.46 |
| -1 | -2  | 21 | -0.13 | 0.41 |
| 0  | -25 | 4  | 0.48  | 0.25 |
| -4 | -5  | 19 | -0.13 | 0.28 |
| -1 | -8  | 20 | 0.75  | 0.26 |
| 0  | -21 | 12 | 0.40  | 0.40 |
| -1 | -15 | 17 | -0.13 | 0.43 |
| -5 | -11 | 16 | 0.26  | 0.37 |
| -1 | -11 | 19 | 1.37  | 0.40 |
| 0  | -18 | 15 | -0.39 | 0.68 |
| -6 | -2  | 17 | 0.25  | 0.35 |
| -2 | -25 | 0  | -0.13 | 0.30 |
| -5 | -20 | 8  | 0.00  | 0.35 |
| -1 | -20 | 13 | -0.13 | 0.44 |
| -4 | -9  | 18 | 0.13  | 0.34 |
| -6 | -20 | 4  | -0.55 | 0.70 |
| -1 | -19 | 14 | 0.32  | 0.35 |
| -5 | -21 | 6  | -0.42 | 0.64 |
| -3 | -4  | 20 | -0.13 | 0.28 |
| -4 | -15 | 15 | 0.00  | 0.32 |
| -2 | -16 | 16 | 1.64  | 0.43 |
| -2 | -25 | 1  | 0.13  | 0.35 |
| -5 | -5  | 18 | 0.12  | 0.33 |
| -3 | -15 | 16 | -0.26 | 0.42 |
| -1 | -23 | 9  | -0.14 | 0.32 |
| -5 | -13 | 15 | -0.27 | 0.62 |
| -2 | -7  | 20 | 0.00  | 0.43 |
| -1 | -3  | 21 | -0.25 | 0.59 |
| -6 | -10 | 15 | -0.27 | 0.53 |
| -1 | -24 | 7  | -0.14 | 0.32 |
| -2 | -24 | 6  | -0.85 | 0.69 |
| -4 | -23 | 4  | 0.27  | 0.51 |
| 0  | -4  | 21 | -0.13 | 0.52 |
| -2 | -22 | 10 | 0.14  | 0.62 |
| -1 | -25 | 4  | -1.11 | 0.87 |
| -6 | -3  | 17 | 0.00  | 0.31 |
| -6 | -12 | 14 | 0.52  | 0.52 |
| -5 | -22 | 3  | 0.00  | 0.47 |
| -5 | -17 | 12 | 0.41  | 0.42 |
| -1 | -21 | 12 | 0.00  | 0.47 |
| -1 | -18 | 15 | 0.39  | 0.39 |
| -4 | -22 | 7  | 1.27  | 0.46 |
| -3 | -24 | 4  | 0.27  | 0.39 |
| -2 | -25 | 2  | -0.54 | 0.69 |
| -3 | -23 | 7  | 0.42  | 0.65 |
| -5 | -9  | 17 | 0.65  | 0.44 |
| -5 | -18 | 11 | 0.14  | 0.37 |
| -3 | -22 | 9  | -0.15 | 0.48 |
| -5 | -16 | 13 | 0.40  | 0.37 |
| 0  | -22 | 11 | 0.28  | 0.62 |
| -4 | -6  | 19 | 0.50  | 0.32 |
| 0  | -17 | 16 | -0.40 | 0.51 |
| -4 | -21 | 9  | -0.88 | 0.62 |
| 0  | -9  | 20 | 0.31  | 0.30 |
| -3 | -9  | 19 | 1.01  | 0.48 |
| -1 | -4  | 21 | -0.13 | 0.42 |
| -3 | -5  | 20 | -0.13 | 0.42 |
| 0  | -25 | 5  | -0.14 | 0.32 |

|    |     |    |       |      |
|----|-----|----|-------|------|
| -3 | -19 | 13 | 0.13  | 0.49 |
| -5 | -6  | 18 | -0.38 | 0.38 |
| 0  | -5  | 21 | -0.25 | 0.51 |
| -2 | -13 | 18 | -0.13 | 0.53 |
| -2 | 0   | 21 | 0.06  | 0.28 |
| -2 | -25 | 3  | 0.41  | 0.29 |
| -4 | -12 | 17 | 0.13  | 0.58 |
| -5 | -19 | 10 | 0.29  | 0.55 |
| -2 | -1  | 21 | -0.25 | 0.40 |
| -3 | -18 | 14 | 0.00  | 0.33 |
| 0  | -14 | 18 | 0.00  | 0.55 |
| -5 | -22 | 4  | -0.41 | 0.41 |
| -1 | -22 | 11 | -0.71 | 0.51 |
| -3 | -20 | 12 | 0.14  | 0.62 |
| -1 | -17 | 16 | -1.20 | 0.61 |
| -1 | -9  | 20 | -0.38 | 0.38 |
| 0  | -12 | 19 | 0.19  | 0.29 |
| -4 | -23 | 5  | -0.14 | 0.46 |
| -2 | -2  | 21 | 0.50  | 0.60 |
| -4 | -14 | 16 | -0.27 | 0.54 |
| -1 | -25 | 5  | 0.56  | 0.56 |
| -2 | -8  | 20 | 2.23  | 0.41 |
| -2 | -15 | 17 | -0.13 | 0.30 |
| -2 | -11 | 19 | -0.26 | 0.41 |
| 0  | -24 | 8  | -0.74 | 0.53 |
| -3 | -24 | 5  | 0.00  | 0.49 |
| -1 | -5  | 21 | 0.95  | 0.33 |
| -3 | -12 | 18 | -0.26 | 0.26 |
| -4 | -18 | 13 | 0.34  | 0.33 |
| -2 | -19 | 14 | 0.13  | 0.48 |
| -4 | -10 | 18 | -0.26 | 0.41 |
| -2 | -20 | 13 | 0.27  | 0.39 |
| -4 | -19 | 12 | -0.14 | 0.32 |
| -3 | -14 | 17 | -0.67 | 0.49 |
| -1 | -14 | 18 | 0.13  | 0.47 |
| -3 | -6  | 20 | 0.13  | 0.34 |
| -2 | -23 | 9  | 0.00  | 0.36 |
| -3 | -17 | 15 | 1.60  | 0.46 |
| -2 | -3  | 21 | 0.00  | 0.44 |
| -2 | -24 | 7  | 0.14  | 0.52 |
| -1 | -12 | 19 | -0.26 | 0.41 |
| -3 | -21 | 11 | 0.14  | 0.52 |
| -2 | -25 | 4  | 0.00  | 0.30 |
| 0  | -6  | 21 | 0.51  | 0.51 |
| 0  | -23 | 10 | -0.44 | 0.56 |
| 0  | -16 | 17 | 0.40  | 0.23 |
| -2 | -21 | 12 | 0.14  | 0.36 |
| -2 | -18 | 15 | -0.14 | 0.44 |
| -1 | -24 | 8  | -0.45 | 0.68 |
| 0  | -26 | 0  | 0.95  | 0.76 |
| 0  | -25 | 6  | 0.00  | 0.36 |
| 0  | -26 | 1  | -0.56 | 0.52 |
| 0  | -10 | 20 | 0.64  | 0.26 |
| -2 | -4  | 21 | 0.71  | 0.27 |
| -1 | -23 | 10 | 1.47  | 0.52 |
| -1 | -6  | 21 | -0.13 | 0.30 |
| -1 | -16 | 17 | 0.13  | 0.36 |
| 0  | -26 | 2  | 0.42  | 0.42 |

```
0 0 0 0.00 0.00
;
_shelx_hkl_checksum 91525
```

### CIF of [Et<sub>2</sub>SnCl{SC<sub>4</sub>H(Me-4,6)<sub>2</sub>N<sub>2</sub>}] (5)

data\_shelx

```
_audit_creation_method      SHELXL-2014/6
_chemical_name_systematic   ?
_chemical_name_common       ?
_chemical_melting_point     ?
_chemical_formula_moiety    'C10 H17 Cl N2 S Sn'
_chemical_formula_sum       'C10 H17 Cl N2 S Sn'
_chemical_formula_weight    351.45
```

loop\_

```
_atom_type_symbol
_atom_type_description
_atom_type_scatter_dispersion_real
_atom_type_scatter_dispersion_imag
_atom_type_scatter_source
'C' 'C' 0.0033 0.0016
'International Tables Vol C Tables 4.2.6.8 and 6.1.1.4'
'H' 'H' 0.0000 0.0000
'International Tables Vol C Tables 4.2.6.8 and 6.1.1.4'
'N' 'N' 0.0061 0.0033
'International Tables Vol C Tables 4.2.6.8 and 6.1.1.4'
'S' 'S' 0.1246 0.1234
'International Tables Vol C Tables 4.2.6.8 and 6.1.1.4'
'Cl' 'Cl' 0.1484 0.1585
'International Tables Vol C Tables 4.2.6.8 and 6.1.1.4'
'Sn' 'Sn' -0.6537 1.4246
'International Tables Vol C Tables 4.2.6.8 and 6.1.1.4'
```

```
_space_group_crystal_system monoclinic
_space_group_IT_number      14
_space_group_name_H-M_alt   'P 21/n'
_space_group_name_Hall      '-P 2yn'
```

\_shelx\_space\_group\_comment

```
;
The symmetry employed for this shelxl refinement is uniquely defined
by the following loop, which should always be used as a source of
symmetry information in preference to the above space-group names.
They are only intended as comments.
;
```

loop\_

```
_space_group_symop_operation_xyz
'x, y, z'
'-x+1/2, y+1/2, -z+1/2'
```

'-x, -y, -z'  
'x-1/2, -y-1/2, z-1/2'

|                                          |                                        |
|------------------------------------------|----------------------------------------|
| _cell_length_a                           | 10.6207(15)                            |
| _cell_length_b                           | 11.907(5)                              |
| _cell_length_c                           | 11.589(2)                              |
| _cell_angle_alpha                        | 90                                     |
| _cell_angle_beta                         | 91.786(13)                             |
| _cell_angle_gamma                        | 90                                     |
| _cell_volume                             | 1464.9(7)                              |
| _cell_formula_units_Z                    | 4                                      |
| _cell_measurement_temperature            | 298(2)                                 |
| _cell_measurement_reflms_used            | 25                                     |
| _cell_measurement_theta_min              | 7.7                                    |
| _cell_measurement_theta_max              | 10.8                                   |
| _exptl_crystal_description               | 'plate'                                |
| _exptl_crystal_colour                    | 'Pale yellow'                          |
| _exptl_crystal_density_meas              | ?                                      |
| _exptl_crystal_density_method            | ?                                      |
| _exptl_crystal_density_diffn             | 1.594                                  |
| _exptl_crystal_F_000                     | 696                                    |
| _exptl_transmission_factor_min           | ?                                      |
| _exptl_transmission_factor_max           | ?                                      |
| _exptl_crystal_size_max                  | 0.150                                  |
| _exptl_crystal_size_mid                  | 0.150                                  |
| _exptl_crystal_size_min                  | 0.050                                  |
| _exptl_absorpt_coefficient_mu            | 2.044                                  |
| _shelx_estimated_absorpt_T_min           | 0.749                                  |
| _shelx_estimated_absorpt_T_max           | 0.905                                  |
| _exptl_absorpt_correction_type           | psi-scan                               |
| _exptl_absorpt_process_details           | '(North, Phillips & Mathews,<br>1968)' |
| _exptl_absorpt_correction_T_min          | 0.603                                  |
| _exptl_absorpt_correction_T_max          | 0.880                                  |
| _exptl_absorpt_special_details           | ?                                      |
| _diffn_ambient_temperature               | 298(2)                                 |
| _diffn_radiation_wavelength              | 0.71069                                |
| _diffn_radiation_type                    | MoK\alpha                              |
| _diffn_source                            | 'Sealed Tube'                          |
| _diffn_measurement_device_type           | 'Rigaku AFC7S'                         |
| _diffn_measurement_method                | \w-2\q                                 |
| _diffn_detector_area_resol_mean          | ?                                      |
| _diffn_reflms_number                     | 7908                                   |
| _diffn_reflms_av_unetI/netI              | 0.0802                                 |
| _diffn_reflms_av_R_equivalents           | 0.0663                                 |
| _diffn_reflms_limit_h_min                | -7                                     |
| _diffn_reflms_limit_h_max                | 13                                     |
| _diffn_reflms_limit_k_min                | -15                                    |
| _diffn_reflms_limit_k_max                | 15                                     |
| _diffn_reflms_limit_l_min                | -15                                    |
| _diffn_reflms_limit_l_max                | 15                                     |
| _diffn_reflms_theta_min                  | 2.562                                  |
| _diffn_reflms_theta_max                  | 27.492                                 |
| _diffn_reflms_theta_full                 | 25.240                                 |
| _diffn_measured_fraction_theta_max       | 0.999                                  |
| _diffn_measured_fraction_theta_full      | 0.999                                  |
| _diffn_reflms_Laue_measured_fraction_max | 0.999                                  |

```

_diffrn_reflms_Laue_measured_fraction_full    0.999
_diffrn_reflms_point_group_measured_fraction_max    0.999
_diffrn_reflms_point_group_measured_fraction_full    0.999
_reflms_number_total                3364
_reflms_number_gt                    1534
_reflms_threshold_expression         'I > 2\s(I) '
_reflms_Friedel_coverage             0.000
_reflms_Friedel_fraction_max        .
_reflms_Friedel_fraction_full       .

_reflms_special_details
;
Reflections were merged by SHELXL according to the crystal
class for the calculation of statistics and refinement.

_reflms_Friedel_fraction is defined as the number of unique
Friedel pairs measured divided by the number that would be
possible theoretically, ignoring centric projections and
systematic absences.
;

_computing_data_collection           'WinAFC'
_computing_cell_refinement           'WinAFC'
_computing_data_reduction            'CrystalStructure'
_computing_structure_solution        'SIR92'
_computing_structure_refinement      'SHELXL-2014/6 (Sheldrick, 2014) '
_computing_molecular_graphics        'Ortep-3 for windows'
_computing_publication_material      'WinGX 2013.3'
_refine_special_details               ?
_refine_ls_structure_factor_coef     Fsqd
_refine_ls_matrix_type               full
_refine_ls_weighting_scheme          calc
_refine_ls_weighting_details
'w=1/[\s^2^(Fo^2^)+(0.0351P)^2^+3.4212P] where P=(Fo^2^+2Fc^2^)/3'
_atom_sites_solution_primary         ?
_atom_sites_solution_secondary       ?
_atom_sites_solution_hydrogens       geom
_refine_ls_hydrogen_treatment        constr
_refine_ls_extinction_method         none
_refine_ls_extinction_coef           .
_refine_ls_number_reflms             3364
_refine_ls_number_parameters         140
_refine_ls_number_restraints         0
_refine_ls_R_factor_all              0.1392
_refine_ls_R_factor_gt               0.0538
_refine_ls_wR_factor_ref             0.1365
_refine_ls_wR_factor_gt              0.1120
_refine_ls_goodness_of_fit_ref       0.990
_refine_ls_restrained_S_all          0.990
_refine_ls_shift/su_max              0.000
_refine_ls_shift/su_mean             0.000

loop_
_atom_site_label
_atom_site_type_symbol
_atom_site_fract_x
_atom_site_fract_y
_atom_site_fract_z

```



```

_atom_site_U_iso_or_equiv
_atom_site_adp_type
_atom_site_occupancy
_atom_site_site_symmetry_order
_atom_site_calc_flag
_atom_site_refinement_flags_posn
_atom_site_refinement_flags_adp
_atom_site_refinement_flags_occupancy
_atom_site_disorder_assembly
_atom_site_disorder_group
C1 C 0.1352(7) 0.3312(7) 0.3389(7) 0.077(2) Uani 1 1 d . . . . .
C2 C 0.0108(7) 0.2095(6) 0.2344(7) 0.080(2) Uani 1 1 d . . . . .
C3 C -0.0891(7) 0.2785(7) 0.2510(8) 0.088(2) Uani 1 1 d . . . . .
H3 H -0.1687 0.2598 0.2213 0.105 Uiso 1 1 calc R U . . .
C4 C -0.0705(8) 0.3766(8) 0.3126(8) 0.089(3) Uani 1 1 d . . . . .
C5 C 0.0018(8) 0.1010(8) 0.1658(9) 0.114(3) Uani 1 1 d . . . . .
H5A H 0.0466 0.1091 0.0956 0.170 Uiso 1 1 calc R U . . .
H5B H -0.0851 0.0845 0.1476 0.170 Uiso 1 1 calc R U . . .
H5C H 0.0381 0.0408 0.2107 0.170 Uiso 1 1 calc R U . . .
C6 C -0.1753(8) 0.4576(8) 0.3327(9) 0.116(3) Uani 1 1 d . . . . .
H6A H -0.1609 0.4944 0.4056 0.174 Uiso 1 1 calc R U . . .
H6B H -0.2538 0.4177 0.3333 0.174 Uiso 1 1 calc R U . . .
H6C H -0.1783 0.5125 0.2721 0.174 Uiso 1 1 calc R U . . .
C7 C 0.3754(8) 0.2082(8) 0.1206(8) 0.108(3) Uani 1 1 d . . . . .
H7A H 0.3990 0.1369 0.0872 0.130 Uiso 1 1 calc R U . . .
H7B H 0.2943 0.2294 0.0865 0.130 Uiso 1 1 calc R U . . .
C8 C 0.4687(13) 0.2930(10) 0.0896(11) 0.163(5) Uani 1 1 d . . . . .
H8A H 0.4601 0.3579 0.1379 0.244 Uiso 1 1 calc R U . . .
H8B H 0.4553 0.3140 0.0103 0.244 Uiso 1 1 calc R U . . .
H8C H 0.5519 0.2624 0.1005 0.244 Uiso 1 1 calc R U . . .
C9 C 0.3146(8) 0.0359(7) 0.3907(7) 0.098(3) Uani 1 1 d . . . . .
H9A H 0.2578 -0.0088 0.3423 0.118 Uiso 1 1 calc R U . . .
H9B H 0.3922 -0.0063 0.4014 0.118 Uiso 1 1 calc R U . . .
C10 C 0.2597(14) 0.0495(10) 0.5004(10) 0.179(6) Uani 1 1 d . . . . .
H10A H 0.3110 0.0991 0.5472 0.269 Uiso 1 1 calc R U . . .
H10B H 0.2544 -0.0223 0.5377 0.269 Uiso 1 1 calc R U . . .
H10C H 0.1768 0.0807 0.4902 0.269 Uiso 1 1 calc R U . . .
N1 N 0.1247(5) 0.2340(5) 0.2791(5) 0.0691(15) Uani 1 1 d . . . . .
N2 N 0.0437(6) 0.4046(6) 0.3565(6) 0.0831(18) Uani 1 1 d . . . . .
S1 S 0.2855(2) 0.3577(2) 0.3965(2) 0.0939(7) Uani 1 1 d . . . . .
Cl1 Cl 0.5714(2) 0.2141(3) 0.3734(3) 0.1342(10) Uani 1 1 d . . . . .
Sn1 Sn 0.35579(5) 0.18617(5) 0.30073(5) 0.0811(2) Uani 1 1 d . . . . .

```

loop\_

```

_atom_site_aniso_label
_atom_site_aniso_U_11
_atom_site_aniso_U_22
_atom_site_aniso_U_33
_atom_site_aniso_U_23
_atom_site_aniso_U_13
_atom_site_aniso_U_12
C1 0.066(5) 0.080(6) 0.085(5) 0.011(4) 0.014(4) 0.002(4)
C2 0.065(5) 0.077(6) 0.098(6) 0.012(4) -0.004(4) -0.004(4)
C3 0.061(5) 0.086(6) 0.115(7) 0.015(5) -0.009(5) 0.011(4)
C4 0.079(6) 0.091(7) 0.098(6) 0.024(5) 0.030(5) 0.023(5)
C5 0.086(6) 0.103(7) 0.149(9) -0.024(7) -0.031(6) -0.009(5)
C6 0.094(6) 0.114(8) 0.139(8) 0.013(6) 0.022(6) 0.039(6)
C7 0.094(6) 0.131(8) 0.102(7) -0.010(6) 0.031(5) -0.023(6)

```

C8 0.200(13) 0.142(10) 0.150(11) -0.004(8) 0.081(10) -0.027(9)  
C9 0.094(6) 0.114(7) 0.087(6) 0.002(5) 0.003(5) 0.010(5)  
C10 0.287(18) 0.143(10) 0.112(8) 0.026(8) 0.065(11) 0.054(11)  
N1 0.054(3) 0.081(4) 0.073(4) 0.002(3) 0.004(3) -0.001(3)  
N2 0.074(4) 0.086(5) 0.090(5) 0.006(4) 0.014(4) 0.009(4)  
S1 0.0780(13) 0.0972(16) 0.1060(17) -0.0176(13) -0.0059(12) -0.0114(12)  
C11 0.0647(13) 0.166(3) 0.171(3) -0.018(2) -0.0112(15) -0.0021(15)  
Sn1 0.0627(3) 0.0941(4) 0.0869(4) -0.0001(3) 0.0072(2) -0.0036(3)

\_geom\_special\_details

;

All esds (except the esd in the dihedral angle between two l.s. planes) are estimated using the full covariance matrix. The cell esds are taken into account individually in the estimation of esds in distances, angles and torsion angles; correlations between esds in cell parameters are only used when they are defined by crystal symmetry. An approximate (isotropic) treatment of cell esds is used for estimating esds involving l.s. planes.

;

loop\_

\_geom\_bond\_atom\_site\_label\_1

\_geom\_bond\_atom\_site\_label\_2

\_geom\_bond\_distance

\_geom\_bond\_site\_symmetry\_2

\_geom\_bond\_publ\_flag

C1 N2 1.328(9) . ?  
C1 N1 1.352(9) . ?  
C1 S1 1.740(8) . ?  
C2 N1 1.333(9) . ?  
C2 C3 1.360(10) . ?  
C2 C5 1.519(11) . ?  
C3 C4 1.380(12) . ?  
C3 H3 0.9300 . ?  
C4 N2 1.344(11) . ?  
C4 C6 1.495(10) . ?  
C5 H5A 0.9600 . ?  
C5 H5B 0.9600 . ?  
C5 H5C 0.9600 . ?  
C6 H6A 0.9600 . ?  
C6 H6B 0.9600 . ?  
C6 H6C 0.9600 . ?  
C7 C8 1.466(12) . ?  
C7 Sn1 2.120(9) . ?  
C7 H7A 0.9700 . ?  
C7 H7B 0.9700 . ?  
C8 H8A 0.9600 . ?  
C8 H8B 0.9600 . ?  
C8 H8C 0.9600 . ?  
C9 C10 1.424(11) . ?  
C9 Sn1 2.123(9) . ?  
C9 H9A 0.9700 . ?  
C9 H9B 0.9700 . ?

C10 H10A 0.9600 . ?  
C10 H10B 0.9600 . ?  
C10 H10C 0.9600 . ?  
N1 Sn1 2.525(5) . ?  
S1 Sn1 2.452(2) . ?  
Cl1 Sn1 2.438(2) . ?

loop\_

\_geom\_angle\_atom\_site\_label\_1  
\_geom\_angle\_atom\_site\_label\_2  
\_geom\_angle\_atom\_site\_label\_3  
\_geom\_angle  
\_geom\_angle\_site\_symmetry\_1  
\_geom\_angle\_site\_symmetry\_3  
\_geom\_angle\_publ\_flag  
N2 C1 N1 126.4(7) . . ?  
N2 C1 S1 119.3(7) . . ?  
N1 C1 S1 114.4(6) . . ?  
N1 C2 C3 121.0(8) . . ?  
N1 C2 C5 115.6(7) . . ?  
C3 C2 C5 123.5(8) . . ?  
C2 C3 C4 119.0(8) . . ?  
C2 C3 H3 120.5 . . ?  
C4 C3 H3 120.5 . . ?  
N2 C4 C3 121.2(7) . . ?  
N2 C4 C6 116.7(9) . . ?  
C3 C4 C6 122.1(9) . . ?  
C2 C5 H5A 109.5 . . ?  
C2 C5 H5B 109.5 . . ?  
H5A C5 H5B 109.5 . . ?  
C2 C5 H5C 109.5 . . ?  
H5A C5 H5C 109.5 . . ?  
H5B C5 H5C 109.5 . . ?  
C4 C6 H6A 109.5 . . ?  
C4 C6 H6B 109.5 . . ?  
H6A C6 H6B 109.5 . . ?  
C4 C6 H6C 109.5 . . ?  
H6A C6 H6C 109.5 . . ?  
H6B C6 H6C 109.5 . . ?  
C8 C7 Sn1 114.5(7) . . ?  
C8 C7 H7A 108.6 . . ?  
Sn1 C7 H7A 108.6 . . ?  
C8 C7 H7B 108.6 . . ?  
Sn1 C7 H7B 108.6 . . ?  
H7A C7 H7B 107.6 . . ?  
C7 C8 H8A 109.5 . . ?  
C7 C8 H8B 109.5 . . ?  
H8A C8 H8B 109.5 . . ?  
C7 C8 H8C 109.5 . . ?  
H8A C8 H8C 109.5 . . ?  
H8B C8 H8C 109.5 . . ?  
C10 C9 Sn1 116.1(7) . . ?  
C10 C9 H9A 108.3 . . ?  
Sn1 C9 H9A 108.3 . . ?  
C10 C9 H9B 108.3 . . ?  
Sn1 C9 H9B 108.3 . . ?  
H9A C9 H9B 107.4 . . ?  
C9 C10 H10A 109.5 . . ?

C9 C10 H10B 109.5 . . ?  
H10A C10 H10B 109.5 . . ?  
C9 C10 H10C 109.5 . . ?  
H10A C10 H10C 109.5 . . ?  
H10B C10 H10C 109.5 . . ?  
C2 N1 C1 116.5(6) . . ?  
C2 N1 Sn1 149.0(5) . . ?  
C1 N1 Sn1 94.4(4) . . ?  
C1 N2 C4 115.8(7) . . ?  
C1 S1 Sn1 87.9(3) . . ?  
C7 Sn1 C9 128.0(4) . . ?  
C7 Sn1 C11 101.7(3) . . ?  
C9 Sn1 C11 98.7(3) . . ?  
C7 Sn1 S1 112.5(3) . . ?  
C9 Sn1 S1 114.1(2) . . ?  
C11 Sn1 S1 91.48(9) . . ?  
C7 Sn1 N1 90.0(3) . . ?  
C9 Sn1 N1 91.4(3) . . ?  
C11 Sn1 N1 154.60(17) . . ?  
S1 Sn1 N1 63.15(16) . . ?

loop\_

\_geom\_torsion\_atom\_site\_label\_1  
\_geom\_torsion\_atom\_site\_label\_2  
\_geom\_torsion\_atom\_site\_label\_3  
\_geom\_torsion\_atom\_site\_label\_4  
\_geom\_torsion  
\_geom\_torsion\_site\_symmetry\_1  
\_geom\_torsion\_site\_symmetry\_2  
\_geom\_torsion\_site\_symmetry\_3  
\_geom\_torsion\_site\_symmetry\_4  
\_geom\_torsion\_publ\_flag

N1 C2 C3 C4 1.7(13) . . . . ?  
C5 C2 C3 C4 -178.5(8) . . . . ?  
C2 C3 C4 N2 -0.3(13) . . . . ?  
C2 C3 C4 C6 179.0(8) . . . . ?  
C3 C2 N1 C1 -1.2(11) . . . . ?  
C5 C2 N1 C1 178.9(7) . . . . ?  
C3 C2 N1 Sn1 -176.2(7) . . . . ?  
C5 C2 N1 Sn1 3.9(14) . . . . ?  
N2 C1 N1 C2 -0.6(11) . . . . ?  
S1 C1 N1 C2 179.2(5) . . . . ?  
N2 C1 N1 Sn1 176.8(7) . . . . ?  
S1 C1 N1 Sn1 -3.4(5) . . . . ?  
N1 C1 N2 C4 1.9(11) . . . . ?  
S1 C1 N2 C4 -177.9(6) . . . . ?  
C3 C4 N2 C1 -1.4(12) . . . . ?  
C6 C4 N2 C1 179.3(7) . . . . ?  
N2 C1 S1 Sn1 -176.7(6) . . . . ?  
N1 C1 S1 Sn1 3.5(5) . . . . ?

\_refine\_diff\_density\_max 0.671  
\_refine\_diff\_density\_min -0.453  
\_refine\_diff\_density\_rms 0.086

\_shelxl\_version\_number 2014/6

\_shelx\_res\_file

```

;
TITL AT-06
CELL 0.71069 10.6207 11.9070 11.5893 90.000 91.786 90.000
ZERR 4.00 0.0015 0.0045 0.0023 0.000 0.013 0.000
LATT 1
SYMM 1/2 - X, 1/2 + Y, 1/2 - Z
SFAC C H N S CL SN
UNIT 40 68 8 4 4 4
MERG 2
FMAP 2
PLAN 25
SIZE 0.050 0.150 0.150
ACTA
BOND $H
CONF
LIST 4
WPDB -2
L.S. 4
TEMP 25.00
WGHT 0.035100 3.421200
FVAR 0.16364
C1 1 0.135250 0.331186 0.338896 11.00000 0.06591
0.07954 =
0.08519 0.01116 0.01418 0.00187
C2 1 0.010793 0.209496 0.234427 11.00000 0.06506
0.07660 =
0.09814 0.01193 -0.00353 -0.00416
C3 1 -0.089066 0.278517 0.251038 11.00000 0.06094
0.08604 =
0.11545 0.01471 -0.00893 0.01084
AFIX 43
H3 2 -0.168687 0.259843 0.221332 11.00000 -1.20000
AFIX 0
C4 1 -0.070544 0.376632 0.312590 11.00000 0.07936
0.09086 =
0.09757 0.02378 0.03026 0.02280
C5 1 0.001761 0.100972 0.165759 11.00000 0.08588
0.10309 =
0.14937 -0.02403 -0.03096 -0.00942
AFIX 137
H5A 2 0.046562 0.109096 0.095568 11.00000 -1.50000
H5B 2 -0.085093 0.084474 0.147621 11.00000 -1.50000
H5C 2 0.038106 0.040762 0.210690 11.00000 -1.50000
AFIX 0
C6 1 -0.175265 0.457565 0.332723 11.00000 0.09447
0.11442 =
0.13948 0.01289 0.02165 0.03852
AFIX 137
H6A 2 -0.160924 0.494392 0.405641 11.00000 -1.50000
H6B 2 -0.253814 0.417710 0.333338 11.00000 -1.50000
H6C 2 -0.178282 0.512547 0.272116 11.00000 -1.50000
AFIX 0
C7 1 0.375450 0.208240 0.120631 11.00000 0.09396
0.13089 =
0.10225 -0.01045 0.03056 -0.02334
AFIX 23
H7A 2 0.399030 0.136894 0.087163 11.00000 -1.20000
H7B 2 0.294324 0.229435 0.086546 11.00000 -1.20000

```

```

AFIX 0
C8 1 0.468740 0.292956 0.089633 11.00000 0.20036
0.14207 =
0.15035 -0.00355 0.08060 -0.02682
AFIX 137
H8A 2 0.460067 0.357868 0.137871 11.00000 -1.50000
H8B 2 0.455305 0.314048 0.010252 11.00000 -1.50000
H8C 2 0.551919 0.262411 0.100484 11.00000 -1.50000
AFIX 0
C9 1 0.314623 0.035946 0.390671 11.00000 0.09404
0.11389 =
0.08717 0.00160 0.00345 0.00955
AFIX 23
H9A 2 0.257838 -0.008836 0.342326 11.00000 -1.20000
H9B 2 0.392163 -0.006347 0.401410 11.00000 -1.20000
AFIX 0
C10 1 0.259747 0.049458 0.500404 11.00000 0.28657
0.14271 =
0.11233 0.02633 0.06480 0.05417
AFIX 137
H10A 2 0.311015 0.099095 0.547207 11.00000 -1.50000
H10B 2 0.254442 -0.022281 0.537743 11.00000 -1.50000
H10C 2 0.176801 0.080666 0.490215 11.00000 -1.50000
AFIX 0
N1 3 0.124691 0.234027 0.279053 11.00000 0.05357
0.08139 =
0.07260 0.00174 0.00435 -0.00143
N2 3 0.043748 0.404593 0.356523 11.00000 0.07360
0.08613 =
0.09032 0.00617 0.01382 0.00945
S1 4 0.285522 0.357651 0.396538 11.00000 0.07797
0.09719 =
0.10599 -0.01757 -0.00587 -0.01136
CL1 5 0.571416 0.214146 0.373362 11.00000 0.06469
0.16597 =
0.17110 -0.01806 -0.01118 -0.00207
SN1 6 0.355791 0.186170 0.300726 11.00000 0.06275
0.09409 =
0.08688 -0.00013 0.00719 -0.00360
HKLF 4

```

```

REM AT-06
REM R1 = 0.0538 for 1534 Fo > 4sig(Fo) and 0.1392 for all 3364
data
REM 140 parameters refined using 0 restraints

```

END

```

WGHT 0.0351 3.4209

```

```

REM Highest difference peak 0.671, deepest hole -0.453, 1-sigma
level 0.086

```

```

Q1 1 0.4338 0.1880 0.3338 11.00000 0.05 0.67
Q2 1 0.2728 0.1959 0.2673 11.00000 0.05 0.58
Q3 1 0.3566 0.2343 0.2218 11.00000 0.05 0.53
Q4 1 0.3416 0.1572 0.4027 11.00000 0.05 0.53
Q5 1 0.3482 0.2104 0.3902 11.00000 0.05 0.50
Q6 1 0.5016 0.1759 0.4176 11.00000 0.05 0.49

```

|     |   |         |         |        |          |      |      |
|-----|---|---------|---------|--------|----------|------|------|
| Q7  | 1 | 0.3631  | 0.1468  | 0.2001 | 11.00000 | 0.05 | 0.48 |
| Q8  | 1 | 0.2117  | 0.3449  | 0.3645 | 11.00000 | 0.05 | 0.37 |
| Q9  | 1 | 0.5221  | 0.2890  | 0.3425 | 11.00000 | 0.05 | 0.36 |
| Q10 | 1 | 0.4558  | 0.2572  | 0.4128 | 11.00000 | 0.05 | 0.31 |
| Q11 | 1 | 0.5425  | 0.2253  | 0.4989 | 11.00000 | 0.05 | 0.31 |
| Q12 | 1 | 0.1463  | -0.0347 | 0.1994 | 11.00000 | 0.05 | 0.30 |
| Q13 | 1 | -0.0622 | 0.1694  | 0.0996 | 11.00000 | 0.05 | 0.30 |
| Q14 | 1 | 0.2230  | 0.2181  | 0.1771 | 11.00000 | 0.05 | 0.29 |
| Q15 | 1 | 0.2204  | 0.1607  | 0.1752 | 11.00000 | 0.05 | 0.28 |
| Q16 | 1 | 0.0112  | 0.1899  | 0.1600 | 11.00000 | 0.05 | 0.28 |
| Q17 | 1 | 0.3591  | 0.2829  | 0.0888 | 11.00000 | 0.05 | 0.26 |
| Q18 | 1 | -0.0197 | 0.4400  | 0.3194 | 11.00000 | 0.05 | 0.26 |
| Q19 | 1 | 0.6016  | 0.2261  | 0.4621 | 11.00000 | 0.05 | 0.25 |
| Q20 | 1 | 0.0020  | 0.1789  | 0.3214 | 11.00000 | 0.05 | 0.25 |
| Q21 | 1 | 0.3590  | 0.0464  | 0.4616 | 11.00000 | 0.05 | 0.25 |
| Q22 | 1 | 0.2936  | 0.3578  | 0.3078 | 11.00000 | 0.05 | 0.25 |
| Q23 | 1 | 0.1508  | 0.2193  | 0.2155 | 11.00000 | 0.05 | 0.24 |
| Q24 | 1 | 0.1238  | 0.0577  | 0.1827 | 11.00000 | 0.05 | 0.24 |
| Q25 | 1 | 0.2120  | 0.0265  | 0.3848 | 11.00000 | 0.05 | 0.24 |

;

\_shelx\_res\_checksum 13325

\_shelx\_hkl\_file

;

|   |    |    |         |      |
|---|----|----|---------|------|
| 1 | 0  | -1 | 1220.78 | 3.33 |
| 1 | -1 | 0  | 200.00  | 1.38 |
| 1 | 1  | 0  | 197.33  | 1.37 |
| 1 | 0  | 1  | 507.18  | 2.19 |
| 1 | 1  | -1 | 1.08    | 0.17 |
| 1 | -1 | -1 | 0.82    | 0.19 |
| 1 | 1  | 1  | 380.16  | 2.08 |
| 1 | -1 | 1  | 395.82  | 2.13 |
| 0 | 2  | 0  | 1247.69 | 4.66 |
| 0 | -2 | 0  | 1241.92 | 4.64 |
| 0 | 0  | 2  | 1040.80 | 3.65 |
| 0 | 0  | -2 | 990.33  | 3.56 |
| 2 | 0  | 0  | 1.27    | 0.21 |
| 0 | -2 | -1 | 156.77  | 1.66 |
| 0 | 2  | 1  | 158.56  | 1.67 |
| 0 | -2 | 1  | 160.79  | 1.74 |
| 0 | 2  | -1 | 159.60  | 1.74 |
| 0 | 1  | 2  | 871.48  | 3.51 |
| 0 | -1 | -2 | 873.56  | 3.52 |
| 0 | 1  | -2 | 877.62  | 3.63 |
| 0 | -1 | 2  | 888.32  | 3.65 |
| 1 | 2  | 0  | 141.45  | 1.51 |
| 1 | -2 | 0  | 140.73  | 1.52 |
| 1 | 0  | -2 | 0.48    | 0.23 |
| 1 | 0  | 2  | 0.26    | 0.35 |
| 2 | 0  | -1 | -0.39   | 0.40 |
| 2 | -1 | 0  | 585.65  | 3.01 |
| 2 | 1  | 0  | 578.48  | 2.97 |
| 2 | 0  | 1  | 0.07    | 0.37 |
| 1 | -2 | -1 | 466.99  | 2.94 |
| 1 | 2  | -1 | 443.06  | 2.86 |
| 1 | 1  | -2 | 9.29    | 0.65 |
| 1 | -1 | -2 | 10.50   | 0.69 |
| 1 | -2 | 1  | 167.68  | 1.72 |

|    |    |    |         |      |
|----|----|----|---------|------|
| 1  | 2  | 1  | 162.88  | 1.65 |
| 1  | 1  | 2  | 81.69   | 1.19 |
| 1  | -1 | 2  | 90.89   | 1.25 |
| 2  | -1 | -1 | 14.21   | 0.64 |
| 2  | 1  | -1 | 15.01   | 0.64 |
| 2  | 1  | 1  | 84.04   | 1.24 |
| 2  | -1 | 1  | 87.82   | 1.27 |
| 0  | -2 | -2 | 522.75  | 3.18 |
| 0  | 2  | 2  | 526.24  | 3.18 |
| 0  | 2  | -2 | 533.24  | 3.33 |
| 0  | -2 | 2  | 534.14  | 3.34 |
| 2  | 0  | -2 | 13.24   | 0.67 |
| -2 | 0  | 2  | 12.79   | 0.78 |
| 0  | -3 | 0  | 2.43    | 0.39 |
| 0  | 3  | 0  | 3.01    | 0.38 |
| 2  | 2  | 0  | 67.44   | 1.20 |
| -2 | 2  | 0  | 73.47   | 1.43 |
| 2  | -2 | 0  | 70.73   | 1.24 |
| -2 | -2 | 0  | 71.64   | 1.41 |
| 1  | -2 | -2 | 1003.07 | 5.17 |
| -1 | 2  | 2  | 1007.28 | 5.91 |
| 1  | 2  | -2 | 969.49  | 5.02 |
| -1 | -2 | 2  | 957.32  | 5.70 |
| 0  | 0  | -3 | 0.10    | 0.46 |
| 0  | 0  | 3  | -0.11   | 0.45 |
| -2 | 0  | -2 | 179.72  | 2.16 |
| 2  | 0  | 2  | 131.25  | 1.64 |
| -1 | -2 | -2 | 30.91   | 1.04 |
| 1  | 2  | 2  | 26.00   | 0.83 |
| 1  | -2 | 2  | 28.91   | 0.89 |
| -1 | 2  | -2 | 32.44   | 1.05 |
| -2 | -2 | 1  | 1.32    | 0.39 |
| 2  | -2 | -1 | 1.10    | 0.30 |
| 2  | 2  | -1 | 0.25    | 0.51 |
| -2 | 2  | 1  | 0.65    | 0.58 |
| -2 | 1  | 2  | 84.15   | 1.54 |
| 2  | -1 | -2 | 81.57   | 1.38 |
| 2  | 1  | -2 | 80.58   | 1.37 |
| -2 | -1 | 2  | 79.47   | 1.51 |
| 0  | -3 | 1  | 0.24    | 0.59 |
| 0  | 3  | -1 | -0.83   | 0.64 |
| 0  | -3 | -1 | 2.70    | 0.38 |
| 0  | 3  | 1  | 1.66    | 0.33 |
| -2 | -2 | -1 | 19.27   | 0.91 |
| 2  | 2  | 1  | 17.10   | 0.73 |
| 2  | -2 | 1  | 17.75   | 0.74 |
| -2 | 2  | -1 | 19.31   | 0.85 |
| -1 | 3  | 0  | 266.29  | 2.89 |
| -1 | -3 | 0  | 263.34  | 2.85 |
| 1  | -3 | 0  | 264.22  | 2.53 |
| 1  | 3  | 0  | 256.57  | 2.45 |
| 0  | -1 | -3 | 33.02   | 0.94 |
| 0  | 1  | 3  | 32.77   | 0.92 |
| 0  | -1 | 3  | 33.39   | 0.97 |
| 0  | 1  | -3 | 33.49   | 0.98 |
| 2  | 1  | 2  | 371.06  | 2.75 |
| -2 | -1 | -2 | 503.17  | 3.63 |
| 1  | 0  | -3 | 163.97  | 1.95 |



|    |    |    |        |      |
|----|----|----|--------|------|
| -1 | 0  | 3  | 167.79 | 2.26 |
| 2  | -1 | 2  | 384.98 | 2.82 |
| -2 | 1  | -2 | 510.94 | 3.70 |
| -1 | 0  | -3 | 115.18 | 1.84 |
| 1  | 0  | 3  | 84.24  | 1.39 |
| 1  | -3 | -1 | 297.58 | 2.87 |
| -1 | 3  | 1  | 293.05 | 3.25 |
| -1 | -3 | 1  | 279.66 | 3.15 |
| 1  | 3  | -1 | 277.99 | 2.76 |
| 3  | 0  | 0  | 0.43   | 0.45 |
| -3 | 0  | 0  | -1.42  | 0.59 |
| 1  | -3 | 1  | 35.32  | 1.04 |
| -1 | 3  | -1 | 38.93  | 1.25 |
| -1 | -3 | -1 | 37.31  | 1.17 |
| 1  | 3  | 1  | 34.27  | 1.00 |
| 1  | -1 | -3 | 509.48 | 3.42 |
| -1 | 1  | 3  | 520.93 | 3.95 |
| 1  | 1  | -3 | 499.05 | 3.78 |
| -1 | -1 | 3  | 508.53 | 4.34 |
| 1  | -1 | 3  | 41.54  | 1.01 |
| -1 | -1 | -3 | 50.01  | 1.28 |
| 1  | 1  | 3  | 38.95  | 1.01 |
| -1 | 1  | -3 | 49.23  | 1.29 |
| -3 | 0  | 1  | 23.67  | 1.02 |
| 3  | 0  | -1 | 26.48  | 0.89 |
| -3 | 1  | 0  | 209.30 | 2.50 |
| 3  | -1 | 0  | 203.18 | 2.16 |
| -3 | -1 | 0  | 202.48 | 2.44 |
| 3  | 1  | 0  | 201.23 | 2.14 |
| 3  | 0  | 1  | 146.40 | 1.85 |
| -3 | 0  | -1 | 146.78 | 2.12 |
| -2 | 2  | 2  | -0.77  | 0.67 |
| 2  | -2 | -2 | 0.61   | 0.57 |
| 2  | 2  | -2 | 0.14   | 0.54 |
| -2 | -2 | 2  | 0.12   | 0.56 |
| -3 | 1  | 1  | 198.01 | 2.48 |
| -3 | -1 | 1  | 195.23 | 2.45 |
| 3  | 1  | -1 | 191.14 | 2.12 |
| 3  | -1 | -1 | 197.69 | 2.18 |
| 0  | -3 | -2 | -0.06  | 0.61 |
| 0  | 3  | 2  | -0.29  | 0.55 |
| 0  | 3  | -2 | -0.79  | 0.60 |
| 0  | -3 | 2  | 0.10   | 0.59 |
| 0  | -2 | -3 | 195.64 | 2.20 |
| 0  | 2  | 3  | 196.40 | 2.19 |
| 0  | -2 | 3  | 200.47 | 2.29 |
| 0  | 2  | -3 | 194.60 | 2.26 |
| 2  | 2  | 2  | 24.22  | 0.87 |
| -2 | -2 | -2 | 28.25  | 1.09 |
| -2 | 2  | -2 | 28.56  | 1.07 |
| 2  | -2 | 2  | 21.88  | 0.88 |
| -3 | -1 | -1 | 860.85 | 5.05 |
| 3  | 1  | 1  | 814.74 | 4.32 |
| -3 | 1  | -1 | 875.61 | 5.14 |
| 3  | -1 | 1  | 830.70 | 4.41 |
| 2  | -3 | 0  | 2.46   | 0.34 |
| -2 | 3  | 0  | 3.27   | 0.46 |
| -2 | -3 | 0  | 2.17   | 0.47 |

|    |    |    |        |      |
|----|----|----|--------|------|
| 2  | 3  | 0  | 3.15   | 0.32 |
| -2 | 0  | 3  | 0.54   | 0.61 |
| 2  | 0  | -3 | -1.20  | 0.58 |
| -1 | 3  | 2  | 236.19 | 3.31 |
| 1  | -3 | -2 | 240.65 | 2.89 |
| 1  | 3  | -2 | 230.57 | 2.82 |
| -1 | -3 | 2  | 223.39 | 3.15 |
| -1 | 2  | 3  | 354.84 | 3.83 |
| 1  | -2 | -3 | 362.03 | 3.37 |
| -1 | -2 | 3  | 351.56 | 3.94 |
| 1  | 2  | -3 | 355.90 | 3.48 |
| 1  | 3  | 2  | 80.41  | 1.47 |
| -1 | -3 | -2 | 87.30  | 1.77 |
| 1  | -3 | 2  | 90.46  | 1.61 |
| -1 | 3  | -2 | 91.74  | 1.84 |
| -2 | -3 | 1  | 526.28 | 4.25 |
| 2  | -3 | -1 | 534.33 | 3.77 |
| 2  | 3  | -1 | 524.89 | 3.72 |
| -2 | 3  | 1  | 537.66 | 4.30 |
| 2  | 0  | 3  | 0.02   | 0.45 |
| -1 | -2 | -3 | 5.73   | 0.51 |
| 1  | 2  | 3  | 5.13   | 0.42 |
| -2 | 0  | -3 | -0.82  | 0.55 |
| 1  | -2 | 3  | 5.84   | 0.57 |
| -1 | 2  | -3 | 4.52   | 0.48 |
| -2 | 1  | 3  | 5.15   | 0.54 |
| 2  | -1 | -3 | 5.57   | 0.48 |
| 2  | 1  | -3 | 5.24   | 0.50 |
| 3  | 0  | -2 | 0.21   | 0.49 |
| -3 | 0  | 2  | 0.67   | 0.49 |
| -2 | -1 | 3  | 4.34   | 0.56 |
| 2  | 3  | 1  | 89.52  | 1.58 |
| -2 | -3 | -1 | 95.97  | 1.85 |
| -2 | 3  | -1 | 98.14  | 1.88 |
| 2  | -3 | 1  | 93.06  | 1.62 |
| -3 | -2 | 0  | 71.80  | 1.59 |
| 3  | -2 | 0  | 69.76  | 1.39 |
| 3  | 2  | 0  | 67.70  | 1.37 |
| -3 | 2  | 0  | 70.81  | 1.63 |
| -2 | -1 | -3 | 37.67  | 1.26 |
| 3  | 0  | 2  | -1.08  | 0.57 |
| 2  | -1 | 3  | 25.22  | 0.97 |
| 2  | 1  | 3  | 23.10  | 0.90 |
| -3 | 0  | -2 | -1.04  | 0.65 |
| -2 | 1  | -3 | 38.47  | 1.29 |
| 0  | 4  | 0  | 4.08   | 0.44 |
| 0  | -4 | 0  | 3.16   | 0.43 |
| -3 | -1 | 2  | 102.72 | 1.93 |
| 3  | 1  | -2 | 105.33 | 1.70 |
| 3  | -1 | -2 | 106.38 | 1.72 |
| -3 | 1  | 2  | 107.32 | 1.96 |
| -3 | -2 | 1  | 0.05   | 0.57 |
| 3  | -2 | -1 | -0.14  | 0.50 |
| 3  | 2  | -1 | 0.54   | 0.51 |
| -3 | 2  | 1  | 0.54   | 0.60 |
| 3  | 2  | 1  | 30.23  | 1.02 |
| -3 | -2 | -1 | 29.76  | 1.13 |
| 3  | -2 | 1  | 28.09  | 1.02 |

|    |    |    |        |      |
|----|----|----|--------|------|
| -3 | 2  | -1 | 27.34  | 1.14 |
| 0  | 0  | -4 | 63.39  | 1.37 |
| 0  | 0  | 4  | 67.04  | 1.40 |
| 3  | -1 | 2  | 48.20  | 1.22 |
| -3 | 1  | -2 | 56.59  | 1.53 |
| -3 | -1 | -2 | 56.30  | 1.49 |
| 3  | 1  | 2  | 45.39  | 1.21 |
| 0  | 4  | 1  | 533.37 | 4.32 |
| 0  | -4 | -1 | 541.72 | 4.33 |
| 0  | -4 | 1  | 537.55 | 4.35 |
| 0  | 4  | -1 | 541.28 | 4.35 |
| -1 | 4  | 0  | 81.48  | 1.96 |
| 1  | 4  | 0  | 79.90  | 1.71 |
| 1  | -4 | 0  | 85.20  | 1.79 |
| -1 | -4 | 0  | 79.26  | 1.91 |
| 1  | 0  | -4 | 0.05   | 0.39 |
| -1 | 0  | 4  | -0.02  | 0.61 |
| 0  | -1 | 4  | 541.33 | 3.84 |
| 0  | 1  | -4 | 535.00 | 3.83 |
| 0  | 1  | 4  | 518.60 | 3.71 |
| 0  | -1 | -4 | 510.44 | 3.68 |
| 2  | -3 | -2 | 72.54  | 1.58 |
| -2 | 3  | 2  | 75.77  | 1.84 |
| -2 | -3 | 2  | 71.97  | 1.80 |
| 2  | 3  | -2 | 72.64  | 1.63 |
| 2  | -2 | -3 | 268.09 | 2.84 |
| -2 | 2  | 3  | 260.51 | 3.21 |
| -2 | -2 | 3  | 243.20 | 3.19 |
| 2  | 2  | -3 | 259.38 | 2.90 |
| 1  | -4 | -1 | 6.23   | 0.59 |
| -1 | 4  | 1  | 7.09   | 0.63 |
| 1  | 4  | -1 | 5.53   | 0.45 |
| -1 | -4 | 1  | 6.27   | 0.66 |
| 1  | 4  | 1  | 20.52  | 0.99 |
| -1 | -4 | -1 | 22.29  | 1.14 |
| 1  | -4 | 1  | 22.71  | 1.04 |
| -1 | 4  | -1 | 20.14  | 1.17 |
| 1  | 0  | 4  | -0.61  | 0.50 |
| -1 | 0  | -4 | -0.13  | 0.58 |
| 0  | -3 | -3 | 169.75 | 2.28 |
| 0  | 3  | 3  | 166.11 | 2.26 |
| -2 | -3 | -2 | 0.85   | 0.58 |
| 0  | 3  | -3 | 169.15 | 2.37 |
| 2  | 3  | 2  | 0.36   | 0.46 |
| 0  | -3 | 3  | 166.95 | 2.34 |
| 2  | -3 | 2  | 0.31   | 0.50 |
| -2 | 3  | -2 | 0.22   | 0.55 |
| -1 | -1 | 4  | 114.75 | 2.27 |
| 1  | 1  | -4 | 122.04 | 2.03 |
| 1  | -1 | -4 | 107.11 | 1.81 |
| -1 | 1  | 4  | 117.24 | 2.13 |
| 2  | 2  | 3  | 8.97   | 0.72 |
| -2 | -2 | -3 | 11.06  | 0.88 |
| 2  | -2 | 3  | 9.09   | 0.72 |
| -2 | 2  | -3 | 12.67  | 0.84 |
| -3 | 2  | 2  | 28.01  | 1.18 |
| 3  | -2 | -2 | 28.13  | 1.05 |
| 3  | 2  | -2 | 28.37  | 1.05 |

|    |    |    |        |      |
|----|----|----|--------|------|
| -3 | -2 | 2  | 30.63  | 1.17 |
| -1 | -1 | -4 | 50.96  | 1.46 |
| 1  | 1  | 4  | 41.11  | 1.14 |
| 1  | -1 | 4  | 42.29  | 1.17 |
| -1 | 1  | -4 | 50.54  | 1.48 |
| 1  | -3 | -3 | 135.59 | 2.36 |
| -1 | 3  | 3  | 130.87 | 2.65 |
| -1 | -3 | 3  | 130.75 | 2.66 |
| 1  | 3  | -3 | 136.22 | 2.38 |
| 1  | 3  | 3  | 0.58   | 0.39 |
| -3 | -2 | -2 | 63.96  | 1.65 |
| -1 | -3 | -3 | 1.00   | 0.67 |
| 3  | 2  | 2  | 53.38  | 1.34 |
| 3  | -2 | 2  | 59.88  | 1.40 |
| 1  | -3 | 3  | 0.30   | 0.54 |
| -3 | 2  | -2 | 64.35  | 1.64 |
| -1 | 3  | -3 | 0.86   | 0.62 |
| -4 | 0  | 0  | 363.80 | 3.67 |
| 4  | 0  | 0  | 354.26 | 3.19 |
| 3  | 0  | -3 | 4.54   | 0.40 |
| -3 | 0  | 3  | 4.48   | 0.52 |
| 0  | 4  | 2  | 9.21   | 0.89 |
| 0  | -4 | -2 | 8.23   | 0.65 |
| 0  | -4 | 2  | 8.65   | 0.63 |
| 0  | 4  | -2 | 8.99   | 0.85 |
| -3 | -3 | 0  | 236.12 | 3.01 |
| 3  | 3  | 0  | 241.07 | 2.69 |
| -3 | 3  | 0  | 234.59 | 3.04 |
| 3  | -3 | 0  | 240.45 | 2.70 |
| 4  | 0  | -1 | -0.97  | 0.57 |
| 0  | -2 | -4 | 8.42   | 0.76 |
| -4 | 0  | 1  | 0.45   | 0.60 |
| 0  | 2  | 4  | 9.17   | 0.69 |
| 0  | -2 | 4  | 9.78   | 0.79 |
| 0  | 2  | -4 | 9.07   | 0.77 |
| -2 | -4 | 0  | 5.49   | 0.59 |
| 2  | 4  | 0  | 4.68   | 0.40 |
| -2 | 4  | 0  | 5.90   | 0.55 |
| 2  | -4 | 0  | 5.98   | 0.51 |
| 4  | 1  | 0  | 342.79 | 3.18 |
| -4 | 1  | 0  | 354.92 | 3.70 |
| -4 | -1 | 0  | 354.63 | 3.66 |
| 4  | -1 | 0  | 353.77 | 3.26 |
| -3 | 3  | 1  | 1.18   | 0.50 |
| -3 | -3 | 1  | 1.44   | 0.46 |
| 3  | 3  | -1 | 0.24   | 0.58 |
| 3  | -3 | -1 | 0.27   | 0.62 |
| -3 | 1  | 3  | 119.75 | 2.22 |
| 3  | 1  | -3 | 115.84 | 1.93 |
| -3 | -1 | 3  | 115.76 | 2.18 |
| 3  | -1 | -3 | 122.07 | 1.98 |
| 1  | -4 | -2 | 585.06 | 4.88 |
| -1 | 4  | 2  | 565.31 | 5.47 |
| 1  | 4  | -2 | 565.55 | 4.73 |
| -1 | -4 | 2  | 563.07 | 5.39 |
| -2 | 0  | 4  | 365.30 | 3.90 |
| 2  | 0  | -4 | 372.91 | 3.48 |
| 3  | 0  | 3  | 361.76 | 3.30 |

|    |    |    |        |      |
|----|----|----|--------|------|
| 4  | 0  | 1  | 0.95   | 0.34 |
| -3 | 0  | -3 | 500.00 | 4.38 |
| -4 | 0  | -1 | 0.19   | 0.69 |
| -3 | -3 | -1 | 3.30   | 0.51 |
| 3  | 3  | 1  | 3.38   | 0.35 |
| 3  | -3 | 1  | 3.67   | 0.36 |
| -1 | -4 | -2 | 63.13  | 1.76 |
| 1  | 4  | 2  | 59.56  | 1.46 |
| -3 | 3  | -1 | 3.52   | 0.49 |
| 1  | -4 | 2  | 61.40  | 1.55 |
| -1 | 4  | -2 | 63.37  | 1.79 |
| 1  | -2 | -4 | 578.01 | 4.31 |
| -1 | 2  | 4  | 571.72 | 4.88 |
| -1 | -2 | 4  | 569.21 | 5.25 |
| 1  | 2  | -4 | 566.58 | 4.61 |
| 4  | 1  | -1 | 34.03  | 1.14 |
| -4 | -1 | 1  | 36.69  | 1.35 |
| -4 | 1  | 1  | 36.86  | 1.35 |
| 4  | -1 | -1 | 38.52  | 1.18 |
| -2 | 4  | 1  | 14.62  | 1.09 |
| 2  | 4  | -1 | 14.27  | 0.96 |
| -2 | -4 | 1  | 14.17  | 1.15 |
| 2  | -4 | -1 | 15.47  | 1.01 |
| 2  | 4  | 1  | 0.73   | 0.31 |
| -2 | -4 | -1 | 0.84   | 0.64 |
| -2 | 4  | -1 | -1.29  | 0.75 |
| 2  | -4 | 1  | 0.41   | 0.59 |
| -2 | 1  | 4  | 18.26  | 1.09 |
| 2  | -1 | -4 | 17.17  | 1.00 |
| -2 | -1 | 4  | 18.74  | 1.22 |
| 2  | 1  | -4 | 19.36  | 1.10 |
| 1  | 2  | 4  | 11.13  | 0.81 |
| -1 | -2 | -4 | 13.52  | 0.92 |
| 4  | 1  | 1  | 0.69   | 0.34 |
| -4 | -1 | -1 | -0.27  | 0.68 |
| -1 | 2  | -4 | 14.98  | 0.98 |
| 1  | -2 | 4  | 11.95  | 0.80 |
| 4  | -1 | 1  | 0.86   | 0.34 |
| -3 | -1 | -3 | 30.08  | 1.27 |
| -3 | 1  | -3 | 29.92  | 1.25 |
| -4 | 1  | -1 | 0.56   | 0.50 |
| 3  | 1  | 3  | 24.57  | 1.00 |
| 3  | -1 | 3  | 23.06  | 1.02 |
| 2  | 0  | 4  | 180.32 | 2.38 |
| -2 | 0  | -4 | 254.37 | 3.19 |
| 2  | -3 | -3 | 74.72  | 1.79 |
| -2 | 3  | 3  | 74.17  | 2.03 |
| -2 | -3 | 3  | 68.34  | 1.96 |
| 2  | 3  | -3 | 72.38  | 1.80 |
| 2  | -1 | 4  | 58.82  | 1.43 |
| -2 | -1 | -4 | 75.27  | 1.80 |
| 2  | 1  | 4  | 53.65  | 1.40 |
| -2 | 1  | -4 | 73.48  | 1.82 |
| 4  | 0  | -2 | 1.26   | 0.37 |
| -4 | 0  | 2  | -1.29  | 0.69 |
| -2 | -3 | -3 | 245.42 | 3.18 |
| 2  | 3  | 3  | 169.36 | 2.35 |
| -2 | 3  | -3 | 245.27 | 3.25 |

|    |    |    |         |      |
|----|----|----|---------|------|
| 2  | -3 | 3  | 196.20  | 2.57 |
| 3  | -3 | -2 | 405.33  | 3.66 |
| -3 | 3  | 2  | 396.17  | 4.13 |
| -4 | -2 | 0  | 330.70  | 3.68 |
| 3  | 3  | -2 | 394.49  | 3.63 |
| 4  | 2  | 0  | 319.94  | 3.21 |
| -4 | 2  | 0  | 328.66  | 3.69 |
| 4  | -2 | 0  | 326.32  | 3.25 |
| -3 | -3 | 2  | 383.74  | 4.07 |
| -3 | -2 | 3  | 7.30    | 0.59 |
| 3  | 2  | -3 | 6.22    | 0.55 |
| 3  | -2 | -3 | 6.37    | 0.54 |
| -3 | 2  | 3  | 6.89    | 0.61 |
| 4  | -1 | -2 | 266.97  | 2.96 |
| 4  | 1  | -2 | 257.96  | 2.90 |
| -4 | -1 | 2  | 258.68  | 3.29 |
| -4 | 1  | 2  | 261.96  | 3.33 |
| 4  | -2 | -1 | 170.79  | 2.41 |
| -4 | 2  | 1  | 164.97  | 2.69 |
| -4 | -2 | 1  | 166.69  | 2.69 |
| 4  | 2  | -1 | 169.07  | 2.39 |
| 4  | 0  | 2  | 1246.96 | 6.31 |
| -4 | 0  | -2 | 1456.37 | 7.70 |
| 3  | 3  | 2  | 82.48   | 1.71 |
| -3 | -3 | -2 | 104.42  | 2.19 |
| 2  | -4 | -2 | 7.36    | 0.61 |
| -2 | 4  | 2  | 6.34    | 0.71 |
| 0  | -5 | 0  | -0.43   | 0.77 |
| 2  | 4  | -2 | 5.06    | 0.48 |
| 0  | 5  | 0  | -0.56   | 0.81 |
| -3 | 3  | -2 | 102.38  | 2.15 |
| 3  | -3 | 2  | 98.13   | 1.86 |
| -2 | -4 | 2  | 5.08    | 0.69 |
| -2 | 2  | 4  | 115.46  | 2.57 |
| 2  | -2 | -4 | 125.74  | 2.36 |
| 2  | 2  | -4 | 112.66  | 2.29 |
| -2 | -2 | 4  | 114.19  | 2.63 |
| 3  | 2  | 3  | 159.36  | 2.32 |
| -3 | -2 | -3 | 207.08  | 3.01 |
| -4 | -2 | -1 | 162.35  | 2.67 |
| 4  | 2  | 1  | 162.59  | 2.33 |
| 0  | -4 | -3 | 145.85  | 2.40 |
| 4  | -2 | 1  | 159.34  | 2.35 |
| 3  | -2 | 3  | 164.37  | 2.40 |
| 0  | 4  | 3  | 140.00  | 2.34 |
| -4 | 2  | -1 | 158.37  | 2.65 |
| -3 | 2  | -3 | 203.75  | 2.97 |
| -2 | -4 | -2 | 23.92   | 1.26 |
| 2  | 4  | 2  | 22.00   | 1.00 |
| 0  | 4  | -3 | 150.17  | 2.52 |
| 0  | -4 | 3  | 146.00  | 2.50 |
| -2 | 4  | -2 | 26.84   | 1.24 |
| 2  | -4 | 2  | 22.48   | 1.04 |
| 0  | -3 | -4 | 63.01   | 1.60 |
| 0  | 3  | 4  | 65.68   | 1.62 |
| -4 | 1  | -2 | 32.07   | 1.40 |
| 4  | 1  | 2  | 28.00   | 1.14 |
| -4 | -1 | -2 | 34.57   | 1.35 |

|    |    |    |        |      |
|----|----|----|--------|------|
| 0  | 3  | -4 | 64.79  | 1.67 |
| 4  | -1 | 2  | 28.48  | 1.18 |
| 0  | -3 | 4  | 65.92  | 1.67 |
| 0  | 5  | 1  | 139.34 | 2.58 |
| 0  | -5 | -1 | 145.72 | 2.59 |
| 0  | -5 | 1  | 150.10 | 2.64 |
| 0  | 5  | -1 | 148.27 | 2.61 |
| 1  | 5  | 0  | 145.01 | 2.52 |
| -1 | 5  | 0  | 147.45 | 2.96 |
| 1  | -5 | 0  | 152.75 | 2.63 |
| -1 | -5 | 0  | 149.83 | 2.94 |
| 0  | 0  | 5  | -0.64  | 0.55 |
| 0  | 0  | -5 | -0.61  | 0.57 |
| 2  | 2  | 4  | 60.67  | 1.52 |
| -2 | -2 | -4 | 79.62  | 1.95 |
| 2  | -2 | 4  | 64.56  | 1.56 |
| -2 | 2  | -4 | 78.70  | 1.94 |
| 1  | -4 | -3 | 41.77  | 1.56 |
| -1 | 4  | 3  | 42.69  | 1.85 |
| -1 | -4 | 3  | 41.01  | 1.86 |
| 1  | 4  | -3 | 42.87  | 1.59 |
| 1  | -3 | -4 | 183.27 | 2.78 |
| -1 | 3  | 4  | 184.63 | 3.15 |
| -1 | -3 | 4  | 186.53 | 3.34 |
| 1  | 3  | -4 | 186.98 | 2.94 |
| 1  | 4  | 3  | 3.03   | 0.41 |
| -1 | -4 | -3 | 4.15   | 0.58 |
| -1 | 4  | -3 | 3.41   | 0.60 |
| 1  | -4 | 3  | 3.94   | 0.43 |
| 1  | -5 | -1 | 0.75   | 0.82 |
| -1 | 5  | 1  | 0.44   | 0.90 |
| 1  | 5  | -1 | 1.11   | 0.79 |
| -1 | -5 | 1  | 0.38   | 0.92 |
| -3 | -4 | 0  | 98.60  | 2.22 |
| 3  | 4  | 0  | 100.40 | 1.98 |
| 3  | -4 | 0  | 103.00 | 1.99 |
| -1 | 0  | 5  | 47.50  | 1.52 |
| -3 | 4  | 0  | 95.05  | 2.17 |
| 1  | 0  | -5 | 48.54  | 1.37 |
| 3  | 0  | -4 | -0.46  | 0.57 |
| -3 | 0  | 4  | 0.16   | 0.70 |
| -1 | 5  | -1 | 100.39 | 2.43 |
| -1 | -5 | -1 | 102.04 | 2.43 |
| 1  | 5  | 1  | 97.59  | 2.09 |
| 1  | -5 | 1  | 104.50 | 2.14 |
| 0  | 1  | 5  | 51.47  | 1.40 |
| 1  | 3  | 4  | 184.24 | 2.56 |
| -1 | -3 | -4 | 229.47 | 3.23 |
| 0  | 1  | -5 | 51.59  | 1.45 |
| 0  | -1 | 5  | 52.66  | 1.43 |
| 0  | -1 | -5 | 52.41  | 1.44 |
| 1  | -3 | 4  | 217.26 | 2.83 |
| -1 | 3  | -4 | 231.74 | 3.31 |
| -4 | -2 | 2  | 32.68  | 1.41 |
| -4 | 2  | 2  | 32.63  | 1.40 |
| 4  | 2  | -2 | 34.28  | 1.21 |
| 4  | -2 | -2 | 34.66  | 1.26 |
| 1  | 0  | 5  | 68.79  | 1.61 |

|    |    |    |        |      |
|----|----|----|--------|------|
| -1 | 0  | -5 | 84.80  | 2.05 |
| -3 | -4 | 1  | 8.32   | 0.67 |
| -3 | 4  | 1  | 7.28   | 0.70 |
| 3  | -4 | -1 | 8.59   | 0.84 |
| 3  | 4  | -1 | 8.93   | 0.81 |
| 1  | -1 | -5 | 243.59 | 2.92 |
| -1 | 1  | 5  | 263.19 | 3.45 |
| 1  | 1  | -5 | 275.94 | 3.25 |
| -1 | -1 | 5  | 266.49 | 3.61 |
| -3 | 1  | 4  | 11.03  | 1.00 |
| -3 | -1 | 4  | 9.28   | 0.72 |
| 3  | 1  | -4 | 10.85  | 0.85 |
| 3  | -1 | -4 | 10.43  | 0.91 |
| -3 | -4 | -1 | 6.48   | 0.63 |
| 3  | 4  | 1  | 6.59   | 0.55 |
| -3 | 4  | -1 | -6.55  | 1.43 |
| 3  | -4 | 1  | -1.56  | 1.13 |
| -4 | 0  | 3  | -0.23  | 0.75 |
| 4  | 0  | -3 | -1.67  | 0.69 |
| 4  | 2  | 2  | 282.54 | 3.17 |
| -4 | -2 | -2 | 336.87 | 3.89 |
| -4 | 2  | -2 | 332.01 | 3.90 |
| 4  | -2 | 2  | 310.35 | 3.36 |
| 1  | 1  | 5  | 64.92  | 1.57 |
| -1 | -1 | -5 | 83.38  | 2.03 |
| -1 | 1  | -5 | 82.62  | 2.06 |
| 1  | -1 | 5  | 71.38  | 1.71 |
| 3  | 0  | 4  | 0.14   | 0.62 |
| -3 | 0  | -4 | 0.34   | 0.73 |
| -4 | 3  | 0  | 4.67   | 0.61 |
| 4  | -3 | 0  | 6.49   | 0.54 |
| 4  | 3  | 0  | 4.72   | 0.45 |
| -4 | -3 | 0  | 6.25   | 0.61 |
| 3  | -3 | -3 | 27.53  | 1.19 |
| -3 | 3  | 3  | 28.20  | 1.38 |
| -3 | -3 | 3  | 28.28  | 1.32 |
| 0  | -5 | -2 | 37.69  | 1.51 |
| 0  | 5  | 2  | 37.53  | 1.50 |
| 3  | 3  | -3 | 29.04  | 1.23 |
| 0  | 5  | -2 | 35.87  | 1.48 |
| 0  | -5 | 2  | 37.09  | 1.50 |
| -4 | 1  | 3  | 107.71 | 2.35 |
| 4  | -1 | -3 | 111.51 | 2.09 |
| -4 | -1 | 3  | 109.46 | 2.31 |
| 4  | 1  | -3 | 109.09 | 2.04 |
| -4 | 3  | 1  | 278.96 | 3.65 |
| 4  | 3  | -1 | 278.70 | 3.22 |
| -4 | -3 | 1  | 282.62 | 3.66 |
| 4  | -3 | -1 | 283.18 | 3.22 |
| 2  | 5  | 0  | 78.05  | 1.90 |
| -2 | -5 | 0  | 78.67  | 2.15 |
| 2  | -5 | 0  | 81.86  | 1.90 |
| -2 | 5  | 0  | 79.86  | 2.14 |
| -3 | -1 | -4 | -1.90  | 0.83 |
| 3  | 1  | 4  | 0.08   | 0.64 |
| 3  | -1 | 4  | 0.11   | 0.65 |
| 2  | -4 | -3 | 302.84 | 3.77 |
| -3 | 1  | -4 | -1.60  | 0.76 |



|    |    |    |        |      |
|----|----|----|--------|------|
| -2 | 4  | 3  | 286.31 | 4.16 |
| -2 | -4 | 3  | 283.28 | 4.13 |
| 2  | 4  | -3 | 283.74 | 3.63 |
| 1  | -5 | -2 | -1.81  | 0.91 |
| 2  | -3 | -4 | -20.12 | 1.87 |
| -2 | 3  | 4  | 0.46   | 1.24 |
| -1 | 5  | 2  | -1.43  | 1.01 |
| 1  | 5  | -2 | 0.32   | 0.74 |
| -1 | -5 | 2  | -0.58  | 0.90 |
| 0  | 2  | 5  | 3.10   | 0.40 |
| -2 | -3 | 4  | 0.95   | 0.70 |
| 0  | -2 | -5 | 2.83   | 0.41 |
| 2  | 3  | -4 | 1.64   | 0.54 |
| 0  | -2 | 5  | 2.87   | 0.40 |
| 0  | 2  | -5 | 2.76   | 0.40 |
| 4  | 3  | 1  | 8.44   | 0.62 |
| -3 | -3 | -3 | 40.10  | 1.50 |
| -4 | -3 | -1 | 10.30  | 1.00 |
| 3  | 3  | 3  | 28.44  | 1.20 |
| 4  | 0  | 3  | -0.25  | 0.72 |
| -4 | 0  | -3 | -0.21  | 0.83 |
| 4  | -3 | 1  | 8.53   | 0.63 |
| -4 | 3  | -1 | 9.11   | 0.71 |
| 3  | -3 | 3  | 32.18  | 1.24 |
| -3 | 3  | -3 | 36.80  | 1.42 |
| -1 | -5 | -2 | 201.78 | 3.32 |
| 1  | 5  | 2  | 190.21 | 2.83 |
| -1 | 5  | -2 | 203.09 | 3.39 |
| 1  | -5 | 2  | 200.79 | 2.98 |
| -2 | 0  | 5  | 0.47   | 0.94 |
| 2  | 0  | -5 | 0.50   | 0.84 |
| -2 | -4 | -3 | 44.96  | 1.64 |
| -2 | 5  | 1  | 185.14 | 3.27 |
| 2  | -5 | -1 | 193.61 | 2.96 |
| 2  | 5  | -1 | 184.98 | 2.88 |
| -2 | -5 | 1  | 190.58 | 3.35 |
| 2  | 4  | 3  | 36.10  | 1.28 |
| -2 | 4  | -3 | 48.84  | 1.71 |
| 2  | -4 | 3  | 43.07  | 1.42 |
| -3 | 4  | 2  | -0.28  | 0.79 |
| 3  | -4 | -2 | 0.27   | 0.71 |
| 3  | 4  | -2 | 0.56   | 0.46 |
| -3 | -4 | 2  | 0.02   | 0.81 |
| 2  | 5  | 1  | 82.34  | 1.91 |
| -2 | -5 | -1 | 87.58  | 2.22 |
| -2 | 5  | -1 | 85.18  | 2.28 |
| 2  | -5 | 1  | 82.80  | 1.98 |
| -1 | 2  | 5  | 51.02  | 1.75 |
| 1  | -2 | -5 | 47.62  | 1.49 |
| 1  | 2  | -5 | 50.80  | 1.60 |
| -1 | -2 | 5  | 49.24  | 1.81 |
| 3  | -2 | -4 | 97.41  | 2.00 |
| -3 | 2  | 4  | 96.76  | 2.26 |
| 3  | 2  | -4 | 93.12  | 2.03 |
| -3 | -2 | 4  | 97.22  | 2.33 |
| 5  | 0  | 0  | 0.04   | 0.71 |
| -5 | 0  | 0  | 0.38   | 0.77 |
| 2  | 3  | 4  | 22.87  | 1.14 |

|    |    |    |        |      |
|----|----|----|--------|------|
| 4  | 1  | 3  | 9.98   | 0.90 |
| -2 | -3 | -4 | 31.46  | 1.42 |
| -4 | -1 | -3 | 15.61  | 1.15 |
| 4  | -1 | 3  | 9.84   | 0.67 |
| -4 | 1  | -3 | 15.34  | 1.16 |
| 2  | -3 | 4  | 28.13  | 1.15 |
| -2 | 3  | -4 | 31.17  | 1.40 |
| 2  | -1 | -5 | 41.18  | 1.42 |
| -2 | 1  | 5  | 43.69  | 1.67 |
| 2  | 1  | -5 | 42.62  | 1.73 |
| -2 | -1 | 5  | 44.18  | 1.91 |
| 3  | 4  | 2  | 152.28 | 2.47 |
| -3 | -4 | -2 | 176.46 | 3.00 |
| 3  | -4 | 2  | 162.68 | 2.54 |
| 1  | 2  | 5  | 25.17  | 1.12 |
| -1 | -2 | -5 | 33.13  | 1.41 |
| -3 | 4  | -2 | 165.10 | 2.93 |
| -1 | 2  | -5 | 34.54  | 1.45 |
| 1  | -2 | 5  | 29.75  | 1.25 |
| -5 | 0  | 1  | 360.91 | 4.17 |
| 5  | 0  | -1 | 364.00 | 3.68 |
| 2  | 0  | 5  | -0.11  | 0.59 |
| -2 | 0  | -5 | 0.01   | 0.70 |
| -5 | 1  | 0  | 32.06  | 1.42 |
| 5  | -1 | 0  | 29.64  | 1.22 |
| -5 | -1 | 0  | 30.23  | 1.33 |
| 5  | 1  | 0  | 28.74  | 1.22 |
| 4  | -2 | -3 | 7.58   | 0.62 |
| -4 | 2  | 3  | 7.59   | 0.68 |
| 4  | -3 | -2 | 74.75  | 1.82 |
| 4  | 2  | -3 | 7.18   | 0.58 |
| 4  | 3  | -2 | 70.98  | 1.79 |
| -4 | 3  | 2  | 71.26  | 2.03 |
| -4 | -3 | 2  | 73.73  | 2.03 |
| -4 | -2 | 3  | 6.41   | 0.69 |
| 5  | 0  | 1  | 540.86 | 4.50 |
| -5 | 0  | -1 | 532.99 | 5.05 |
| 0  | -4 | -4 | 25.03  | 1.28 |
| 0  | 4  | 4  | 25.84  | 1.20 |
| 0  | -4 | 4  | 26.02  | 1.25 |
| 0  | 4  | -4 | 24.81  | 1.30 |
| -3 | -2 | -4 | 180.16 | 3.02 |
| 3  | 2  | 4  | 129.27 | 2.27 |
| 3  | -2 | 4  | 149.15 | 2.47 |
| -3 | 2  | -4 | 175.65 | 2.99 |
| -5 | 1  | 1  | 31.52  | 1.35 |
| 5  | 1  | -1 | 33.61  | 1.31 |
| -5 | -1 | 1  | 30.07  | 1.36 |
| 2  | 1  | 5  | 14.60  | 1.01 |
| 5  | -1 | -1 | 34.03  | 1.29 |
| -2 | -1 | -5 | 18.30  | 1.23 |
| -2 | 1  | -5 | 19.34  | 1.24 |
| 2  | -1 | 5  | 13.64  | 0.99 |
| -1 | 4  | 4  | 221.86 | 3.79 |
| 5  | 1  | 1  | 84.03  | 1.91 |
| -5 | -1 | -1 | 85.75  | 2.17 |
| 1  | -4 | -4 | 235.44 | 3.41 |
| 1  | 4  | -4 | 225.04 | 3.41 |

|    |    |    |        |      |
|----|----|----|--------|------|
| -5 | 1  | -1 | 81.79  | 2.16 |
| 5  | -1 | 1  | 83.92  | 1.91 |
| -1 | -4 | 4  | 216.07 | 3.82 |
| -4 | -3 | -2 | 9.03   | 0.64 |
| 4  | 3  | 2  | 7.16   | 0.58 |
| 2  | -5 | -2 | 2.45   | 0.51 |
| -2 | 5  | 2  | 2.55   | 0.74 |
| 4  | -3 | 2  | 8.26   | 0.59 |
| -4 | 3  | -2 | 8.70   | 0.70 |
| 2  | 5  | -2 | 2.88   | 0.51 |
| -2 | -5 | 2  | 2.70   | 0.63 |
| -1 | -4 | -4 | 2.52   | 0.55 |
| 1  | 4  | 4  | 0.49   | 0.75 |
| 4  | 2  | 3  | 26.92  | 1.22 |
| 0  | -5 | -3 | 289.47 | 3.68 |
| 1  | -4 | 4  | 2.10   | 0.41 |
| 0  | 5  | 3  | 278.42 | 3.61 |
| -4 | -2 | -3 | 34.80  | 1.47 |
| -1 | 4  | -4 | 1.57   | 0.58 |
| 0  | -5 | 3  | 290.22 | 3.79 |
| -4 | 2  | -3 | 37.37  | 1.55 |
| 0  | 5  | -3 | 290.84 | 3.77 |
| -2 | -5 | -2 | 89.58  | 2.30 |
| 2  | 5  | 2  | 81.82  | 1.94 |
| 4  | -2 | 3  | 27.72  | 1.21 |
| 2  | -5 | 2  | 89.66  | 2.05 |
| -2 | 5  | -2 | 92.65  | 2.37 |
| -2 | 2  | 5  | 157.86 | 3.43 |
| 2  | -2 | -5 | 168.18 | 3.12 |
| -2 | -2 | 5  | 149.94 | 3.37 |
| 2  | 2  | -5 | 155.23 | 3.03 |
| 5  | 0  | -2 | 0.07   | 0.70 |
| -5 | 0  | 2  | -1.05  | 0.76 |
| 0  | -3 | -5 | 269.85 | 3.30 |
| 0  | 3  | 5  | 273.34 | 3.33 |
| 0  | 3  | -5 | 271.45 | 3.46 |
| 0  | -3 | 5  | 281.13 | 3.49 |
| -5 | 2  | 0  | 252.46 | 3.62 |
| -5 | -2 | 0  | 259.03 | 3.66 |
| 5  | -2 | 0  | 270.26 | 3.33 |
| 5  | 2  | 0  | 265.79 | 3.29 |
| 1  | -5 | -3 | 7.75   | 0.65 |
| -1 | 5  | 3  | 7.65   | 0.90 |
| -1 | -5 | 3  | 9.27   | 0.84 |
| 1  | 5  | -3 | 8.18   | 0.75 |
| 4  | 0  | -4 | 0.03   | 0.71 |
| -4 | 0  | 4  | 0.50   | 0.76 |
| -1 | -5 | -3 | 145.33 | 2.92 |
| 1  | 5  | 3  | 135.81 | 2.49 |
| 5  | -1 | -2 | 35.15  | 1.39 |
| -5 | 1  | 2  | 31.07  | 1.52 |
| -5 | -1 | 2  | 31.69  | 1.48 |
| 5  | 1  | -2 | 35.66  | 1.36 |
| 0  | 6  | 0  | 88.00  | 2.27 |
| 1  | -5 | 3  | 146.67 | 2.65 |
| -1 | 5  | -3 | 142.65 | 2.98 |
| 0  | -6 | 0  | 95.80  | 2.37 |
| -4 | -4 | 0  | 28.74  | 1.50 |

|    |    |    |        |      |
|----|----|----|--------|------|
| 4  | 4  | 0  | 29.92  | 1.35 |
| 2  | 2  | 5  | 112.12 | 2.19 |
| -4 | 4  | 0  | 28.78  | 1.48 |
| 4  | -4 | 0  | 32.30  | 1.34 |
| -5 | -2 | 1  | 328.22 | 4.12 |
| 5  | 2  | -1 | 333.00 | 3.67 |
| -2 | -2 | -5 | 154.26 | 2.86 |
| -5 | 2  | 1  | 321.27 | 4.09 |
| 5  | -2 | -1 | 332.56 | 3.67 |
| -3 | 4  | 3  | 3.80   | 0.67 |
| -2 | 2  | -5 | 155.30 | 2.88 |
| 3  | -4 | -3 | 5.09   | 0.51 |
| 2  | -2 | 5  | 123.90 | 2.30 |
| 3  | 4  | -3 | 4.42   | 0.50 |
| -3 | -4 | 3  | 4.40   | 0.70 |
| -1 | 3  | 5  | 253.50 | 3.84 |
| 1  | -3 | -5 | 253.34 | 3.36 |
| 3  | 5  | 0  | 284.88 | 3.53 |
| -3 | -5 | 0  | 281.41 | 3.95 |
| 3  | -5 | 0  | 291.84 | 3.58 |
| -3 | 5  | 0  | 281.99 | 3.99 |
| -3 | 3  | 4  | 123.57 | 2.72 |
| 3  | -3 | -4 | 130.05 | 2.44 |
| -1 | -3 | 5  | 251.60 | 4.05 |
| 1  | 3  | -5 | 250.15 | 3.54 |
| -3 | -3 | 4  | 120.72 | 2.78 |
| 3  | 3  | -4 | 123.90 | 2.45 |
| -5 | 0  | -2 | -0.09  | 0.78 |
| 5  | 0  | 2  | -0.20  | 0.71 |
| -3 | 0  | 5  | 74.14  | 2.05 |
| 3  | 0  | -5 | 69.75  | 1.79 |
| -5 | -2 | -1 | 232.17 | 3.49 |
| 5  | -2 | 1  | 234.53 | 3.11 |
| -4 | 1  | 4  | 142.64 | 2.85 |
| 4  | -1 | -4 | 148.47 | 2.53 |
| 5  | 2  | 1  | 235.78 | 3.13 |
| -5 | 2  | -1 | 227.83 | 3.47 |
| 4  | -4 | -1 | 106.70 | 2.24 |
| 4  | 1  | -4 | 149.13 | 2.49 |
| -4 | 4  | 1  | 105.72 | 2.49 |
| 4  | 4  | -1 | 109.76 | 2.23 |
| -4 | -1 | 4  | 139.26 | 2.74 |
| -4 | -4 | 1  | 109.54 | 2.54 |
| 1  | 3  | 5  | 2.79   | 0.46 |
| -1 | -3 | -5 | 4.08   | 0.62 |
| 0  | -6 | -1 | 251.77 | 3.68 |
| 0  | 6  | 1  | 252.47 | 3.69 |
| -1 | 3  | -5 | 3.85   | 0.64 |
| 0  | -6 | 1  | 259.37 | 3.76 |
| 0  | 6  | -1 | 247.91 | 3.65 |
| 1  | -3 | 5  | 2.97   | 0.45 |
| -3 | -5 | 1  | 56.06  | 1.91 |
| 3  | 5  | -1 | 54.88  | 1.70 |
| -3 | 5  | 1  | 54.83  | 1.95 |
| 3  | -5 | -1 | 55.79  | 1.73 |
| 1  | -6 | 0  | 188.85 | 3.24 |
| -1 | 6  | 0  | 177.27 | 3.55 |
| -1 | -6 | 0  | 187.27 | 3.64 |

|    |    |    |        |      |
|----|----|----|--------|------|
| 1  | 6  | 0  | 188.94 | 3.21 |
| -2 | 4  | 4  | 2.04   | 0.76 |
| 2  | -4 | -4 | 0.07   | 0.58 |
| 2  | 4  | -4 | -0.33  | 0.90 |
| -5 | -1 | -2 | 80.75  | 2.19 |
| 5  | -1 | 2  | 78.39  | 1.91 |
| -2 | -4 | 4  | -1.54  | 1.08 |
| 5  | 1  | 2  | 75.92  | 1.89 |
| -5 | 1  | -2 | 75.61  | 2.09 |
| -3 | -4 | -3 | 8.79   | 0.71 |
| 4  | 4  | 1  | 279.42 | 3.44 |
| 3  | 4  | 3  | 7.67   | 0.59 |
| -4 | -4 | -1 | 281.78 | 3.90 |
| -4 | 4  | -1 | 278.70 | 3.92 |
| -3 | 4  | -3 | 8.34   | 0.73 |
| 3  | -4 | 3  | 6.70   | 0.51 |
| 4  | -4 | 1  | 285.64 | 3.49 |
| 3  | 5  | 1  | 59.63  | 1.79 |
| -3 | -5 | -1 | 66.59  | 2.08 |
| 3  | -5 | 1  | 60.08  | 1.78 |
| -3 | 5  | -1 | 77.91  | 2.19 |
| 3  | -1 | -5 | 115.39 | 2.25 |
| -3 | 1  | 5  | 112.85 | 2.51 |
| 3  | 1  | -5 | 108.21 | 2.27 |
| -3 | -1 | 5  | 111.04 | 2.61 |
| 4  | -3 | -3 | 292.10 | 3.53 |
| -4 | 3  | 3  | 293.14 | 3.99 |
| 4  | 3  | -3 | 290.93 | 3.53 |
| -4 | -3 | 3  | 280.39 | 3.95 |
| 0  | 0  | 6  | 13.15  | 0.94 |
| 0  | 0  | -6 | 14.32  | 1.00 |
| -3 | -3 | -4 | 4.81   | 0.66 |
| 3  | 3  | 4  | 2.55   | 0.45 |
| -3 | 3  | -4 | 4.11   | 0.65 |
| 3  | -3 | 4  | 3.94   | 0.47 |
| -4 | 0  | -4 | 118.07 | 2.60 |
| 4  | 0  | 4  | 62.23  | 1.73 |
| 1  | 6  | -1 | 143.51 | 2.85 |
| 1  | -6 | -1 | 151.93 | 2.93 |
| -1 | -6 | 1  | 148.73 | 3.30 |
| -1 | 6  | 1  | 142.12 | 3.25 |
| -1 | -6 | -1 | 60.72  | 2.19 |
| 1  | 6  | 1  | 56.65  | 1.92 |
| -1 | 6  | -1 | 55.93  | 2.16 |
| 1  | -6 | 1  | 61.99  | 1.98 |
| 2  | 4  | 4  | 4.91   | 0.46 |
| -2 | -4 | -4 | 6.19   | 0.70 |
| 2  | -4 | 4  | 5.99   | 0.57 |
| -2 | 4  | -4 | 5.47   | 0.68 |
| -3 | 0  | -5 | 102.30 | 2.47 |
| 3  | 0  | 5  | 70.57  | 1.83 |
| 1  | 0  | -6 | 0.89   | 0.67 |
| -1 | 0  | 6  | 0.78   | 0.67 |
| -5 | 2  | 2  | 141.84 | 2.90 |
| 5  | 2  | -2 | 139.37 | 2.48 |
| 5  | -2 | -2 | 147.84 | 2.56 |
| -5 | -2 | 2  | 141.45 | 2.85 |
| 0  | 1  | 6  | 95.70  | 2.05 |

|    |    |    |        |      |
|----|----|----|--------|------|
| 0  | -1 | -6 | 100.23 | 2.09 |
| 0  | -1 | 6  | 99.46  | 2.11 |
| 0  | 1  | -6 | 101.64 | 2.10 |
| 2  | -5 | -3 | 46.28  | 1.85 |
| -2 | 5  | 3  | 46.87  | 2.07 |
| 2  | 5  | -3 | 46.14  | 1.80 |
| -2 | -5 | 3  | 44.75  | 1.96 |
| -4 | -1 | -4 | 494.85 | 5.13 |
| 4  | 1  | 4  | 255.19 | 3.33 |
| -4 | 1  | -4 | 498.76 | 5.19 |
| 4  | -1 | 4  | 287.41 | 3.54 |
| 4  | 3  | 3  | 16.28  | 1.05 |
| -4 | -3 | -3 | 21.71  | 1.36 |
| -4 | 3  | -3 | 22.21  | 1.36 |
| 4  | -3 | 3  | 17.77  | 1.16 |
| 2  | -3 | -5 | 118.70 | 2.83 |
| 1  | 0  | 6  | 0.07   | 0.44 |
| -1 | 0  | -6 | -0.32  | 0.72 |
| -2 | 3  | 5  | 113.76 | 3.14 |
| 2  | 3  | -5 | 108.78 | 2.66 |
| -2 | -3 | 5  | 112.14 | 3.07 |
| 4  | -4 | -2 | -0.15  | 0.76 |
| -4 | -4 | 2  | 0.05   | 0.86 |
| -4 | 4  | 2  | -0.87  | 0.88 |
| 4  | 4  | -2 | 0.95   | 0.42 |
| -3 | 1  | -5 | 146.57 | 2.92 |
| 3  | 1  | 5  | 98.53  | 2.17 |
| 3  | -1 | 5  | 97.36  | 2.15 |
| -3 | -1 | -5 | 148.72 | 2.96 |
| -1 | 1  | 6  | 76.61  | 2.14 |
| -1 | -1 | 6  | 74.75  | 2.18 |
| 1  | 1  | -6 | 80.45  | 1.99 |
| 1  | -1 | -6 | 69.52  | 1.83 |
| 4  | -2 | -4 | -0.60  | 0.81 |
| -4 | -2 | 4  | -0.80  | 0.86 |
| -4 | 2  | 4  | 0.26   | 0.77 |
| -5 | 0  | 3  | 104.67 | 2.50 |
| 5  | 0  | -3 | 107.70 | 2.22 |
| 4  | 2  | -4 | -0.69  | 0.79 |
| 2  | 5  | 3  | 37.69  | 1.44 |
| -2 | -5 | -3 | 45.59  | 1.82 |
| -2 | 5  | -3 | 43.63  | 1.81 |
| 2  | -5 | 3  | 45.55  | 1.62 |
| -3 | -5 | 2  | 112.30 | 2.68 |
| -3 | 5  | 2  | 103.97 | 2.68 |
| 3  | -5 | -2 | 111.54 | 2.40 |
| 3  | 5  | -2 | 108.63 | 2.34 |
| 0  | -6 | -2 | 29.65  | 1.53 |
| 0  | 6  | 2  | 27.60  | 1.51 |
| 0  | -6 | 2  | 28.27  | 1.58 |
| 0  | 6  | -2 | 27.58  | 1.50 |
| 5  | 2  | 2  | 11.16  | 1.02 |
| -5 | -2 | -2 | 13.46  | 1.14 |
| -5 | 2  | -2 | 12.76  | 1.11 |
| 5  | -2 | 2  | 15.22  | 1.04 |
| -5 | -3 | 0  | 153.95 | 2.97 |
| 5  | 3  | 0  | 152.98 | 2.68 |
| 5  | -3 | 0  | 159.03 | 2.69 |

|    |    |    |        |      |
|----|----|----|--------|------|
| -5 | 3  | 0  | 149.81 | 2.96 |
| 3  | 2  | -5 | 68.48  | 1.99 |
| -3 | 2  | 5  | 72.55  | 2.25 |
| 3  | -2 | -5 | 69.06  | 1.92 |
| -3 | -2 | 5  | 66.08  | 2.24 |
| 1  | -1 | 6  | 11.83  | 0.90 |
| -1 | 1  | -6 | 11.89  | 1.14 |
| 1  | 1  | 6  | 8.87   | 0.60 |
| -1 | -1 | -6 | 9.59   | 0.78 |
| 5  | 1  | -3 | 186.65 | 2.87 |
| 5  | -1 | -3 | 191.01 | 2.90 |
| -5 | -1 | 3  | 177.86 | 3.17 |
| -5 | 1  | 3  | 188.83 | 3.29 |
| 4  | 4  | 2  | 1.91   | 0.44 |
| -4 | -4 | -2 | 2.42   | 0.63 |
| 3  | 5  | 2  | 105.46 | 2.30 |
| -3 | -5 | -2 | 124.67 | 2.81 |
| 4  | -4 | 2  | 2.11   | 0.47 |
| -4 | 4  | -2 | 2.45   | 0.59 |
| 2  | 6  | 0  | 45.34  | 1.68 |
| 2  | -6 | 0  | 47.99  | 1.78 |
| -3 | 5  | -2 | 119.34 | 2.75 |
| -2 | 6  | 0  | 46.19  | 1.96 |
| -2 | -6 | 0  | 48.63  | 1.97 |
| 3  | -5 | 2  | 117.94 | 2.40 |
| -5 | -3 | 1  | 13.73  | 1.27 |
| 2  | 3  | 5  | 30.71  | 1.40 |
| 5  | 3  | -1 | 17.14  | 1.17 |
| -2 | -3 | -5 | 46.86  | 1.79 |
| -5 | 3  | 1  | 16.10  | 1.31 |
| 5  | -3 | -1 | 16.32  | 1.19 |
| -2 | 3  | -5 | 45.51  | 1.82 |
| 2  | -3 | 5  | 37.37  | 1.49 |
| 1  | -6 | -2 | 120.42 | 2.74 |
| -1 | 6  | 2  | 117.08 | 3.08 |
| -1 | -6 | 2  | 122.00 | 3.07 |
| 1  | 6  | -2 | 118.99 | 2.68 |
| -1 | -6 | -2 | 0.18   | 1.00 |
| 1  | 6  | 2  | 0.30   | 0.51 |
| 1  | -6 | 2  | 1.32   | 0.50 |
| -1 | 6  | -2 | -0.40  | 1.04 |
| 5  | 3  | 1  | 34.13  | 1.50 |
| -5 | -3 | -1 | 42.51  | 1.74 |
| 5  | -3 | 1  | 41.29  | 1.51 |
| 0  | 5  | 4  | 18.14  | 1.20 |
| -5 | 3  | -1 | 40.52  | 1.71 |
| 0  | -5 | -4 | 15.38  | 1.25 |
| 0  | 5  | -4 | 16.09  | 1.17 |
| -2 | -6 | 1  | 12.87  | 1.01 |
| -2 | 6  | 1  | 12.73  | 0.97 |
| 0  | -5 | 4  | 13.29  | 1.23 |
| 2  | -6 | -1 | 15.93  | 1.24 |
| 2  | 6  | -1 | 13.51  | 1.25 |
| -5 | 0  | -3 | 101.75 | 2.49 |
| 0  | 2  | 6  | 2.51   | 0.43 |
| 5  | 0  | 3  | 65.08  | 1.84 |
| 0  | -2 | -6 | 2.62   | 0.43 |
| 0  | 2  | -6 | 2.45   | 0.45 |

|    |    |    |        |      |
|----|----|----|--------|------|
| 0  | -2 | 6  | 0.74   | 0.82 |
| 4  | 2  | 4  | 18.02  | 1.17 |
| -4 | -2 | -4 | 42.31  | 1.74 |
| 2  | 6  | 1  | -1.08  | 0.88 |
| -2 | -6 | -1 | -1.73  | 0.99 |
| -4 | 2  | -4 | 40.19  | 1.65 |
| -2 | 0  | 6  | 204.43 | 3.56 |
| 4  | -2 | 4  | 24.03  | 1.28 |
| 2  | 0  | -6 | 211.27 | 3.22 |
| 2  | -6 | 1  | -0.38  | 0.77 |
| -2 | 6  | -1 | 1.20   | 0.95 |
| 0  | -4 | -5 | 4.30   | 0.52 |
| 0  | 4  | 5  | 5.46   | 0.51 |
| 0  | -4 | 5  | 5.01   | 0.53 |
| 0  | 4  | -5 | 5.09   | 0.54 |
| 3  | 2  | 5  | 75.59  | 1.94 |
| -3 | -2 | -5 | 109.92 | 2.62 |
| -3 | 2  | -5 | 114.34 | 2.65 |
| 1  | -2 | -6 | 0.22   | 0.83 |
| -1 | 2  | 6  | -0.94  | 0.87 |
| -1 | 5  | 4  | 86.40  | 2.70 |
| 3  | -2 | 5  | 84.05  | 2.07 |
| 1  | -5 | -4 | 92.63  | 2.45 |
| -1 | -2 | 6  | 0.71   | 0.97 |
| 1  | 2  | -6 | -0.78  | 0.84 |
| -1 | -5 | 4  | 91.43  | 2.79 |
| 1  | 5  | -4 | 90.78  | 2.42 |
| 5  | -1 | 3  | 196.27 | 3.04 |
| 5  | 1  | 3  | 159.95 | 2.75 |
| -5 | 1  | -3 | 266.46 | 3.90 |
| -5 | -1 | -3 | 263.87 | 3.89 |
| -2 | 1  | 6  | 23.22  | 1.37 |
| 2  | -1 | -6 | 21.28  | 1.22 |
| 2  | 1  | -6 | 20.88  | 1.44 |
| -2 | -1 | 6  | 26.59  | 1.66 |
| -1 | 4  | 5  | 2.52   | 0.81 |
| 1  | -4 | -5 | 3.02   | 0.57 |
| 3  | -4 | -4 | 107.34 | 2.41 |
| 1  | 4  | -5 | 2.44   | 0.59 |
| -1 | -4 | 5  | 3.38   | 0.79 |
| -3 | 4  | 4  | 100.03 | 2.70 |
| -3 | -4 | 4  | 103.60 | 2.88 |
| 3  | 4  | -4 | 99.90  | 2.41 |
| -1 | -5 | -4 | 64.16  | 2.11 |
| 1  | 5  | 4  | 52.38  | 1.71 |
| -1 | 5  | -4 | 59.25  | 2.10 |
| 1  | -5 | 4  | 61.02  | 1.90 |
| 1  | 2  | 6  | 73.39  | 1.92 |
| -1 | -2 | -6 | 91.57  | 2.40 |
| 1  | -2 | 6  | 86.69  | 2.07 |
| -1 | 2  | -6 | 99.89  | 2.51 |
| -5 | 2  | 3  | 41.89  | 1.80 |
| 5  | -2 | -3 | 40.62  | 1.60 |
| 5  | 2  | -3 | 43.83  | 1.58 |
| -5 | -2 | 3  | 41.08  | 1.77 |
| -2 | 0  | -6 | 185.80 | 3.33 |
| 2  | 0  | 6  | 138.21 | 2.53 |
| -5 | -3 | 2  | 30.64  | 1.60 |



|    |    |    |        |      |
|----|----|----|--------|------|
| -5 | 3  | 2  | 29.42  | 1.56 |
| 5  | 3  | -2 | 30.75  | 1.47 |
| 5  | -3 | -2 | 35.64  | 1.50 |
| 1  | 4  | 5  | 2.02   | 0.46 |
| -1 | -4 | -5 | 2.24   | 0.68 |
| -1 | 4  | -5 | 1.30   | 0.95 |
| 1  | -4 | 5  | 3.63   | 0.46 |
| 4  | 4  | -3 | 12.52  | 1.09 |
| -4 | -4 | 3  | 15.05  | 1.25 |
| -4 | 4  | 3  | 13.93  | 1.17 |
| 4  | -4 | -3 | 12.04  | 0.80 |
| 4  | -3 | -4 | 31.39  | 1.49 |
| -4 | 3  | 4  | 29.60  | 1.61 |
| -4 | -3 | 4  | 25.14  | 1.57 |
| 4  | 3  | -4 | 31.65  | 1.46 |
| -2 | 1  | -6 | 2.18   | 0.66 |
| -2 | -1 | -6 | 0.71   | 0.96 |
| 2  | 1  | 6  | 1.32   | 0.43 |
| 2  | -1 | 6  | -0.26  | 0.86 |
| -2 | 6  | 2  | 87.35  | 2.66 |
| -2 | -6 | 2  | 92.98  | 2.72 |
| 2  | 6  | -2 | 91.06  | 2.38 |
| 2  | -6 | -2 | 92.81  | 2.42 |
| -3 | -4 | -4 | 299.48 | 4.22 |
| 3  | 4  | 4  | 235.90 | 3.36 |
| -4 | 0  | 5  | 0.66   | 0.86 |
| 4  | 0  | -5 | -0.17  | 0.80 |
| -4 | 5  | 0  | 1.10   | 0.99 |
| 4  | -5 | 0  | -0.59  | 0.86 |
| -4 | -5 | 0  | 1.47   | 0.67 |
| -3 | 4  | -4 | 296.38 | 4.25 |
| 3  | -4 | 4  | 277.25 | 3.69 |
| 4  | 5  | 0  | -0.32  | 0.82 |
| 3  | -5 | -3 | 8.52   | 0.75 |
| -3 | 5  | 3  | 6.66   | 0.85 |
| -3 | -5 | 3  | 5.97   | 0.81 |
| 3  | 5  | -3 | 8.31   | 0.72 |
| -6 | 0  | 0  | 51.09  | 1.91 |
| 6  | 0  | 0  | 53.64  | 1.69 |
| -5 | -3 | -2 | 146.60 | 3.01 |
| 5  | 3  | 2  | 125.92 | 2.47 |
| 5  | -3 | 2  | 153.99 | 2.75 |
| -5 | 3  | -2 | 147.84 | 3.02 |
| 0  | -6 | -3 | 2.57   | 0.59 |
| 0  | 6  | 3  | 3.30   | 0.54 |
| -2 | -6 | -2 | 24.84  | 1.52 |
| 2  | 6  | 2  | 21.14  | 1.34 |
| 0  | -6 | 3  | 2.02   | 0.56 |
| 0  | 6  | -3 | 2.04   | 0.56 |
| -2 | 6  | -2 | 25.17  | 1.55 |
| 2  | -6 | 2  | 23.29  | 1.43 |
| 3  | -3 | -5 | 28.89  | 1.53 |
| -3 | 3  | 5  | 30.86  | 1.73 |
| -3 | -3 | 5  | 25.81  | 1.76 |
| 3  | 3  | -5 | 31.28  | 1.54 |
| -4 | -5 | 1  | 111.06 | 2.71 |
| 6  | 0  | -1 | 0.44   | 0.68 |
| 4  | 5  | -1 | 106.21 | 2.36 |

|    |    |    |        |      |
|----|----|----|--------|------|
| -4 | 5  | 1  | 105.76 | 2.70 |
| -6 | 0  | 1  | -0.63  | 0.86 |
| 4  | -5 | -1 | 111.14 | 2.38 |
| 5  | 2  | 3  | 8.65   | 0.67 |
| -5 | -2 | -3 | 13.81  | 1.16 |
| 5  | -2 | 3  | 12.15  | 1.02 |
| -5 | 2  | -3 | 13.36  | 1.23 |
| 4  | -1 | -5 | 13.65  | 1.21 |
| 4  | 1  | -5 | 13.94  | 1.22 |
| -4 | 1  | 5  | 16.16  | 1.32 |
| -4 | -1 | 5  | 16.68  | 1.32 |
| -2 | 2  | 6  | 75.31  | 2.32 |
| 2  | -2 | -6 | 78.31  | 2.15 |
| -2 | -2 | 6  | 74.62  | 2.69 |
| 2  | 2  | -6 | 75.89  | 2.34 |
| 6  | -1 | 0  | 66.68  | 1.91 |
| -6 | -1 | 0  | 66.09  | 2.11 |
| -6 | 1  | 0  | 68.85  | 2.16 |
| 6  | 1  | 0  | 66.74  | 1.88 |
| 2  | -5 | -4 | 5.07   | 0.63 |
| -2 | 5  | 4  | 4.30   | 0.85 |
| -2 | -5 | 4  | 2.71   | 0.83 |
| 2  | 5  | -4 | 5.24   | 0.57 |
| 3  | 5  | 3  | 0.05   | 0.87 |
| 4  | 5  | 1  | 59.92  | 1.86 |
| -3 | -5 | -3 | 1.27   | 0.94 |
| -4 | -5 | -1 | 61.85  | 2.11 |
| -4 | 5  | -1 | 58.13  | 2.04 |
| 4  | 4  | 3  | 107.38 | 2.36 |
| 4  | -5 | 1  | 63.61  | 1.89 |
| -4 | -4 | -3 | 155.35 | 3.13 |
| -3 | 5  | -3 | 2.07   | 0.67 |
| -4 | 4  | -3 | 151.52 | 3.10 |
| 3  | -5 | 3  | 1.57   | 0.47 |
| 1  | -6 | -3 | 40.31  | 1.79 |
| 4  | -4 | 3  | 128.84 | 2.63 |
| -1 | 6  | 3  | 38.08  | 1.98 |
| 1  | 6  | -3 | 41.53  | 1.73 |
| -1 | -6 | 3  | 38.52  | 1.85 |
| 2  | -4 | -5 | 271.20 | 4.25 |
| -2 | 4  | 5  | 264.09 | 4.75 |
| 2  | 4  | -5 | 259.21 | 4.04 |
| -2 | -4 | 5  | 253.73 | 4.57 |
| -6 | 0  | -1 | -0.64  | 0.88 |
| 6  | 0  | 1  | -1.77  | 0.74 |
| 5  | 0  | -4 | -0.84  | 0.78 |
| -6 | 1  | 1  | 25.90  | 1.49 |
| 6  | 1  | -1 | 26.47  | 1.30 |
| 6  | -1 | -1 | 27.87  | 1.41 |
| -6 | -1 | 1  | 28.01  | 1.49 |
| -5 | 0  | 4  | 1.06   | 0.88 |
| 1  | 6  | 3  | 8.70   | 0.75 |
| -1 | -6 | -3 | 9.35   | 0.88 |
| 0  | -3 | -6 | 36.76  | 1.56 |
| 0  | 3  | 6  | 39.74  | 1.55 |
| 1  | -6 | 3  | 8.92   | 0.79 |
| -1 | 6  | -3 | 9.75   | 0.89 |
| 0  | 3  | -6 | 44.46  | 1.63 |

|    |    |    |        |      |
|----|----|----|--------|------|
| 0  | -3 | 6  | 41.87  | 1.59 |
| -4 | -3 | -4 | 11.12  | 1.09 |
| 4  | 3  | 4  | 6.48   | 0.50 |
| 4  | -3 | 4  | 8.66   | 0.66 |
| -4 | 3  | -4 | 13.90  | 1.17 |
| -3 | -6 | 0  | 0.17   | 0.98 |
| 3  | 6  | 0  | 1.23   | 0.83 |
| 3  | -6 | 0  | -0.25  | 0.91 |
| -3 | 6  | 0  | 0.69   | 1.03 |
| -5 | -4 | 0  | 220.61 | 3.70 |
| 5  | 4  | 0  | 213.19 | 3.27 |
| 2  | 5  | 4  | 0.64   | 0.43 |
| -2 | -5 | -4 | -0.43  | 0.90 |
| -5 | 4  | 0  | 208.47 | 3.61 |
| 5  | -4 | 0  | 236.64 | 3.39 |
| 2  | -5 | 4  | -0.10  | 0.76 |
| -2 | 5  | -4 | 1.29   | 0.87 |
| 6  | 1  | 1  | 43.06  | 1.55 |
| 6  | -1 | 1  | 45.67  | 1.65 |
| -6 | -1 | -1 | 45.73  | 1.80 |
| -6 | 1  | -1 | 40.52  | 1.80 |
| -3 | -3 | -5 | 6.11   | 0.77 |
| 3  | 3  | 5  | 4.82   | 0.53 |
| -1 | 3  | 6  | 294.86 | 4.35 |
| 1  | -3 | -6 | 303.98 | 3.90 |
| 3  | -3 | 5  | 4.63   | 0.50 |
| -3 | 3  | -5 | 5.39   | 0.73 |
| -2 | -2 | -6 | 121.76 | 2.84 |
| 1  | 3  | -6 | 311.41 | 4.13 |
| -5 | 1  | 4  | 29.52  | 1.61 |
| 5  | -1 | -4 | 33.30  | 1.49 |
| 2  | 2  | 6  | 91.23  | 2.19 |
| -1 | -3 | 6  | 298.17 | 4.66 |
| -5 | -1 | 4  | 33.52  | 1.63 |
| 5  | 1  | -4 | 32.23  | 1.41 |
| 2  | -2 | 6  | 104.97 | 2.34 |
| -2 | 2  | -6 | 128.38 | 2.94 |
| -4 | 0  | -5 | -0.39  | 0.88 |
| 4  | 0  | 5  | -0.55  | 0.74 |
| -3 | 0  | 6  | 0.14   | 0.95 |
| 3  | 0  | -6 | 0.91   | 0.92 |
| 2  | 4  | 5  | 167.74 | 2.90 |
| 5  | 4  | -1 | 25.90  | 1.40 |
| -5 | -4 | 1  | 27.34  | 1.65 |
| -2 | -4 | -5 | 219.95 | 3.74 |
| -5 | 4  | 1  | 28.88  | 1.58 |
| 5  | -4 | -1 | 29.08  | 1.39 |
| 3  | 6  | -1 | -0.21  | 0.80 |
| 3  | -6 | -1 | -0.78  | 0.85 |
| -3 | -6 | 1  | 0.08   | 0.99 |
| -3 | 6  | 1  | -1.31  | 1.03 |
| -2 | 4  | -5 | 218.95 | 3.75 |
| 2  | -4 | 5  | 200.43 | 3.21 |
| 3  | 6  | 1  | 34.75  | 1.58 |
| -3 | -6 | -1 | 37.26  | 1.84 |
| -3 | 6  | -1 | 35.09  | 1.87 |
| 3  | -6 | 1  | 36.35  | 1.65 |
| 6  | 0  | -2 | 137.57 | 2.61 |

|    |    |    |        |      |
|----|----|----|--------|------|
| -6 | 0  | 2  | 132.68 | 2.89 |
| 1  | 3  | 6  | 54.24  | 1.77 |
| -1 | -3 | -6 | 74.94  | 2.27 |
| -4 | 5  | 2  | 4.49   | 0.69 |
| 4  | -5 | -2 | 3.56   | 0.51 |
| 1  | -3 | 6  | 73.86  | 2.04 |
| -1 | 3  | -6 | 76.59  | 2.32 |
| 4  | 5  | -2 | 3.62   | 0.51 |
| -4 | -5 | 2  | 4.02   | 0.71 |
| 5  | 4  | 1  | 1.70   | 0.48 |
| -5 | -4 | -1 | 1.31   | 0.94 |
| -5 | 3  | 3  | 85.34  | 2.42 |
| -5 | -3 | 3  | 89.18  | 2.46 |
| -5 | 4  | -1 | 0.98   | 0.94 |
| 5  | -3 | -3 | 88.67  | 2.20 |
| 5  | -4 | 1  | 2.42   | 0.47 |
| 5  | 3  | -3 | 83.52  | 2.11 |
| 4  | 1  | 5  | 4.36   | 0.53 |
| -4 | -1 | -5 | 5.47   | 0.85 |
| -4 | 1  | -5 | 7.70   | 0.83 |
| 4  | -1 | 5  | 3.74   | 0.52 |
| 0  | 7  | 0  | 0.45   | 0.93 |
| 0  | -7 | 0  | -0.18  | 0.98 |
| -3 | 1  | 6  | 0.72   | 0.98 |
| 3  | -1 | -6 | 0.08   | 0.89 |
| -3 | -1 | 6  | 1.22   | 1.12 |
| 4  | -2 | -5 | 51.89  | 1.76 |
| 3  | 1  | -6 | -0.01  | 0.85 |
| -4 | 2  | 5  | 53.40  | 2.01 |
| 4  | 2  | -5 | 49.97  | 1.72 |
| -4 | -2 | 5  | 53.03  | 1.97 |
| -6 | -2 | 0  | 8.36   | 0.80 |
| -6 | 2  | 0  | 7.97   | 0.80 |
| 6  | 2  | 0  | 8.19   | 0.69 |
| 6  | -2 | 0  | 8.60   | 0.68 |
| 6  | -1 | -2 | 50.96  | 1.72 |
| -6 | 1  | 2  | 44.93  | 1.86 |
| 6  | 1  | -2 | 46.64  | 1.66 |
| -6 | -1 | 2  | 47.16  | 1.87 |
| 5  | 0  | 4  | 0.41   | 0.71 |
| -5 | 0  | -4 | 0.25   | 0.87 |
| 6  | 2  | -1 | 152.10 | 2.80 |
| -6 | -2 | 1  | 147.54 | 3.07 |
| -4 | -5 | -2 | 0.59   | 0.65 |
| 4  | 5  | 2  | -0.10  | 0.87 |
| -6 | 2  | 1  | 149.49 | 3.13 |
| 6  | -2 | -1 | 161.93 | 2.90 |
| -4 | 5  | -2 | 1.00   | 0.88 |
| 4  | -5 | 2  | -1.63  | 0.91 |
| 0  | 7  | 1  | 28.61  | 1.68 |
| 0  | -7 | 1  | 29.72  | 1.76 |
| 0  | 7  | -1 | 26.42  | 1.63 |
| 0  | -7 | -1 | 31.88  | 1.66 |
| 2  | -6 | -3 | 14.94  | 0.94 |
| -2 | 6  | 3  | 12.59  | 1.06 |
| 2  | 6  | -3 | 8.92   | 0.83 |
| -2 | -6 | 3  | 9.52   | 0.93 |
| -1 | -7 | 0  | 12.79  | 1.09 |

|    |    |    |        |      |
|----|----|----|--------|------|
| 1  | -7 | 0  | 10.45  | 0.93 |
| -1 | 7  | 0  | 12.45  | 0.98 |
| 1  | 7  | 0  | 13.15  | 0.91 |
| -6 | 0  | -2 | 28.09  | 1.57 |
| 6  | 0  | 2  | 26.74  | 1.31 |
| -3 | 0  | -6 | -0.53  | 1.02 |
| 3  | 0  | 6  | -0.66  | 0.76 |
| -6 | -2 | -1 | 10.36  | 0.77 |
| 6  | 2  | 1  | 10.00  | 0.71 |
| 5  | -1 | 4  | 7.07   | 0.65 |
| -6 | 2  | -1 | 11.32  | 1.10 |
| 5  | 1  | 4  | 5.19   | 0.53 |
| -5 | 1  | -4 | 10.43  | 0.88 |
| -5 | -1 | -4 | 11.96  | 1.16 |
| 6  | -2 | 1  | 9.74   | 0.76 |
| -5 | -2 | 4  | 1.18   | 0.64 |
| -5 | 2  | 4  | -0.11  | 1.02 |
| -2 | -6 | -3 | 45.63  | 1.98 |
| 5  | -2 | -4 | 0.64   | 0.48 |
| 2  | 6  | 3  | 35.71  | 1.60 |
| 5  | 2  | -4 | -1.04  | 0.86 |
| 5  | 4  | -2 | 187.89 | 3.18 |
| -5 | 4  | 2  | 177.39 | 3.51 |
| -5 | -4 | 2  | 185.92 | 3.51 |
| 5  | -4 | -2 | 196.92 | 3.20 |
| 5  | 3  | 3  | 7.08   | 0.67 |
| -2 | 6  | -3 | 45.14  | 1.97 |
| -5 | -3 | -3 | 12.65  | 1.23 |
| 2  | -6 | 3  | 49.25  | 1.81 |
| -5 | 3  | -3 | 14.02  | 0.86 |
| 5  | -3 | 3  | 11.48  | 1.01 |
| 3  | 6  | -2 | 3.30   | 0.56 |
| -3 | 6  | 2  | 3.34   | 0.77 |
| 3  | -6 | -2 | 4.35   | 0.55 |
| -3 | -6 | 2  | 3.14   | 0.77 |
| -2 | 3  | 6  | 18.69  | 1.64 |
| 2  | -3 | -6 | 16.64  | 1.41 |
| 1  | 7  | -1 | 29.82  | 1.69 |
| 2  | 3  | -6 | 16.08  | 1.57 |
| 1  | -7 | -1 | 32.41  | 1.76 |
| -1 | -7 | 1  | 30.90  | 1.93 |
| -2 | -3 | 6  | 16.14  | 1.23 |
| -1 | 7  | 1  | 28.26  | 1.96 |
| 6  | 1  | 2  | 62.83  | 1.87 |
| -6 | -1 | -2 | 63.01  | 2.11 |
| -1 | -7 | -1 | 144.65 | 3.48 |
| 0  | -5 | -5 | 80.03  | 2.17 |
| 1  | 7  | 1  | 141.10 | 3.04 |
| 0  | 5  | 5  | 81.18  | 2.21 |
| -6 | 1  | -2 | 62.60  | 2.10 |
| 6  | -1 | 2  | 61.98  | 1.91 |
| -1 | 7  | -1 | 143.10 | 3.56 |
| 1  | -7 | 1  | 146.85 | 3.09 |
| 0  | 5  | -5 | 81.79  | 2.27 |
| 0  | -5 | 5  | 81.24  | 2.27 |
| -3 | 1  | -6 | 32.21  | 1.73 |
| 3  | -1 | 6  | 19.22  | 1.34 |
| -3 | -1 | -6 | 35.88  | 1.75 |

|    |    |    |        |      |
|----|----|----|--------|------|
| 3  | 1  | 6  | 20.53  | 1.27 |
| 0  | 0  | 7  | -1.27  | 0.74 |
| 0  | 0  | -7 | 0.51   | 0.71 |
| -4 | 4  | 4  | 14.61  | 1.33 |
| 4  | -4 | -4 | 14.88  | 1.19 |
| 4  | 4  | -4 | 17.44  | 1.24 |
| -4 | -4 | 4  | 15.11  | 1.36 |
| 3  | 6  | 2  | 110.77 | 2.55 |
| -3 | -6 | -2 | 125.69 | 3.01 |
| 4  | 2  | 5  | 22.03  | 1.29 |
| -4 | -2 | -5 | 41.36  | 1.77 |
| -4 | 2  | -5 | 38.06  | 1.78 |
| -3 | 6  | -2 | 119.04 | 3.04 |
| 4  | -2 | 5  | 23.14  | 1.37 |
| 3  | -6 | 2  | 127.18 | 2.74 |
| 3  | -2 | -6 | 60.64  | 1.96 |
| -3 | 2  | 6  | 56.34  | 2.24 |
| 3  | 2  | -6 | 59.92  | 2.09 |
| -3 | -2 | 6  | 57.55  | 2.45 |
| 1  | -5 | -5 | 0.77   | 1.06 |
| -1 | 5  | 5  | 1.37   | 0.81 |
| -3 | 5  | 4  | 27.35  | 1.79 |
| -5 | -4 | -2 | 14.87  | 1.31 |
| 1  | 5  | -5 | 2.22   | 0.61 |
| 3  | -5 | -4 | 30.09  | 1.65 |
| -1 | -5 | 5  | 1.65   | 1.20 |
| 5  | 4  | 2  | 11.61  | 1.13 |
| -3 | -5 | 4  | 26.93  | 1.75 |
| 3  | 5  | -4 | 28.45  | 1.53 |
| 5  | -4 | 2  | 15.33  | 1.16 |
| -5 | 4  | -2 | 12.32  | 0.91 |
| -1 | 0  | 7  | 10.31  | 0.81 |
| 1  | 0  | -7 | 10.66  | 1.07 |
| -6 | -2 | 2  | 63.19  | 2.17 |
| 3  | -4 | -5 | 0.32   | 1.09 |
| -6 | 2  | 2  | 66.52  | 2.28 |
| 6  | 2  | -2 | 70.82  | 2.03 |
| 6  | -2 | -2 | 68.84  | 2.03 |
| -3 | 4  | 5  | -0.28  | 1.25 |
| 3  | 4  | -5 | 0.87   | 1.10 |
| -3 | -4 | 5  | -1.59  | 1.31 |
| 0  | -1 | -7 | 15.23  | 1.07 |
| 0  | 1  | 7  | 15.91  | 1.06 |
| 0  | -1 | 7  | 14.91  | 1.11 |
| 0  | 1  | -7 | 15.41  | 1.10 |
| 0  | -6 | -4 | -0.95  | 0.93 |
| 0  | 6  | 4  | -0.40  | 0.89 |
| -2 | -3 | -6 | 5.63   | 0.77 |
| 2  | 3  | 6  | 2.83   | 0.53 |
| 0  | -6 | 4  | -0.89  | 0.85 |
| 0  | 6  | -4 | 0.52   | 0.82 |
| 1  | 5  | 5  | 5.69   | 0.56 |
| -2 | 3  | -6 | 4.82   | 0.78 |
| 2  | -3 | 6  | 4.54   | 0.53 |
| -1 | -5 | -5 | 6.35   | 0.80 |
| 1  | -5 | 5  | 6.35   | 0.56 |
| -1 | 5  | -5 | 6.84   | 0.80 |
| 0  | -7 | -2 | 50.14  | 2.00 |

|    |    |    |        |      |
|----|----|----|--------|------|
| 0  | 7  | 2  | 48.55  | 1.93 |
| 0  | 7  | -2 | 50.07  | 1.96 |
| 0  | -7 | 2  | 48.73  | 1.98 |
| -1 | 1  | 7  | 87.19  | 2.46 |
| 1  | -1 | -7 | 83.20  | 2.17 |
| -6 | 0  | 3  | 0.53   | 0.64 |
| 6  | 0  | -3 | 0.65   | 0.59 |
| -1 | 0  | -7 | 53.72  | 2.02 |
| -1 | -1 | 7  | 89.92  | 2.56 |
| 1  | 0  | 7  | 44.08  | 1.64 |
| 1  | 1  | -7 | 91.56  | 2.27 |
| -5 | -2 | -4 | -0.42  | 0.89 |
| -4 | 5  | 3  | 45.67  | 2.01 |
| 4  | -5 | -3 | 46.97  | 1.79 |
| 5  | 2  | 4  | -0.44  | 0.77 |
| -5 | 2  | -4 | 0.62   | 0.78 |
| -4 | -5 | 3  | 46.11  | 2.01 |
| 5  | -2 | 4  | 0.23   | 0.74 |
| 4  | 5  | -3 | 46.50  | 1.83 |
| 1  | -6 | -4 | 10.54  | 0.88 |
| -1 | 6  | 4  | 9.20   | 1.02 |
| 1  | 6  | -4 | 9.36   | 0.81 |
| -1 | -6 | 4  | 11.23  | 0.94 |
| 0  | 4  | 6  | 3.84   | 0.51 |
| 0  | -4 | -6 | 4.00   | 0.53 |
| -2 | -7 | 0  | 127.87 | 3.30 |
| 2  | 7  | 0  | 124.30 | 2.91 |
| -3 | -5 | -4 | 3.88   | 0.79 |
| 2  | -7 | 0  | 124.46 | 2.93 |
| 3  | 5  | 4  | 3.74   | 0.56 |
| -2 | 7  | 0  | 118.05 | 3.22 |
| 0  | -4 | 6  | 3.51   | 0.53 |
| 4  | -3 | -5 | 88.99  | 2.30 |
| 0  | 4  | -6 | 4.11   | 0.54 |
| -4 | 3  | 5  | 85.47  | 2.54 |
| 3  | -5 | 4  | 4.90   | 0.55 |
| 4  | 4  | 4  | 0.59   | 0.75 |
| -4 | -4 | -4 | 0.69   | 0.86 |
| -3 | 5  | -4 | 3.66   | 0.77 |
| -4 | -3 | 5  | 83.98  | 2.61 |
| 4  | 3  | -5 | 87.28  | 2.29 |
| -4 | 4  | -4 | -0.25  | 0.95 |
| 4  | -4 | 4  | -0.73  | 0.85 |
| 6  | 3  | 0  | 26.68  | 1.48 |
| -6 | -3 | 0  | 29.22  | 1.70 |
| 1  | -7 | -2 | 8.46   | 0.73 |
| -6 | 3  | 0  | 27.59  | 1.62 |
| -1 | 7  | 2  | 7.11   | 0.99 |
| 6  | -3 | 0  | 28.02  | 1.45 |
| -6 | -2 | -2 | -0.67  | 0.90 |
| -1 | -7 | 2  | 6.61   | 1.02 |
| 6  | 2  | 2  | 0.35   | 0.76 |
| 1  | 7  | -2 | 9.01   | 0.82 |
| 1  | 6  | 4  | 4.66   | 0.59 |
| -6 | 2  | -2 | 0.81   | 0.79 |
| 6  | -2 | 2  | -0.33  | 0.74 |
| -1 | -6 | -4 | 6.03   | 0.82 |
| -1 | 6  | -4 | 6.92   | 0.82 |

|    |    |    |        |      |
|----|----|----|--------|------|
| 1  | -6 | 4  | 8.39   | 0.72 |
| -1 | -1 | -7 | 33.84  | 1.70 |
| -6 | 1  | 3  | 1.00   | 0.73 |
| 6  | -1 | -3 | 1.08   | 0.94 |
| -6 | -1 | 3  | 1.43   | 1.06 |
| 6  | 1  | -3 | 0.93   | 0.93 |
| 1  | 1  | 7  | 27.35  | 1.37 |
| 1  | -1 | 7  | 30.29  | 1.44 |
| -1 | 1  | -7 | 32.27  | 1.65 |
| 1  | 7  | 2  | 16.11  | 1.42 |
| -1 | -7 | -2 | 17.84  | 1.48 |
| -1 | 7  | -2 | 18.28  | 1.66 |
| -3 | -2 | -6 | 106.72 | 2.79 |
| 3  | 2  | 6  | 70.38  | 2.02 |
| 1  | -7 | 2  | 15.27  | 1.36 |
| 3  | -2 | 6  | 73.70  | 2.13 |
| -3 | 2  | -6 | 98.45  | 2.78 |
| -3 | -4 | -5 | 3.44   | 0.78 |
| 3  | 4  | 5  | 2.47   | 0.56 |
| 1  | -4 | -6 | 16.67  | 1.38 |
| -1 | 4  | 6  | 19.74  | 1.56 |
| 3  | -4 | 5  | 2.62   | 0.56 |
| -3 | 4  | -5 | 3.63   | 0.80 |
| -6 | -3 | 1  | 109.35 | 2.77 |
| -1 | -4 | 6  | 21.10  | 1.69 |
| 1  | 4  | -6 | 19.19  | 1.45 |
| 6  | 3  | -1 | 106.35 | 2.48 |
| 2  | 7  | -1 | 0.73   | 0.94 |
| 2  | -7 | -1 | 0.07   | 0.92 |
| 6  | -3 | -1 | 105.73 | 2.47 |
| -6 | 3  | 1  | 102.94 | 2.72 |
| -2 | -7 | 1  | -0.61  | 1.13 |
| -2 | 7  | 1  | -0.15  | 1.13 |
| 2  | 7  | 1  | 14.16  | 1.29 |
| -2 | -7 | -1 | 13.80  | 1.03 |
| 2  | -7 | 1  | 14.37  | 1.30 |
| -2 | 7  | -1 | 11.39  | 1.03 |
| -4 | -5 | -3 | 32.76  | 1.65 |
| 4  | 5  | 3  | 20.53  | 1.32 |
| -4 | 5  | -3 | 26.94  | 1.63 |
| 4  | -5 | 3  | 25.96  | 1.49 |
| -1 | -4 | -6 | 85.38  | 2.56 |
| 1  | 4  | 6  | 65.98  | 2.07 |
| 2  | -5 | -5 | 18.85  | 1.54 |
| -2 | 5  | 5  | 17.77  | 1.76 |
| 0  | -2 | -7 | 25.81  | 1.38 |
| 0  | 2  | 7  | 24.89  | 1.31 |
| 6  | 3  | 1  | 196.23 | 3.27 |
| -6 | -3 | -1 | 207.00 | 3.71 |
| 2  | 5  | -5 | 18.79  | 1.42 |
| -2 | -5 | 5  | 17.68  | 1.14 |
| 1  | -4 | 6  | 80.62  | 2.24 |
| 0  | 2  | -7 | 28.73  | 1.45 |
| -1 | 4  | -6 | 84.89  | 2.52 |
| 6  | -3 | 1  | 203.89 | 3.29 |
| -2 | 0  | 7  | -0.47  | 0.94 |
| 0  | -2 | 7  | 26.01  | 1.44 |
| -6 | 3  | -1 | 193.36 | 3.65 |



|    |    |    |        |      |
|----|----|----|--------|------|
| 2  | 0  | -7 | -0.19  | 0.80 |
| 5  | 4  | -3 | 1.08   | 0.52 |
| 5  | -4 | -3 | 1.02   | 0.53 |
| -5 | 4  | 3  | 2.16   | 0.71 |
| -5 | -4 | 3  | -1.50  | 1.10 |
| 5  | 3  | -4 | 153.89 | 2.95 |
| 5  | -3 | -4 | 160.45 | 2.99 |
| -5 | 3  | 4  | 146.61 | 3.25 |
| -5 | -3 | 4  | 145.91 | 3.27 |
| 5  | 0  | -5 | 2.90   | 0.55 |
| -5 | 0  | 5  | 1.13   | 1.04 |
| 6  | 0  | 3  | 0.40   | 0.76 |
| -6 | 0  | -3 | -1.89  | 0.91 |
| 4  | -6 | 0  | 56.98  | 1.97 |
| -4 | -6 | 0  | 61.56  | 2.22 |
| 4  | 6  | 0  | 56.21  | 1.96 |
| -4 | 6  | 0  | 52.60  | 2.19 |
| -3 | 6  | 3  | 10.55  | 0.86 |
| 3  | -6 | -3 | 10.17  | 0.79 |
| 3  | 6  | -3 | 10.74  | 0.83 |
| -3 | -6 | 3  | 9.70   | 0.95 |
| -5 | -5 | 0  | 16.56  | 1.40 |
| -4 | 0  | 6  | 16.12  | 1.51 |
| 4  | 0  | -6 | 19.74  | 1.33 |
| 5  | 5  | 0  | 13.41  | 1.22 |
| -5 | 5  | 0  | 15.34  | 1.44 |
| 5  | -5 | 0  | 14.66  | 1.25 |
| 1  | -2 | -7 | 3.12   | 0.56 |
| -1 | 2  | 7  | 4.71   | 0.72 |
| -1 | -2 | 7  | 4.44   | 0.81 |
| 1  | 2  | -7 | 4.55   | 0.56 |
| -2 | 1  | 7  | 2.44   | 0.76 |
| 2  | -1 | -7 | 3.16   | 0.53 |
| 2  | 1  | -7 | 3.96   | 0.60 |
| -2 | -1 | 7  | 3.43   | 0.84 |
| -4 | 6  | 1  | 4.31   | 0.79 |
| 4  | 6  | -1 | 4.19   | 0.54 |
| 4  | -6 | -1 | 4.72   | 0.58 |
| -4 | -6 | 1  | 4.82   | 0.77 |
| -4 | -3 | -5 | 87.96  | 2.58 |
| 4  | 3  | 5  | 51.83  | 1.82 |
| -4 | 3  | -5 | 88.51  | 2.61 |
| 4  | -3 | 5  | 57.96  | 1.95 |
| 3  | -3 | -6 | 0.62   | 1.01 |
| -3 | 3  | 6  | -2.13  | 1.35 |
| -6 | -1 | -3 | 6.89   | 0.79 |
| 5  | -1 | -5 | 214.33 | 3.40 |
| -3 | -3 | 6  | 1.25   | 1.07 |
| -5 | 1  | 5  | 206.31 | 3.78 |
| 5  | 1  | -5 | 217.65 | 3.46 |
| 3  | 3  | -6 | 1.43   | 1.01 |
| 6  | 1  | 3  | 5.42   | 0.54 |
| -5 | -1 | 5  | 196.31 | 3.73 |
| 2  | 5  | 5  | 2.18   | 0.54 |
| -6 | 1  | -3 | 5.80   | 0.75 |
| -2 | -5 | -5 | 2.39   | 0.74 |
| 6  | -1 | 3  | 6.86   | 0.64 |
| 5  | 5  | -1 | 1.19   | 0.93 |

|    |    |    |        |      |
|----|----|----|--------|------|
| -5 | -5 | 1  | 2.64   | 0.72 |
| 5  | -5 | -1 | 1.93   | 0.55 |
| -5 | 5  | 1  | 0.26   | 1.04 |
| -2 | 5  | -5 | 3.56   | 0.69 |
| 2  | -5 | 5  | 3.01   | 0.51 |
| 2  | -6 | -4 | 32.45  | 1.84 |
| -2 | 6  | 4  | 29.10  | 1.92 |
| 2  | 6  | -4 | 29.28  | 1.71 |
| -2 | -6 | 4  | 31.54  | 1.93 |
| 3  | 6  | 3  | 69.43  | 2.14 |
| -3 | -6 | -3 | 83.86  | 2.61 |
| -4 | 1  | 6  | 104.93 | 2.78 |
| 4  | -1 | -6 | 109.94 | 2.52 |
| -4 | -6 | -1 | 94.32  | 2.71 |
| -4 | -1 | 6  | 110.64 | 2.81 |
| 4  | 1  | -6 | 105.11 | 2.54 |
| 4  | 6  | 1  | 92.15  | 2.43 |
| 4  | -6 | 1  | 87.61  | 2.38 |
| 3  | -6 | 3  | 76.21  | 2.32 |
| 6  | -2 | -3 | 135.60 | 2.80 |
| -3 | 6  | -3 | 81.52  | 2.67 |
| -6 | -2 | 3  | 127.86 | 3.04 |
| 1  | 2  | 7  | 34.60  | 1.58 |
| -4 | 6  | -1 | 89.82  | 2.69 |
| -1 | -2 | -7 | 44.04  | 1.93 |
| 6  | 2  | -3 | 135.88 | 2.80 |
| -6 | 2  | 3  | 124.53 | 3.05 |
| -1 | 2  | -7 | 46.96  | 1.99 |
| 1  | -2 | 7  | 42.92  | 1.70 |
| 6  | 3  | -2 | 2.28   | 0.55 |
| -6 | -3 | 2  | 3.37   | 0.71 |
| -6 | 3  | 2  | 3.74   | 0.75 |
| 6  | -3 | -2 | 1.79   | 0.59 |
| 2  | 0  | 7  | -1.15  | 0.83 |
| -2 | 0  | -7 | -0.39  | 1.01 |
| 5  | 5  | 1  | -1.98  | 0.89 |
| -5 | -5 | -1 | -1.05  | 1.02 |
| 5  | -5 | 1  | 0.53   | 0.88 |
| -5 | 5  | -1 | -0.27  | 0.93 |
| 2  | -7 | -2 | 24.53  | 1.64 |
| -2 | 7  | 2  | 21.96  | 1.82 |
| 5  | 4  | 3  | 10.26  | 0.73 |
| 2  | 7  | -2 | 21.79  | 1.61 |
| -5 | -4 | -3 | 18.28  | 1.43 |
| -2 | -7 | 2  | 23.49  | 1.80 |
| -5 | 4  | -3 | 17.17  | 1.41 |
| 5  | -4 | 3  | 16.11  | 1.25 |
| -2 | 4  | 6  | 14.41  | 1.23 |
| 2  | -4 | -6 | 14.81  | 1.09 |
| 2  | 4  | -6 | 16.80  | 1.60 |
| -2 | -4 | 6  | 23.41  | 1.93 |
| 0  | -7 | -3 | 15.90  | 1.44 |
| 2  | 6  | 4  | 72.94  | 2.18 |
| 0  | 7  | 3  | 17.16  | 1.39 |
| -2 | -6 | -4 | 91.99  | 2.69 |
| -2 | -7 | -2 | 110.04 | 3.02 |
| 2  | 7  | 2  | 92.89  | 2.53 |
| 0  | 7  | -3 | 14.94  | 1.41 |

|    |    |    |        |      |
|----|----|----|--------|------|
| -2 | 6  | -4 | 86.06  | 2.70 |
| 0  | -7 | 3  | 16.71  | 1.39 |
| 2  | -6 | 4  | 85.99  | 2.46 |
| 2  | -7 | 2  | 102.27 | 2.71 |
| -2 | 7  | -2 | 104.40 | 3.04 |
| -5 | -3 | -4 | 34.90  | 1.69 |
| 5  | 3  | 4  | 15.57  | 1.14 |
| 2  | -1 | 7  | 7.46   | 0.70 |
| -5 | 3  | -4 | 36.38  | 1.68 |
| -2 | 1  | -7 | 7.71   | 0.83 |
| 2  | 1  | 7  | 5.49   | 0.58 |
| -2 | -1 | -7 | 9.20   | 0.83 |
| 5  | -3 | 4  | 24.85  | 1.43 |
| -6 | -3 | -2 | 3.15   | 0.74 |
| 6  | 3  | 2  | 2.95   | 0.53 |
| 6  | -3 | 2  | 2.98   | 0.54 |
| -6 | 3  | -2 | 3.90   | 0.70 |
| 1  | -7 | -3 | 6.13   | 0.72 |
| -1 | 7  | 3  | 4.45   | 0.98 |
| 3  | 3  | 6  | 63.51  | 2.08 |
| -3 | -3 | -6 | 87.46  | 2.64 |
| 1  | 7  | -3 | 5.64   | 0.66 |
| -1 | -7 | 3  | 5.48   | 0.92 |
| 3  | -3 | 6  | 67.14  | 2.15 |
| -3 | 3  | -6 | 93.22  | 2.71 |
| 5  | 0  | 5  | 6.74   | 0.66 |
| -5 | 0  | -5 | 12.40  | 0.93 |
| -4 | -6 | 2  | 10.61  | 0.95 |
| -2 | 2  | 7  | 4.30   | 0.79 |
| 4  | 6  | -2 | 11.75  | 0.80 |
| 4  | -6 | -2 | 11.16  | 0.81 |
| 2  | -2 | -7 | 3.60   | 0.55 |
| -4 | 6  | 2  | 10.47  | 0.92 |
| 2  | 2  | -7 | 3.45   | 0.61 |
| -2 | -2 | 7  | 1.84   | 1.27 |
| 2  | 4  | 6  | 5.92   | 0.61 |
| -2 | -4 | -6 | 7.30   | 0.97 |
| -4 | 0  | -6 | 24.49  | 1.61 |
| 4  | 0  | 6  | 14.85  | 1.20 |
| 5  | 5  | -2 | 17.11  | 1.31 |
| -1 | -7 | -3 | 72.41  | 2.61 |
| 5  | -5 | -2 | 19.60  | 1.35 |
| -5 | 5  | 2  | 13.12  | 1.01 |
| 1  | 7  | 3  | 72.01  | 2.28 |
| -5 | -5 | 2  | 18.41  | 1.51 |
| 2  | -4 | 6  | 6.56   | 0.63 |
| -2 | 4  | -6 | 7.54   | 0.91 |
| 1  | -7 | 3  | 68.49  | 2.27 |
| -1 | 7  | -3 | 73.00  | 2.70 |
| 5  | 2  | -5 | 8.57   | 0.65 |
| 5  | -2 | -5 | 8.53   | 0.65 |
| -6 | -2 | -3 | 4.09   | 0.71 |
| 6  | 2  | 3  | 4.82   | 0.51 |
| -5 | 2  | 5  | 8.36   | 0.88 |
| -5 | -2 | 5  | 7.92   | 0.89 |
| -6 | 2  | -3 | 5.86   | 0.68 |
| 6  | -2 | 3  | 3.91   | 0.51 |
| 3  | 7  | 0  | 31.40  | 1.66 |

|    |    |    |        |      |
|----|----|----|--------|------|
| -3 | -7 | 0  | 30.38  | 1.81 |
| -3 | 7  | 0  | 31.25  | 1.82 |
| 3  | -7 | 0  | 29.90  | 1.64 |
| 4  | -2 | -6 | 37.94  | 1.66 |
| -4 | 2  | 6  | 31.76  | 1.90 |
| 6  | 0  | -4 | 151.47 | 3.00 |
| -4 | -2 | 6  | 34.73  | 1.89 |
| 4  | 2  | -6 | 33.99  | 1.65 |
| -6 | 0  | 4  | 141.72 | 3.26 |
| 5  | 1  | 5  | 47.21  | 1.84 |
| -5 | -1 | -5 | 104.33 | 2.72 |
| 5  | -1 | 5  | 58.38  | 1.96 |
| -5 | 1  | -5 | 101.04 | 2.75 |
| 0  | 3  | 7  | 62.82  | 2.01 |
| 0  | -3 | -7 | 66.68  | 2.02 |
| 0  | -3 | 7  | 67.79  | 2.09 |
| 0  | 3  | -7 | 67.89  | 2.08 |
| -4 | -1 | -6 | 139.11 | 3.24 |
| -4 | -6 | -2 | 67.96  | 2.45 |
| -4 | 5  | 4  | 35.04  | 1.91 |
| 4  | -5 | -4 | 29.57  | 1.58 |
| 4  | 1  | 6  | 75.70  | 2.17 |
| 4  | 6  | 2  | 58.37  | 2.02 |
| 4  | -1 | 6  | 83.12  | 2.28 |
| -4 | -5 | 4  | 32.61  | 1.93 |
| -4 | 1  | -6 | 145.58 | 3.27 |
| 4  | 5  | -4 | 33.07  | 1.65 |
| 4  | -6 | 2  | 68.45  | 2.12 |
| -4 | 6  | -2 | 58.71  | 2.29 |
| 4  | -4 | -5 | 37.88  | 1.76 |
| -4 | 4  | 5  | 34.77  | 1.90 |
| -3 | -7 | 1  | 58.87  | 2.34 |
| -3 | 7  | 1  | 55.08  | 2.37 |
| -4 | -4 | 5  | 38.47  | 2.06 |
| 3  | 7  | -1 | 56.87  | 2.12 |
| 4  | 4  | -5 | 39.07  | 1.82 |
| 3  | -7 | -1 | 69.63  | 2.23 |
| 6  | 4  | 0  | -0.36  | 0.94 |
| -6 | -4 | 0  | -1.14  | 0.91 |
| -6 | 4  | 0  | -1.97  | 1.13 |
| 6  | -4 | 0  | 1.66   | 0.53 |
| 5  | 5  | 2  | 55.47  | 1.91 |
| -5 | -5 | -2 | 66.88  | 2.37 |
| -5 | 5  | -2 | 61.78  | 2.32 |
| 6  | -1 | -4 | 20.70  | 1.33 |
| 5  | -5 | 2  | 62.05  | 2.10 |
| -6 | 1  | 4  | 18.10  | 1.54 |
| -6 | -1 | 4  | 16.74  | 1.52 |
| 6  | 1  | -4 | 22.79  | 1.43 |
| -1 | 3  | 7  | 44.60  | 2.08 |
| 1  | -3 | -7 | 47.29  | 1.90 |
| 3  | 7  | 1  | 42.89  | 1.86 |
| -3 | -7 | -1 | 46.89  | 2.18 |
| -1 | -3 | 7  | 44.71  | 2.14 |
| 1  | 3  | -7 | 45.44  | 1.95 |
| 3  | 0  | -7 | 155.42 | 3.62 |
| -3 | 0  | 7  | 153.51 | 4.06 |
| 3  | -5 | -5 | 10.55  | 1.00 |

|    |    |    |        |      |
|----|----|----|--------|------|
| 7  | 0  | 0  | 0.52   | 0.79 |
| -7 | 0  | 0  | 1.42   | 0.56 |
| -3 | 7  | -1 | 44.94  | 2.24 |
| -3 | 5  | 5  | 9.69   | 1.06 |
| 3  | -7 | 1  | 44.39  | 1.93 |
| 3  | 5  | -5 | 9.12   | 0.76 |
| -3 | -5 | 5  | 9.74   | 1.06 |
| 2  | 2  | 7  | 53.13  | 1.90 |
| -2 | -2 | -7 | 67.43  | 2.40 |
| -2 | 2  | -7 | 70.45  | 2.39 |
| 2  | -2 | 7  | 57.28  | 2.02 |
| 6  | 4  | -1 | 130.34 | 2.81 |
| -6 | -4 | 1  | 123.91 | 3.14 |
| 6  | -4 | -1 | 131.34 | 2.82 |
| -6 | 4  | 1  | 119.98 | 3.06 |
| -7 | 0  | 1  | 1.06   | 1.02 |
| 7  | 0  | -1 | 0.42   | 0.76 |
| 0  | 6  | 5  | 1.83   | 0.54 |
| 0  | -6 | -5 | 3.05   | 0.55 |
| 1  | 3  | 7  | -6.78  | 1.44 |
| -6 | 3  | 3  | 17.18  | 1.54 |
| 0  | -6 | 5  | 2.64   | 0.58 |
| -1 | -3 | -7 | -0.21  | 1.20 |
| 6  | -3 | -3 | 18.01  | 1.39 |
| 0  | 6  | -5 | 3.19   | 0.55 |
| 6  | 3  | -3 | 17.77  | 1.34 |
| -6 | -3 | 3  | 14.72  | 1.46 |
| -1 | 3  | -7 | 1.60   | 1.08 |
| -3 | 1  | 7  | -2.05  | 1.18 |
| 1  | -3 | 7  | 2.04   | 0.52 |
| 3  | -1 | -7 | 0.35   | 1.02 |
| -7 | -1 | 0  | 21.41  | 1.58 |
| 3  | 1  | -7 | -0.14  | 1.15 |
| -3 | -1 | 7  | -1.14  | 1.36 |
| 7  | 1  | 0  | 18.95  | 1.28 |
| 7  | -1 | 0  | 21.54  | 1.36 |
| -7 | 1  | 0  | 22.36  | 1.47 |
| -6 | -4 | -1 | 3.64   | 0.77 |
| 6  | 4  | 1  | 2.93   | 0.57 |
| -6 | 4  | -1 | 3.96   | 0.78 |
| 6  | -4 | 1  | 4.94   | 0.58 |
| -5 | 4  | 4  | 20.27  | 1.57 |
| 5  | -4 | -4 | 22.44  | 1.44 |
| -5 | -4 | 4  | 20.64  | 1.65 |
| 5  | 4  | -4 | 20.64  | 1.46 |
| 0  | -5 | -6 | 10.73  | 0.82 |
| 0  | 5  | 6  | 9.92   | 0.83 |
| -2 | 7  | 3  | 1.38   | 1.22 |
| 2  | -7 | -3 | 0.13   | 1.06 |
| 0  | 5  | -6 | 9.67   | 0.82 |
| 0  | -5 | 6  | 9.84   | 0.82 |
| 4  | 5  | 4  | 9.63   | 0.81 |
| -4 | -5 | -4 | 18.41  | 1.50 |
| -2 | -7 | 3  | 1.18   | 1.04 |
| 2  | 7  | -3 | 0.13   | 1.00 |
| -7 | 0  | -1 | 4.91   | 0.75 |
| 7  | 0  | 1  | 5.06   | 0.52 |
| 7  | -1 | -1 | 34.84  | 1.62 |

|    |    |    |        |      |
|----|----|----|--------|------|
| -7 | -1 | 1  | 35.58  | 1.80 |
| 7  | 1  | -1 | 35.14  | 1.62 |
| -7 | 1  | 1  | 34.47  | 1.78 |
| -4 | 5  | -4 | 16.47  | 1.52 |
| 4  | -5 | 4  | 13.25  | 0.92 |
| 1  | -6 | -5 | 11.54  | 0.94 |
| -1 | 6  | 5  | 8.19   | 1.04 |
| 1  | 6  | -5 | 8.92   | 0.72 |
| 3  | -6 | -4 | 4.95   | 0.70 |
| -1 | -6 | 5  | 9.52   | 0.92 |
| -3 | 6  | 4  | 5.20   | 0.90 |
| -3 | -6 | 4  | 5.37   | 0.92 |
| 3  | 6  | -4 | 4.06   | 0.68 |
| -5 | -2 | -5 | 1.34   | 1.10 |
| 5  | 2  | 5  | -0.05  | 0.88 |
| 5  | -2 | 5  | 1.89   | 0.48 |
| -5 | 2  | -5 | 2.82   | 0.65 |
| -3 | -5 | -5 | 7.90   | 0.92 |
| 3  | 5  | 5  | 5.60   | 0.61 |
| -1 | 5  | 6  | 71.35  | 2.68 |
| 1  | -5 | -6 | 77.36  | 2.39 |
| -4 | -2 | -6 | 4.19   | 0.77 |
| 4  | 2  | 6  | 1.35   | 0.51 |
| -3 | 5  | -5 | 6.76   | 0.84 |
| 3  | -5 | 5  | 6.02   | 0.61 |
| 4  | 4  | 5  | 10.51  | 0.83 |
| -1 | -5 | 6  | 76.45  | 2.82 |
| -2 | -7 | -3 | 1.27   | 0.85 |
| -4 | 2  | -6 | -0.15  | 1.02 |
| 4  | -2 | 6  | 0.96   | 0.93 |
| -4 | -4 | -5 | 22.11  | 1.58 |
| 6  | 0  | 4  | 13.49  | 1.09 |
| -6 | 0  | -4 | 14.61  | 1.39 |
| 2  | 7  | 3  | 0.70   | 1.10 |
| 1  | 5  | -6 | 85.05  | 2.57 |
| -1 | -6 | -5 | 25.46  | 1.61 |
| 1  | 6  | 5  | 22.01  | 1.44 |
| 3  | -4 | -6 | 100.43 | 2.88 |
| 2  | -7 | 3  | 1.30   | 1.03 |
| -2 | 7  | -3 | 1.83   | 0.81 |
| 4  | -4 | 5  | 16.65  | 1.27 |
| 0  | 8  | 0  | 63.83  | 2.27 |
| 0  | -8 | 0  | 73.37  | 2.40 |
| -4 | 4  | -5 | 20.41  | 1.56 |
| -3 | 4  | 6  | 101.26 | 3.33 |
| -3 | -4 | 6  | 95.43  | 3.07 |
| 3  | 7  | -2 | 0.70   | 1.02 |
| 3  | 4  | -6 | 93.34  | 2.82 |
| -3 | -7 | 2  | 0.56   | 1.14 |
| 1  | -6 | 5  | 19.36  | 1.59 |
| 3  | -7 | -2 | 0.06   | 1.10 |
| -3 | 7  | 2  | 0.81   | 1.19 |
| -1 | 6  | -5 | 23.57  | 1.69 |
| -7 | -1 | -1 | 39.39  | 1.83 |
| 7  | 1  | 1  | 37.66  | 1.67 |
| 7  | -1 | 1  | 40.33  | 1.64 |
| -7 | 1  | -1 | 39.93  | 1.91 |
| -6 | 2  | 4  | 68.86  | 2.56 |

|    |    |    |        |      |
|----|----|----|--------|------|
| 6  | 2  | -4 | 72.43  | 2.20 |
| -6 | -2 | 4  | 72.25  | 2.50 |
| 6  | -2 | -4 | 81.84  | 2.31 |
| -3 | 0  | -7 | 2.24   | 0.81 |
| 3  | 0  | 7  | 2.01   | 0.50 |
| 6  | -4 | -2 | 3.97   | 0.62 |
| -6 | -4 | 2  | 6.55   | 0.84 |
| 6  | 4  | -2 | 3.06   | 0.60 |
| 1  | 5  | 6  | 16.00  | 1.27 |
| -1 | -5 | -6 | 18.60  | 1.59 |
| -6 | 4  | 2  | 2.89   | 0.85 |
| 4  | -6 | -3 | 0.65   | 0.87 |
| 2  | -3 | -7 | 96.55  | 2.58 |
| -2 | 3  | 7  | 95.10  | 2.84 |
| -4 | 6  | 3  | -0.94  | 1.17 |
| 1  | -5 | 6  | 18.33  | 1.33 |
| -4 | -6 | 3  | -0.17  | 1.14 |
| -1 | 5  | -6 | 21.47  | 1.62 |
| 4  | 6  | -3 | 0.48   | 0.91 |
| 2  | 3  | -7 | 98.77  | 2.83 |
| -2 | -3 | 7  | 94.03  | 3.12 |
| -7 | 0  | 2  | -0.56  | 0.96 |
| -5 | -5 | 3  | 0.35   | 1.05 |
| 7  | 0  | -2 | 0.66   | 0.56 |
| -5 | 5  | 3  | -0.15  | 1.02 |
| 5  | -5 | -3 | 0.66   | 0.97 |
| 5  | 5  | -3 | -1.42  | 0.93 |
| -3 | -7 | -2 | 32.52  | 1.93 |
| 3  | 7  | 2  | 28.94  | 1.65 |
| 6  | -1 | 4  | 50.23  | 1.88 |
| -6 | -1 | -4 | 72.00  | 2.40 |
| 6  | 1  | 4  | 49.50  | 1.89 |
| -6 | 1  | -4 | 68.51  | 2.36 |
| 0  | -8 | -1 | 4.47   | 0.67 |
| -3 | 7  | -2 | 27.50  | 1.90 |
| 3  | -7 | 2  | 32.14  | 1.75 |
| 3  | 6  | 4  | 83.11  | 2.42 |
| -3 | -6 | -4 | 102.56 | 2.96 |
| 0  | 8  | 1  | 5.21   | 0.67 |
| -5 | 3  | 5  | 19.99  | 1.65 |
| 6  | 3  | 3  | 27.30  | 1.48 |
| 5  | 3  | -5 | 22.58  | 1.46 |
| -5 | -3 | 5  | 22.17  | 1.64 |
| -6 | -3 | -3 | 30.30  | 1.67 |
| 5  | -3 | -5 | 19.23  | 1.47 |
| 0  | -8 | 1  | 5.34   | 0.67 |
| 0  | 8  | -1 | 5.49   | 0.68 |
| -6 | 3  | -3 | 31.22  | 1.75 |
| 6  | -3 | 3  | 29.62  | 1.51 |
| -3 | 6  | -4 | 94.58  | 2.89 |
| 3  | -6 | 4  | 98.64  | 2.61 |
| -1 | -8 | 0  | 1.57   | 0.86 |
| 1  | -8 | 0  | 1.55   | 0.60 |
| 1  | 8  | 0  | 0.85   | 1.08 |
| -1 | 8  | 0  | 0.07   | 1.23 |
| -4 | 3  | 6  | 3.91   | 0.88 |
| 4  | -3 | -6 | 4.33   | 0.61 |
| 4  | 3  | -6 | 1.57   | 1.11 |

|    |    |    |       |      |
|----|----|----|-------|------|
| -4 | -3 | 6  | 4.72  | 0.80 |
| -3 | 2  | 7  | 61.53 | 2.85 |
| 3  | -2 | -7 | 59.65 | 2.44 |
| -3 | -1 | -7 | 56.10 | 2.18 |
| 3  | 1  | 7  | 35.37 | 1.70 |
| 3  | -1 | 7  | 38.52 | 1.75 |
| 7  | 2  | 0  | -0.44 | 0.92 |
| 3  | 2  | -7 | 61.78 | 2.37 |
| -3 | -2 | 7  | 57.38 | 2.59 |
| -7 | -2 | 0  | -0.15 | 0.95 |
| -3 | 1  | -7 | 55.17 | 2.29 |
| 7  | -2 | 0  | 0.21  | 0.91 |
| -7 | 2  | 0  | 0.55  | 1.00 |
| -5 | -4 | -4 | -0.70 | 0.92 |
| 5  | 4  | 4  | -0.76 | 0.92 |
| 5  | -4 | 4  | 0.33  | 0.80 |
| 7  | 1  | -2 | 0.69  | 0.96 |
| -7 | -1 | 2  | 3.85  | 0.77 |
| 7  | -1 | -2 | 2.86  | 0.56 |
| -5 | 4  | -4 | 0.06  | 1.02 |
| 0  | -7 | -4 | 60.14 | 2.26 |
| 0  | 7  | 4  | 54.30 | 2.20 |
| -7 | 1  | 2  | 4.07  | 0.72 |
| 0  | 7  | -4 | 55.57 | 2.15 |
| 0  | -7 | 4  | 57.90 | 2.18 |
| 7  | 2  | -1 | -0.60 | 0.80 |
| -7 | -2 | 1  | 0.54  | 0.93 |
| 1  | -8 | -1 | 58.47 | 2.26 |
| 7  | -2 | -1 | -0.45 | 0.93 |
| -1 | 8  | 1  | 52.95 | 2.39 |
| -7 | 2  | 1  | -0.37 | 0.97 |
| -1 | -8 | 1  | 53.81 | 2.47 |
| 1  | 8  | -1 | 53.92 | 2.18 |
| 1  | 8  | 1  | 18.18 | 1.43 |
| -1 | -8 | -1 | 18.61 | 1.60 |
| -6 | -4 | -2 | 3.53  | 0.78 |
| 6  | 4  | 2  | 3.54  | 0.56 |
| 1  | -8 | 1  | 15.92 | 1.57 |
| -1 | 8  | -1 | 15.58 | 1.19 |
| 6  | -4 | 2  | 3.51  | 0.60 |
| -6 | 4  | -2 | 3.02  | 0.80 |
| -4 | -6 | -3 | 49.91 | 2.31 |
| 4  | 6  | 3  | 34.84 | 1.67 |
| 4  | -6 | 3  | 45.19 | 1.90 |
| -4 | 6  | -3 | 45.63 | 2.22 |
| 3  | 4  | 6  | 51.33 | 2.00 |
| -3 | -4 | -6 | 81.92 | 2.66 |
| -2 | 6  | 5  | 43.40 | 2.27 |
| 2  | -6 | -5 | 44.39 | 2.16 |
| 3  | -4 | 6  | 61.48 | 2.14 |
| -3 | 4  | -6 | 75.25 | 2.57 |
| -2 | -3 | -7 | 37.75 | 1.95 |
| 2  | 6  | -5 | 38.91 | 2.06 |
| -2 | -6 | 5  | 44.47 | 2.27 |
| 2  | 3  | 7  | 24.87 | 1.55 |
| 1  | -7 | -4 | 10.89 | 0.97 |
| -1 | 7  | 4  | 9.38  | 1.04 |
| -7 | 0  | -2 | 0.26  | 0.92 |



|    |    |    |       |      |
|----|----|----|-------|------|
| -2 | 3  | -7 | 35.56 | 2.00 |
| 2  | -3 | 7  | 28.32 | 1.66 |
| 7  | 0  | 2  | 0.38  | 0.77 |
| 1  | 7  | -4 | 12.02 | 0.92 |
| -1 | -7 | 4  | 10.40 | 1.05 |
| -5 | -5 | -3 | 41.41 | 1.95 |
| 5  | 5  | 3  | 20.91 | 1.40 |
| -5 | 5  | -3 | 41.17 | 2.02 |
| 5  | -5 | 3  | 38.60 | 1.77 |
| 2  | -5 | -6 | 1.76  | 1.18 |
| -2 | 5  | 6  | 2.08  | 1.46 |
| -7 | -2 | -1 | 1.45  | 0.65 |
| 7  | 2  | 1  | 0.54  | 0.93 |
| -7 | 2  | -1 | 1.39  | 0.65 |
| -2 | -5 | 6  | 1.08  | 1.16 |
| 7  | -2 | 1  | -0.28 | 0.88 |
| 2  | 5  | -6 | 0.88  | 0.64 |
| 5  | 0  | -6 | -1.59 | 1.01 |
| -5 | 0  | 6  | 0.61  | 1.16 |
| -1 | -7 | -4 | 0.62  | 1.14 |
| 1  | 7  | 4  | 0.79  | 0.95 |
| -5 | -6 | 0  | 59.74 | 2.37 |
| 5  | 6  | 0  | 55.36 | 2.11 |
| -5 | 6  | 0  | 58.73 | 2.39 |
| 5  | -6 | 0  | 63.88 | 2.14 |
| -1 | 7  | -4 | -1.39 | 1.25 |
| 1  | -7 | 4  | 0.26  | 0.95 |
| 0  | 0  | 8  | 18.75 | 1.24 |
| 0  | 0  | -8 | 16.58 | 1.23 |
| 0  | 4  | 7  | 30.42 | 1.65 |
| 0  | -4 | -7 | 34.27 | 1.65 |
| 0  | -4 | 7  | 34.83 | 1.65 |
| 0  | 4  | -7 | 31.61 | 1.69 |
| 7  | -1 | 2  | 11.77 | 1.15 |
| -6 | -2 | -4 | 0.05  | 0.96 |
| 7  | 1  | 2  | 8.17  | 0.79 |
| -7 | -1 | -2 | 8.97  | 0.91 |
| 6  | 2  | 4  | 0.76  | 0.78 |
| -7 | 1  | -2 | 8.88  | 0.91 |
| -6 | 2  | -4 | -1.01 | 0.99 |
| 6  | -2 | 4  | 0.05  | 0.78 |
| 2  | 6  | 5  | 27.12 | 1.66 |
| 5  | 6  | -1 | 28.34 | 1.60 |
| -2 | -6 | -5 | 38.72 | 1.94 |
| -5 | -6 | 1  | 32.97 | 1.86 |
| 5  | -6 | -1 | 29.73 | 1.65 |
| -5 | 6  | 1  | 30.49 | 1.76 |
| 0  | -8 | -2 | 38.45 | 1.92 |
| 2  | -6 | 5  | 32.65 | 1.75 |
| -2 | 6  | -5 | 33.17 | 1.93 |
| 0  | 8  | 2  | 40.03 | 1.85 |
| 0  | -8 | 2  | 40.20 | 1.90 |
| 0  | 8  | -2 | 36.23 | 1.88 |
| 1  | 0  | -8 | 0.49  | 0.76 |
| -1 | 0  | 8  | -1.02 | 0.96 |
| 5  | -1 | -6 | 1.63  | 1.20 |
| -5 | 1  | 6  | 3.25  | 0.93 |
| 5  | 1  | -6 | 2.93  | 0.66 |

|    |    |    |        |      |
|----|----|----|--------|------|
| -5 | -1 | 6  | 2.87   | 0.88 |
| -1 | 4  | 7  | 7.51   | 0.92 |
| 1  | -4 | -7 | 8.23   | 0.71 |
| -3 | -2 | -7 | 3.59   | 0.86 |
| 1  | 4  | -7 | 8.21   | 0.70 |
| 0  | -1 | -8 | 30.10  | 1.50 |
| 3  | 2  | 7  | 1.53   | 1.07 |
| 0  | 1  | 8  | 30.21  | 1.54 |
| -1 | -4 | 7  | 8.62   | 0.96 |
| -5 | -3 | -5 | 3.24   | 0.77 |
| 3  | -2 | 7  | 3.16   | 0.61 |
| 0  | 1  | -8 | 30.18  | 1.55 |
| 0  | -1 | 8  | 28.63  | 1.57 |
| -3 | 2  | -7 | 4.89   | 0.85 |
| 5  | 3  | 5  | 0.71   | 0.83 |
| 5  | -3 | 5  | 1.28   | 0.93 |
| -5 | 3  | -5 | 2.92   | 0.71 |
| 4  | 3  | 6  | 8.43   | 0.82 |
| 5  | 6  | 1  | 50.72  | 1.95 |
| -4 | -3 | -6 | 20.26  | 1.51 |
| -5 | -6 | -1 | 55.47  | 2.27 |
| 2  | 5  | 6  | 1.72   | 0.54 |
| -7 | 2  | 2  | 39.18  | 2.01 |
| 7  | -2 | -2 | 39.62  | 1.78 |
| -2 | -5 | -6 | 4.10   | 0.76 |
| 7  | 2  | -2 | 37.77  | 1.72 |
| -7 | -2 | 2  | 40.13  | 1.92 |
| 4  | -3 | 6  | 12.51  | 1.17 |
| 5  | -6 | 1  | 55.63  | 2.05 |
| -4 | 3  | -6 | 19.08  | 1.56 |
| -5 | 6  | -1 | 48.99  | 2.17 |
| -2 | -8 | 0  | -2.15  | 1.43 |
| -2 | 5  | -6 | 1.15   | 1.11 |
| 2  | 8  | 0  | 0.93   | 1.04 |
| 2  | -5 | 6  | 2.08   | 0.54 |
| 2  | -8 | 0  | -0.09  | 1.08 |
| -2 | 8  | 0  | -0.77  | 1.36 |
| 4  | 7  | 0  | 21.32  | 1.51 |
| -4 | -7 | 0  | 19.26  | 1.58 |
| 4  | -7 | 0  | 19.32  | 1.48 |
| 3  | -7 | -3 | 70.39  | 2.51 |
| -4 | 7  | 0  | 20.03  | 1.71 |
| -3 | 7  | 3  | 57.15  | 2.58 |
| -3 | -7 | 3  | 62.93  | 2.66 |
| 3  | 7  | -3 | 69.07  | 2.37 |
| 1  | -8 | -2 | 3.39   | 0.69 |
| 1  | -1 | -8 | 5.26   | 0.61 |
| -1 | 8  | 2  | 3.01   | 0.91 |
| 1  | 1  | -8 | 7.78   | 0.77 |
| -1 | 1  | 8  | 8.64   | 0.90 |
| -1 | -1 | 8  | 7.17   | 0.83 |
| 1  | 8  | -2 | 4.58   | 0.64 |
| -1 | -8 | 2  | 4.04   | 0.93 |
| -1 | 0  | -8 | -1.36  | 1.04 |
| 6  | -3 | -4 | 16.73  | 1.35 |
| 1  | 0  | 8  | -0.91  | 0.86 |
| -6 | 3  | 4  | 13.17  | 1.13 |
| 6  | 4  | -3 | 188.90 | 3.55 |

|    |    |    |        |      |
|----|----|----|--------|------|
| -6 | -4 | 3  | 178.12 | 3.80 |
| 1  | 4  | 7  | -1.46  | 1.02 |
| 6  | 3  | -4 | 13.01  | 1.30 |
| 6  | -4 | -3 | 197.28 | 3.53 |
| -6 | 4  | 3  | 171.18 | 3.74 |
| -1 | -4 | -7 | 0.74   | 1.06 |
| -6 | -3 | 4  | 13.43  | 1.04 |
| 6  | 0  | -5 | 1.03   | 1.01 |
| -6 | 0  | 5  | 1.01   | 1.18 |
| -1 | 4  | -7 | -0.51  | 1.02 |
| -1 | -8 | -2 | -0.06  | 1.31 |
| 1  | 8  | 2  | 2.70   | 0.62 |
| 1  | -4 | 7  | -0.36  | 0.89 |
| 7  | 0  | -3 | 37.63  | 1.75 |
| -7 | 0  | 3  | 37.28  | 1.95 |
| 1  | -8 | 2  | 0.73   | 1.12 |
| -1 | 8  | -2 | 1.62   | 1.21 |
| 4  | -7 | -1 | 14.41  | 1.35 |
| -4 | -7 | 1  | 12.57  | 1.09 |
| -4 | 0  | 7  | -1.51  | 1.22 |
| 4  | 7  | -1 | 12.12  | 0.95 |
| -4 | 7  | 1  | 12.06  | 1.08 |
| 4  | 0  | -7 | 0.15   | 0.99 |
| -2 | 8  | 1  | 0.38   | 1.17 |
| 2  | -8 | -1 | 0.05   | 1.15 |
| 2  | 8  | -1 | 1.15   | 1.01 |
| -2 | -8 | 1  | -0.16  | 1.03 |
| -4 | 5  | 5  | 51.25  | 2.46 |
| 4  | -5 | -5 | 59.04  | 2.21 |
| -4 | -5 | 5  | 59.94  | 2.50 |
| 4  | 5  | -5 | 59.08  | 2.23 |
| -2 | -8 | -1 | 0.28   | 1.15 |
| 2  | 8  | 1  | -1.22  | 1.09 |
| -2 | 8  | -1 | 2.59   | 0.76 |
| 2  | -8 | 1  | -1.25  | 1.05 |
| -6 | -5 | 0  | 0.89   | 1.04 |
| 6  | 5  | 0  | 0.66   | 1.04 |
| -6 | 5  | 0  | 2.10   | 0.76 |
| 6  | -5 | 0  | 1.15   | 1.00 |
| 2  | -7 | -4 | -2.62  | 1.26 |
| -2 | 7  | 4  | -0.81  | 1.42 |
| 2  | 7  | -4 | -0.29  | 1.08 |
| -2 | -7 | 4  | -2.58  | 1.34 |
| 1  | 1  | 8  | 1.10   | 0.82 |
| -4 | -7 | -1 | 10.79  | 1.07 |
| 3  | 7  | 3  | 2.21   | 0.62 |
| 4  | 7  | 1  | 10.26  | 0.96 |
| -3 | -7 | -3 | 1.67   | 0.81 |
| -1 | -1 | -8 | 1.03   | 0.92 |
| -1 | 1  | -8 | -1.37  | 1.07 |
| 4  | -7 | 1  | 12.07  | 0.93 |
| 1  | -1 | 8  | -0.63  | 0.84 |
| -4 | 7  | -1 | 12.97  | 1.03 |
| -6 | 1  | 5  | 4.61   | 0.91 |
| -3 | 7  | -3 | 0.90   | 1.15 |
| 3  | -7 | 3  | 2.13   | 0.62 |
| 6  | -1 | -5 | 4.01   | 0.67 |
| -3 | 3  | 7  | 0.54   | 1.48 |

|    |    |    |       |      |
|----|----|----|-------|------|
| 3  | -3 | -7 | -1.37 | 1.26 |
| 6  | 1  | -5 | 3.50  | 0.65 |
| -6 | -1 | 5  | 4.05  | 0.91 |
| 7  | 3  | 0  | 91.37 | 2.44 |
| -7 | -1 | 3  | 56.56 | 2.24 |
| 3  | 3  | -7 | 0.82  | 1.13 |
| -7 | 1  | 3  | 61.32 | 2.35 |
| -7 | -3 | 0  | 96.45 | 2.80 |
| 7  | 1  | -3 | 56.34 | 2.01 |
| -3 | -3 | 7  | -0.37 | 1.23 |
| 7  | -1 | -3 | 61.89 | 2.11 |
| 7  | -3 | 0  | 98.79 | 2.59 |
| -7 | 3  | 0  | 89.41 | 2.76 |
| 4  | -1 | -7 | 3.82  | 0.66 |
| -4 | 1  | 7  | 3.65  | 0.90 |
| 7  | 2  | 2  | 31.26 | 1.71 |
| -7 | -2 | -2 | 35.54 | 1.90 |
| -7 | 2  | -2 | 29.15 | 1.82 |
| 6  | -5 | -1 | 45.88 | 2.02 |
| 4  | 1  | -7 | 4.77  | 0.66 |
| -6 | 5  | 1  | 46.81 | 2.17 |
| 7  | -2 | 2  | 31.21 | 1.64 |
| -6 | -5 | 1  | 45.61 | 2.08 |
| 6  | 5  | -1 | 46.62 | 1.96 |
| -4 | -1 | 7  | 3.67  | 0.98 |
| 5  | 6  | -2 | 19.45 | 1.40 |
| -5 | 6  | 2  | 18.96 | 1.54 |
| -5 | -6 | 2  | 16.45 | 1.58 |
| 5  | -6 | -2 | 17.34 | 1.38 |
| 7  | 3  | -1 | 7.02  | 0.61 |
| -7 | 3  | 1  | 3.54  | 0.87 |
| 7  | -3 | -1 | 6.03  | 0.62 |
| -7 | -3 | 1  | 6.31  | 0.87 |
| -5 | 2  | 6  | 0.32  | 1.14 |
| -5 | -2 | 6  | 0.61  | 1.01 |
| 5  | -2 | -6 | 1.44  | 0.99 |
| 5  | 2  | -6 | -1.67 | 1.04 |
| 2  | 7  | 4  | 13.58 | 1.01 |
| -2 | -7 | -4 | 17.38 | 1.57 |
| 2  | 0  | -8 | 17.22 | 1.41 |
| -2 | 0  | 8  | 14.12 | 1.11 |
| 0  | 2  | 8  | 12.87 | 1.19 |
| 2  | -7 | 4  | 14.98 | 1.46 |
| -2 | 7  | -4 | 16.28 | 1.19 |
| 0  | -2 | -8 | 11.40 | 0.90 |
| -5 | 0  | -6 | 0.88  | 0.96 |
| 5  | 0  | 6  | -1.80 | 0.93 |
| 0  | -2 | 8  | 12.70 | 1.18 |
| 0  | 2  | -8 | 14.40 | 1.16 |
| 2  | -4 | -7 | 14.60 | 1.12 |
| -6 | -5 | -1 | 56.91 | 2.24 |
| 6  | 5  | 1  | 49.21 | 2.01 |
| -2 | 4  | 7  | 14.30 | 1.19 |
| -6 | 5  | -1 | 50.59 | 2.21 |
| 6  | -5 | 1  | 58.53 | 2.09 |
| -4 | 6  | 4  | 0.01  | 1.21 |
| 2  | 4  | -7 | 18.22 | 1.58 |
| 4  | -6 | -4 | 0.99  | 1.01 |

|    |    |    |        |      |
|----|----|----|--------|------|
| -2 | -4 | 7  | 16.76  | 1.28 |
| -5 | 5  | 4  | 59.78  | 2.44 |
| 5  | 5  | -4 | 69.30  | 2.31 |
| 4  | 6  | -4 | -0.91  | 1.08 |
| -5 | -5 | 4  | 64.64  | 2.48 |
| -4 | -6 | 4  | -1.69  | 1.23 |
| 5  | -5 | -4 | 68.00  | 2.25 |
| 5  | -4 | -5 | 5.25   | 0.71 |
| -6 | -4 | -3 | 0.74   | 1.00 |
| -5 | 4  | 5  | 5.56   | 0.94 |
| 6  | 4  | 3  | 1.21   | 0.87 |
| 5  | 4  | -5 | 5.11   | 0.68 |
| -5 | -4 | 5  | 4.61   | 0.96 |
| -6 | 4  | -3 | 0.75   | 0.92 |
| 6  | -4 | 3  | -0.22  | 0.92 |
| -7 | -3 | -1 | 4.27   | 0.81 |
| 7  | -3 | 1  | 3.57   | 0.57 |
| -7 | 3  | -1 | 3.71   | 0.77 |
| 7  | 3  | 1  | 3.57   | 0.59 |
| 1  | -2 | -8 | 14.04  | 1.27 |
| -1 | 2  | 8  | 15.73  | 1.47 |
| 5  | 6  | 2  | 36.31  | 1.69 |
| -5 | -6 | -2 | 36.62  | 2.13 |
| -1 | -2 | 8  | 17.30  | 1.44 |
| 1  | 2  | -8 | 15.08  | 1.28 |
| -4 | 4  | 6  | -0.07  | 1.16 |
| 4  | -4 | -6 | -0.42  | 1.01 |
| 5  | -6 | 2  | 38.64  | 1.86 |
| -5 | 6  | -2 | 36.35  | 2.00 |
| 2  | -1 | -8 | 86.39  | 2.47 |
| -2 | 1  | 8  | 93.06  | 2.88 |
| -4 | -4 | 6  | -1.73  | 1.27 |
| 4  | 4  | -6 | -0.46  | 1.01 |
| -2 | -1 | 8  | 104.81 | 3.10 |
| 2  | 1  | -8 | 96.59  | 2.66 |
| 3  | -6 | -5 | 28.35  | 1.93 |
| 5  | 1  | 6  | 2.52   | 0.56 |
| 5  | -1 | 6  | 3.30   | 0.55 |
| -5 | -1 | -6 | 5.68   | 0.85 |
| -3 | 6  | 5  | 27.87  | 2.19 |
| -5 | 1  | -6 | 6.12   | 0.89 |
| 3  | 6  | -5 | 32.04  | 1.90 |
| 7  | 0  | 3  | 28.25  | 1.59 |
| -7 | 0  | -3 | 33.17  | 1.86 |
| -3 | -6 | 5  | 28.71  | 2.28 |
| -4 | -7 | 2  | 66.43  | 2.56 |
| 4  | 7  | -2 | 68.96  | 2.31 |
| -4 | 7  | 2  | 61.22  | 2.64 |
| 4  | -7 | -2 | 65.61  | 2.37 |
| -6 | -3 | -4 | 1.33   | 1.06 |
| 6  | 3  | 4  | -0.79  | 0.93 |
| 4  | 5  | 5  | 51.75  | 2.03 |
| -4 | -5 | -5 | 90.72  | 2.89 |
| -2 | -8 | 2  | 25.58  | 2.00 |
| 6  | -3 | 4  | 2.07   | 0.51 |
| -2 | 8  | 2  | 25.92  | 1.96 |
| 2  | -8 | -2 | 29.13  | 1.87 |
| 2  | 8  | -2 | 30.18  | 1.75 |

|    |    |    |        |      |
|----|----|----|--------|------|
| -6 | 3  | -4 | 1.93   | 0.69 |
| -4 | 5  | -5 | 83.10  | 2.79 |
| 3  | -5 | -6 | 5.55   | 0.83 |
| 4  | -5 | 5  | 63.92  | 2.31 |
| -3 | 5  | 6  | 7.32   | 1.04 |
| 3  | 5  | -6 | 4.20   | 0.76 |
| -3 | -5 | 6  | 5.46   | 1.02 |
| 1  | 2  | 8  | 27.25  | 1.58 |
| -1 | -2 | -8 | 35.02  | 1.95 |
| 0  | -8 | -3 | 1.83   | 0.68 |
| 0  | 8  | 3  | 3.09   | 0.66 |
| -2 | -8 | -2 | 2.61   | 0.86 |
| 1  | -2 | 8  | 30.55  | 1.67 |
| 2  | 8  | 2  | 3.09   | 0.62 |
| -1 | 2  | -8 | 36.88  | 2.03 |
| -3 | -3 | -7 | 23.04  | 1.86 |
| 0  | 8  | -3 | 1.69   | 1.15 |
| -6 | -2 | 5  | 25.32  | 1.82 |
| 3  | 3  | 7  | 16.09  | 1.38 |
| 6  | 2  | -5 | 26.47  | 1.65 |
| 0  | -8 | 3  | -0.27  | 1.16 |
| -6 | 2  | 5  | 24.08  | 1.86 |
| 6  | -2 | -5 | 26.92  | 1.64 |
| -2 | 8  | -2 | 3.80   | 0.92 |
| 2  | -8 | 2  | 2.98   | 0.63 |
| -6 | 5  | 2  | 4.74   | 0.84 |
| 3  | -3 | 7  | 19.64  | 1.49 |
| -3 | 3  | -7 | 24.04  | 1.86 |
| 7  | -1 | 3  | 68.78  | 2.24 |
| 6  | 5  | -2 | 3.61   | 0.68 |
| -7 | 1  | -3 | 77.55  | 2.69 |
| -6 | -5 | 2  | 3.89   | 0.89 |
| -7 | 2  | 3  | 18.49  | 1.61 |
| -7 | -1 | -3 | 82.39  | 2.67 |
| -7 | -2 | 3  | 17.56  | 1.56 |
| 6  | -5 | -2 | 5.29   | 0.66 |
| 7  | -2 | -3 | 18.58  | 1.42 |
| 7  | 1  | 3  | 65.55  | 2.25 |
| 7  | 2  | -3 | 16.38  | 1.43 |
| -2 | -4 | -7 | 104.12 | 3.01 |
| 2  | 4  | 7  | 77.63  | 2.32 |
| 2  | 0  | 8  | 41.14  | 1.78 |
| -2 | 0  | -8 | 52.42  | 2.20 |
| -4 | 2  | 7  | 20.60  | 1.66 |
| 6  | 0  | 5  | -0.86  | 0.97 |
| -2 | 4  | -7 | 107.95 | 3.08 |
| 4  | -2 | -7 | 15.49  | 1.02 |
| 2  | -4 | 7  | 92.56  | 2.60 |
| -6 | 0  | -5 | -0.51  | 1.10 |
| 7  | 3  | -2 | 35.83  | 1.73 |
| -7 | -3 | 2  | 33.91  | 1.91 |
| 4  | 0  | 7  | 0.41   | 0.86 |
| -4 | -7 | -2 | 3.66   | 0.91 |
| -7 | 3  | 2  | 37.28  | 2.00 |
| 7  | -3 | -2 | 37.27  | 1.78 |
| 4  | 2  | -7 | 16.08  | 1.50 |
| -4 | -2 | 7  | 19.61  | 1.68 |
| 4  | 7  | 2  | 2.73   | 0.66 |

|    |    |    |       |      |
|----|----|----|-------|------|
| -4 | 0  | -7 | 0.60  | 0.88 |
| 4  | -7 | 2  | 3.13  | 0.64 |
| 0  | 6  | 6  | 1.87  | 0.53 |
| -4 | 7  | -2 | 1.86  | 1.27 |
| 0  | -6 | -6 | 1.85  | 0.54 |
| 0  | 6  | -6 | -0.33 | 1.05 |
| 0  | -6 | 6  | 0.90  | 0.97 |
| 4  | 6  | 4  | 2.41  | 0.61 |
| -4 | -6 | -4 | 3.76  | 0.90 |
| -4 | 6  | -4 | 3.69  | 0.88 |
| 4  | -6 | 4  | 3.28  | 0.63 |
| -1 | 8  | 3  | 71.43 | 2.92 |
| 1  | -8 | -3 | 76.42 | 2.70 |
| 1  | 8  | -3 | 75.75 | 2.59 |
| -1 | -8 | 3  | 69.78 | 2.82 |
| -5 | -5 | -4 | 75.37 | 2.67 |
| -3 | -6 | -5 | 23.37 | 1.80 |
| 3  | 6  | 5  | 20.13 | 1.46 |
| 5  | 5  | 4  | 33.73 | 1.68 |
| 2  | 1  | 8  | 9.49  | 0.82 |
| -2 | -1 | -8 | 10.82 | 1.04 |
| -1 | 6  | 6  | 2.26  | 0.91 |
| 1  | -6 | -6 | 2.63  | 0.69 |
| 2  | -1 | 8  | 11.57 | 0.83 |
| -2 | 1  | -8 | 11.59 | 1.08 |
| 3  | -6 | 5  | 18.75 | 1.53 |
| 6  | -1 | 5  | 1.59  | 0.54 |
| -5 | 5  | -4 | 76.43 | 2.69 |
| -6 | 1  | -5 | 0.91  | 1.16 |
| 6  | 1  | 5  | 0.94  | 0.87 |
| -3 | 6  | -5 | 23.63 | 1.69 |
| 5  | -5 | 4  | 59.47 | 2.23 |
| -6 | -1 | -5 | 3.21  | 0.75 |
| -1 | -6 | 6  | 3.84  | 0.89 |
| -4 | 1  | -7 | 16.44 | 1.09 |
| 1  | 6  | -6 | 3.81  | 0.67 |
| 4  | -1 | 7  | 10.65 | 0.80 |
| -1 | -8 | -3 | -0.17 | 1.24 |
| -4 | -1 | -7 | 18.42 | 1.55 |
| 4  | 1  | 7  | 8.36  | 0.79 |
| 1  | 8  | 3  | -0.69 | 1.02 |
| -1 | 8  | -3 | -0.45 | 1.27 |
| 1  | -8 | 3  | -1.27 | 1.08 |
| 3  | 8  | 0  | 2.42  | 0.62 |
| 0  | 7  | 5  | 0.35  | 1.02 |
| 6  | 5  | 2  | 17.63 | 1.43 |
| 0  | -7 | -5 | 0.89  | 1.01 |
| 3  | -8 | 0  | 1.34  | 1.20 |
| 6  | -5 | 2  | 21.58 | 1.50 |
| 0  | -7 | 5  | -1.63 | 1.12 |
| 0  | 7  | -5 | -0.35 | 1.02 |
| 2  | -2 | -8 | -1.78 | 1.03 |
| 2  | 2  | -8 | 0.94  | 0.57 |
| 3  | 5  | 6  | 34.37 | 1.67 |
| 5  | 2  | 6  | -0.05 | 0.89 |
| 5  | 4  | 5  | 1.45  | 0.54 |
| 1  | 6  | 6  | 4.73  | 0.67 |
| 5  | -2 | 6  | 0.06  | 0.86 |

|   |    |    |       |      |
|---|----|----|-------|------|
| 5 | -4 | 5  | 2.03  | 0.57 |
| 3 | -5 | 6  | 36.05 | 1.80 |
| 1 | -6 | 6  | 6.68  | 0.68 |
| 4 | 4  | 6  | 1.62  | 0.56 |
| 7 | 3  | 2  | 30.26 | 1.70 |
| 5 | -6 | -3 | 16.55 | 1.46 |
| 7 | -3 | 2  | 31.12 | 1.76 |
| 5 | 6  | -3 | 16.21 | 1.42 |
| 4 | -4 | 6  | 2.17  | 0.61 |
| 3 | 8  | -1 | 7.65  | 0.75 |
| 3 | -8 | -1 | 7.42  | 0.78 |
| 1 | -7 | -5 | 35.46 | 2.03 |
| 5 | -3 | -6 | 49.55 | 1.98 |
| 5 | 3  | -6 | 45.46 | 1.91 |
| 3 | -7 | -4 | 1.86  | 0.70 |
| 1 | 7  | -5 | 35.46 | 2.02 |
| 3 | 7  | -4 | 0.59  | 1.20 |
| 6 | -4 | -4 | 2.71  | 0.70 |
| 6 | 4  | -4 | 3.47  | 0.66 |
| 3 | 8  | 1  | 32.20 | 1.87 |
| 7 | 0  | -4 | 0.78  | 0.78 |
| 0 | -3 | -8 | 1.40  | 0.55 |
| 0 | 3  | 8  | 0.70  | 0.91 |
| 3 | -8 | 1  | 32.68 | 1.85 |
| 7 | 2  | 3  | 4.10  | 0.60 |
| 0 | -3 | 8  | 2.59  | 0.51 |
| 0 | 3  | -8 | 2.54  | 0.52 |
| 7 | -2 | 3  | 3.82  | 0.62 |
| 0 | -5 | -7 | 25.61 | 1.53 |
| 0 | 5  | 7  | 27.23 | 1.53 |
| 0 | 5  | -7 | 22.40 | 1.56 |
| 0 | -5 | 7  | 22.57 | 1.59 |
| 1 | 7  | 5  | 23.78 | 1.66 |
| 1 | -7 | 5  | 24.60 | 1.75 |
| 3 | 0  | -8 | 0.97  | 1.14 |
| 1 | -3 | -8 | 37.71 | 1.82 |
| 1 | 3  | -8 | 41.23 | 1.86 |
| 1 | -5 | -7 | 4.76  | 0.67 |
| 7 | -1 | -4 | -0.76 | 1.08 |
| 7 | 1  | -4 | 0.78  | 1.03 |
| 3 | -4 | -7 | 2.25  | 0.78 |
| 1 | 5  | -7 | 6.15  | 0.70 |
| 7 | 4  | 0  | 1.02  | 0.95 |
| 3 | 4  | -7 | 0.92  | 0.73 |
| 7 | -4 | 0  | 0.55  | 0.96 |
| 4 | 7  | -3 | 3.30  | 0.67 |
| 2 | 2  | 8  | 23.59 | 1.48 |
| 4 | -7 | -3 | 2.36  | 0.68 |
| 2 | -2 | 8  | 21.21 | 1.54 |
| 6 | 2  | 5  | 5.76  | 0.61 |
| 6 | -2 | 5  | 5.49  | 0.62 |
| 4 | 2  | 7  | 0.18  | 0.93 |
| 4 | -2 | 7  | 0.48  | 0.92 |
| 5 | 6  | 3  | 3.81  | 0.69 |
| 3 | 7  | 4  | 1.63  | 0.60 |
| 2 | -8 | -3 | 6.73  | 0.85 |
| 5 | -6 | 3  | 7.67  | 0.71 |
| 2 | 8  | -3 | 7.82  | 0.77 |



|   |    |    |       |      |
|---|----|----|-------|------|
| 2 | -6 | -6 | 28.58 | 2.04 |
| 3 | -7 | 4  | 0.85  | 1.03 |
| 7 | 4  | -1 | 0.54  | 0.98 |
| 7 | -4 | -1 | 0.67  | 1.01 |
| 3 | 1  | -8 | -0.24 | 1.16 |
| 3 | -1 | -8 | 0.50  | 0.98 |
| 2 | 6  | -6 | 29.62 | 1.99 |
| 1 | 3  | 8  | 0.94  | 0.99 |
| 6 | -5 | -3 | 0.06  | 1.15 |
| 1 | -3 | 8  | 2.35  | 0.55 |
| 1 | 5  | 7  | 0.54  | 1.00 |
| 6 | -3 | -5 | 60.68 | 2.17 |
| 6 | 5  | -3 | -0.62 | 1.06 |
| 6 | 3  | -5 | 60.82 | 2.24 |
| 1 | -5 | 7  | 0.32  | 1.00 |
| 7 | -3 | -3 | 2.21  | 0.61 |
| 7 | 3  | -3 | 2.35  | 0.60 |
| 4 | -3 | -7 | 5.94  | 0.70 |
| 2 | 8  | 3  | 0.14  | 1.00 |
| 4 | 3  | -7 | 7.33  | 0.75 |
| 2 | -8 | 3  | -0.22 | 1.10 |
| 3 | 8  | -2 | 6.71  | 0.77 |
| 3 | -8 | -2 | 5.95  | 0.84 |
| 7 | 4  | 1  | -1.69 | 0.89 |
| 7 | -4 | 1  | -1.16 | 1.03 |
| 4 | 7  | 3  | 10.82 | 0.94 |
| 4 | -7 | 3  | 13.34 | 1.31 |
| 2 | -7 | -5 | -2.24 | 1.34 |
| 2 | 7  | -5 | 1.00  | 0.79 |
| 2 | 6  | 6  | 25.66 | 1.74 |
| 6 | 4  | 4  | 2.66  | 0.56 |
| 3 | 8  | 2  | 1.46  | 0.61 |
| 6 | -4 | 4  | 3.61  | 0.59 |
| 2 | -6 | 6  | 31.56 | 1.69 |
| 3 | -8 | 2  | 1.13  | 0.76 |
| 5 | 7  | 0  | 0.32  | 1.10 |
| 2 | -3 | -8 | 3.05  | 0.66 |
| 5 | -7 | 0  | 1.03  | 0.98 |
| 8 | 0  | 0  | 14.98 | 1.29 |
| 7 | 0  | 4  | -1.47 | 1.08 |
| 3 | 4  | 7  | -1.27 | 1.00 |
| 7 | -2 | -4 | 37.39 | 1.92 |
| 7 | 2  | -4 | 34.26 | 1.79 |
| 2 | 3  | -8 | 4.72  | 0.68 |
| 5 | 3  | 6  | 23.74 | 1.48 |
| 3 | -4 | 7  | -1.07 | 1.05 |
| 3 | 0  | 8  | -1.53 | 0.99 |
| 5 | 0  | -7 | 34.08 | 1.74 |
| 5 | -3 | 6  | 33.28 | 1.74 |
| 6 | 0  | -6 | 17.21 | 1.59 |
| 2 | -5 | -7 | 50.86 | 2.29 |
| 2 | 5  | -7 | 51.11 | 2.49 |
| 0 | -8 | -4 | 6.32  | 0.78 |
| 7 | 4  | -2 | 29.52 | 1.71 |
| 0 | 8  | 4  | 5.27  | 0.80 |
| 7 | -4 | -2 | 30.88 | 1.76 |
| 0 | -8 | 4  | 6.40  | 0.78 |
| 0 | 8  | -4 | 6.74  | 0.80 |

|   |    |    |       |      |
|---|----|----|-------|------|
| 0 | 9  | 0  | -0.65 | 1.13 |
| 0 | -9 | 0  | -0.15 | 1.05 |
| 8 | 0  | -1 | -0.49 | 0.88 |
| 4 | -6 | -5 | 1.07  | 1.21 |
| 6 | 5  | 3  | 22.16 | 1.45 |
| 5 | -5 | -5 | 10.74 | 1.02 |
| 5 | 5  | -5 | 13.42 | 1.00 |
| 2 | 7  | 5  | 0.52  | 1.01 |
| 4 | 6  | -5 | -0.44 | 1.19 |
| 5 | 7  | -1 | 0.98  | 0.75 |
| 5 | -7 | -1 | -0.79 | 1.09 |
| 6 | -5 | 3  | 30.12 | 1.67 |
| 3 | -2 | -8 | 15.48 | 1.52 |
| 2 | -7 | 5  | 1.17  | 1.05 |
| 6 | 6  | 0  | 19.92 | 1.51 |
| 3 | 2  | -8 | 16.74 | 1.20 |
| 6 | -6 | 0  | 20.37 | 1.45 |
| 4 | -5 | -6 | 18.75 | 1.58 |
| 4 | 5  | -6 | 17.10 | 1.21 |
| 8 | -1 | 0  | 32.43 | 1.76 |
| 8 | 1  | 0  | 29.83 | 1.76 |
| 7 | -1 | 4  | 0.00  | 0.91 |
| 7 | 1  | 4  | -0.06 | 0.96 |
| 7 | 3  | 3  | 0.31  | 0.99 |
| 3 | 1  | 8  | 11.58 | 0.92 |
| 3 | -1 | 8  | 14.34 | 1.40 |
| 5 | 1  | -7 | 66.25 | 2.32 |
| 5 | -1 | -7 | 72.68 | 2.34 |
| 7 | -3 | 3  | 1.11  | 1.02 |
| 6 | 1  | -6 | 80.40 | 2.49 |
| 6 | -1 | -6 | 82.02 | 2.58 |
| 5 | 7  | 1  | 16.20 | 1.52 |
| 1 | -8 | -4 | 0.91  | 1.18 |
| 6 | -6 | -1 | 5.37  | 0.68 |
| 1 | 8  | -4 | -2.07 | 1.34 |
| 6 | 6  | -1 | 6.46  | 0.66 |
| 5 | -7 | 1  | 20.80 | 1.57 |
| 8 | -1 | -1 | 24.30 | 1.57 |
| 8 | 1  | -1 | 18.92 | 1.58 |
| 0 | -9 | -1 | -0.29 | 1.13 |
| 0 | -9 | 1  | -1.03 | 1.10 |
| 0 | 9  | -1 | 0.07  | 1.10 |
| 0 | 9  | 1  | 0.07  | 1.14 |
| 8 | 0  | 1  | -3.46 | 1.08 |
| 1 | -9 | 0  | 3.06  | 0.72 |
| 1 | 9  | 0  | 2.66  | 0.68 |
| 1 | 8  | 4  | 0.14  | 1.10 |
| 1 | -8 | 4  | 0.60  | 1.16 |
| 6 | 6  | 1  | 4.74  | 0.65 |
| 2 | 5  | 7  | 6.14  | 0.68 |
| 2 | 3  | 8  | 4.34  | 0.64 |
| 6 | -6 | 1  | 5.43  | 0.68 |
| 7 | 4  | 2  | 18.74 | 1.50 |
| 2 | -3 | 8  | 3.76  | 0.65 |
| 6 | 3  | 5  | 16.27 | 1.39 |
| 5 | -6 | -4 | 3.13  | 0.66 |
| 4 | 3  | 7  | 45.65 | 2.00 |
| 2 | -5 | 7  | 7.60  | 0.70 |

|   |    |    |       |      |
|---|----|----|-------|------|
| 6 | -3 | 5  | 18.87 | 1.39 |
| 5 | 6  | -4 | 1.15  | 1.25 |
| 7 | -4 | 2  | 20.72 | 1.48 |
| 4 | -3 | 7  | 55.61 | 2.24 |
| 8 | 1  | 1  | 13.75 | 1.02 |
| 8 | -1 | 1  | 13.51 | 1.01 |
| 1 | -9 | -1 | 14.24 | 1.11 |
| 1 | 9  | -1 | 14.32 | 1.37 |
| 5 | -4 | -6 | 2.59  | 0.64 |
| 1 | 9  | 1  | 8.46  | 0.80 |
| 5 | 4  | -6 | 1.91  | 0.67 |
| 1 | -9 | 1  | 10.52 | 0.94 |
| 0 | -4 | -8 | 1.10  | 1.10 |
| 0 | 4  | 8  | 1.85  | 0.56 |
| 8 | 0  | -2 | 5.65  | 0.63 |
| 0 | 4  | -8 | 2.76  | 0.56 |
| 0 | -4 | 8  | -1.01 | 1.11 |
| 4 | 6  | 5  | -0.07 | 1.08 |
| 5 | -7 | -2 | 0.67  | 1.05 |
| 5 | 7  | -2 | 0.26  | 1.07 |
| 3 | -6 | -6 | 13.30 | 1.25 |
| 4 | -6 | 5  | 1.09  | 0.75 |
| 3 | 6  | -6 | 17.05 | 1.61 |
| 4 | 8  | 0  | 43.96 | 2.08 |
| 4 | -8 | 0  | 43.57 | 2.17 |
| 3 | -8 | -3 | 11.64 | 0.95 |
| 3 | 8  | -3 | 12.18 | 1.17 |
| 1 | -4 | -8 | 5.02  | 0.63 |
| 1 | 4  | -8 | 4.41  | 0.66 |
| 7 | 2  | 4  | 18.40 | 1.49 |
| 8 | 2  | 0  | 16.35 | 1.38 |
| 8 | -2 | 0  | 12.78 | 1.03 |
| 8 | 1  | -2 | 24.22 | 1.59 |
| 5 | 5  | 5  | 16.63 | 1.45 |
| 8 | -1 | -2 | 25.28 | 1.66 |
| 7 | -2 | 4  | 20.43 | 1.53 |
| 6 | 6  | -2 | 17.16 | 1.61 |
| 3 | 2  | 8  | 0.68  | 1.03 |
| 5 | -2 | -7 | 14.17 | 1.39 |
| 6 | -6 | -2 | 17.80 | 1.51 |
| 3 | -2 | 8  | 0.24  | 0.95 |
| 6 | 2  | -6 | 3.99  | 0.71 |
| 5 | 2  | -7 | 14.34 | 1.37 |
| 6 | -2 | -6 | 4.78  | 0.73 |
| 5 | -5 | 5  | 30.42 | 1.82 |
| 4 | 5  | 6  | 0.30  | 1.10 |
| 4 | -7 | -4 | 47.90 | 2.28 |
| 4 | 8  | -1 | 2.17  | 0.64 |
| 4 | -8 | -1 | 2.96  | 0.70 |
| 4 | 7  | -4 | 44.85 | 2.32 |
| 4 | -5 | 6  | 2.23  | 0.64 |
| 8 | -2 | -1 | 0.31  | 0.95 |
| 8 | 2  | -1 | 0.89  | 0.58 |
| 0 | 9  | 2  | 1.28  | 1.08 |
| 0 | -9 | -2 | 2.32  | 0.70 |
| 0 | 9  | -2 | 0.89  | 1.22 |
| 0 | -9 | 2  | 1.34  | 1.15 |
| 2 | -8 | -4 | 66.02 | 2.66 |

|   |    |    |        |      |
|---|----|----|--------|------|
| 5 | 7  | 2  | 9.16   | 0.75 |
| 2 | 8  | -4 | 64.48  | 2.64 |
| 1 | 4  | 8  | 47.55  | 2.00 |
| 3 | 8  | 3  | 24.28  | 1.71 |
| 4 | 8  | 1  | 0.48   | 0.99 |
| 6 | 5  | -4 | 2.59   | 0.62 |
| 5 | -7 | 2  | 9.68   | 0.92 |
| 4 | 0  | -8 | 82.22  | 2.70 |
| 6 | -5 | -4 | 0.71   | 1.20 |
| 7 | -3 | -4 | 1.32   | 0.61 |
| 1 | -4 | 8  | 59.42  | 2.25 |
| 6 | -4 | -5 | 44.43  | 1.97 |
| 4 | -8 | 1  | 0.35   | 1.08 |
| 7 | 3  | -4 | 1.20   | 1.08 |
| 0 | 0  | 9  | -0.89  | 1.06 |
| 0 | 0  | -9 | 0.24   | 1.04 |
| 3 | -8 | 3  | 26.39  | 1.75 |
| 6 | 4  | -5 | 48.59  | 2.13 |
| 7 | 0  | -5 | 148.02 | 3.35 |
| 3 | -7 | -5 | 20.77  | 1.90 |
| 7 | 4  | -3 | 3.40   | 0.60 |
| 7 | -4 | -3 | 2.72   | 0.65 |
| 3 | 7  | -5 | 21.83  | 1.80 |
| 5 | 6  | 4  | -0.39  | 1.09 |
| 5 | 0  | 7  | 8.22   | 0.81 |
| 4 | -4 | -7 | 19.79  | 1.65 |
| 5 | -6 | 4  | -0.01  | 1.10 |
| 8 | 0  | 2  | 65.46  | 2.33 |
| 6 | 0  | 6  | 42.94  | 2.03 |
| 4 | 4  | -7 | 23.19  | 1.79 |
| 2 | 9  | 0  | 18.82  | 1.55 |
| 2 | -9 | 0  | 14.78  | 1.18 |
| 8 | 2  | 1  | 73.61  | 2.47 |
| 8 | -2 | 1  | 74.35  | 2.52 |
| 3 | -3 | -8 | 6.91   | 0.77 |
| 1 | 0  | -9 | 15.22  | 1.01 |
| 3 | 3  | -8 | 4.04   | 0.80 |
| 1 | -9 | -2 | -0.09  | 1.26 |
| 6 | 6  | 2  | 5.86   | 0.67 |
| 1 | 9  | -2 | -2.27  | 1.33 |
| 6 | -6 | 2  | 5.03   | 0.74 |
| 2 | 8  | 4  | 22.98  | 1.81 |
| 4 | 1  | -8 | 7.17   | 0.76 |
| 4 | -1 | -8 | 5.47   | 0.77 |
| 3 | -5 | -7 | 3.35   | 0.87 |
| 0 | 1  | 9  | 1.97   | 0.57 |
| 3 | 6  | 6  | 4.76   | 0.63 |
| 0 | -1 | -9 | 2.86   | 0.59 |
| 7 | -1 | -5 | 1.70   | 1.21 |
| 7 | 1  | -5 | 1.49   | 0.69 |
| 7 | 5  | 0  | 34.34  | 1.88 |
| 0 | 1  | -9 | 2.19   | 0.59 |
| 2 | -8 | 4  | 26.51  | 1.93 |
| 0 | -1 | 9  | 1.58   | 1.10 |
| 1 | 9  | 2  | 10.45  | 1.02 |
| 7 | -5 | 0  | 36.68  | 1.93 |
| 1 | -9 | 2  | 9.31   | 0.83 |
| 3 | 5  | -7 | 3.57   | 0.76 |

|   |    |    |       |      |
|---|----|----|-------|------|
| 5 | 1  | 7  | 7.81  | 0.67 |
| 3 | -6 | 6  | 4.33  | 0.63 |
| 5 | -1 | 7  | 9.08  | 0.86 |
| 8 | 1  | 2  | 30.94 | 1.74 |
| 6 | -1 | 6  | 6.93  | 0.68 |
| 6 | 1  | 6  | 8.76  | 0.69 |
| 2 | 9  | -1 | 18.55 | 1.28 |
| 2 | -9 | -1 | 19.88 | 1.77 |
| 8 | -1 | 2  | 28.93 | 1.81 |
| 0 | 7  | 6  | 30.84 | 1.81 |
| 0 | -7 | -6 | 30.44 | 1.82 |
| 0 | 7  | -6 | 33.22 | 1.87 |
| 0 | -7 | 6  | 32.80 | 1.87 |
| 4 | 7  | 4  | 15.03 | 1.06 |
| 7 | 5  | -1 | 8.80  | 0.85 |
| 1 | -1 | -9 | 44.50 | 1.98 |
| 2 | 9  | 1  | 18.49 | 1.57 |
| 1 | 1  | -9 | 46.64 | 2.01 |
| 4 | -7 | 4  | 21.28 | 1.60 |
| 7 | -5 | -1 | 8.18  | 0.78 |
| 2 | -9 | 1  | 17.46 | 1.67 |
| 2 | -4 | -8 | 6.60  | 0.74 |
| 1 | 0  | 9  | 60.82 | 2.29 |
| 2 | 4  | -8 | 8.06  | 0.76 |
| 8 | -2 | -2 | 1.26  | 0.61 |
| 8 | 2  | -2 | 1.21  | 1.03 |
| 5 | 4  | 6  | 0.78  | 0.71 |
| 5 | -4 | 6  | 2.21  | 0.56 |
| 0 | 6  | 7  | -0.08 | 1.07 |
| 0 | -6 | -7 | 0.52  | 1.05 |
| 4 | -8 | -2 | 3.64  | 0.81 |
| 4 | 8  | -2 | 5.49  | 0.76 |
| 3 | 7  | 5  | 2.17  | 0.65 |
| 1 | -7 | -6 | 3.28  | 0.77 |
| 0 | 6  | -7 | -3.53 | 1.26 |
| 0 | -6 | 7  | -0.09 | 1.08 |
| 3 | -7 | 5  | 2.32  | 0.66 |
| 1 | 7  | -6 | 3.24  | 0.68 |
| 7 | 5  | 1  | 7.94  | 0.72 |
| 7 | -5 | 1  | 9.14  | 0.89 |
| 8 | 0  | -3 | -2.07 | 1.01 |
| 1 | 1  | 9  | 2.86  | 0.64 |
| 1 | -6 | -7 | 1.44  | 0.63 |
| 1 | -1 | 9  | 3.72  | 0.63 |
| 7 | 4  | 3  | 1.49  | 0.65 |
| 1 | 6  | -7 | 1.48  | 1.13 |
| 1 | 7  | 6  | 1.50  | 1.06 |
| 7 | -4 | 3  | 3.14  | 0.64 |
| 1 | -7 | 6  | -0.02 | 1.20 |
| 5 | -7 | -3 | 17.87 | 1.60 |
| 4 | 8  | 2  | 29.04 | 1.86 |
| 6 | 5  | 4  | 17.94 | 1.53 |
| 5 | 7  | -3 | 17.73 | 1.58 |
| 4 | -8 | 2  | 32.07 | 1.91 |
| 6 | -5 | 4  | 24.73 | 1.70 |
| 8 | -1 | -3 | 3.92  | 0.65 |
| 8 | 1  | -3 | 5.22  | 0.67 |
| 2 | 0  | -9 | -0.14 | 0.94 |

|   |    |    |        |      |
|---|----|----|--------|------|
| 4 | -2 | -8 | 17.70  | 1.62 |
| 1 | 6  | 7  | 21.02  | 1.54 |
| 4 | 2  | -8 | 21.43  | 1.78 |
| 8 | 3  | 0  | 21.28  | 1.69 |
| 6 | 6  | -3 | 39.74  | 2.01 |
| 7 | 3  | 4  | 1.37   | 0.57 |
| 3 | 5  | 7  | -1.38  | 1.06 |
| 6 | -6 | -3 | 38.11  | 1.93 |
| 0 | -2 | -9 | 15.51  | 1.51 |
| 8 | -3 | 0  | 20.04  | 1.68 |
| 7 | -2 | -5 | 55.19  | 2.25 |
| 7 | 2  | -5 | 51.40  | 2.15 |
| 0 | 2  | 9  | 15.74  | 1.38 |
| 3 | 3  | 8  | 51.08  | 2.19 |
| 1 | -6 | 7  | 21.21  | 1.68 |
| 0 | -2 | 9  | 20.31  | 1.50 |
| 0 | 2  | -9 | 18.89  | 1.37 |
| 7 | -3 | 4  | 1.36   | 0.99 |
| 5 | -3 | -7 | 0.05   | 1.07 |
| 3 | -5 | 7  | 0.72   | 1.01 |
| 2 | 4  | 8  | -0.08  | 1.05 |
| 5 | 3  | -7 | 1.33   | 1.04 |
| 5 | 2  | 7  | 1.00   | 0.60 |
| 6 | -3 | -6 | 9.11   | 0.81 |
| 3 | -3 | 8  | 53.22  | 2.22 |
| 5 | -2 | 7  | 2.61   | 0.60 |
| 6 | 3  | -6 | 8.84   | 0.79 |
| 6 | 4  | 5  | 4.08   | 0.64 |
| 6 | 2  | 6  | 10.79  | 0.95 |
| 7 | 5  | -2 | 18.27  | 1.47 |
| 2 | -4 | 8  | 0.70   | 0.61 |
| 4 | 4  | 7  | 2.70   | 0.63 |
| 8 | 2  | 2  | 47.90  | 2.16 |
| 7 | -5 | -2 | 17.45  | 1.54 |
| 8 | -2 | 2  | 45.78  | 2.13 |
| 6 | -2 | 6  | 11.62  | 0.92 |
| 6 | -4 | 5  | 4.83   | 0.68 |
| 2 | -9 | -2 | 27.86  | 2.07 |
| 2 | 9  | -2 | 24.79  | 1.97 |
| 8 | 3  | -1 | 76.64  | 2.55 |
| 4 | -4 | 7  | 3.34   | 0.66 |
| 4 | 0  | 8  | 4.16   | 0.58 |
| 8 | -3 | -1 | 79.02  | 2.53 |
| 1 | -2 | -9 | 12.03  | 0.93 |
| 1 | 2  | -9 | 12.69  | 0.93 |
| 2 | -1 | -9 | 1.45   | 1.14 |
| 0 | -8 | -5 | -0.68  | 1.28 |
| 2 | 1  | -9 | 3.20   | 0.68 |
| 0 | 8  | 5  | 1.05   | 0.66 |
| 0 | 9  | 3  | 2.81   | 0.76 |
| 0 | 8  | -5 | 0.89   | 1.27 |
| 0 | -8 | 5  | 0.49   | 1.16 |
| 0 | -9 | -3 | 3.55   | 0.78 |
| 2 | 9  | 2  | 12.26  | 1.01 |
| 0 | 9  | -3 | 0.87   | 1.35 |
| 0 | -9 | 3  | 3.12   | 0.78 |
| 7 | 0  | 5  | 102.06 | 2.92 |
| 2 | -9 | 2  | 8.89   | 0.85 |

|   |    |    |       |      |
|---|----|----|-------|------|
| 5 | 7  | 3  | 33.56 | 1.87 |
| 4 | -1 | 8  | 8.41  | 0.69 |
| 4 | 1  | 8  | 7.44  | 0.69 |
| 8 | 3  | 1  | 55.53 | 2.16 |
| 5 | -7 | 3  | 49.65 | 2.28 |
| 8 | -3 | 1  | 53.26 | 2.24 |
| 2 | -7 | -6 | 8.12  | 0.93 |
| 1 | -8 | -5 | 18.92 | 1.80 |
| 2 | 7  | -6 | 8.67  | 0.83 |
| 3 | -8 | -4 | 12.80 | 1.21 |
| 1 | 8  | -5 | 18.85 | 1.79 |
| 3 | 8  | -4 | 13.64 | 1.22 |
| 1 | 2  | 9  | 18.82 | 1.53 |
| 1 | -2 | 9  | 25.11 | 1.65 |
| 1 | -9 | -3 | 0.26  | 1.29 |
| 1 | 9  | -3 | 0.56  | 1.24 |
| 7 | -1 | 5  | 2.04  | 0.67 |
| 7 | 1  | 5  | -0.11 | 1.20 |
| 2 | -6 | -7 | 18.20 | 1.27 |
| 8 | 0  | 3  | 1.11  | 0.74 |
| 7 | 5  | 2  | 36.47 | 1.98 |
| 2 | 6  | -7 | 19.14 | 1.28 |
| 1 | 9  | 3  | 22.78 | 1.78 |
| 7 | -5 | 2  | 38.48 | 2.03 |
| 2 | 0  | 9  | 0.74  | 0.95 |
| 1 | 8  | 5  | 20.65 | 1.74 |
| 1 | -9 | 3  | 21.71 | 1.73 |
| 6 | 6  | 3  | 3.69  | 0.64 |
| 5 | -6 | -5 | 2.62  | 0.74 |
| 1 | -8 | 5  | 19.74 | 1.85 |
| 5 | 6  | -5 | 1.83  | 0.69 |
| 6 | -6 | 3  | 0.95  | 0.82 |
| 8 | -2 | -3 | 10.08 | 0.92 |
| 3 | 9  | 0  | 8.02  | 0.81 |
| 5 | -5 | -6 | 39.34 | 2.06 |
| 8 | 2  | -3 | 8.79  | 0.75 |
| 3 | -9 | 0  | 7.35  | 0.86 |
| 5 | 5  | -6 | 42.34 | 2.12 |
| 4 | -6 | -6 | 19.84 | 1.97 |
| 4 | 6  | -6 | 23.92 | 2.00 |
| 7 | 4  | -4 | 59.51 | 2.29 |
| 0 | -5 | -8 | 5.38  | 0.70 |
| 0 | 5  | 8  | 5.70  | 0.69 |
| 7 | -4 | -4 | 55.64 | 2.29 |
| 8 | 3  | -2 | 4.68  | 0.71 |
| 8 | -3 | -2 | 4.61  | 0.69 |
| 0 | 5  | -8 | 4.70  | 0.74 |
| 0 | -5 | 8  | 6.67  | 0.70 |
| 8 | 1  | 3  | 1.00  | 1.15 |
| 4 | 8  | -3 | 1.67  | 0.73 |
| 4 | -8 | -3 | -1.33 | 1.37 |
| 8 | -1 | 3  | 1.54  | 1.12 |
| 2 | 7  | 6  | -1.30 | 1.11 |
| 2 | 1  | 9  | 5.65  | 0.63 |
| 2 | -1 | 9  | 3.93  | 0.68 |
| 2 | -7 | 6  | 0.52  | 0.74 |
| 3 | 8  | 4  | 0.01  | 1.13 |
| 3 | -8 | 4  | 0.01  | 0.94 |

|   |    |    |       |      |
|---|----|----|-------|------|
| 3 | 9  | -1 | 40.37 | 2.24 |
| 3 | -9 | -1 | 35.97 | 2.14 |
| 3 | -4 | -8 | 9.23  | 0.99 |
| 3 | 4  | -8 | 10.09 | 0.89 |
| 1 | -5 | -8 | 26.24 | 1.85 |
| 2 | -2 | -9 | -0.45 | 1.17 |
| 2 | 2  | -9 | -2.05 | 1.18 |
| 1 | 5  | -8 | 27.74 | 1.88 |
| 3 | 9  | 1  | 9.32  | 0.85 |
| 3 | -9 | 1  | 8.54  | 0.91 |
| 2 | 6  | 7  | 9.49  | 0.89 |
| 2 | -6 | 7  | 9.48  | 0.80 |
| 4 | 2  | 8  | -0.06 | 1.08 |
| 4 | -2 | 8  | -0.13 | 0.99 |
| 4 | -7 | -5 | 11.97 | 1.18 |
| 6 | 0  | -7 | -2.78 | 1.27 |
| 4 | 7  | -5 | 14.30 | 1.11 |
| 6 | 7  | 0  | 15.22 | 1.10 |
| 6 | -7 | 0  | 19.35 | 1.57 |
| 1 | 5  | 8  | 0.54  | 1.07 |
| 4 | -3 | -8 | 1.36  | 1.28 |
| 4 | 8  | 3  | 1.15  | 1.07 |
| 6 | -5 | -5 | 28.92 | 1.84 |
| 4 | 3  | -8 | 1.72  | 1.23 |
| 0 | 3  | 9  | 0.80  | 0.93 |
| 4 | -8 | 3  | 1.23  | 0.58 |
| 7 | -3 | -5 | -0.80 | 1.21 |
| 6 | 5  | -5 | 30.20 | 1.95 |
| 7 | 3  | -5 | 0.72  | 0.78 |
| 0 | -3 | -9 | 1.91  | 0.55 |
| 1 | -5 | 8  | -0.21 | 1.02 |
| 7 | 2  | 5  | 25.69 | 1.80 |
| 0 | 3  | -9 | 0.83  | 0.97 |
| 7 | -2 | 5  | 24.96 | 1.77 |
| 0 | -3 | 9  | 0.28  | 0.98 |
| 2 | -8 | -5 | 0.93  | 1.26 |
| 7 | -5 | -3 | 10.89 | 0.99 |
| 7 | 5  | -3 | 10.27 | 1.01 |
| 5 | 3  | 7  | 1.62  | 1.17 |
| 5 | -3 | 7  | 4.59  | 0.66 |
| 2 | 8  | -5 | 1.62  | 1.29 |
| 4 | -5 | -7 | 24.91 | 1.97 |
| 6 | 3  | 6  | 3.10  | 0.64 |
| 6 | 7  | -1 | -0.20 | 1.08 |
| 8 | 3  | 2  | -0.87 | 1.17 |
| 4 | 5  | -7 | 26.86 | 1.93 |
| 8 | -3 | 2  | 0.28  | 0.84 |
| 6 | -3 | 6  | 4.09  | 0.67 |
| 6 | -7 | -1 | 2.02  | 0.62 |
| 3 | 0  | -9 | 19.39 | 1.70 |
| 2 | -9 | -3 | 8.11  | 0.94 |
| 6 | 1  | -7 | 9.37  | 0.86 |
| 6 | -1 | -7 | 8.88  | 0.87 |
| 8 | 0  | -4 | 7.25  | 0.97 |
| 1 | -3 | -9 | -1.85 | 1.06 |
| 2 | 9  | -3 | 5.03  | 0.93 |
| 1 | 3  | -9 | 0.87  | 0.98 |
| 5 | 8  | 0  | 1.18  | 1.11 |



|   |    |    |       |      |
|---|----|----|-------|------|
| 5 | -8 | 0  | 0.67  | 1.13 |
| 5 | 6  | 5  | 7.06  | 0.75 |
| 8 | 2  | 3  | 60.44 | 2.42 |
| 8 | -2 | 3  | 66.79 | 2.47 |
| 6 | 7  | 1  | -0.41 | 1.06 |
| 5 | -6 | 5  | 12.37 | 1.03 |
| 4 | 6  | 6  | 1.62  | 0.60 |
| 6 | -7 | 1  | -0.27 | 1.10 |
| 2 | 2  | 9  | 0.21  | 1.11 |
| 5 | -7 | -4 | 4.93  | 0.78 |
| 2 | 9  | 3  | 2.56  | 0.71 |
| 2 | -2 | 9  | 0.62  | 1.09 |
| 5 | 7  | -4 | 4.92  | 0.79 |
| 4 | -6 | 6  | 3.45  | 0.67 |
| 3 | 1  | -9 | 37.22 | 2.06 |
| 3 | -1 | -9 | 32.97 | 1.84 |
| 2 | -9 | 3  | 3.60  | 0.75 |
| 3 | -9 | -2 | 10.47 | 0.99 |
| 2 | 8  | 5  | -0.50 | 1.25 |
| 3 | 9  | -2 | 11.22 | 0.97 |
| 8 | 1  | -4 | 33.57 | 1.96 |
| 5 | -8 | -1 | 43.85 | 2.20 |
| 8 | -1 | -4 | 35.28 | 1.93 |
| 5 | 8  | -1 | 44.25 | 2.26 |
| 5 | 0  | -8 | -0.81 | 1.24 |
| 2 | -8 | 5  | -1.18 | 1.29 |
| 1 | 3  | 9  | 1.48  | 1.08 |
| 2 | -5 | -8 | 9.09  | 0.92 |
| 6 | 6  | -4 | 24.42 | 1.92 |
| 6 | -6 | -4 | 24.33 | 1.90 |
| 8 | 4  | 0  | -0.67 | 1.11 |
| 7 | 4  | 4  | 23.83 | 1.70 |
| 1 | -3 | 9  | 2.42  | 0.64 |
| 8 | -4 | 0  | -0.13 | 1.19 |
| 3 | 4  | 8  | -0.60 | 1.10 |
| 2 | 5  | -8 | 8.82  | 0.90 |
| 5 | 5  | 6  | 19.25 | 1.57 |
| 7 | -4 | 4  | 33.85 | 1.83 |
| 7 | 0  | -6 | -2.01 | 1.37 |
| 5 | -5 | 6  | 29.75 | 1.96 |
| 6 | -4 | -6 | 0.77  | 1.23 |
| 5 | -4 | -7 | 0.86  | 1.23 |
| 3 | -4 | 8  | -0.34 | 1.12 |
| 5 | 4  | -7 | 2.59  | 0.68 |
| 6 | 4  | -6 | 0.65  | 1.13 |
| 5 | 8  | 1  | 18.26 | 1.66 |
| 3 | 9  | 2  | 1.65  | 1.17 |
| 5 | -8 | 1  | 22.91 | 1.65 |
| 4 | 7  | 5  | 8.42  | 0.75 |
| 8 | 4  | -1 | -0.81 | 1.10 |
| 3 | -7 | -6 | 8.04  | 0.95 |
| 8 | -4 | -1 | 1.24  | 0.61 |
| 3 | -9 | 2  | 1.06  | 1.09 |
| 4 | -7 | 5  | 9.42  | 0.82 |
| 3 | 7  | -6 | 8.32  | 0.87 |
| 5 | -1 | -8 | 3.52  | 0.75 |
| 5 | 1  | -8 | 2.00  | 1.36 |
| 8 | -3 | -3 | 19.30 | 1.66 |

|   |    |    |       |      |
|---|----|----|-------|------|
| 8 | 3  | -3 | 21.34 | 1.62 |
| 3 | -6 | -7 | 38.28 | 2.52 |
| 7 | 5  | 3  | 9.33  | 0.80 |
| 7 | 6  | 0  | 0.64  | 0.99 |
| 3 | 6  | -7 | 35.97 | 2.26 |
| 6 | 7  | -2 | 0.74  | 1.10 |
| 7 | 1  | -6 | -0.88 | 1.30 |
| 7 | -1 | -6 | -1.42 | 1.33 |
| 6 | -7 | -2 | 0.80  | 1.15 |
| 7 | -6 | 0  | 1.00  | 0.98 |
| 7 | -5 | 3  | 13.24 | 1.05 |
| 0 | -9 | -4 | 28.37 | 2.06 |
| 0 | 9  | 4  | 26.90 | 1.92 |
| 0 | -9 | 4  | 24.15 | 1.91 |
| 0 | 9  | -4 | 21.84 | 1.87 |
| 6 | -2 | -7 | 2.19  | 0.71 |
| 6 | 2  | -7 | 1.26  | 1.09 |
| 8 | 4  | 1  | 42.86 | 2.07 |
| 7 | 6  | -1 | 1.13  | 0.99 |
| 8 | -4 | 1  | 40.52 | 2.12 |
| 7 | -6 | -1 | -0.43 | 1.13 |
| 2 | -3 | -9 | 13.78 | 1.03 |
| 2 | 3  | -9 | 17.36 | 1.63 |
| 2 | 5  | 8  | 1.58  | 0.62 |
| 5 | 7  | 4  | 7.43  | 0.78 |
| 6 | 5  | 5  | 10.21 | 0.99 |
| 1 | -9 | -4 | -0.84 | 1.41 |
| 3 | 0  | 9  | -0.48 | 0.97 |
| 4 | 5  | 7  | 14.03 | 1.05 |
| 5 | -7 | 4  | 11.87 | 1.07 |
| 2 | -5 | 8  | 1.50  | 0.61 |
| 6 | -5 | 5  | 13.20 | 1.08 |
| 5 | 8  | -2 | 3.10  | 0.76 |
| 3 | -2 | -9 | 4.45  | 0.74 |
| 1 | 9  | -4 | 0.57  | 0.76 |
| 5 | -8 | -2 | 2.49  | 0.73 |
| 3 | 2  | -9 | 5.75  | 0.88 |
| 4 | 3  | 8  | 8.44  | 0.77 |
| 4 | -5 | 7  | 20.76 | 1.66 |
| 8 | 2  | -4 | 7.45  | 0.73 |
| 8 | -2 | -4 | 7.38  | 0.78 |
| 4 | -3 | 8  | 7.02  | 0.81 |
| 7 | 6  | 1  | -0.63 | 0.97 |
| 7 | -6 | 1  | 0.22  | 1.04 |
| 6 | 7  | 2  | 47.93 | 2.28 |
| 1 | 9  | 4  | 7.56  | 0.92 |
| 6 | -7 | 2  | 57.70 | 2.46 |
| 7 | 3  | 5  | 0.63  | 1.08 |
| 1 | -9 | 4  | 7.77  | 0.90 |
| 3 | 7  | 6  | 3.04  | 0.69 |
| 8 | 4  | -2 | 4.28  | 0.71 |
| 8 | -4 | -2 | 4.19  | 0.70 |
| 7 | -3 | 5  | -0.35 | 1.03 |
| 3 | -7 | 6  | 0.82  | 1.28 |
| 8 | 0  | 4  | 94.34 | 2.95 |
| 6 | 6  | 4  | 8.70  | 0.79 |
| 4 | -8 | -4 | 7.83  | 0.91 |
| 3 | 1  | 9  | 12.04 | 0.94 |

|   |     |    |       |      |
|---|-----|----|-------|------|
| 3 | -1  | 9  | 11.88 | 0.99 |
| 4 | 8   | -4 | 10.89 | 1.09 |
| 0 | 10  | 0  | 8.26  | 0.84 |
| 6 | -6  | 4  | 11.36 | 0.98 |
| 0 | -10 | 0  | 8.40  | 0.83 |
| 6 | 0   | 7  | 1.25  | 1.01 |
| 5 | -2  | -8 | 3.55  | 0.73 |
| 5 | 2   | -8 | 1.73  | 1.19 |
| 5 | 8   | 2  | -0.15 | 1.14 |
| 5 | -8  | 2  | 0.86  | 0.80 |
| 3 | 6   | 7  | 2.41  | 0.65 |
| 3 | -8  | -5 | 35.60 | 2.38 |
| 7 | -2  | -6 | 18.33 | 1.62 |
| 7 | 2   | -6 | 16.51 | 1.52 |
| 8 | 1   | 4  | 4.12  | 0.73 |
| 0 | -7  | -7 | 2.31  | 0.71 |
| 0 | 7   | 7  | 2.82  | 0.75 |
| 3 | -6  | 7  | 3.62  | 0.63 |
| 8 | -1  | 4  | 4.06  | 0.72 |
| 8 | 3   | 3  | 1.12  | 0.84 |
| 3 | 8   | -5 | 36.90 | 2.21 |
| 8 | -3  | 3  | 0.28  | 0.78 |
| 7 | 6   | -2 | 0.58  | 1.12 |
| 2 | 3   | 9  | 24.96 | 1.76 |
| 0 | 7   | -7 | 1.66  | 1.21 |
| 0 | -7  | 7  | 3.81  | 0.73 |
| 7 | -6  | -2 | 1.02  | 1.17 |
| 2 | -3  | 9  | 29.07 | 1.82 |
| 0 | -10 | -1 | 11.95 | 1.06 |
| 0 | 10  | 1  | 12.20 | 1.06 |
| 0 | -10 | 1  | 13.61 | 1.15 |
| 4 | 9   | 0  | 2.53  | 0.72 |
| 6 | -1  | 7  | 0.91  | 1.15 |
| 0 | 10  | -1 | 10.79 | 0.90 |
| 6 | 1   | 7  | -0.63 | 1.16 |
| 4 | -9  | 0  | 3.08  | 0.76 |
| 3 | -9  | -3 | 32.79 | 2.20 |
| 3 | 9   | -3 | 36.76 | 2.24 |
| 1 | 10  | 0  | 5.39  | 0.79 |
| 1 | -10 | 0  | 6.03  | 0.80 |
| 4 | -4  | -8 | 0.51  | 1.57 |
| 1 | -7  | -7 | 19.57 | 1.79 |
| 4 | 4   | -8 | 1.26  | 1.38 |
| 7 | 5   | -4 | 1.81  | 1.26 |
| 0 | 4   | 9  | 19.68 | 1.54 |
| 7 | -5  | -4 | 2.06  | 0.76 |
| 0 | -4  | -9 | 20.75 | 1.58 |
| 7 | -4  | -5 | 0.92  | 1.16 |
| 1 | 7   | -7 | 20.86 | 1.78 |
| 7 | 4   | -5 | -0.43 | 1.23 |
| 0 | -4  | 9  | 20.42 | 1.62 |
| 0 | 4   | -9 | 19.49 | 1.63 |
| 5 | 4   | 7  | 3.41  | 0.67 |
| 5 | -4  | 7  | 4.73  | 0.67 |
| 4 | 9   | -1 | 1.23  | 1.31 |
| 8 | 4   | 2  | 7.37  | 0.82 |
| 6 | 4   | 6  | 5.76  | 0.67 |
| 5 | 0   | 8  | -1.20 | 0.98 |

|   |     |    |       |      |
|---|-----|----|-------|------|
| 9 | 0   | 0  | 0.73  | 0.68 |
| 4 | -9  | -1 | -2.77 | 1.43 |
| 8 | -4  | 2  | 8.52  | 0.79 |
| 6 | -4  | 6  | 5.19  | 0.70 |
| 0 | 8   | 6  | 5.10  | 0.84 |
| 0 | -8  | -6 | 6.28  | 0.81 |
| 4 | 8   | 4  | 3.14  | 0.69 |
| 3 | -5  | -8 | 6.51  | 0.90 |
| 0 | -8  | 6  | 6.87  | 0.84 |
| 1 | -4  | -9 | 0.70  | 1.03 |
| 0 | 8   | -6 | 5.21  | 0.84 |
| 1 | -10 | -1 | 4.79  | 0.77 |
| 4 | -8  | 4  | 4.73  | 0.73 |
| 1 | 10  | -1 | 3.87  | 0.76 |
| 3 | 5   | -8 | 3.92  | 0.83 |
| 1 | 4   | -9 | 0.63  | 1.11 |
| 9 | 0   | -1 | 95.03 | 2.93 |
| 2 | -9  | -4 | -0.77 | 1.51 |
| 1 | 10  | 1  | 1.79  | 0.71 |
| 1 | -10 | 1  | 1.63  | 0.73 |
| 4 | 9   | 1  | 0.87  | 1.08 |
| 3 | 9   | 3  | 2.31  | 0.72 |
| 1 | 7   | 7  | 0.22  | 1.23 |
| 2 | 9   | -4 | 1.67  | 0.71 |
| 6 | -7  | -3 | -0.45 | 1.30 |
| 3 | -9  | 3  | 1.49  | 1.30 |
| 6 | 7   | -3 | 0.76  | 1.11 |
| 4 | -9  | 1  | 1.22  | 1.17 |
| 1 | -7  | 7  | 1.22  | 1.31 |
| 3 | 8   | 5  | 18.32 | 1.63 |
| 7 | 0   | 6  | 0.21  | 1.15 |
| 1 | -8  | -6 | 1.12  | 1.29 |
| 3 | 2   | 9  | 3.52  | 0.64 |
| 7 | 6   | 2  | -0.65 | 1.16 |
| 3 | -8  | 5  | 18.82 | 1.81 |
| 9 | 1   | 0  | 11.81 | 1.03 |
| 3 | -2  | 9  | 3.61  | 0.68 |
| 1 | 8   | -6 | 0.42  | 1.16 |
| 7 | -6  | 2  | 1.25  | 1.08 |
| 5 | 1   | 8  | 0.91  | 1.12 |
| 9 | -1  | 0  | 10.63 | 0.97 |
| 6 | -3  | -7 | 27.55 | 1.92 |
| 5 | -1  | 8  | 1.32  | 0.59 |
| 6 | 3   | -7 | 29.68 | 1.81 |
| 4 | 0   | -9 | -0.91 | 1.44 |
| 5 | -6  | -6 | -0.49 | 1.42 |
| 9 | 1   | -1 | 32.81 | 1.97 |
| 9 | -1  | -1 | 31.88 | 2.03 |
| 5 | 6   | -6 | 1.49  | 1.15 |
| 2 | 9   | 4  | 17.94 | 1.23 |
| 1 | 4   | 9  | 0.34  | 0.99 |
| 0 | 6   | 8  | 16.46 | 1.54 |
| 0 | -6  | -8 | 16.46 | 1.13 |
| 1 | -4  | 9  | 1.16  | 1.06 |
| 1 | 8   | 6  | 3.91  | 0.81 |
| 9 | 0   | 1  | 97.63 | 3.01 |
| 2 | -9  | 4  | 18.26 | 1.78 |
| 8 | 2   | 4  | 34.83 | 2.01 |

|   |     |    |       |      |
|---|-----|----|-------|------|
| 7 | 1   | 6  | -2.22 | 1.27 |
| 8 | -2  | 4  | 35.70 | 2.03 |
| 7 | -1  | 6  | 1.63  | 1.17 |
| 0 | 6   | -8 | 15.49 | 1.12 |
| 0 | -6  | 8  | 13.85 | 1.20 |
| 5 | -8  | -3 | 10.54 | 0.94 |
| 1 | -8  | 6  | 3.56  | 0.88 |
| 5 | 8   | -3 | 11.80 | 1.13 |
| 3 | -3  | -9 | 0.85  | 0.69 |
| 3 | 3   | -9 | -0.47 | 1.37 |
| 8 | 0   | -5 | 0.06  | 1.18 |
| 6 | 2   | 7  | 16.83 | 1.48 |
| 4 | 1   | -9 | 1.13  | 1.34 |
| 8 | -3  | -4 | 0.56  | 1.20 |
| 8 | 3   | -4 | 0.92  | 1.19 |
| 4 | -1  | -9 | -0.79 | 1.32 |
| 6 | -2  | 7  | 17.27 | 1.61 |
| 0 | -10 | -2 | 11.05 | 1.02 |
| 0 | 10  | 2  | 8.57  | 0.89 |
| 0 | 10  | -2 | 10.58 | 1.00 |
| 0 | -10 | 2  | 9.02  | 0.86 |
| 1 | -6  | -8 | 1.45  | 1.19 |
| 8 | -4  | -3 | 4.69  | 0.73 |
| 8 | 4   | -3 | 5.10  | 0.71 |
| 1 | 6   | -8 | -0.09 | 1.23 |
| 9 | 1   | 1  | 1.56  | 1.22 |
| 9 | -1  | 1  | 0.75  | 0.83 |
| 2 | -7  | -7 | -0.73 | 1.54 |
| 4 | -9  | -2 | 23.09 | 1.79 |
| 4 | 9   | -2 | 29.16 | 2.00 |
| 9 | 0   | -2 | 0.92  | 1.19 |
| 2 | 7   | -7 | 1.66  | 0.78 |
| 5 | -7  | -5 | 15.17 | 1.12 |
| 8 | -1  | -5 | 4.06  | 0.75 |
| 6 | 7   | 3  | 0.50  | 1.23 |
| 2 | -10 | 0  | 4.44  | 0.85 |
| 2 | 10  | 0  | 4.72  | 0.79 |
| 8 | 1   | -5 | 3.27  | 0.71 |
| 5 | 7   | -5 | 15.51 | 1.19 |
| 6 | -7  | 3  | 0.74  | 1.32 |
| 5 | -3  | -8 | 13.77 | 1.10 |
| 5 | 3   | -8 | 14.45 | 1.16 |
| 2 | -4  | -9 | 1.24  | 1.25 |
| 1 | -10 | -2 | 10.07 | 0.90 |
| 1 | 10  | -2 | 7.74  | 0.89 |
| 1 | 6   | 8  | 7.58  | 0.76 |
| 2 | 4   | -9 | 2.28  | 0.73 |
| 4 | -7  | -6 | 9.41  | 0.99 |
| 8 | 5   | 0  | 0.93  | 1.05 |
| 4 | 7   | -6 | 9.41  | 0.97 |
| 6 | -6  | -5 | 25.02 | 1.86 |
| 7 | 5   | 4  | 4.02  | 0.77 |
| 8 | -5  | 0  | 1.61  | 1.10 |
| 6 | 6   | -5 | 27.06 | 1.91 |
| 1 | -6  | 8  | 7.51  | 0.81 |
| 3 | 5   | 8  | 11.30 | 0.84 |
| 1 | 10  | 2  | -0.26 | 1.14 |
| 7 | -5  | 4  | 3.71  | 0.78 |

|   |     |     |       |      |
|---|-----|-----|-------|------|
| 1 | -10 | 2   | -0.86 | 1.27 |
| 0 | 0   | -10 | 48.20 | 2.18 |
| 7 | 6   | -3  | 11.39 | 0.89 |
| 7 | 3   | -6  | -0.23 | 1.32 |
| 7 | -3  | -6  | 1.80  | 1.33 |
| 5 | -5  | -7  | 1.79  | 1.37 |
| 0 | 0   | 10  | 45.73 | 2.20 |
| 7 | -6  | -3  | 10.76 | 1.06 |
| 6 | -5  | -6  | 6.62  | 0.80 |
| 3 | -5  | 8   | 13.89 | 1.39 |
| 5 | 5   | -7  | 3.16  | 0.77 |
| 6 | 5   | -6  | 5.40  | 0.80 |
| 4 | -6  | -7  | 8.68  | 1.05 |
| 9 | 1   | -2  | 6.15  | 0.81 |
| 9 | -1  | -2  | 7.31  | 0.80 |
| 9 | 2   | 0   | 25.19 | 1.83 |
| 9 | -2  | 0   | 28.37 | 1.85 |
| 5 | 2   | 8   | 6.95  | 0.76 |
| 4 | 9   | 2   | 1.40  | 0.67 |
| 4 | 6   | -7  | 8.84  | 0.97 |
| 2 | -10 | -1  | 7.91  | 0.92 |
| 8 | 5   | -1  | 16.47 | 1.60 |
| 5 | 8   | 3   | -0.24 | 1.07 |
| 4 | 4   | 8   | 1.14  | 0.96 |
| 2 | 10  | -1  | 7.67  | 0.89 |
| 8 | -5  | -1  | 19.15 | 1.60 |
| 5 | -2  | 8   | 8.17  | 0.78 |
| 4 | -9  | 2   | -0.09 | 1.22 |
| 4 | -4  | 8   | 1.26  | 0.96 |
| 5 | -8  | 3   | 1.38  | 1.09 |
| 2 | -8  | -6  | 14.89 | 1.36 |
| 2 | 10  | 1   | 0.51  | 1.33 |
| 1 | 0   | -10 | -0.22 | 1.01 |
| 2 | -10 | 1   | 1.64  | 1.28 |
| 9 | 2   | -1  | 29.96 | 1.93 |
| 2 | 8   | -6  | 14.41 | 1.21 |
| 9 | -2  | -1  | 32.18 | 1.85 |
| 7 | 4   | 5   | 3.86  | 0.75 |
| 0 | -1  | -10 | -1.59 | 1.16 |
| 0 | 1   | 10  | 1.21  | 1.05 |
| 7 | 2   | 6   | 10.22 | 1.02 |
| 7 | -4  | 5   | 2.65  | 0.71 |
| 0 | 1   | -10 | 1.66  | 0.53 |
| 0 | -1  | 10  | 0.86  | 1.12 |
| 2 | 7   | 7   | 0.14  | 1.13 |
| 7 | -2  | 6   | 11.41 | 1.03 |
| 2 | -7  | 7   | 1.35  | 1.10 |
| 8 | 5   | 1   | 21.31 | 1.69 |
| 4 | -2  | -9  | 12.13 | 1.15 |
| 8 | -5  | 1   | 21.59 | 1.72 |
| 1 | -1  | -10 | 0.21  | 1.04 |
| 4 | 2   | -9  | 13.40 | 1.23 |
| 1 | 1   | -10 | 1.45  | 0.61 |
| 0 | -9  | -5  | 7.54  | 0.94 |
| 0 | 9   | 5   | 8.54  | 0.87 |
| 2 | -6  | -8  | 7.73  | 0.88 |
| 9 | 0   | 2   | 1.16  | 1.08 |
| 0 | -9  | 5   | 7.24  | 0.89 |

|   |     |     |       |      |
|---|-----|-----|-------|------|
| 0 | 9   | -5  | 8.27  | 0.86 |
| 2 | 6   | -8  | 5.89  | 0.88 |
| 5 | 6   | 6   | 1.75  | 1.20 |
| 9 | -2  | 1   | 66.08 | 2.53 |
| 1 | 0   | 10  | -0.59 | 1.31 |
| 9 | 2   | 1   | 64.94 | 2.56 |
| 5 | -6  | 6   | 3.35  | 0.71 |
| 8 | 4   | 3   | 61.92 | 2.58 |
| 3 | 3   | 9   | 2.97  | 0.72 |
| 8 | -4  | 3   | 60.40 | 2.58 |
| 2 | 4   | 9   | 1.03  | 0.64 |
| 2 | 8   | 6   | 39.20 | 2.17 |
| 3 | -3  | 9   | 3.40  | 0.74 |
| 2 | -4  | 9   | 1.62  | 0.68 |
| 8 | -2  | -5  | 6.33  | 0.82 |
| 2 | -8  | 6   | 43.86 | 2.35 |
| 8 | 2   | -5  | 6.61  | 0.74 |
| 1 | -9  | -5  | 22.39 | 1.96 |
| 3 | -9  | -4  | 1.50  | 1.60 |
| 4 | 0   | 9   | -0.96 | 0.98 |
| 1 | 9   | -5  | 19.05 | 1.34 |
| 3 | 9   | -4  | 0.06  | 1.44 |
| 9 | -1  | 2   | -0.83 | 1.24 |
| 9 | 1   | 2   | -0.83 | 1.21 |
| 8 | 5   | -2  | 11.86 | 1.10 |
| 7 | 6   | 3   | 1.46  | 1.29 |
| 5 | 7   | 5   | 12.61 | 1.10 |
| 8 | -5  | -2  | 12.15 | 1.12 |
| 1 | 1   | 10  | 0.20  | 1.14 |
| 1 | -1  | 10  | 1.76  | 0.68 |
| 8 | 3   | 4   | 10.98 | 0.83 |
| 7 | -6  | 3   | 6.28  | 0.79 |
| 4 | 7   | 6   | 8.88  | 0.81 |
| 8 | -3  | 4   | 10.87 | 0.98 |
| 5 | -7  | 5   | 20.06 | 1.76 |
| 9 | 2   | -2  | 0.79  | 1.11 |
| 9 | -2  | -2  | -1.79 | 1.31 |
| 2 | -10 | -2  | -0.29 | 1.46 |
| 1 | 9   | 5   | 20.10 | 1.92 |
| 2 | 10  | -2  | -0.45 | 1.45 |
| 4 | -7  | 6   | 12.73 | 1.08 |
| 6 | 3   | 7   | 4.28  | 0.70 |
| 4 | -8  | -5  | -2.28 | 1.43 |
| 1 | -9  | 5   | 23.96 | 2.01 |
| 6 | -3  | 7   | 4.86  | 0.73 |
| 4 | 8   | -5  | -1.18 | 1.29 |
| 6 | 8   | 0   | 14.40 | 1.25 |
| 2 | 0   | -10 | 14.59 | 1.07 |
| 6 | -8  | 0   | 14.52 | 1.15 |
| 4 | 1   | 9   | 1.38  | 1.08 |
| 4 | -1  | 9   | 2.78  | 0.62 |
| 2 | 10  | 2   | -0.02 | 1.24 |
| 6 | 7   | -4  | 3.11  | 0.77 |
| 6 | 0   | -8  | 11.16 | 1.02 |
| 6 | -7  | -4  | 3.54  | 0.78 |
| 0 | 10  | 3   | 2.82  | 0.81 |
| 0 | -10 | -3  | 4.86  | 0.81 |
| 9 | 0   | -3  | 8.55  | 0.85 |

|   |     |     |       |      |
|---|-----|-----|-------|------|
| 2 | -10 | 2   | 1.86  | 1.25 |
| 0 | -10 | 3   | 4.49  | 0.79 |
| 0 | 10  | -3  | 3.32  | 0.76 |
| 0 | -2  | -10 | 12.65 | 1.03 |
| 0 | 2   | 10  | 10.65 | 1.01 |
| 0 | -2  | 10  | 11.15 | 1.02 |
| 2 | 6   | 8   | 10.44 | 0.97 |
| 0 | 2   | -10 | 14.37 | 1.42 |
| 6 | 6   | 5   | 1.54  | 1.17 |
| 4 | -9  | -3  | 1.77  | 1.41 |
| 4 | 6   | 7   | 2.70  | 0.66 |
| 4 | 9   | -3  | 1.49  | 0.77 |
| 8 | 0   | 5   | -1.06 | 1.35 |
| 7 | 0   | -7  | 40.40 | 2.17 |
| 6 | 8   | -1  | 1.73  | 1.32 |
| 2 | -6  | 8   | 10.31 | 0.83 |
| 6 | -8  | -1  | 0.54  | 1.20 |
| 6 | -6  | 5   | -0.17 | 1.26 |
| 6 | -4  | -7  | -1.75 | 1.29 |
| 3 | 9   | 4   | 0.15  | 1.11 |
| 4 | -6  | 7   | 4.45  | 0.70 |
| 6 | 4   | -7  | -1.45 | 1.36 |
| 1 | -2  | -10 | 8.37  | 0.79 |
| 3 | -9  | 4   | 1.02  | 0.98 |
| 2 | -1  | -10 | 25.21 | 1.83 |
| 1 | 2   | -10 | 8.73  | 0.75 |
| 2 | 1   | -10 | 27.86 | 1.94 |
| 4 | -5  | -8  | 1.19  | 0.83 |
| 6 | 1   | -8  | 17.55 | 1.71 |
| 9 | -1  | -3  | 72.60 | 2.63 |
| 9 | 1   | -3  | 74.71 | 2.75 |
| 6 | -1  | -8  | 18.66 | 1.72 |
| 1 | -10 | -3  | 14.88 | 1.20 |
| 0 | 5   | 9   | 2.95  | 0.66 |
| 4 | 5   | -8  | 0.55  | 1.26 |
| 7 | -5  | -5  | 1.27  | 1.29 |
| 0 | -5  | -9  | -0.47 | 1.25 |
| 3 | -7  | -7  | -0.99 | 1.59 |
| 7 | 5   | -5  | -2.34 | 1.36 |
| 1 | 10  | -3  | 14.28 | 1.25 |
| 0 | 5   | -9  | 3.08  | 0.69 |
| 7 | 7   | 0   | 3.94  | 0.66 |
| 0 | -5  | 9   | 1.28  | 1.27 |
| 3 | 7   | -7  | -0.92 | 1.39 |
| 5 | 5   | 7   | -0.46 | 1.12 |
| 7 | -7  | 0   | 2.89  | 0.68 |
| 6 | 8   | 1   | 3.06  | 0.68 |
| 6 | 5   | 6   | -1.46 | 1.21 |
| 8 | -1  | 5   | 3.20  | 0.73 |
| 5 | -5  | 7   | 0.37  | 1.18 |
| 6 | -8  | 1   | -0.60 | 1.40 |
| 8 | 1   | 5   | 4.22  | 0.74 |
| 7 | -1  | -7  | 15.99 | 1.18 |
| 8 | 5   | 2   | 0.06  | 1.04 |
| 9 | 3   | 0   | 12.86 | 1.14 |
| 5 | -8  | -4  | 1.62  | 0.73 |
| 5 | 3   | 8   | 7.60  | 0.81 |
| 8 | -5  | 2   | 0.85  | 1.09 |



|   |     |    |       |      |
|---|-----|----|-------|------|
| 3 | -4  | -9 | -0.32 | 1.20 |
| 1 | 10  | 3  | -0.25 | 1.34 |
| 7 | 1   | -7 | 17.40 | 1.71 |
| 5 | 8   | -4 | 1.15  | 1.30 |
| 9 | -3  | 0  | 13.93 | 1.16 |
| 5 | -3  | 8  | 10.51 | 0.97 |
| 6 | -5  | 6  | -1.89 | 1.25 |
| 3 | 4   | -9 | -0.27 | 1.32 |
| 1 | -10 | 3  | 0.90  | 1.29 |
| 8 | 4   | -4 | 0.47  | 1.16 |
| 8 | -4  | -4 | -0.58 | 1.22 |
| 1 | -5  | -9 | 2.57  | 0.74 |
| 7 | 7   | -1 | 21.83 | 1.77 |
| 7 | -7  | -1 | 22.89 | 1.77 |
| 3 | 10  | 0  | 0.91  | 1.19 |
| 1 | 5   | -9 | 1.70  | 0.75 |
| 9 | 3   | -1 | 14.43 | 1.13 |
| 9 | -3  | -1 | 13.97 | 1.12 |
| 3 | -10 | 0  | -0.25 | 1.28 |
| 4 | 9   | 3  | -0.15 | 1.12 |
| 9 | 2   | 2  | 35.78 | 2.09 |
| 9 | -2  | 2  | 35.96 | 2.13 |
| 4 | -9  | 3  | -1.24 | 1.12 |
| 1 | 2   | 10 | 3.47  | 0.71 |
| 2 | -9  | -5 | -0.34 | 1.42 |
| 7 | 3   | 6  | 0.76  | 1.10 |
| 1 | -2  | 10 | 4.26  | 0.68 |
| 7 | -3  | 6  | -0.06 | 0.82 |
| 2 | 9   | -5 | -0.16 | 1.29 |
| 4 | 8   | 5  | 1.11  | 1.21 |
| 3 | -8  | -6 | 0.68  | 1.38 |
| 4 | -8  | 5  | 3.07  | 0.67 |
| 4 | -3  | -9 | -0.17 | 1.57 |
| 2 | 0   | 10 | 3.77  | 0.67 |
| 7 | 7   | 1  | 20.28 | 1.69 |
| 3 | -10 | -1 | -0.70 | 1.41 |
| 3 | 8   | -6 | -1.50 | 1.35 |
| 3 | 10  | -1 | -0.34 | 1.48 |
| 4 | 3   | -9 | 0.07  | 0.96 |
| 5 | -4  | -8 | 12.76 | 1.16 |
| 5 | 4   | -8 | 14.76 | 1.21 |
| 7 | -7  | 1  | 20.36 | 1.84 |
| 4 | 2   | 9  | 7.03  | 0.80 |
| 4 | -2  | 9  | 8.85  | 0.79 |
| 5 | 9   | 0  | 0.94  | 1.34 |
| 1 | 5   | 9  | 0.68  | 1.08 |
| 5 | -9  | 0  | -0.82 | 1.29 |
| 7 | -6  | -4 | 14.51 | 1.21 |
| 9 | 3   | 1  | 1.83  | 1.35 |
| 7 | 6   | -4 | 15.23 | 1.20 |
| 3 | 10  | 1  | 2.42  | 0.78 |
| 1 | -5  | 9  | -0.93 | 1.17 |
| 3 | -10 | 1  | 0.57  | 1.43 |
| 6 | -8  | -2 | 31.65 | 2.19 |
| 6 | 8   | -2 | 36.14 | 2.19 |
| 9 | -3  | 1  | 1.52  | 0.78 |
| 7 | -4  | -6 | 24.08 | 1.80 |
| 7 | 4   | -6 | 25.33 | 1.82 |

|   |     |     |       |      |
|---|-----|-----|-------|------|
| 6 | 7   | 4   | 23.12 | 1.85 |
| 6 | -7  | 4   | 28.95 | 2.03 |
| 8 | -3  | -5  | 7.01  | 0.79 |
| 2 | 9   | 5   | -0.65 | 1.29 |
| 8 | 3   | -5  | 6.93  | 0.76 |
| 2 | 1   | 10  | 19.41 | 1.70 |
| 5 | 9   | -1  | 0.65  | 0.85 |
| 2 | -1  | 10  | 23.65 | 1.72 |
| 5 | -9  | -1  | -0.28 | 0.96 |
| 3 | -6  | -8  | 6.51  | 1.03 |
| 2 | -2  | -10 | 2.75  | 0.68 |
| 2 | -9  | 5   | 0.02  | 1.30 |
| 2 | 2   | -10 | 2.47  | 0.69 |
| 3 | 6   | -8  | 4.30  | 0.86 |
| 8 | -5  | -3  | 16.71 | 1.20 |
| 8 | 5   | -3  | 18.76 | 1.60 |
| 9 | 0   | 3   | 29.06 | 1.84 |
| 9 | 2   | -3  | 1.14  | 1.10 |
| 6 | -2  | -8  | 1.30  | 0.88 |
| 6 | 2   | -8  | 0.87  | 1.28 |
| 9 | -2  | -3  | -0.74 | 1.15 |
| 3 | 7   | 7   | 4.89  | 0.76 |
| 3 | -7  | 7   | 6.68  | 0.75 |
| 5 | 8   | 4   | 0.12  | 0.76 |
| 8 | 2   | 5   | 1.52  | 1.34 |
| 5 | 0   | -9  | 37.11 | 2.14 |
| 5 | 9   | 1   | 13.69 | 1.23 |
| 9 | 3   | -2  | 31.17 | 1.96 |
| 8 | -2  | 5   | 3.10  | 0.72 |
| 7 | -2  | -7  | 12.85 | 1.12 |
| 7 | 7   | -2  | -2.29 | 1.30 |
| 9 | -3  | -2  | 27.12 | 2.00 |
| 5 | -8  | 4   | 1.38  | 1.04 |
| 7 | -7  | -2  | 1.58  | 1.17 |
| 5 | -9  | 1   | 14.91 | 1.22 |
| 7 | 2   | -7  | 10.47 | 0.92 |
| 2 | -10 | -3  | 16.10 | 1.25 |
| 2 | 10  | -3  | 15.85 | 1.26 |
| 2 | -5  | -9  | 23.58 | 2.07 |
| 6 | 8   | 2   | -1.57 | 1.21 |
| 9 | -1  | 3   | 15.12 | 1.08 |
| 9 | 1   | 3   | 13.95 | 1.16 |
| 2 | 5   | -9  | 31.53 | 2.14 |
| 6 | -8  | 2   | -1.60 | 1.28 |
| 3 | 8   | 6   | 0.44  | 0.83 |
| 0 | 3   | 10  | 0.97  | 1.08 |
| 0 | -3  | -10 | 1.00  | 0.73 |
| 0 | -3  | 10  | 0.78  | 0.90 |
| 0 | 3   | -10 | 0.78  | 1.01 |
| 5 | -1  | -9  | 1.39  | 0.72 |
| 3 | 4   | 9   | 1.74  | 0.76 |
| 3 | -8  | 6   | 1.10  | 0.69 |
| 5 | 1   | -9  | 1.07  | 1.36 |
| 3 | 0   | -10 | 0.97  | 1.04 |
| 2 | 10  | 3   | 13.02 | 1.19 |
| 3 | -4  | 9   | 4.52  | 0.72 |
| 4 | 5   | 8   | -0.29 | 1.07 |
| 2 | -10 | 3   | 13.94 | 1.22 |

|   |     |     |       |      |
|---|-----|-----|-------|------|
| 8 | 0   | -6  | 40.83 | 2.07 |
| 1 | -3  | -10 | 3.26  | 0.69 |
| 3 | 10  | -2  | 1.64  | 1.52 |
| 4 | -5  | 8   | 0.24  | 1.01 |
| 3 | -10 | -2  | 3.19  | 0.88 |
| 1 | 3   | -10 | 5.04  | 0.69 |
| 7 | 5   | 5   | -1.59 | 1.26 |
| 0 | 8   | 7   | 1.37  | 1.21 |
| 8 | 4   | 4   | -0.37 | 1.26 |
| 7 | -5  | 5   | 0.95  | 0.86 |
| 0 | -8  | -7  | 0.60  | 1.18 |
| 8 | -4  | 4   | 0.09  | 1.22 |
| 3 | 1   | -10 | 1.97  | 1.38 |
| 3 | -1  | -10 | 2.27  | 0.75 |
| 7 | 7   | 2   | 1.57  | 1.17 |
| 0 | -8  | 7   | 0.01  | 1.47 |
| 0 | 8   | -7  | 0.10  | 1.30 |
| 7 | -7  | 2   | 1.84  | 0.73 |
| 5 | -9  | -2  | -0.25 | 1.37 |
| 5 | 9   | -2  | 0.93  | 0.95 |
| 3 | 10  | 2   | 7.81  | 0.86 |
| 3 | -10 | 2   | 7.00  | 0.91 |
| 6 | 4   | 7   | 15.52 | 1.16 |
| 2 | 2   | 10  | 0.23  | 1.10 |
| 8 | 1   | -6  | 6.53  | 0.79 |
| 6 | -4  | 7   | 19.26 | 1.65 |
| 8 | -1  | -6  | 5.90  | 0.81 |
| 2 | -2  | 10  | -0.14 | 1.17 |
| 9 | 0   | -4  | 0.54  | 1.18 |
| 5 | -7  | -6  | 1.51  | 1.38 |
| 5 | 7   | -6  | 3.09  | 0.83 |
| 9 | 3   | 2   | 9.13  | 0.89 |
| 6 | 0   | 8   | 12.58 | 1.06 |
| 9 | -3  | 2   | 8.42  | 0.86 |
| 1 | -8  | -7  | 0.19  | 1.33 |
| 7 | 6   | 4   | 13.67 | 1.11 |
| 8 | 6   | 0   | 7.59  | 0.74 |
| 8 | -6  | 0   | 5.25  | 0.77 |
| 3 | 6   | 8   | -0.22 | 1.04 |
| 0 | -7  | -8  | 4.26  | 0.80 |
| 0 | 7   | 8   | 4.54  | 0.77 |
| 1 | 8   | -7  | -1.38 | 1.33 |
| 1 | 3   | 10  | 7.01  | 0.80 |
| 8 | 5   | 3   | 2.67  | 0.71 |
| 7 | -6  | 4   | 18.15 | 1.62 |
| 1 | -3  | 10  | 6.85  | 0.78 |
| 5 | -6  | -7  | 3.11  | 0.84 |
| 0 | -7  | 8   | 2.25  | 0.80 |
| 6 | -6  | -6  | 6.73  | 0.94 |
| 0 | 7   | -8  | 3.06  | 0.83 |
| 3 | -6  | 8   | -0.95 | 1.14 |
| 5 | 6   | -7  | 3.87  | 0.85 |
| 6 | 6   | -6  | 7.71  | 0.93 |
| 8 | -5  | 3   | 1.81  | 1.37 |
| 0 | 10  | 4   | 0.28  | 1.32 |
| 4 | -9  | -4  | 13.56 | 1.29 |
| 0 | -10 | -4  | -0.45 | 1.48 |
| 2 | 5   | 9   | 7.50  | 0.77 |

|   |     |     |       |      |
|---|-----|-----|-------|------|
| 4 | 9   | -4  | 14.10 | 1.23 |
| 8 | 6   | -1  | 1.15  | 0.86 |
| 0 | -10 | 4   | 0.72  | 0.88 |
| 7 | 0   | 7   | 13.53 | 1.13 |
| 0 | 10  | -4  | 0.99  | 1.29 |
| 2 | -5  | 9   | 10.50 | 0.97 |
| 8 | -6  | -1  | 0.49  | 1.17 |
| 9 | -1  | -4  | 0.63  | 1.36 |
| 1 | -7  | -8  | 1.55  | 1.45 |
| 9 | 1   | -4  | 0.01  | 1.31 |
| 4 | 3   | 9   | 8.74  | 0.82 |
| 5 | 9   | 2   | -1.57 | 1.28 |
| 9 | 2   | 3   | 22.19 | 1.83 |
| 6 | 1   | 8   | 0.55  | 1.10 |
| 4 | -3  | 9   | 8.14  | 0.85 |
| 6 | -1  | 8   | 1.39  | 1.10 |
| 1 | 7   | -8  | 0.76  | 1.36 |
| 9 | -2  | 3   | 20.67 | 1.85 |
| 5 | -9  | 2   | -1.78 | 1.28 |
| 1 | 8   | 7   | 23.83 | 2.06 |
| 6 | -8  | -3  | 1.01  | 1.16 |
| 6 | 8   | -3  | 1.63  | 1.21 |
| 1 | -8  | 7   | 28.69 | 2.27 |
| 3 | -9  | -5  | -2.35 | 1.48 |
| 3 | 9   | -5  | -3.28 | 1.52 |
| 1 | -10 | -4  | 4.87  | 0.87 |
| 5 | -2  | -9  | 7.38  | 0.85 |
| 5 | 2   | -9  | 8.45  | 0.90 |
| 9 | 4   | 0   | 51.78 | 2.46 |
| 5 | 4   | 8   | 9.01  | 0.85 |
| 7 | 1   | 7   | 12.16 | 0.97 |
| 1 | 10  | -4  | 5.39  | 0.81 |
| 9 | -4  | 0   | 49.53 | 2.41 |
| 7 | -1  | 7   | 11.60 | 1.16 |
| 5 | -4  | 8   | 13.48 | 1.11 |
| 8 | 6   | 1   | 3.63  | 0.68 |
| 8 | -6  | 1   | 4.54  | 0.71 |
| 2 | -3  | -10 | 1.48  | 0.63 |
| 9 | 4   | -1  | 1.71  | 0.67 |
| 2 | 3   | -10 | -2.16 | 1.27 |
| 1 | 7   | 8   | 2.84  | 0.70 |
| 1 | 10  | 4   | 3.99  | 0.84 |
| 9 | -4  | -1  | 0.56  | 1.36 |
| 6 | -3  | -8  | 2.19  | 0.75 |
| 9 | 3   | -3  | 6.76  | 0.75 |
| 9 | -3  | -3  | 5.71  | 0.80 |
| 6 | 3   | -8  | 1.56  | 1.19 |
| 1 | -10 | 4   | 3.69  | 0.85 |
| 6 | -7  | -5  | -0.99 | 1.35 |
| 6 | 7   | -5  | 2.01  | 1.34 |
| 1 | -7  | 8   | 2.01  | 1.34 |
| 7 | 7   | -3  | 11.00 | 1.09 |
| 7 | -7  | -3  | 7.57  | 0.87 |
| 7 | 4   | 6   | 21.45 | 1.81 |
| 7 | -4  | 6   | 23.71 | 1.84 |
| 8 | 3   | 5   | 11.12 | 1.06 |
| 3 | -2  | -10 | 3.05  | 0.66 |
| 3 | 2   | -10 | 2.23  | 0.78 |

|   |     |    |       |      |
|---|-----|----|-------|------|
| 8 | -3  | 5  | 10.73 | 0.86 |
| 4 | -7  | -7 | 3.50  | 0.93 |
| 7 | -3  | -7 | 1.88  | 1.27 |
| 7 | 3   | -7 | 0.57  | 1.29 |
| 4 | 7   | -7 | 5.33  | 0.86 |
| 0 | 9   | 6  | 11.51 | 0.96 |
| 0 | -9  | -6 | 12.12 | 1.20 |
| 6 | -5  | -7 | 19.18 | 1.83 |
| 8 | -2  | -6 | 13.00 | 1.05 |
| 4 | 9   | 4  | 1.61  | 0.65 |
| 6 | 5   | -7 | 18.87 | 1.43 |
| 4 | -4  | -9 | 19.39 | 1.48 |
| 0 | -9  | 6  | 11.35 | 1.01 |
| 0 | 9   | -6 | 11.52 | 1.00 |
| 3 | 0   | 10 | -1.01 | 1.11 |
| 8 | 2   | -6 | 9.59  | 0.88 |
| 4 | 4   | -9 | 22.56 | 1.92 |
| 4 | -9  | 4  | 1.54  | 0.68 |
| 8 | 6   | -2 | 0.24  | 1.09 |
| 9 | 4   | 1  | 6.14  | 0.81 |
| 8 | -6  | -2 | 1.05  | 1.32 |
| 9 | -4  | 1  | 6.11  | 0.81 |
| 3 | 9   | 5  | -0.25 | 1.30 |
| 2 | -8  | -7 | -1.46 | 1.50 |
| 1 | -9  | -6 | 2.09  | 1.47 |
| 2 | 8   | -7 | 1.68  | 1.15 |
| 3 | -9  | 5  | -1.61 | 1.27 |
| 3 | -5  | -9 | 6.59  | 0.94 |
| 1 | 9   | -6 | 2.23  | 0.72 |
| 6 | 8   | 3  | 5.00  | 0.79 |
| 8 | -4  | -5 | 8.75  | 0.88 |
| 5 | -8  | -5 | -1.74 | 1.38 |
| 3 | 5   | -9 | 5.94  | 0.94 |
| 8 | 4   | -5 | 9.60  | 0.82 |
| 3 | 1   | 10 | 0.00  | 1.20 |
| 5 | 8   | -5 | 0.09  | 1.16 |
| 8 | -5  | -4 | 11.24 | 0.92 |
| 4 | 10  | 0  | 2.62  | 0.82 |
| 3 | -10 | -3 | 3.57  | 0.89 |
| 6 | -8  | 3  | 5.73  | 0.77 |
| 3 | -1  | 10 | 0.47  | 1.08 |
| 8 | 5   | -4 | 10.80 | 0.91 |
| 4 | -10 | 0  | 1.84  | 0.88 |
| 9 | -2  | -4 | 0.86  | 1.12 |
| 3 | 10  | -3 | 3.92  | 0.91 |
| 9 | 2   | -4 | -0.70 | 1.26 |
| 5 | 0   | 9  | 4.98  | 0.73 |
| 6 | 2   | 8  | 6.50  | 0.84 |
| 2 | -7  | -8 | 10.77 | 1.04 |
| 4 | -8  | -6 | 12.32 | 1.10 |
| 6 | -2  | 8  | 8.98  | 0.82 |
| 5 | 7   | 6  | 0.00  | 1.21 |
| 4 | 8   | -6 | 13.22 | 1.25 |
| 2 | 7   | -8 | 12.03 | 1.20 |
| 1 | 9   | 6  | 1.95  | 0.80 |
| 5 | -7  | 6  | 0.41  | 1.22 |
| 9 | 4   | -2 | 8.93  | 0.79 |
| 1 | -9  | 6  | -0.48 | 1.55 |

|   |     |     |       |      |
|---|-----|-----|-------|------|
| 9 | -4  | -2  | 7.36  | 0.82 |
| 5 | 9   | -3  | 10.85 | 0.98 |
| 4 | -10 | -1  | 2.00  | 1.47 |
| 7 | 2   | 7   | 7.31  | 0.86 |
| 5 | -9  | -3  | 7.72  | 0.92 |
| 4 | 10  | -1  | 4.21  | 0.79 |
| 7 | -2  | 7   | 7.74  | 0.82 |
| 0 | 11  | 0   | 1.26  | 1.29 |
| 0 | -11 | 0   | -1.17 | 1.28 |
| 2 | 3   | 10  | -0.23 | 1.11 |
| 5 | -5  | -8  | 6.65  | 0.85 |
| 2 | -3  | 10  | -0.32 | 1.19 |
| 5 | 1   | 9   | 1.02  | 1.09 |
| 5 | 5   | -8  | 6.02  | 0.91 |
| 2 | -10 | -4  | 16.05 | 1.32 |
| 5 | -1  | 9   | 1.14  | 0.79 |
| 4 | -6  | -8  | 16.22 | 1.53 |
| 9 | 0   | 4   | 0.95  | 0.79 |
| 3 | 10  | 3   | 1.64  | 1.37 |
| 2 | 10  | -4  | 12.73 | 1.26 |
| 4 | 10  | 1   | 5.67  | 0.84 |
| 0 | 6   | 9   | 5.10  | 0.82 |
| 4 | 6   | -8  | 15.95 | 1.40 |
| 0 | -6  | -9  | 5.65  | 0.84 |
| 4 | -10 | 1   | 4.51  | 0.88 |
| 7 | -6  | -5  | 21.22 | 1.81 |
| 7 | 6   | -5  | 26.61 | 2.03 |
| 3 | -10 | 3   | 2.39  | 0.76 |
| 5 | 6   | 7   | 5.34  | 0.73 |
| 0 | -4  | -10 | 1.55  | 1.14 |
| 0 | 4   | 10  | -1.86 | 1.17 |
| 7 | -5  | -6  | 4.84  | 0.83 |
| 7 | 7   | 3   | 7.31  | 0.80 |
| 0 | -6  | 9   | 7.29  | 0.90 |
| 7 | 5   | -6  | 5.06  | 0.85 |
| 0 | 6   | -9  | 6.18  | 0.84 |
| 2 | 8   | 7   | -0.99 | 1.25 |
| 0 | 4   | -10 | -1.39 | 1.33 |
| 7 | -7  | 3   | 8.24  | 0.85 |
| 0 | -4  | 10  | 0.08  | 1.14 |
| 6 | 6   | 6   | 15.66 | 1.14 |
| 5 | -6  | 7   | 7.52  | 0.80 |
| 8 | 6   | 2   | 8.72  | 0.86 |
| 8 | -6  | 2   | 7.75  | 0.84 |
| 2 | -8  | 7   | -0.36 | 1.40 |
| 8 | 0   | 6   | 12.13 | 1.08 |
| 6 | -6  | 6   | 18.12 | 1.65 |
| 0 | -11 | -1  | 1.27  | 1.01 |
| 0 | 11  | 1   | 1.42  | 0.78 |
| 0 | 11  | -1  | 1.62  | 1.36 |
| 0 | -11 | 1   | 1.31  | 1.01 |
| 1 | -6  | -9  | 3.30  | 0.77 |
| 1 | -4  | -10 | 8.72  | 0.80 |
| 1 | 11  | 0   | 4.54  | 0.93 |
| 1 | 4   | -10 | 8.30  | 0.88 |
| 1 | -11 | 0   | 4.17  | 0.91 |
| 1 | 6   | -9  | 2.03  | 0.82 |
| 9 | 3   | 3   | 3.46  | 0.82 |

|   |     |     |       |      |
|---|-----|-----|-------|------|
| 2 | 10  | 4   | 2.79  | 0.80 |
| 9 | 1   | 4   | 7.00  | 0.78 |
| 9 | -3  | 3   | 2.90  | 0.76 |
| 9 | -1  | 4   | 6.39  | 0.79 |
| 2 | -10 | 4   | 1.53  | 1.46 |
| 2 | 7   | 8   | 7.00  | 0.76 |
| 4 | 7   | 7   | -1.04 | 1.09 |
| 6 | 7   | 5   | 0.97  | 0.88 |
| 5 | -3  | -9  | 0.90  | 1.35 |
| 5 | 3   | -9  | 1.23  | 1.33 |
| 4 | 0   | -10 | 17.59 | 1.44 |
| 2 | -7  | 8   | 6.33  | 0.81 |
| 8 | 1   | 6   | 28.56 | 1.93 |
| 5 | 9   | 3   | 5.20  | 0.76 |
| 6 | -7  | 5   | 0.08  | 1.29 |
| 8 | -1  | 6   | 30.35 | 1.95 |
| 4 | -7  | 7   | -0.25 | 1.20 |
| 3 | 2   | 10  | 5.77  | 0.78 |
| 2 | -9  | -6  | 8.98  | 1.00 |
| 5 | -9  | 3   | 4.39  | 0.79 |
| 3 | -2  | 10  | 6.83  | 0.77 |
| 1 | -11 | -1  | 0.27  | 1.37 |
| 1 | 11  | -1  | -0.82 | 1.29 |
| 2 | 9   | -6  | 9.53  | 0.96 |
| 1 | 11  | 1   | 0.00  | 1.26 |
| 1 | 6   | 9   | 13.04 | 1.08 |
| 9 | 4   | 2   | 34.93 | 2.12 |
| 1 | -11 | 1   | 0.64  | 1.33 |
| 9 | -4  | 2   | 32.57 | 2.13 |
| 1 | -6  | 9   | 13.50 | 1.18 |
| 1 | 4   | 10  | 6.38  | 0.76 |
| 5 | 8   | 5   | 0.08  | 1.21 |
| 1 | -4  | 10  | 7.35  | 0.82 |
| 5 | -8  | 5   | 0.00  | 1.12 |
| 4 | 8   | 6   | -0.49 | 1.32 |
| 3 | 5   | 9   | 0.71  | 1.19 |
| 3 | -3  | -10 | 10.11 | 0.88 |
| 4 | -10 | -2  | -2.24 | 1.43 |
| 4 | 10  | -2  | -1.43 | 1.20 |
| 4 | -1  | -10 | 4.33  | 1.02 |
| 3 | 3   | -10 | 10.56 | 1.00 |
| 4 | 1   | -10 | 4.81  | 0.95 |
| 3 | -5  | 9   | 2.88  | 0.66 |
| 4 | -8  | 6   | -1.29 | 1.29 |
| 8 | -3  | -6  | 0.00  | 1.27 |
| 8 | 3   | -6  | 1.53  | 1.06 |
| 4 | 4   | 9   | 9.34  | 0.84 |
| 5 | 2   | 9   | 2.52  | 0.70 |
| 8 | -6  | -3  | -0.91 | 1.25 |
| 8 | 6   | -3  | 0.66  | 1.21 |
| 5 | -2  | 9   | 3.81  | 0.71 |
| 4 | -4  | 9   | 13.66 | 1.13 |
| 6 | -8  | -4  | 13.23 | 1.16 |
| 6 | 8   | -4  | 14.73 | 1.23 |
| 8 | 5   | 4   | 0.31  | 1.18 |
| 8 | -5  | 4   | -1.32 | 1.27 |
| 2 | 9   | 6   | -2.81 | 1.49 |
| 4 | 10  | 2   | 0.63  | 1.23 |

|    |     |     |       |      |
|----|-----|-----|-------|------|
| 6  | 5   | 7   | -0.89 | 1.21 |
| 4  | -10 | 2   | 0.65  | 1.24 |
| 2  | -9  | 6   | 0.65  | 1.46 |
| 9  | 0   | -5  | 5.53  | 0.88 |
| 6  | -5  | 7   | -1.58 | 1.31 |
| 2  | -4  | -10 | -1.14 | 1.20 |
| 0  | -11 | -2  | 0.18  | 1.15 |
| 0  | 11  | 2   | 0.18  | 1.17 |
| 2  | -6  | -9  | 0.35  | 1.36 |
| 9  | 3   | -4  | 14.87 | 1.12 |
| 9  | -3  | -4  | 15.78 | 1.56 |
| 7  | 0   | -8  | -2.40 | 1.28 |
| 6  | 3   | 8   | -0.25 | 1.27 |
| 0  | 11  | -2  | -0.46 | 1.29 |
| 0  | -11 | 2   | -0.01 | 1.18 |
| 2  | 4   | -10 | 1.02  | 1.12 |
| 9  | 2   | 4   | 0.07  | 1.23 |
| 6  | -4  | -8  | -0.75 | 1.31 |
| 2  | 6   | -9  | -2.29 | 1.50 |
| 6  | -3  | 8   | 0.48  | 1.24 |
| 9  | -2  | 4   | 1.52  | 0.64 |
| 3  | -8  | -7  | 15.33 | 1.40 |
| 6  | 4   | -8  | 0.25  | 1.32 |
| 9  | 4   | -3  | 0.72  | 1.32 |
| 9  | -4  | -3  | 3.09  | 0.74 |
| 7  | 7   | -4  | 1.03  | 1.34 |
| 7  | -7  | -4  | 1.66  | 1.42 |
| 7  | 8   | 0   | 0.84  | 1.22 |
| 7  | -8  | 0   | 1.51  | 1.36 |
| 3  | 8   | -7  | 14.98 | 1.31 |
| 8  | 4   | 5   | 18.32 | 1.23 |
| 10 | 0   | 0   | 24.53 | 1.80 |
| 8  | -4  | 5   | 20.16 | 1.75 |
| 7  | -4  | -7  | -0.91 | 1.28 |
| 7  | 4   | -7  | -0.43 | 1.19 |
| 7  | 3   | 7   | 1.41  | 0.71 |
| 7  | -3  | 7   | 1.37  | 1.10 |
| 4  | 6   | 8   | 1.39  | 0.62 |
| 8  | 2   | 6   | 3.32  | 0.78 |
| 2  | -11 | 0   | -1.52 | 1.57 |
| 2  | 11  | 0   | -1.15 | 1.56 |
| 4  | -9  | -5  | -1.60 | 1.49 |
| 8  | -2  | 6   | 4.52  | 0.74 |
| 9  | -1  | -5  | 35.23 | 2.09 |
| 9  | 1   | -5  | 33.77 | 2.16 |
| 3  | -7  | -8  | 2.06  | 1.63 |
| 4  | -6  | 8   | 0.49  | 1.11 |
| 7  | 8   | -1  | 3.78  | 0.88 |
| 4  | 9   | -5  | -0.30 | 1.35 |
| 10 | 0   | -1  | -2.27 | 1.39 |
| 7  | -8  | -1  | 1.52  | 1.52 |
| 6  | 9   | 0   | 17.77 | 1.39 |
| 7  | -1  | -8  | 3.22  | 0.80 |
| 3  | 7   | -8  | 1.65  | 1.37 |
| 7  | 1   | -8  | 4.07  | 0.79 |
| 1  | -11 | -2  | -0.19 | 1.28 |
| 0  | -10 | -5  | -2.53 | 1.46 |
| 6  | -9  | 0   | 16.91 | 1.32 |



|    |     |     |       |      |
|----|-----|-----|-------|------|
| 1  | 11  | -2  | -0.10 | 1.23 |
| 0  | 10  | 5   | 1.16  | 1.21 |
| 7  | 6   | 5   | 12.06 | 0.98 |
| 0  | 10  | -5  | -1.42 | 1.26 |
| 0  | -10 | 5   | 0.37  | 1.34 |
| 1  | 11  | 2   | 14.13 | 1.22 |
| 1  | -11 | 2   | 14.20 | 1.25 |
| 7  | -6  | 5   | 14.40 | 1.22 |
| 10 | 1   | 0   | 6.55  | 0.84 |
| 10 | -1  | 0   | 7.28  | 0.85 |
| 5  | 5   | 8   | 3.03  | 0.72 |
| 6  | 9   | -1  | 1.60  | 1.47 |
| 4  | -2  | -10 | 6.83  | 0.81 |
| 9  | 5   | 0   | 1.17  | 0.92 |
| 2  | -11 | -1  | 9.37  | 1.06 |
| 2  | 11  | -1  | 13.25 | 1.24 |
| 6  | 0   | -9  | -0.42 | 1.30 |
| 6  | -9  | -1  | 3.42  | 0.83 |
| 9  | -5  | 0   | 1.47  | 1.32 |
| 4  | 2   | -10 | 7.74  | 0.99 |
| 5  | -5  | 8   | 4.83  | 0.77 |
| 10 | 1   | -1  | -1.71 | 1.25 |
| 7  | 8   | 1   | 1.65  | 0.69 |
| 10 | -1  | -1  | 0.86  | 0.70 |
| 2  | 11  | 1   | 26.28 | 2.21 |
| 1  | -10 | -5  | 1.35  | 1.50 |
| 7  | -8  | 1   | 3.35  | 0.72 |
| 2  | -11 | 1   | 23.06 | 2.19 |
| 9  | 5   | -1  | -1.98 | 1.38 |
| 9  | -5  | -1  | 0.24  | 1.25 |
| 3  | -10 | -4  | 6.84  | 0.89 |
| 1  | 10  | -5  | 3.55  | 0.79 |
| 3  | 10  | -4  | 6.43  | 0.93 |
| 10 | 0   | 1   | 0.81  | 1.24 |
| 7  | 5   | 6   | 5.82  | 0.83 |
| 8  | 6   | 3   | 15.55 | 1.24 |
| 6  | 9   | 1   | 6.92  | 0.94 |
| 7  | -5  | 6   | 4.58  | 0.88 |
| 2  | 6   | 9   | 1.54  | 1.23 |
| 0  | 0   | 11  | -1.79 | 1.29 |
| 6  | 8   | 4   | 2.81  | 0.75 |
| 0  | 0   | -11 | -1.46 | 1.28 |
| 6  | -9  | 1   | 6.89  | 0.88 |
| 8  | -6  | 3   | 16.29 | 1.29 |
| 5  | -9  | -4  | 1.83  | 1.48 |
| 6  | -1  | -9  | 5.14  | 0.89 |
| 1  | 10  | 5   | 4.08  | 0.86 |
| 5  | 9   | -4  | -0.30 | 1.35 |
| 6  | -8  | 4   | 3.58  | 0.72 |
| 2  | -6  | 9   | 3.14  | 0.73 |
| 6  | 1   | -9  | 5.25  | 0.84 |
| 2  | 4   | 10  | -0.81 | 1.24 |
| 3  | 3   | 10  | 4.24  | 0.71 |
| 4  | -5  | -9  | -2.34 | 1.75 |
| 1  | -10 | 5   | 2.24  | 0.88 |
| 3  | -3  | 10  | 3.57  | 0.75 |
| 2  | -4  | 10  | 1.25  | 1.19 |
| 4  | 5   | -9  | -0.94 | 1.56 |

|    |     |     |       |      |
|----|-----|-----|-------|------|
| 8  | 0   | -7  | -0.33 | 1.27 |
| 1  | 0   | -11 | 26.53 | 1.87 |
| 3  | 8   | 7   | 2.56  | 0.74 |
| 10 | 1   | 1   | 3.59  | 0.73 |
| 9  | 5   | 1   | -0.67 | 1.30 |
| 10 | 0   | -2  | 34.26 | 2.21 |
| 10 | -1  | 1   | 2.64  | 0.75 |
| 4  | 0   | 10  | 3.67  | 0.72 |
| 9  | -5  | 1   | 1.73  | 1.21 |
| 3  | -8  | 7   | 3.27  | 0.79 |
| 4  | 10  | -3  | -0.21 | 1.47 |
| 4  | -10 | -3  | 0.99  | 1.44 |
| 0  | 1   | 11  | 0.23  | 1.23 |
| 0  | -1  | -11 | -0.33 | 1.16 |
| 7  | 8   | -2  | 2.00  | 1.56 |
| 4  | 9   | 5   | 1.04  | 1.15 |
| 7  | -8  | -2  | 4.06  | 0.81 |
| 0  | 1   | -11 | -1.15 | 1.28 |
| 0  | -1  | 11  | -0.50 | 1.19 |
| 3  | -9  | -6  | 1.20  | 1.40 |
| 3  | 10  | 4   | 8.61  | 0.90 |
| 8  | -5  | -5  | 9.60  | 0.92 |
| 8  | 5   | -5  | 8.23  | 0.90 |
| 9  | -2  | -5  | 2.68  | 0.74 |
| 4  | -9  | 5   | 1.27  | 1.14 |
| 9  | 2   | -5  | 1.82  | 0.73 |
| 3  | 9   | -6  | -1.74 | 1.45 |
| 7  | -2  | -8  | 2.80  | 0.86 |
| 3  | -10 | 4   | 6.73  | 0.92 |
| 5  | 3   | 9   | 0.48  | 1.22 |
| 1  | -1  | -11 | 3.01  | 0.68 |
| 7  | 2   | -8  | 4.51  | 0.80 |
| 8  | 1   | -7  | -0.01 | 1.36 |
| 8  | -1  | -7  | 1.30  | 1.31 |
| 9  | 4   | 3   | 0.81  | 1.22 |
| 5  | -3  | 9   | 0.73  | 1.22 |
| 1  | 1   | -11 | 2.37  | 0.73 |
| 9  | -4  | 3   | 0.57  | 0.95 |
| 7  | 7   | 4   | 0.57  | 1.28 |
| 8  | 7   | 0   | 20.29 | 1.74 |
| 8  | -7  | 0   | 14.82 | 1.22 |
| 3  | 7   | 8   | -0.67 | 1.13 |
| 10 | 1   | -2  | 9.09  | 0.87 |
| 10 | -1  | -2  | 8.23  | 0.87 |
| 4  | 1   | 10  | 3.81  | 0.67 |
| 5  | -7  | -7  | 6.99  | 0.99 |
| 6  | 9   | -2  | -1.12 | 1.52 |
| 6  | -9  | -2  | -1.01 | 1.49 |
| 7  | -7  | 4   | 2.76  | 0.74 |
| 6  | -7  | -6  | 6.98  | 0.90 |
| 4  | -1  | 10  | 4.20  | 0.72 |
| 5  | -4  | -9  | -0.28 | 1.34 |
| 5  | 7   | -7  | 9.98  | 1.00 |
| 6  | 7   | -6  | 8.74  | 0.91 |
| 3  | -7  | 8   | 1.31  | 0.99 |
| 10 | 2   | 0   | 9.49  | 0.90 |
| 10 | -2  | 0   | 11.57 | 1.10 |
| 5  | 4   | -9  | 0.19  | 1.43 |

|    |     |     |       |      |
|----|-----|-----|-------|------|
| 9  | -5  | -2  | 21.60 | 1.91 |
| 9  | 5   | -2  | 21.66 | 1.82 |
| 1  | 0   | 11  | 6.55  | 0.86 |
| 8  | 7   | -1  | 1.27  | 0.85 |
| 2  | -11 | -2  | 0.65  | 1.45 |
| 6  | -6  | -7  | -0.71 | 1.35 |
| 8  | -7  | -1  | -1.38 | 1.23 |
| 2  | 11  | -2  | 1.88  | 1.34 |
| 6  | 6   | -7  | 1.21  | 1.40 |
| 10 | -2  | -1  | 15.23 | 1.23 |
| 10 | 2   | -1  | 15.33 | 1.19 |
| 9  | 3   | 4   | 13.91 | 1.19 |
| 4  | 10  | 3   | 5.44  | 0.81 |
| 9  | -3  | 4   | 13.82 | 1.12 |
| 2  | 11  | 2   | -0.12 | 1.44 |
| 0  | 11  | 3   | 4.97  | 0.88 |
| 0  | -11 | -3  | 6.92  | 0.87 |
| 4  | -10 | 3   | 5.55  | 0.86 |
| 0  | -5  | -10 | 0.39  | 1.17 |
| 0  | -11 | 3   | 6.97  | 0.87 |
| 0  | 5   | 10  | 0.72  | 1.18 |
| 0  | 11  | -3  | 6.84  | 0.84 |
| 2  | -11 | 2   | -1.00 | 1.53 |
| 2  | -10 | -5  | 7.83  | 1.00 |
| 5  | 9   | 4   | 0.68  | 1.27 |
| 0  | 5   | -10 | 1.22  | 1.21 |
| 3  | -4  | -10 | 0.94  | 1.42 |
| 0  | -5  | 10  | 0.70  | 1.09 |
| 2  | 10  | -5  | 7.14  | 0.93 |
| 7  | 8   | 2   | 1.17  | 1.41 |
| 3  | -6  | -9  | 4.54  | 1.02 |
| 1  | 1   | 11  | 14.83 | 1.20 |
| 5  | -9  | 4   | 3.17  | 0.72 |
| 3  | 4   | -10 | 2.59  | 0.86 |
| 1  | -1  | 11  | 17.18 | 1.67 |
| 7  | -8  | 2   | 2.88  | 0.77 |
| 6  | -2  | -9  | 0.64  | 1.51 |
| 8  | 3   | 6   | 3.93  | 0.78 |
| 8  | -3  | 6   | 5.18  | 0.76 |
| 6  | 2   | -9  | 1.92  | 0.84 |
| 3  | 6   | -9  | 3.60  | 0.93 |
| 8  | -4  | -6  | -0.52 | 1.39 |
| 1  | -5  | -10 | 1.58  | 1.44 |
| 8  | -6  | -4  | 6.41  | 0.90 |
| 8  | 7   | 1   | 1.93  | 0.75 |
| 8  | 6   | -4  | 7.28  | 0.91 |
| 8  | 4   | -6  | 0.57  | 1.24 |
| 8  | -7  | 1   | -0.02 | 1.35 |
| 6  | 9   | 2   | 9.01  | 0.91 |
| 2  | 0   | -11 | -1.27 | 1.26 |
| 5  | -8  | -6  | 1.57  | 0.79 |
| 1  | 5   | -10 | 7.22  | 0.84 |
| 5  | 8   | -6  | -0.73 | 1.54 |
| 5  | 10  | 0   | 3.59  | 0.82 |
| 5  | -10 | 0   | 3.26  | 0.87 |
| 1  | -11 | -3  | -2.45 | 1.41 |
| 6  | -9  | 2   | 8.51  | 0.92 |
| 10 | 0   | 2   | 2.25  | 0.93 |

|    |     |     |       |      |
|----|-----|-----|-------|------|
| 3  | 9   | 6   | 1.62  | 0.79 |
| 0  | -8  | -8  | 6.13  | 0.90 |
| 0  | 8   | 8   | 6.10  | 0.88 |
| 9  | 0   | 5   | 1.88  | 1.43 |
| 1  | 11  | -3  | 0.65  | 1.24 |
| 10 | 2   | 1   | 6.73  | 1.21 |
| 10 | -2  | 1   | 8.27  | 1.19 |
| 0  | 8   | -8  | 5.70  | 1.01 |
| 0  | -8  | 8   | 5.54  | 0.89 |
| 0  | 2   | 11  | 3.71  | 0.70 |
| 3  | -9  | 6   | -0.78 | 1.33 |
| 0  | -2  | -11 | 4.01  | 0.74 |
| 4  | -3  | -10 | 1.19  | 1.57 |
| 1  | 11  | 3   | 0.68  | 1.30 |
| 0  | -2  | 11  | 4.76  | 0.76 |
| 0  | 2   | -11 | 4.19  | 0.79 |
| 4  | 3   | -10 | 0.54  | 1.49 |
| 1  | -11 | 3   | -0.51 | 1.42 |
| 2  | 10  | 5   | 6.24  | 0.90 |
| 5  | -10 | -1  | 8.22  | 0.96 |
| 5  | -6  | -8  | 9.66  | 1.02 |
| 5  | 10  | -1  | 7.58  | 0.88 |
| 1  | -8  | -8  | 0.96  | 1.23 |
| 9  | -4  | -4  | 1.16  | 1.21 |
| 8  | -2  | -7  | 9.86  | 0.96 |
| 9  | 4   | -4  | -1.53 | 1.27 |
| 2  | -10 | 5   | 4.30  | 0.98 |
| 8  | 2   | -7  | 11.87 | 1.14 |
| 1  | -2  | -11 | 3.69  | 0.69 |
| 5  | 6   | -8  | 7.93  | 1.06 |
| 2  | 1   | -11 | 0.33  | 1.25 |
| 6  | 4   | 8   | -0.18 | 1.17 |
| 3  | 11  | 0   | 8.89  | 0.98 |
| 2  | -1  | -11 | -0.52 | 1.22 |
| 9  | 5   | 2   | 6.72  | 1.06 |
| 3  | -11 | 0   | 6.97  | 1.00 |
| 1  | 2   | -11 | 2.89  | 0.74 |
| 6  | -4  | 8   | 1.34  | 1.21 |
| 1  | 8   | -8  | 0.09  | 1.31 |
| 10 | -1  | 2   | 10.23 | 1.12 |
| 9  | -5  | 2   | 5.46  | 1.09 |
| 10 | 1   | 2   | 7.02  | 1.13 |
| 9  | 1   | 5   | 20.14 | 2.01 |
| 1  | 5   | 10  | 0.48  | 1.30 |
| 9  | -1  | 5   | 20.92 | 2.01 |
| 8  | -7  | -2  | 18.02 | 1.30 |
| 4  | 2   | 10  | 3.77  | 0.76 |
| 8  | 7   | -2  | 16.99 | 1.24 |
| 10 | -2  | -2  | 16.04 | 1.40 |
| 7  | -6  | -6  | 12.98 | 1.26 |
| 10 | 2   | -2  | 20.55 | 1.97 |
| 0  | 9   | 7   | 0.50  | 1.24 |
| 0  | -9  | -7  | -0.56 | 1.45 |
| 4  | -2  | 10  | 4.24  | 0.78 |
| 1  | -5  | 10  | 1.66  | 0.76 |
| 7  | 6   | -6  | 10.08 | 1.02 |
| 5  | 10  | 1   | 1.88  | 0.74 |
| 0  | -9  | 7   | 0.19  | 1.33 |

|    |     |     |       |      |
|----|-----|-----|-------|------|
| 0  | 9   | -7  | -1.45 | 1.50 |
| 7  | 4   | 7   | -2.12 | 1.33 |
| 5  | -10 | 1   | -0.98 | 1.40 |
| 7  | -4  | 7   | 1.94  | 0.72 |
| 10 | 0   | -3  | 0.21  | 1.12 |
| 4  | 5   | 9   | 3.72  | 0.77 |
| 3  | -11 | -1  | -1.49 | 1.47 |
| 3  | 11  | -1  | 0.41  | 1.26 |
| 7  | 0   | 8   | -0.57 | 1.28 |
| 1  | 8   | 8   | 0.60  | 0.95 |
| 1  | -9  | -7  | 5.83  | 0.91 |
| 4  | -5  | 9   | 3.71  | 0.76 |
| 5  | 0   | -10 | -2.43 | 1.48 |
| 6  | -8  | -5  | 1.29  | 0.73 |
| 1  | -8  | 8   | 1.59  | 1.25 |
| 3  | 11  | 1   | 1.94  | 0.84 |
| 3  | -11 | 1   | 1.86  | 1.44 |
| 6  | 8   | -5  | 0.79  | 1.31 |
| 7  | -8  | -3  | 12.79 | 1.18 |
| 1  | 9   | -7  | 7.20  | 0.89 |
| 7  | 8   | -3  | 12.78 | 1.14 |
| 4  | -8  | -7  | -1.58 | 1.47 |
| 1  | 2   | 11  | 1.10  | 1.16 |
| 1  | -2  | 11  | -0.32 | 1.32 |
| 4  | 8   | -7  | 0.22  | 1.25 |
| 9  | -3  | -5  | 1.29  | 1.23 |
| 9  | 3   | -5  | 0.44  | 1.18 |
| 7  | -3  | -8  | 9.20  | 0.97 |
| 2  | -5  | -10 | 2.49  | 0.83 |
| 10 | -1  | -3  | 0.11  | 1.49 |
| 10 | 1   | -3  | 0.42  | 1.45 |
| 7  | 3   | -8  | 11.78 | 1.15 |
| 7  | 1   | 8   | 1.54  | 1.29 |
| 2  | 5   | -10 | 4.48  | 0.90 |
| 7  | -1  | 8   | 2.04  | 0.71 |
| 4  | -7  | -8  | 0.35  | 1.63 |
| 0  | 7   | 9   | 0.90  | 1.24 |
| 1  | 9   | 7   | 0.30  | 1.45 |
| 2  | 0   | 11  | -1.25 | 1.32 |
| 9  | 5   | -3  | 5.10  | 0.82 |
| 6  | -5  | -8  | 3.29  | 0.84 |
| 0  | -7  | -9  | 1.08  | 1.21 |
| 5  | 1   | -10 | -0.67 | 1.39 |
| 9  | -5  | -3  | 4.52  | 0.87 |
| 5  | -1  | -10 | -0.23 | 0.96 |
| 4  | 7   | -8  | 0.43  | 1.53 |
| 7  | -7  | -5  | 0.37  | 1.36 |
| 6  | 9   | -3  | -0.27 | 1.41 |
| 6  | -9  | -3  | 0.02  | 1.41 |
| 6  | 5   | -8  | 3.50  | 0.87 |
| 7  | 7   | -5  | -0.81 | 1.34 |
| 5  | 7   | 7   | 4.44  | 0.73 |
| 1  | -9  | 7   | 0.94  | 1.36 |
| 0  | 7   | -9  | 0.41  | 1.34 |
| 0  | -7  | 9   | 1.21  | 1.37 |
| 3  | 6   | 9   | -0.75 | 1.18 |
| 10 | 3   | 0   | 0.85  | 1.48 |
| 8  | 5   | 5   | 8.56  | 0.88 |

|    |     |     |       |      |
|----|-----|-----|-------|------|
| 6  | 0   | 9   | -1.08 | 1.17 |
| 10 | -3  | 0   | -0.11 | 1.46 |
| 5  | -7  | 7   | 4.78  | 0.78 |
| 8  | 7   | 2   | 0.79  | 1.29 |
| 6  | 7   | 6   | 1.56  | 0.78 |
| 7  | -5  | -7  | 3.21  | 0.87 |
| 8  | -5  | 5   | 7.39  | 0.92 |
| 8  | -7  | 2   | 0.24  | 0.97 |
| 3  | -6  | 9   | 0.72  | 0.67 |
| 7  | 5   | -7  | 2.10  | 1.53 |
| 5  | 10  | -2  | 1.72  | 1.60 |
| 5  | -10 | -2  | 4.24  | 0.93 |
| 6  | -7  | 6   | 1.52  | 0.75 |
| 3  | 4   | 10  | 3.78  | 0.77 |
| 1  | -7  | -9  | 4.72  | 0.83 |
| 2  | -11 | -3  | -0.08 | 1.35 |
| 2  | 11  | -3  | -0.57 | 1.31 |
| 10 | 3   | -1  | -0.53 | 1.54 |
| 10 | -3  | -1  | -2.01 | 1.49 |
| 3  | -4  | 10  | 1.51  | 1.44 |
| 2  | -2  | -11 | -0.41 | 1.09 |
| 1  | 7   | -9  | 5.10  | 0.91 |
| 2  | 2   | -11 | 0.92  | 1.22 |
| 2  | -8  | -8  | 0.96  | 1.33 |
| 2  | -1  | 11  | 0.19  | 1.27 |
| 2  | 1   | 11  | -0.40 | 1.28 |
| 10 | 2   | 2   | 0.85  | 1.26 |
| 5  | 8   | 6   | 0.62  | 1.09 |
| 10 | -2  | 2   | 2.01  | 1.40 |
| 9  | 2   | 5   | 0.74  | 1.25 |
| 2  | 8   | -8  | 1.14  | 1.27 |
| 9  | -2  | 5   | 0.95  | 1.31 |
| 8  | 6   | 4   | 8.99  | 0.88 |
| 6  | 1   | 9   | 0.95  | 1.08 |
| 5  | -8  | 6   | 0.83  | 1.12 |
| 6  | -1  | 9   | 1.99  | 0.69 |
| 8  | -6  | 4   | 8.87  | 0.98 |
| 4  | -10 | -4  | -1.24 | 1.44 |
| 4  | 10  | -4  | -0.30 | 1.48 |
| 2  | 11  | 3   | 6.75  | 0.95 |
| 6  | 6   | 7   | 3.39  | 0.76 |
| 6  | -3  | -9  | 14.88 | 1.26 |
| 6  | 3   | -9  | 12.94 | 1.17 |
| 9  | 0   | -6  | -0.84 | 1.35 |
| 2  | -11 | 3   | 4.35  | 0.96 |
| 3  | 11  | -2  | 4.65  | 0.87 |
| 3  | -11 | -2  | 3.12  | 0.86 |
| 6  | -6  | 7   | 2.78  | 0.76 |
| 5  | 4   | 9   | -2.03 | 1.33 |
| 5  | 10  | 2   | 3.18  | 0.76 |
| 8  | 0   | 7   | -0.33 | 1.33 |
| 5  | -4  | 9   | 0.79  | 1.23 |
| 1  | 7   | 9   | 1.15  | 1.22 |
| 5  | -10 | 2   | 2.92  | 0.80 |
| 7  | 8   | 3   | 8.49  | 0.90 |
| 10 | 3   | 1   | 17.40 | 1.40 |
| 3  | -10 | -5  | 3.31  | 0.95 |
| 10 | -3  | 1   | 17.11 | 1.33 |

|    |     |     |       |      |
|----|-----|-----|-------|------|
| 1  | -7  | 9   | 1.48  | 0.82 |
| 2  | -9  | -7  | 1.81  | 1.48 |
| 7  | -8  | 3   | 11.73 | 1.07 |
| 3  | 10  | -5  | 3.95  | 0.91 |
| 0  | 3   | 11  | 0.35  | 1.16 |
| 3  | 0   | -11 | 0.19  | 1.35 |
| 0  | -3  | -11 | 1.36  | 0.71 |
| 2  | 9   | -7  | -1.09 | 1.49 |
| 0  | 3   | -11 | 1.24  | 1.02 |
| 3  | 11  | 2   | 3.95  | 0.90 |
| 0  | -3  | 11  | 1.15  | 1.19 |
| 5  | -9  | -5  | 7.20  | 1.00 |
| 6  | 9   | 3   | 3.38  | 0.73 |
| 2  | 5   | 10  | 1.68  | 0.70 |
| 9  | 1   | -6  | 1.80  | 0.74 |
| 9  | -1  | -6  | 1.33  | 0.97 |
| 3  | -11 | 2   | 2.40  | 1.61 |
| 5  | 9   | -5  | 7.50  | 0.87 |
| 10 | -2  | -3  | 10.02 | 1.28 |
| 10 | 2   | -3  | 8.99  | 1.34 |
| 6  | -9  | 3   | 2.76  | 0.78 |
| 8  | -3  | -7  | 1.65  | 1.34 |
| 2  | -5  | 10  | 2.97  | 0.75 |
| 7  | 2   | 8   | 7.85  | 0.80 |
| 1  | -3  | -11 | 0.68  | 1.12 |
| 8  | -7  | -3  | -0.17 | 1.41 |
| 8  | 7   | -3  | 2.81  | 0.74 |
| 8  | 1   | 7   | 1.99  | 1.33 |
| 7  | -2  | 8   | 7.06  | 0.86 |
| 8  | -1  | 7   | -0.33 | 1.36 |
| 8  | 3   | -7  | 1.97  | 0.73 |
| 9  | 4   | 4   | 1.76  | 1.00 |
| 4  | -9  | -6  | 0.75  | 1.43 |
| 1  | 3   | -11 | 0.10  | 1.10 |
| 9  | -4  | 4   | 0.10  | 1.50 |
| 10 | 0   | 3   | 1.07  | 0.85 |
| 5  | -2  | -10 | 9.40  | 0.97 |
| 4  | 9   | -6  | 1.65  | 1.32 |
| 4  | 3   | 10  | 1.97  | 1.38 |
| 5  | 2   | -10 | 10.20 | 1.02 |
| 10 | 3   | -2  | 2.57  | 0.93 |
| 10 | -3  | -2  | -1.30 | 1.34 |
| 2  | 8   | 8   | 5.39  | 0.89 |
| 4  | -3  | 10  | 1.80  | 0.74 |
| 6  | 8   | 5   | -2.54 | 1.28 |
| 3  | -1  | -11 | 7.92  | 0.85 |
| 4  | 8   | 7   | -0.17 | 1.27 |
| 3  | 1   | -11 | 9.42  | 0.90 |
| 0  | -11 | -4  | 2.63  | 0.74 |
| 0  | 11  | 4   | -0.40 | 1.26 |
| 5  | 6   | 8   | 2.93  | 0.66 |
| 0  | -10 | -6  | 2.61  | 0.83 |
| 0  | 10  | 6   | 2.54  | 0.78 |
| 9  | 6   | 0   | 9.83  | 1.20 |
| 8  | 4   | 6   | 1.73  | 1.18 |
| 0  | -11 | 4   | 0.60  | 1.21 |
| 2  | -8  | 8   | 5.67  | 0.86 |
| 6  | -8  | 5   | 1.46  | 1.19 |

|    |     |     |       |      |
|----|-----|-----|-------|------|
| 0  | 11  | -4  | 0.11  | 1.29 |
| 9  | -6  | 0   | 10.81 | 1.27 |
| 4  | -8  | 7   | 0.57  | 1.27 |
| 5  | -6  | 8   | 0.37  | 1.40 |
| 4  | 10  | 4   | 1.30  | 0.91 |
| 8  | -4  | 6   | 1.31  | 1.28 |
| 0  | -10 | 6   | 0.93  | 1.32 |
| 0  | 10  | -6  | 1.55  | 1.41 |
| 2  | -7  | -9  | 2.02  | 1.56 |
| 9  | 6   | -1  | 6.28  | 1.13 |
| 4  | -10 | 4   | 1.79  | 1.28 |
| 9  | 5   | 3   | 1.72  | 1.29 |
| 9  | -6  | -1  | 8.13  | 1.16 |
| 9  | -5  | 3   | -2.09 | 1.51 |
| 2  | 7   | -9  | -1.36 | 1.57 |
| 2  | 2   | 11  | -0.08 | 1.29 |
| 2  | -2  | 11  | 0.27  | 1.05 |
| 10 | -1  | 3   | 6.73  | 1.05 |
| 10 | 1   | 3   | 6.53  | 0.98 |
| 7  | 6   | 6   | 17.62 | 1.35 |
| 2  | 9   | 7   | 0.94  | 1.36 |
| 3  | 10  | 5   | 4.34  | 0.80 |
| 1  | -10 | -6  | 1.47  | 1.32 |
| 6  | 2   | 9   | 11.67 | 1.15 |
| 5  | -5  | -9  | -3.18 | 1.54 |
| 6  | -2  | 9   | 10.38 | 0.92 |
| 7  | -6  | 6   | 22.44 | 1.98 |
| 1  | -11 | -4  | 1.93  | 1.34 |
| 5  | 5   | -9  | -1.50 | 1.46 |
| 1  | 3   | 11  | -2.13 | 1.16 |
| 4  | -4  | -10 | 1.87  | 0.95 |
| 3  | -10 | 5   | 1.53  | 1.40 |
| 1  | 11  | -4  | 1.78  | 1.21 |
| 2  | -9  | 7   | 1.01  | 1.32 |
| 1  | -3  | 11  | -0.17 | 1.15 |
| 4  | 7   | 8   | 6.42  | 0.82 |
| 1  | 10  | -6  | -2.41 | 1.33 |
| 4  | 4   | -10 | -1.45 | 1.50 |
| 4  | -6  | -9  | 8.40  | 1.14 |
| 4  | 6   | -9  | 9.57  | 1.03 |
| 4  | -7  | 8   | 6.99  | 0.87 |
| 1  | 11  | 4   | 1.89  | 1.47 |
| 7  | 7   | 5   | 0.01  | 1.23 |
| 1  | -11 | 4   | 1.96  | 1.40 |
| 9  | 6   | 1   | 3.38  | 1.14 |
| 1  | 10  | 6   | 2.14  | 1.46 |
| 9  | -6  | 1   | 5.27  | 1.06 |
| 7  | -7  | 5   | 0.37  | 1.20 |
| 3  | -5  | -10 | 6.73  | 0.93 |
| 10 | 0   | -4  | 3.01  | 1.19 |
| 5  | -10 | -3  | 2.31  | 1.55 |
| 1  | -10 | 6   | 0.33  | 1.58 |
| 3  | 5   | -10 | 8.33  | 1.06 |
| 5  | 10  | -3  | 1.41  | 0.94 |
| 9  | -2  | -6  | -0.51 | 1.35 |
| 8  | -6  | -5  | 4.08  | 0.91 |
| 8  | 6   | -5  | 2.98  | 0.91 |
| 8  | -5  | -6  | 1.61  | 1.41 |



|    |     |     |       |      |
|----|-----|-----|-------|------|
| 9  | 2   | -6  | 0.87  | 1.19 |
| 8  | 5   | -6  | 1.81  | 1.29 |
| 2  | -3  | -11 | 4.46  | 0.80 |
| 8  | 2   | 7   | 1.14  | 1.21 |
| 8  | -2  | 7   | -0.08 | 1.16 |
| 2  | 3   | -11 | 8.20  | 0.85 |
| 10 | 3   | 2   | 1.85  | 1.33 |
| 9  | 3   | 5   | 3.70  | 0.93 |
| 10 | -3  | 2   | 1.84  | 1.46 |
| 7  | -8  | -4  | -0.54 | 1.43 |
| 5  | 9   | 5   | 5.21  | 0.78 |
| 7  | 8   | -4  | 0.20  | 1.24 |
| 9  | -3  | 5   | 0.86  | 1.20 |
| 8  | 7   | 3   | 3.73  | 0.74 |
| 5  | 0   | 10  | 0.70  | 1.07 |
| 3  | -2  | -11 | 0.53  | 1.21 |
| 4  | 9   | 6   | 8.09  | 0.88 |
| 3  | 2   | -11 | 1.30  | 1.22 |
| 8  | -7  | 3   | 1.10  | 1.40 |
| 9  | 6   | -2  | 4.80  | 0.79 |
| 2  | 7   | 9   | -1.23 | 1.32 |
| 5  | -9  | 5   | 3.37  | 0.82 |
| 10 | 1   | -4  | 25.70 | 1.82 |
| 9  | -6  | -2  | 3.38  | 0.84 |
| 10 | -1  | -4  | 34.21 | 2.58 |
| 4  | -9  | 6   | 9.35  | 0.90 |
| 4  | 11  | 0   | -0.51 | 1.22 |
| 2  | -7  | 9   | -0.66 | 1.23 |
| 9  | -4  | -5  | 0.88  | 1.35 |
| 9  | 4   | -5  | 0.18  | 1.21 |
| 3  | -8  | -8  | -1.42 | 1.66 |
| 3  | -11 | -3  | -1.43 | 1.32 |
| 4  | -11 | 0   | -0.31 | 1.36 |
| 3  | 11  | -3  | -0.30 | 1.23 |
| 7  | -4  | -8  | 4.13  | 0.91 |
| 9  | -5  | -4  | 20.20 | 1.35 |
| 6  | 5   | 8   | 1.03  | 0.68 |
| 9  | 5   | -4  | 18.74 | 1.82 |
| 7  | 4   | -8  | 4.43  | 0.85 |
| 3  | 8   | -8  | -0.20 | 1.38 |
| 10 | 2   | 3   | -1.32 | 1.37 |
| 6  | -5  | 8   | 0.64  | 1.29 |
| 6  | -9  | -4  | 5.43  | 0.85 |
| 0  | 6   | 10  | 5.29  | 0.88 |
| 6  | 9   | -4  | 3.80  | 0.82 |
| 3  | 0   | 11  | 2.71  | 0.77 |
| 0  | -6  | -10 | 7.27  | 0.93 |
| 10 | -2  | 3   | 0.10  | 1.37 |
| 5  | 1   | 10  | -0.44 | 1.10 |
| 5  | -1  | 10  | -0.79 | 1.20 |
| 0  | 6   | -10 | 8.19  | 0.96 |
| 10 | 4   | 0   | -0.45 | 1.43 |
| 0  | -6  | 10  | 6.62  | 0.92 |
| 10 | -4  | 0   | 2.57  | 0.96 |
| 7  | 5   | 7   | 2.78  | 0.78 |
| 4  | 11  | -1  | 3.50  | 0.82 |
| 4  | -11 | -1  | 3.07  | 0.83 |
| 5  | 10  | 3   | -1.35 | 1.33 |

|    |     |     |       |      |
|----|-----|-----|-------|------|
| 7  | -5  | 7   | 2.46  | 0.81 |
| 10 | 4   | -1  | 27.44 | 2.15 |
| 1  | -6  | -10 | 3.51  | 0.87 |
| 5  | -10 | 3   | -2.67 | 1.38 |
| 2  | -10 | -6  | 2.53  | 0.92 |
| 10 | -4  | -1  | 23.25 | 1.67 |
| 10 | -3  | -3  | 5.36  | 1.21 |
| 10 | 3   | -3  | 7.17  | 1.11 |
| 7  | 3   | 8   | 12.93 | 1.10 |
| 2  | 10  | -6  | 3.51  | 0.84 |
| 2  | -11 | -4  | 0.17  | 0.82 |
| 1  | 6   | -10 | 4.22  | 0.85 |
| 7  | -3  | 8   | 11.28 | 0.96 |
| 3  | 11  | 3   | 1.55  | 1.42 |
| 2  | 11  | -4  | 0.00  | 1.26 |
| 4  | 11  | 1   | 0.31  | 1.43 |
| 4  | -11 | 1   | 1.06  | 1.32 |
| 5  | -3  | -10 | 0.75  | 1.59 |
| 3  | -9  | -7  | -0.11 | 1.56 |
| 3  | 1   | 11  | 4.88  | 0.78 |
| 3  | -1  | 11  | 4.92  | 0.82 |
| 5  | 3   | -10 | 1.00  | 1.64 |
| 3  | -11 | 3   | 0.92  | 0.84 |
| 7  | 9   | 0   | 9.44  | 1.02 |
| 3  | 9   | -7  | 2.70  | 0.76 |
| 7  | -9  | 0   | 11.21 | 1.03 |
| 7  | 0   | -9  | -0.53 | 1.41 |
| 6  | -4  | -9  | 1.00  | 1.55 |
| 6  | 4   | -9  | 3.29  | 0.88 |
| 6  | -7  | -7  | 1.85  | 0.87 |
| 6  | 7   | -7  | 0.52  | 1.71 |
| 7  | 9   | -1  | 7.15  | 0.97 |
| 7  | -9  | -1  | 9.58  | 0.97 |
| 9  | 6   | 2   | 8.10  | 1.20 |
| 2  | 3   | 11  | 1.69  | 0.69 |
| 2  | 11  | 4   | -2.63 | 1.41 |
| 9  | -6  | 2   | 10.82 | 1.15 |
| 8  | 0   | -8  | 10.93 | 1.00 |
| 2  | -3  | 11  | 0.45  | 1.19 |
| 10 | 4   | 1   | 10.79 | 1.31 |
| 1  | 6   | 10  | 1.93  | 0.81 |
| 2  | -11 | 4   | 0.43  | 1.49 |
| 10 | -4  | 1   | 12.07 | 1.25 |
| 6  | 3   | 9   | 4.52  | 0.87 |
| 7  | -1  | -9  | 11.52 | 1.04 |
| 7  | 1   | -9  | 15.19 | 1.27 |
| 0  | 4   | 11  | 7.20  | 0.81 |
| 0  | -4  | -11 | 5.35  | 0.89 |
| 1  | -6  | 10  | 3.21  | 0.82 |
| 9  | 0   | 6   | -1.58 | 1.41 |
| 2  | 10  | 6   | 4.41  | 0.91 |
| 6  | -3  | 9   | 6.34  | 0.82 |
| 10 | 2   | -4  | 1.31  | 1.56 |
| 10 | -2  | -4  | 1.97  | 1.59 |
| 3  | -7  | -9  | 6.82  | 1.06 |
| 0  | -4  | 11  | 8.13  | 0.86 |
| 0  | 4   | -11 | 9.11  | 0.90 |
| 0  | 12  | 0   | 1.21  | 1.30 |

|    |     |     |       |      |
|----|-----|-----|-------|------|
| 0  | -12 | 0   | 1.71  | 1.28 |
| 2  | -10 | 6   | 2.02  | 1.65 |
| 3  | 5   | 10  | 1.59  | 1.35 |
| 3  | 7   | -9  | 8.56  | 1.00 |
| 8  | 7   | -4  | 9.13  | 0.90 |
| 7  | 9   | 1   | 10.18 | 1.01 |
| 8  | -7  | -4  | 8.62  | 0.94 |
| 4  | 6   | 9   | 0.62  | 1.13 |
| 7  | -9  | 1   | 8.83  | 1.00 |
| 8  | -4  | -7  | 14.37 | 1.20 |
| 1  | -4  | -11 | 0.18  | 1.15 |
| 8  | 4   | -7  | 10.97 | 0.99 |
| 3  | -5  | 10  | 0.64  | 1.43 |
| 4  | -6  | 9   | 0.88  | 0.74 |
| 1  | 4   | -11 | -0.58 | 1.20 |
| 8  | 8   | 0   | 3.20  | 0.86 |
| 7  | 8   | 4   | 0.18  | 1.16 |
| 8  | -1  | -8  | 1.41  | 1.36 |
| 3  | 8   | 8   | 0.00  | 1.33 |
| 8  | 1   | -8  | 3.25  | 0.80 |
| 10 | 4   | -2  | -0.81 | 1.59 |
| 4  | 4   | 10  | -0.62 | 1.16 |
| 10 | -4  | -2  | 0.76  | 1.45 |
| 8  | -8  | 0   | 5.42  | 0.88 |
| 7  | -8  | 4   | 0.09  | 1.15 |
| 5  | -8  | -7  | -1.51 | 1.64 |
| 6  | -8  | -6  | -0.90 | 1.59 |
| 5  | 2   | 10  | 10.15 | 0.93 |
| 5  | -2  | 10  | 11.26 | 0.90 |
| 4  | -4  | 10  | -0.46 | 1.25 |
| 6  | 8   | -6  | 0.89  | 1.11 |
| 6  | 9   | 4   | 1.49  | 0.76 |
| 5  | 8   | -7  | 0.00  | 1.45 |
| 4  | 0   | -11 | 0.00  | 1.42 |
| 3  | -8  | 8   | 0.68  | 1.35 |
| 4  | -11 | -2  | -1.84 | 1.43 |
| 9  | 1   | 6   | 1.54  | 1.43 |
| 4  | 11  | -2  | -0.42 | 1.43 |
| 9  | -1  | 6   | 1.31  | 1.49 |
| 8  | 8   | -1  | -1.03 | 1.41 |
| 0  | 12  | -1  | 7.43  | 0.92 |
| 9  | 3   | -6  | 9.93  | 0.95 |
| 0  | 12  | 1   | 6.25  | 0.89 |
| 8  | -8  | -1  | 0.19  | 1.25 |
| 9  | -3  | -6  | 10.15 | 0.90 |
| 0  | -12 | -1  | 4.87  | 0.85 |
| 6  | -9  | 4   | 0.10  | 1.31 |
| 4  | -10 | -5  | 0.87  | 1.44 |
| 0  | -12 | 1   | 5.35  | 0.89 |
| 5  | -7  | -8  | 0.97  | 1.55 |
| 4  | 10  | -5  | 0.73  | 1.21 |
| 5  | 5   | 9   | 1.15  | 1.23 |
| 2  | -6  | -10 | -2.12 | 1.50 |
| 8  | 3   | 7   | 8.87  | 0.88 |
| 1  | -12 | 0   | 4.65  | 0.86 |
| 1  | 12  | 0   | 4.70  | 0.95 |
| 5  | 7   | -8  | -2.51 | 1.56 |
| 6  | 10  | 0   | -0.10 | 1.41 |

|    |     |     |       |      |
|----|-----|-----|-------|------|
| 6  | -10 | 0   | 2.09  | 1.48 |
| 5  | -5  | 9   | -0.74 | 1.05 |
| 2  | 6   | -10 | -0.88 | 1.58 |
| 6  | -6  | -8  | -0.10 | 1.44 |
| 8  | -3  | 7   | 9.79  | 0.92 |
| 3  | 9   | 7   | 5.38  | 0.80 |
| 9  | 6   | -3  | 1.27  | 1.40 |
| 9  | -6  | -3  | -0.37 | 1.53 |
| 6  | 6   | -8  | 1.98  | 1.40 |
| 3  | 2   | 11  | 1.77  | 1.31 |
| 10 | 0   | 4   | -0.35 | 1.21 |
| 3  | -2  | 11  | 1.34  | 1.23 |
| 7  | -7  | -6  | 2.21  | 0.85 |
| 8  | 6   | 5   | 14.15 | 1.25 |
| 3  | -9  | 7   | 4.28  | 0.87 |
| 7  | 7   | -6  | 2.73  | 0.80 |
| 3  | -3  | -11 | 1.43  | 1.30 |
| 4  | -1  | -11 | 0.63  | 0.75 |
| 3  | 3   | -11 | 1.35  | 0.88 |
| 4  | 11  | 2   | -1.88 | 1.33 |
| 7  | 9   | -2  | 1.86  | 1.50 |
| 7  | -6  | -7  | 5.76  | 0.95 |
| 4  | 1   | -11 | 0.46  | 1.72 |
| 1  | 4   | 11  | 0.53  | 1.19 |
| 7  | -9  | -2  | -0.29 | 1.62 |
| 6  | 10  | -1  | 1.47  | 1.05 |
| 8  | -6  | 5   | 14.55 | 1.20 |
| 7  | 6   | -7  | 4.46  | 0.97 |
| 1  | -4  | 11  | -0.46 | 1.18 |
| 4  | -11 | 2   | 0.64  | 1.36 |
| 6  | -10 | -1  | 1.31  | 1.64 |
| 8  | 8   | 1   | -0.46 | 1.28 |
| 1  | -12 | -1  | 1.32  | 0.97 |
| 8  | -8  | 1   | 1.31  | 1.28 |
| 1  | 12  | -1  | -0.41 | 1.48 |
| 9  | 5   | 4   | 2.67  | 1.19 |
| 1  | 12  | 1   | -1.24 | 1.54 |
| 1  | -12 | 1   | 1.32  | 1.34 |
| 10 | 3   | 3   | 18.27 | 1.41 |
| 10 | -3  | 3   | 20.43 | 2.04 |
| 9  | -5  | 4   | 7.60  | 1.15 |
| 10 | 1   | 4   | 5.93  | 1.10 |
| 6  | 0   | -10 | 4.92  | 0.89 |
| 10 | -1  | 4   | 5.01  | 1.12 |
| 7  | -2  | -9  | -1.07 | 1.40 |
| 7  | 2   | -9  | -3.30 | 1.46 |
| 6  | 10  | 1   | 0.99  | 1.39 |
| 6  | -10 | 1   | 0.10  | 1.32 |
| 5  | -10 | -4  | 2.36  | 0.91 |
| 8  | 5   | 6   | 0.00  | 1.39 |
| 5  | 10  | -4  | 3.12  | 0.84 |
| 8  | -5  | 6   | 1.56  | 0.80 |
| 2  | -4  | -11 | 1.89  | 1.40 |
| 0  | 11  | 5   | 3.71  | 0.87 |
| 0  | -11 | -5  | 0.42  | 1.55 |
| 2  | 4   | -11 | 3.67  | 0.86 |
| 10 | 4   | 2   | 0.88  | 1.34 |
| 8  | -2  | -8  | 6.07  | 0.91 |

|    |     |     |       |      |
|----|-----|-----|-------|------|
| 10 | -4  | 2   | 1.88  | 0.90 |
| 0  | -11 | 5   | 1.24  | 1.44 |
| 0  | 11  | -5  | 3.14  | 0.83 |
| 9  | 4   | 5   | -0.32 | 1.34 |
| 8  | 8   | -2  | -1.15 | 1.33 |
| 8  | 2   | -8  | 4.78  | 0.87 |
| 6  | -1  | -10 | 1.06  | 1.42 |
| 6  | 1   | -10 | 1.12  | 1.42 |
| 8  | -8  | -2  | -0.10 | 1.34 |
| 9  | -4  | 5   | 0.36  | 1.28 |
| 3  | 7   | 9   | 3.24  | 0.78 |
| 9  | 2   | 6   | 0.58  | 1.34 |
| 4  | -5  | -10 | 1.34  | 1.80 |
| 7  | 9   | 2   | 3.15  | 0.85 |
| 4  | 10  | 5   | 1.57  | 1.18 |
| 9  | -2  | 6   | 1.47  | 0.86 |
| 3  | -10 | -6  | 5.16  | 0.92 |
| 7  | -9  | 2   | 4.41  | 0.84 |
| 3  | -7  | 9   | 5.10  | 0.75 |
| 2  | 6   | 10  | -0.01 | 1.31 |
| 4  | 5   | -10 | 1.35  | 1.60 |
| 4  | -10 | 5   | 1.43  | 1.22 |
| 0  | -12 | -2  | -0.94 | 1.44 |
| 3  | 10  | -6  | 4.56  | 0.88 |
| 0  | 12  | 2   | -0.73 | 1.29 |
| 1  | -11 | -5  | 0.10  | 1.43 |
| 2  | -6  | 10  | 0.09  | 1.28 |
| 3  | -11 | -4  | 0.42  | 1.45 |
| 0  | -12 | 2   | 0.30  | 1.23 |
| 5  | -9  | -6  | 1.53  | 1.54 |
| 0  | 12  | -2  | -0.52 | 1.34 |
| 3  | 11  | -4  | 1.14  | 1.42 |
| 5  | 9   | -6  | 0.54  | 1.58 |
| 1  | 11  | -5  | -3.19 | 1.44 |
| 0  | -9  | -8  | 0.61  | 1.33 |
| 0  | 9   | 8   | 0.81  | 1.29 |
| 10 | 0   | -5  | -1.88 | 1.65 |
| 6  | 10  | -2  | 8.78  | 0.98 |
| 8  | 7   | 4   | 2.74  | 0.83 |
| 6  | -10 | -2  | 7.13  | 1.04 |
| 0  | -9  | 8   | -0.23 | 1.34 |
| 0  | 9   | -8  | 1.46  | 0.76 |
| 4  | -2  | -11 | 4.37  | 0.80 |
| 4  | 2   | -11 | 5.19  | 0.94 |
| 10 | -3  | -4  | 4.83  | 1.11 |
| 8  | -7  | 4   | 4.65  | 0.83 |
| 10 | 3   | -4  | 2.28  | 1.59 |
| 6  | 7   | 7   | -1.84 | 1.39 |
| 1  | 11  | 5   | 1.08  | 1.35 |
| 2  | -12 | 0   | -0.22 | 1.51 |
| 2  | 12  | 0   | 0.94  | 1.42 |
| 9  | 0   | -7  | 10.52 | 0.96 |
| 1  | -9  | -8  | 1.79  | 0.78 |
| 1  | -11 | 5   | -0.98 | 1.39 |
| 10 | -4  | -3  | 11.32 | 1.34 |
| 10 | 4   | -3  | 9.27  | 1.27 |
| 6  | -7  | 7   | 0.18  | 1.32 |
| 7  | 4   | 8   | 6.37  | 0.84 |

|    |     |     |       |      |
|----|-----|-----|-------|------|
| 9  | 6   | 3   | 6.98  | 1.09 |
| 1  | -12 | -2  | 4.25  | 0.89 |
| 7  | -4  | 8   | 7.86  | 0.85 |
| 4  | -8  | -8  | 3.46  | 1.08 |
| 1  | 12  | -2  | 4.02  | 0.87 |
| 9  | -6  | 3   | 5.15  | 1.12 |
| 1  | 9   | -8  | 1.41  | 1.31 |
| 7  | -8  | -5  | 11.86 | 0.98 |
| 5  | -4  | -10 | 20.78 | 2.04 |
| 0  | 8   | 9   | 0.58  | 1.24 |
| 0  | -8  | -9  | 0.67  | 1.35 |
| 1  | 12  | 2   | -1.49 | 1.39 |
| 5  | 4   | -10 | 18.28 | 1.57 |
| 4  | 8   | -8  | 6.02  | 0.87 |
| 10 | 2   | 4   | 0.92  | 1.19 |
| 7  | 8   | -5  | 8.51  | 1.02 |
| 10 | -2  | 4   | 0.58  | 1.29 |
| 5  | 3   | 10  | -1.19 | 1.35 |
| 5  | 8   | 7   | 3.55  | 0.82 |
| 10 | 1   | -5  | 2.41  | 1.67 |
| 10 | -1  | -5  | 2.18  | 1.78 |
| 5  | 10  | 4   | 0.39  | 1.29 |
| 1  | -12 | 2   | -0.94 | 1.51 |
| 0  | 8   | -9  | -0.12 | 1.31 |
| 0  | -8  | 9   | -0.66 | 1.39 |
| 5  | -3  | 10  | -0.74 | 1.36 |
| 5  | -6  | -9  | 2.08  | 1.63 |
| 4  | -11 | -3  | 1.20  | 1.68 |
| 8  | 8   | 2   | 14.09 | 1.29 |
| 6  | 8   | 6   | 7.67  | 0.91 |
| 4  | 11  | -3  | 4.42  | 0.84 |
| 5  | 6   | -9  | 4.62  | 0.94 |
| 5  | -8  | 7   | 1.35  | 1.47 |
| 5  | -10 | 4   | -0.72 | 1.27 |
| 2  | -12 | -1  | 2.53  | 0.89 |
| 2  | 12  | -1  | 2.84  | 0.92 |
| 8  | -8  | 2   | 17.92 | 1.30 |
| 6  | -8  | 6   | 7.01  | 0.88 |
| 3  | 11  | 4   | -2.02 | 1.44 |
| 9  | -5  | -5  | 3.15  | 0.81 |
| 9  | 5   | -5  | 4.28  | 0.79 |
| 1  | -8  | -9  | 1.83  | 0.79 |
| 9  | -1  | -7  | 2.92  | 0.85 |
| 9  | 1   | -7  | 2.34  | 0.83 |
| 2  | 12  | 1   | 0.84  | 1.43 |
| 7  | -5  | -8  | 9.99  | 1.05 |
| 3  | -11 | 4   | -1.21 | 1.35 |
| 7  | 5   | -8  | 9.91  | 1.02 |
| 6  | 10  | 2   | -2.80 | 1.47 |
| 2  | -12 | 1   | 2.00  | 1.42 |
| 2  | 4   | 11  | 0.49  | 0.87 |
| 1  | 9   | 8   | 0.69  | 1.31 |
| 1  | 8   | -9  | 0.77  | 0.97 |
| 6  | -10 | 2   | 5.53  | 0.95 |
| 3  | 3   | 11  | 0.35  | 1.21 |
| 6  | -9  | -5  | -2.11 | 1.49 |
| 2  | -4  | 11  | 0.94  | 0.81 |
| 3  | 10  | 6   | -0.31 | 1.38 |

|    |     |     |       |      |
|----|-----|-----|-------|------|
| 7  | 9   | -3  | 1.82  | 1.26 |
| 7  | -9  | -3  | 0.98  | 1.38 |
| 3  | -3  | 11  | -1.03 | 1.25 |
| 6  | -2  | -10 | 4.09  | 0.94 |
| 1  | -9  | 8   | 0.76  | 1.20 |
| 6  | 9   | -5  | -0.01 | 1.31 |
| 6  | 2   | -10 | 3.62  | 0.93 |
| 6  | 4   | 9   | 9.91  | 0.91 |
| 3  | -10 | 6   | 1.21  | 1.01 |
| 3  | -6  | -10 | 0.64  | 1.49 |
| 10 | 5   | 0   | 2.20  | 1.56 |
| 10 | -5  | 0   | 1.87  | 1.56 |
| 4  | -9  | -7  | 1.02  | 1.41 |
| 6  | -4  | 9   | 11.00 | 0.95 |
| 5  | 7   | 8   | 0.77  | 0.90 |
| 9  | 7   | 0   | 0.37  | 1.38 |
| 3  | 6   | -10 | 0.90  | 1.56 |
| 9  | -7  | 0   | 2.27  | 1.54 |
| 4  | 9   | -7  | 1.40  | 1.35 |
| 8  | -6  | -6  | 8.55  | 1.05 |
| 5  | -7  | 8   | -0.58 | 1.18 |
| 10 | 5   | -1  | -1.12 | 1.60 |
| 10 | -5  | -1  | 0.93  | 1.45 |
| 8  | 6   | -6  | 9.40  | 1.02 |
| 4  | 0   | 11  | -0.19 | 1.22 |
| 9  | 7   | -1  | 2.59  | 1.08 |
| 9  | -7  | -1  | 4.17  | 1.17 |
| 1  | 8   | 9   | 3.49  | 0.86 |
| 4  | 11  | 3   | 1.79  | 1.34 |
| 1  | -8  | 9   | 2.94  | 0.94 |
| 4  | -11 | 3   | 2.06  | 1.39 |
| 7  | 7   | 6   | 1.38  | 1.39 |
| 2  | -11 | -5  | -2.80 | 1.57 |
| 0  | -10 | -7  | 1.40  | 1.56 |
| 0  | 10  | 7   | 0.57  | 0.88 |
| 7  | -3  | -9  | -2.60 | 1.60 |
| 7  | 0   | 9   | 0.73  | 1.17 |
| 7  | 3   | -9  | 1.90  | 1.41 |
| 2  | 11  | -5  | 0.88  | 0.91 |
| 7  | -7  | 6   | 1.47  | 1.05 |
| 0  | -10 | 7   | -2.98 | 1.54 |
| 0  | 10  | -7  | -1.22 | 1.55 |
| 6  | -5  | -9  | 5.14  | 0.90 |
| 9  | -4  | -6  | 3.40  | 0.83 |
| 6  | 5   | -9  | 4.92  | 0.96 |
| 4  | -7  | -9  | 0.71  | 1.59 |
| 4  | 1   | 11  | -0.83 | 1.26 |
| 9  | 4   | -6  | 3.43  | 0.85 |
| 4  | -1  | 11  | 1.28  | 1.15 |
| 0  | 0   | -12 | 3.39  | 0.80 |
| 0  | 0   | 12  | 1.64  | 1.31 |
| 8  | 4   | 7   | 3.77  | 0.79 |
| 9  | -6  | -4  | -2.37 | 1.52 |
| 6  | 6   | 8   | 4.55  | 0.82 |
| 4  | 7   | -9  | 0.55  | 1.44 |
| 11 | 0   | 0   | 1.73  | 1.28 |
| 9  | 6   | -4  | 0.08  | 1.33 |
| 8  | 8   | -3  | 0.38  | 1.28 |

|    |     |     |       |      |
|----|-----|-----|-------|------|
| 8  | -8  | -3  | 1.33  | 1.21 |
| 2  | -9  | -8  | 2.84  | 0.93 |
| 8  | -4  | 7   | 0.27  | 1.52 |
| 1  | -10 | -7  | -0.01 | 1.37 |
| 5  | 11  | 0   | -1.30 | 1.44 |
| 8  | -3  | -8  | 0.64  | 1.33 |
| 11 | 0   | -1  | 3.46  | 1.00 |
| 5  | 9   | 6   | 3.96  | 0.78 |
| 6  | -6  | 8   | 4.44  | 0.85 |
| 5  | -11 | 0   | -0.34 | 1.40 |
| 10 | 5   | 1   | 7.99  | 1.11 |
| 9  | 7   | 1   | -0.11 | 1.37 |
| 1  | 0   | -12 | -2.78 | 1.30 |
| 8  | 3   | -8  | 0.93  | 1.35 |
| 10 | 2   | -5  | 4.89  | 1.09 |
| 10 | -2  | -5  | 5.31  | 1.20 |
| 1  | 10  | -7  | -0.11 | 1.17 |
| 10 | -5  | 1   | 5.24  | 1.25 |
| 2  | 9   | -8  | 2.87  | 0.88 |
| 9  | -7  | 1   | 0.96  | 1.38 |
| 8  | 0   | 8   | 0.27  | 1.37 |
| 0  | -5  | -11 | 0.72  | 1.36 |
| 7  | 1   | 9   | 10.70 | 0.94 |
| 3  | -4  | -11 | 0.84  | 1.32 |
| 7  | -1  | 9   | 11.63 | 1.10 |
| 0  | 5   | 11  | 1.19  | 1.22 |
| 9  | 3   | 6   | 4.39  | 1.04 |
| 5  | -9  | 6   | 0.79  | 1.28 |
| 7  | 6   | 7   | 5.19  | 0.86 |
| 9  | -3  | 6   | 1.97  | 1.59 |
| 3  | 4   | -11 | 1.66  | 0.80 |
| 0  | -5  | 11  | -1.00 | 1.40 |
| 2  | -12 | -2  | -0.02 | 1.29 |
| 0  | 5   | -11 | -1.10 | 1.42 |
| 2  | 12  | -2  | -0.32 | 1.46 |
| 8  | -7  | -5  | 0.76  | 1.37 |
| 7  | -6  | 7   | 4.69  | 0.88 |
| 2  | 11  | 5   | -0.13 | 1.55 |
| 5  | 11  | -1  | 0.86  | 1.42 |
| 8  | 7   | -5  | -1.29 | 1.46 |
| 0  | -1  | -12 | 1.66  | 0.78 |
| 0  | 1   | 12  | 2.52  | 0.75 |
| 9  | -2  | -7  | 2.20  | 1.53 |
| 5  | -11 | -1  | -1.89 | 1.51 |
| 9  | 2   | -7  | 1.00  | 1.31 |
| 0  | -1  | 12  | 2.75  | 0.74 |
| 0  | 1   | -12 | 3.12  | 0.73 |
| 8  | -5  | -7  | 1.97  | 1.41 |
| 1  | -5  | -11 | 1.66  | 1.33 |
| 2  | -8  | -9  | 1.69  | 0.79 |
| 11 | 1   | 0   | -1.49 | 1.49 |
| 11 | -1  | 0   | 2.15  | 0.98 |
| 8  | 5   | -7  | 1.19  | 1.02 |
| 2  | -11 | 5   | -1.02 | 1.38 |
| 1  | 10  | 7   | 3.68  | 0.92 |
| 2  | 8   | -9  | -0.02 | 1.42 |
| 10 | 4   | 3   | -2.07 | 1.44 |
| 0  | 12  | 3   | 0.51  | 1.48 |



|    |     |     |       |      |
|----|-----|-----|-------|------|
| 0  | -12 | -3  | 1.06  | 1.25 |
| 1  | 5   | -11 | -1.06 | 1.43 |
| 1  | -1  | -12 | 1.47  | 1.15 |
| 10 | -4  | 3   | 0.82  | 0.89 |
| 6  | -10 | -3  | 4.95  | 0.92 |
| 6  | 10  | -3  | 4.95  | 0.90 |
| 11 | -1  | -1  | 13.57 | 1.35 |
| 2  | 12  | 2   | -1.22 | 1.56 |
| 11 | 1   | -1  | 14.67 | 1.47 |
| 0  | -12 | 3   | -0.75 | 1.27 |
| 1  | 1   | -12 | -1.51 | 1.31 |
| 0  | 12  | -3  | -2.10 | 1.37 |
| 10 | 5   | -2  | -0.45 | 1.51 |
| 7  | 9   | 3   | 0.18  | 1.26 |
| 4  | 5   | 10  | -0.29 | 1.25 |
| 10 | -5  | -2  | -0.46 | 1.41 |
| 1  | -10 | 7   | 2.23  | 1.59 |
| 2  | -12 | 2   | 1.39  | 1.54 |
| 8  | 1   | 8   | 13.10 | 1.21 |
| 4  | -3  | -11 | 2.50  | 0.91 |
| 8  | -1  | 8   | 13.80 | 1.15 |
| 4  | -5  | 10  | 0.46  | 0.72 |
| 7  | -9  | 3   | -0.41 | 1.40 |
| 9  | 7   | -2  | 0.07  | 1.44 |
| 5  | 11  | 1   | 1.27  | 1.31 |
| 4  | 3   | -11 | 3.07  | 0.99 |
| 9  | -7  | -2  | 3.01  | 1.03 |
| 4  | 8   | 8   | 0.07  | 1.43 |
| 5  | -11 | 1   | -0.78 | 1.41 |
| 11 | 0   | 1   | 1.29  | 0.97 |
| 4  | -8  | 8   | 1.58  | 1.35 |
| 1  | 0   | 12  | -2.25 | 1.35 |
| 7  | 8   | 5   | 6.78  | 0.85 |
| 1  | -12 | -3  | 0.09  | 1.38 |
| 0  | -7  | -10 | -0.02 | 1.39 |
| 0  | 7   | 10  | -0.50 | 1.27 |
| 10 | 3   | 4   | -0.92 | 1.50 |
| 1  | 12  | -3  | 0.50  | 1.38 |
| 10 | -3  | 4   | 0.59  | 1.26 |
| 2  | 9   | 8   | 2.25  | 1.51 |
| 7  | -8  | 5   | 5.67  | 0.94 |
| 6  | 9   | 5   | 0.47  | 1.27 |
| 4  | 9   | 7   | 3.80  | 0.83 |
| 0  | -7  | 10  | -1.10 | 1.55 |
| 0  | 7   | -10 | 0.67  | 0.78 |
| 1  | 5   | 11  | 1.55  | 1.43 |
| 11 | 0   | -2  | 0.59  | 1.50 |
| 1  | 12  | 3   | 1.07  | 1.10 |
| 2  | -9  | 8   | 3.30  | 0.83 |
| 3  | 6   | 10  | -0.67 | 1.18 |
| 1  | -5  | 11  | 1.35  | 1.27 |
| 6  | -9  | 5   | 0.19  | 0.72 |
| 4  | -9  | 7   | 3.88  | 0.85 |
| 11 | 1   | 1   | 9.39  | 1.13 |
| 1  | -12 | 3   | 1.08  | 0.84 |
| 1  | -7  | -10 | 0.67  | 1.42 |
| 4  | 2   | 11  | 9.90  | 0.87 |
| 11 | -1  | 1   | 6.60  | 1.16 |

|    |     |     |       |      |
|----|-----|-----|-------|------|
| 4  | -2  | 11  | 7.20  | 0.88 |
| 6  | 0   | 10  | 3.11  | 0.78 |
| 3  | -6  | 10  | -1.18 | 1.26 |
| 1  | 1   | 12  | 1.48  | 1.06 |
| 3  | -12 | 0   | 1.31  | 1.48 |
| 5  | 0   | -11 | 9.83  | 1.02 |
| 1  | 7   | -10 | -0.02 | 1.41 |
| 1  | -1  | 12  | 1.48  | 1.33 |
| 3  | 12  | 0   | -1.12 | 1.57 |
| 2  | 0   | -12 | 4.57  | 0.79 |
| 6  | -3  | -10 | -2.65 | 1.61 |
| 2  | -10 | -7  | 1.22  | 1.49 |
| 6  | 3   | -10 | -0.55 | 1.62 |
| 8  | 8   | 3   | -0.88 | 1.23 |
| 7  | 2   | 9   | 0.17  | 1.30 |
| 10 | 0   | 5   | -0.81 | 1.21 |
| 2  | 8   | 9   | -1.08 | 1.28 |
| 7  | -2  | 9   | -0.11 | 1.39 |
| 11 | -1  | -2  | 0.60  | 1.48 |
| 10 | -4  | -4  | 1.30  | 1.19 |
| 10 | 4   | -4  | 0.24  | 1.44 |
| 11 | 1   | -2  | -0.22 | 1.44 |
| 8  | -8  | 3   | 0.17  | 1.46 |
| 5  | 11  | -2  | 0.32  | 1.29 |
| 5  | -11 | -2  | 0.54  | 1.59 |
| 2  | 10  | -7  | -1.52 | 1.46 |
| 6  | 10  | 3   | 0.59  | 1.35 |
| 5  | -10 | -5  | -0.25 | 1.50 |
| 2  | -8  | 9   | 0.61  | 0.93 |
| 3  | -12 | -1  | -0.31 | 1.36 |
| 5  | 6   | 9   | 3.53  | 0.74 |
| 3  | 12  | -1  | -4.11 | 1.61 |
| 0  | 2   | 12  | 1.23  | 0.92 |
| 0  | -2  | -12 | 1.37  | 1.43 |
| 5  | 10  | -5  | -1.59 | 1.52 |
| 6  | -10 | 3   | 1.43  | 1.39 |
| 11 | 2   | 0   | 3.29  | 1.17 |
| 2  | -5  | -11 | 2.13  | 1.58 |
| 0  | -2  | 12  | 1.08  | 0.97 |
| 0  | 2   | -12 | 0.26  | 1.49 |
| 6  | -1  | 10  | 3.87  | 0.81 |
| 11 | -2  | 0   | 2.28  | 1.07 |
| 6  | 1   | 10  | 3.67  | 0.75 |
| 5  | -1  | -11 | 1.95  | 1.43 |
| 4  | -10 | -6  | -1.46 | 1.50 |
| 9  | 7   | 2   | 0.37  | 1.35 |
| 5  | 1   | -11 | -1.79 | 1.66 |
| 5  | -6  | 9   | 3.00  | 0.75 |
| 2  | -1  | -12 | 1.24  | 1.20 |
| 10 | 5   | 2   | 1.89  | 1.46 |
| 2  | 5   | -11 | 5.03  | 0.87 |
| 1  | -2  | -12 | 3.32  | 0.74 |
| 9  | -7  | 2   | -1.44 | 1.54 |
| 9  | 5   | 5   | 3.71  | 1.23 |
| 1  | 7   | 10  | 0.30  | 1.33 |
| 11 | 2   | -1  | -1.51 | 1.49 |
| 2  | 1   | -12 | 1.56  | 1.30 |
| 4  | 10  | -6  | 0.46  | 1.43 |

|    |     |     |       |      |
|----|-----|-----|-------|------|
| 10 | -5  | 2   | 1.55  | 1.43 |
| 3  | 12  | 1   | 0.79  | 1.49 |
| 11 | -2  | -1  | 0.36  | 1.53 |
| 1  | 2   | -12 | 1.27  | 1.40 |
| 3  | -12 | 1   | 1.03  | 1.54 |
| 9  | -5  | 5   | 4.59  | 1.12 |
| 5  | 4   | 10  | 12.59 | 1.18 |
| 8  | 2   | 8   | 0.39  | 1.27 |
| 1  | -7  | 10  | 2.13  | 0.77 |
| 10 | 1   | 5   | -0.11 | 1.21 |
| 10 | -1  | 5   | 1.76  | 1.20 |
| 5  | -4  | 10  | 10.90 | 0.96 |
| 4  | -11 | -4  | -1.56 | 1.53 |
| 8  | -2  | 8   | 0.11  | 1.15 |
| 4  | 11  | -4  | 0.78  | 1.32 |
| 4  | 7   | 9   | -0.27 | 1.24 |
| 9  | 6   | 4   | 4.26  | 0.97 |
| 5  | 11  | 2   | 2.69  | 0.87 |
| 4  | -7  | 9   | 0.22  | 1.35 |
| 3  | 4   | 11  | -0.36 | 1.28 |
| 9  | -6  | 4   | 1.58  | 1.42 |
| 7  | -9  | -4  | -0.03 | 1.02 |
| 5  | -11 | 2   | 3.48  | 0.88 |
| 3  | -11 | -5  | -0.98 | 1.50 |
| 7  | 9   | -4  | 0.72  | 0.79 |
| 10 | -3  | -5  | 11.79 | 1.35 |
| 3  | -4  | 11  | 1.08  | 0.67 |
| 10 | 3   | -5  | 10.81 | 1.38 |
| 2  | 10  | 7   | 2.10  | 1.43 |
| 3  | 11  | -5  | 0.87  | 0.74 |
| 8  | 6   | 6   | 0.02  | 1.35 |
| 6  | -8  | -7  | -1.28 | 1.43 |
| 2  | -10 | 7   | 0.69  | 1.55 |
| 11 | 0   | 2   | -0.35 | 1.34 |
| 11 | 2   | 1   | -1.52 | 1.50 |
| 2  | -12 | -3  | 1.53  | 1.46 |
| 3  | -9  | -8  | 1.53  | 1.43 |
| 8  | -6  | 6   | 0.60  | 1.37 |
| 11 | -2  | 1   | 0.95  | 1.30 |
| 2  | -7  | -10 | 5.14  | 0.91 |
| 6  | 8   | -7  | -1.67 | 1.47 |
| 9  | -3  | -7  | 1.44  | 1.38 |
| 9  | 3   | -7  | 1.34  | 1.25 |
| 9  | 0   | 7   | 1.19  | 1.52 |
| 7  | 5   | 8   | 12.01 | 1.00 |
| 10 | -5  | -3  | 4.76  | 1.29 |
| 2  | 12  | -3  | 0.34  | 1.48 |
| 10 | 5   | -3  | 6.49  | 1.25 |
| 1  | 2   | 12  | -0.73 | 1.27 |
| 3  | 9   | -8  | -1.41 | 1.39 |
| 1  | -2  | 12  | 2.41  | 0.65 |
| 6  | -7  | -8  | 9.00  | 0.98 |
| 2  | 7   | -10 | 5.53  | 0.91 |
| 7  | -5  | 8   | 13.35 | 1.28 |
| 9  | 7   | -3  | 6.16  | 0.88 |
| 5  | -5  | -10 | -0.91 | 1.75 |
| 6  | 7   | -8  | 6.11  | 0.94 |
| 9  | -7  | -3  | 5.81  | 0.92 |

|    |     |     |       |      |
|----|-----|-----|-------|------|
| 5  | 5   | -10 | 2.12  | 0.87 |
| 7  | -4  | -9  | 0.69  | 1.48 |
| 8  | 7   | 5   | 0.83  | 0.96 |
| 7  | 4   | -9  | 0.52  | 1.38 |
| 4  | -6  | -10 | 2.51  | 1.03 |
| 7  | -7  | -7  | 2.02  | 1.72 |
| 11 | -2  | -2  | 3.67  | 1.13 |
| 2  | 12  | 3   | 3.47  | 1.01 |
| 11 | 2   | -2  | 3.61  | 1.15 |
| 3  | -8  | -9  | 2.05  | 1.75 |
| 8  | -7  | 5   | -0.96 | 1.01 |
| 7  | 7   | -7  | 3.06  | 0.93 |
| 2  | 0   | 12  | 3.14  | 0.80 |
| 0  | -11 | -6  | 1.26  | 1.33 |
| 0  | 11  | 6   | -0.79 | 1.39 |
| 11 | 1   | 2   | 3.38  | 1.02 |
| 4  | 6   | -10 | 0.49  | 1.60 |
| 11 | -1  | 2   | 5.81  | 1.10 |
| 4  | 11  | 4   | 0.77  | 1.27 |
| 3  | 8   | -9  | 3.02  | 0.83 |
| 2  | -12 | 3   | 1.80  | 1.77 |
| 3  | -12 | -2  | 1.66  | 1.25 |
| 0  | 11  | -6  | 0.01  | 1.30 |
| 0  | -11 | 6   | 0.34  | 1.39 |
| 3  | 12  | -2  | 0.01  | 0.99 |
| 8  | -8  | -4  | 4.30  | 0.82 |
| 8  | 8   | -4  | 0.53  | 1.55 |
| 9  | 1   | 7   | 7.65  | 1.22 |
| 9  | -1  | 7   | 7.91  | 1.19 |
| 6  | 2   | 10  | -0.56 | 1.41 |
| 4  | -11 | 4   | -1.54 | 1.58 |
| 5  | -2  | -11 | 6.06  | 0.99 |
| 11 | 0   | -3  | 8.64  | 1.91 |
| 6  | -2  | 10  | 0.96  | 1.50 |
| 2  | 5   | 11  | 3.40  | 0.80 |
| 5  | 2   | -11 | 4.36  | 1.08 |
| 2  | -2  | -12 | -0.08 | 1.36 |
| 2  | 2   | -12 | 0.90  | 1.38 |
| 2  | -5  | 11  | 0.21  | 1.55 |
| 8  | -4  | -8  | -0.56 | 1.44 |
| 5  | 10  | 5   | 1.63  | 1.21 |
| 10 | 0   | -6  | 1.06  | 1.70 |
| 8  | 4   | -8  | -3.22 | 1.47 |
| 3  | 11  | 5   | 2.69  | 0.73 |
| 6  | 5   | 9   | 1.05  | 1.45 |
| 9  | 4   | 6   | -0.24 | 1.33 |
| 4  | 10  | 6   | -0.81 | 1.43 |
| 1  | -11 | -6  | 0.35  | 1.51 |
| 10 | 2   | 5   | 1.31  | 1.23 |
| 5  | -10 | 5   | -2.32 | 1.52 |
| 3  | 12  | 2   | 4.38  | 0.92 |
| 10 | -2  | 5   | 3.66  | 0.87 |
| 6  | -5  | 9   | 1.28  | 1.44 |
| 2  | 1   | 12  | 2.00  | 0.82 |
| 9  | -4  | 6   | 0.96  | 1.41 |
| 2  | -1  | 12  | 2.10  | 1.41 |
| 3  | -11 | 5   | -0.90 | 1.41 |
| 1  | 11  | -6  | 2.57  | 0.79 |

|    |     |     |       |      |
|----|-----|-----|-------|------|
| 3  | -12 | 2   | 0.47  | 1.75 |
| 4  | -10 | 6   | 1.20  | 1.47 |
| 5  | -8  | -8  | -3.53 | 1.71 |
| 4  | 3   | 11  | -0.28 | 1.23 |
| 4  | -3  | 11  | 0.97  | 1.19 |
| 5  | 8   | -8  | 0.35  | 1.33 |
| 11 | 1   | -3  | 2.50  | 1.73 |
| 11 | -1  | -3  | 1.19  | 1.69 |
| 6  | -10 | -4  | 3.33  | 0.90 |
| 6  | 10  | -4  | 0.58  | 1.70 |
| 10 | -1  | -6  | 9.38  | 1.35 |
| 10 | 1   | -6  | 8.85  | 1.30 |
| 1  | 11  | 6   | 1.03  | 1.40 |
| 7  | -8  | -6  | -0.61 | 1.28 |
| 7  | 3   | 9   | 0.77  | 1.53 |
| 7  | 8   | -6  | 0.50  | 1.00 |
| 4  | -4  | -11 | 4.92  | 0.98 |
| 5  | -11 | -3  | 1.28  | 1.39 |
| 7  | -3  | 9   | 0.39  | 1.51 |
| 0  | -12 | -4  | -1.43 | 1.38 |
| 1  | -11 | 6   | 1.83  | 1.30 |
| 0  | 12  | 4   | -1.88 | 1.52 |
| 5  | 11  | -3  | 0.24  | 1.43 |
| 8  | 0   | -9  | 0.20  | 1.51 |
| 4  | 4   | -11 | 7.47  | 1.05 |
| 3  | 0   | -12 | -0.29 | 1.11 |
| 2  | 7   | 10  | 4.13  | 0.81 |
| 0  | 12  | -4  | -0.10 | 1.28 |
| 0  | -12 | 4   | 0.76  | 1.15 |
| 9  | -5  | -6  | 5.64  | 0.92 |
| 9  | -6  | -5  | -1.56 | 1.51 |
| 0  | -3  | -12 | 0.67  | 1.14 |
| 0  | 3   | 12  | -0.56 | 1.33 |
| 9  | 5   | -6  | 6.10  | 0.91 |
| 9  | 6   | -5  | 0.80  | 1.43 |
| 0  | -3  | 12  | 0.70  | 1.21 |
| 11 | 3   | 0   | 7.19  | 1.25 |
| 7  | -6  | -8  | 0.41  | 1.39 |
| 0  | 3   | -12 | -0.68 | 1.29 |
| 11 | -3  | 0   | 9.33  | 1.23 |
| 8  | 5   | 7   | 9.04  | 0.97 |
| 2  | -7  | 10  | 3.72  | 0.86 |
| 7  | 6   | -8  | -0.41 | 1.62 |
| 8  | -5  | 7   | 10.10 | 0.92 |
| 3  | -10 | -7  | 0.35  | 1.48 |
| 7  | 9   | 4   | 0.11  | 1.34 |
| 11 | 3   | -1  | 0.60  | 1.37 |
| 1  | -3  | -12 | 1.71  | 1.22 |
| 8  | 9   | 0   | 6.74  | 0.94 |
| 3  | 9   | 8   | 0.21  | 1.44 |
| 10 | 4   | 4   | -1.68 | 1.57 |
| 11 | -3  | -1  | 0.95  | 1.44 |
| 1  | 3   | -12 | 2.06  | 0.66 |
| 5  | -9  | -7  | 0.72  | 1.71 |
| 8  | -9  | 0   | 6.19  | 0.94 |
| 7  | 10  | 0   | -2.72 | 1.60 |
| 10 | -4  | 4   | 2.82  | 0.94 |
| 3  | 10  | -7  | 1.95  | 0.78 |

|    |     |     |       |      |
|----|-----|-----|-------|------|
| 7  | -9  | 4   | -0.81 | 1.29 |
| 8  | 3   | 8   | 0.73  | 0.87 |
| 6  | -9  | -6  | 2.81  | 0.94 |
| 7  | -10 | 0   | 0.95  | 1.42 |
| 3  | -5  | -11 | 1.14  | 1.42 |
| 10 | 6   | 0   | 4.72  | 1.18 |
| 6  | 9   | -6  | 3.21  | 0.83 |
| 3  | -9  | 8   | -0.85 | 1.59 |
| 1  | -12 | -4  | 1.22  | 1.29 |
| 8  | -3  | 8   | -0.18 | 1.28 |
| 5  | 9   | -7  | 1.04  | 1.47 |
| 3  | -1  | -12 | 1.84  | 1.27 |
| 10 | -6  | 0   | 2.81  | 1.16 |
| 3  | 5   | -11 | 0.25  | 1.64 |
| 3  | 1   | -12 | -0.81 | 1.33 |
| 8  | -1  | -9  | -0.75 | 1.57 |
| 8  | 9   | -1  | 1.95  | 1.44 |
| 1  | 12  | -4  | -0.95 | 1.42 |
| 8  | 1   | -9  | 1.11  | 1.00 |
| 11 | 2   | 2   | 0.84  | 1.35 |
| 8  | -9  | -1  | 2.15  | 0.86 |
| 11 | -2  | 2   | 0.12  | 1.31 |
| 10 | 6   | -1  | 4.86  | 1.26 |
| 10 | -6  | -1  | 9.23  | 1.26 |
| 9  | 2   | 7   | -0.48 | 1.39 |
| 7  | 10  | -1  | 2.65  | 0.86 |
| 7  | -10 | -1  | 0.12  | 1.61 |
| 9  | -2  | 7   | -3.10 | 1.39 |
| 7  | 0   | -10 | -2.38 | 1.53 |
| 9  | 7   | 3   | 3.65  | 1.17 |
| 1  | 12  | 4   | 2.62  | 0.90 |
| 9  | -7  | 3   | 1.99  | 1.66 |
| 10 | 5   | 3   | 3.74  | 1.10 |
| 6  | -4  | -10 | 1.51  | 1.48 |
| 10 | -5  | 3   | 4.32  | 1.10 |
| 1  | -12 | 4   | 2.12  | 1.45 |
| 5  | -7  | -9  | -2.04 | 1.82 |
| 3  | 8   | 9   | 1.19  | 0.91 |
| 6  | 4   | -10 | 0.58  | 1.56 |
| 2  | 2   | 12  | -0.85 | 1.31 |
| 5  | 7   | -9  | 1.07  | 1.43 |
| 6  | -6  | -9  | 1.18  | 1.47 |
| 5  | 11  | 3   | -1.95 | 1.60 |
| 3  | -8  | 9   | 0.64  | 1.26 |
| 2  | -2  | 12  | 1.07  | 1.13 |
| 6  | 6   | -9  | 0.59  | 1.55 |
| 11 | 3   | 1   | 1.69  | 0.94 |
| 7  | 10  | 1   | 1.36  | 1.31 |
| 11 | -3  | 1   | 0.36  | 1.57 |
| 5  | -11 | 3   | -1.88 | 1.59 |
| 8  | 9   | 1   | -1.10 | 1.43 |
| 2  | -11 | -6  | 1.48  | 0.99 |
| 8  | -9  | 1   | -0.91 | 1.55 |
| 1  | 3   | 12  | 1.28  | 0.79 |
| 7  | -1  | -10 | 1.60  | 0.82 |
| 5  | 0   | 11  | 8.39  | 0.86 |
| 7  | -10 | 1   | 1.38  | 1.44 |
| 1  | -3  | 12  | 1.60  | 1.26 |

|    |     |     |       |      |
|----|-----|-----|-------|------|
| 7  | 1   | -10 | 1.38  | 0.84 |
| 2  | 11  | -6  | -0.43 | 1.34 |
| 11 | -2  | -3  | 8.26  | 1.24 |
| 11 | 2   | -3  | 7.18  | 1.22 |
| 10 | 6   | 1   | 0.85  | 1.44 |
| 10 | 2   | -6  | -1.08 | 1.68 |
| 10 | -2  | -6  | -0.84 | 1.61 |
| 8  | 8   | 4   | 7.17  | 0.87 |
| 10 | -6  | 1   | -1.23 | 1.52 |
| 0  | 6   | 11  | 4.10  | 0.84 |
| 3  | -7  | -10 | 1.19  | 1.58 |
| 0  | -6  | -11 | 4.17  | 0.86 |
| 6  | 10  | 4   | -1.43 | 1.42 |
| 8  | -8  | 4   | 6.26  | 0.90 |
| 11 | -3  | -2  | 2.89  | 1.04 |
| 11 | 3   | -2  | 0.97  | 1.74 |
| 3  | 7   | -10 | 0.83  | 1.65 |
| 0  | 6   | -11 | 3.50  | 0.96 |
| 6  | 8   | 7   | -1.27 | 1.42 |
| 0  | -6  | 11  | 4.18  | 0.90 |
| 6  | -10 | 4   | 0.97  | 1.27 |
| 8  | -7  | -6  | 0.81  | 1.37 |
| 11 | 0   | 3   | 0.61  | 1.39 |
| 4  | 12  | 0   | -1.37 | 1.66 |
| 8  | 7   | -6  | 0.74  | 1.45 |
| 4  | -12 | 0   | -0.46 | 1.41 |
| 8  | -6  | -7  | 2.57  | 0.89 |
| 1  | -6  | -11 | 3.67  | 1.19 |
| 5  | 1   | 11  | -0.77 | 1.22 |
| 6  | 3   | 10  | 1.07  | 1.47 |
| 6  | -8  | 7   | 0.83  | 1.28 |
| 8  | 6   | -7  | 4.18  | 0.95 |
| 5  | -1  | 11  | 1.81  | 0.74 |
| 5  | -3  | -11 | -0.82 | 1.90 |
| 9  | 0   | -8  | -0.57 | 1.31 |
| 6  | -3  | 10  | 1.27  | 1.41 |
| 2  | -3  | -12 | -1.08 | 1.62 |
| 3  | 10  | 7   | -0.53 | 1.69 |
| 5  | 3   | -11 | 1.62  | 0.98 |
| 2  | 3   | -12 | -2.38 | 1.62 |
| 8  | 9   | -2  | 4.40  | 1.17 |
| 10 | 6   | -2  | 8.22  | 1.29 |
| 4  | 6   | 10  | 1.70  | 1.50 |
| 8  | -9  | -2  | 5.04  | 1.20 |
| 10 | -4  | -5  | -3.05 | 1.60 |
| 10 | -6  | -2  | 6.84  | 1.43 |
| 10 | 4   | -5  | 0.61  | 1.64 |
| 4  | -6  | 10  | 4.13  | 1.01 |
| 3  | -10 | 7   | 0.00  | 1.54 |
| 10 | 3   | 5   | 4.83  | 1.01 |
| 2  | 11  | 6   | 0.00  | 1.58 |
| 10 | -3  | 5   | 1.58  | 1.55 |
| 3  | -2  | -12 | 0.97  | 1.34 |
| 7  | 10  | -2  | 2.05  | 1.85 |
| 10 | -5  | -4  | 1.47  | 1.73 |
| 10 | 5   | -4  | 3.58  | 1.10 |
| 3  | 2   | -12 | -1.77 | 1.59 |
| 4  | -12 | -1  | 0.73  | 1.20 |

|    |     |     |       |      |
|----|-----|-----|-------|------|
| 4  | 12  | -1  | -2.31 | 1.88 |
| 8  | -2  | -9  | 6.68  | 1.30 |
| 7  | -10 | -2  | 3.71  | 1.24 |
| 8  | 2   | -9  | 4.37  | 1.31 |
| 2  | -11 | 6   | -0.29 | 1.75 |
| 11 | 1   | 3   | 3.98  | 1.15 |
| 11 | -1  | 3   | 5.43  | 1.14 |
| 9  | -4  | -7  | 0.00  | 1.69 |
| 9  | -7  | -4  | 1.65  | 1.74 |
| 9  | 4   | -7  | -0.12 | 1.66 |
| 9  | 7   | -4  | 1.65  | 1.65 |
| 2  | -12 | -4  | -0.84 | 1.61 |
| 6  | 7   | 8   | -2.95 | 1.75 |
| 9  | 1   | -8  | 1.22  | 1.54 |
| 9  | -1  | -8  | 1.22  | 1.59 |
| 3  | 12  | 3   | 1.45  | 1.80 |
| 4  | 12  | 1   | 1.16  | 1.86 |
| 2  | 12  | -4  | 1.37  | 1.60 |
| 6  | -7  | 8   | 2.61  | 1.06 |
| 4  | -12 | 1   | 0.29  | 1.98 |
| 3  | -12 | 3   | -0.29 | 1.74 |
| 5  | 5   | 10  | -3.54 | 1.53 |
| 1  | 6   | 11  | 1.72  | 1.45 |
| 5  | 8   | 8   | -2.61 | 1.79 |
| 5  | -5  | 10  | 1.64  | 1.36 |
| 7  | 7   | 7   | 2.16  | 1.15 |
| 9  | 8   | 0   | -0.76 | 1.55 |
| 11 | 0   | -4  | -0.24 | 1.68 |
| 9  | -8  | 0   | 0.89  | 1.54 |
| 1  | -6  | 11  | 0.92  | 1.54 |
| 3  | 0   | 12  | 0.85  | 1.47 |
| 4  | -11 | -5  | 4.88  | 1.39 |
| 5  | -8  | 8   | 1.95  | 1.79 |
| 7  | -7  | 7   | 0.64  | 1.67 |
| 4  | 11  | -5  | 6.82  | 1.26 |
| 6  | 11  | 0   | -1.14 | 1.78 |
| 7  | -2  | -10 | -0.87 | 1.79 |
| 6  | -11 | 0   | 2.10  | 1.67 |
| 7  | 2   | -10 | -0.01 | 1.65 |
| 9  | 8   | -1  | 3.88  | 1.14 |
| 9  | -8  | -1  | 5.30  | 1.28 |
| 4  | -9  | -8  | -0.78 | 1.77 |
| 2  | 12  | 4   | -1.33 | 1.88 |
| 0  | 9   | 9   | 1.62  | 1.45 |
| 3  | 5   | 11  | 3.71  | 1.07 |
| 0  | -9  | -9  | -1.10 | 1.69 |
| 7  | -9  | -5  | 1.67  | 1.15 |
| 7  | 9   | -5  | -1.14 | 1.57 |
| 2  | -12 | 4   | -1.62 | 1.72 |
| 7  | 8   | 6   | 1.37  | 1.43 |
| 5  | 9   | 7   | 3.42  | 1.28 |
| 4  | 9   | -8  | 2.57  | 1.01 |
| 3  | -5  | 11  | 4.52  | 1.08 |
| 0  | -9  | 9   | -0.01 | 1.64 |
| 0  | 9   | -9  | -1.21 | 1.62 |
| 6  | 9   | 6   | 2.92  | 1.08 |
| 7  | 10  | 2   | 0.38  | 1.63 |
| 8  | 9   | 2   | -0.40 | 1.56 |



|    |     |     |       |      |
|----|-----|-----|-------|------|
| 7  | -8  | 6   | -0.14 | 1.58 |
| 6  | 11  | -1  | 0.13  | 1.72 |
| 5  | -9  | 7   | 8.47  | 1.27 |
| 7  | -10 | 2   | 1.20  | 1.26 |
| 6  | -11 | -1  | 0.42  | 1.65 |
| 3  | 1   | 12  | 1.59  | 1.38 |
| 8  | -9  | 2   | 0.64  | 1.53 |
| 4  | -8  | -9  | 1.88  | 1.49 |
| 11 | -1  | -4  | -1.00 | 1.59 |
| 11 | 1   | -4  | -3.58 | 1.93 |
| 11 | 3   | 2   | 15.97 | 1.43 |
| 6  | -9  | 6   | -0.81 | 1.81 |
| 1  | -9  | -9  | 1.57  | 1.60 |
| 4  | 4   | 11  | 7.95  | 1.24 |
| 3  | -1  | 12  | 0.60  | 1.56 |
| 11 | -3  | 2   | 16.24 | 1.34 |
| 9  | 3   | 7   | 1.10  | 1.26 |
| 4  | 8   | -9  | 1.44  | 1.62 |
| 4  | -4  | 11  | 8.63  | 1.35 |
| 5  | 2   | 11  | 3.18  | 1.11 |
| 2  | -6  | -11 | 2.71  | 1.12 |
| 5  | -10 | -6  | -0.32 | 1.84 |
| 5  | -2  | 11  | 2.09  | 1.51 |
| 9  | -3  | 7   | 0.36  | 1.26 |
| 1  | 9   | -9  | -4.16 | 1.68 |
| 5  | 10  | -6  | -1.33 | 1.85 |
| 2  | 6   | -11 | 3.21  | 1.30 |
| 10 | 6   | 2   | 2.23  | 1.56 |
| 0  | 10  | 8   | -0.16 | 1.79 |
| 9  | 6   | 5   | -1.38 | 1.53 |
| 0  | -10 | -8  | -0.59 | 1.74 |
| 9  | 8   | 1   | 12.63 | 1.39 |
| 10 | -6  | 2   | 2.32  | 1.14 |
| 7  | -5  | -9  | 3.81  | 1.17 |
| 9  | -6  | 5   | 0.12  | 1.43 |
| 9  | -8  | 1   | 12.70 | 1.54 |
| 7  | 4   | 9   | 2.40  | 1.00 |
| 6  | 11  | 1   | 0.27  | 1.79 |
| 4  | -12 | -2  | -1.05 | 1.57 |
| 7  | 5   | -9  | 0.67  | 1.70 |
| 0  | -10 | 8   | 1.77  | 1.36 |
| 4  | 12  | -2  | -0.59 | 1.52 |
| 0  | 10  | -8  | 1.55  | 1.17 |
| 7  | -4  | 9   | -0.14 | 1.56 |
| 2  | 3   | 12  | -0.38 | 1.36 |
| 6  | -11 | 1   | 5.90  | 1.30 |
| 5  | -11 | -4  | 1.49  | 1.98 |
| 2  | -3  | 12  | -2.29 | 1.46 |
| 3  | 7   | 10  | -0.63 | 1.47 |
| 5  | 11  | -4  | 3.43  | 1.23 |
| 0  | -4  | -12 | 2.07  | 1.40 |
| 8  | -8  | -5  | 1.41  | 1.55 |
| 0  | 4   | 12  | 2.07  | 1.46 |
| 11 | 2   | 3   | -0.26 | 1.48 |
| 8  | 8   | -5  | 1.20  | 1.60 |
| 11 | -2  | 3   | -1.12 | 1.43 |
| 1  | -10 | -8  | -0.91 | 1.56 |
| 10 | 0   | 6   | 2.77  | 1.11 |

|    |     |     |       |      |
|----|-----|-----|-------|------|
| 11 | 4   | 0   | 0.98  | 1.50 |
| 11 | -4  | 0   | 3.08  | 1.03 |
| 3  | -7  | 10  | -0.01 | 1.37 |
| 0  | -4  | 12  | -0.27 | 1.40 |
| 0  | 4   | -12 | 0.25  | 1.42 |
| 1  | 9   | 9   | 2.71  | 1.23 |
| 11 | 3   | -3  | -1.75 | 1.68 |
| 9  | -2  | -8  | 5.91  | 1.29 |
| 6  | 0   | -11 | 1.39  | 1.07 |
| 9  | 2   | -8  | 3.94  | 1.27 |
| 11 | -3  | -3  | -1.25 | 1.58 |
| 11 | 4   | -1  | -0.88 | 1.49 |
| 1  | -4  | -12 | 7.97  | 1.31 |
| 1  | 10  | -8  | 1.01  | 1.44 |
| 8  | -5  | -8  | 0.87  | 1.42 |
| 11 | -4  | -1  | 1.10  | 1.53 |
| 10 | -3  | -6  | -0.14 | 1.92 |
| 10 | 3   | -6  | 0.73  | 1.85 |
| 1  | 4   | -12 | 6.52  | 1.32 |
| 1  | -9  | 9   | 1.88  | 1.90 |
| 8  | 5   | -8  | 1.03  | 1.67 |
| 8  | 4   | 8   | -0.13 | 1.45 |
| 9  | 5   | 6   | 1.10  | 1.74 |
| 8  | -4  | 8   | 2.06  | 0.98 |
| 4  | 0   | -12 | 2.18  | 1.56 |
| 9  | 8   | -2  | 0.38  | 1.44 |
| 4  | 11  | 5   | 5.06  | 1.29 |
| 4  | 12  | 2   | -4.41 | 1.80 |
| 9  | -5  | 6   | 3.71  | 1.11 |
| 9  | -8  | -2  | -1.43 | 1.56 |
| 3  | -11 | -6  | -3.07 | 1.84 |
| 0  | -13 | 0   | -1.26 | 1.68 |
| 0  | 13  | 0   | -0.29 | 1.68 |
| 4  | -12 | 2   | 1.33  | 1.69 |
| 4  | -11 | 5   | 5.85  | 1.37 |
| 5  | 7   | 9   | 0.99  | 1.27 |
| 7  | 6   | 8   | 0.49  | 1.10 |
| 3  | 11  | -6  | 1.97  | 1.52 |
| 10 | 6   | -3  | 3.15  | 1.29 |
| 10 | -6  | -3  | 3.84  | 1.28 |
| 10 | -1  | 6   | 9.59  | 1.19 |
| 10 | 1   | 6   | 5.84  | 1.25 |
| 8  | -9  | -3  | 1.84  | 1.57 |
| 1  | 10  | 8   | 0.96  | 1.88 |
| 8  | 9   | -3  | -3.95 | 1.80 |
| 6  | 1   | -11 | -0.15 | 1.73 |
| 7  | -6  | 8   | 0.63  | 1.47 |
| 6  | -1  | -11 | 0.73  | 1.55 |
| 5  | -7  | 9   | -0.53 | 1.54 |
| 5  | -6  | -10 | 1.74  | 2.03 |
| 0  | 8   | 10  | 4.12  | 1.13 |
| 6  | -10 | -5  | 0.72  | 1.98 |
| 0  | -8  | -10 | 0.51  | 1.63 |
| 1  | -10 | 8   | 4.34  | 1.16 |
| 6  | 10  | -5  | 1.62  | 1.77 |
| 5  | 6   | -10 | 3.20  | 1.24 |
| 6  | 11  | -2  | -0.74 | 1.64 |
| 7  | 10  | -3  | 2.40  | 1.90 |

|    |     |     |       |      |
|----|-----|-----|-------|------|
| 6  | -11 | -2  | 1.15  | 1.57 |
| 7  | -10 | -3  | 3.10  | 1.30 |
| 4  | -5  | -11 | 2.16  | 1.96 |
| 3  | -3  | -12 | 8.12  | 1.24 |
| 0  | 8   | -10 | 1.76  | 1.95 |
| 0  | -8  | 10  | 2.65  | 1.92 |
| 4  | -1  | -12 | 5.71  | 1.13 |
| 4  | -10 | -7  | 1.50  | 1.81 |
| 4  | 5   | -11 | 0.92  | 1.99 |
| 8  | -3  | -9  | 1.11  | 1.91 |
| 4  | 1   | -12 | 3.52  | 1.21 |
| 3  | 3   | -12 | 8.04  | 1.36 |
| 11 | 2   | -4  | 6.97  | 1.30 |
| 8  | 3   | -9  | 3.05  | 1.25 |
| 11 | 4   | 1   | 1.12  | 1.39 |
| 11 | -2  | -4  | 5.60  | 1.32 |
| 3  | 2   | 12  | 0.73  | 1.61 |
| 0  | 13  | 1   | 1.66  | 1.49 |
| 4  | 10  | -7  | 0.86  | 1.74 |
| 0  | -13 | -1  | 0.69  | 1.52 |
| 0  | -13 | 1   | 1.93  | 1.71 |
| 0  | 13  | -1  | 1.79  | 1.64 |
| 3  | -2  | 12  | 0.86  | 1.57 |
| 1  | -8  | -10 | -1.92 | 1.52 |
| 11 | -4  | 1   | -0.51 | 1.51 |
| 1  | 4   | 12  | -0.01 | 1.45 |
| 1  | 13  | 0   | 3.41  | 1.11 |
| 2  | -9  | -9  | 1.82  | 1.87 |
| 9  | 7   | 4   | 1.50  | 1.42 |
| 1  | -13 | 0   | 1.52  | 1.56 |
| 0  | -12 | -5  | 0.29  | 1.46 |
| 0  | 12  | 5   | 1.31  | 1.59 |
| 1  | -4  | 12  | 2.31  | 1.05 |
| 2  | 6   | 11  | 0.86  | 1.30 |
| 1  | 8   | -10 | 0.91  | 1.44 |
| 2  | 9   | -9  | 1.75  | 1.65 |
| 10 | 5   | 4   | 2.25  | 1.66 |
| 9  | -7  | 4   | 0.18  | 1.08 |
| 0  | 12  | -5  | 0.42  | 1.45 |
| 0  | -12 | 5   | -1.29 | 1.45 |
| 2  | -6  | 11  | -1.59 | 1.51 |
| 5  | 11  | 4   | 7.01  | 1.34 |
| 6  | 6   | 9   | 1.49  | 1.30 |
| 10 | -5  | 4   | 4.61  | 1.10 |
| 8  | 7   | 6   | 5.97  | 1.26 |
| 6  | -6  | 9   | -1.56 | 1.62 |
| 11 | 4   | -2  | 5.00  | 1.29 |
| 11 | -4  | -2  | 6.24  | 1.34 |
| 5  | -11 | 4   | 5.39  | 1.32 |
| 4  | 9   | 8   | 1.15  | 1.84 |
| 8  | -7  | 6   | 6.46  | 1.29 |
| 1  | -13 | -1  | -0.29 | 1.63 |
| 6  | 4   | 10  | 1.87  | 1.39 |
| 4  | -9  | 8   | 5.30  | 1.27 |
| 1  | -12 | -5  | -0.59 | 1.57 |
| 7  | -3  | -10 | 6.54  | 1.51 |
| 5  | -4  | -11 | -0.98 | 1.96 |
| 3  | -12 | -4  | 2.88  | 1.21 |

|    |     |     |       |      |
|----|-----|-----|-------|------|
| 1  | 13  | -1  | 1.67  | 0.94 |
| 8  | 0   | 9   | -0.63 | 1.31 |
| 6  | 11  | 2   | -0.71 | 1.62 |
| 2  | -4  | -12 | -0.38 | 1.48 |
| 2  | -10 | -8  | 0.90  | 1.67 |
| 9  | 8   | 2   | 0.89  | 1.55 |
| 6  | -4  | 10  | -0.90 | 1.58 |
| 7  | 3   | -10 | 10.46 | 1.45 |
| 1  | 13  | 1   | -0.44 | 1.64 |
| 5  | 4   | -11 | -0.34 | 1.99 |
| 1  | 12  | -5  | -2.10 | 1.35 |
| 3  | 12  | -4  | 1.12  | 1.57 |
| 7  | 9   | 5   | 1.03  | 1.43 |
| 1  | -13 | 1   | 1.39  | 1.52 |
| 1  | 8   | 10  | -0.79 | 1.60 |
| 3  | 11  | 6   | -0.02 | 1.90 |
| 5  | 10  | 6   | -0.54 | 1.64 |
| 9  | -8  | 2   | -0.92 | 1.59 |
| 6  | -11 | 2   | 0.42  | 1.22 |
| 6  | -5  | -10 | 3.18  | 1.12 |
| 2  | 4   | -12 | -1.00 | 1.58 |
| 2  | 10  | -8  | -1.45 | 1.39 |
| 6  | 5   | -10 | 1.57  | 1.27 |
| 7  | -9  | 5   | 0.66  | 1.47 |
| 1  | -8  | 10  | -0.58 | 1.61 |
| 5  | -10 | 6   | 1.81  | 1.65 |
| 3  | -11 | 6   | 1.03  | 1.72 |
| 10 | 4   | 5   | 1.50  | 1.41 |
| 4  | -7  | -10 | 0.48  | 2.03 |
| 1  | 12  | 5   | 2.09  | 1.44 |
| 10 | -4  | 5   | 0.87  | 1.02 |
| 9  | -6  | -6  | 2.57  | 1.26 |
| 4  | 7   | -10 | 0.14  | 1.89 |
| 10 | 2   | 6   | 0.62  | 1.34 |
| 4  | 8   | 9   | 0.25  | 1.41 |
| 9  | 6   | -6  | 2.79  | 1.17 |
| 1  | -12 | 5   | -1.47 | 1.58 |
| 10 | -2  | 6   | 2.37  | 0.90 |
| 5  | 3   | 11  | -1.26 | 1.57 |
| 8  | 6   | 7   | 1.88  | 1.47 |
| 8  | 1   | 9   | 2.70  | 0.94 |
| 11 | 0   | 4   | -1.65 | 1.30 |
| 8  | -1  | 9   | 1.87  | 1.35 |
| 7  | 0   | 10  | -0.64 | 1.41 |
| 6  | -2  | -11 | 7.11  | 1.42 |
| 5  | -3  | 11  | 0.88  | 1.46 |
| 6  | 2   | -11 | 5.85  | 1.42 |
| 8  | -6  | 7   | 0.25  | 1.69 |
| 4  | -8  | 9   | 1.48  | 1.03 |
| 7  | 10  | 3   | 1.33  | 1.60 |
| 10 | 0   | -7  | 0.36  | 1.64 |
| 8  | 9   | 3   | 1.69  | 1.44 |
| 0  | -11 | -7  | 0.44  | 2.01 |
| 0  | 11  | 7   | 0.59  | 1.84 |
| 3  | -6  | -11 | 1.40  | 1.61 |
| 7  | -10 | 3   | 2.04  | 1.73 |
| 4  | -2  | -12 | 1.12  | 1.52 |
| 4  | -12 | -3  | -2.27 | 1.63 |

|    |     |     |       |      |
|----|-----|-----|-------|------|
| 2  | 9   | 9   | 1.05  | 1.67 |
| 8  | -9  | 3   | -0.14 | 1.39 |
| 4  | 12  | -3  | 0.72  | 1.68 |
| 0  | -11 | 7   | 3.39  | 1.14 |
| 4  | 2   | -12 | -2.06 | 1.80 |
| 3  | 6   | -11 | 0.45  | 1.77 |
| 0  | 11  | -7  | 0.28  | 1.79 |
| 3  | 12  | 4   | 1.63  | 1.96 |
| 2  | -9  | 9   | 2.45  | 1.10 |
| 11 | 3   | 3   | 0.50  | 1.54 |
| 2  | -8  | -10 | 1.61  | 1.64 |
| 11 | -3  | 3   | -0.39 | 1.67 |
| 0  | 13  | 2   | -0.15 | 1.51 |
| 0  | -13 | -2  | -1.15 | 1.76 |
| 3  | -12 | 4   | 2.70  | 1.88 |
| 0  | 13  | -2  | 1.39  | 1.48 |
| 0  | -13 | 2   | 1.95  | 1.47 |
| 11 | 1   | 4   | -0.77 | 1.43 |
| 11 | -1  | 4   | 3.71  | 0.94 |
| 9  | -3  | -8  | -0.40 | 1.98 |
| 7  | 1   | 10  | 1.00  | 1.59 |
| 7  | -1  | 10  | 0.36  | 1.64 |
| 6  | -8  | -8  | -0.01 | 1.85 |
| 9  | 3   | -8  | 0.49  | 1.81 |
| 10 | 6   | 3   | 1.78  | 1.22 |
| 2  | 8   | -10 | 0.30  | 1.60 |
| 1  | -11 | -7  | 0.90  | 1.78 |
| 9  | -8  | -3  | -0.41 | 1.46 |
| 9  | 8   | -3  | -0.28 | 1.55 |
| 6  | 8   | -8  | -0.78 | 1.84 |
| 10 | -6  | 3   | -1.17 | 1.40 |
| 10 | 1   | -7  | 1.62  | 1.86 |
| 10 | -1  | -7  | 2.75  | 1.87 |
| 10 | 5   | -5  | 10.38 | 1.38 |
| 10 | -5  | -5  | 10.90 | 1.50 |
| 2  | 10  | 8   | 1.91  | 1.57 |
| 1  | 11  | -7  | 0.42  | 1.53 |
| 8  | 8   | 5   | -0.28 | 1.47 |
| 6  | 10  | 5   | 2.25  | 1.79 |
| 4  | 10  | 7   | 0.11  | 1.63 |
| 7  | -8  | -7  | 6.41  | 1.31 |
| 8  | -8  | 5   | -1.48 | 1.62 |
| 7  | 8   | -7  | 6.70  | 1.25 |
| 2  | -10 | 8   | 1.02  | 1.68 |
| 11 | 4   | 2   | 0.49  | 1.52 |
| 6  | -10 | 5   | 4.29  | 1.27 |
| 2  | -13 | 0   | -0.74 | 1.17 |
| 2  | 13  | 0   | 0.27  | 1.59 |
| 9  | 7   | -5  | 6.35  | 1.31 |
| 9  | 4   | 7   | -0.15 | 1.46 |
| 4  | -10 | 7   | 1.27  | 1.63 |
| 9  | -5  | -7  | -0.03 | 1.72 |
| 11 | -4  | 2   | -0.65 | 1.43 |
| 9  | -7  | -5  | 5.03  | 1.49 |
| 7  | -7  | -8  | -0.43 | 1.83 |
| 9  | 5   | -7  | -0.68 | 1.76 |
| 1  | -13 | -2  | 1.68  | 1.09 |
| 9  | -4  | 7   | 0.62  | 1.40 |

|    |     |    |       |      |
|----|-----|----|-------|------|
| 7  | 7   | -8 | 0.12  | 1.79 |
| 4  | 12  | 3  | 3.98  | 1.30 |
| 1  | 11  | 7  | -1.36 | 1.73 |
| 1  | 13  | -2 | 0.69  | 1.08 |
| 6  | -11 | -3 | 1.70  | 1.17 |
| 6  | 11  | -3 | -1.23 | 1.79 |
| 2  | -12 | -5 | 0.42  | 1.54 |
| 4  | -12 | 3  | 1.71  | 1.45 |
| 1  | 13  | 2  | 3.01  | 2.12 |
| 9  | 0   | 8  | -0.15 | 1.55 |
| 1  | -13 | 2  | 3.97  | 1.22 |
| 1  | -11 | 7  | -0.18 | 1.74 |
| 11 | 0   | -5 | 11.29 | 1.47 |
| 10 | 7   | 0  | 0.62  | 1.58 |
| 2  | 4   | 12 | -0.90 | 1.48 |
| 2  | 12  | -5 | 2.11  | 1.58 |
| 10 | -7  | 0  | 0.90  | 1.41 |
| 2  | 13  | -1 | 2.34  | 1.12 |
| 11 | -3  | -4 | -5.12 | 1.95 |
| 3  | 3   | 12 | 0.11  | 1.39 |
| 6  | -9  | -7 | 0.20  | 1.26 |
| 11 | 3   | -4 | 0.23  | 1.63 |
| 2  | -13 | -1 | -0.74 | 1.80 |
| 2  | -4  | 12 | -0.41 | 1.46 |
| 3  | -3  | 12 | -0.54 | 1.50 |
| 6  | 9   | -7 | 3.26  | 1.17 |
| 10 | 7   | -1 | -0.68 | 1.72 |
| 2  | 13  | 1  | 3.93  | 1.35 |
| 10 | -7  | -1 | 1.03  | 1.52 |
| 8  | 2   | 9  | -0.40 | 1.42 |
| 2  | -13 | 1  | 4.85  | 1.32 |
| 8  | -2  | 9  | -2.18 | 1.62 |
| 11 | -4  | -3 | -1.94 | 1.64 |
| 11 | 4   | -3 | -0.28 | 1.59 |
| 5  | 12  | 0  | 1.93  | 1.78 |
| 10 | -4  | -6 | 0.23  | 1.60 |
| 10 | 4   | -6 | -3.37 | 1.80 |
| 5  | -12 | 0  | 0.43  | 1.96 |
| 11 | 1   | -5 | 3.09  | 1.18 |
| 9  | 1   | 8  | 0.75  | 1.47 |
| 11 | -1  | -5 | 2.40  | 1.20 |
| 9  | -1  | 8  | 1.76  | 1.33 |
| 4  | 0   | 12 | 12.29 | 1.38 |
| 10 | -6  | -4 | 5.63  | 1.26 |
| 3  | -9  | -9 | 1.72  | 1.86 |
| 10 | 6   | -4 | 0.36  | 1.96 |
| 6  | -7  | -9 | 1.52  | 1.18 |
| 2  | 8   | 10 | 1.56  | 1.28 |
| 2  | 12  | 5  | 4.00  | 1.16 |
| 4  | 5   | 11 | -1.30 | 1.63 |
| 8  | -9  | -4 | 2.15  | 1.78 |
| 5  | 12  | -1 | 1.05  | 1.30 |
| 6  | 7   | -9 | 1.07  | 1.53 |
| 3  | 9   | -9 | 1.76  | 1.62 |
| 8  | 9   | -4 | 0.96  | 1.55 |
| 5  | -12 | -1 | 1.05  | 1.65 |
| 4  | -5  | 11 | 1.31  | 1.44 |
| 11 | 2   | 4  | 5.89  | 1.08 |

|    |     |     |       |      |
|----|-----|-----|-------|------|
| 7  | 2   | 10  | 0.74  | 1.69 |
| 2  | -8  | 10  | -0.02 | 1.43 |
| 11 | -2  | 4   | 3.48  | 1.14 |
| 2  | -12 | 5   | 2.40  | 1.92 |
| 7  | -2  | 10  | 1.58  | 1.02 |
| 10 | -2  | -7  | 1.77  | 1.58 |
| 10 | 7   | 1   | -0.67 | 1.63 |
| 7  | -10 | -4  | 8.58  | 1.45 |
| 10 | 2   | -7  | -0.92 | 1.59 |
| 5  | 6   | 10  | 2.02  | 1.70 |
| 7  | 10  | -4  | 6.48  | 1.40 |
| 10 | -7  | 1   | -0.02 | 1.62 |
| 2  | -11 | -7  | 1.04  | 1.87 |
| 7  | 5   | 9   | 1.13  | 1.52 |
| 0  | 7   | 11  | 0.63  | 1.60 |
| 0  | -7  | -11 | 1.42  | 1.09 |
| 4  | 1   | 12  | 0.62  | 1.40 |
| 4  | -1  | 12  | 2.15  | 1.50 |
| 3  | -4  | -12 | 0.24  | 1.39 |
| 5  | -6  | 10  | 0.25  | 1.43 |
| 5  | 12  | 1   | 0.88  | 1.65 |
| 8  | -4  | -9  | 5.32  | 1.48 |
| 7  | -5  | 9   | 1.81  | 1.65 |
| 6  | 11  | 3   | 5.00  | 1.26 |
| 2  | 11  | -7  | 4.54  | 1.13 |
| 8  | 4   | -9  | 4.85  | 1.34 |
| 5  | -12 | 1   | -0.79 | 1.72 |
| 3  | 4   | -12 | 0.59  | 1.58 |
| 0  | -7  | 11  | -0.46 | 1.74 |
| 0  | 7   | -11 | 2.68  | 1.09 |
| 5  | -11 | -5  | -2.38 | 1.98 |
| 0  | -5  | -12 | 1.12  | 1.58 |
| 0  | 5   | 12  | 0.61  | 1.56 |
| 3  | -10 | -8  | 3.15  | 1.29 |
| 5  | 11  | -5  | 1.48  | 1.76 |
| 5  | -9  | -8  | 1.08  | 2.07 |
| 10 | 3   | 6   | 0.11  | 1.38 |
| 1  | -7  | -11 | 1.86  | 1.55 |
| 6  | -11 | 3   | 5.34  | 1.32 |
| 11 | 5   | 0   | 3.78  | 1.20 |
| 0  | -5  | 12  | -2.62 | 1.77 |
| 11 | -5  | 0   | 4.95  | 1.17 |
| 0  | 5   | -12 | -0.84 | 1.67 |
| 10 | -3  | 6   | -0.15 | 1.40 |
| 9  | 8   | 3   | 2.72  | 1.94 |
| 8  | -7  | -7  | 0.91  | 1.60 |
| 5  | 9   | -8  | -0.02 | 1.58 |
| 3  | 10  | -8  | 2.02  | 1.94 |
| 8  | 7   | -7  | -0.02 | 1.49 |
| 4  | -11 | -6  | -1.04 | 1.89 |
| 6  | -3  | -11 | -0.41 | 1.65 |
| 3  | 6   | 11  | 1.93  | 1.45 |
| 11 | 5   | -1  | 1.40  | 1.64 |
| 1  | 7   | -11 | 0.59  | 1.87 |
| 9  | -8  | 3   | 5.31  | 1.33 |
| 6  | 3   | -11 | 0.74  | 1.82 |
| 1  | -5  | -12 | -0.87 | 1.62 |
| 11 | -5  | -1  | 3.44  | 1.13 |

|    |     |     |       |      |
|----|-----|-----|-------|------|
| 4  | 7   | 10  | 1.82  | 1.35 |
| 4  | 11  | -6  | 1.01  | 1.67 |
| 7  | -9  | -6  | 0.73  | 1.16 |
| 10 | -7  | -2  | -1.82 | 1.85 |
| 10 | 7   | -2  | -3.13 | 1.61 |
| 3  | -6  | 11  | 0.29  | 1.71 |
| 8  | 5   | 8   | 0.92  | 1.51 |
| 5  | -8  | -9  | 2.61  | 1.88 |
| 1  | 5   | -12 | 0.44  | 1.49 |
| 4  | -3  | -12 | -0.23 | 1.63 |
| 7  | 9   | -6  | 1.66  | 1.63 |
| 8  | -5  | 8   | -1.16 | 1.59 |
| 4  | -7  | 10  | 0.70  | 1.54 |
| 4  | 3   | -12 | -0.30 | 1.83 |
| 5  | 8   | -9  | 2.02  | 1.64 |
| 6  | 0   | 11  | -0.11 | 1.36 |
| 2  | -13 | -2  | 1.03  | 1.50 |
| 2  | 13  | -2  | 0.02  | 1.72 |
| 7  | -4  | -10 | -0.10 | 1.76 |
| 7  | 4   | -10 | 0.73  | 1.79 |
| 2  | 13  | 2   | 1.97  | 1.76 |
| 0  | -13 | -3  | -0.12 | 1.77 |
| 0  | 13  | 3   | -0.56 | 1.76 |
| 0  | 0   | -13 | -0.50 | 1.38 |
| 0  | 13  | -3  | 1.16  | 1.57 |
| 2  | -13 | 2   | -0.42 | 1.79 |
| 0  | -13 | 3   | -1.12 | 1.62 |
| 0  | 0   | 13  | 1.43  | 1.47 |
| 3  | -8  | -10 | 0.67  | 2.00 |
| 7  | -6  | -9  | 1.50  | 1.43 |
| 2  | 11  | 7   | 0.89  | 1.39 |
| 9  | 2   | 8   | 1.89  | 0.89 |
| 11 | 2   | -5  | 3.31  | 1.22 |
| 11 | -2  | -5  | 3.77  | 1.26 |
| 9  | -2  | 8   | -0.88 | 1.32 |
| 1  | 7   | 11  | 3.03  | 1.30 |
| 7  | 6   | -9  | -0.42 | 1.63 |
| 1  | 0   | -13 | 4.48  | 1.16 |
| 6  | 1   | 11  | 0.28  | 1.62 |
| 6  | -1  | 11  | 1.18  | 1.70 |
| 5  | -12 | -2  | 0.49  | 1.72 |
| 2  | -11 | 7   | -1.67 | 1.78 |
| 5  | 12  | -2  | -1.20 | 1.70 |
| 3  | 8   | -10 | 0.78  | 1.58 |
| 1  | -7  | 11  | -0.53 | 2.00 |
| 11 | 5   | 1   | -1.79 | 1.79 |
| 8  | -8  | -6  | 5.17  | 1.32 |
| 11 | -5  | 1   | 1.71  | 1.36 |
| 5  | 4   | 11  | -0.88 | 1.50 |
| 1  | 5   | 12  | 3.61  | 1.19 |
| 8  | 8   | -6  | 7.49  | 1.25 |
| 5  | -4  | 11  | -0.11 | 1.61 |
| 5  | 0   | -12 | 0.75  | 1.35 |
| 1  | -5  | 12  | 5.60  | 1.17 |
| 1  | -13 | -3  | 1.18  | 1.48 |
| 8  | -6  | -8  | 4.82  | 1.22 |
| 0  | -1  | -13 | 0.28  | 1.56 |
| 0  | 1   | 13  | 1.44  | 1.45 |



|    |     |     |       |      |
|----|-----|-----|-------|------|
| 8  | 6   | -8  | 6.08  | 1.12 |
| 0  | 1   | -13 | 0.02  | 1.56 |
| 0  | -1  | 13  | 1.45  | 1.38 |
| 1  | 13  | -3  | 1.45  | 1.51 |
| 3  | 9   | 9   | 1.51  | 1.82 |
| 4  | 2   | 12  | 3.25  | 1.16 |
| 4  | -2  | 12  | 3.33  | 1.18 |
| 9  | 6   | 6   | -0.37 | 1.51 |
| 4  | -12 | -4  | -0.59 | 1.64 |
| 1  | 1   | -13 | -0.12 | 1.19 |
| 11 | 5   | -2  | 1.20  | 1.67 |
| 1  | -1  | -13 | -2.70 | 1.60 |
| 1  | 13  | 3   | -2.20 | 2.05 |
| 11 | -5  | -2  | 1.45  | 1.56 |
| 9  | -6  | 6   | 1.35  | 1.48 |
| 4  | 12  | -4  | -1.61 | 1.59 |
| 3  | -9  | 9   | 2.05  | 1.74 |
| 11 | 4   | 3   | -1.28 | 1.50 |
| 1  | -13 | 3   | 3.75  | 1.25 |
| 11 | -4  | 3   | -1.02 | 1.41 |
| 6  | 5   | 10  | -0.62 | 1.56 |
| 2  | -7  | -11 | -1.66 | 1.82 |
| 8  | 3   | 9   | 9.55  | 1.32 |
| 6  | 8   | 8   | 7.92  | 1.46 |
| 5  | -5  | -11 | -0.15 | 2.03 |
| 9  | -8  | -4  | 0.30  | 1.73 |
| 9  | 8   | -4  | 0.57  | 1.64 |
| 5  | -1  | -12 | 1.87  | 2.15 |
| 3  | -13 | 0   | 4.52  | 1.27 |
| 5  | 1   | -12 | -0.86 | 2.24 |
| 2  | -5  | -12 | -0.50 | 1.61 |
| 3  | 13  | 0   | 1.52  | 1.85 |
| 9  | -4  | -8  | 6.14  | 1.45 |
| 5  | 12  | 2   | 4.18  | 1.23 |
| 8  | -3  | 9   | 10.87 | 1.29 |
| 6  | -5  | 10  | -2.24 | 1.67 |
| 10 | 7   | 2   | 3.90  | 1.17 |
| 9  | 4   | -8  | 8.17  | 1.34 |
| 5  | 5   | -11 | -2.09 | 1.86 |
| 8  | 0   | -10 | 5.12  | 1.17 |
| 8  | 10  | 0   | 1.70  | 1.54 |
| 2  | 7   | -11 | -2.19 | 1.89 |
| 9  | 7   | 5   | 7.17  | 1.29 |
| 7  | 10  | 4   | 3.98  | 1.03 |
| 5  | -12 | 2   | 3.56  | 1.28 |
| 10 | -7  | 2   | 0.57  | 1.84 |
| 5  | 11  | 5   | -1.25 | 1.72 |
| 3  | 10  | 8   | 0.99  | 1.01 |
| 2  | 5   | -12 | -4.66 | 1.77 |
| 6  | -8  | 8   | 7.43  | 1.34 |
| 5  | -10 | -7  | -1.24 | 1.93 |
| 8  | 9   | 4   | 0.16  | 1.68 |
| 3  | -12 | -5  | 0.77  | 1.62 |
| 8  | -10 | 0   | 1.57  | 1.75 |
| 7  | -10 | 4   | 2.58  | 1.36 |
| 9  | -7  | 5   | 7.94  | 1.36 |
| 6  | -10 | -6  | 1.12  | 1.87 |
| 4  | -6  | -11 | 0.86  | 2.07 |

|    |     |     |       |      |
|----|-----|-----|-------|------|
| 1  | 0   | 13  | 1.44  | 1.48 |
| 10 | 5   | 5   | -0.36 | 1.79 |
| 3  | 12  | -5  | -1.15 | 1.54 |
| 4  | 11  | 6   | 0.67  | 1.12 |
| 5  | -11 | 5   | 1.37  | 1.94 |
| 6  | 10  | -6  | 0.33  | 1.23 |
| 3  | -10 | 8   | 0.77  | 1.59 |
| 7  | 8   | 7   | 3.98  | 1.17 |
| 5  | 10  | -7  | 1.70  | 1.62 |
| 8  | -9  | 4   | -1.77 | 1.75 |
| 6  | 9   | 7   | -0.51 | 1.58 |
| 10 | -5  | 5   | 5.36  | 1.11 |
| 4  | 6   | -11 | 0.98  | 1.87 |
| 8  | 10  | -1  | 0.16  | 1.48 |
| 4  | -11 | 6   | 1.99  | 1.66 |
| 8  | -10 | -1  | 1.56  | 1.37 |
| 7  | -8  | 7   | 4.66  | 1.21 |
| 12 | 0   | 0   | -0.11 | 1.42 |
| 3  | -13 | -1  | 1.37  | 1.88 |
| 3  | 13  | -1  | 1.95  | 1.15 |
| 6  | -9  | 7   | -1.52 | 1.58 |
| 7  | 3   | 10  | 10.61 | 1.45 |
| 11 | 3   | 4   | 3.42  | 1.18 |
| 12 | 0   | -1  | -3.38 | 1.71 |
| 11 | -3  | 4   | 4.50  | 1.24 |
| 7  | -3  | 10  | 11.91 | 1.45 |
| 8  | -1  | -10 | 3.88  | 1.46 |
| 10 | 6   | 4   | -0.51 | 1.55 |
| 8  | 1   | -10 | 3.80  | 1.39 |
| 6  | -11 | -4  | 0.48  | 1.64 |
| 6  | 11  | -4  | -1.23 | 1.80 |
| 10 | 3   | -7  | 10.33 | 1.41 |
| 10 | -3  | -7  | 10.16 | 1.56 |
| 3  | 13  | 1   | -2.71 | 1.70 |
| 3  | -13 | 1   | 0.78  | 1.75 |
| 10 | -6  | 4   | -1.19 | 1.62 |
| 9  | 0   | -9  | 10.15 | 1.36 |
| 1  | 1   | 13  | 2.16  | 1.11 |
| 2  | 0   | -13 | 0.27  | 1.37 |
| 1  | -1  | 13  | 4.77  | 1.15 |
| 6  | 2   | 11  | 0.92  | 1.40 |
| 0  | -12 | -6  | 0.94  | 1.47 |
| 0  | 12  | 6   | 0.32  | 1.91 |
| 6  | -2  | 11  | -1.29 | 1.54 |
| 11 | 4   | -4  | 9.96  | 1.40 |
| 11 | -4  | -4  | 12.03 | 1.34 |
| 3  | 4   | 12  | 2.28  | 1.08 |
| 4  | 12  | 4   | 1.83  | 1.62 |
| 8  | 10  | 1   | -0.27 | 1.66 |
| 12 | 1   | 0   | 8.07  | 1.21 |
| 3  | -4  | 12  | 2.44  | 1.65 |
| 10 | 7   | -3  | 1.89  | 1.75 |
| 7  | 7   | 8   | 1.85  | 1.13 |
| 0  | 12  | -6  | -0.44 | 1.48 |
| 10 | -7  | -3  | 1.97  | 1.20 |
| 0  | -12 | 6   | -0.14 | 1.54 |
| 8  | -10 | 1   | 2.91  | 1.17 |
| 12 | -1  | 0   | 2.83  | 1.29 |

|    |     |     |       |      |
|----|-----|-----|-------|------|
| 4  | -12 | 4   | -0.14 | 1.73 |
| 12 | -1  | -1  | 0.01  | 1.64 |
| 12 | 1   | -1  | -0.78 | 1.54 |
| 7  | -7  | 8   | 0.83  | 1.66 |
| 5  | -7  | -10 | 0.86  | 1.90 |
| 0  | -2  | -13 | 0.53  | 1.57 |
| 0  | 2   | 13  | 0.79  | 1.58 |
| 3  | -11 | -7  | 0.94  | 1.81 |
| 7  | 11  | 0   | 0.31  | 1.85 |
| 6  | -6  | -10 | 0.01  | 1.81 |
| 11 | 0   | 5   | 2.04  | 1.07 |
| 10 | 0   | 7   | 1.58  | 1.54 |
| 0  | -2  | 13  | -0.39 | 1.68 |
| 9  | -1  | -9  | -2.59 | 1.79 |
| 0  | 2   | -13 | 1.35  | 1.72 |
| 5  | 7   | -10 | 0.48  | 1.53 |
| 9  | 1   | -9  | 0.80  | 1.69 |
| 3  | 11  | -7  | 0.45  | 1.56 |
| 6  | 6   | -10 | -0.95 | 1.75 |
| 3  | 12  | 5   | 0.16  | 1.60 |
| 2  | -1  | -13 | -2.09 | 1.38 |
| 7  | -11 | 0   | 3.39  | 1.32 |
| 5  | 9   | 8   | 0.15  | 1.62 |
| 1  | -12 | -6  | -0.14 | 1.75 |
| 2  | 1   | -13 | -0.26 | 1.49 |
| 1  | -2  | -13 | 1.57  | 1.80 |
| 9  | 9   | 0   | -1.36 | 1.66 |
| 3  | -12 | 5   | -1.86 | 1.62 |
| 1  | 2   | -13 | 2.16  | 1.10 |
| 11 | 5   | 2   | 3.64  | 1.12 |
| 1  | 12  | -6  | 0.01  | 1.56 |
| 9  | -9  | 0   | -0.54 | 1.56 |
| 3  | 8   | 10  | 1.74  | 1.43 |
| 2  | -13 | -3  | 0.89  | 1.53 |
| 11 | -5  | 2   | 1.73  | 1.56 |
| 12 | 0   | 1   | 0.01  | 1.58 |
| 9  | 5   | 7   | 4.42  | 1.15 |
| 7  | 11  | -1  | 0.01  | 1.79 |
| 5  | -9  | 8   | 0.72  | 1.07 |
| 2  | 13  | -3  | -1.45 | 1.53 |
| 7  | -11 | -1  | 3.72  | 1.24 |
| 9  | 9   | -1  | 3.95  | 1.17 |
| 2  | 7   | 11  | -0.52 | 1.53 |
| 3  | -8  | 10  | -2.26 | 1.72 |
| 9  | -5  | 7   | 1.69  | 1.22 |
| 5  | -2  | -12 | 4.31  | 1.66 |
| 9  | -9  | -1  | 0.57  | 1.68 |
| 5  | 2   | -12 | 5.03  | 1.53 |
| 10 | 1   | 7   | -2.36 | 1.48 |
| 8  | 10  | -2  | -1.15 | 1.58 |
| 11 | 1   | 5   | 7.21  | 1.44 |
| 7  | 9   | 6   | -0.40 | 1.46 |
| 1  | 12  | 6   | 0.64  | 1.66 |
| 6  | 7   | 9   | 0.14  | 1.59 |
| 10 | -1  | 7   | -1.17 | 1.45 |
| 2  | -7  | 11  | -1.26 | 1.56 |
| 11 | -1  | 5   | 6.71  | 1.45 |
| 12 | 0   | -2  | -1.04 | 1.75 |

|    |     |     |       |      |
|----|-----|-----|-------|------|
| 9  | 3   | 8   | 3.57  | 1.15 |
| 8  | -10 | -2  | 2.51  | 1.06 |
| 11 | 3   | -5  | -1.56 | 1.76 |
| 11 | -3  | -5  | 1.06  | 1.58 |
| 2  | 5   | 12  | 2.23  | 1.53 |
| 9  | -3  | 8   | 5.00  | 1.18 |
| 5  | -12 | -3  | -0.94 | 1.83 |
| 7  | -9  | 6   | 1.13  | 1.43 |
| 2  | 13  | 3   | 1.86  | 1.60 |
| 1  | -12 | 6   | 1.55  | 1.17 |
| 7  | 0   | -11 | 2.78  | 1.14 |
| 5  | 12  | -3  | 0.01  | 1.69 |
| 6  | -7  | 9   | 0.90  | 0.99 |
| 2  | -5  | 12  | 2.39  | 1.09 |
| 4  | -9  | -9  | -3.11 | 1.88 |
| 12 | -1  | 1   | 0.67  | 1.76 |
| 3  | -13 | -2  | 2.12  | 1.89 |
| 12 | 1   | 1   | 1.99  | 1.09 |
| 2  | -13 | 3   | 2.67  | 1.27 |
| 10 | 4   | 6   | 1.33  | 1.36 |
| 5  | 8   | 9   | 7.02  | 1.24 |
| 7  | 11  | 1   | 1.62  | 1.47 |
| 3  | 13  | -2  | 0.16  | 1.75 |
| 4  | 9   | -9  | -0.91 | 1.54 |
| 10 | -4  | 6   | -1.97 | 1.53 |
| 7  | -11 | 1   | -1.16 | 1.79 |
| 11 | 5   | -3  | -0.65 | 1.66 |
| 6  | -4  | -11 | 3.01  | 1.42 |
| 11 | -5  | -3  | 2.26  | 1.68 |
| 8  | -2  | -10 | 1.06  | 1.79 |
| 6  | 4   | -11 | 4.35  | 1.39 |
| 8  | 2   | -10 | -1.46 | 1.80 |
| 5  | -8  | 9   | 2.54  | 1.97 |
| 9  | 9   | 1   | 0.70  | 1.61 |
| 10 | -5  | -6  | 0.81  | 1.69 |
| 10 | -6  | -5  | -1.46 | 1.75 |
| 10 | 5   | -6  | 0.68  | 1.76 |
| 12 | -1  | -2  | 6.50  | 1.28 |
| 9  | -9  | 1   | 0.98  | 1.45 |
| 4  | 3   | 12  | -0.64 | 1.54 |
| 10 | 6   | -5  | 1.09  | 1.73 |
| 12 | 1   | -2  | 6.68  | 1.32 |
| 4  | -4  | -12 | -2.65 | 2.03 |
| 1  | 2   | 13  | -0.64 | 1.54 |
| 6  | 11  | 4   | 1.30  | 1.55 |
| 1  | -2  | 13  | -0.93 | 1.46 |
| 4  | -3  | 12  | -0.92 | 1.56 |
| 3  | 13  | 2   | 1.87  | 1.56 |
| 4  | 4   | -12 | -1.68 | 1.87 |
| 7  | -1  | -11 | 4.33  | 1.34 |
| 7  | 1   | -11 | 2.72  | 1.91 |
| 6  | -11 | 4   | -1.78 | 1.86 |
| 3  | -13 | 2   | 1.87  | 1.66 |
| 9  | -7  | -6  | 0.97  | 1.58 |
| 8  | -9  | -5  | 1.57  | 1.62 |
| 9  | 7   | -6  | -1.81 | 1.64 |
| 8  | 9   | -5  | 0.01  | 1.73 |
| 9  | -6  | -7  | 3.61  | 1.21 |

|    |     |     |       |      |
|----|-----|-----|-------|------|
| 9  | 6   | -7  | 3.75  | 1.09 |
| 12 | -2  | 0   | 1.46  | 1.47 |
| 12 | 2   | 0   | -1.18 | 1.54 |
| 8  | 7   | 7   | 1.34  | 1.45 |
| 12 | 2   | -1  | 0.28  | 1.53 |
| 9  | 8   | 4   | 1.09  | 1.52 |
| 4  | -10 | -8  | -2.71 | 1.96 |
| 12 | -2  | -1  | 1.07  | 1.38 |
| 0  | -10 | -9  | 1.98  | 1.74 |
| 0  | 10  | 9   | -0.90 | 1.78 |
| 8  | -7  | 7   | 0.01  | 1.38 |
| 3  | 11  | 7   | -0.43 | 1.71 |
| 2  | 0   | 13  | -1.84 | 1.43 |
| 9  | -8  | 4   | 2.82  | 0.96 |
| 7  | -10 | -5  | -0.59 | 1.84 |
| 11 | 0   | -6  | -0.65 | 1.74 |
| 7  | 10  | -5  | 0.63  | 1.91 |
| 4  | 10  | -8  | 1.07  | 1.19 |
| 5  | 10  | 7   | -2.21 | 1.85 |
| 3  | -7  | -11 | 5.65  | 1.28 |
| 9  | -2  | -9  | 3.64  | 1.33 |
| 9  | 2   | -9  | 2.00  | 1.93 |
| 2  | -2  | -13 | -2.61 | 1.81 |
| 2  | 2   | -13 | 1.80  | 1.12 |
| 0  | 10  | -9  | 1.93  | 1.31 |
| 6  | 10  | 6   | 0.98  | 1.49 |
| 3  | -11 | 7   | 1.10  | 1.54 |
| 0  | -10 | 9   | 2.25  | 1.63 |
| 3  | -5  | -12 | 1.52  | 1.64 |
| 0  | -13 | -4  | -2.87 | 1.81 |
| 0  | 13  | 4   | 0.62  | 1.65 |
| 7  | 11  | -2  | 4.98  | 1.21 |
| 9  | 9   | -2  | -0.97 | 1.79 |
| 8  | 10  | 2   | 3.25  | 1.20 |
| 7  | -11 | -2  | 5.19  | 1.43 |
| 5  | 12  | 3   | -1.06 | 1.53 |
| 9  | -9  | -2  | -3.19 | 1.71 |
| 8  | -5  | -9  | -1.46 | 1.98 |
| 8  | 8   | 6   | 1.76  | 1.32 |
| 5  | -10 | 7   | 1.19  | 1.74 |
| 3  | 7   | -11 | 5.88  | 1.67 |
| 3  | 5   | -12 | -0.47 | 1.93 |
| 0  | -13 | 4   | -1.02 | 1.64 |
| 8  | 5   | -9  | 2.28  | 1.32 |
| 0  | 13  | -4  | 0.30  | 1.50 |
| 8  | -10 | 2   | 2.59  | 1.89 |
| 1  | -10 | -9  | -0.62 | 1.46 |
| 6  | -10 | 6   | 1.47  | 1.74 |
| 5  | -12 | 3   | -0.46 | 1.81 |
| 8  | -8  | 6   | 1.94  | 1.37 |
| 2  | -12 | -6  | 2.31  | 1.74 |
| 2  | 12  | -6  | 0.74  | 1.30 |
| 1  | 10  | -9  | 1.26  | 1.50 |
| 10 | 7   | 3   | -0.39 | 1.42 |
| 2  | 1   | 13  | -0.52 | 1.35 |
| 0  | -9  | -10 | -1.14 | 1.57 |
| 0  | 9   | 10  | 1.74  | 1.46 |
| 2  | -1  | 13  | 0.94  | 1.53 |

|    |     |     |       |      |
|----|-----|-----|-------|------|
| 11 | 1   | -6  | 0.68  | 1.86 |
| 11 | -1  | -6  | 1.08  | 1.90 |
| 11 | 2   | 5   | 1.21  | 1.55 |
| 10 | 2   | 7   | 0.81  | 1.53 |
| 10 | -7  | 3   | 1.24  | 1.66 |
| 11 | -2  | 5   | -1.44 | 1.72 |
| 10 | -2  | 7   | 0.67  | 1.29 |
| 4  | -8  | -10 | 1.88  | 1.46 |
| 1  | -13 | -4  | 1.81  | 1.52 |
| 0  | 9   | -10 | 2.09  | 1.53 |
| 0  | -9  | 10  | 0.65  | 1.26 |
| 6  | 3   | 11  | 9.55  | 1.35 |
| 4  | 6   | 11  | 0.01  | 1.65 |
| 1  | 13  | -4  | 0.89  | 1.24 |
| 6  | -3  | 11  | 10.18 | 1.37 |
| 12 | 2   | 1   | 1.21  | 1.48 |
| 4  | 8   | -10 | 4.11  | 1.21 |
| 1  | -9  | -10 | 0.01  | 1.69 |
| 3  | 0   | -13 | 0.28  | 1.63 |
| 12 | 0   | 2   | 0.28  | 1.65 |
| 12 | -2  | 1   | -1.18 | 1.64 |
| 7  | -5  | -10 | 2.77  | 1.39 |
| 8  | 4   | 9   | 1.08  | 1.58 |
| 4  | -6  | 11  | 2.43  | 1.02 |
| 7  | 5   | -10 | 3.96  | 1.40 |
| 1  | 9   | -10 | -0.64 | 1.60 |
| 1  | 10  | 9   | 1.91  | 1.48 |
| 1  | 13  | 4   | 2.26  | 1.21 |
| 8  | -4  | 9   | -1.34 | 1.52 |
| 0  | 3   | 13  | 1.59  | 1.61 |
| 0  | -3  | -13 | 4.56  | 1.12 |
| 1  | -13 | 4   | 1.37  | 1.76 |
| 0  | -3  | 13  | 2.96  | 1.06 |
| 1  | -10 | 9   | 0.65  | 1.69 |
| 12 | -2  | -2  | 2.01  | 1.37 |
| 12 | 2   | -2  | 1.35  | 1.59 |
| 0  | 3   | -13 | 2.55  | 1.15 |
| 7  | 6   | 9   | -0.26 | 1.41 |
| 10 | 0   | -8  | 1.08  | 1.82 |
| 1  | -3  | -13 | 0.14  | 1.30 |
| 7  | 11  | 2   | 0.60  | 1.85 |
| 2  | 12  | 6   | 0.64  | 1.52 |
| 7  | -6  | 9   | -1.36 | 1.59 |
| 7  | -11 | 2   | 2.92  | 1.28 |
| 7  | -2  | -11 | 0.02  | 1.86 |
| 1  | 3   | -13 | -3.58 | 1.64 |
| 5  | 0   | 12  | 1.00  | 0.99 |
| 0  | 6   | 12  | -0.26 | 1.66 |
| 7  | 2   | -11 | 2.12  | 1.21 |
| 0  | -6  | -12 | 1.21  | 1.59 |
| 3  | -1  | -13 | 0.28  | 1.48 |
| 3  | 1   | -13 | -0.27 | 1.56 |
| 12 | 1   | 2   | 2.77  | 1.29 |
| 2  | -12 | 6   | -1.41 | 1.80 |
| 12 | 0   | -3  | 1.48  | 1.60 |
| 5  | 5   | 11  | 1.87  | 1.28 |
| 11 | 6   | 0   | 2.03  | 1.46 |
| 12 | -1  | 2   | 2.55  | 1.85 |

|    |     |     |       |      |
|----|-----|-----|-------|------|
| 7  | 4   | 10  | 1.95  | 0.97 |
| 5  | -3  | -12 | 1.74  | 2.08 |
| 11 | 4   | 4   | 2.70  | 1.84 |
| 5  | -11 | -6  | 5.53  | 1.49 |
| 0  | 6   | -12 | -0.72 | 1.72 |
| 8  | -10 | -3  | 1.68  | 1.06 |
| 0  | -6  | 12  | 0.89  | 1.60 |
| 11 | -6  | 0   | -2.17 | 1.64 |
| 8  | 10  | -3  | -0.89 | 1.60 |
| 9  | 9   | 2   | 0.01  | 1.70 |
| 5  | -5  | 11  | -1.92 | 1.64 |
| 5  | 11  | -6  | 4.85  | 1.27 |
| 5  | 3   | -12 | 2.29  | 2.02 |
| 11 | -4  | 4   | 2.76  | 1.11 |
| 11 | 6   | -1  | 0.96  | 1.76 |
| 0  | -11 | -8  | -0.31 | 1.63 |
| 7  | -4  | 10  | -0.80 | 1.52 |
| 1  | -6  | -12 | 1.37  | 1.55 |
| 1  | 9   | 10  | -0.56 | 1.60 |
| 0  | 11  | 8   | 1.28  | 1.62 |
| 11 | -6  | -1  | 1.92  | 1.86 |
| 10 | -4  | -7  | -0.79 | 1.88 |
| 9  | -9  | 2   | 0.01  | 1.58 |
| 8  | 6   | 8   | -1.47 | 1.58 |
| 10 | 4   | -7  | 3.60  | 1.27 |
| 10 | 1   | -8  | 3.67  | 1.24 |
| 10 | -1  | -8  | -1.45 | 1.93 |
| 1  | 6   | -12 | 1.38  | 1.61 |
| 0  | 11  | -8  | 0.96  | 1.59 |
| 0  | -11 | 8   | -1.41 | 1.62 |
| 10 | 7   | -4  | 2.78  | 1.90 |
| 1  | -9  | 10  | -1.40 | 1.65 |
| 10 | -7  | -4  | 2.86  | 1.27 |
| 5  | 1   | 12  | -0.52 | 1.74 |
| 8  | -6  | 8   | -0.96 | 1.39 |
| 5  | -1  | 12  | 0.81  | 1.63 |
| 9  | -8  | -5  | 1.32  | 1.13 |
| 4  | -12 | -5  | 1.87  | 1.84 |
| 11 | 5   | 3   | 0.54  | 1.39 |
| 4  | 9   | 9   | 2.21  | 1.61 |
| 4  | 13  | 0   | -0.31 | 1.52 |
| 9  | 8   | -5  | 0.30  | 1.73 |
| 12 | -1  | -3  | 1.35  | 1.73 |
| 3  | -13 | -3  | -0.61 | 1.87 |
| 12 | 1   | -3  | 0.95  | 1.65 |
| 4  | -13 | 0   | 0.00  | 1.23 |
| 1  | -11 | -8  | 2.59  | 1.93 |
| 7  | -8  | -8  | -0.74 | 1.86 |
| 2  | -10 | -9  | -0.82 | 1.97 |
| 4  | 12  | -5  | 0.00  | 1.71 |
| 11 | -5  | 3   | 0.81  | 1.41 |
| 6  | 12  | 0   | -3.77 | 2.11 |
| 3  | 13  | -3  | 2.71  | 1.20 |
| 9  | -5  | -8  | -0.68 | 1.83 |
| 7  | 8   | -8  | 0.32  | 1.87 |
| 6  | -12 | 0   | -1.42 | 1.79 |
| 8  | -3  | -10 | 1.49  | 1.95 |
| 9  | 5   | -8  | -2.23 | 1.75 |

|    |     |     |       |      |
|----|-----|-----|-------|------|
| 2  | 2   | 13  | 0.27  | 1.47 |
| 4  | -9  | 9   | 0.29  | 1.70 |
| 1  | 11  | -8  | 2.94  | 1.22 |
| 8  | 3   | -10 | 1.25  | 1.78 |
| 2  | 10  | -9  | -1.70 | 1.86 |
| 11 | 2   | -6  | 4.03  | 1.16 |
| 11 | -2  | -6  | 2.02  | 1.79 |
| 2  | -2  | 13  | 1.49  | 1.36 |
| 5  | 7   | 10  | 1.95  | 1.08 |
| 1  | 3   | 13  | 0.67  | 1.56 |
| 10 | 8   | 0   | 2.49  | 1.36 |
| 1  | -3  | 13  | 0.97  | 1.41 |
| 4  | 10  | 8   | -0.43 | 1.65 |
| 5  | -7  | 10  | 0.14  | 1.59 |
| 10 | -8  | 0   | 5.65  | 1.38 |
| 6  | 12  | -1  | 1.27  | 1.67 |
| 4  | 13  | -1  | -0.62 | 1.77 |
| 4  | -13 | -1  | 2.54  | 1.12 |
| 6  | -12 | -1  | 0.32  | 1.67 |
| 11 | 6   | 1   | 1.77  | 1.42 |
| 11 | -6  | 1   | 0.55  | 1.60 |
| 10 | 8   | -1  | 0.83  | 1.56 |
| 2  | -9  | -10 | 0.40  | 1.24 |
| 1  | 6   | 12  | -3.23 | 1.71 |
| 12 | 3   | 0   | -0.81 | 1.48 |
| 10 | -8  | -1  | 0.70  | 1.64 |
| 12 | -3  | 0   | -0.54 | 1.48 |
| 4  | -10 | 8   | 1.67  | 1.57 |
| 1  | 11  | 8   | 1.71  | 1.66 |
| 2  | -13 | -4  | 0.00  | 1.61 |
| 6  | -9  | -8  | 3.25  | 1.37 |
| 12 | -3  | -1  | 3.22  | 1.20 |
| 3  | 13  | 3   | 0.00  | 1.83 |
| 3  | 7   | 11  | 0.68  | 1.62 |
| 12 | 3   | -1  | 2.30  | 1.62 |
| 4  | 13  | 1   | -0.32 | 1.64 |
| 7  | 10  | 5   | -0.42 | 1.75 |
| 1  | -6  | 12  | 0.29  | 1.51 |
| 2  | 9   | -10 | 2.24  | 1.63 |
| 9  | 9   | -3  | 2.16  | 1.64 |
| 2  | 13  | -4  | 0.45  | 1.39 |
| 6  | -11 | -5  | 2.28  | 1.84 |
| 4  | -13 | 1   | -3.50 | 1.80 |
| 9  | -9  | -3  | 3.13  | 1.25 |
| 6  | 9   | -8  | 0.81  | 1.81 |
| 3  | -13 | 3   | 1.11  | 1.61 |
| 6  | 11  | -5  | -0.16 | 1.88 |
| 7  | 11  | -3  | 0.31  | 1.74 |
| 1  | -11 | 8   | -2.09 | 1.71 |
| 7  | -11 | -3  | -1.08 | 1.76 |
| 9  | 4   | 8   | 0.41  | 1.50 |
| 2  | -3  | -13 | 1.06  | 1.47 |
| 9  | -3  | -9  | -0.27 | 1.81 |
| 11 | -4  | -5  | 1.89  | 1.45 |
| 8  | 9   | 5   | -0.97 | 1.73 |
| 9  | 3   | -9  | -0.55 | 1.78 |
| 3  | -7  | 11  | 2.00  | 1.28 |
| 7  | -10 | 5   | 0.59  | 1.56 |



|    |     |     |       |      |
|----|-----|-----|-------|------|
| 6  | 12  | 1   | 2.58  | 1.17 |
| 11 | 4   | -5  | 0.41  | 1.67 |
| 2  | 3   | -13 | 0.14  | 1.50 |
| 9  | -4  | 8   | -1.36 | 1.61 |
| 7  | -9  | -7  | -0.76 | 1.63 |
| 4  | -11 | -7  | 0.96  | 1.61 |
| 11 | -6  | -2  | 1.37  | 1.86 |
| 6  | -8  | -9  | -0.96 | 1.75 |
| 11 | 6   | -2  | -0.96 | 1.80 |
| 5  | -12 | -4  | 3.51  | 1.23 |
| 6  | -12 | 1   | 1.10  | 1.93 |
| 7  | 9   | -7  | -1.91 | 1.95 |
| 11 | -5  | -4  | -0.68 | 1.73 |
| 11 | 5   | -4  | -2.18 | 1.71 |
| 3  | 5   | 12  | 2.01  | 1.17 |
| 5  | 12  | -4  | 0.31  | 1.74 |
| 8  | -9  | 5   | -0.57 | 1.62 |
| 3  | -2  | -13 | -1.34 | 1.56 |
| 4  | 11  | -7  | -2.46 | 1.82 |
| 12 | 2   | 2   | 1.22  | 1.43 |
| 6  | 6   | 10  | 2.16  | 1.05 |
| 6  | 8   | -9  | 1.31  | 1.52 |
| 3  | 2   | -13 | 0.44  | 1.28 |
| 3  | -5  | 12  | 0.98  | 1.58 |
| 12 | -2  | 2   | 0.67  | 1.68 |
| 5  | -6  | -11 | 1.45  | 2.32 |
| 2  | -6  | -12 | 3.55  | 1.10 |
| 2  | 13  | 4   | -0.16 | 1.74 |
| 6  | -6  | 10  | 0.98  | 1.54 |
| 5  | 6   | -11 | 0.50  | 2.05 |
| 10 | 3   | 7   | 0.95  | 1.46 |
| 10 | 8   | 1   | -0.97 | 1.70 |
| 11 | 3   | 5   | 1.50  | 1.79 |
| 2  | -13 | 4   | 1.57  | 1.52 |
| 4  | 4   | 12  | 1.21  | 1.42 |
| 8  | 10  | 3   | -1.28 | 1.76 |
| 7  | -7  | -9  | 2.63  | 2.06 |
| 2  | 6   | -12 | 2.11  | 1.06 |
| 0  | 8   | 11  | 0.56  | 1.33 |
| 10 | -8  | 1   | 1.05  | 1.21 |
| 11 | -3  | 5   | 1.28  | 1.11 |
| 0  | -8  | -11 | -0.71 | 1.59 |
| 10 | 2   | -8  | 3.04  | 1.26 |
| 10 | -3  | 7   | 2.50  | 1.15 |
| 10 | -2  | -8  | 0.67  | 1.95 |
| 10 | 6   | 5   | 0.14  | 1.57 |
| 7  | 7   | -9  | 7.08  | 1.26 |
| 2  | 10  | 9   | 1.17  | 1.49 |
| 5  | 2   | 12  | 1.35  | 1.39 |
| 8  | -10 | 3   | 0.15  | 1.65 |
| 4  | 12  | 5   | 1.56  | 1.74 |
| 4  | -4  | 12  | -0.28 | 1.55 |
| 10 | -6  | 5   | -0.14 | 1.35 |
| 8  | 0   | 10  | 0.81  | 1.24 |
| 3  | -12 | -6  | 3.20  | 1.43 |
| 0  | 8   | -11 | 1.11  | 1.56 |
| 0  | -8  | 11  | -0.16 | 1.50 |
| 5  | -2  | 12  | -0.27 | 1.51 |

|    |     |     |       |      |
|----|-----|-----|-------|------|
| 2  | -10 | 9   | 1.11  | 1.14 |
| 12 | 2   | -3  | -2.31 | 1.80 |
| 12 | 3   | 1   | 12.12 | 1.41 |
| 12 | -2  | -3  | 2.10  | 1.13 |
| 1  | -8  | -11 | 0.29  | 1.61 |
| 12 | -3  | 1   | 11.22 | 1.35 |
| 4  | -12 | 5   | -0.80 | 1.81 |
| 8  | -8  | -7  | -1.86 | 1.78 |
| 3  | 12  | -6  | 2.12  | 1.86 |
| 6  | 0   | -12 | 0.59  | 1.85 |
| 8  | 8   | -7  | -3.36 | 1.92 |
| 2  | -11 | -8  | -1.95 | 2.03 |
| 8  | -7  | -8  | 0.42  | 1.74 |
| 4  | 8   | 10  | 3.51  | 1.22 |
| 1  | 8   | -11 | 2.31  | 1.68 |
| 5  | 11  | 6   | 1.62  | 1.64 |
| 10 | 8   | -2  | 6.43  | 1.19 |
| 8  | 7   | -8  | -1.51 | 1.75 |
| 10 | -8  | -2  | 3.74  | 1.26 |
| 12 | 3   | -2  | -0.55 | 1.54 |
| 2  | 11  | -8  | -1.98 | 1.82 |
| 6  | -12 | -2  | 3.56  | 1.09 |
| 6  | 12  | -2  | 0.48  | 1.87 |
| 9  | 7   | 6   | -2.34 | 1.69 |
| 3  | 0   | 13  | 7.31  | 1.40 |
| 12 | -3  | -2  | 1.42  | 1.01 |
| 4  | 13  | -2  | 1.17  | 1.19 |
| 4  | -13 | -2  | 0.00  | 2.07 |
| 5  | -11 | 6   | 1.79  | 1.12 |
| 4  | -8  | 10  | 5.26  | 1.24 |
| 2  | 9   | 10  | -0.71 | 1.97 |
| 7  | -3  | -11 | -3.43 | 2.15 |
| 9  | -7  | 6   | 0.21  | 1.16 |
| 8  | 1   | 10  | 3.81  | 0.99 |
| 8  | -1  | 10  | 3.92  | 0.92 |
| 7  | 3   | -11 | 0.30  | 1.60 |
| 10 | 5   | 6   | 3.35  | 1.09 |
| 6  | -1  | -12 | -0.28 | 1.72 |
| 10 | -5  | 6   | 1.39  | 1.82 |
| 12 | 0   | 3   | 0.82  | 1.46 |
| 2  | -9  | 10  | -2.17 | 1.81 |
| 6  | 1   | -12 | 2.03  | 1.88 |
| 9  | 0   | 9   | 3.94  | 1.02 |
| 6  | -5  | -11 | 2.71  | 1.19 |
| 6  | 5   | -11 | 0.17  | 1.81 |
| 7  | 11  | 3   | 0.30  | 1.51 |
| 4  | -7  | -11 | 1.06  | 1.73 |
| 3  | 1   | 13  | -0.27 | 1.59 |
| 3  | -1  | 13  | 1.50  | 1.45 |
| 5  | 12  | 4   | -0.94 | 1.75 |
| 1  | 8   | 11  | -0.56 | 1.55 |
| 7  | -11 | 3   | -2.29 | 1.65 |
| 4  | -5  | -12 | -1.40 | 1.92 |
| 6  | 4   | 11  | 1.77  | 1.54 |
| 4  | 13  | 2   | -1.29 | 1.71 |
| 5  | -12 | 4   | -0.96 | 1.92 |
| 4  | 7   | -11 | 1.81  | 1.65 |
| 4  | 5   | -12 | -3.26 | 1.72 |

|    |     |     |       |      |
|----|-----|-----|-------|------|
| 6  | -4  | 11  | -2.36 | 1.56 |
| 6  | -10 | -7  | 1.16  | 1.69 |
| 11 | 6   | 2   | -1.10 | 1.54 |
| 1  | -8  | 11  | 0.62  | 1.84 |
| 4  | -13 | 2   | 1.77  | 1.62 |
| 9  | 6   | 7   | 1.37  | 1.80 |
| 11 | -6  | 2   | 0.42  | 1.51 |
| 6  | 10  | -7  | -1.31 | 1.94 |
| 9  | 1   | 9   | 1.64  | 1.10 |
| 6  | 12  | 2   | 0.47  | 1.61 |
| 9  | 9   | 3   | 1.98  | 1.67 |
| 12 | -1  | 3   | -2.05 | 1.75 |
| 12 | 1   | 3   | 1.85  | 1.10 |
| 9  | -1  | 9   | -0.41 | 1.31 |
| 9  | -6  | 7   | 3.31  | 1.20 |
| 2  | 3   | 13  | 1.63  | 1.45 |
| 0  | 4   | 13  | 1.89  | 1.20 |
| 6  | -12 | 2   | 0.48  | 1.93 |
| 3  | 12  | 6   | 1.43  | 1.62 |
| 0  | -4  | -13 | 2.56  | 1.09 |
| 10 | 7   | 4   | 6.23  | 1.25 |
| 11 | -3  | -6  | 7.32  | 1.43 |
| 9  | -9  | 3   | 2.30  | 1.68 |
| 11 | 3   | -6  | 5.19  | 1.35 |
| 2  | -3  | 13  | 2.17  | 1.09 |
| 12 | 0   | -4  | 6.63  | 1.38 |
| 0  | 4   | -13 | 1.27  | 1.75 |
| 2  | 11  | 8   | -0.92 | 1.55 |
| 0  | -4  | 13  | 2.83  | 1.06 |
| 6  | 11  | 5   | 3.40  | 1.13 |
| 5  | -9  | -9  | 0.34  | 2.02 |
| 10 | -7  | 4   | 4.52  | 1.37 |
| 4  | 11  | 7   | 0.30  | 1.80 |
| 1  | -4  | -13 | 0.95  | 1.45 |
| 2  | 6   | 12  | -1.50 | 1.74 |
| 3  | -10 | -9  | -2.00 | 1.58 |
| 3  | -12 | 6   | -0.33 | 1.53 |
| 5  | 9   | -9  | -0.81 | 1.68 |
| 4  | 0   | -13 | 0.58  | 1.46 |
| 6  | -11 | 5   | 4.77  | 1.25 |
| 2  | -11 | 8   | -2.77 | 1.70 |
| 11 | 0   | 6   | -0.68 | 1.68 |
| 7  | 0   | 11  | 1.84  | 1.06 |
| 1  | 4   | -13 | 0.00  | 1.54 |
| 2  | -6  | 12  | 0.72  | 1.53 |
| 3  | 10  | -9  | -0.31 | 1.77 |
| 8  | -10 | -4  | -0.15 | 1.75 |
| 4  | -11 | 7   | 2.38  | 1.62 |
| 8  | 10  | -4  | -0.77 | 1.94 |
| 2  | -8  | -11 | -1.23 | 1.58 |
| 5  | -4  | -12 | 1.56  | 2.62 |
| 0  | 13  | 5   | 0.16  | 1.83 |
| 0  | -13 | -5  | -1.90 | 1.94 |
| 11 | -6  | -3  | 5.64  | 1.35 |
| 5  | 4   | -12 | 4.93  | 1.51 |
| 11 | 6   | -3  | 6.07  | 1.40 |
| 10 | 8   | 2   | 1.40  | 1.74 |
| 2  | 8   | -11 | 0.66  | 1.61 |

|    |     |     |       |      |
|----|-----|-----|-------|------|
| 9  | 8   | 5   | -0.42 | 1.51 |
| 10 | -6  | -6  | -1.68 | 1.85 |
| 10 | -8  | 2   | 1.64  | 1.28 |
| 0  | -13 | 5   | -0.61 | 1.96 |
| 6  | -7  | -10 | 0.16  | 1.77 |
| 0  | 13  | -5  | 0.92  | 1.45 |
| 10 | 6   | -6  | -1.84 | 1.66 |
| 12 | -1  | -4  | 3.03  | 1.22 |
| 0  | 12  | 7   | 2.70  | 1.18 |
| 12 | 1   | -4  | 0.55  | 1.74 |
| 0  | -12 | -7  | -2.62 | 1.72 |
| 3  | -9  | -10 | -0.34 | 1.81 |
| 9  | -8  | 5   | -0.14 | 1.43 |
| 6  | 7   | -10 | 1.84  | 1.96 |
| 0  | 12  | -7  | 0.47  | 1.71 |
| 0  | -12 | 7   | 1.58  | 1.12 |
| 4  | -1  | -13 | 1.53  | 1.40 |
| 8  | 2   | 10  | -0.41 | 1.33 |
| 8  | -2  | 10  | 0.00  | 1.42 |
| 0  | 14  | 0   | -0.15 | 1.51 |
| 3  | 9   | -10 | -3.02 | 1.78 |
| 11 | 1   | 6   | -0.41 | 1.64 |
| 0  | -14 | 0   | 1.51  | 1.72 |
| 4  | 1   | -13 | 1.39  | 1.72 |
| 7  | 1   | 11  | 3.30  | 1.11 |
| 11 | -1  | 6   | 2.95  | 1.05 |
| 3  | -3  | -13 | 0.00  | 1.59 |
| 8  | -9  | -6  | 2.22  | 1.60 |
| 12 | 3   | 2   | 3.32  | 1.15 |
| 7  | -1  | 11  | 0.55  | 1.73 |
| 5  | -10 | -8  | 2.19  | 1.94 |
| 3  | 3   | -13 | 0.93  | 1.48 |
| 8  | 5   | 9   | 2.21  | 1.57 |
| 12 | -3  | 2   | 0.14  | 1.65 |
| 8  | 9   | -6  | -2.34 | 2.00 |
| 1  | -13 | -5  | 2.03  | 1.44 |
| 6  | -2  | -12 | 2.04  | 1.84 |
| 5  | 10  | -8  | -0.48 | 1.60 |
| 6  | 2   | -12 | 0.67  | 2.11 |
| 3  | -13 | -4  | 1.41  | 1.65 |
| 1  | -12 | -7  | -0.98 | 1.91 |
| 8  | -4  | -10 | -1.66 | 1.86 |
| 8  | -5  | 9   | 1.83  | 1.62 |
| 1  | 13  | -5  | -2.12 | 1.56 |
| 3  | 13  | -4  | 2.00  | 1.69 |
| 8  | 4   | -10 | 0.87  | 1.71 |
| 7  | -10 | -6  | 1.74  | 1.93 |
| 10 | -3  | -8  | 2.36  | 1.88 |
| 1  | 12  | -7  | 0.46  | 1.39 |
| 1  | 4   | 13  | 0.54  | 1.37 |
| 3  | 2   | 13  | 0.96  | 1.51 |
| 7  | 10  | -6  | 3.26  | 1.24 |
| 10 | 3   | -8  | 1.11  | 1.90 |
| 3  | -2  | 13  | 1.11  | 1.64 |
| 3  | -6  | -12 | 1.47  | 1.44 |
| 8  | -6  | -9  | 0.27  | 1.76 |
| 1  | -4  | 13  | -2.43 | 1.68 |
| 1  | 13  | 5   | 0.96  | 1.94 |

|    |     |     |       |      |
|----|-----|-----|-------|------|
| 5  | 3   | 12  | 1.91  | 1.66 |
| 0  | 14  | 1   | -1.08 | 1.62 |
| 3  | 6   | -12 | -2.05 | 1.77 |
| 0  | -14 | -1  | -3.36 | 1.60 |
| 5  | -3  | 12  | 2.01  | 1.18 |
| 8  | 6   | -9  | 0.44  | 1.68 |
| 0  | -14 | 1   | -1.83 | 1.74 |
| 12 | 3   | -3  | 3.80  | 1.21 |
| 12 | 4   | 0   | -1.26 | 1.65 |
| 12 | -3  | -3  | 1.78  | 1.73 |
| 0  | 14  | -1  | -0.92 | 1.74 |
| 1  | -13 | 5   | 1.09  | 1.73 |
| 10 | 8   | -3  | -1.31 | 1.64 |
| 6  | 9   | 8   | 0.27  | 1.85 |
| 7  | 8   | 8   | 0.41  | 1.47 |
| 10 | -8  | -3  | -0.30 | 1.60 |
| 12 | -4  | 0   | 1.85  | 1.08 |
| 11 | 5   | 4   | 4.37  | 1.06 |
| 12 | 2   | 3   | 4.72  | 1.27 |
| 9  | 2   | 9   | 0.96  | 1.56 |
| 1  | -14 | 0   | 2.41  | 1.69 |
| 7  | 5   | 10  | 3.45  | 1.05 |
| 9  | 9   | -4  | -0.16 | 1.71 |
| 1  | 14  | 0   | 0.75  | 1.49 |
| 9  | -9  | -4  | -1.47 | 1.57 |
| 12 | 4   | -1  | -1.26 | 1.75 |
| 9  | -2  | 9   | -1.25 | 1.45 |
| 12 | -2  | 3   | 4.81  | 1.36 |
| 5  | -8  | -10 | 0.69  | 2.06 |
| 1  | 12  | 7   | 1.47  | 1.59 |
| 12 | -4  | -1  | 1.92  | 1.49 |
| 11 | -5  | 4   | 1.66  | 1.85 |
| 6  | -12 | -3  | 3.39  | 1.11 |
| 7  | -8  | 8   | -0.01 | 1.67 |
| 7  | -5  | 10  | 3.54  | 1.17 |
| 10 | -5  | -7  | 3.60  | 1.28 |
| 6  | 12  | -3  | 0.48  | 1.48 |
| 10 | 5   | -7  | 2.25  | 1.82 |
| 7  | 11  | -4  | -0.34 | 1.90 |
| 6  | -9  | 8   | -0.46 | 1.62 |
| 7  | -11 | -4  | 1.26  | 1.84 |
| 2  | -4  | -13 | 1.77  | 1.58 |
| 10 | 7   | -5  | -0.01 | 1.76 |
| 5  | 8   | -10 | -0.50 | 1.82 |
| 10 | -7  | -5  | 2.71  | 1.25 |
| 9  | -4  | -9  | 0.12  | 1.93 |
| 1  | -12 | 7   | -4.07 | 1.90 |
| 9  | 4   | -9  | 1.41  | 1.63 |
| 7  | 9   | 7   | -0.58 | 1.49 |
| 4  | -13 | -3  | 1.12  | 2.02 |
| 4  | 13  | -3  | 0.94  | 1.68 |
| 2  | 4   | -13 | 1.37  | 1.70 |
| 3  | 13  | 4   | 2.12  | 1.85 |
| 7  | -9  | 7   | 1.03  | 1.37 |
| 3  | -11 | -8  | -0.34 | 1.60 |
| 9  | -7  | -7  | 1.57  | 1.53 |
| 9  | 7   | -7  | -0.61 | 1.90 |
| 1  | -14 | -1  | -0.32 | 1.78 |

|    |     |     |       |      |
|----|-----|-----|-------|------|
| 7  | -6  | -10 | 2.33  | 1.67 |
| 3  | -13 | 4   | 1.62  | 1.53 |
| 1  | 14  | -1  | 0.90  | 1.39 |
| 2  | 8   | 11  | 2.82  | 0.99 |
| 3  | 11  | -8  | 0.92  | 1.82 |
| 1  | 14  | 1   | 0.30  | 1.70 |
| 7  | 6   | -10 | -3.43 | 2.09 |
| 1  | -14 | 1   | 0.30  | 1.42 |
| 11 | 0   | -7  | 0.40  | 1.64 |
| 10 | 4   | 7   | 0.55  | 1.59 |
| 11 | 4   | 5   | -0.15 | 1.48 |
| 6  | 8   | 9   | -0.85 | 1.62 |
| 12 | 2   | -4  | 0.82  | 1.81 |
| 12 | -2  | -4  | -2.52 | 1.90 |
| 2  | -8  | 11  | 0.29  | 1.73 |
| 3  | 10  | 9   | -0.31 | 1.86 |
| 11 | -4  | 5   | 3.27  | 0.96 |
| 10 | -4  | 7   | -1.69 | 1.71 |
| 6  | -8  | 9   | -0.45 | 1.71 |
| 4  | -2  | -13 | 0.96  | 1.45 |
| 7  | 2   | 11  | -1.27 | 1.72 |
| 4  | 2   | -13 | -1.82 | 1.67 |
| 11 | 2   | 6   | 3.21  | 1.18 |
| 11 | -2  | 6   | -0.01 | 1.86 |
| 3  | -10 | 9   | 1.66  | 1.16 |
| 12 | 4   | 1   | -1.41 | 1.51 |
| 7  | -2  | 11  | 0.54  | 1.09 |
| 12 | -4  | 1   | 0.54  | 1.69 |
| 5  | 6   | 11  | 2.07  | 1.54 |
| 10 | 0   | 8   | 6.72  | 1.40 |
| 5  | -6  | 11  | 4.10  | 1.23 |
| 4  | 13  | 3   | -2.15 | 2.01 |
| 11 | -1  | -7  | 4.57  | 1.36 |
| 11 | 1   | -7  | 1.38  | 1.92 |
| 9  | 5   | 8   | 0.55  | 1.59 |
| 8  | 10  | 4   | -0.45 | 1.54 |
| 2  | -12 | -7  | 1.13  | 1.96 |
| 2  | -13 | -5  | 0.46  | 1.57 |
| 4  | -13 | 3   | -0.18 | 1.88 |
| 12 | 4   | -2  | -1.83 | 1.68 |
| 11 | -5  | -5  | -0.43 | 1.80 |
| 12 | -4  | -2  | 1.24  | 1.58 |
| 11 | 5   | -5  | 1.68  | 1.66 |
| 9  | -5  | 8   | 0.13  | 1.71 |
| 2  | 13  | -5  | 1.83  | 1.05 |
| 8  | -10 | 4   | 2.56  | 1.02 |
| 3  | 9   | 10  | 0.42  | 1.67 |
| 6  | 10  | 7   | 5.02  | 1.28 |
| 2  | 12  | -7  | 1.54  | 1.55 |
| 7  | -4  | -11 | -1.28 | 1.87 |
| 5  | -12 | -5  | -3.20 | 2.08 |
| 4  | 7   | 11  | 2.16  | 1.10 |
| 9  | -8  | -6  | -1.61 | 1.71 |
| 7  | 4   | -11 | -0.01 | 1.50 |
| 11 | 6   | 3   | 0.84  | 1.43 |
| 6  | 12  | 3   | -1.44 | 1.67 |
| 9  | 8   | -6  | -2.12 | 1.64 |
| 10 | 1   | 8   | 1.25  | 1.52 |

|    |     |     |       |      |
|----|-----|-----|-------|------|
| 8  | 8   | 7   | 1.98  | 1.45 |
| 11 | -6  | 3   | -1.30 | 1.59 |
| 0  | 14  | 2   | 1.38  | 1.67 |
| 5  | 12  | -5  | -4.04 | 1.80 |
| 0  | -14 | -2  | -0.01 | 1.89 |
| 10 | -1  | 8   | 1.94  | 1.58 |
| 6  | -12 | 3   | 1.93  | 1.53 |
| 6  | -10 | 7   | 5.52  | 1.33 |
| 9  | -6  | -8  | 3.07  | 1.25 |
| 0  | -14 | 2   | -0.01 | 1.71 |
| 3  | -9  | 10  | -1.26 | 1.93 |
| 0  | 14  | -2  | -0.93 | 1.59 |
| 4  | -12 | -6  | 1.30  | 1.98 |
| 4  | -7  | 11  | 1.76  | 1.02 |
| 9  | 6   | -8  | 0.73  | 1.18 |
| 5  | 13  | 0   | 2.63  | 1.06 |
| 5  | -13 | 0   | 0.83  | 1.63 |
| 8  | -8  | 7   | 0.43  | 1.49 |
| 4  | 12  | -6  | 0.62  | 1.76 |
| 4  | 5   | 12  | -0.99 | 1.53 |
| 7  | 7   | 9   | 1.55  | 1.70 |
| 3  | -8  | -11 | -1.71 | 1.88 |
| 4  | -5  | 12  | -0.74 | 1.68 |
| 8  | 3   | 10  | 1.55  | 1.54 |
| 3  | 8   | -11 | 2.43  | 1.20 |
| 7  | -7  | 9   | -0.16 | 1.82 |
| 0  | -7  | -12 | 0.99  | 1.83 |
| 8  | -3  | 10  | 0.56  | 1.54 |
| 2  | 14  | 0   | 1.88  | 1.64 |
| 0  | 7   | 12  | 2.28  | 1.67 |
| 2  | 13  | 5   | -0.18 | 1.68 |
| 9  | 0   | -10 | 0.41  | 1.77 |
| 2  | -14 | 0   | 0.46  | 1.66 |
| 5  | 9   | 9   | 0.42  | 1.64 |
| 11 | 7   | 0   | 2.29  | 1.17 |
| 5  | -13 | -1  | 0.83  | 1.88 |
| 5  | 13  | -1  | -2.17 | 1.81 |
| 6  | -3  | -12 | -2.00 | 1.93 |
| 0  | 7   | -12 | 1.02  | 1.21 |
| 2  | -13 | 5   | -0.83 | 1.61 |
| 0  | -7  | 12  | 2.86  | 1.15 |
| 1  | -14 | -2  | -0.48 | 1.88 |
| 6  | 3   | -12 | 1.74  | 2.05 |
| 11 | -7  | 0   | -1.03 | 1.74 |
| 1  | -7  | -12 | 0.43  | 1.36 |
| 10 | 8   | 3   | -0.16 | 1.62 |
| 1  | 14  | -2  | 1.61  | 1.08 |
| 2  | 4   | 13  | 1.25  | 1.35 |
| 7  | 11  | 4   | -1.08 | 1.93 |
| 11 | 7   | -1  | -0.16 | 1.76 |
| 5  | -9  | 9   | -0.48 | 1.87 |
| 8  | 11  | 0   | -0.01 | 1.53 |
| 11 | -7  | -1  | 2.68  | 1.29 |
| 11 | -4  | -6  | 3.46  | 1.22 |
| 11 | 4   | -6  | 3.54  | 1.28 |
| 12 | 0   | 4   | 2.54  | 1.94 |
| 3  | 11  | 8   | -0.17 | 1.78 |
| 8  | -11 | 0   | -2.04 | 1.79 |

|    |     |     |       |      |
|----|-----|-----|-------|------|
| 3  | 3   | 13  | -0.29 | 1.44 |
| 10 | -8  | 3   | 0.58  | 1.47 |
| 8  | 7   | 8   | -0.01 | 1.68 |
| 1  | 14  | 2   | 1.73  | 1.54 |
| 2  | -4  | 13  | 0.28  | 1.45 |
| 5  | -11 | -7  | 2.03  | 1.91 |
| 1  | 7   | -12 | -1.01 | 1.91 |
| 2  | 12  | 7   | -0.50 | 1.64 |
| 6  | -11 | -6  | 1.03  | 1.75 |
| 1  | -14 | 2   | -1.73 | 1.80 |
| 7  | -11 | 4   | -4.74 | 2.11 |
| 5  | 10  | 8   | 3.39  | 1.22 |
| 3  | -3  | 13  | -0.44 | 1.47 |
| 5  | 13  | 1   | 1.16  | 1.80 |
| 5  | 11  | -7  | -3.78 | 1.93 |
| 3  | -11 | 8   | -1.00 | 1.67 |
| 6  | 11  | -6  | 0.49  | 1.77 |
| 9  | 10  | 0   | 1.80  | 1.20 |
| 3  | 6   | 12  | -1.14 | 1.71 |
| 8  | -7  | 8   | 1.31  | 1.63 |
| 11 | 6   | -4  | 4.17  | 1.32 |
| 2  | 14  | -1  | -0.01 | 1.76 |
| 2  | -14 | -1  | -0.01 | 1.63 |
| 8  | 11  | -1  | -1.92 | 1.90 |
| 9  | -10 | 0   | 1.82  | 1.71 |
| 11 | -6  | -4  | 4.16  | 1.25 |
| 5  | -13 | 1   | 0.83  | 1.84 |
| 2  | -12 | 7   | 1.42  | 1.16 |
| 8  | 0   | -11 | 1.40  | 1.65 |
| 8  | -11 | -1  | 3.37  | 1.14 |
| 9  | 1   | -10 | 2.25  | 1.76 |
| 9  | -1  | -10 | -2.27 | 1.87 |
| 5  | -10 | 8   | 2.42  | 1.32 |
| 12 | 3   | 3   | 4.12  | 1.42 |
| 3  | -6  | 12  | 3.61  | 1.10 |
| 2  | 14  | 1   | 0.79  | 1.74 |
| 9  | 3   | 9   | 1.42  | 1.34 |
| 9  | 10  | -1  | 0.90  | 1.71 |
| 9  | 9   | 4   | -0.60 | 1.66 |
| 2  | -14 | 1   | -0.33 | 1.59 |
| 9  | -3  | 9   | -0.72 | 1.35 |
| 9  | -10 | -1  | -0.47 | 1.65 |
| 12 | -3  | 3   | 4.16  | 1.35 |
| 4  | 0   | 13  | -1.28 | 1.49 |
| 11 | -2  | -7  | -0.87 | 1.78 |
| 12 | 1   | 4   | 0.56  | 1.47 |
| 9  | -9  | 4   | 1.93  | 1.42 |
| 11 | 2   | -7  | -1.29 | 1.65 |
| 7  | 10  | 6   | 2.44  | 1.24 |
| 12 | -1  | 4   | 1.90  | 1.22 |
| 6  | 0   | 12  | 1.97  | 1.64 |
| 6  | 5   | 11  | -2.15 | 1.98 |
| 7  | -10 | 6   | 5.97  | 1.12 |
| 8  | 9   | 6   | 1.45  | 1.41 |
| 8  | -1  | -11 | 0.26  | 1.99 |
| 8  | 1   | -11 | 1.28  | 1.74 |
| 6  | -5  | 11  | 2.18  | 1.66 |
| 4  | -10 | -9  | 3.44  | 1.38 |



|    |     |     |       |      |
|----|-----|-----|-------|------|
| 11 | 7   | 1   | 3.61  | 1.28 |
| 3  | -4  | -13 | 0.27  | 1.12 |
| 1  | 7   | 12  | 0.56  | 1.67 |
| 12 | 4   | 2   | -1.16 | 1.63 |
| 8  | 11  | 1   | 0.30  | 1.45 |
| 12 | -4  | 2   | -2.15 | 1.83 |
| 3  | 4   | -13 | -0.85 | 1.74 |
| 10 | 2   | 8   | 2.13  | 1.19 |
| 11 | -7  | 1   | 4.10  | 1.25 |
| 8  | -9  | 6   | 0.74  | 1.52 |
| 4  | 10  | -9  | -0.01 | 1.95 |
| 8  | -11 | 1   | -0.95 | 1.64 |
| 12 | 0   | -5  | 0.42  | 1.65 |
| 10 | -2  | 8   | 1.69  | 1.70 |
| 1  | -7  | 12  | 1.08  | 1.57 |
| 4  | 1   | 13  | 0.56  | 1.58 |
| 4  | -1  | 13  | 0.98  | 1.52 |
| 0  | 5   | 13  | 1.82  | 1.55 |
| 0  | -5  | -13 | 0.98  | 1.70 |
| 5  | 12  | 5   | 0.95  | 1.67 |
| 9  | 10  | 1   | -1.82 | 1.85 |
| 6  | -1  | 12  | 1.97  | 1.81 |
| 10 | -4  | -8  | -1.73 | 1.75 |
| 12 | -3  | -4  | 0.98  | 1.68 |
| 12 | 3   | -4  | 1.56  | 1.67 |
| 6  | 1   | 12  | 5.55  | 1.09 |
| 10 | 4   | -8  | -0.74 | 1.71 |
| 4  | 12  | 6   | -2.44 | 1.66 |
| 0  | -5  | 13  | 0.89  | 1.73 |
| 0  | 5   | -13 | 2.24  | 1.63 |
| 9  | -10 | 1   | 2.74  | 1.12 |
| 5  | 4   | 12  | 2.19  | 1.13 |
| 4  | -9  | -10 | -1.26 | 1.99 |
| 1  | -5  | -13 | 1.12  | 1.60 |
| 10 | -8  | -4  | 2.06  | 1.28 |
| 11 | 7   | -2  | -0.45 | 1.77 |
| 10 | 8   | -4  | 4.11  | 1.21 |
| 5  | -12 | 5   | 1.82  | 1.77 |
| 11 | 3   | 6   | 0.71  | 1.75 |
| 7  | 3   | 11  | 2.41  | 1.67 |
| 5  | 13  | -2  | 1.48  | 1.60 |
| 4  | -3  | -13 | 2.39  | 1.76 |
| 11 | -7  | -2  | 1.31  | 1.21 |
| 5  | -13 | -2  | 1.01  | 1.19 |
| 1  | 5   | -13 | 1.55  | 1.56 |
| 4  | 3   | -13 | 2.61  | 1.94 |
| 5  | -4  | 12  | 1.30  | 1.22 |
| 8  | -10 | -5  | 0.77  | 1.95 |
| 6  | 7   | 10  | 2.42  | 1.11 |
| 4  | 9   | -10 | 1.15  | 1.47 |
| 10 | 6   | 6   | 2.79  | 1.15 |
| 7  | -3  | 11  | 0.71  | 1.60 |
| 8  | 10  | -5  | 1.63  | 1.69 |
| 11 | -3  | 6   | 0.99  | 1.49 |
| 12 | 4   | -3  | 3.00  | 1.21 |
| 4  | -12 | 6   | -0.01 | 1.60 |
| 12 | -4  | -3  | 2.13  | 1.62 |
| 5  | -7  | -11 | 0.37  | 1.92 |

|    |     |     |       |      |
|----|-----|-----|-------|------|
| 5  | -5  | -12 | -5.37 | 2.41 |
| 12 | -1  | -5  | -5.74 | 2.08 |
| 10 | -6  | 6   | 3.88  | 1.23 |
| 6  | -6  | -11 | 2.89  | 1.38 |
| 2  | -7  | -12 | 1.95  | 1.66 |
| 12 | 1   | -5  | -4.30 | 1.95 |
| 5  | 5   | -12 | -0.90 | 2.01 |
| 6  | -12 | -4  | 0.68  | 1.77 |
| 6  | 6   | -11 | -2.31 | 1.88 |
| 6  | -7  | 10  | 2.36  | 1.73 |
| 5  | 7   | -11 | 1.02  | 1.58 |
| 5  | 8   | 10  | 0.70  | 1.66 |
| 6  | 12  | -4  | 2.78  | 1.08 |
| 2  | 7   | -12 | -0.54 | 1.93 |
| 8  | 11  | -2  | -1.64 | 1.88 |
| 8  | -11 | -2  | 1.10  | 1.75 |
| 10 | 7   | 5   | 1.72  | 1.67 |
| 4  | -6  | -12 | -0.20 | 1.88 |
| 4  | -13 | -4  | 1.62  | 1.84 |
| 9  | -10 | -2  | 0.75  | 1.68 |
| 9  | 10  | -2  | 0.60  | 1.86 |
| 4  | 6   | -12 | -1.79 | 1.80 |
| 5  | -8  | 10  | 1.81  | 1.49 |
| 2  | -14 | -2  | 0.45  | 1.92 |
| 10 | 0   | -9  | 0.40  | 1.76 |
| 4  | 13  | -4  | 1.11  | 1.73 |
| 10 | -7  | 5   | -0.47 | 1.76 |
| 2  | 14  | -2  | 1.56  | 1.48 |
| 9  | -2  | -10 | 1.53  | 2.06 |
| 9  | 2   | -10 | 3.29  | 1.33 |
| 5  | 13  | 2   | 0.99  | 2.04 |
| 8  | -5  | -10 | -0.61 | 1.87 |
| 3  | 8   | 11  | 1.43  | 1.62 |
| 5  | 0   | -13 | 0.16  | 2.22 |
| 0  | -10 | -10 | 1.26  | 1.72 |
| 2  | 14  | 2   | 1.61  | 1.63 |
| 0  | 14  | 3   | -4.18 | 1.94 |
| 0  | 10  | 10  | -2.11 | 1.95 |
| 3  | -12 | -7  | -1.18 | 1.98 |
| 0  | -14 | -3  | 0.30  | 1.68 |
| 8  | 5   | -10 | -2.83 | 1.91 |
| 5  | -13 | 2   | -0.19 | 1.71 |
| 12 | 2   | 4   | 2.57  | 1.98 |
| 12 | -2  | 4   | -0.17 | 1.89 |
| 0  | -14 | 3   | 1.70  | 1.75 |
| 2  | -14 | 2   | -0.51 | 1.96 |
| 3  | -13 | -5  | 0.14  | 1.65 |
| 7  | 12  | 0   | 1.63  | 1.65 |
| 0  | 14  | -3  | 1.86  | 1.53 |
| 1  | 5   | 13  | 1.83  | 1.56 |
| 3  | 13  | -5  | -2.09 | 1.98 |
| 7  | -12 | 0   | -1.01 | 1.77 |
| 3  | -8  | 11  | -0.18 | 1.70 |
| 3  | 12  | -7  | 1.26  | 1.63 |
| 0  | 10  | -10 | 0.33  | 1.66 |
| 0  | -10 | 10  | 1.88  | 1.57 |
| 1  | -5  | 13  | 1.03  | 1.60 |
| 10 | -1  | -9  | -2.17 | 1.74 |

|    |     |     |       |      |
|----|-----|-----|-------|------|
| 10 | 1   | -9  | -0.60 | 1.73 |
| 9  | -9  | -5  | 1.65  | 1.52 |
| 8  | -2  | -11 | -0.31 | 1.63 |
| 8  | 2   | -11 | -0.17 | 1.84 |
| 1  | -10 | -10 | 1.16  | 1.43 |
| 7  | -9  | -8  | -1.50 | 1.82 |
| 7  | 12  | -1  | 1.31  | 1.90 |
| 9  | 9   | -5  | 0.61  | 1.72 |
| 12 | 5   | 0   | 5.72  | 1.13 |
| 12 | -5  | 0   | -0.17 | 1.87 |
| 7  | -12 | -1  | 1.30  | 1.74 |
| 4  | -11 | -8  | 2.71  | 1.90 |
| 7  | 9   | -8  | -2.43 | 1.82 |
| 12 | 5   | -1  | 3.09  | 1.36 |
| 5  | 1   | -13 | -0.61 | 2.04 |
| 1  | 10  | -10 | 1.00  | 1.98 |
| 4  | 2   | 13  | 3.14  | 1.06 |
| 5  | -1  | -13 | -1.22 | 1.72 |
| 12 | -5  | -1  | 4.61  | 1.34 |
| 0  | -11 | -9  | 2.17  | 1.71 |
| 0  | 11  | 9   | 2.00  | 1.80 |
| 1  | -14 | -3  | 2.21  | 1.62 |
| 7  | -11 | -5  | -0.36 | 1.87 |
| 4  | -2  | 13  | 0.41  | 1.60 |
| 7  | -8  | -9  | -0.68 | 1.96 |
| 5  | 11  | 7   | -0.10 | 1.10 |
| 7  | 11  | -5  | 0.49  | 1.80 |
| 6  | 2   | 12  | 0.41  | 1.56 |
| 4  | 11  | -8  | -1.81 | 1.83 |
| 1  | 14  | -3  | 0.45  | 1.65 |
| 9  | -5  | -9  | -0.31 | 1.66 |
| 2  | -5  | -13 | -0.74 | 1.55 |
| 6  | -2  | 12  | 0.12  | 1.58 |
| 0  | -11 | 9   | -0.71 | 1.80 |
| 10 | 9   | 0   | -3.34 | 1.82 |
| 6  | 11  | 6   | 1.98  | 1.47 |
| 9  | 5   | -9  | 2.71  | 1.10 |
| 0  | 11  | -9  | -0.02 | 1.73 |
| 8  | 11  | 2   | -0.96 | 1.76 |
| 2  | 5   | -13 | 0.15  | 1.53 |
| 7  | 8   | -9  | 0.66  | 2.10 |
| 1  | 14  | 3   | -0.51 | 1.72 |
| 0  | -13 | -6  | -2.21 | 2.01 |
| 10 | -9  | 0   | 0.27  | 1.90 |
| 0  | 13  | 6   | -1.20 | 1.88 |
| 5  | -11 | 7   | 1.62  | 1.69 |
| 11 | 7   | 2   | -0.31 | 1.60 |
| 8  | -11 | 2   | -1.46 | 1.82 |
| 1  | -11 | -9  | 0.49  | 2.01 |
| 4  | 13  | 4   | 1.43  | 1.16 |
| 1  | -14 | 3   | -1.46 | 1.73 |
| 7  | 12  | 1   | 0.39  | 1.24 |
| 6  | -11 | 6   | -0.51 | 1.84 |
| 11 | -7  | 2   | 2.07  | 1.06 |
| 0  | 0   | -14 | 0.56  | 1.48 |
| 9  | 7   | 7   | -0.32 | 1.78 |
| 8  | 6   | 9   | 0.27  | 1.48 |
| 0  | 0   | 14  | 1.57  | 1.26 |

|    |     |     |       |      |
|----|-----|-----|-------|------|
| 10 | 9   | -1  | -0.63 | 1.59 |
| 10 | -9  | -1  | -3.35 | 1.67 |
| 0  | 13  | -6  | 4.01  | 1.16 |
| 0  | -13 | 6   | 1.02  | 1.25 |
| 12 | -2  | -5  | 1.27  | 1.96 |
| 3  | 14  | 0   | -0.19 | 1.88 |
| 12 | 2   | -5  | -0.03 | 1.98 |
| 7  | -12 | 1   | -0.51 | 1.59 |
| 1  | 0   | -14 | -1.89 | 1.50 |
| 3  | -14 | 0   | 1.30  | 1.53 |
| 9  | 10  | 2   | -2.31 | 1.69 |
| 1  | 11  | -9  | 1.65  | 1.62 |
| 9  | -7  | 7   | 3.64  | 1.07 |
| 4  | -13 | 4   | -0.36 | 1.60 |
| 8  | -6  | 9   | -0.47 | 1.61 |
| 1  | 10  | 10  | -3.15 | 1.70 |
| 11 | -3  | -7  | -1.04 | 1.87 |
| 11 | 3   | -7  | -1.76 | 1.88 |
| 11 | 5   | 5   | 1.28  | 1.73 |
| 8  | -8  | -8  | 2.49  | 1.46 |
| 9  | -10 | 2   | -0.18 | 1.89 |
| 10 | 5   | 7   | 2.08  | 1.19 |
| 8  | 8   | -8  | 2.78  | 1.37 |
| 3  | 13  | 5   | -1.22 | 1.96 |
| 9  | 8   | 6   | -3.11 | 1.71 |
| 10 | -5  | 7   | 3.00  | 1.08 |
| 2  | 7   | 12  | 0.70  | 1.70 |
| 1  | -13 | -6  | -1.36 | 2.06 |
| 11 | -5  | 5   | -1.20 | 1.71 |
| 6  | 12  | 4   | -1.15 | 1.81 |
| 7  | 0   | -12 | -1.35 | 1.85 |
| 8  | 4   | 10  | 2.16  | 1.49 |
| 1  | -10 | 10  | -1.23 | 1.88 |
| 6  | -9  | -9  | -3.21 | 2.21 |
| 3  | -13 | 5   | 1.00  | 1.14 |
| 9  | -8  | 6   | 1.03  | 1.57 |
| 6  | -12 | 4   | 0.31  | 1.80 |
| 12 | 5   | 1   | 3.40  | 1.46 |
| 8  | -4  | 10  | -1.93 | 1.64 |
| 1  | 13  | -6  | 2.61  | 1.11 |
| 0  | 1   | 14  | 2.37  | 1.10 |
| 0  | -1  | 14  | 2.31  | 1.01 |
| 6  | 9   | -9  | -0.55 | 2.14 |
| 4  | 10  | 9   | -0.17 | 1.61 |
| 0  | 1   | -14 | 2.01  | 1.52 |
| 0  | -1  | -14 | 1.71  | 1.84 |
| 10 | 3   | 8   | -0.61 | 1.73 |
| 2  | -7  | 12  | 1.53  | 1.64 |
| 11 | 6   | 4   | -0.02 | 1.56 |
| 12 | -5  | 1   | 3.62  | 1.34 |
| 3  | -14 | -1  | 2.10  | 1.61 |
| 7  | 6   | 10  | -0.31 | 1.54 |
| 3  | 14  | -1  | -0.03 | 1.95 |
| 6  | -4  | -12 | 1.85  | 1.26 |
| 10 | -3  | 8   | 0.85  | 1.42 |
| 1  | -1  | -14 | 0.42  | 1.40 |
| 11 | 7   | -3  | 0.12  | 2.00 |
| 6  | 4   | -12 | -1.48 | 1.93 |

|    |     |     |       |      |
|----|-----|-----|-------|------|
| 1  | 11  | 9   | -3.16 | 2.17 |
| 1  | 1   | -14 | -0.16 | 1.38 |
| 11 | -6  | 4   | 0.28  | 1.60 |
| 11 | -7  | -3  | 0.42  | 1.81 |
| 3  | 12  | 7   | 1.50  | 1.43 |
| 10 | 9   | 1   | 0.57  | 1.98 |
| 4  | -10 | 9   | -0.83 | 1.55 |
| 7  | -6  | 10  | 1.18  | 1.48 |
| 10 | -7  | -6  | 3.51  | 1.34 |
| 3  | 14  | 1   | -1.51 | 1.96 |
| 10 | 6   | -7  | -1.23 | 1.79 |
| 10 | 7   | -6  | 2.55  | 2.00 |
| 1  | 13  | 6   | -1.18 | 1.66 |
| 10 | -6  | -7  | -1.80 | 1.74 |
| 3  | 4   | 13  | -1.70 | 1.68 |
| 3  | -14 | 1   | 0.35  | 1.69 |
| 10 | -9  | 1   | -0.13 | 1.81 |
| 0  | -9  | -11 | -0.29 | 1.49 |
| 0  | 9   | 11  | 0.63  | 1.49 |
| 12 | 5   | -2  | 3.27  | 1.21 |
| 12 | -5  | -2  | 2.06  | 1.72 |
| 4  | -8  | -11 | -1.81 | 1.97 |
| 7  | -1  | -12 | -1.56 | 1.73 |
| 1  | -11 | 9   | -1.40 | 1.78 |
| 7  | 1   | -12 | 0.49  | 2.01 |
| 3  | -4  | 13  | 0.17  | 1.64 |
| 3  | -12 | 7   | 0.70  | 1.55 |
| 7  | 12  | -2  | 0.11  | 1.34 |
| 7  | -12 | -2  | -2.33 | 1.91 |
| 7  | -5  | -11 | -0.27 | 1.86 |
| 5  | -13 | -3  | 0.02  | 1.84 |
| 1  | -13 | 6   | 1.84  | 1.16 |
| 5  | 13  | -3  | -1.14 | 1.86 |
| 10 | 2   | -9  | 2.06  | 1.43 |
| 4  | 8   | -11 | -0.67 | 1.58 |
| 10 | -2  | -9  | 2.56  | 1.38 |
| 0  | -9  | 11  | -2.57 | 1.77 |
| 0  | 9   | -11 | -0.50 | 1.72 |
| 7  | 5   | -11 | -2.69 | 2.17 |
| 2  | -10 | -10 | -0.33 | 1.75 |
| 1  | -9  | -11 | -0.46 | 1.77 |
| 12 | 4   | 3   | 5.21  | 1.38 |
| 8  | -9  | -7  | -1.39 | 1.82 |
| 9  | 4   | 9   | -0.85 | 1.74 |
| 8  | 9   | -7  | 0.69  | 1.72 |
| 12 | -4  | 3   | 5.69  | 1.29 |
| 5  | -2  | -13 | 1.90  | 1.55 |
| 8  | -11 | -3  | 3.18  | 1.17 |
| 8  | 11  | -3  | -0.97 | 1.86 |
| 1  | 0   | 14  | 1.46  | 0.97 |
| 9  | -4  | 9   | -0.42 | 1.58 |
| 6  | -10 | -8  | 1.27  | 1.27 |
| 2  | 10  | -10 | -0.15 | 1.53 |
| 5  | 2   | -13 | 0.02  | 1.89 |
| 9  | 10  | -3  | 0.97  | 1.60 |
| 10 | 8   | 4   | -1.75 | 1.70 |
| 9  | -10 | -3  | -2.78 | 1.79 |
| 1  | 9   | -11 | 0.72  | 1.59 |

|    |     |     |       |      |
|----|-----|-----|-------|------|
| 4  | 9   | 10  | -1.16 | 1.69 |
| 10 | 9   | -2  | 1.86  | 1.63 |
| 11 | 0   | 7   | 8.24  | 1.66 |
| 6  | 10  | -8  | 1.56  | 1.70 |
| 10 | -9  | -2  | 1.39  | 1.64 |
| 8  | 10  | 5   | 2.23  | 1.23 |
| 10 | -8  | 4   | 1.23  | 1.74 |
| 3  | -7  | -12 | 0.51  | 1.80 |
| 4  | -9  | 10  | -0.62 | 1.71 |
| 7  | -10 | -7  | -0.65 | 1.99 |
| 8  | -7  | -9  | -1.48 | 1.90 |
| 8  | -10 | 5   | 0.65  | 1.79 |
| 3  | 7   | -12 | -0.68 | 1.84 |
| 8  | 7   | -9  | -0.96 | 1.96 |
| 7  | 10  | -7  | -1.36 | 1.97 |
| 2  | 0   | -14 | 0.90  | 1.60 |
| 2  | -14 | -3  | 0.03  | 1.88 |
| 9  | -3  | -10 | -0.55 | 2.00 |
| 2  | 14  | -3  | -1.72 | 1.79 |
| 9  | 3   | -10 | 1.66  | 1.85 |
| 2  | -11 | -9  | 0.55  | 1.79 |
| 2  | 5   | 13  | -0.85 | 1.54 |
| 1  | 1   | 14  | -2.45 | 1.67 |
| 1  | -1  | 14  | 0.96  | 1.08 |
| 2  | 11  | -9  | 0.52  | 1.82 |
| 12 | 3   | 4   | 2.37  | 1.63 |
| 9  | 6   | 8   | 1.93  | 1.17 |
| 11 | 1   | 7   | -0.71 | 1.79 |
| 12 | -3  | 4   | -0.41 | 1.69 |
| 11 | 5   | -6  | 1.58  | 1.35 |
| 11 | -1  | 7   | -1.42 | 1.89 |
| 6  | -8  | -10 | 0.56  | 2.10 |
| 11 | -5  | -6  | 0.76  | 1.85 |
| 2  | -5  | 13  | 0.32  | 1.54 |
| 12 | 4   | -4  | -1.30 | 1.66 |
| 12 | -4  | -4  | 0.90  | 1.28 |
| 11 | -6  | -5  | 2.54  | 1.84 |
| 1  | 9   | 11  | -2.73 | 1.71 |
| 11 | 6   | -5  | 0.92  | 1.79 |
| 7  | 12  | 2   | -2.76 | 1.89 |
| 6  | 8   | -10 | -1.55 | 2.08 |
| 4  | 11  | 8   | 0.02  | 1.48 |
| 4  | -4  | -13 | 2.10  | 1.47 |
| 9  | -6  | 8   | 0.77  | 1.75 |
| 2  | 14  | 3   | 0.52  | 1.56 |
| 5  | 13  | 3   | 2.33  | 1.17 |
| 11 | 4   | 6   | 4.35  | 1.29 |
| 7  | 4   | 11  | 1.48  | 1.46 |
| 8  | -3  | -11 | 1.07  | 2.22 |
| 7  | -12 | 2   | 2.02  | 1.68 |
| 2  | -1  | -14 | -1.87 | 1.67 |
| 8  | 3   | -11 | 5.00  | 1.35 |
| 0  | -2  | -14 | -0.56 | 1.47 |
| 0  | 2   | 14  | 1.96  | 0.93 |
| 4  | 4   | -13 | 0.02  | 1.95 |
| 11 | -4  | 6   | 2.22  | 1.35 |
| 3  | -14 | -2  | -0.63 | 1.67 |
| 2  | -13 | -6  | -1.13 | 1.89 |

|    |     |     |       |      |
|----|-----|-----|-------|------|
| 2  | -14 | 3   | 1.34  | 1.86 |
| 1  | -9  | 11  | 0.87  | 1.75 |
| 0  | -2  | 14  | 0.17  | 1.68 |
| 2  | 1   | -14 | -0.72 | 1.59 |
| 3  | 14  | -2  | -0.46 | 1.80 |
| 5  | -13 | 3   | 0.37  | 1.22 |
| 7  | -4  | 11  | 0.17  | 1.59 |
| 0  | 2   | -14 | 0.62  | 1.66 |
| 7  | -7  | -10 | 0.35  | 1.90 |
| 4  | -11 | 8   | 2.20  | 1.70 |
| 5  | -12 | -6  | -1.71 | 2.19 |
| 1  | -2  | -14 | 1.76  | 1.70 |
| 2  | 13  | -6  | -1.42 | 1.73 |
| 4  | 3   | 13  | -1.14 | 1.45 |
| 5  | 12  | -6  | -2.31 | 1.76 |
| 1  | 2   | -14 | -1.17 | 1.74 |
| 7  | 7   | -10 | 2.56  | 1.21 |
| 7  | 11  | 5   | -1.85 | 1.75 |
| 0  | 12  | 8   | -0.15 | 1.90 |
| 0  | -12 | -8  | 0.19  | 1.72 |
| 6  | 3   | 12  | 1.62  | 1.42 |
| 4  | -3  | 13  | 0.17  | 1.70 |
| 4  | 6   | 12  | 3.29  | 1.17 |
| 7  | -2  | -12 | -0.55 | 1.88 |
| 6  | -3  | 12  | -0.13 | 1.39 |
| 0  | -12 | 8   | 0.53  | 1.82 |
| 0  | 12  | -8  | 0.02  | 1.65 |
| 7  | -11 | 5   | -1.77 | 1.79 |
| 7  | 2   | -12 | -0.45 | 1.93 |
| 4  | -6  | 12  | 4.51  | 1.26 |
| 2  | 10  | 10  | -0.92 | 1.62 |
| 3  | 14  | 2   | -3.50 | 2.04 |
| 12 | 0   | 5   | 1.48  | 1.55 |
| 3  | -5  | -13 | 0.02  | 1.59 |
| 3  | -14 | 2   | 1.52  | 1.33 |
| 5  | 7   | 11  | -0.41 | 1.74 |
| 12 | 5   | 2   | -1.01 | 1.80 |
| 1  | -12 | -8  | -0.15 | 1.99 |
| 2  | -9  | -11 | 1.64  | 1.27 |
| 12 | -5  | 2   | -1.16 | 1.64 |
| 3  | 5   | -13 | -1.39 | 1.71 |
| 12 | -3  | -5  | 0.91  | 1.93 |
| 12 | 3   | -5  | 1.93  | 1.65 |
| 2  | -10 | 10  | -2.87 | 1.96 |
| 5  | -7  | 11  | -0.59 | 1.85 |
| 9  | 9   | 5   | 1.52  | 1.17 |
| 10 | 9   | 2   | 4.35  | 1.25 |
| 1  | 12  | -8  | -1.29 | 1.92 |
| 2  | 9   | -11 | -0.15 | 1.75 |
| 10 | -9  | 2   | 0.34  | 2.07 |
| 10 | -8  | -5  | 1.08  | 1.64 |
| 10 | 8   | -5  | 0.03  | 2.01 |
| 10 | -5  | -8  | -2.94 | 1.87 |
| 13 | 0   | 0   | -2.19 | 1.82 |
| 8  | 11  | 3   | -3.77 | 1.85 |
| 10 | 5   | -8  | -1.65 | 1.74 |
| 2  | 11  | 9   | -0.15 | 1.77 |
| 9  | -9  | 5   | 1.40  | 1.22 |

|    |     |     |       |      |
|----|-----|-----|-------|------|
| 13 | 0   | -1  | 1.78  | 1.81 |
| 5  | 5   | 12  | 1.84  | 1.19 |
| 2  | 13  | 6   | -1.03 | 1.75 |
| 0  | -14 | -4  | -2.13 | 1.93 |
| 12 | 1   | 5   | 1.34  | 1.56 |
| 8  | -11 | 3   | 0.17  | 1.74 |
| 0  | 14  | 4   | -1.30 | 2.00 |
| 12 | -1  | 5   | -0.57 | 1.81 |
| 0  | 14  | -4  | -2.40 | 1.83 |
| 0  | -14 | 4   | 1.78  | 1.19 |
| 11 | 7   | 3   | 4.57  | 1.31 |
| 2  | -13 | 6   | 1.72  | 1.60 |
| 9  | -8  | -7  | 1.61  | 1.22 |
| 5  | -5  | 12  | 1.22  | 1.79 |
| 12 | -5  | -3  | -0.13 | 1.94 |
| 2  | -11 | 9   | 2.10  | 1.71 |
| 12 | 5   | -3  | 2.09  | 1.90 |
| 9  | 8   | -7  | 1.70  | 1.24 |
| 9  | 10  | 3   | 1.86  | 1.65 |
| 11 | -7  | 3   | 4.41  | 1.15 |
| 1  | 2   | 14  | 0.88  | 1.47 |
| 1  | 12  | 8   | -0.16 | 1.89 |
| 9  | -7  | -8  | -1.36 | 1.69 |
| 9  | 7   | -8  | -1.10 | 1.98 |
| 1  | -2  | 14  | -1.18 | 1.70 |
| 6  | -12 | -5  | 0.19  | 2.10 |
| 9  | -10 | 3   | -3.14 | 1.71 |
| 11 | 0   | -8  | -1.75 | 1.80 |
| 11 | 2   | 7   | 5.65  | 1.25 |
| 13 | -1  | 0   | 2.37  | 1.90 |
| 1  | -12 | 8   | 1.22  | 1.80 |
| 13 | 1   | 0   | -1.02 | 1.85 |
| 6  | 12  | -5  | -0.33 | 2.01 |
| 7  | -12 | -3  | -1.19 | 2.01 |
| 11 | -2  | 7   | 3.02  | 1.11 |
| 5  | -10 | -9  | -1.97 | 2.13 |
| 7  | 12  | -3  | -1.90 | 1.81 |
| 1  | -14 | -4  | -1.13 | 1.87 |
| 13 | 1   | -1  | 8.54  | 1.52 |
| 13 | -1  | -1  | 6.97  | 1.42 |
| 6  | 6   | 11  | 1.49  | 1.76 |
| 4  | -12 | -7  | 4.29  | 1.39 |
| 10 | -3  | -9  | 3.94  | 1.31 |
| 5  | 10  | -9  | 2.80  | 1.15 |
| 10 | 3   | -9  | 3.72  | 1.29 |
| 6  | -6  | 11  | 0.77  | 1.39 |
| 4  | -13 | -5  | -1.00 | 1.90 |
| 12 | 0   | -6  | 6.20  | 1.37 |
| 4  | 12  | -7  | 1.16  | 1.67 |
| 1  | 14  | -4  | 0.17  | 1.72 |
| 9  | 0   | 10  | -1.46 | 1.66 |
| 2  | -2  | -14 | -2.33 | 1.73 |
| 7  | 9   | 8   | 0.46  | 1.59 |
| 2  | 0   | 14  | 1.92  | 1.61 |
| 10 | -9  | -3  | 1.40  | 1.63 |
| 10 | 9   | -3  | -2.02 | 1.75 |
| 2  | 2   | -14 | 0.92  | 1.78 |
| 6  | 13  | 0   | 2.28  | 1.77 |



|    |     |     |       |      |
|----|-----|-----|-------|------|
| 4  | 13  | -5  | -0.24 | 1.29 |
| 5  | -3  | -13 | 1.88  | 1.78 |
| 1  | 14  | 4   | -2.50 | 2.03 |
| 5  | 3   | -13 | -2.12 | 1.91 |
| 6  | -13 | 0   | 0.89  | 1.76 |
| 5  | -9  | -10 | -0.92 | 1.94 |
| 7  | -9  | 8   | -0.15 | 1.68 |
| 0  | 6   | 13  | -0.14 | 1.56 |
| 11 | 4   | -7  | -0.29 | 1.74 |
| 11 | -4  | -7  | -0.58 | 1.82 |
| 0  | -6  | -13 | -1.60 | 1.73 |
| 1  | -14 | 4   | 1.00  | 1.67 |
| 11 | 1   | -8  | 1.78  | 1.81 |
| 11 | -1  | -8  | 1.78  | 1.65 |
| 13 | 0   | 1   | 12.87 | 1.44 |
| 5  | 9   | -10 | 1.04  | 1.73 |
| 5  | 0   | 13  | -1.01 | 1.75 |
| 8  | 0   | 11  | -1.17 | 1.47 |
| 0  | -6  | 13  | 0.01  | 1.75 |
| 0  | 6   | -13 | 2.49  | 1.08 |
| 3  | -10 | -10 | -0.71 | 2.00 |
| 1  | -6  | -13 | -0.29 | 1.53 |
| 4  | 8   | 11  | -0.59 | 1.65 |
| 6  | -13 | -1  | 2.47  | 1.79 |
| 6  | -11 | -7  | 2.00  | 2.11 |
| 3  | 7   | 12  | -2.65 | 1.70 |
| 6  | 13  | -1  | -2.09 | 1.82 |
| 11 | -7  | -4  | 1.30  | 1.19 |
| 12 | 1   | -6  | 1.05  | 1.82 |
| 12 | -1  | -6  | 0.90  | 1.78 |
| 13 | 0   | -2  | -1.33 | 1.69 |
| 3  | 10  | -10 | 0.01  | 1.79 |
| 9  | 1   | 10  | -1.91 | 1.73 |
| 11 | 7   | -4  | 1.39  | 1.81 |
| 1  | 6   | -13 | -0.49 | 1.93 |
| 2  | 1   | 14  | -1.47 | 1.42 |
| 8  | -10 | -6  | -0.48 | 1.94 |
| 9  | -1  | 10  | -2.05 | 1.56 |
| 10 | 4   | 8   | 2.09  | 1.52 |
| 5  | -6  | -12 | 2.42  | 2.19 |
| 2  | -1  | 14  | -0.88 | 1.49 |
| 8  | 10  | -6  | 0.36  | 1.90 |
| 6  | 11  | -7  | 0.19  | 2.04 |
| 3  | -7  | 12  | -0.30 | 1.74 |
| 10 | -4  | 8   | 0.31  | 1.61 |
| 4  | -8  | 11  | 1.59  | 1.05 |
| 2  | 9   | 11  | 0.62  | 1.53 |
| 2  | -12 | -8  | -0.50 | 2.10 |
| 5  | 6   | -12 | 2.35  | 1.66 |
| 3  | 0   | -14 | 0.76  | 1.55 |
| 5  | 12  | 6   | -0.81 | 2.13 |
| 6  | 9   | 9   | -2.71 | 1.74 |
| 7  | 8   | 9   | 0.16  | 1.60 |
| 13 | -1  | 1   | 0.90  | 1.89 |
| 13 | 1   | 1   | 1.36  | 1.77 |
| 8  | 1   | 11  | -2.21 | 1.80 |
| 5  | 1   | 13  | 3.71  | 1.12 |
| 2  | -9  | 11  | 1.51  | 1.71 |

|    |     |     |       |      |
|----|-----|-----|-------|------|
| 6  | 13  | 1   | 1.41  | 1.83 |
| 8  | -1  | 11  | 3.18  | 1.02 |
| 5  | -1  | 13  | -0.28 | 1.76 |
| 2  | 12  | -8  | -0.48 | 1.77 |
| 5  | -12 | 6   | 1.91  | 2.14 |
| 12 | 2   | 5   | 4.29  | 1.47 |
| 3  | -11 | -9  | 0.02  | 2.16 |
| 6  | -13 | 1   | 1.77  | 1.30 |
| 5  | -13 | -4  | 0.72  | 1.92 |
| 12 | -2  | 5   | 4.98  | 1.35 |
| 6  | -9  | 9   | -0.15 | 1.70 |
| 7  | -8  | 9   | 3.82  | 0.99 |
| 13 | 1   | -2  | 0.46  | 1.84 |
| 0  | 8   | 12  | 0.16  | 1.64 |
| 13 | -1  | -2  | 1.35  | 1.73 |
| 5  | 13  | -4  | 1.53  | 1.78 |
| 0  | -8  | -12 | 0.01  | 1.55 |
| 0  | 3   | 14  | -0.43 | 1.85 |
| 0  | -3  | -14 | 1.48  | 1.55 |
| 4  | 14  | 0   | 0.52  | 1.75 |
| 8  | -11 | -4  | 1.59  | 1.27 |
| 6  | 10  | 8   | 0.17  | 1.82 |
| 3  | -14 | -3  | -0.65 | 2.04 |
| 0  | 3   | -14 | -1.36 | 1.77 |
| 3  | 11  | -9  | 2.16  | 1.58 |
| 8  | 11  | -4  | 2.25  | 1.85 |
| 4  | -14 | 0   | 0.70  | 1.81 |
| 11 | 8   | 0   | 0.32  | 1.88 |
| 0  | -3  | 14  | 0.32  | 1.56 |
| 9  | -10 | -4  | 0.81  | 1.95 |
| 9  | 10  | -4  | -2.13 | 1.93 |
| 3  | 14  | -3  | -1.63 | 1.86 |
| 1  | -3  | -14 | 0.53  | 1.21 |
| 0  | -8  | 12  | 0.53  | 1.71 |
| 11 | -8  | 0   | 1.09  | 1.65 |
| 0  | 8   | -12 | 3.96  | 1.07 |
| 1  | -8  | -12 | 0.95  | 1.83 |
| 1  | 3   | -14 | 0.32  | 1.69 |
| 8  | -6  | -10 | -4.74 | 1.98 |
| 3  | 1   | -14 | -1.53 | 1.70 |
| 3  | -1  | -14 | -1.33 | 1.73 |
| 11 | 8   | -1  | 3.53  | 1.28 |
| 8  | 6   | -10 | 0.68  | 1.72 |
| 8  | 8   | 8   | -3.00 | 1.76 |
| 11 | -8  | -1  | -0.45 | 1.83 |
| 7  | 12  | 3   | 2.58  | 1.35 |
| 6  | -10 | 8   | 2.39  | 1.28 |
| 1  | 6   | 13  | 0.90  | 1.40 |
| 13 | 2   | 0   | -0.59 | 1.73 |
| 13 | -2  | 0   | 0.61  | 1.65 |
| 13 | 2   | -1  | 1.51  | 1.71 |
| 1  | 8   | -12 | 0.90  | 1.63 |
| 7  | -3  | -12 | 0.32  | 1.96 |
| 7  | 10  | 7   | -1.38 | 1.67 |
| 7  | -12 | 3   | -1.00 | 1.99 |
| 13 | -2  | -1  | 0.61  | 1.61 |
| 8  | 5   | 10  | -0.59 | 1.65 |
| 7  | 3   | -12 | -0.66 | 2.08 |

|    |     |     |       |      |
|----|-----|-----|-------|------|
| 4  | 13  | 5   | 1.58  | 1.93 |
| 4  | 14  | -1  | -0.33 | 1.88 |
| 3  | -13 | -6  | 0.35  | 1.90 |
| 1  | -6  | 13  | -2.20 | 1.67 |
| 8  | -8  | 8   | 0.47  | 1.54 |
| 4  | -14 | -1  | -0.16 | 1.87 |
| 9  | -9  | -6  | -1.25 | 1.75 |
| 10 | 7   | 6   | 1.68  | 1.99 |
| 8  | -5  | 10  | 0.47  | 1.56 |
| 7  | -10 | 7   | 1.64  | 1.77 |
| 5  | -11 | -8  | 2.15  | 1.75 |
| 9  | -4  | -10 | 3.90  | 1.41 |
| 12 | 6   | 0   | 0.92  | 1.61 |
| 9  | 9   | -6  | 0.18  | 2.03 |
| 6  | -5  | -12 | -1.11 | 1.45 |
| 8  | 9   | 7   | 2.37  | 1.07 |
| 3  | 13  | -6  | -0.48 | 1.77 |
| 9  | 4   | -10 | 2.49  | 1.88 |
| 4  | -13 | 5   | 0.19  | 2.07 |
| 12 | -6  | 0   | 1.00  | 1.21 |
| 6  | -7  | -11 | -1.26 | 2.22 |
| 2  | -14 | -4  | 2.65  | 1.88 |
| 12 | 6   | -1  | 2.51  | 1.22 |
| 10 | -7  | 6   | 2.63  | 1.76 |
| 5  | 11  | -8  | -2.70 | 1.83 |
| 3  | 14  | 3   | 0.87  | 1.58 |
| 12 | -6  | -1  | -1.50 | 1.79 |
| 4  | 14  | 1   | -0.68 | 2.04 |
| 6  | 5   | -12 | 0.38  | 2.00 |
| 2  | 14  | -4  | 1.55  | 1.19 |
| 8  | -9  | 7   | 1.27  | 1.51 |
| 12 | 4   | 4   | -1.94 | 1.72 |
| 6  | 7   | -11 | -3.78 | 2.05 |
| 3  | 5   | 13  | -0.28 | 1.69 |
| 4  | -14 | 1   | 0.18  | 1.80 |
| 11 | 2   | -8  | 2.54  | 1.74 |
| 11 | -2  | -8  | -3.12 | 1.88 |
| 2  | 12  | 8   | -1.53 | 1.86 |
| 7  | -11 | -6  | 1.07  | 1.92 |
| 12 | -4  | 4   | 0.31  | 1.65 |
| 9  | -6  | -9  | 2.16  | 1.73 |
| 6  | 13  | -2  | 0.89  | 1.32 |
| 2  | -6  | -13 | -0.60 | 1.72 |
| 3  | -9  | -11 | -2.55 | 2.23 |
| 3  | -14 | 3   | 1.38  | 1.59 |
| 4  | 12  | 7   | 1.17  | 1.36 |
| 6  | 12  | 5   | 2.83  | 2.13 |
| 6  | -13 | -2  | -0.88 | 1.91 |
| 7  | 11  | -6  | 1.61  | 1.97 |
| 9  | 6   | -9  | 0.81  | 1.79 |
| 4  | -7  | -12 | -1.10 | 2.03 |
| 2  | 6   | -13 | 1.42  | 1.24 |
| 10 | 0   | 9   | -1.48 | 1.72 |
| 3  | -5  | 13  | 0.32  | 1.53 |
| 3  | 9   | -11 | 0.36  | 1.92 |
| 4  | 7   | -12 | -0.16 | 2.05 |
| 8  | -4  | -11 | 0.32  | 1.96 |
| 12 | -2  | -6  | 1.21  | 1.77 |

|    |     |     |       |      |
|----|-----|-----|-------|------|
| 2  | -12 | 8   | 0.54  | 1.70 |
| 9  | 2   | 10  | 0.61  | 1.67 |
| 11 | 8   | 1   | -1.67 | 1.76 |
| 12 | 2   | -6  | 2.49  | 1.32 |
| 6  | -12 | 5   | 1.21  | 1.89 |
| 1  | 8   | 12  | -0.60 | 1.68 |
| 2  | 2   | 14  | -1.33 | 1.52 |
| 8  | 4   | -11 | -0.47 | 1.87 |
| 4  | -12 | 7   | -0.34 | 1.71 |
| 9  | -2  | 10  | 1.35  | 1.57 |
| 12 | 5   | 3   | 2.65  | 1.17 |
| 11 | -8  | 1   | 0.01  | 1.65 |
| 9  | 5   | 9   | -1.04 | 1.83 |
| 2  | -2  | 14  | -2.84 | 1.83 |
| 1  | 3   | 14  | 2.67  | 1.12 |
| 6  | 0   | -13 | 0.90  | 2.03 |
| 12 | -5  | 3   | 3.26  | 1.19 |
| 4  | 4   | 13  | 1.94  | 1.51 |
| 1  | -3  | 14  | 1.63  | 1.23 |
| 2  | 14  | 4   | 0.53  | 1.87 |
| 9  | -5  | 9   | -1.67 | 1.55 |
| 10 | 9   | 3   | 1.71  | 1.21 |
| 6  | 4   | 12  | 2.25  | 1.62 |
| 11 | 3   | 7   | 0.31  | 1.58 |
| 11 | 6   | 5   | 0.77  | 1.28 |
| 10 | 6   | 7   | -0.59 | 1.97 |
| 1  | -8  | 12  | -0.66 | 1.71 |
| 4  | -4  | 13  | 3.15  | 1.15 |
| 10 | -9  | 3   | 1.58  | 1.83 |
| 13 | 2   | 1   | 0.32  | 2.10 |
| 5  | 2   | 13  | 1.20  | 1.43 |
| 5  | 13  | 4   | 2.97  | 2.08 |
| 8  | 2   | 11  | -0.29 | 1.71 |
| 11 | -3  | 7   | 0.16  | 1.69 |
| 13 | -2  | 1   | 3.98  | 1.41 |
| 2  | -14 | 4   | 1.87  | 1.65 |
| 8  | -2  | 11  | 1.20  | 1.69 |
| 10 | -6  | 7   | -0.76 | 1.78 |
| 11 | -6  | 5   | 2.47  | 1.19 |
| 13 | 0   | 2   | 0.61  | 1.79 |
| 6  | -4  | 12  | 1.99  | 1.50 |
| 5  | -2  | 13  | -0.44 | 1.66 |
| 10 | 1   | 9   | -1.64 | 1.77 |
| 11 | 8   | -2  | 0.01  | 1.65 |
| 10 | -1  | 9   | 1.80  | 1.37 |
| 11 | -8  | -2  | -3.86 | 2.04 |
| 3  | 10  | 10  | -0.93 | 1.63 |
| 13 | 2   | -2  | -4.50 | 1.92 |
| 5  | -13 | 4   | 0.54  | 2.01 |
| 2  | -3  | -14 | -4.87 | 1.72 |
| 12 | 6   | 1   | 2.14  | 1.68 |
| 13 | -2  | -2  | -0.89 | 1.76 |
| 6  | 8   | 10  | 1.98  | 1.16 |
| 12 | -6  | 1   | 0.47  | 1.73 |
| 2  | 3   | -14 | -0.94 | 1.69 |
| 5  | -8  | -11 | -2.10 | 2.46 |
| 6  | -1  | -13 | -1.77 | 2.25 |
| 12 | -4  | -5  | -0.73 | 2.15 |

|    |     |     |       |      |
|----|-----|-----|-------|------|
| 6  | 1   | -13 | 2.09  | 2.00 |
| 6  | 13  | 2   | 2.47  | 1.93 |
| 12 | 4   | -5  | 4.61  | 1.32 |
| 2  | -8  | -12 | 0.34  | 1.80 |
| 3  | -2  | -14 | 0.76  | 1.55 |
| 3  | -10 | 10  | -2.38 | 1.95 |
| 13 | 0   | -3  | 1.51  | 1.41 |
| 6  | -8  | 10  | 1.36  | 1.34 |
| 3  | 2   | -14 | 1.29  | 1.72 |
| 3  | 13  | 6   | -3.33 | 1.97 |
| 5  | 8   | -11 | 1.95  | 1.97 |
| 6  | -13 | 2   | -1.94 | 2.00 |
| 2  | 8   | -12 | -1.09 | 1.90 |
| 12 | 5   | -4  | 0.62  | 1.69 |
| 12 | 6   | -2  | -1.97 | 2.04 |
| 12 | -5  | -4  | 0.91  | 1.52 |
| 3  | 11  | 9   | 0.17  | 1.60 |
| 13 | 1   | 2   | 0.77  | 1.81 |
| 10 | 8   | 5   | 2.15  | 1.47 |
| 12 | -6  | -2  | 0.16  | 1.76 |
| 13 | -1  | 2   | 1.82  | 1.33 |
| 4  | -14 | -2  | 0.19  | 2.07 |
| 7  | 0   | 12  | 0.16  | 1.43 |
| 4  | 14  | -2  | 2.38  | 1.24 |
| 3  | -13 | 6   | -2.10 | 1.97 |
| 7  | 5   | 11  | 1.67  | 1.56 |
| 4  | -5  | -13 | 0.97  | 1.71 |
| 7  | -6  | -11 | -1.92 | 2.05 |
| 10 | -8  | 5   | 1.26  | 1.68 |
| 11 | 5   | 6   | -0.75 | 1.74 |
| 4  | 5   | -13 | 2.44  | 1.84 |
| 7  | 6   | -11 | -1.07 | 1.87 |
| 3  | -11 | 9   | -0.34 | 1.96 |
| 5  | 10  | 9   | 0.64  | 1.82 |
| 8  | 7   | 9   | 0.16  | 1.58 |
| 11 | -5  | 6   | -0.29 | 1.74 |
| 7  | -5  | 11  | 0.47  | 1.58 |
| 13 | 1   | -3  | 5.45  | 1.28 |
| 13 | -1  | -3  | 2.13  | 1.86 |
| 8  | -7  | 9   | 1.41  | 1.35 |
| 5  | -10 | 9   | -1.99 | 2.20 |
| 7  | -12 | -4  | 1.42  | 2.23 |
| 7  | 12  | -4  | 1.62  | 2.02 |
| 8  | 11  | 4   | -0.16 | 1.84 |
| 0  | -13 | -7  | -3.00 | 1.99 |
| 0  | 13  | 7   | -0.53 | 2.01 |
| 10 | -9  | -4  | 2.37  | 1.80 |
| 10 | 9   | -4  | 0.97  | 1.58 |
| 12 | 3   | 5   | -0.76 | 1.94 |
| 4  | 14  | 2   | -1.76 | 1.89 |
| 7  | 1   | 12  | 2.11  | 1.54 |
| 8  | -11 | 4   | 0.33  | 1.93 |
| 10 | -4  | -9  | 2.42  | 1.80 |
| 6  | 11  | 7   | -0.80 | 1.85 |
| 7  | -1  | 12  | 0.75  | 1.03 |
| 10 | 4   | -9  | 5.23  | 1.30 |
| 0  | 13  | -7  | 1.19  | 1.68 |
| 12 | -3  | 5   | 0.30  | 1.75 |

|    |     |     |       |      |
|----|-----|-----|-------|------|
| 0  | -13 | 7   | 0.51  | 1.80 |
| 4  | -14 | 2   | 0.18  | 1.67 |
| 3  | -12 | -8  | 4.12  | 1.32 |
| 7  | 7   | 10  | 0.15  | 1.45 |
| 11 | 7   | 4   | 1.38  | 1.43 |
| 6  | -11 | 7   | -0.68 | 1.88 |
| 9  | 10  | 4   | -1.58 | 1.75 |
| 5  | -4  | -13 | 1.64  | 1.92 |
| 3  | 12  | -8  | -0.67 | 1.94 |
| 2  | 6   | 13  | -1.20 | 1.75 |
| 1  | -13 | -7  | -0.35 | 1.99 |
| 5  | 4   | -13 | 0.00  | 1.95 |
| 3  | 0   | 14  | 0.60  | 1.75 |
| 11 | -7  | 4   | -0.94 | 1.67 |
| 9  | -10 | 4   | -0.97 | 1.77 |
| 7  | -7  | 10  | -0.94 | 1.84 |
| 5  | 9   | 10  | -2.47 | 1.90 |
| 10 | -7  | -7  | 0.94  | 1.80 |
| 11 | 6   | -6  | -0.16 | 1.82 |
| 11 | -6  | -6  | 1.61  | 1.13 |
| 10 | 7   | -7  | -0.96 | 1.83 |
| 13 | 3   | 0   | -0.91 | 2.01 |
| 2  | -6  | 13  | 0.95  | 1.78 |
| 1  | 13  | -7  | 2.18  | 1.17 |
| 13 | -3  | 0   | 2.57  | 1.77 |
| 13 | -3  | -1  | 1.21  | 1.40 |
| 13 | 3   | -1  | 0.30  | 1.76 |
| 10 | 2   | 9   | -1.98 | 1.86 |
| 8  | 10  | 6   | 0.24  | 1.13 |
| 5  | -9  | 10  | 0.82  | 1.85 |
| 10 | -2  | 9   | 1.81  | 1.53 |
| 11 | 8   | 2   | 1.01  | 1.19 |
| 9  | 8   | 7   | 0.00  | 1.13 |
| 11 | -8  | 2   | -0.47 | 1.78 |
| 8  | -10 | 6   | -0.66 | 1.52 |
| 6  | -2  | -13 | 2.93  | 1.39 |
| 6  | 2   | -13 | 2.15  | 2.24 |
| 0  | -14 | -5  | -1.37 | 2.04 |
| 0  | 14  | 5   | -0.34 | 1.86 |
| 3  | 9   | 11  | 0.31  | 1.63 |
| 1  | 13  | 7   | -1.62 | 1.99 |
| 3  | 1   | 14  | 0.38  | 1.06 |
| 9  | -8  | 7   | -1.10 | 1.53 |
| 3  | -1  | 14  | -0.15 | 1.65 |
| 11 | 3   | -8  | -1.83 | 2.11 |
| 11 | -3  | -8  | 6.70  | 1.37 |
| 6  | -13 | -3  | 1.09  | 1.94 |
| 6  | 13  | -3  | -1.95 | 1.90 |
| 0  | 14  | -5  | 2.50  | 1.89 |
| 0  | -14 | 5   | -1.34 | 1.77 |
| 9  | 0   | -11 | 2.19  | 1.41 |
| 13 | 2   | 2   | 3.06  | 1.41 |
| 1  | -13 | 7   | -1.91 | 1.91 |
| 4  | -10 | -10 | -0.18 | 1.79 |
| 5  | 11  | 8   | 0.48  | 1.22 |
| 13 | -2  | 2   | 3.03  | 2.05 |
| 2  | 8   | 12  | 1.08  | 1.65 |
| 3  | -9  | 11  | 1.01  | 1.54 |

|    |     |     |       |      |
|----|-----|-----|-------|------|
| 9  | 11  | 0   | 0.83  | 1.51 |
| 9  | -11 | 0   | -0.17 | 1.77 |
| 0  | 4   | 14  | 0.75  | 1.55 |
| 9  | 3   | 10  | 0.00  | 1.76 |
| 3  | -6  | -13 | 1.11  | 1.66 |
| 0  | -4  | -14 | -2.55 | 1.56 |
| 12 | -3  | -6  | -2.28 | 1.99 |
| 9  | -3  | 10  | 1.22  | 1.41 |
| 2  | 3   | 14  | -0.15 | 1.60 |
| 4  | 10  | -10 | 2.41  | 1.65 |
| 2  | -8  | 12  | 1.00  | 1.52 |
| 12 | 3   | -6  | 1.67  | 1.27 |
| 12 | 6   | 2   | -0.77 | 1.57 |
| 5  | -11 | 8   | -1.73 | 1.71 |
| 2  | -3  | 14  | 0.47  | 1.35 |
| 0  | -4  | 14  | 1.41  | 1.51 |
| 3  | 6   | -13 | -1.12 | 1.82 |
| 1  | -4  | -14 | 1.95  | 1.56 |
| 9  | 11  | -1  | 0.84  | 1.73 |
| 12 | -6  | 2   | 1.86  | 1.78 |
| 1  | -14 | -5  | 2.03  | 1.38 |
| 4  | 0   | -14 | 0.64  | 1.33 |
| 0  | 4   | -14 | 2.19  | 1.50 |
| 3  | -14 | -4  | -1.35 | 1.92 |
| 13 | -2  | -3  | 1.07  | 1.76 |
| 13 | 2   | -3  | -1.37 | 1.74 |
| 11 | -8  | -3  | 1.58  | 1.76 |
| 9  | -11 | -1  | -0.67 | 1.65 |
| 11 | 8   | -3  | 1.42  | 1.58 |
| 1  | 14  | -5  | -2.64 | 1.96 |
| 11 | -5  | -7  | 1.99  | 1.76 |
| 11 | 5   | -7  | 0.62  | 1.31 |
| 3  | 14  | -4  | -1.00 | 1.78 |
| 1  | 4   | -14 | -0.96 | 1.75 |
| 13 | 3   | 1   | 1.69  | 1.67 |
| 9  | 7   | 8   | 2.15  | 1.17 |
| 10 | -8  | -6  | 0.32  | 1.66 |
| 10 | 8   | -6  | -0.97 | 1.95 |
| 7  | 11  | 6   | -0.65 | 1.83 |
| 9  | 1   | -11 | 1.67  | 1.89 |
| 5  | 3   | 13  | 2.05  | 1.01 |
| 7  | -9  | -9  | 2.30  | 2.00 |
| 13 | -3  | 1   | 1.22  | 1.88 |
| 8  | 3   | 11  | -0.31 | 1.89 |
| 10 | -6  | -8  | 2.18  | 1.21 |
| 9  | -1  | -11 | -1.21 | 1.91 |
| 11 | 7   | -5  | -2.68 | 2.05 |
| 11 | -7  | -5  | 2.74  | 1.30 |
| 7  | -4  | -12 | 1.08  | 1.86 |
| 10 | 6   | -8  | 0.32  | 1.67 |
| 5  | 6   | 12  | 0.30  | 1.26 |
| 5  | -3  | 13  | 1.38  | 1.07 |
| 7  | 2   | 12  | 0.61  | 1.30 |
| 7  | 9   | -9  | 2.37  | 1.90 |
| 8  | -3  | 11  | 2.29  | 1.57 |
| 7  | 4   | -12 | 0.90  | 1.86 |
| 9  | -7  | 8   | 0.00  | 1.59 |
| 7  | -11 | 6   | -1.36 | 1.85 |

|    |     |     |       |      |
|----|-----|-----|-------|------|
| 7  | -2  | 12  | -1.52 | 1.68 |
| 13 | 3   | -2  | 2.99  | 1.31 |
| 1  | 14  | 5   | 0.53  | 2.08 |
| 4  | -11 | -9  | 0.00  | 2.07 |
| 13 | -3  | -2  | 0.61  | 1.81 |
| 12 | -6  | -3  | 0.93  | 1.74 |
| 5  | -6  | 12  | 2.36  | 1.66 |
| 12 | 6   | -3  | 2.48  | 1.76 |
| 10 | 5   | 8   | -2.14 | 1.66 |
| 1  | -14 | 5   | 0.68  | 1.86 |
| 4  | -1  | -14 | 1.07  | 1.51 |
| 4  | 1   | -14 | 1.34  | 1.98 |
| 4  | 11  | -9  | -2.57 | 2.12 |
| 10 | -5  | 8   | -1.40 | 1.85 |
| 10 | 0   | -10 | 6.28  | 1.20 |
| 3  | -3  | -14 | 3.91  | 1.08 |
| 12 | 0   | 6   | 5.88  | 1.49 |
| 7  | 12  | 4   | 0.34  | 1.90 |
| 8  | 12  | 0   | -1.73 | 1.76 |
| 9  | 11  | 1   | 0.82  | 1.66 |
| 8  | -9  | -8  | 4.84  | 1.13 |
| 3  | 12  | 8   | -0.52 | 1.76 |
| 3  | 3   | -14 | 1.87  | 1.49 |
| 8  | -12 | 0   | -2.42 | 2.01 |
| 4  | 7   | 12  | -2.59 | 1.76 |
| 2  | -13 | -7  | -0.52 | 2.02 |
| 9  | 9   | 6   | 0.00  | 1.58 |
| 5  | -12 | -7  | 0.54  | 1.90 |
| 6  | -12 | -6  | -3.53 | 2.27 |
| 8  | 9   | -8  | 0.71  | 1.94 |
| 4  | -14 | -3  | -1.92 | 2.05 |
| 3  | -8  | -12 | -1.78 | 1.97 |
| 9  | -11 | 1   | 0.67  | 1.46 |
| 7  | -12 | 4   | 2.70  | 1.32 |
| 6  | 12  | -6  | -1.07 | 2.04 |
| 4  | 14  | -3  | -1.88 | 1.92 |
| 5  | 12  | -7  | 0.00  | 1.90 |
| 8  | -8  | -9  | 0.49  | 1.86 |
| 3  | -12 | 8   | -2.53 | 2.01 |
| 4  | -7  | 12  | 0.81  | 1.57 |
| 13 | 0   | 3   | 7.05  | 1.52 |
| 8  | 12  | -1  | -0.18 | 1.97 |
| 3  | 14  | 4   | -1.61 | 1.78 |
| 9  | -9  | 6   | 1.77  | 1.30 |
| 2  | 13  | -7  | 2.42  | 1.17 |
| 6  | 13  | 3   | 2.13  | 2.13 |
| 8  | -12 | -1  | -1.04 | 1.81 |
| 8  | 8   | -9  | -0.89 | 1.85 |
| 0  | 15  | 0   | -1.15 | 1.61 |
| 5  | -13 | -5  | 2.87  | 1.95 |
| 9  | -10 | -5  | -1.15 | 1.93 |
| 0  | -15 | 0   | -0.49 | 1.37 |
| 3  | 8   | -12 | 1.46  | 1.50 |
| 8  | -11 | -5  | -1.55 | 1.91 |
| 8  | 11  | -5  | 1.07  | 1.24 |
| 5  | 13  | -5  | 1.04  | 1.99 |
| 9  | 10  | -5  | 0.69  | 1.88 |
| 6  | -13 | 3   | 1.98  | 1.81 |



|    |     |     |       |      |
|----|-----|-----|-------|------|
| 3  | -14 | 4   | -0.18 | 1.48 |
| 7  | -10 | -8  | 2.89  | 1.97 |
| 10 | 1   | -10 | 0.31  | 1.99 |
| 10 | -1  | -10 | 1.98  | 1.87 |
| 1  | 4   | 14  | -0.91 | 1.74 |
| 3  | 2   | 14  | -0.61 | 1.77 |
| 4  | -13 | -6  | -2.09 | 1.91 |
| 7  | 10  | -8  | 2.19  | 1.79 |
| 12 | 1   | 6   | 1.23  | 1.66 |
| 11 | 4   | 7   | 0.00  | 1.77 |
| 12 | -1  | 6   | 1.53  | 2.00 |
| 1  | -4  | 14  | 2.85  | 1.13 |
| 3  | -2  | 14  | 3.53  | 1.12 |
| 4  | 13  | -6  | 0.85  | 1.66 |
| 11 | -4  | 7   | 1.15  | 1.21 |
| 4  | -9  | -11 | -1.53 | 2.32 |
| 8  | 0   | -12 | 1.38  | 1.20 |
| 10 | 10  | 0   | 2.68  | 1.27 |
| 13 | 0   | -4  | 2.31  | 1.66 |
| 9  | 11  | -2  | 2.23  | 1.58 |
| 9  | -11 | -2  | -0.17 | 1.58 |
| 13 | 1   | 3   | 1.08  | 1.94 |
| 10 | -10 | 0   | -0.49 | 2.02 |
| 4  | 9   | -11 | -0.71 | 1.75 |
| 13 | -1  | 3   | -0.15 | 1.83 |
| 0  | -15 | -1  | -2.33 | 1.76 |
| 0  | 15  | -1  | 0.83  | 1.39 |
| 8  | 12  | 1   | -1.21 | 1.88 |
| 0  | -15 | 1   | -2.32 | 1.70 |
| 2  | -4  | -14 | 0.15  | 1.58 |
| 0  | 15  | 1   | 1.66  | 1.56 |
| 9  | -5  | -10 | 0.31  | 1.84 |
| 9  | 5   | -10 | 1.30  | 1.84 |
| 10 | 10  | -1  | 0.00  | 1.75 |
| 10 | -10 | -1  | 2.70  | 1.23 |
| 1  | 15  | 0   | -0.17 | 1.95 |
| 7  | -8  | -10 | -0.70 | 2.08 |
| 8  | -12 | 1   | -2.08 | 1.95 |
| 2  | 4   | -14 | -3.68 | 1.85 |
| 11 | 0   | 8   | -3.22 | 2.14 |
| 1  | -15 | 0   | -1.99 | 1.82 |
| 4  | 14  | 3   | 0.90  | 1.92 |
| 7  | 8   | -10 | 2.77  | 1.24 |
| 0  | -11 | -10 | -2.47 | 2.01 |
| 12 | 5   | 4   | -2.32 | 1.68 |
| 10 | 9   | 4   | -0.32 | 1.96 |
| 0  | 11  | 10  | -1.23 | 1.92 |
| 9  | -2  | -11 | -0.15 | 2.21 |
| 2  | -14 | -5  | -1.88 | 1.88 |
| 2  | 13  | 7   | 1.63  | 1.63 |
| 4  | -14 | 3   | 0.89  | 1.85 |
| 12 | -5  | 4   | 0.93  | 1.70 |
| 9  | 2   | -11 | 0.00  | 2.02 |
| 6  | 7   | 11  | 0.31  | 1.62 |
| 10 | 3   | 9   | -0.47 | 1.72 |
| 13 | -1  | -4  | 1.08  | 1.57 |
| 13 | 1   | -4  | 0.77  | 1.81 |
| 8  | -1  | -12 | 0.15  | 2.18 |

|    |     |     |       |      |
|----|-----|-----|-------|------|
| 10 | -9  | 4   | 0.32  | 1.82 |
| 8  | 1   | -12 | 1.72  | 1.98 |
| 2  | 14  | -5  | -0.17 | 1.62 |
| 0  | 11  | -10 | -1.28 | 1.94 |
| 0  | -11 | 10  | 1.82  | 1.59 |
| 12 | 0   | -7  | 0.92  | 1.80 |
| 10 | -3  | 9   | -0.92 | 1.64 |
| 6  | -10 | -9  | -2.45 | 1.95 |
| 2  | -13 | 7   | -0.72 | 1.77 |
| 8  | -5  | -11 | 2.66  | 1.87 |
| 1  | -11 | -10 | -0.18 | 1.94 |
| 5  | 8   | 11  | 0.93  | 1.78 |
| 6  | -7  | 11  | 1.76  | 1.15 |
| 11 | 1   | 8   | -2.31 | 2.02 |
| 6  | 10  | -9  | 0.54  | 1.74 |
| 4  | -2  | -14 | -1.08 | 1.64 |
| 8  | 5   | -11 | 3.84  | 1.26 |
| 11 | -1  | 8   | -0.92 | 1.84 |
| 1  | 15  | -1  | 0.67  | 1.76 |
| 6  | -3  | -13 | 1.91  | 1.79 |
| 4  | 2   | -14 | -0.53 | 1.75 |
| 1  | -15 | -1  | -2.00 | 1.87 |
| 6  | 3   | -13 | -3.76 | 2.26 |
| 4  | 5   | 13  | -0.31 | 1.71 |
| 1  | 15  | 1   | 1.86  | 1.42 |
| 1  | -15 | 1   | 2.60  | 1.23 |
| 0  | 7   | 13  | 1.55  | 1.77 |
| 5  | 14  | 0   | 1.44  | 1.88 |
| 0  | -7  | -13 | 1.40  | 1.50 |
| 1  | 11  | -10 | 0.18  | 1.78 |
| 5  | -14 | 0   | 1.44  | 1.79 |
| 10 | 10  | 1   | -0.65 | 1.88 |
| 6  | 5   | 12  | 1.08  | 1.69 |
| 5  | -8  | 11  | 1.31  | 1.72 |
| 6  | -9  | -10 | 2.28  | 1.42 |
| 8  | 12  | -2  | 2.14  | 1.45 |
| 4  | -5  | 13  | -0.16 | 1.65 |
| 0  | 10  | 11  | 0.00  | 1.81 |
| 0  | -10 | -11 | 0.34  | 2.04 |
| 8  | -12 | -2  | -1.40 | 1.86 |
| 10 | -10 | 1   | -0.16 | 1.55 |
| 1  | -7  | -13 | 1.57  | 1.15 |
| 0  | 7   | -13 | 1.21  | 1.85 |
| 13 | 3   | 2   | -1.09 | 2.01 |
| 0  | -7  | 13  | 0.00  | 1.74 |
| 6  | 9   | -10 | 0.73  | 1.87 |
| 8  | 6   | 10  | -1.70 | 1.66 |
| 6  | -5  | 12  | 0.48  | 1.76 |
| 13 | -3  | 2   | 1.23  | 1.70 |
| 12 | 4   | 5   | 4.59  | 1.42 |
| 12 | -4  | 5   | 5.50  | 1.37 |
| 12 | -1  | -7  | 2.31  | 1.71 |
| 12 | 1   | -7  | -1.24 | 1.84 |
| 0  | -10 | 11  | 1.29  | 1.87 |
| 11 | 8   | 3   | -1.89 | 1.64 |
| 2  | 14  | 5   | -5.91 | 2.08 |
| 1  | 7   | -13 | -2.50 | 1.79 |
| 0  | 10  | -11 | -1.29 | 1.96 |

|    |     |     |       |      |
|----|-----|-----|-------|------|
| 1  | -10 | -11 | 2.45  | 1.68 |
| 8  | -6  | 10  | -0.64 | 1.53 |
| 5  | 14  | -1  | 2.58  | 1.23 |
| 5  | -14 | -1  | -0.54 | 2.10 |
| 6  | -6  | -12 | 2.09  | 2.13 |
| 8  | -10 | -7  | 1.90  | 2.02 |
| 5  | -7  | -12 | -0.82 | 2.36 |
| 9  | -8  | -8  | -0.16 | 1.92 |
| 12 | -5  | -5  | -3.26 | 1.99 |
| 11 | -8  | 3   | 0.48  | 1.82 |
| 12 | 5   | -5  | -0.47 | 2.08 |
| 10 | -2  | -10 | 2.00  | 2.17 |
| 10 | 2   | -10 | 2.48  | 1.39 |
| 12 | 2   | 6   | 5.00  | 1.28 |
| 9  | 11  | 2   | 1.00  | 1.95 |
| 13 | 3   | -3  | 0.47  | 1.59 |
| 2  | -14 | 5   | 1.58  | 1.74 |
| 13 | -3  | -3  | -0.46 | 1.94 |
| 8  | 10  | -7  | 0.63  | 1.42 |
| 6  | 6   | -12 | -1.32 | 1.90 |
| 1  | 11  | 10  | -2.42 | 1.82 |
| 9  | 8   | -8  | 0.34  | 1.64 |
| 5  | 7   | -12 | -0.55 | 1.83 |
| 12 | -2  | 6   | 2.47  | 1.29 |
| 1  | 10  | -11 | 1.48  | 1.71 |
| 4  | 10  | 10  | 0.15  | 1.58 |
| 5  | 13  | 5   | 1.69  | 1.37 |
| 3  | 6   | 13  | 0.45  | 1.66 |
| 10 | 10  | -2  | 1.98  | 1.78 |
| 13 | 4   | 0   | 1.23  | 1.89 |
| 9  | -11 | 2   | -2.72 | 1.93 |
| 10 | -10 | -2  | -0.67 | 1.78 |
| 13 | -4  | 0   | 0.30  | 1.87 |
| 4  | 13  | 6   | -0.91 | 1.60 |
| 7  | 3   | 12  | -1.25 | 1.77 |
| 13 | 4   | -1  | 1.86  | 1.75 |
| 5  | 14  | 1   | -1.46 | 1.87 |
| 13 | -4  | -1  | 0.45  | 1.67 |
| 3  | -6  | 13  | 0.47  | 1.88 |
| 1  | -11 | 10  | -0.93 | 1.81 |
| 5  | -13 | 5   | 2.55  | 1.76 |
| 4  | -10 | 10  | 1.03  | 1.75 |
| 13 | 2   | 3   | 2.49  | 1.51 |
| 7  | -3  | 12  | 1.94  | 1.08 |
| 13 | -2  | 3   | 2.00  | 1.98 |
| 5  | -14 | 1   | 1.80  | 1.76 |
| 4  | -13 | 6   | -0.19 | 1.73 |
| 4  | 11  | 9   | -1.33 | 1.66 |
| 9  | 6   | 9   | 2.02  | 1.72 |
| 0  | -15 | -2  | -1.02 | 1.65 |
| 12 | 6   | 3   | 4.16  | 1.02 |
| 0  | 15  | 2   | 1.84  | 1.84 |
| 4  | -12 | -8  | 1.78  | 2.00 |
| 0  | 15  | -2  | 0.32  | 1.66 |
| 0  | -15 | 2   | 0.99  | 1.74 |
| 12 | -6  | 3   | 2.69  | 1.08 |
| 0  | -12 | -9  | 3.11  | 2.15 |
| 0  | 12  | 9   | 5.04  | 1.26 |

|    |     |     |       |      |
|----|-----|-----|-------|------|
| 8  | -7  | -10 | 0.96  | 1.83 |
| 6  | 0   | 13  | 0.14  | 1.56 |
| 6  | -13 | -4  | -4.29 | 1.99 |
| 9  | -6  | 9   | 3.82  | 1.25 |
| 7  | -12 | -5  | -0.57 | 2.15 |
| 5  | 12  | 7   | 1.87  | 1.66 |
| 11 | -4  | -8  | -4.21 | 2.03 |
| 4  | -11 | 9   | 1.77  | 1.83 |
| 11 | 4   | -8  | 2.66  | 1.84 |
| 8  | 7   | -10 | 1.42  | 1.98 |
| 6  | 13  | -4  | 0.35  | 1.84 |
| 10 | -9  | -5  | 1.78  | 1.78 |
| 4  | 12  | -8  | -3.64 | 2.14 |
| 7  | 12  | -5  | -1.66 | 1.99 |
| 1  | 7   | 13  | 2.17  | 1.63 |
| 1  | 10  | 11  | 2.74  | 1.11 |
| 10 | 9   | -5  | -3.69 | 1.89 |
| 0  | 12  | -9  | 1.62  | 1.23 |
| 13 | 2   | -4  | 0.77  | 1.52 |
| 0  | -12 | 9   | 1.80  | 1.26 |
| 13 | -2  | -4  | -2.04 | 2.12 |
| 8  | -2  | -12 | -0.94 | 1.89 |
| 8  | 12  | 2   | -0.01 | 1.74 |
| 6  | 12  | 6   | -1.20 | 1.85 |
| 3  | 8   | 12  | -0.79 | 1.55 |
| 8  | 2   | -12 | 1.92  | 1.28 |
| 5  | -12 | 7   | -3.44 | 2.02 |
| 9  | 4   | 10  | 2.48  | 1.82 |
| 1  | -7  | 13  | -0.18 | 1.48 |
| 10 | -5  | -9  | -1.11 | 1.79 |
| 1  | -12 | -9  | 0.73  | 1.74 |
| 8  | -12 | 2   | -1.24 | 1.81 |
| 12 | -4  | -6  | -1.10 | 1.86 |
| 2  | 15  | 0   | 1.02  | 1.73 |
| 11 | -8  | -4  | -1.79 | 1.98 |
| 2  | 4   | 14  | -1.86 | 1.73 |
| 10 | 5   | -9  | 2.56  | 1.74 |
| 11 | 8   | -4  | -1.15 | 1.82 |
| 6  | -12 | 6   | -1.80 | 2.02 |
| 2  | -15 | 0   | -2.57 | 1.98 |
| 9  | -9  | -7  | 0.48  | 1.74 |
| 12 | 4   | -6  | 2.33  | 1.65 |
| 12 | 7   | 0   | 1.26  | 1.79 |
| 1  | -10 | 11  | 0.17  | 1.63 |
| 2  | -11 | -10 | -2.27 | 2.06 |
| 11 | 2   | 8   | 1.24  | 1.65 |
| 9  | -4  | 10  | 2.66  | 1.88 |
| 5  | -5  | -13 | -3.83 | 2.40 |
| 2  | -4  | 14  | -1.94 | 1.76 |
| 12 | -7  | 0   | 1.43  | 1.98 |
| 3  | -8  | 12  | 0.33  | 1.56 |
| 11 | -2  | 8   | -0.01 | 1.90 |
| 9  | 9   | -7  | -2.81 | 1.93 |
| 12 | 7   | -1  | -2.55 | 1.92 |
| 1  | -15 | -2  | -0.01 | 1.60 |
| 3  | 3   | 14  | -3.56 | 1.61 |
| 6  | -11 | -8  | -0.77 | 2.10 |
| 1  | 12  | -9  | 1.05  | 1.84 |

|    |     |     |       |      |
|----|-----|-----|-------|------|
| 1  | 15  | -2  | -1.18 | 1.87 |
| 12 | -7  | -1  | -0.81 | 1.89 |
| 9  | -11 | -3  | -3.78 | 2.11 |
| 3  | -13 | -7  | -3.70 | 2.17 |
| 6  | 1   | 13  | -1.72 | 1.75 |
| 9  | 11  | -3  | 0.51  | 1.85 |
| 2  | 11  | -10 | 0.87  | 1.88 |
| 5  | 5   | -13 | 1.92  | 2.15 |
| 6  | -1  | 13  | 1.53  | 1.84 |
| 1  | 15  | 2   | 2.22  | 1.74 |
| 5  | 4   | 13  | 0.92  | 1.61 |
| 6  | 11  | -8  | -1.81 | 2.08 |
| 7  | 13  | 0   | 0.72  | 1.83 |
| 3  | -3  | 14  | -1.75 | 1.56 |
| 2  | -7  | -13 | 0.96  | 1.63 |
| 13 | 4   | 1   | 1.40  | 1.90 |
| 8  | 4   | 11  | 2.02  | 1.26 |
| 8  | 11  | 5   | 1.48  | 1.70 |
| 12 | -6  | -4  | -0.64 | 1.83 |
| 13 | -4  | 1   | 0.92  | 1.75 |
| 9  | -7  | -9  | -1.62 | 1.90 |
| 12 | 6   | -4  | -1.44 | 1.76 |
| 3  | 13  | -7  | -4.44 | 2.07 |
| 11 | 0   | -9  | -0.32 | 1.81 |
| 9  | 7   | -9  | -0.87 | 2.06 |
| 1  | -15 | 2   | -2.73 | 1.73 |
| 7  | -13 | 0   | -1.30 | 2.05 |
| 8  | -4  | 11  | 2.83  | 1.22 |
| 7  | -11 | -7  | 0.92  | 1.86 |
| 5  | -4  | 13  | 1.42  | 1.54 |
| 11 | 6   | 6   | 3.22  | 1.28 |
| 2  | 7   | -13 | -0.58 | 1.82 |
| 4  | -6  | -13 | 0.17  | 1.67 |
| 7  | 6   | 11  | 1.24  | 1.14 |
| 12 | -2  | -7  | 2.02  | 2.03 |
| 2  | -15 | -1  | 1.18  | 1.78 |
| 5  | 14  | -2  | -3.04 | 1.96 |
| 12 | 2   | -7  | 1.86  | 1.87 |
| 2  | 15  | -1  | 0.84  | 1.66 |
| 13 | 4   | -2  | -0.01 | 1.63 |
| 8  | -11 | 5   | 1.45  | 1.23 |
| 5  | -14 | -2  | -0.56 | 2.02 |
| 7  | 11  | -7  | -0.20 | 1.91 |
| 13 | -4  | -2  | -2.19 | 1.90 |
| 2  | -10 | -11 | 1.85  | 1.91 |
| 11 | -6  | 6   | -1.62 | 2.02 |
| 4  | 6   | -13 | -0.97 | 1.89 |
| 7  | 13  | -1  | -0.56 | 1.94 |
| 7  | -6  | 11  | -2.10 | 1.67 |
| 2  | 15  | 1   | -3.45 | 1.72 |
| 4  | 0   | 14  | -0.63 | 1.87 |
| 1  | 12  | 9   | -5.08 | 2.14 |
| 2  | -15 | 1   | 2.22  | 1.89 |
| 7  | -13 | -1  | -1.67 | 2.23 |
| 3  | -4  | -14 | 2.62  | 1.13 |
| 10 | 10  | 2   | 0.32  | 1.86 |
| 9  | 10  | 5   | 0.56  | 1.18 |
| 11 | 7   | 5   | 3.40  | 1.12 |

|    |     |     |       |      |
|----|-----|-----|-------|------|
| 2  | 10  | -11 | -0.74 | 2.01 |
| 10 | 7   | 7   | 1.41  | 1.62 |
| 3  | 4   | -14 | 1.07  | 1.60 |
| 9  | -3  | -11 | -1.59 | 2.01 |
| 10 | -10 | 2   | -1.51 | 1.85 |
| 9  | 3   | -11 | -0.66 | 1.86 |
| 1  | -12 | 9   | 0.36  | 1.58 |
| 11 | -1  | -9  | 2.16  | 1.42 |
| 11 | 1   | -9  | 1.31  | 1.39 |
| 9  | -10 | 5   | 0.33  | 1.71 |
| 11 | -7  | 5   | 0.95  | 1.37 |
| 10 | -7  | 7   | -0.17 | 1.85 |
| 4  | -14 | -4  | -3.21 | 2.18 |
| 4  | 14  | -4  | -1.23 | 2.03 |
| 0  | 5   | 14  | 1.69  | 1.60 |
| 4  | 9   | 11  | -0.17 | 1.46 |
| 0  | -5  | -14 | 0.30  | 1.53 |
| 12 | 7   | 1   | -0.17 | 1.70 |
| 10 | 8   | 6   | 0.14  | 2.00 |
| 12 | -7  | 1   | -0.17 | 1.62 |
| 4  | -3  | -14 | -1.71 | 1.74 |
| 7  | 13  | 1   | 1.63  | 1.69 |
| 1  | -5  | -14 | 2.24  | 1.15 |
| 0  | -5  | 14  | 0.32  | 1.63 |
| 4  | 1   | 14  | -1.88 | 1.79 |
| 0  | 5   | -14 | 2.12  | 1.57 |
| 7  | -13 | 1   | -0.20 | 1.90 |
| 8  | 12  | -3  | -0.38 | 1.99 |
| 6  | -8  | -11 | 2.14  | 2.03 |
| 5  | 14  | 2   | -5.00 | 2.05 |
| 4  | 3   | -14 | -0.01 | 1.88 |
| 4  | -1  | 14  | 0.30  | 1.50 |
| 10 | -8  | 6   | 2.18  | 1.17 |
| 8  | -12 | -3  | -0.91 | 2.12 |
| 4  | -9  | 11  | -1.90 | 1.84 |
| 1  | 5   | -14 | -0.69 | 1.73 |
| 6  | 8   | -11 | -0.20 | 1.92 |
| 7  | 9   | 9   | -2.57 | 1.63 |
| 3  | -14 | -5  | -1.58 | 2.02 |
| 5  | -14 | 2   | -0.20 | 2.05 |
| 12 | 7   | -2  | 1.75  | 1.75 |
| 7  | -5  | -12 | 2.63  | 1.97 |
| 4  | -8  | -12 | -0.60 | 2.24 |
| 12 | -7  | -2  | 3.13  | 1.22 |
| 6  | 13  | 4   | 1.97  | 1.86 |
| 3  | 14  | -5  | 2.38  | 1.74 |
| 7  | -7  | -11 | 0.16  | 2.08 |
| 7  | 5   | -12 | -5.12 | 2.47 |
| 0  | -9  | -12 | -1.83 | 1.86 |
| 2  | 11  | 10  | 1.36  | 1.59 |
| 0  | 9   | 12  | -1.83 | 1.86 |
| 7  | -9  | 9   | -0.18 | 1.83 |
| 4  | 8   | -12 | 1.84  | 1.54 |
| 6  | -13 | 4   | -3.14 | 1.92 |
| 7  | 10  | 8   | 0.64  | 1.47 |
| 7  | 7   | -11 | 1.12  | 2.13 |
| 10 | 10  | -3  | -0.52 | 1.93 |
| 2  | -12 | -9  | 1.29  | 1.43 |

|    |     |     |       |      |
|----|-----|-----|-------|------|
| 10 | -10 | -3  | -1.86 | 1.84 |
| 11 | 9   | 0   | -2.62 | 1.89 |
| 10 | -3  | -10 | 0.77  | 2.08 |
| 13 | 0   | 4   | 0.62  | 1.80 |
| 2  | -11 | 10  | -0.75 | 1.78 |
| 12 | 3   | 6   | -0.17 | 1.82 |
| 0  | 9   | -12 | -0.75 | 1.66 |
| 0  | -9  | 12  | 2.04  | 1.76 |
| 10 | 3   | -10 | -0.17 | 1.82 |
| 11 | -9  | 0   | 1.30  | 1.67 |
| 1  | -9  | -12 | 0.16  | 1.67 |
| 3  | 13  | 7   | -0.01 | 1.91 |
| 11 | 9   | -1  | 0.15  | 1.85 |
| 6  | 2   | 13  | 0.78  | 1.53 |
| 12 | -3  | 6   | -0.17 | 1.53 |
| 5  | -10 | -10 | 4.79  | 1.42 |
| 6  | -2  | 13  | 0.30  | 1.74 |
| 7  | -10 | 8   | -0.36 | 1.91 |
| 5  | 0   | -14 | -0.20 | 2.02 |
| 2  | 12  | -9  | -3.15 | 1.91 |
| 8  | 9   | 8   | 1.27  | 1.59 |
| 11 | -9  | -1  | 0.48  | 1.90 |
| 7  | 0   | -13 | -1.32 | 2.14 |
| 5  | 10  | -10 | 0.17  | 2.11 |
| 1  | 9   | -12 | 1.13  | 1.80 |
| 3  | -13 | 7   | -0.01 | 1.50 |
| 10 | 4   | 9   | 2.05  | 1.78 |
| 0  | 14  | 6   | 1.60  | 1.99 |
| 7  | -13 | -2  | 2.41  | 1.89 |
| 4  | 12  | 8   | 2.60  | 1.84 |
| 13 | 3   | 3   | 1.42  | 1.85 |
| 0  | -14 | -6  | 1.96  | 1.69 |
| 7  | 13  | -2  | -2.62 | 1.97 |
| 8  | -9  | 8   | 1.49  | 1.65 |
| 2  | -15 | -2  | 1.02  | 2.02 |
| 10 | -4  | 9   | 5.23  | 1.26 |
| 13 | -3  | 3   | 0.62  | 1.71 |
| 4  | 14  | 4   | -1.68 | 1.79 |
| 2  | 15  | -2  | 0.33  | 1.74 |
| 0  | -14 | 6   | 1.03  | 1.86 |
| 0  | 14  | -6  | 1.90  | 2.04 |
| 9  | 11  | 3   | -1.02 | 1.85 |
| 1  | 5   | 14  | 1.39  | 1.22 |
| 6  | -4  | -13 | 4.73  | 1.41 |
| 2  | 10  | 11  | 0.16  | 1.58 |
| 2  | 7   | 13  | -1.43 | 1.66 |
| 4  | -12 | 8   | -2.97 | 1.99 |
| 13 | -1  | 4   | 0.62  | 1.88 |
| 13 | 1   | 4   | -0.17 | 1.86 |
| 13 | 0   | -5  | -0.01 | 1.86 |
| 6  | 4   | -13 | 0.79  | 2.28 |
| 4  | -14 | 4   | -0.74 | 1.70 |
| 2  | 15  | 2   | 2.89  | 1.17 |
| 7  | 12  | 5   | -1.22 | 1.93 |
| 11 | 5   | 7   | 1.57  | 1.72 |
| 11 | -6  | -7  | 0.63  | 1.82 |
| 0  | -15 | -3  | -1.74 | 1.86 |
| 0  | 15  | 3   | -0.35 | 1.57 |

|    |     |     |       |      |
|----|-----|-----|-------|------|
| 11 | 7   | -6  | -0.99 | 1.75 |
| 1  | -5  | 14  | 1.47  | 1.73 |
| 11 | -7  | -6  | -2.29 | 2.02 |
| 9  | -11 | 3   | -0.18 | 1.73 |
| 5  | 1   | -14 | -3.37 | 2.28 |
| 11 | 6   | -7  | -0.98 | 1.68 |
| 5  | -1  | -14 | 2.35  | 1.72 |
| 6  | 10  | 9   | -2.13 | 1.95 |
| 2  | -15 | 2   | 0.60  | 1.17 |
| 0  | 15  | -3  | 0.84  | 1.66 |
| 0  | -15 | 3   | -1.03 | 1.62 |
| 5  | -11 | -9  | -2.46 | 2.11 |
| 13 | 4   | 2   | 6.02  | 1.37 |
| 7  | 1   | -13 | -2.57 | 1.99 |
| 3  | 14  | 5   | -0.01 | 1.88 |
| 2  | -10 | 11  | -5.48 | 2.00 |
| 2  | -7  | 13  | 1.17  | 1.72 |
| 11 | -5  | 7   | 0.15  | 1.63 |
| 7  | -1  | -13 | 2.52  | 2.00 |
| 11 | -2  | -9  | 0.30  | 1.90 |
| 13 | -4  | 2   | 4.81  | 1.33 |
| 8  | -3  | -12 | -0.17 | 1.90 |
| 11 | 2   | -9  | -4.74 | 2.08 |
| 13 | 3   | -4  | -1.28 | 2.01 |
| 7  | -12 | 5   | -0.91 | 2.21 |
| 1  | -14 | -6  | 0.88  | 1.32 |
| 13 | -3  | -4  | 3.92  | 1.34 |
| 8  | 3   | -12 | 2.35  | 1.91 |
| 5  | 11  | -9  | 2.22  | 1.24 |
| 2  | -5  | -14 | 1.48  | 1.22 |
| 6  | -10 | 9   | -1.23 | 1.85 |
| 11 | 9   | 1   | 0.81  | 1.69 |
| 3  | -14 | 5   | -0.37 | 1.64 |
| 1  | 14  | -6  | 0.16  | 1.79 |
| 10 | 6   | 8   | 4.52  | 1.33 |
| 8  | 8   | 9   | -0.33 | 1.65 |
| 11 | 3   | 8   | 1.11  | 1.62 |
| 1  | 9   | 12  | -1.32 | 1.83 |
| 11 | -9  | 1   | 1.47  | 1.73 |
| 4  | 2   | 14  | 0.46  | 1.71 |
| 11 | -3  | 8   | 0.31  | 1.66 |
| 2  | 5   | -14 | 2.57  | 1.11 |
| 13 | -4  | -3  | -0.17 | 1.85 |
| 13 | 4   | -3  | 1.43  | 1.54 |
| 10 | -6  | 8   | 3.73  | 1.33 |
| 4  | -2  | 14  | -0.64 | 1.42 |
| 13 | -1  | -5  | 2.84  | 1.98 |
| 13 | 1   | -5  | 2.37  | 1.76 |
| 8  | -8  | 9   | -1.83 | 1.72 |
| 1  | -9  | 12  | -0.19 | 1.66 |
| 1  | -15 | -3  | 1.36  | 1.85 |
| 1  | 14  | 6   | -2.03 | 2.11 |
| 3  | -11 | -10 | 1.88  | 2.16 |
| 8  | 12  | 3   | -0.01 | 1.86 |
| 1  | 15  | -3  | -0.18 | 1.65 |
| 7  | 4   | 12  | 1.41  | 1.76 |
| 2  | 12  | 9   | -4.86 | 2.22 |
| 7  | 13  | 2   | 3.18  | 1.22 |



|    |     |     |       |      |
|----|-----|-----|-------|------|
| 11 | 9   | -2  | -0.34 | 1.56 |
| 1  | -14 | 6   | 1.50  | 1.34 |
| 1  | 15  | 3   | -3.18 | 2.11 |
| 5  | -14 | -3  | 2.30  | 1.20 |
| 12 | -3  | -7  | 0.30  | 1.87 |
| 8  | -12 | 3   | 0.70  | 1.73 |
| 5  | 14  | -3  | 0.17  | 1.97 |
| 7  | -4  | 12  | 0.80  | 1.52 |
| 3  | -7  | -13 | 1.70  | 1.71 |
| 11 | -9  | -2  | -0.34 | 1.93 |
| 12 | 3   | -7  | 1.33  | 1.29 |
| 3  | 11  | -10 | 1.23  | 1.80 |
| 7  | -13 | 2   | 0.91  | 2.02 |
| 8  | -11 | -6  | 1.97  | 1.86 |
| 6  | 9   | 10  | 0.79  | 1.85 |
| 9  | -10 | -6  | -0.35 | 1.86 |
| 12 | 7   | 2   | 1.28  | 1.83 |
| 9  | 10  | -6  | -0.55 | 1.74 |
| 7  | 8   | 10  | -2.25 | 1.74 |
| 1  | -15 | 3   | -1.22 | 1.74 |
| 8  | 10  | 7   | -1.65 | 1.57 |
| 2  | -12 | 9   | 2.05  | 1.71 |
| 11 | 8   | 4   | -0.17 | 1.90 |
| 5  | -9  | -11 | -5.57 | 2.45 |
| 8  | 11  | -6  | -0.20 | 1.88 |
| 12 | -7  | 2   | 1.79  | 1.74 |
| 3  | 7   | -13 | 1.34  | 1.84 |
| 3  | 15  | 0   | 0.51  | 2.10 |
| 5  | -13 | -6  | 1.28  | 2.09 |
| 2  | -9  | -12 | 1.59  | 1.72 |
| 3  | -15 | 0   | -0.37 | 1.82 |
| 6  | -9  | 10  | 0.85  | 1.67 |
| 5  | 13  | -6  | -0.73 | 1.92 |
| 0  | 13  | 8   | 1.47  | 2.02 |
| 0  | -13 | -8  | -0.78 | 2.17 |
| 11 | -8  | 4   | 1.30  | 1.77 |
| 8  | -10 | 7   | 1.36  | 1.06 |
| 7  | -8  | 10  | -0.34 | 1.71 |
| 5  | 9   | -11 | 0.54  | 2.04 |
| 10 | -8  | -7  | 0.96  | 1.90 |
| 10 | 8   | -7  | 0.33  | 1.53 |
| 3  | -10 | -11 | -3.93 | 2.42 |
| 10 | 9   | 5   | -1.50 | 1.98 |
| 2  | 9   | -12 | 1.70  | 2.01 |
| 10 | -7  | -8  | 1.62  | 2.01 |
| 5  | 7   | 12  | 1.25  | 1.67 |
| 10 | 7   | -8  | 0.65  | 2.06 |
| 9  | 0   | 11  | 1.25  | 1.14 |
| 0  | -13 | 8   | -1.83 | 2.09 |
| 0  | 13  | -8  | 1.42  | 1.84 |
| 12 | 5   | 5   | 0.30  | 1.86 |
| 9  | -6  | -10 | -3.29 | 2.03 |
| 12 | -5  | 5   | -0.18 | 1.80 |
| 3  | 10  | -11 | -0.21 | 1.36 |
| 10 | -9  | 5   | 1.14  | 1.64 |
| 12 | 7   | -3  | -3.28 | 1.86 |
| 5  | -7  | 12  | -2.19 | 1.82 |
| 1  | -13 | -8  | -2.62 | 2.12 |

|    |     |     |       |      |
|----|-----|-----|-------|------|
| 6  | 11  | 8   | -2.04 | 1.80 |
| 3  | -15 | -1  | -3.92 | 2.22 |
| 12 | -7  | -3  | 1.45  | 1.77 |
| 9  | 6   | -10 | 2.39  | 1.65 |
| 3  | 15  | -1  | -0.55 | 2.04 |
| 13 | 2   | 4   | 4.23  | 1.42 |
| 9  | -11 | -4  | 2.42  | 2.02 |
| 9  | 11  | -4  | 2.43  | 1.31 |
| 13 | -2  | 4   | 0.20  | 1.57 |
| 10 | 10  | 3   | 1.14  | 1.79 |
| 3  | 4   | 14  | 2.66  | 1.20 |
| 12 | 6   | 4   | 0.30  | 1.64 |
| 1  | 13  | -8  | -1.44 | 1.87 |
| 5  | -2  | -14 | 0.46  | 1.59 |
| 5  | 2   | -14 | -0.24 | 2.25 |
| 3  | -4  | 14  | 2.28  | 1.67 |
| 13 | 5   | 0   | 2.40  | 1.65 |
| 3  | 15  | 1   | -1.27 | 1.80 |
| 6  | -11 | 8   | 0.15  | 2.02 |
| 3  | -15 | 1   | -0.20 | 1.74 |
| 7  | -2  | -13 | -0.65 | 1.86 |
| 12 | -6  | 4   | 0.14  | 1.71 |
| 10 | -10 | 3   | 1.58  | 1.33 |
| 13 | -5  | 0   | 2.77  | 1.37 |
| 0  | 0   | -15 | -3.03 | 1.82 |
| 7  | 2   | -13 | 1.95  | 2.11 |
| 7  | 11  | 7   | 1.58  | 1.22 |
| 0  | 0   | 15  | -0.18 | 1.64 |
| 13 | 5   | -1  | 0.45  | 2.03 |
| 13 | -5  | -1  | -0.83 | 1.85 |
| 9  | -1  | 11  | -0.02 | 1.46 |
| 9  | 1   | 11  | -2.57 | 1.76 |
| 8  | -6  | -11 | 2.53  | 1.23 |
| 1  | 0   | -15 | 2.05  | 1.66 |
| 5  | 14  | 3   | 2.05  | 1.72 |
| 6  | -12 | -7  | 0.17  | 2.07 |
| 8  | 6   | -11 | 1.99  | 1.90 |
| 2  | -14 | -6  | 0.87  | 1.62 |
| 6  | 12  | -7  | -1.31 | 1.95 |
| 7  | -11 | 7   | 3.81  | 1.16 |
| 5  | -14 | 3   | 0.72  | 1.87 |
| 4  | 6   | 13  | -0.34 | 1.77 |
| 1  | 13  | 8   | -0.21 | 2.01 |
| 2  | 14  | -6  | 1.27  | 1.24 |
| 13 | 2   | -5  | -0.34 | 1.83 |
| 13 | -2  | -5  | 2.38  | 1.95 |
| 6  | 3   | 13  | 2.29  | 1.15 |
| 6  | 6   | 12  | -4.18 | 1.95 |
| 11 | -5  | -8  | 2.54  | 1.87 |
| 9  | 8   | 8   | 0.63  | 1.28 |
| 6  | -13 | -5  | -0.79 | 2.06 |
| 6  | -3  | 13  | 1.43  | 1.10 |
| 9  | -4  | -11 | 0.77  | 2.03 |
| 11 | 5   | -8  | 2.18  | 1.22 |
| 4  | -6  | 13  | -3.35 | 2.10 |
| 6  | 13  | -5  | 0.72  | 1.73 |
| 7  | 13  | -3  | 2.62  | 1.75 |
| 11 | 8   | -5  | -2.54 | 2.07 |

|    |     |     |       |      |
|----|-----|-----|-------|------|
| 9  | 4   | -11 | 0.98  | 1.84 |
| 11 | -8  | -5  | 0.64  | 1.94 |
| 0  | -1  | -15 | -2.58 | 1.85 |
| 1  | -13 | 8   | 0.53  | 1.88 |
| 10 | 0   | 10  | 1.25  | 1.67 |
| 7  | -13 | -3  | -1.16 | 2.03 |
| 0  | 1   | 15  | 0.46  | 1.54 |
| 4  | -13 | -7  | 0.34  | 2.00 |
| 0  | -1  | 15  | 2.07  | 1.13 |
| 6  | -6  | 12  | -0.68 | 1.68 |
| 0  | 1   | -15 | 0.46  | 1.78 |
| 3  | -12 | -9  | -0.02 | 1.88 |
| 9  | -8  | 8   | 0.47  | 1.84 |
| 9  | 5   | 10  | 0.14  | 1.72 |
| 1  | -1  | -15 | -1.62 | 1.85 |
| 1  | 1   | -15 | 1.84  | 1.10 |
| 11 | 9   | 2   | 2.12  | 1.90 |
| 4  | 13  | -7  | -0.72 | 1.69 |
| 2  | 5   | 14  | -1.45 | 1.63 |
| 12 | 0   | 7   | 1.73  | 1.83 |
| 12 | -5  | -6  | -0.83 | 1.81 |
| 9  | 9   | 7   | 1.13  | 1.56 |
| 8  | -12 | -4  | 1.44  | 2.08 |
| 4  | -4  | -14 | 0.78  | 1.71 |
| 2  | -15 | -3  | -0.71 | 1.61 |
| 12 | 5   | -6  | -3.59 | 1.92 |
| 2  | 15  | -3  | -4.51 | 2.14 |
| 3  | 12  | -9  | -2.84 | 1.99 |
| 11 | -9  | 2   | 2.30  | 1.97 |
| 9  | -5  | 10  | -0.52 | 1.86 |
| 8  | 12  | -4  | 0.17  | 1.80 |
| 2  | -5  | 14  | -1.18 | 1.67 |
| 12 | 6   | -5  | 2.26  | 1.93 |
| 12 | -6  | -5  | 2.24  | 1.79 |
| 4  | 4   | -14 | 2.12  | 1.96 |
| 9  | -9  | 7   | 0.83  | 1.53 |
| 0  | 0   | 0   | 0.00  | 0.00 |

*i*  
\_shelx\_hkl\_checksum 8228
